# Supplementary material for: Targeting mitochondrial phosphatidylethanolamine alters mitochondrial metabolism and proliferation in hepatocellular carcinoma
Source: Research Square preprint supplement (doi:10.21203/rs.3.rs-7042684/v1), 2025-07-15
Supplement: Supplementary file 1 [file 0d03b1e26efc8a57b18beea5.xlsx]

## Sheet: Sheet1
Supplemental Table 2. Metabolomics Data Set of shSCR and shPISD treated cells. These data were normalized to the total protein content of each sample.
Mode	Index	Compounds	Class I	Class II	Formula	Q1 (Da)	Molecular weight (Da)	RT (min)	Adduct	Mass error	Level	score	LC mode	CAS	PubChem	HMDB	Metlin	cpd_ID	Endogenous/Exogenous	shSCR 1	shSCR 2	shSCR 3	shPISD 1	shPISD 2	shPISD 3	QC01	QC02	QC03	kegg_map
T3_positive	MW0169549	Niacinamide	Alcohol and amines	Amines	C6H6N2O	123.054	122.048	1.7382	[M+H]+	3.31462	1	0.9677	rp	98-92-0	936	HMDB0001406	1497	C00153	A	450450	400108	425227	346443	398982	446229	421632	421988	421990	ko00760,ko01100,ko01240,ko04977
T3_positive	MW0145223	N-(2-hydroxyethyl-1,1,2,2-d4)-5Z,8Z,11Z,14Z-eicosatetraenamide	Alcohol and amines	Amines	C22H37NO2	352.314	347.282	6.4029	[M+H]+	2.17713	2	0.8849	rp	946524-40-9	24762159	-	96417	-	B	72019.9	68792.6	84426.7	38318.3	66414.5	84666.8	65294.8	65989.5	65374.8	-
T3_positive	MW0116980	Veliparib	Alcohol and amines	Amines	C13H16N4O	245.133	244.132	3.1163	[M+H]+	17.0358	2	0.7876	rp	912444-00-9	11960529	-	-	-	B	20896.4	18738.9	22432.4	10801	16628.3	13991.3	17246	17269.4	17246.2	-
T3_positive	MW0108984	Oleoyl Ethyl Amide	Alcohol and amines	Amines	C20H38NO-	310.307	308.295	7.1355	[M+H]+	7.11351	2	0.8543	rp	85075-82-7	53442596	-	44905	-	B	130454	57882.6	61786.8	84239.6	86421.9	40573.5	71412.1	71725.2	68792.3	-
T3_positive	MW0163310	2-Decaprenylphenol	Alcohol and amines	Alcohols	C56H86O	775.675	774.668	6.9425	[M+H]+	14.0289	4	0.7479	rp	7718-32-3	25245964	-	-	-	B	2074.27	2916.55	2428.26	1548.52	2909.01	3539.66	2459.84	2521.41	2516.94	-
T3_positive	MW0114902	1H-Isoindole-1,3(2H)-dione, 2-[2-(2,4-dihydroxyphenyl)-2-oxoethyl]-	Alcohol and amines	Amines	C16H11NO5	315.089	297.064	6.9071	[M+NH4]+	0.69375	4	0.733	rp	65190-77-4	2243950	-	-	-	B	2089.36	2607.92	1957.43	2064.54	1753.8	1815.7	8239.91	8449.06	8260.94	-
T3_positive	MEDP0129	Phenethylamine	Alcohol and amines	Amines	C8H11N	122.094	121.089	2.0695	[M+H]+	4.5899	1	0.7805	rp	64-04-0	1001	HMDB0012275	-	C05332	A	2020.57	3510.18	2600.69	1368.33	3088.18	1818.69	6376.15	7894.17	7084.97	ko00360,ko01100
T3_positive	MW0006930	Dopamine	Alcohol and amines	Polyamines	C8H11NO2	136.073	153.079	1.4489	[M+H-H2O]+	5.45	3	0.7809	rp	62-31-7	681	HMDB0000073	64	C03758	A	107738	123670	125127	100967	129983	130615	94252.1	97947.6	93191.2	ko00350,ko01100,ko04024,ko04080,ko04540,ko04721,ko04728,ko04917,ko04976,ko05012,ko05030,ko05031,ko05032,ko05034
T3_positive	MW0144969	N-Nitroso-N-methyl-N-hydroxymethylamine	Alcohol and amines	Amines	C2H6N2O2	108.078	90.0429	0.8476	[M+NH4]+	1.93133	4	0.704	rp	58840-25-8	119111	-	-	C20301	B	3362.76	2477.04	2947.61	2683.39	659.727	2653.43	1943.08	1970.72	1995.5	ko05204
T3_positive	FDATP00888	Cetrimonium bromide	Alcohol and amines	Amines	C19H42BrN	284.327	363.25	6.7662	[M+]+	8.57521	1	0.718	rp	57-09-0	5974	-	-	-	B	11279.9	4826.21	9706.35	4128.71	22110.3	10633.3	9192.38	9307.72	9269.95	-
T3_positive	MADP0489	Heptethylene glycol	Alcohol and amines	Alcohols	C14H30O8	327.197	326.194	3.0084	[M+H]+	8.27887	1	0.8423	rp	5617-32-3	79718	HMDB0061835	-	-	B	1959.53	7002.04	2050.69	1700.88	9650.43	2045.47	13480.3	14427.7	14527.9	-
T3_positive	MW0118469	2-chloro-N,N-dimethylnicotinamide	Alcohol and amines	Amines	C8H9ClN2O	185.044	184.04	0.0489	[M+H]+	1.64825	4	0.7104	rp	52943-21-2	10965214	-	-	-	B	1566.63	1773.11	713.897	1601.12	608.961	18147.3	1370.17	1344.9	1368.63	-
T3_positive	MW0111540	(3-Aminomethyl-5-methyl-cyclohexyl)-methanol	Alcohol and amines	Alcohols	C9H19NO	158.152	157.147	6.1823	[M+H]+	4.16075	4	0.9061	rp	498531-57-0	3107848	-	-	-	B	204813	179948	182645	169107	166257	175277	179411	179210	179247	-
T3_positive	MW0016331	Chalinastanol	Alcohol and amines	Alcohols	C28H50O	403.392	402.386	6.6936	[M+H]+	4.50195	3	0.7503	rp	474-60-2	22833530	HMDB0000534	5519	-	B	154129	123536	158576	65315.3	106835	144636	118475	118078	117980	-
T3_positive	MW0157951	(1S,2R)-3-Methylcyclohexa-3,5-diene-1,2-diol	Alcohol and amines	Alcohols	C7H10O2	91.0525	126.068	2.1047	[M+H-2H2O]+	4.2	3	0.818	rp	41977-20-2	440399	-	-	C04592	B	2564.76	2252.07	2337.96	2195.67	2520.22	2523.99	2474.63	2473.02	2482.36	ko01100
T3_positive	MW0116871	1-(1-Benzothiophen-3-Yl)methanamine	Alcohol and amines	Amines	C9H9NS	164.054	163.046	1.6131	[M+H]+	1.425	4	0.7156	rp	40615-04-1	2776347	-	-	-	B	1903.81	1501.36	793.298	660.906	1612.98	1675.24	1589.76	1627.04	1567.06	-
T3_positive	MW0105003	3-Dechloroethylifosfamide	Alcohol and amines	Amines	C5H12ClN2O2P	236.995	198.032	1.5691	[M+K]+	1.225	3	0.9193	rp	36761-83-8	114861	HMDB0013858	-	C16550	B	6152.88	5413.29	6218.86	4303.4	5519.39	4744.57	5562.69	5465.16	5544.96	ko00982
T3_positive	MW0104996	3-chloro-N-cyclopentylpropanamide	Alcohol and amines	Amines	C8H14ClNO	198.059	175.076	0.5864	[M+Na]+	0.9795	4	0.7261	rp	349403-75-4	4103610	-	-	-	B	2820	2622.03	3376.05	2688.85	2355.45	2938.53	2606.23	2613.87	2615.73	-
T3_positive	MW0143663	5-Methylthiopentanaldoxime	Alcohol and amines	Alcohols	C6H13NOS	186.032	147.072	1.612	[M+K]+	1.962	4	0.9533	rp	32377-75-6	25010757	-	-	C17245	B	304409	1.14547e+06	1.2102e+06	1.05437e+06	1.89132e+06	247514	1.4564e+06	1.31747e+06	1.48006e+06	ko01210
T3_positive	MW0114590	Hexaethylene glycol	Alcohol and amines	Alcohols	C12H26O7	300.196	282.168	2.9987	[M+NH4]+	7.16964	1	0.8856	rp	2615-15-8	17472	HMDB0061822	-	-	B	9078.41	22219.6	14185.1	13798.2	16819.2	7794.04	13345.4	13343.9	13370.1	-
T3_positive	MW0111694	1,2-Ethanediol	Alcohol and amines	Alcohols	C2H6O2	85.0268	62.0368	0.8105	[M+Na]+	1.68023	2	0.7815	rp	25322-68-3	174	HMDB0037790	-	C15588	B	2405.55	2038.86	3021.98	3257.88	3484.02	1864.11	2462.07	2457.24	2491.76	-
T3_positive	MW0142857	3-Buten-1-amine	Alcohol and amines	Amines	C4H9N	72.0797	71.0735	0.8676	[M+H]+	2.69589	3	0.7942	rp	2524-49-4 | 783295-28-3	443732	-	-	C12244	B	21049.6	20380.2	23524.8	18093.2	24488.8	24401.2	23388.8	23015.5	23503	-
T3_positive	MW0053496	Geranylgeraniol	Alcohol and amines	Alcohols	C20H34O	329.226	290.261	6.6877	[M+K]+	4.325	3	0.8178	rp	24034-73-9 | 7614-21-3	5281365	-	53578	C09094	B	11284.4	9284.08	11521.6	5586.3	7655.51	7788.72	7939.8	8082.92	7963.18	-
T3_positive	MW0123438	Cyanazine	Alcohol and amines	Alcohols	C9H13ClN6	241.101	240.089	4.1119	[M+H]+	12.7336	2	0.7449	rp	21725-46-2	30773	-	-	C14299	B	5334.34	4820.83	4834.37	4687.64	4265.67	6210.63	4686.79	4651.64	4627.58	-
T3_positive	MW0115103	Pentapropylene glycol	Alcohol and amines	Alcohols	C15H32O6	309.223	308.22	4.6137	[M+H]+	9.72225	4	0.8075	rp	21482-12-2	9836244	-	-	-	B	14047.4	13140.3	13782.8	6893.7	12600.7	8847.75	11684.8	11508.3	11457.1	-
T3_positive	MW0139158	N-isobutyl-2-oxo-2H-chromene-3-carboxamide	Alcohol and amines	Amines	C14H15NO3	263.143	245.105	0.5864	[M+NH4]+	9.5165	4	0.8107	rp	1846-84-0	823440	-	-	-	B	27346.9	30924.9	32052.9	27941.9	25260.4	32782	29397.2	29583.8	29491.8	-
T3_positive	MW0117028	6-Chloro-5-methyl-1-((2-(2-methylpyrid-3-yloxy)pyrid-5-yl)carbamoyl)indoline	Alcohol and amines	Amines	C21H19ClN4O2	417.103	394.12	5.4018	[M+Na]+	15.3057	2	0.8188	rp	181632-25-7	3644637	-	45379	-	B	4999.24	6200.52	4548.06	11817.7	5119.29	4820.45	4770.5	4540.45	4544.96	-
T3_positive	MW0160134	Serotonin O-sulfate	Alcohol and amines	Amines	C10H12N2O4S	274.089	256.052	0.8288	[M+NH4]+	1.944	4	0.7037	rp	16310-20-6 | 124575-88-8	152151	-	-	-	B	4739.73	3531.02	4422.68	3508	3657.85	3716.98	3996.04	3981.72	3964.29	-
T3_positive	MW0119725	2,4-Dihydroxy-3-nitroquinoline	Alcohol and amines	Alcohols	C9H6N2O4	207.036	206.033	1.5619	[M+H]+	1.89175	4	0.9549	rp	15151-57-2	54680162	-	-	-	B	81764.7	76032.9	82174	67297.7	84997.1	72930.7	75600.2	76100.2	75611.2	-
T3_positive	MW0105000	(S)-2-Amino-3-cyclohexylpropanamide	Alcohol and amines	Amines	C9H18N2O	193.129	170.142	4.7694	[M+Na]+	4.78325	4	0.8936	rp	145232-34-4	11745071	-	-	-	B	64542	62808.3	65078.6	58023.1	58404.2	62683.7	63029.8	63052.9	63292.6	-
T3_positive	MW0145031	Aminopentol	Alcohol and amines	Alcohols	C22H47NO5	406.347	405.345	5.4778	[M+H]+	15.848	4	0.7264	rp	145040-09-1	21119850	-	-	C19805	B	15320.5	13109.2	15737.6	11272.9	11373.4	14940.8	14100.4	14063.6	14042.8	-
T3_positive	MW0168484	Ethanolamine	Alcohol and amines	Amines	C2H7NO	84.0428	61.0528	1.431	[M+Na]+	1.85	3	0.9252	rp	141-43-5	700	HMDB0000149	3207	C00189	A	2499.12	1605.78	2162.32	1844.03	705.057	2099.45	1821.81	1820.45	1847.28	ko00564,ko01100,ko04723
T3_positive	MW0104717	N-(Chloroacetyl)allylamine	Alcohol and amines	Amines	C5H8ClNO	151.059	133.029	0.8786	[M+NH4]+	1.396	4	0.7163	rp	13269-97-1	98788	-	-	-	B	6420.33	5921.81	7505.21	4438.61	5079.93	5265.44	5273.34	5220.6	5264.89	-
T3_positive	MW0159392	Westiellamide	Alcohol and amines	Amines	C27H42N6O6	564.352	546.317	3.6231	[M+NH4]+	1.87602	3	0.8301	rp	131998-54-4	159587	-	-	-	B	1799.68	2692.86	1908.07	1648.23	2918.74	1843.72	3819.86	3828.24	3913.14	-
T3_positive	MEDN0682	Octadecanamide	Alcohol and amines	Amines	C18H37NO	284.291	283.288	6.9604	[M+H]+	5.93968	1	0.9365	rp	124-26-5	31292	HMDB0034146	-	C13846	A	153119	83653	102242	112977	72432.1	67611.1	106224	106373	104111	-
T3_positive	MW0123757	Dorzolamide	Alcohol and amines	Amines	C10H16N2O4S3	325.039	324.027	1.4177	[M+H]+	0.548	4	0.7365	rp	120279-96-1	5284549	HMDB0015007	-	C06969	B	20344.3	20699.6	13064.1	15506.2	20928.9	15724.3	11823.6	9515.83	10797.8	-
T3_positive	MW0111314	Thioetheramide PC	Alcohol and amines	Amines	C40H84N2O5PS+	734.555	735.584	6.9425	[M+]+	12.5147	2	0.7926	rp	116457-99-9	10259407	-	63018	C04873	B	10596.6	6952.93	7396.69	165314	106490	78667.7	351305	248853	330418	-
T3_positive	MEDP1197	Hypotaurocyamine	Alcohol and amines	Polyamines	C3H9N3O2S	152.055	151.042	1.7709	[M+H]+	16.6776	1	0.8514	rp	1119-54-6	11062553	-	-	C02419	A	65709.3	40549.1	60333.4	34423.6	25699.8	52544.9	48403.4	48383.7	47553.2	-
T3_positive	MW0110995	Diethanolamine	Alcohol and amines	Amines	C4H11NO2	70.0642	105.079	0.8288	[M+H-2H2O]+	1.6234	1	0.8977	rp	111-42-2	8113	HMDB0004437	3239	C06772	B	22915.6	19234.9	23374.3	19760.8	22087.7	25941.8	22940.1	22963	23051.1	ko00564
T3_positive	MEDL01000	Octopamine	Alcohol and amines	Polyamines	C8H11NO2	153.075	153.079	0.8676	[M+]+	10.3637	1	0.7403	rp	104-14-3	4581	HMDB0004825	61	-	A	21874.5	19956	22968.8	15465.4	20406.3	21680.5	21083.5	21179.3	20993.3	-
T3_positive	MW0115638	3-Chloro-1H-pyrazol-4-amine	Alcohol and amines	Amines	C3H4ClN3	155.972	117.009	5.8667	[M+K]+	1.56275	4	0.7124	rp	103286-54-0	114020	-	-	-	B	1.36099e+06	1.25449e+06	1.27144e+06	1.34978e+06	1.01553e+06	882593	1.2063e+06	1.20577e+06	1.17853e+06	-
T3_positive	MW0111331	Tridodecylamine	Alcohol and amines	Amines	C36H75N	522.59	521.59	6.7301	[M+H]+	13.3576	3	0.8648	rp	102-87-4	7624	HMDB0037822	-	-	A	527.796	2118.48	3492.22	6527.1	6728.63	5119.28	17411.6	17846.5	12580.5	-
T3_positive	MW0108134	Mephentermine	Alcohol and amines	Amines	C11H17N	164.141	163.136	3.1524	[M+H]+	5.80382	2	0.816	rp	100-92-5	3677	HMDB0015452	-	C07889	B	2535.18	2937.14	3441.59	2828.34	2472.05	3391.66	2412.19	2253.53	2387.73	-
T3_positive	MEDP1212	1,3-Dicyclohexylurea	Alcohol and amines	Polyamines	C13H24N2O	225.194	224.189	6.2284	[M+H]+	4.97712	1	0.9222	rp	-	4277	HMDB0244166	-	-	B	381927	342543	361158	334364	315535	333849	338830	339724	339054	-
T3_positive	MW0115350	Tetraethylene glycol	Alcohol and amines	Alcohols	C8H18O5	195.12	194.115	2.3501	[M+H]+	6.48328	1	0.9017	rp	-	8200	HMDB0094708	-	-	B	1073.37	2966.26	1149.13	958.45	1865.24	1179.79	5483.62	5493.95	5610.43	-
T3_positive	MEDP1892	Tetradecylamine	Alcohol and amines	Amines	C14H31N	214.25	213.246	6.1404	[M+H]+	4.63888	1	0.8299	rp	-	16217	HMDB0258887	-	-	B	10979.4	25765.5	19636.6	12904.2	22060.2	23266.7	9461.16	9756.44	9554.79	-
T3_positive	MW0114796	Malyngamide J	Alcohol and amines	Amines	C33H53NO9	608.377	607.372	3.7159	[M+H]+	2.75533	2	0.8193	rp	-	21774834	-	65447	-	B	2049.04	2351.42	1718.83	1307.48	2506.27	1599.5	2732.49	2741.7	2800.11	-
T3_positive	MW0110992	Dicyclohexylamine	Alcohol and amines	Amines	C12H23N	182.188	181.183	3.6231	[M+H]+	4.35526	2	0.779	rp	-	7582	HMDB0251214	-	C14686	A	361674	15341.2	3703.16	4703.8	1980.61	4489.4	39194.6	39438	39364.3	-
T3_positive	MW0109034	palmyramide A	Alcohol and amines	Amines	C36H53N3O9	689.415	671.378	7.6422	[M+NH4]+	3.95304	2	0.7718	rp	-	45380200	-	65383	-	B	9043.34	9191.34	7884.05	7130.8	7011.03	5739.19	6207.58	6050.45	6102.08	-
T3_positive	MW0150621	Methyl 4,7-anhydro-2,3-dideoxy-7-phenylheptonate	Alcohol and amines	Alcohols	C14H18O5	231.105	266.115	0.5864	[M+H-2H2O]+	7.68033	2	0.7453	rp	-	53393984	-	44860	-	B	114474	114163	133037	103765	103522	127112	107197	107230	106275	-
T3_positive	MW0118547	3-Pyridinemethanol	Alcohol and amines	Alcohols	C6H7NO	110.063	109.053	4.4577	[M+H]+	7.28083	2	0.7419	rp	-	7510	HMDB0245980	-	-	A	13176.9	10638.7	12736.9	8757.84	10797.3	11796.6	10182.3	10691.1	9775.36	-
T3_positive	MW0121577	N-(2-(Methylamino)ethyl)-5-isoquinolinesulfonamide	Alcohol and amines	Amines	C12H15N3O2S	283.123	265.089	0.8615	[M+NH4]+	3.45651	2	0.7315	rp	-	3540	HMDB0247517	-	-	B	186195	167926	191080	127179	164321	170923	164575	164588	164889	-
T3_positive	MW0061660	Phytol	Alcohol and amines	Alcohols	C20H40O	314.338	296.308	6.7838	[M+NH4]+	4.26599	2	0.703	rp	-	5366244	-	-	C01389	B	37690	36355.1	31645.8	19107.9	27438.2	31293	28168.4	27810.2	27810.4	-
T3_positive	MW0108624	Acetylglutamine	Alcohol and amines	Amines	C7H12N2O4	233.056	188.08	0.8646	[M-H+2Na]+	13.725	3	0.7744	rp	-	25561	HMDB0006029	-	-	B	30457	24821.5	21266.3	14790.6	24273.4	28179.6	25138.3	25215.9	24984.3	-
T3_positive	MW0161276	Estra-1,3,5(10)-triene-3,17-diol	Alcohol and amines	Alcohols	C18H24O2	336.184	272.178	6.7485	[M+CH3CN+Na]+	22.825	3	0.7575	rp	-	9811784	-	-	-	B	9524.62	9905.13	12585.3	7675.91	10502.7	9530.37	9858.3	10634.9	10698.6	-
T3_positive	MW0154083	N(alpha)-gamma-L-Glutamylhistamine	Alcohol and amines	Amines	C10H16N4O3	317.045	240.122	6.0636	[M-H+2K]+	9.65	3	0.7304	rp	-	440238	-	-	C04138	B	8665.59	7393.35	8580.59	7876.24	7713.35	7857.55	8075.72	8056.5	8081.27	-
T3_positive	MW0166071	n-Methyl-l-valyl-l-tryptophanol	Alcohol and amines	Amines	C17H25N3O2	350.203	303.195	3.2877	[M+HCOO+2H]+	11.325	3	0.7261	rp	-	91115345	-	-	-	B	2413.87	1444.11	2064.18	931.475	1836.39	1527	1666.4	1604.53	1621.17	-
T3_positive	MW0115031	Nonapropylene glycol	Alcohol and amines	Alcohols	C27H56O10	558.416	540.387	6.4004	[M+NH4]+	11.7478	4	0.7779	rp	-	21989361	-	-	-	B	11003.8	10283.9	12270.9	9654.35	4979.19	9735.51	10195.6	10172	10218.7	-
T3_positive	MW0104425	2-{[(4-chlorophenyl)methyl]amino}-N-(2-fluorophenyl)acetamide	Alcohol and amines	Amines	C15H14ClFN2O	315.069	292.078	4.4378	[M+Na]+	0.32725	4	0.7419	rp	-	28738623	-	-	-	B	7873.09	6766.3	6750.91	5878.55	6217.59	6819.04	6794.65	6685.96	6779.94	-
T3_positive	MW0110999	N,N-DIETHYLANILINE	Alcohol and amines	Amines	C10H15N	150.125	149.12	7.6771	[M+H]+	1.37625	4	0.7168	rp	-	7061	HMDB0255255	-	-	A	55217.9	13366	13616.5	7444.33	11622.4	3666.11	14142.3	15241.1	10891.2	-
T3_positive	ZINC33605142	(1S,3S)-3-Methylcyclopentadecane-1-ol	Alcohol and amines	Alcohols	C16H32O	258.275	240.245	5.6982	[M+NH4]+	1.7105	4	0.709	rp	-	10236172	-	-	-	B	1692.46	556.054	2191.91	629.172	457.04	469.098	1151.5	1122.93	1199.87	-
T3_positive	MW0055170	Muzanzagenin	Alcohol and amines	Alcohols	C27H38O5	460.305	442.272	3.8664	[M+NH4]+	2.09035	4	0.7004	rp	-	10836928	HMDB0032601	-	-	B	2797.41	2642.6	2796.18	936.17	2626.97	2640.82	2759.82	2770.54	2770.68	-
T3_negative	MW0111144	N-(5-methyl-1,3-thiazol-2-yl)-2-(phenylsulfanyl)acetamide	Alcohol and amines	Amines	C12H12N2OS2	263.035	264.039	3.0843	[M-H]-	0.26125	4	0.7435	rp	353253-49-3	900889	-	-	-	B	318722	98163.5	44354.4	74787	12190.3	109875	107196	96143.8	103010	-
T3_negative	MW0167780	Dihydroartemisinin(DHA)	Alcohol and amines	Alcohols	C15H24O5	265.144	284.162	6.0894	[M-H2O-H]-	9.99143	1	0.7132	rp	-	131770024	-	-	-	B	4677.37	4287.64	4602.36	2989.87	4422.95	4283.23	4515.34	4611.56	4605.54	-
T3_negative	MW0156413	Rishitin	Alcohol and amines	Alcohols	C14H22O2	221.156	222.162	6.3904	[M-H]-	5.73941	3	0.8401	rp	-	108064	HMDB0302980	-	C09715	B	21952.3	18341.8	23633.9	24827	21289.7	29633.2	24244.8	24448.5	24372.8	-
T3_negative	MW0148264	2-[(E)-3,7,11,15-tetramethylhexadec-2-enyl]naphthalene-1,4-diol	Alcohol and amines	Alcohols	C30H46O2	438.344	438.35	6.9421	[M-]-	18.9931	3	0.7222	rp	-	15927131	-	-	C21084	B	80740.4	75379.9	81704.7	84398.8	74442.2	76030.1	76223.1	79331	75948.4	ko00130,ko01100,ko01240
HILIC_negative	MW0160187	Maltotriose	Alcohol and amines	Alcohols	C18H32O16	549.166	504.169	4.7039	[M+HCOO]-	2.58775	1	0.9111	hilic	9005-82-7 | 6401-81-6 | 133137-05-0 | 1109-28-0	192826	-	-	-	B	25671.3	28570.8	22388.4	23919	36203.1	24064.3	25923.3	26056	25881.8	-
HILIC_negative	MW0156581	Inositol	Alcohol and amines	Alcohols	C6H12O6	179.057	180.063	3.8553	[M-H]-	0.269817	1	0.9277	hilic	87-89-8 | 643-12-9 | 488-59-5 | 6917-35-7 | 488-58-4 | 551-72-4 | 41546-34-3 | 643-10-7 | 488-55-1 | 488-54-0 | 576-63-6 | 38876-99-2	892	HMDB0000211	144	C00137 | C06151 | C06152 | C06153 | C19891	A	145204	160376	211712	256818	214070	247293	235886	249106	247503	-
HILIC_negative	MW0141097	Ethanol, 1,2-dichloro-	Alcohol and amines	Alcohols	C2H4Cl2O	172.977	113.964	1.6498	[M+CH3COO]-	2.79768	3	0.7502	hilic	74054-85-6	156449	-	-	C20305	B	4824.45	4502.83	4603.23	3452.79	3371.91	4816.54	4415.89	4461.73	4437.5	ko05204
HILIC_negative	MW0108210	Methazolamide	Alcohol and amines	Amines	C5H8N4O3S2	235.001	236.004	1.274	[M-H]-	13.4804	1	0.7511	hilic	554-57-4	4100	HMDB0014841	43249	C07764	B	161279	136081	161156	134807	124947	146946	148152	147406	147981	-
HILIC_negative	MEDP1645	Benzamide	Alcohol and amines	Amines	C7H7NO	120.038	121.053	3.5316	[M-H]-	0.59025	4	0.7355	hilic	55-21-0	2331	HMDB0004461	-	C09815	A	4779.64	4495.06	5060.98	4797.08	4703.47	5192.15	4586.1	4565.57	4614.35	-
HILIC_negative	MW0114734	L-Iditol	Alcohol and amines	Alcohols	C6H14O6	217.048	182.079	2.5495	[M+Cl]-	1.0405	1	0.8121	hilic	488-45-9	5460044	HMDB0011632	-	C01507	B	7952.7	8852.92	7620.43	6394.94	7020.71	6615.95	8760.42	8761.02	8100.8	-
HILIC_negative	MW0116090	Pimasertib	Alcohol and amines	Amines	C15H15FIN3O3	430.01	431.014	4.2537	[M-H]-	4.76591	2	0.7605	hilic	-	44187362	-	-	C71933	B	3192.95	3601.1	3481.68	3960.92	3935.34	3247.72	3414.85	3468.39	3452.7	-
HILIC_negative	MW0128305	(7'R,8'R)-4,7'-Epoxy-3',5-dimethoxy-4',9,9'-lignanetriol 9'-glucoside	Alcohol and amines	Alcohols	C26H34O11	521.205	522.21	1.4846	[M-H]-	0.190718	3	0.7335	hilic	-	14558383	HMDB0038711	-	-	B	7240.74	5269.44	7860.86	1406.88	1998.57	1406.87	4344.3	4502.34	3171.03	-
HILIC_negative	ZINC43938753	(2S,3R)-2-(Hexadecanoylamino)octadeca-4,8-diene-1,3-diol	Alcohol and amines	Alcohols	C34H65NO3	534.489	535.496	0.8078	[M-H]-	0.831379	4	0.9796	hilic	-	14331917	-	-	-	B	10323	8589.59	8069.31	9881.37	7713.9	13410.9	7210.8	7348.72	7234.37	-
HILIC_negative	MW0114962	N-Acetylhexosamine	Alcohol and amines	Amines	C8H15NO6	220.083	221.09	2.1132	[M-H]-	0.15675	4	0.7461	hilic	-	899	HMDB0248228	-	C02711	A	6471.1	7034.33	7173.53	5349.5	5638.65	7460.24	6298.96	6317.55	6297.57	-
T3_positive	MW0131297	3-(4-bromophenyl)-7-hydroxy-4H-chromen-4-one	Aldehyde,Ketones,Esters	Ketones	C15H9BrO3	338.963	315.974	5.8974	[M+Na]+	1.26325	4	0.9694	rp	96644-05-2	5398367	-	-	-	B	6501.16	10797	6438.71	11096.4	11096.9	11635.9	52976.8	37810.9	34436.3	-
T3_positive	MW0123317	Chlorzoxazone	Aldehyde,Ketones,Esters	Ketones	C7H4ClNO2	187.029	168.993	5.0707	[M+NH4]+	4.5002	1	0.7728	rp	95-25-0	2733	HMDB0014500	-	C07931	B	24522.7	10999.9	37311.7	10079.6	43269.1	3068.03	21912.6	15509.7	21519.7	-
T3_positive	MW0052606	Ergostane-3,6-dione	Aldehyde,Ketones,Esters	Ketones	C28H46O2	415.354	414.35	6.724	[M+H]+	1.53321	3	0.7026	rp	88662-00-4	76380930	HMDB0032004	-	-	B	1928.5	2088.46	2078.57	2715.34	1628.78	2416.16	3156.49	3131.19	3155.26	-
T3_positive	MW0116639	1,3-bis(4-Bromophenyl)-5-phenyl-2,4-imidazolidinedione	Aldehyde,Ketones,Esters	Ketones	C21H14Br2N2O2	484.955	485.94	1.0941	[M+H]+	10.6778	2	0.7088	rp	878533-35-8	11851013	-	45146	-	B	4790.46	1427.28	2584.3	1786.22	2812.75	2978.2	4163.68	4276.5	3869.43	-
T3_positive	MW0160427	Ascorbigen	Aldehyde,Ketones,Esters	Ketones	C15H15NO6	344.054	305.09	1.4855	[M+K]+	0.15675	4	0.9961	rp	8075-98-7	3081416	-	-	-	B	9954.71	8794.64	10059.5	7994.61	9604.67	11223.5	11611.6	11603.3	11621.8	-
T3_positive	MW0114867	Pyruvaldehyde	Aldehyde,Ketones,Esters	Aldehydes	C3H4O2	138.971	72.0211	1.2474	[M-2H+3Na]+	8.325	3	0.8523	rp	78-98-8	880	HMDB0001167	6049	C00546	A	2629.93	2239.26	2291.74	1527.34	1347.96	1819.84	1316.63	1234.49	1268.14	ko00260,ko00620,ko00640,ko01100,ko05415
T3_positive	MW0110025	Triethyl citrate	Aldehyde,Ketones,Esters	Esters	C12H20O7	277.124	276.121	4.1717	[M+H]+	13.5416	1	0.7445	rp	77-93-0	6506	HMDB0034263	-	-	B	1749.89	1458.22	1655.51	980.072	2271.56	1704.26	2307.95	2262.63	2311.26	-
T3_positive	MW0108295	Methyl allophanate	Aldehyde,Ketones,Esters	Esters	C3H6N2O3	119.047	118.038	1.4489	[M+H]+	4.77594	2	0.7324	rp	761-89-7	12976	-	-	-	A	18410.5	19977.4	21498.8	18814.4	20428.8	21539.7	17065.4	16602.3	16289.4	-
T3_positive	MW0142836	3beta-Fluoro-5beta-pregnan-20-one	Aldehyde,Ketones,Esters	Ketones	C21H33FO	321.259	320.252	7.0311	[M+H]+	1.14	4	0.7223	rp	6943-62-0	244125	-	-	-	B	6983.3	6809.12	7096.42	4119.25	4440.27	3840.15	4590.5	4591.76	4555.93	-
T3_positive	MW0112967	4-(Methylnitrosamino)-1-(3-pyridyl)-1-butanone	Aldehyde,Ketones,Esters	Ketones	C10H13N3O2	453.162	207.101	6.6225	[2M+K]+	5.20782	3	0.798	rp	64091-91-4	47289	HMDB0011603	-	C16453	B	574512	571833	654641	464026	464717	416300	501143	509757	499878	ko00980,ko05204,ko05207,ko05208
T3_positive	MW0136999	7-hydroxy-3-(2-methoxyphenyl)-4H-chromen-4-one	Aldehyde,Ketones,Esters	Ketones	C16H12O4	268.073	268.074	2.1047	[M+]+	2.31678	2	0.7188	rp	63909-40-0	5397276	-	43943	-	B	2402.72	2691.03	3395.99	2518.06	2971.27	3170.89	3186.48	3182.49	3162.6	-
T3_positive	MW0127121	3-((2-Methyl-3-furyl)thio)-2-butanone	Aldehyde,Ketones,Esters	Ketones	C9H12O2S	223.018	184.056	4.4577	[M+K]+	0.499	4	0.9877	rp	61295-44-1	12980878	HMDB0032401	-	-	B	22437.6	19934.6	20066.9	15031.1	16946.3	19039.8	20844.4	20924.5	20539.5	-
T3_positive	MW0104247	1H,3H-Thieno[3,4-c]furan-1,3-dione	Aldehyde,Ketones,Esters	Ketones	C6H2O3S	154.975	153.972	0.0192	[M+H]+	1.33825	4	0.7176	rp	6007-85-8	315608	-	-	-	B	702.318	10827.4	519.734	771.767	1030.37	628.593	1202.7	1186.35	1226.04	-
T3_positive	MEDL02339	Diethyl hydrogen phosphate	Aldehyde,Ketones,Esters	Esters	C4H11O4P	177.031	154.04	1.4126	[M+Na]+	5.96626	1	0.7785	rp	598-02-7	654	HMDB0012209	-	C06608	A	17930	20558.9	19695.8	24135.8	4261.9	18681.5	19246.3	19816	19162.8	-
T3_positive	MW0121662	Nitrofurazone	Aldehyde,Ketones,Esters	Ketones	C6H6N4O4	199.049	198.039	3.3508	[M+H]+	4.92274	2	0.7758	rp	59-87-0	5447130	HMDB0014480	-	C08042	B	4502.26	3805.01	3818.05	3212.43	3750.02	3061.5	3242.01	3226.01	3304.84	-
T3_positive	MW0141271	11beta,17beta-Dihydroxy-9alpha-fluoro-17alpha-methyl-5alpha-androstan-3-one	Aldehyde,Ketones,Esters	Ketones	C20H31FO3	339.233	338.226	4.2493	[M+H]+	0.692	4	0.733	rp	51773-60-5	236179	-	-	-	B	4428.66	5103.48	5187.17	4195.4	5766.97	4609.23	5098.3	5032.34	5077.24	-
T3_positive	MEDN1105	N-[(3S)-Tetrahydro-2-oxo-3-furanyl]octadecanamide	Aldehyde,Ketones,Esters	Esters	C22H41NO3	368.309	367.309	6.018	[M+H]+	18.1193	2	0.8528	rp	479050-96-9	69757690	-	-	-	B	24272.2	19957.9	27863.2	12046.4	17725.8	25284.8	21684.8	21747	21746.3	-
T3_positive	MEDP1836	Nootkatone	Aldehyde,Ketones,Esters	Ketones	C15H22O	219.171	218.167	6.7662	[M+H]+	6.82364	1	0.879	rp	4674-50-4 | 28834-25-5	1268142	-	-	C17914	B	7820.93	7030.88	8136.34	6134.65	6940.97	7215.04	6972.85	7030.63	7014.51	-
T3_positive	MW0015448	Isoflupredone	Aldehyde,Ketones,Esters	Ketones	C21H27FO5	379.189	378.184	3.0803	[M+H]+	9.3023	2	0.8432	rp	338-95-4	127516	-	-	-	B	1170.92	1484.78	957.191	889.851	1489.98	1037.64	2020.95	2070.48	2036.18	-
T3_positive	MW0119160	3',4'-(Methylenedioxy)acetophenone	Aldehyde,Ketones,Esters	Ketones	C9H8O3	203.011	164.047	1.5795	[M+K]+	0.880097	2	0.7238	rp	3162-29-6	76622	-	263512	-	B	4686.89	3133.99	5382.14	3874.52	4452.83	3674.25	5174.39	5174.02	5173.81	-
T3_positive	MW0007841	Monoisobutyl phthalate	Aldehyde,Ketones,Esters	Esters	C12H14O4	223.091	222.089	5.7453	[M+H]+	13.2633	1	0.764	rp	30833-53-5	92272	HMDB0002056	-	-	B	627.118	394.249	750.97	493.059	733.061	601.515	1491.53	1504.3	1484.46	-
T3_positive	MW0127054	xi-5-Dodecanolide	Aldehyde,Ketones,Esters	Esters	C12H22O2	181.156	198.162	6.8965	[M+H-H2O]+	2.45324	2	0.7346	rp	3051-22-7	12844	HMDB0037742	-	-	B	1998.29	1850.52	1865.83	891.666	1468.69	614.94	1558.09	1584.39	1559.61	-
T3_positive	MW0113926	Aminoacetone	Aldehyde,Ketones,Esters	Ketones	C3H7NO	56.0486	73.0528	0.8676	[M+H-H2O]+	2.15	3	0.8512	rp	298-08-8	215	HMDB0002134	6502	C01888	A	23571.8	15287.1	14865.7	11161.9	15428.2	14081.7	15027.2	15190	14762	ko00260,ko01100
T3_positive	MW0010894	(1S,4R)-1,7,7-trimethylbicyclo[2.2.1]heptane-2,3-dione	Aldehyde,Ketones,Esters	Ketones	C10H14O2	189.094	166.099	0.5864	[M+Na]+	14.9275	2	0.7679	rp	2767-84-2	1549179	-	-	-	B	6729.98	5970.24	7739.08	5261.59	5589.67	6718.78	5559.09	5630.36	5512.38	-
T3_positive	MW0014440	4-Chlorodehydromethyltestosterone	Aldehyde,Ketones,Esters	Ketones	C20H27ClO2	335.181	334.17	6.7396	[M+H]+	10.8105	2	0.7658	rp	2446-23-3	98521	HMDB0004634	-	-	B	57568.8	53863.4	67725	42430.3	66209.6	53715.1	44472.9	45599.6	45219.5	-
T3_positive	MW0148557	(Carboxymethyl)(dimethyl)sulfonium	Aldehyde,Ketones,Esters	Esters	C4H9O2S+	144.019	121.032	0.5864	[M+Na]+	0.81325	4	0.7301	rp	24220-08-4	160766	-	-	C03392	B	211335	199740	222064	179403	171405	220276	203246	204235	203227	-
T3_positive	MW0014685	5alpha-Androstane-3alpha,17beta-diol disulfate	Aldehyde,Ketones,Esters	Esters	C19H32O8S2	470.187	452.154	1.4676	[M+NH4]+	0.310514	4	0.7423	rp	21152-49-8	56639109	HMDB0094682	-	-	B	1229.56	1206.4	1020.8	1604.79	1819.82	1594.56	1742.2	1731.05	1730.78	-
T3_positive	MW0049148	Cyproterone	Aldehyde,Ketones,Esters	Ketones	C22H27ClO3	375.173	374.165	6.7299	[M+H]+	5.44037	2	0.8828	rp	2098-66-0	5284537	HMDB0015587	-	-	B	32855.3	32892.3	21635.5	21452.6	42803.1	28793.1	23460.7	24291.6	24393	-
T3_positive	MW0127419	Butylate	Aldehyde,Ketones,Esters	Esters	C11H23NOS	235.187	217.15	5.6946	[M+NH4]+	7.74683	2	0.7332	rp	2008-41-5	16181	-	-	-	B	392.007	907.809	1593.53	1107.74	1451.6	1552.61	2736.37	2709.95	2766.73	-
T3_positive	MW0113918	alpha-Pyrrolidinopropiophenone	Aldehyde,Ketones,Esters	Ketones	C13H17NO	221.154	203.131	5.9179	[M+NH4]+	13.9465	2	0.7047	rp	19134-50-0	209045	-	85090	-	B	3267.86	2961.16	3348	3663.47	1015.56	2421.77	1596.94	1861.99	1719.01	-
T3_positive	MW0144149	9alpha-Fluoro-11beta-hydroxy-16alpha-methylandrosta-1,4-diene-3,17-dione	Aldehyde,Ketones,Esters	Ketones	C20H25FO3	333.184	332.179	3.4773	[M+H]+	5.96053	2	0.898	rp	1880-61-1	242348	-	-	-	B	4784.26	4745.47	2993.07	2681.29	4781.21	2671.88	4742.6	4726.04	4746.14	-
T3_positive	MW0168300	MAFP cpd	Aldehyde,Ketones,Esters	Esters	C21H36FO3P	409.225	386.239	6.532	[M+Na]+	0.974	4	0.7262	rp	180509-15-3	25021170	-	63064	-	B	25426.1	11970.6	17541.2	16305	8256.1	20222.6	13647.9	14941.3	15164.8	-
T3_positive	MW0148806	D-Xylono-1,4-lactone	Aldehyde,Ketones,Esters	Esters	C5H8O5	217.032	148.037	7.5379	[M+Na+HCOOH]+	0.65	3	0.9205	rp	15384-37-9 | 18423-66-0	439799	-	-	C02753	B	54337.2	49939.2	56346.6	38772.6	37675.4	23764.4	24499.2	24395.2	23620.5	ko00040,ko01100
T3_positive	MEDP0594	Dihydroactinidiolide	Aldehyde,Ketones,Esters	Esters	C11H16O2	181.12	180.115	6.6165	[M+H]+	6.87644	1	0.7316	rp	15356-74-8	27209	HMDB0035240	-	-	B	5514.86	5024.89	3872.43	2205.55	5166.43	2585.18	3796.41	3841.66	3800.53	-
T3_positive	MW0114564	Glycolaldehyde	Aldehyde,Ketones,Esters	Aldehydes	C2H4O2	61.0274	60.0211	1.4766	[M+H]+	2.575	3	0.9193	rp	141-46-8	756	HMDB0003344	3205	C00266	A	277980	238133	286525	108935	82658.3	244154	192313	176759	183769	ko00040,ko00630,ko00750,ko00790,ko01100
T3_positive	MW0125244	Mycophenolate mofetil	Aldehyde,Ketones,Esters	Esters	C23H31NO7	472.18	433.21	5.2532	[M+K]+	16.5165	1	0.7424	rp	128794-94-5	5281078	HMDB0014826	-	C07908	B	862.598	1336.03	1740.6	698.456	2119.67	2332.8	1748.03	1578.89	1644.81	-
T3_positive	MW0119723	3'-N'-Acetylfusarochromanone	Aldehyde,Ketones,Esters	Ketones	C17H22N2O5	335.164	334.153	2.9364	[M+H]+	5.96292	2	0.8158	rp	120976-97-8	102571616	HMDB0037499	-	-	B	2378.96	2351.78	2728.03	2008.5	2738.51	1214.05	2840.05	2868.52	2844.56	-
T3_positive	MW0006368	Bis(2-ethylhexyl) phthalate	Aldehyde,Ketones,Esters	Esters	C24H38O4	391.279	390.277	8.3758	[M+H]+	13.699	1	0.8922	rp	117-81-7 | 15495-94-0 | 8033-53-2 | 50885-87-5 | 82208-43-3	8343	-	263643	C03690	B	251170	142235	216383	152372	59428.8	45567.3	71077.1	61716.3	64155.6	ko05207
T3_positive	MW0012609	17alpha,21-Dihydroxypregnenolone	Aldehyde,Ketones,Esters	Ketones	C21H32O4	433.201	348.23	7.0485	[M+K+HCOOH]+	4.87074	3	0.8375	rp	1167-48-2	192735	HMDB0006762	-	C05487	B	16305.4	11930.1	18327.8	9606.59	13833.4	10345.8	7358.62	7656.81	7511.97	ko00140
T3_positive	MW0123909	Ethyl 1-cyclopropyl-6,7-difluoro-8-methoxy-4-oxo-1,4-dihydroquinoline-3-carboxylate	Aldehyde,Ketones,Esters	Esters	C16H15F2NO4	362.06	323.097	5.0841	[M+K]+	0.21375	4	0.7447	rp	112811-71-9	10758239	-	-	-	B	1302.18	2979.95	725.1	586.771	4761.52	2493.3	1011.36	1038.68	1101.11	-
T3_positive	MW0052341	Diethyl sebacate	Aldehyde,Ketones,Esters	Esters	C14H26O4	223.169	258.183	6.7392	[M+H-2H2O]+	15.7393	2	0.725	rp	110-40-7	8049	HMDB0040429	-	-	B	13908.4	12905.6	10904.9	5926.79	14233.7	8621.72	4565.77	4792.02	4809	-
T3_positive	MW0052578	Eplerenone	Aldehyde,Ketones,Esters	Ketones	C24H30O6	432.233	414.204	6.641	[M+NH4]+	9.24817	1	0.7466	rp	107724-20-9	443872	HMDB0014838	-	C12512	B	562418	600025	616829	457161	405952	374202	484242	490362	490575	-
T3_positive	MW0016201	Bis(2-ethylhexyl) adipate	Aldehyde,Ketones,Esters	Esters	C22H42O4	371.315	370.308	6.5502	[M+H]+	4.87355	1	0.7006	rp	103-23-1	7641	HMDB0040270	-	C14240	A	16903.2	11927.1	6403.33	14653.4	19411.8	26381	10350.5	10853.4	10942	ko05207
T3_positive	MW0110038	TRIPHENYL PHOSPHATE	Aldehyde,Ketones,Esters	Esters	C18H15O4P	327.074	326.071	7.0311	[M+H]+	8.55779	1	0.8994	rp	-	8289	HMDB0259262	-	C14235	B	7803.84	7926.84	9480.09	4968.59	6584.2	5449.46	4526.04	4682.41	4684.62	-
T3_positive	MW0110042	Tris(2-butoxyethyl) phosphate	Aldehyde,Ketones,Esters	Esters	C18H39O7P	421.227	398.243	7.2582	[M+Na]+	13.8138	2	0.9034	rp	-	6540	HMDB0259275	-	C14446	A	14199.9	12599.8	15382	6392.07	6417.76	6546.61	7973.45	8220.57	7019.52	-
T3_positive	MW0110044	Tris(2-chloroethyl) phosphate	Aldehyde,Ketones,Esters	Esters	C6H12Cl3O4P	306.939	283.954	5.6541	[M+Na]+	11.9206	2	0.8739	rp	-	8295	HMDB0259276	-	C14445	B	3755.34	2647.42	4651.63	2603.5	2031.51	4960.01	2391.92	2220.22	2114.47	-
T3_positive	MW0148636	DMABA-d10 NHS ester	Aldehyde,Ketones,Esters	Esters	C13H14N2O4	273.164	262.095	4.7499	[M+H]+	5.54094	2	0.8725	rp	-	131866485	-	96493	-	B	6832.1	5837.13	6064.45	4588.61	5508.23	5484.33	6599.48	6937.26	6928.64	-
T3_positive	MW0116753	1-[(1S,5R)-9-methyl-9-azabicyclo[3.3.1]nonan-3-yl]-3H-indol-2-one	Aldehyde,Ketones,Esters	Ketones	C17H22N2O	271.185	270.173	6.3195	[M+H]+	13.322	2	0.8456	rp	-	49840264	-	96438	-	B	7712.25	8422.82	7994.22	5544.09	7042.05	6843.89	10685.5	10628.3	10604.4	-
T3_positive	MW0137085	7-Hydroxywarfarin	Aldehyde,Ketones,Esters	Ketones	C19H16O5	307.093	324.1	5.8914	[M+H-H2O]+	10.9944	2	0.7794	rp	-	54682507	HMDB0243667	-	-	B	5739.31	6122.76	5453.69	4140.15	5588.27	5406.2	5801.64	5619.85	5822.1	-
T3_positive	MW0112973	4-(Nitrosoamino)-1-(3-pyridinyl)-1-butanone	Aldehyde,Ketones,Esters	Ketones	C9H11N3O2	387.178	193.085	6.3197	[2M+H]+	0.85	3	0.9853	rp	-	53297438	HMDB0062376	-	C19564	B	3050.04	2095.5	2154.77	1746.06	889.415	1325.23	2367.25	1926.28	2258.36	ko00980,ko05204
T3_positive	MW0013219	20-Dihydrodydrogesterone	Aldehyde,Ketones,Esters	Ketones	C23H34	311.267	310.266	6.8897	[M+H]+	12.4049	3	0.8577	rp	-	131769931	HMDB0060729	-	-	B	37283.7	32734.4	22137.6	13599.5	52932.2	35752	15917.9	12025.7	15643	-
T3_positive	MW0162064	15-Hydroxysolavetivone	Aldehyde,Ketones,Esters	Ketones	C15H22O2	235.168	234.162	4.9557	[M+H]+	2.2	3	0.8485	rp	-	25200393	-	-	-	B	8940.89	7620.54	2977.2	2814.96	700.882	2097.59	1492.07	1585.79	1415.07	-
T3_positive	MW0014120	3-Hydroxysintaxanthin	Aldehyde,Ketones,Esters	Ketones	C31H42O2	429.313	446.318	7.7817	[M+H-H2O]+	7.91646	3	0.8279	rp	-	131751826	HMDB0035641	-	-	B	17208.3	17968.3	17580.4	10159.5	12079	12145.9	9575.61	9461.15	9561.31	-
T3_positive	MW0161663	(8R,10S,13S)-13-methyl-3,17-dioxo-2,6,7,8,9,11,12,14,15,16-decahydro-1H-cyclopenta[a]phenanthrene-10-carbaldehyde	Aldehyde,Ketones,Esters	Aldehydes	C19H24O3	364.187	300.173	6.2226	[M+CH3CN+Na]+	4.35	3	0.8191	rp	-	16399653	HMDB0006768	-	C05297	B	3703.44	2036.72	2458.14	2334.05	2539.08	2485.07	2651.44	2687.15	2647.91	ko00140,ko01100
T3_positive	MW0015132	7',8'-Dihydro-8'-hydroxyreticulataxanthin	Aldehyde,Ketones,Esters	Ketones	C33H46O3	473.338	490.345	7.7787	[M+H-H2O]+	3.0093	3	0.8175	rp	-	131752545	HMDB0039090	-	-	B	10666.1	12004.6	11767.6	7356.6	7843.92	7443.38	7633.88	7652.87	7563.38	-
T3_positive	MW0160471	2-Oxonioacetate	Aldehyde,Ketones,Esters	Esters	C2H4O3	145.006	76.016	1.1033	[M+Na+HCOOH]+	11.075	3	0.7576	rp	-	3698251	-	-	-	B	580570	546459	383444	139910	328953	408817	341236	316897	323083	-
T3_positive	ZINC85541858	welforlide B	Aldehyde,Ketones,Esters	Ketones	C30H44O3	475.32	452.329	3.7159	[M+Na]+	2.11041	4	0.9499	rp	-	90476631	-	-	-	B	112370	105298	104590	94967.4	100215	109306	109961	109697	109600	-
T3_positive	MW0107825	Leukotriene D4 methyl ester	Aldehyde,Ketones,Esters	Esters	C26H42N2O6S	511.282	510.276	6.2218	[M+H]+	2.66131	4	0.9377	rp	-	71684544	-	45049	-	B	37963.1	32621.6	33904.6	25314.3	30383.5	30020.4	29335.5	29562.8	29390	-
T3_positive	MW0143742	6,8a-Seco-6,8a-deoxy-5-oxoavermectin''1b'' aglycone	Aldehyde,Ketones,Esters	Ketones	C33H46O7	593.282	554.324	6.2218	[M+K]+	13.2668	4	0.7576	rp	-	5282007	-	-	-	B	6249.02	4607.8	5728.68	3634.49	4786.83	4630.73	4517.75	4440.28	4434.52	-
T3_positive	MW0144917	alpha,alpha'-Trehalose 6-mycolate	Aldehyde,Ketones,Esters	Esters	C44H82O13	819.586	818.576	6.2218	[M+H]+	0.66347	4	0.7337	rp	-	44176383	-	-	C04218	B	2377.81	611.211	1890.62	615.301	3660.7	877.228	3634.36	3670.13	3558.36	-
T3_positive	MW0014991	6-beta-Hydroxy-mometasone furoate	Aldehyde,Ketones,Esters	Esters	C27H30Cl2O7	537.143	536.137	8.4449	[M+H]+	1.60202	4	0.7115	rp	-	131769950	HMDB0060783	-	-	B	3771.97	4455.44	4193.5	1361.1	3036.99	250.412	14123.8	14214.1	13497	-
T3_positive	MW0152151	Laurencione diacetate	Aldehyde,Ketones,Esters	Ketones	C9H12O5	223.061	200.069	7.7583	[M+Na]+	9.00997	2	0.7369	rp	-	-	-	65391	-	B	30000.6	3766.07	18416.7	19128.4	1840.03	14971.2	20931.2	20258.1	21006	-
T3_positive	MW0011176	(3beta,17alpha,23S,24S)-17,23-Epoxy-3,24,29-trihydroxy-27-norlanost-8-en-15-one	Aldehyde,Ketones,Esters	Ketones	C29H46O5	457.318	474.334	6.7299	[M+H-H2O]+	22.5482	3	0.7307	rp	-	131751674	HMDB0035144	-	-	B	17994.9	16570.5	17757.5	13723.3	14711.4	15376.4	14779.1	14792.8	14711.6	-
T3_positive	ZINC95914198	3alpha-Hydroxy-28-noroleana-11,13(18),17(22)-triene-21-one	Aldehyde,Ketones,Esters	Ketones	C29H42O2	440.353	422.318	7.2758	[M+NH4]+	1.13824	4	0.9723	rp	-	102588575	-	-	-	B	20904.3	21070.4	22578.5	16218	17121.1	15178.1	16233.7	16433.2	16223.9	-
T3_negative	MW0114275	Dihydroxyacetone	Aldehyde,Ketones,Esters	Ketones	C3H6O3	71.0145	90.0317	0.9548	[M-H2O-H]-	1.775	3	0.7599	rp	96-26-4	670	HMDB0001882	6368	C00184	A	1182.96	790.017	1086.27	2441.11	1128.3	1719.01	1818.76	2117.58	1899.8	ko00561,ko01100,ko01200
T3_negative	MW0108755	1-Methyl-3-(1-methyl-1H-indol-3-yl)-4-(pentylamino)-1H-pyrrole-2,5-dione	Aldehyde,Ketones,Esters	Ketones	C19H23N3O2	324.18	325.179	5.3625	[M-H]-	9.74555	2	0.7321	rp	861891-50-1	16760577	-	45536	-	B	6709.27	5282.27	5891.81	7269.58	6120.78	6042.03	8967.22	9058.1	8875.19	-
T3_negative	MW0126682	Tert-butyl 3-bromopiperidine-1-carboxylate	Aldehyde,Ketones,Esters	Esters	C10H18BrNO2	262.05	263.052	2.0898	[M-H]-	0.225	4	0.7444	rp	849928-26-3	51051593	-	-	-	B	895.951	2107.6	1833.96	1540.9	2124.18	1853.06	2002.87	1998.82	2048.18	-
T3_negative	MW0117424	2-(2,5-Dichlorophenyl)-5-methyl-1H-pyrazol-3(2H)-one	Aldehyde,Ketones,Esters	Ketones	C10H8Cl2N2O	240.996	242.001	1.5521	[M-H]-	0.921	4	0.7275	rp	692273-24-8	4743273	-	-	-	B	13466.4	11573.8	14696.1	7034.95	12362.4	12413.5	7898.76	6600.2	7535.58	-
T3_negative	ZINC150352601	Bassianolide	Aldehyde,Ketones,Esters	Esters	C48H84N4O12	943.575	908.609	6.2022	[M+Cl]-	3.77004	4	0.9141	rp	64763-82-2	89254632	-	-	-	B	18516	18408.7	18161.8	16001.9	9489.63	17207	16291.6	16303.5	16047.4	-
T3_negative	MW0112223	2-Methylcyclohexanone	Aldehyde,Ketones,Esters	Ketones	C7H12O	157.088	112.089	4.7023	[M+HCOO]-	1.60693	3	0.7945	rp	583-60-8	11419	HMDB0031539	-	-	B	3752.28	3391.77	3806.74	3669.7	3774.3	3951.82	3984.33	4028.89	3881.44	-
T3_negative	MEDL02760	Glyceraldehyde	Aldehyde,Ketones,Esters	Aldehydes	C3H6O3	89.0257	90.0317	1.3886	[M-H]-	4.41593	1	0.8058	rp	56-82-6	751	HMDB0001051	-	C02154	A	290389	241647	255842	227267	201192	313355	265835	269575	266027	-
T3_negative	MW0146839	Bowdichione	Aldehyde,Ketones,Esters	Ketones	C16H10O6	297.048	298.048	6.891	[M-H]-	11.442	3	0.7294	rp	53774-75-7	5281705	-	-	-	B	3602.12	4069.45	4064.63	4014.34	3301.95	3144.05	15636.2	15681	15976.5	-
T3_negative	MW0052918	Fludrocortisone acetate	Aldehyde,Ketones,Esters	Esters	C23H31FO6	403.2	422.211	5.0907	[M-H2O-H]-	14.1857	1	0.7279	rp	514-36-3	225609	-	4029	C08186	B	1160.16	1718.29	2339.83	462.835	1152.56	1535.38	1510.2	1608.03	1435.07	-
T3_negative	MW0139217	Osthenol	Aldehyde,Ketones,Esters	Ketones	C14H14O3	229.09	230.094	6.3376	[M-H]-	9.12079	2	0.7803	rp	484-14-0	5320318	HMDB0034130	-	C18080	B	11152.6	2257.89	9786.77	10215.8	10291.8	10905.5	9794.52	9684.22	9790.22	-
T3_negative	MW0122088	6-Chloro-7-{[2-(morpholin-4-yl)ethyl]amino}quinoline-5,8-dione	Aldehyde,Ketones,Esters	Ketones	C15H16ClN3O3	320.081	321.088	4.4632	[M-H]-	2.85146	2	0.7591	rp	383907-43-5	379077	-	45526	-	B	6293.64	7697.07	7384.19	1752.8	2841.73	7459.34	5485.83	5475.32	5044.18	-
T3_negative	MW0052666	Estrone glucuronide	Aldehyde,Ketones,Esters	Ketones	C24H30O8	445.187	446.194	5.8903	[M-H]-	1.34381	2	0.7924	rp	2479-90-5	115255	HMDB0004483	7063	C11133	B	3523.91	3814.42	3543.42	5277.61	4669.65	5039.87	6247.35	5426.23	5840.73	ko00140
T3_negative	MW0115357	Theaspirone A	Aldehyde,Ketones,Esters	Ketones	C13H20O2	207.14	208.146	6.4429	[M-H]-	2.16135	3	0.807	rp	24399-19-7	5321925	HMDB0035228	-	-	B	2635.72	2748.47	2301.22	2532.61	2475.39	2584.05	2760.78	2846.76	2839.22	-
T3_negative	MW0125802	Nifenazone	Aldehyde,Ketones,Esters	Ketones	C17H16N4O2	307.128	308.127	2.3792	[M-H]-	14.0312	2	0.742	rp	2139-47-1	4487	-	-	-	B	77317.7	72576.6	73224.4	66159.1	63491.6	67970.9	69566.6	69500	69507.8	-
T3_negative	MW0107224	Acetic acid trans-2-hepten-1-YL ester	Aldehyde,Ketones,Esters	Esters	C9H16O2	155.109	156.115	6.3772	[M-H]-	4.00248	3	0.8558	rp	16939-73-4	5363203	HMDB0032307	-	-	B	1699.91	2083.81	1988.07	750.525	1683.11	1495.83	2926.75	2924.71	2871.47	-
T3_negative	MW0115454	Valeraldehyde dibutyl acetal	Aldehyde,Ketones,Esters	Aldehydes	C13H28O2	215.199	216.209	7.6232	[M-H]-	10.694	3	0.8293	rp	13112-65-7	22011445	HMDB0032550	-	-	B	60888.2	54334.8	49398.5	9799.79	50932.5	44913.6	57114.3	60221.8	60714.1	-
T3_negative	MW0052740	Ethyl tetradecanoate	Aldehyde,Ketones,Esters	Esters	C16H32O2	315.255	256.24	6.8229	[M+CH3COO]-	11.4166	2	0.7471	rp	124-06-1	31283	HMDB0034153	-	-	B	2620.82	4283.64	6011.21	3640.92	3378.95	4365.68	2813.56	3086.22	3308.47	-
T3_negative	MW0010090	Zingerone	Aldehyde,Ketones,Esters	Ketones	C11H14O3	193.091	194.094	5.6754	[M-H]-	9.23837	1	0.7146	rp	122-48-5	31211	HMDB0032590	-	C17497	B	4840.26	4689.72	4540.06	3971.44	3451.81	4131.03	5504.55	5488.19	5504.79	-
T3_negative	MW0109429	Dimethyl 2-(3-oxocyclohexyl)propanedioate	Aldehyde,Ketones,Esters	Esters	C11H16O5	227.093	228.1	4.5068	[M-H]-	2.01137	3	0.7456	rp	1113-13-9	358296	HMDB0032496	-	-	B	3162.5	3784.84	3761.98	2652.82	4804.67	1966.35	3287.42	3001.26	3234.03	-
T3_negative	MEDL00401	Confertifoline	Aldehyde,Ketones,Esters	Esters	C15H22O2	233.156	234.162	7.1579	[M-H]-	3.78081	1	0.9614	rp	-	435751	-	-	-	B	11899.1	10108.6	7936.56	13008.8	11382.3	14520.7	15096.8	14851.9	15084.5	-
T3_negative	MW0108336	Meldonium	Aldehyde,Ketones,Esters	Esters	C6H14N2O2	191.109	146.106	6.2499	[M+HCOO]-	14.1087	2	0.8692	rp	-	123868	HMDB0254733	-	-	B	3736.98	4003.33	2987.46	1135.81	3589.14	3234.19	4239.4	4241.06	4179.01	-
T3_negative	MW0137929	Deoxysappanone B 7,3'-dimethyl ether	Aldehyde,Ketones,Esters	Ketones	C18H18O5	313.109	314.115	4.4413	[M-H]-	0.759249	2	0.791	rp	-	16667741	-	43628	-	B	38980.7	24677.8	36258.9	29778.5	32060.6	31831.7	28570.2	28984.2	25948.4	-
T3_negative	MW0139654	Sappanone A dimethyl ether	Aldehyde,Ketones,Esters	Ketones	C18H16O5	311.101	312.1	7.9637	[M-H]-	19.8903	2	0.749	rp	-	5946498	-	44084	-	B	7513.58	9588.43	9263.42	9490.99	3674.18	11233.5	18598.3	19363.9	18712.7	-
T3_negative	MW0147548	cis-4,10-13,16-Docosatetraenoic Acid methyl ester	Aldehyde,Ketones,Esters	Esters	C23H38O2	345.279	346.287	5.8146	[M-H]-	6.89124	2	0.7161	rp	-	137701031	-	44959	-	B	2721.63	3733.48	4442.83	3702.05	2572.74	3710.04	3498.98	3734.45	3551.38	-
T3_negative	MW0139983	Yuzu-Lactone	Aldehyde,Ketones,Esters	Esters	C12H20O2	195.14	196.146	6.6178	[M-H]-	2.38237	3	0.9441	rp	-	10878079	HMDB0032901	-	-	B	36460.7	34828	25702.1	13731.2	36005	14012.9	35566	33513.2	34948.5	-
T3_negative	MW0106047	Biuret	Aldehyde,Ketones,Esters	Ketones	C2H5N3O2	102.028	103.038	1.5496	[M-H]-	6.7	3	0.7675	rp	-	7913	HMDB0249282	-	C06555	B	2341.9	2388.14	2476.65	2325.69	2196.49	2907.88	2248.56	2279.2	2332.16	ko01100
T3_negative	MW0142373	2-Hydroxy-5-(methylsulfanyl)-3-oxopent-1-enyl phosphate	Aldehyde,Ketones,Esters	Esters	C6H11O6PS	301.012	242.001	1.5521	[M+CH3COO]-	0.658909	3	0.732	rp	-	5462148	-	-	-	B	22296.5	22236	18622.5	16794.3	16545.7	17561	18759.6	18768.9	18629.5	-
T3_negative	MW0143248	4-Amino-4-deoxychorismic acid	Aldehyde,Ketones,Esters	Esters	C10H11NO5	284.073	225.064	2.0932	[M+CH3COO]-	15.9631	3	0.7237	rp	-	443142	HMDB0304170	-	C11355	B	4747.1	4573.29	4337.46	4275.61	4395.24	4981.91	4437.07	4391.32	4379.3	ko00790,ko01240
T3_negative	MW0136939	7-chloro-2-(3,4-dimethoxyphenyl)-3,5,8-trihydroxy-6-methoxy-4H-chromen-4-one	Aldehyde,Ketones,Esters	Ketones	C18H15ClO8	393.048	394.046	5.0529	[M-H]-	11.7398	3	0.7024	rp	-	131839338	HMDB0135843	-	-	B	2981.94	4742.84	4427.23	2745.48	5787.97	5244.13	4683.63	4796.02	4787.88	-
HILIC_negative	MW0016356	Canrenone	Aldehyde,Ketones,Esters	Ketones	C22H28O3	339.2	340.204	0.7819	[M-H]-	9.48556	1	0.8661	hilic	976-71-6	13789	HMDB0003033	-	-	B	59952	42759.1	33106.4	33228.3	35826.7	31899.7	48775	48722.1	49586.2	-
HILIC_negative	MW0161258	Glycochenodeoxycholate (1-)	Aldehyde,Ketones,Esters	Esters	C26H42NO5-	483.274	448.306	0.8704	[M+Cl]-	1.56455	4	0.9624	hilic	640-79-9	9548796	-	-	-	B	22835.8	24688.6	23278.8	17836.7	19777.3	31781.2	21380.3	20812.6	21349.5	-
HILIC_negative	MW0017075	Cholesta-4,6-dien-3-one	Aldehyde,Ketones,Esters	Ketones	C27H42O	381.324	382.324	1.0062	[M-H]-	14.3292	3	0.8942	hilic	566-93-8	3034666	HMDB0002394	6663	-	B	21152.2	11214.8	19684.9	10884.5	9213.71	15249.9	11902.3	11307.8	11827.7	-
HILIC_negative	MW0141191	1,8-Diazacyclotetradecane-2,9-dione	Aldehyde,Ketones,Esters	Ketones	C12H22N2O2	271.166	226.168	1.105	[M+HCOO]-	2.71183	3	0.8145	hilic	56403-09-9	16	HMDB0033567	-	C04277 | C20990	A	9167.09	25872	8547.27	7052.17	7924.18	27092.4	6845.02	6964.9	6976.42	-
HILIC_negative	MW0052653	Estradiol acetate	Aldehyde,Ketones,Esters	Esters	C20H26O3	313.185	314.188	6.6406	[M-H]-	11.557	2	0.7219	hilic	4245-41-4	9818306	-	43499	-	B	8083.63	8518.56	8654.61	8081.84	8748.33	7833.29	7647.79	7666.7	7648.9	-
HILIC_negative	MW0106387	Dexrazoxane	Aldehyde,Ketones,Esters	Ketones	C11H16N4O4	303.081	268.117	1.8269	[M+Cl]-	15.8766	1	0.7381	hilic	24584-09-6	71384	HMDB0014524	-	-	B	2684.27	1442.44	1945.79	3757.15	3810.85	3890.47	2503.13	2255.58	2514.35	-
HILIC_negative	MW0011495	(all-E)-6'-Apo-y-caroten-6'-al	Aldehyde,Ketones,Esters	Aldehydes	C32H42O	441.316	442.324	1.0953	[M-H]-	1.88479	3	0.7835	hilic	22255-36-3	20055192	HMDB0040118	-	-	B	152927	156729	159528	133462	123179	159464	132439	135022	129650	-
HILIC_negative	MW0015674	alpha-Amyrin palmitate	Aldehyde,Ketones,Esters	Esters	C46H80O2	709.611	664.616	0.7819	[M+HCOO]-	1.28728	3	0.7138	hilic	22255-10-3	10394654	HMDB0036660	-	-	B	48597.7	47521.7	39189.6	39558.5	34152.5	42375.9	32595.2	32002.9	32555	-
HILIC_negative	MW0114341	Dodecanal dimethyl acetal	Aldehyde,Ketones,Esters	Aldehydes	C14H30O2	229.215	230.225	0.8808	[M-H]-	4.99065	3	0.9331	hilic	14620-52-1	84559	HMDB0032246	-	-	B	80585.7	73960	81620.3	69674.4	73829.3	85177.2	70934.4	70928.1	71260.3	-
HILIC_negative	MW0117118	3-(2,4-Dichlorophenyl)-4-(1-methyl-1H-indol-3-yl)-1H-pyrrole-2,5-dione	Aldehyde,Ketones,Esters	Ketones	C19H12Cl2N2O2	369.022	370.028	4.5173	[M-H]-	0.0680462	2	0.887	hilic	-	176158	HMDB0245731	-	-	B	17922.4	8518.88	6673.04	4459.78	4589.49	16684.5	9617.97	9867.58	9847.58	-
HILIC_negative	MW0115674	Chloroacetyl chloride	Aldehyde,Ketones,Esters	Ketones	C2H2Cl2O	92.9276	111.948	1.6404	[M-H2O-H]-	3.98745	3	0.7271	hilic	-	6577	HMDB0060452	-	C14859	B	1257.68	1513.31	1416.98	997.592	783.248	1793.3	2076.68	2213.99	2011.32	ko00980
T3_positive	MW0000457	Tetrahydroalstonine	Alkaloids	Alkaloids	C21H24N2O3	353.191	352.179	6.7428	[M+H]+	15.4953	2	0.7148	rp	83-45-4	72340	HMDB0000494	-	C11682	B	29675.9	29045.1	37469.7	22555.7	34390.5	28853.5	24747	25301.2	25290.9	-
T3_positive	MW0000273	Harmaline	Alkaloids	Alkaloids	C13H14N2O	215.123	214.111	3.3147	[M+H]+	10.0747	1	0.7166	rp	304-21-2	3564	HMDB0030310	-	C06536	B	10447.1	10631.3	9435.25	6294.05	8697.24	8403.05	13462.9	13541.6	13578.6	-
T3_positive	MW0000171	Catharanthine	Alkaloids	Alkaloids	C21H24N2O2	337.194	336.184	5.7315	[M+H]+	6.4656	1	0.9175	rp	2468-21-5	5458190	-	-	-	B	34128.1	33559.1	32814.3	27501.7	28748.1	30340.5	31375	31374.7	31420.7	-
T3_positive	MW0154873	(1R,6R,11S,13S,14R,21R)-7,19,23-triazahexacyclo[9.9.1.11,13.12,6.07,21.014,19]tricosane	Alkaloids	Alkaloids	C20H33N3	316.281	315.267	5.7147	[M+H]+	13.5122	3	0.7226	rp	2448-27-3	476521	-	-	-	B	2937.47	3456.01	2812.62	1183.51	3060.24	3249.96	3253.07	3253.27	3266.17	-
T3_positive	MW0059173	Peimine	Alkaloids	Alkaloids	C27H45NO3	414.318	431.34	6.2037	[M+H-H2O]+	5.02312	1	0.7979	rp	23496-41-5 | 107299-20-7 | 135636-54-3	131900	-	-	-	B	17590.3	12404.6	16882.7	15004.2	14265.7	15298.6	15811.9	16086.4	15938.4	-
T3_positive	MEDL02681	6-Deoxyfagomine	Alkaloids	Alkaloids	C6H13NO2	132.099	131.095	0.9298	[M+H]+	6.97024	1	0.8598	rp	197449-09-5	57449463	HMDB0036382	-	-	B	34178.5	17097.8	37621	9869.58	37752.3	25186.2	31674	31246.4	31859.6	-
T3_positive	MW0000334	Ecgonine methyl ester	Alkaloids	Tropan alkaloids	C10H17NO3	244.091	199.121	6.3407	[M-H+2Na]+	3.35	3	0.8597	rp	1915211	104904	-	-	-	B	18313.7	15669.6	17378.3	12006.9	15321	16798.1	15646	15813.1	15808.1	-
T3_positive	MW0000390	Oxymatrine	Alkaloids	Alkaloids	C15H24N2O2	247.175	264.184	6.24	[M+H-H2O]+	12.5399	1	0.8507	rp	16837-52-8 | 54809-74-4	114850	-	-	-	B	106897	99008.3	109835	93697.5	90384.5	98335.2	93640.3	94289.4	94425.3	-
T3_positive	MEDL02028	Spermidine	Alkaloids	Phenolamine	C7H19N3	146.163	145.158	0.6405	[M+H]+	3.59679	1	0.9773	rp	124-20-9	1102	HMDB0001257	254	C00315	A	69386.9	55735.4	60956.2	43385.2	47411.3	56748.9	51058.7	51125.3	51095.7	ko00330,ko00410,ko00480,ko01100,ko02010,ko04976
T3_positive	MW0160218	Demethylmorphine	Alkaloids	Isoquinoline alkaloids	C16H17NO3	348.04	271.121	2.1047	[M-H+2K]+	0.85	3	0.9333	rp	-	430245	-	-	-	B	1231.07	1766.95	1932.74	1631.26	1956.34	1712.71	1767.01	1742.79	1753.62	-
T3_positive	ZINC3588332	7-Oxohernangerine	Alkaloids	Alkaloids	C18H11NO5	344.054	321.064	0.8676	[M+Na]+	0.69375	4	0.983	rp	-	500429	-	-	-	B	21500.4	16561	20620.2	12522.4	17234.6	19061.5	18540.4	18560	18729.4	-
T3_positive	ZINC14588332	Daurioxoisoporphine D	Alkaloids	Aporphine alkaloids	C18H13NO4	330.075	307.084	2.5441	[M+Na]+	1.355	4	0.7172	rp	-	135447750	-	-	-	B	2613.05	2491.65	2690.44	2064.23	2318.71	2705.36	2562.91	2544.75	2545.21	-
T3_positive	MW0107948	Pyroglutamic acid	Amino acid and Its metabolites	Amino acid derivatives	C5H7NO3	130.048	129.043	1.4177	[M+H]+	5.93218	1	0.8865	rp	98-79-3	7405	HMDB0000267	-	C01879	B	14014.4	11106.7	12711.8	10581.3	9789.73	14607.1	13135.7	13229.4	12941.3	ko00480,ko01100
T3_positive	MW0151992	Kallikrein Inhibitor	Amino acid and Its metabolites	Small Peptide	C35H55N11O9	796.408	773.418	0.7728	[M+Na]+	2.03951	4	0.7015	rp	97145-43-2	126179	-	-	-	B	14743.9	18505.1	13309.5	6187.2	12140	6611.76	16727.7	16949.2	16938.4	-
T3_positive	MW0106005	Benazepril	Amino acid and Its metabolites	Amino acid derivatives	C24H28N2O5	425.21	424.2	7.5379	[M+H]+	9.81192	1	0.8994	rp	86541-75-5	5362124	HMDB0014682	-	C06843	B	625161	620551	740245	355757	387989	236995	248931	249157	241465	-
T3_positive	MW0105709	Arginine	Amino acid and Its metabolites	Amino acids	C6H14N4O2	175.116	174.112	0.7514	[M+H]+	5.03738	1	0.957	rp	74-79-3	6322	HMDB0000517	5502	C00062	A	9475.77	21217	16541.2	13773	16052.3	12880.4	21031.6	21601.7	22002.5	ko00220,ko00330,ko00470,ko00970,ko01100,ko01230,ko02010,ko04150,ko04974,ko05014,ko05022,ko05142,ko05146,ko05230
T3_positive	MEDL00575	L-Isoleucine	Amino acid and Its metabolites	Amino acids	C6H13NO2	132.101	131.095	1.5036	[M+H]+	4.34121	1	0.9601	rp	73-32-5	6306	HMDB0000172	5193	C00407	A	371408	367892	397628	322575	404031	415546	400020	398964	399726	ko00280,ko00290,ko00970,ko01100,ko01210,ko01230,ko02010,ko04974,ko04978,ko05230
T3_positive	MW0107960	L-Threonine	Amino acid and Its metabolites	Amino acids	C4H9NO3	84.0429	119.058	0.8105	[M+H-2H2O]+	3.12232	1	0.8178	rp	72-19-5	6288	HMDB0000167	32	C00188	A	12682.8	10416.2	13041.3	8733.89	12562.5	13637.3	12717.6	12972.1	12860.1	ko00260,ko00290,ko00470,ko00860,ko00970,ko01100,ko01230,ko02010,ko04974,ko04978
T3_positive	MW0109433	Pro-Ser	Amino acid and Its metabolites	Small Peptide	C8H14N2O4	203.104	202.095	6.4004	[M+H]+	2.20698	2	0.7688	rp	71835-80-8	7408257	-	23780	-	A	5318.8	4074.38	5152.44	4707	4531.17	5739.12	4957.19	5072.11	4921.82	-
T3_positive	MW0105888	Asparagine	Amino acid and Its metabolites	Amino acids	C4H8N2O3	97.043	132.054	1.4363	[M+H-2H2O]+	8.03378	1	0.7575	rp	70-47-3	6267	HMDB0000168	14	C00152	A	18112	15927.1	16919.3	13303.3	14929.7	16430.2	16494.3	16641.5	16610.2	ko00250,ko00970,ko01100,ko01230,ko04974,ko04978,ko05230
T3_positive	MW0159685	Glutathione	Amino acid and Its metabolites	Amino acid derivatives	C10H17N3O6S	308.088	307.084	0.8615	[M+H]+	5.84875	1	0.9739	rp	70-18-8	124886	HMDB0000125	44	C00051	A	1.7495e+06	1.60361e+06	1.74289e+06	1.45234e+06	1.68723e+06	1.71375e+06	1.57591e+06	1.57583e+06	1.57071e+06	ko00270,ko00480,ko01100,ko01240,ko02010,ko04216,ko04918,ko04976,ko05208,ko05415
T3_positive	FDATN01519	D-phenylalanine	Amino acid and Its metabolites	Amino acids	C9H11NO2	166.085	165.079	2.1047	[M+H]+	1.42593	1	0.99	rp	673-06-3	71567	-	-	C02265	A	477081	484909	529416	403721	544880	545448	521348	521350	521170	ko00360,ko00470,ko01100,ko04742
T3_positive	MW0108468	N-(Carboxymethyl)-D-alanine	Amino acid and Its metabolites	Amino acids	C5H9NO4	295.114	147.053	6.641	[2M+H]+	1.45	3	0.8173	rp	66642-87-3	5462254	-	-	C03790	A	45106.7	48701.3	51572.2	37596.3	34259	29089.7	40079.1	40708	40533.3	-
T3_positive	MW0109196	L-Phenylalanine	Amino acid and Its metabolites	Amino acids	C9H11NO2	188.065	165.079	2.1047	[M+Na]+	6.82451	1	0.8461	rp	63-91-2	6140	HMDB0000159	28	C00079	A	17135.3	16852.9	19839.4	13970.6	19529.2	20029.8	18805.4	18737.4	18799	ko00360,ko00400,ko00470,ko00970,ko01100,ko01210,ko01230,ko02010,ko04974,ko04978,ko05230
T3_positive	MW0108213	Methionine	Amino acid and Its metabolites	Amino acids	C5H11NO2S	150.056	149.051	1.3912	[M+H]+	7.56819	1	0.9511	rp	63-68-3	6137	HMDB0000696	5664	C00073	A	22285.9	22415.3	23950.6	19030.9	25043.2	23969.7	24299.5	24272.3	24240.8	ko00270,ko00470,ko00970,ko01100,ko01210,ko01230,ko01240,ko01523,ko04974,ko04978,ko05230
T3_positive	MEDN0048	L-Homocystine	Amino acid and Its metabolites	Amino acids	C8H16N2O4S2	269.067	268.055	1.5619	[M+H]+	8.91351	1	0.7571	rp	626-72-2	439579	HMDB0000676	-	C01817	A	17385.2	14436.2	16436.1	13015.9	13971.2	15378.7	15717.4	15654.7	15747.4	ko00270
T3_positive	MEDN0006	L-Tyrosine	Amino acid and Its metabolites	Amino acids	C9H11NO3	182.079	181.074	1.4489	[M+H]+	6.07994	1	0.9532	rp	60-18-4	6057	HMDB0000158	34	C00082	A	194636	192076	191408	186110	208532	218261	202079	202227	201655	ko00130,ko00350,ko00360,ko00400,ko00730,ko00970,ko01100,ko01210,ko01230,ko01240,ko04728,ko04916,ko04917,ko04974,ko05012,ko05030,ko05031,ko05034,ko05230
T3_positive	MW0150045	Glu-Leu	Amino acid and Its metabolites	Small Peptide	C11H20N2O5	261.141	260.137	2.2206	[M+H]+	7.63351	1	0.8187	rp	5969-52-8	9813855	HMDB0028823	44684	-	A	1230.22	1212.36	1361.34	1032.38	1816.68	1416.19	1689.24	1824.33	1802.74	-
T3_positive	FDATN01492	DL-Methionine	Amino acid and Its metabolites	Amino acids	C5H11NO2S	150.056	149.051	0.8676	[M+H]+	5.934	1	0.9326	rp	59-51-8 | 26062-47-5 | 7005-18-7 | 33807-07-7	876	HMDB0033951	-	C01733	A	12126.3	13461.3	14567.9	10926.7	13768.3	12807.3	12541.5	12494.3	12481.1	-
T3_positive	MW0108426	N-(3-Indolylacetyl)-L-isoleucine	Amino acid and Its metabolites	Amino acid derivatives	C16H20N2O3	289.158	288.147	3.3147	[M+H]+	6.69126	2	0.8816	rp	57105-45-0	644226	-	34533	-	B	12408.4	13072.1	10229.4	5427.13	15651.4	5846.61	10183.8	10207.7	10269.7	-
T3_positive	MW0169387	L-Carnitine	Amino acid and Its metabolites	Amino acids	C7H15NO3	162.11	161.105	0.8105	[M+H]+	7.63207	1	0.9469	rp	541-15-1	10917	HMDB0000062	52	C00318	A	68347.4	52236.3	69099.7	48960.6	54714	66292.9	61671.1	62419.3	61703.9	ko04714,ko04976,ko05415
T3_positive	MW0107090	Glycyl-L-prolyl-L-lysine	Amino acid and Its metabolites	Small Peptide	C13H24N4O4	301.194	300.18	5.722	[M+H]+	17.3219	2	0.819	rp	52766-29-7	24944865	-	20897	-	A	13512.5	9441.31	11508.2	6276.98	12663.1	11608.6	10147.6	12139.7	11349.4	-
T3_positive	MEDP1589	Theonylleucine	Amino acid and Its metabolites	Small Peptide	C10H20N2O4	233.147	232.142	2.0344	[M+H]+	7.03068	1	0.7649	rp	50299-12-2	7021827	HMDB0029065	-	-	A	1103.02	1974.83	2305.88	1608.35	2015.45	2023.87	1643.41	1635.51	1695.28	-
T3_positive	MEDL00359	Gly-Pro-Leu	Amino acid and Its metabolites	Small Peptide	C13H23N3O4	286.173	285.169	2.6151	[M+H]+	6.82139	1	0.7661	rp	47066-32-0	9900499	-	19134	-	A	6874.75	7493.7	7635.97	6913.05	8972.15	6487.46	7641.88	7654.86	7667.89	-
T3_positive	MW0108015	Lys-Pro-Arg	Amino acid and Its metabolites	Small Peptide	C17H33N7O4	400.275	399.259	5.4741	[M+H]+	1.62284	2	0.7683	rp	41961-57-3	488929	-	21294	-	A	2284.51	1540.66	1758.76	1472.12	2249.82	1868.15	2802.54	3196.65	3274.58	-
T3_positive	MW0106559	D-Pyroglutamic acid	Amino acid and Its metabolites	Amino acids	C5H7NO3	130.048	129.043	0.8105	[M+H]+	4.72524	1	0.9404	rp	4042-36-8	439685	HMDB0000805	63632	C02237	A	63803.5	56765.4	36800	35734.3	64671.6	69361	57480	56812.1	57393.4	ko00470,ko01100
T3_positive	MEDP1667	Phe-Glu	Amino acid and Its metabolites	Small Peptide	C14H18N2O5	295.125	294.122	2.0344	[M+H]+	9.16656	1	0.8524	rp	3617-45-6	151134	HMDB0028994	23833	-	A	4932.85	5815.9	4065.07	3753.65	6499.64	4939.4	4753.59	4753.03	4604	-
T3_positive	MW0157352	Tauropine	Amino acid and Its metabolites	Amino acids	C5H11NO5S	215.074	197.036	0.5864	[M+NH4]+	1.983	4	0.7028	rp	33497-79-9	3082376	-	-	C01616	A	3509.2	2718.39	3302.7	2753.43	2474.05	3229.78	3266.5	3242.93	3304.9	-
T3_positive	MEDP0519	L-Norleucine	Amino acid and Its metabolites	Amino acids	C6H13NO2	154.082	131.095	1.5036	[M+Na]+	6.075	3	0.7683	rp	327-57-1	21236	HMDB0001645	6334	C01933	A	13335.1	12891.8	13482.5	11460.6	13439.9	14545.2	14144.4	14103	14085.4	-
T3_positive	pme2617	L-methionine sulfoxide	Amino acid and Its metabolites	Amino acid derivatives	C5H11NO3S	165.048	165.046	0.5859	[M+]+	5.71466	2	0.8033	rp	3226-65-1	158980	HMDB0002005	6428	C02989	A	15701	14247	19332.1	13808.3	13651.9	15910	15429.4	15418.7	15465.3	ko00270,ko01100
T3_positive	MW0108608	Spaglumic acid	Amino acid and Its metabolites	Amino acid derivatives	C11H16N2O8	305.094	304.091	1.5063	[M+H]+	10.6999	1	0.8948	rp	3106-85-2	188803	HMDB0001067	-	C12270	A	12469.9	12558	12335.1	10580.5	11533.5	11907.3	12589.8	12589.9	12543.9	ko00250,ko01100,ko04080
T3_positive	MW0114745	L-Kynurenine	Amino acid and Its metabolites	Amino acids	C10H12N2O3	209.089	208.085	2.1047	[M+H]+	6.475	3	0.822	rp	2922-83-0	161166	HMDB0000684	72	C00328	A	2394.03	2026.35	2453.77	1559.89	2262.74	2224.83	2476.25	2475.53	2497.56	ko00380,ko01100,ko01240,ko05143
T3_positive	MADP0547	O-Acetyl-L-homoserine hydrochloride	Amino acid and Its metabolites	Amino acid derivatives	C6H12ClNO4	161.062	197.046	0.6045	[M+]+	18.7741	1	0.82	rp	250736-84-6 | 7540-67-2	45038083	-	-	-	B	3887.69	3043.29	4375.08	2216.23	3041.83	4281.25	2630.71	2694.2	2569.43	-
T3_positive	MEDP1061	o-Tyrosine	Amino acid and Its metabolites	Amino acids	C9H11NO3	182.079	181.074	0.8676	[M+H]+	6.59587	1	0.7592	rp	2370-61-8	91482	HMDB0006050	-	-	A	33453.5	32597.5	37373.8	24110	38556.9	35444.1	33237.3	33101.3	33158.6	-
T3_positive	MW0107651	L-Allysine ethylene acetal	Amino acid and Its metabolites	Small Peptide	C8H15NO4	207.131	189.1	5.1129	[M+NH4]+	7.53621	2	0.7112	rp	215054-80-1	11041524	-	103470	-	A	4673.78	6908.88	7937.28	5741.23	8057.06	9047.27	6349.87	6753.76	6852.65	-
T3_positive	MEDL00377	Glu-Phe	Amino acid and Its metabolites	Small Peptide	C14H18N2O5	277.116	294.122	2.5086	[M+H-H2O]+	4.70942	1	0.754	rp	20556-22-3	18653118	HMDB0029156	23756	-	A	2494.47	3200	2557.46	2997.45	2445.71	2508.18	3158.47	3174.74	3132.65	-
T3_positive	MW0109339	Pro-Tyr	Amino acid and Its metabolites	Small Peptide	C14H18N2O4	301.111	278.127	2.5264	[M+Na]+	7.77848	1	0.7489	rp	19786-36-8	152264	HMDB0029029	23717	-	A	486.242	755.103	776.962	495.133	1665.46	1125.61	1410.11	1430.07	1499.35	-
T3_positive	MW0107268	His-Phe	Amino acid and Its metabolites	Small Peptide	C15H18N4O3	347.111	302.138	2.6861	[M-H+2Na]+	5.775	3	0.8334	rp	16874-81-0	152198	HMDB0028892	23702	-	A	54992.1	48048.4	52293.1	37808.3	45159.7	50221.3	47698.2	47702.7	47916.4	-
T3_positive	MW0106528	DL-Pyroglutamic acid	Amino acid and Its metabolites	Amino acids	C5H7NO3	130.048	129.043	1.1126	[M+H]+	4.78144	2	0.8207	rp	149-87-1 | 16891-48-8	499	HMDB0000805	-	-	A	22747.1	15387.8	20525.9	14893.7	21979.6	21100.2	17004.8	17775.5	17692.2	-
T3_positive	MW0158310	H-Trp-ser-OH	Amino acid and Its metabolites	Small Peptide	C14H17N3O4	292.125	291.122	2.6273	[M+H]+	7.99524	1	0.7135	rp	133101-40-3	7009660	-	65152	-	A	2946.07	2582.62	3692.95	1788.42	2284.81	3588.44	2457.89	2568.41	2495.15	-
T3_positive	MW0108639	N-Acetyl-L-glutamic acid	Amino acid and Its metabolites	Amino acid derivatives	C7H11NO5	258.058	189.064	1.4855	[M+Na+HCOOH]+	1.525	3	0.8348	rp	1188-37-0	70914	HMDB0001138	-	C00624	A	4117.21	3767.01	3543.94	3534.91	3756.24	5286.4	4352.33	4299.04	4313.6	ko00220,ko00470,ko01100,ko01210,ko01230
T3_positive	MW0108615	N-Acetyl-DL-methionine	Amino acid and Its metabolites	Amino acid derivatives	C7H13NO3S	192.066	191.062	2.8285	[M+H]+	6.23122	1	0.9215	rp	1115-47-5	6180	-	62466	-	A	1389.98	1766.09	2246.54	1456.1	2200.96	1921.89	1950.89	1950.83	1952.9	-
T3_positive	MEDL02021	Sarcosine	Amino acid and Its metabolites	Amino acids	C3H7NO2	90.0534	89.0477	0.8105	[M+H]+	4.69234	1	0.9777	rp	107-97-1	1088	HMDB0000271	51	C00213	A	6856.56	6175.07	7260.59	5617.48	6473.15	6330.28	6816.39	6970.52	6962.86	ko00260,ko00330,ko01100
T3_positive	MW0137720	Colladonin	Amino acid and Its metabolites	Small Peptide	C24H30O4	383.224	382.214	2.775	[M+H]+	3.62963	2	0.7573	rp	100785-98-6	375430	HMDB0029488	-	-	A	2753.13	2379.39	2455.8	2195.47	2784.52	2107.95	2386.24	2390.68	2333.02	-
T3_positive	MW0110280	Tyr-Cys	Amino acid and Its metabolites	Small Peptide	C12H16N2O4S	284.077	284.083	1.6045	[M+]+	12.0333	1	0.7686	rp	-	18642383	HMDB0029102	24025	-	A	1301.42	1622.39	1853	1621.24	1883.06	1968.95	1751.73	1777.37	1778.82	-
T3_positive	MW0151666	Ile-Asp	Amino acid and Its metabolites	Small Peptide	C10H18N2O5	247.127	246.122	2.3853	[M+H]+	4.87854	1	0.7601	rp	-	14304554	HMDB0028903	23843	-	A	2965.21	6246.74	2858.32	5414.84	6234.57	5329.85	5151.07	5158.69	5208.65	-
T3_positive	MW0106320	Cysteinyl-glutamate	Amino acid and Its metabolites	Small Peptide	C8H14N2O5S	233.056	250.062	1.431	[M+H-H2O]+	6.06049	1	0.7454	rp	-	18218194	HMDB0028774	-	-	A	48074.8	55080.4	43621	48847.4	41828.9	50313.7	46078.9	46924.1	45007.5	-
T3_positive	MW0155193	Phe-Glu-Val-Glu	Amino acid and Its metabolites	Small Peptide	C24H34N4O9	523.238	522.233	7.5725	[M+H]+	2.60595	2	0.9365	rp	-	25168977	-	137023	-	A	34236.9	49665.2	48863.1	14687.1	24016.6	26803.7	20102.9	19354.8	19213.1	-
T3_positive	MW0158099	Trp-Arg-Phe	Amino acid and Its metabolites	Small Peptide	C26H33N7O4	508.268	507.259	7.5725	[M+H]+	0.979021	2	0.9261	rp	-	11318143	-	19276	-	A	20547	32943.9	34957	7378.31	10902.9	11563.1	8822.92	8352.37	8906.7	-
T3_positive	MW0109045	4-Chloro-L-phenylalanine	Amino acid and Its metabolites	Amino acids	C9H10ClNO2	200.045	199.04	2.6328	[M+H]+	6.15238	2	0.9197	rp	-	736190	HMDB0244605	-	-	B	176153	155351	172037	119794	144635	160994	158798	158460	159218	-
T3_positive	MW0150831	His-Ala-Val-Asp	Amino acid and Its metabolites	Small Peptide	C18H28N6O7	441.204	440.202	6.3198	[M+H]+	8.60197	2	0.9174	rp	-	-	-	151821	-	A	10591.5	24740.8	25815.5	22194.1	21976.9	24309.7	23963.7	24023.3	23963.2	-
T3_positive	MW0150967	His-Ile-Asn	Amino acid and Its metabolites	Small Peptide	C16H26N6O5	383.2	382.197	7.3111	[M+H]+	10.2208	2	0.9134	rp	-	145455868	-	18558	-	A	97914.4	93901.4	87053.2	58028.8	63040.7	49519.4	44574.1	43511.2	43400.7	-
T3_positive	MW0158158	Trp-His-Asp	Amino acid and Its metabolites	Small Peptide	C21H24N6O6	457.178	456.176	6.3198	[M+H]+	6.43883	2	0.9109	rp	-	145458380	-	20570	-	A	12570.1	11327.3	11107.5	10990.8	9426.17	9924.33	11464.5	11384.5	11248.4	-
T3_positive	MW0110073	Trp-Lys-Arg	Amino acid and Its metabolites	Small Peptide	C23H36N8O4	489.298	488.286	3.3508	[M+H]+	8.94056	2	0.9088	rp	-	145458424	-	23259	-	A	4422.37	3842.96	4741.91	3900.6	4000.39	4318.59	4170.91	4184.67	4171.07	-
T3_positive	MW0157826	Thr-Trp-Met	Amino acid and Its metabolites	Small Peptide	C20H28N4O5S1	437.188	436.178	6.4546	[M+H]+	9.48009	2	0.9019	rp	-	145458226	-	18104	-	A	79113.3	92972.8	106383	58041.4	48275.7	62456	58052.6	60232.5	59609.5	-
T3_positive	MW0153511	Met-Asn-Thr	Amino acid and Its metabolites	Small Peptide	C13H24N4O6S1	365.152	364.142	2.9994	[M+H]+	8.21347	2	0.8993	rp	-	91975238	-	23629	-	A	968.005	4100.97	1280.79	1112.32	5734.34	1264.7	9495.35	9596.2	9862.2	-
T3_positive	MW0145508	Arg-Thr-Ala	Amino acid and Its metabolites	Small Peptide	C13H26N6O5	347.2	346.197	3.8472	[M+H]+	10.7115	2	0.8973	rp	-	145453946	-	20906	-	A	5374.67	6052.75	5012.12	588.9	6981.37	714.466	6086.33	6066.86	6061.23	-
T3_positive	MW0105450	Ala-Ala-Arg	Amino acid and Its metabolites	Small Peptide	C12H24N6O4	317.189	316.186	4.15	[M+H]+	9.57972	2	0.895	rp	-	9861720	-	22244	-	A	16654.9	14329.7	13532.7	5874.61	19295.5	6499.28	11174.9	11118.9	11170	-
T3_positive	MW0146032	Asp-Arg-Tyr	Amino acid and Its metabolites	Small Peptide	C19H28N6O7	453.204	452.202	3.2787	[M+H]+	13.4507	2	0.8884	rp	-	91975563	-	18351	-	A	1306.29	2922.6	315.079	1055.88	3580.41	1242.46	5282.01	5318.6	5427.52	-
T3_positive	MW0158613	Tyr-Ser-Val-Glu	Amino acid and Its metabolites	Small Peptide	C22H32N4O9	497.23	496.217	3.405	[M+H]+	13.724	2	0.8808	rp	-	-	-	261822	-	A	1414.88	2374.85	1281.93	1145.86	2829.34	1254.66	3785.08	3802.01	3894.28	-
T3_positive	MW0107257	His-His-Lys	Amino acid and Its metabolites	Small Peptide	C18H28N8O4	421.235	420.223	3.7525	[M+H]+	1.01349	2	0.8705	rp	-	71737528	-	18791	-	A	2470.89	2947.09	2797.84	1758.32	2584.4	3554.24	1873.96	2122.55	1986.12	-
T3_positive	MW0107099	Gly-Val-Arg	Amino acid and Its metabolites	Small Peptide	C13H26N6O4	331.205	330.202	4.6137	[M+H]+	12.2843	2	0.8631	rp	-	101736690	-	21366	-	A	17643.7	16556.2	16511.3	10321.8	16553.8	13049.4	14974.4	15069.1	15026.4	-
T3_positive	MW0155873	Pro-Gly-Val	Amino acid and Its metabolites	Small Peptide	C12H21N3O4	272.157	271.153	1.9994	[M+H]+	5.62539	2	0.8459	rp	-	145457477	-	22309	-	A	7828.94	8404.83	8924.72	6860.13	9433.81	9468.72	8492.24	8531.98	8515.14	-
T3_positive	MW0150401	Gly-Leu-Asp-Val-Trp	Amino acid and Its metabolites	Small Peptide	C28H40N6O8	589.305	588.291	7.2758	[M+H]+	14.5769	2	0.8354	rp	-	-	-	264690	-	A	3319.1	3037.95	3310.77	2468.06	2487.57	2314.01	2471.01	2490.89	2468.99	-
T3_positive	MW0149844	Gln-Tyr-Ser	Amino acid and Its metabolites	Small Peptide	C17H24N4O7	397.179	396.164	6.3407	[M+H]+	19.3882	2	0.8328	rp	-	145455262	-	20664	-	A	69825.4	26742.2	54098.9	55589.5	54615	57929.8	59801.9	59707.4	59701.3	-
T3_positive	MW0157605	Thr-Gln-Asp	Amino acid and Its metabolites	Small Peptide	C13H22N4O8	363.158	362.144	3.0529	[M+H]+	17.1381	2	0.8242	rp	-	145458022	-	21360	-	A	1519.33	2069.65	1348.74	1748.89	2917.59	287.322	5652.86	5816.3	5826.16	-
T3_positive	MW0153699	Met-Tyr-Gln	Amino acid and Its metabolites	Small Peptide	C19H28N4O6S1	441.183	440.173	7.5379	[M+H]+	5.58893	2	0.8204	rp	-	145457095	-	16906	-	A	130053	118086	130210	92558.4	96789.1	61761.4	67703.5	67189.8	65894.3	-
T3_positive	MW0151618	Ile-Trp-Tyr	Amino acid and Its metabolites	Small Peptide	C26H32N4O5	481.255	480.237	3.405	[M+H]+	20.5332	2	0.8197	rp	-	145456306	-	16193	-	A	1445.62	3015.95	1402.43	1183.97	3883.52	1317.7	4828.33	4913.46	4969.59	-
T3_positive	MW0145363	Arg-Gly-Leu	Amino acid and Its metabolites	Small Peptide	C14H28N6O4	345.22	344.217	5.7686	[M+H]+	9.15803	2	0.8074	rp	-	101771486	-	22586	-	A	5006.77	3115.79	3159.78	2662.02	5525.32	2839.48	3236.27	3239.78	3231.56	-
T3_positive	MW0155826	Pro-Gln-Ala	Amino acid and Its metabolites	Small Peptide	C13H22N4O5	315.174	314.159	5.1642	[M+H]+	18.7429	2	0.8015	rp	-	145457441	-	15818	-	A	5693.05	5169.24	5094.13	3319.43	5196.76	3350.52	5659.59	5652.82	5642.93	-
T3_positive	MW0106921	Glu-Pro-Arg	Amino acid and Its metabolites	Small Peptide	C16H28N6O6	401.207	400.207	1.6295	[M+H]+	16.0704	2	0.7993	rp	-	145455472	-	23172	-	A	4842.88	3115.05	3169.41	3289.55	3610.65	4289.59	3378.75	3387.24	3240.09	-
T3_positive	MW0105652	Arg-Gln-Arg	Amino acid and Its metabolites	Small Peptide	C17H34N10O5	476.3	458.271	3.405	[M+NH4]+	6.59465	2	0.7993	rp	-	10226357	-	19907	-	A	960.619	4289.81	1884.63	1393.14	3251.2	1950.78	7621.95	7644.08	7807.07	-
T3_positive	MW0151009	His-Lys-Gln-Lys	Amino acid and Its metabolites	Small Peptide	C23H41N9O6	540.325	539.318	7.2758	[M+H]+	5.8054	2	0.7905	rp	-	-	-	154947	-	A	14592.9	14964.9	14407.9	11272.1	10845	9865.48	10005.4	9955.79	9825.64	-
T3_positive	MW0155109	Phe-Asn-Leu	Amino acid and Its metabolites	Small Peptide	C19H28N4O5	393.204	392.206	3.1524	[M+H]+	22.8376	2	0.7901	rp	-	145457150	-	21956	-	A	482.273	1580.22	465.553	402.552	459.762	530.232	3291.13	3403.5	3332.26	-
T3_positive	MW0110079	Trp-Pro-Lys	Amino acid and Its metabolites	Small Peptide	C22H31N5O4	430.238	429.238	3.809	[M+H]+	13.0594	2	0.7875	rp	-	71471842	-	19676	-	A	6275.52	5483.77	5932.75	4134.45	5299.61	5968.94	5512.26	5458.21	5452.54	-
T3_positive	MW0110290	Tyrosyl-Methionine	Amino acid and Its metabolites	Amino acid derivatives	C14H20N2O4S	277.101	312.114	2.6328	[M+H-2H2O]+	1.48559	2	0.7831	rp	-	46937960	HMDB0029111	-	-	B	1877.04	3652.32	1335.29	1657.28	3704.41	1196.3	6235.95	7133.75	7593.08	-
T3_positive	MW0106502	Benzyl n-[(2s)-4-methyl-1-[[(2r)-4-methyl-1-[[(2s)-4-methyl-1-oxopentan-2-yl]amino]-1-oxopentan-2-yl]amino]-1-oxopentan-2-yl]carbamate	Amino acid and Its metabolites	Amino acid derivatives	C26H41N3O5	476.323	475.305	3.7159	[M+H]+	21.5195	2	0.78	rp	-	45103781	-	45589	-	B	32382.2	29229.5	29807.1	27057.4	29055.9	30867	31143.7	31063.7	30921.8	-
T3_positive	MW0146221	Asp-Phe-Gly	Amino acid and Its metabolites	Small Peptide	C15H19N3O6	320.125	337.127	4.4577	[M+H-H2O]+	6.517	2	0.7757	rp	-	71255013	-	20046	-	A	40664.8	31572.5	32443.8	20643.2	34946.6	28783.9	12866.3	13121.4	11935.2	-
T3_positive	MW0158603	Tyr-Ser-Glu-Lys	Amino acid and Its metabolites	Small Peptide	C23H35N5O9	526.251	525.244	5.3587	[M+H]+	3.27313	2	0.7755	rp	-	-	-	261547	-	A	186.258	108.187	149.351	146.179	136.737	147.866	745.224	758.017	765.077	-
T3_positive	MW0109073	isovaleryl-Val-Val-Sta(3xi,4xi)-Ala-Sta(3xi,4xi)-OH	Amino acid and Its metabolites	Amino acid derivatives	C34H63N5O9	708.465	685.463	4.7596	[M+Na]+	16.5019	2	0.7727	rp	-	5462227	HMDB0005007	-	C00773	B	1727.27	2165.16	2170.89	2290.33	1302.59	1086.22	1643.9	1704.9	1616.59	-
T3_positive	MW0158282	Trp-Val-Arg	Amino acid and Its metabolites	Small Peptide	C22H33N7O4	460.264	459.259	6.641	[M+H]+	3.02897	2	0.7722	rp	-	11963125	-	22500	-	A	350344	345568	369353	280302	275916	252668	295697	298477	293040	-
T3_positive	MW0150978	His-Ile-Phe	Amino acid and Its metabolites	Small Peptide	C21H29N5O4	416.223	415.222	3.2244	[M+H]+	18.8332	2	0.7716	rp	-	145455879	-	21780	-	A	6325.65	5089.37	5263.8	3876.2	5187.39	6060.94	6079.95	6085.55	6023.06	-
T3_positive	MW0145406	Arg-Leu-Ala	Amino acid and Its metabolites	Small Peptide	C15H30N6O4	359.236	358.233	6.978	[M+H]+	9.48584	2	0.7645	rp	-	145453863	-	20992	-	A	6033.13	5354.79	5447.79	2534.62	4257.54	3196.72	2820.16	2729.99	2946.03	-
T3_positive	MW0145523	Arg-Thr-Ser	Amino acid and Its metabolites	Small Peptide	C13H26N6O6	363.194	362.191	3.2967	[M+H]+	13.9186	2	0.7622	rp	-	124420574	-	21768	-	A	2179.42	2349.48	2272	595.633	1921.54	2207.28	2195.91	2190.12	2227.37	-
T3_positive	MW0145572	Arg-Val-Ser	Amino acid and Its metabolites	Small Peptide	C14H28N6O5	361.219	360.212	7.3111	[M+H]+	2.21817	2	0.7616	rp	-	145453994	-	16185	-	A	247434	237485	221824	174504	167870	128895	133023	130724	129770	-
T3_positive	MW0105462	Ala-Glu-Arg	Amino acid and Its metabolites	Small Peptide	C14H26N6O6	392.21	374.191	6.2696	[M+NH4]+	0.850948	2	0.7611	rp	-	145453572	-	16402	-	A	1935.52	2123.18	2008.48	1422.19	767.613	1078.53	1770.29	1744.64	1743.12	-
T3_positive	MW0158633	Tyr-Thr-Val-Thr-Leu	Amino acid and Its metabolites	Small Peptide	C28H45N5O9	596.328	595.322	6.9692	[M+H]+	4.51331	2	0.7592	rp	-	-	-	264343	-	A	6273.76	3606.13	3238.04	2852.36	3204.02	2454.68	2898.59	2823.26	2718.81	-
T3_positive	MW0158728	Tyrosylserine	Amino acid and Its metabolites	Amino acid derivatives	C12H16N2O5	391.115	268.106	1.5618	[M+H]+	4.15104	2	0.7572	rp	-	18218253	HMDB0029114	-	-	B	14250.6	10526.2	10240.5	8704.24	9853.89	9666.77	9617.96	9564.98	9659.24	-
T3_positive	MW0145296	Arg-Asp-Ile	Amino acid and Its metabolites	Small Peptide	C16H30N6O6	420.254	402.223	7.5379	[M+NH4]+	4.34811	2	0.7571	rp	-	145453764	-	15720	-	A	25576.6	31505.7	26403.6	15875.1	15074.7	9037.38	12074	10809.9	12199.3	-
T3_positive	MW0149758	Gln-Lys-Leu-Glu	Amino acid and Its metabolites	Small Peptide	C22H40N6O8	517.303	516.291	6.755	[M+H]+	16.9822	2	0.7563	rp	-	-	-	210862	-	A	7969	8547.99	14268.4	3534.03	4576.84	4822.14	4599.65	4693.35	4671.6	-
T3_positive	MW0149850	Gln-Val-Ala	Amino acid and Its metabolites	Small Peptide	C13H24N4O5	299.179	316.175	5.362	[M+H-H2O]+	17.1982	2	0.7545	rp	-	145455267	-	15674	-	A	7898.33	6895.72	7213.46	6768.12	7200.1	6001.28	8707.52	8673.28	8673.75	-
T3_positive	MW0159015	Val-Gly-Val	Amino acid and Its metabolites	Small Peptide	C12H23N3O4	274.167	273.169	4.0477	[M+H]+	21.9239	2	0.7481	rp	-	71352363	-	23531	-	A	5394.84	5024.81	5503.98	1503.62	4590.57	4294.86	5325.34	5293.86	5328.07	-
T3_positive	MW0144704	Ala-Pro-Ala	Amino acid and Its metabolites	Small Peptide	C11H19N3O4	280.13	257.138	2.5264	[M+Na]+	4.36383	2	0.7474	rp	-	9816556	-	16190	-	A	11217.6	9699.06	10741.7	7515.86	9393.91	10432.6	10070.2	10140.4	10138.7	-
T3_positive	MW0158589	Tyr-Pro-Ile	Amino acid and Its metabolites	Small Peptide	C20H29N3O5	392.223	391.211	4.5168	[M+H]+	9.92122	2	0.7467	rp	-	11326774	-	18692	-	A	9714.76	9008.32	9252.15	8739.55	7832.83	9249.35	8869.8	8787.74	8866.85	-
T3_positive	MW0158629	Tyr-Thr-Thr	Amino acid and Its metabolites	Small Peptide	C17H25N3O7	348.165	383.169	2.1612	[M+H-2H2O]+	23.7298	2	0.7467	rp	-	145458777	-	23613	-	A	2586.5	1835.37	2529.88	1848.32	2210.7	2224.12	2129.57	2177.7	2099.28	-
T3_positive	MW0158254	Trp-Thr-Ile	Amino acid and Its metabolites	Small Peptide	C21H30N4O5	419.222	418.222	6.8632	[M+H]+	5.49156	2	0.7466	rp	-	11976251	-	15827	-	A	13272.3	10369.6	15642.7	13440.3	14655.8	12538.8	9303.68	9051.11	9020.36	-
T3_positive	MW0150438	Gly-Met-Thr	Amino acid and Its metabolites	Small Peptide	C11H21N3O5S1	290.114	307.12	6.018	[M+H-H2O]+	7.09591	2	0.7459	rp	-	101698529	-	19418	-	A	5017.66	4729.47	5291.95	3935.82	4542.48	4466.7	5034.62	5034.53	4983.83	-
T3_positive	MW0155310	Phe-Pro-Asn	Amino acid and Its metabolites	Small Peptide	C18H24N4O5	415.139	376.175	2.1047	[M+K]+	6.05914	2	0.7329	rp	-	145457296	-	20266	-	A	7051.77	7460.61	8104.41	6507.9	9339.58	9432.29	8493.5	8523.54	8492.19	-
T3_positive	MW0152918	Lys-Cys-Ala	Amino acid and Its metabolites	Small Peptide	C12H24N4O4S1	343.141	320.152	0.6045	[M+Na]+	2.27308	2	0.7326	rp	-	145456621	-	18840	-	A	4790.35	5918.04	5937.14	6365.09	5540.22	6132.28	5714.45	5865.15	5728.02	-
T3_positive	MW0151497	Ile-Leu-Thr	Amino acid and Its metabolites	Small Peptide	C16H31N3O5	345.223	345.226	6.5502	[M+]+	6.50213	2	0.7298	rp	-	145456197	-	18043	-	A	12571.3	10885.9	12497.5	8460.38	9059.18	7220.07	7949.74	7948.36	7897.93	-
T3_positive	MW0145517	Arg-Thr-Ile	Amino acid and Its metabolites	Small Peptide	C16H32N6O5	389.257	388.243	6.4004	[M+H]+	19.9426	2	0.729	rp	-	145453953	-	20883	-	A	23964.7	19940	18542.8	20529.7	17282	18570.1	18713.2	18846.5	18709.3	-
T3_positive	MW0159147	Val-Pro-Val	Amino acid and Its metabolites	Small Peptide	C15H27N3O4	314.213	313.2	6.2411	[M+H]+	16.0912	2	0.7283	rp	-	10358218	-	16064	-	A	22322.5	19411.7	22399.2	15406.3	20332.2	20012.3	19829	20060.2	20070.7	-
T3_positive	MW0153505	Met-Asn-Gly	Amino acid and Its metabolites	Small Peptide	C11H20N4O5S1	321.118	320.115	3.0983	[M+H]+	11.1221	2	0.7228	rp	-	145456860	-	17934	-	A	5966.85	5944.44	6704.16	3401.57	4508.62	4515.21	4748.24	4827.31	4738.16	-
T3_positive	MW0150105	Glu-Phe-Leu-Val-Met	Amino acid and Its metabolites	Small Peptide	C30H47N5O8S	638.329	637.314	8.177	[M+H]+	11.3678	2	0.7205	rp	-	-	-	264774	-	A	3362.65	4091.64	4580.56	2129.04	1169.48	561.673	1849.21	1824.3	1802.41	-
T3_positive	MW0153166	Lys-Trp-Phe	Amino acid and Its metabolites	Small Peptide	C26H33N5O4	480.266	479.253	6.8576	[M+H]+	8.53164	2	0.7141	rp	-	10116644	-	19429	-	A	1662.1	1978.53	1162.66	1309.39	1491.45	1448.07	2171.98	2131.36	2178.59	-
T3_positive	MW0156692	Ser-Cys-Gln	Amino acid and Its metabolites	Small Peptide	C11H20N4O6S1	359.099	336.11	2.4911	[M+Na]+	1.21619	2	0.7138	rp	-	18709916	-	21247	-	A	6392.84	6850.45	6136.44	4469.23	5673.49	8655.64	6773.96	6792.93	6824.53	-
T3_positive	MW0103839	Tiopronin	Amino acid and Its metabolites	Amino acid derivatives	C5H9NO3S	164.04	163.03	5.581	[M+H]+	4.99538	2	0.7103	rp	-	5483	-	-	C73708	B	1130.48	1779.3	1785.45	924.086	1155.9	1048.73	1421.56	1553.53	1461.66	-
T3_positive	MW0145265	Arg-Arg-Thr	Amino acid and Its metabolites	Small Peptide	C16H33N9O5	432.275	431.26	3.2787	[M+H]+	14.1449	2	0.7098	rp	-	10288034	-	22983	-	A	2320.39	6643.72	2385.59	2181.33	9020.07	2658.3	12865.2	12973.1	13298.8	-
T3_positive	MW0156761	Ser-Gly-Thr	Amino acid and Its metabolites	Small Peptide	C9H17N3O6	302.079	263.112	3.0983	[M+K]+	11.9017	2	0.7082	rp	-	9965117	-	17243	-	A	2748.97	2221.67	2622.15	1295.94	2606.99	1051.05	1754.58	1905	1881.77	-
T3_positive	MW0157553	Thr-Arg-Leu	Amino acid and Its metabolites	Small Peptide	C16H32N6O5	389.246	388.243	5.1246	[M+H]+	13.5509	2	0.7071	rp	-	145457959	-	22739	-	A	5377.07	4454.77	4484.72	1231.86	3691.73	2607.01	4695.45	4682.93	4693.75	-
T3_positive	MW0155999	Pro-Thr-Asn	Amino acid and Its metabolites	Small Peptide	C13H22N4O6	331.158	330.154	4.0356	[M+H]+	13.1491	2	0.706	rp	-	145457584	-	21211	-	A	3892.43	2409.9	4302.47	2813.7	3740.42	3688.19	4048.77	4075.12	4122.51	-
T3_positive	MW0150851	His-Asn-Gly	Amino acid and Its metabolites	Small Peptide	C12H18N6O5	327.148	326.134	1.5944	[M+H]+	16.5785	2	0.7047	rp	-	145455766	-	18061	-	A	29755.9	25289.9	27097.9	22575.1	23541	25769	24714.1	24796.6	24694.8	-
T3_positive	MW0156043	Pro-Val-Asn	Amino acid and Its metabolites	Small Peptide	C14H24N4O5	329.178	328.175	2.0869	[M+H]+	12.6508	2	0.7047	rp	-	145457635	-	22067	-	A	1414.61	2882.67	2769.6	2509.61	3161.72	2667.8	2560.16	2551.27	2577.09	-
T3_positive	MW0152140	L-beta-aspartyl-L-arginine	Amino acid and Its metabolites	Amino acids	C10H19N5O5	331.172	289.139	6.3609	[M+CH3CN+H]+	1.05	3	0.9206	rp	-	44602459	-	-	C19843	A	10907	8572.06	9137.85	8099.46	7055.07	7756.74	7705.36	7627.32	7656.63	-
T3_positive	MW0151665	Ile-Asn	Amino acid and Its metabolites	Small Peptide	C10H19N3O4	360.021	245.138	1.4855	[M-2H+3K]+	20.85	3	0.8557	rp	-	4414300	HMDB0028902	24003	-	A	5698.44	5139.7	5046.2	4703.37	4720	6603.18	5888.25	5937.48	5873.45	-
T3_positive	MW0105155	4-(Phosphonooxy)-L-threonine	Amino acid and Its metabolites	Amino acid derivatives	C4H10NO7P	279.036	215.019	0.8288	[M+CH3CN+Na]+	2.525	3	0.8175	rp	-	440901	HMDB0006802	-	C06055	B	3861.55	5170.36	3031.08	6091.79	6308.33	3002.78	5138.32	5120.81	4962.98	ko00750,ko01100,ko01240
T3_positive	MW0147927	cyclo(dehydrophenylalanyl-L-leucyl)	Amino acid and Its metabolites	Small Peptide	C15H18N2O2	259.148	258.137	3.5321	[M+H]+	10.9319	3	0.7861	rp	-	6865700	-	-	C20521	A	17725.2	15348.8	29023.2	10139.9	15772.9	17710.1	16142.2	15816.7	16157.2	-
T3_positive	MW0107655	DL-Arginine	Amino acid and Its metabolites	Amino acids	C6H14N4O2	197.098	174.112	0.7514	[M+Na]+	6.45	3	0.7565	rp	-	232	HMDB0251511	-	C02385	A	4163.18	3536.11	4716.2	6376.48	4801.85	2427.36	3418.48	3101.73	3206.65	-
T3_positive	MW0108382	Unk-DL-Val-DL-OVal-DL-Val-DL-OAla-DL-Val-DL-OVal-DL-Val-OH	Amino acid and Its metabolites	Amino acid derivatives	C36H62N4O13	776.464	758.431	7.6248	[M+NH4]+	1.7647	4	0.9578	rp	-	75368738	-	-	-	B	9147.9	9020.2	9036.17	17780	16468.5	15226.6	15613.5	15392.5	15502.4	-
T3_positive	MW0105512	Alanylglutamylarginine	Amino acid and Its metabolites	Small Peptide	C14H26N6O6	392.224	374.191	6.3407	[M+NH4]+	5.95675	4	0.8712	rp	-	18218344	-	-	-	A	65125.7	61084.1	60183.4	58856.5	54243	57682.1	58841.9	58728.1	58417.4	-
T3_positive	MW0161750	L-kynureninate	Amino acid and Its metabolites	Amino acids	C10H11N2O3-	246.039	207.077	1.4886	[M+K]+	0.08175	4	0.748	rp	-	20848909	-	-	-	A	6958.29	7053.48	7648.57	6186.29	6249.54	7710.37	5843.96	5545.92	5311.64	-
T3_positive	MW0109551	S-(3-oxo-3-carboxy-n-propyl)cysteine	Amino acid and Its metabolites	Amino acid derivatives	C7H11NO5S	244.019	221.036	0.5864	[M+Na]+	0.517	4	0.7372	rp	-	21252272	HMDB0002135	-	-	B	4212.38	3561.19	4431.06	3036.96	3424.83	4279.2	4160.19	4201.5	4190.35	-
T3_positive	MW0107448	Ile-Leu-Asn	Amino acid and Its metabolites	Small Peptide	C16H30N4O5	381.208	358.222	2.2997	[M+Na]+	0.9495	4	0.7268	rp	-	102179597	-	23308	-	A	2559.18	2207.95	1491.24	2843.85	2973.03	3002.73	2484.27	2500.02	2462.08	-
T3_positive	MW0151160	His-Val-Val	Amino acid and Its metabolites	Small Peptide	C16H27N5O4	354.215	353.206	1.5036	[M+H]+	1.73875	4	0.7084	rp	-	13968092	-	21706	-	A	9885.11	8887.79	10099.9	8088.57	9656.48	9828.49	9161.45	9066.02	9009.39	-
T3_positive	MW0145995	Asn-Trp	Amino acid and Its metabolites	Small Peptide	C15H18N4O4	319.135	318.133	2.6506	[M+H]+	17.7034	1	0.7564	rp	-	18218187	HMDB0028742	-	-	A	694.215	1736.76	1931.4	1384.85	7627.18	2051.79	3035.03	3038.68	3046.29	-
T3_positive	MW0194185	3-Azaniumyl-4-[(1-methoxy-1-oxo-3-phenylpropan-2-yl)amino]-4-oxobutanoate	Amino acid and Its metabolites	Small Peptide	C14H18N2O5	295.125	294.122	2.8465	[M+H]+	13.0815	1	0.7465	rp	-	44355849	HMDB0001894	-	-	A	3380.46	2911.27	4019.15	2814.9	1615.38	4710.71	2490.77	2742.69	2577.11	-
T3_positive	MW0145662	Asn-Ala-Leu-Ala-His	Amino acid and Its metabolites	Small Peptide	C22H36N8O7	525.281	524.271	3.5139	[M+H]+	3.37745	2	0.9405	rp	-	-	-	264071	-	A	1264.14	2017.16	1149.85	694.048	2333.29	1188.88	3093.56	3097.26	3150.56	-
T3_positive	MW0145850	Asn-Phe-Ala-Arg	Amino acid and Its metabolites	Small Peptide	C22H34N8O6	507.265	506.26	7.5725	[M+H]+	1.29792	2	0.9402	rp	-	-	-	193093	-	A	61373.6	98181.3	101094	21081.5	29133.8	34220.6	26793.4	26342.6	25419.2	-
T3_positive	MW0158916	Val-Asn-His-Val-Thr	Amino acid and Its metabolites	Small Peptide	C24H40N8O8	569.307	568.297	3.6049	[M+H]+	3.87158	2	0.9269	rp	-	-	-	264082	-	A	647.824	1942.31	1047.99	367.16	1945.2	1143.5	2399.72	2481.41	2415.57	-
T3_positive	MW0156644	Ser-Arg-Ile-Lys	Amino acid and Its metabolites	Small Peptide	C21H42N8O6	503.328	502.323	8.1571	[M+H]+	4.91968	2	0.9116	rp	-	-	-	229227	-	A	1676.47	1149.94	1577.27	940.476	1113.58	1982.87	1553.09	1867.54	1715.32	-
T3_positive	MW0145690	Asn-Asn-Leu-Asn-Val	Amino acid and Its metabolites	Small Peptide	C23H40N8O9	573.296	572.292	6.6936	[M+H]+	2.11512	2	0.9017	rp	-	-	-	264378	-	A	3254.84	3542.66	3650.69	2855.82	3003.01	3701.14	3702.65	3656.22	3430.74	-
T3_positive	MW0152231	Leu-Arg-Pro-Thr-Leu	Amino acid and Its metabolites	Small Peptide	C27H50N8O7	599.382	598.38	3.0077	[M+H]+	9.6767	2	0.901	rp	-	-	-	264428	-	A	1615.49	4734.83	6098.59	1859.03	6697.23	3438.45	5177.17	5209.21	5215.69	-
T3_positive	MW0153022	Lys-Ile-Val-Lys	Amino acid and Its metabolites	Small Peptide	C23H46N6O5	487.354	486.353	8.1684	[M+H]+	14.115	2	0.9008	rp	-	-	-	170627	-	A	7996.94	7818.76	19395	5708.12	7011.25	4942.26	10336.3	11153.3	9948.32	-
T3_positive	MW0158723	Tyr-Phe4Cl-OH	Amino acid and Its metabolites	Small Peptide	C24H21ClN2O7	485.106	484.104	6.6758	[M+H]+	6.6898	2	0.8801	rp	-	-	-	64977	-	A	13527.9	5191.7	572.287	9956.37	576.892	722.896	12169.4	12067.8	11930.8	-
T3_positive	MW0152851	Lys-Ala-Leu-Glu	Amino acid and Its metabolites	Small Peptide	C20H37N5O7	477.303	459.269	3.385	[M+NH4]+	0.282303	2	0.8724	rp	-	-	-	167662	-	A	357.493	1486.04	617.398	416.71	2173.55	484.586	2311.63	2392.36	2368.8	-
T3_positive	MW0153186	Lys-Tyr-Thr-Ser-Ser	Amino acid and Its metabolites	Small Peptide	C25H40N6O10	585.281	584.281	3.6049	[M+H]+	13.4333	2	0.8707	rp	-	-	-	264877	-	A	456.609	586.327	669.889	449.028	1038.91	781.632	1419.97	1455.98	1425.24	-
T3_positive	MW0153142	Lys-Thr-Ala-Lys-Asp	Amino acid and Its metabolites	Small Peptide	C23H43N7O9	562.319	561.312	6.5826	[M+H]+	1.01972	2	0.8628	rp	-	-	-	264437	-	A	19952.4	16894.5	16060	24438.7	9274.24	23124.1	17799	17784.5	16502.7	-
T3_positive	MW0155437	Phe4Cl-Tyr-OH	Amino acid and Its metabolites	Small Peptide	C23H19ClN2O7	471.099	470.088	7.3287	[M+H]+	7.35659	2	0.851	rp	-	-	-	65176	-	A	12065.4	13298.4	13406.2	8704.15	7740.89	6900.78	6438.93	6302.7	6290.55	-
T3_positive	MW0152411	Leu-Lys-Ala-Val-Val	Amino acid and Its metabolites	Small Peptide	C25H48N6O6	529.363	528.364	5.8974	[M+H]+	9.04251	2	0.8433	rp	-	-	-	264995	-	A	2382.58	2026.55	2549.02	1651.98	2417.9	2725	2528.13	2521.56	2536.3	-
T3_positive	MW0145354	Arg-Glu-Ser-Leu-Glu	Amino acid and Its metabolites	Small Peptide	C25H44N8O11	633.331	632.313	7.2706	[M+H]+	18.9927	2	0.8431	rp	-	-	-	264281	-	A	3995.23	3528.63	4000.2	2971.6	3140.6	2972.78	3142.61	3101.12	3144.05	-
T3_positive	MW0155411	Phe-Val-Lys-Lys	Amino acid and Its metabolites	Small Peptide	C26H44N6O5	521.336	520.337	6.8754	[M+H]+	16.0251	2	0.8285	rp	-	-	-	142447	-	A	12262.9	10329.6	15898.3	7005.51	7570.96	8277.73	8020.4	8321.25	8145.78	-
T3_positive	MW0157017	Ser-Nap-OH	Amino acid and Its metabolites	Small Peptide	C22H20N2O7	425.131	424.127	6.3198	[M+H]+	4.21586	2	0.8259	rp	-	-	-	65323	-	A	2604.63	2481.82	2858.34	1639.43	1878.63	490.756	3548.77	3512.37	3531.13	-
T3_positive	MW0155229	Phe-Ile-His-Arg	Amino acid and Its metabolites	Small Peptide	C27H41N9O5	572.327	571.323	6.9957	[M+H]+	5.73514	2	0.8209	rp	-	-	-	138413	-	A	9097.16	4578.63	4292.89	4228.29	3973.53	3116.61	4873.27	4975.7	4961.61	-
T3_positive	MW0153110	Lys-Phe-Val-Leu-Val	Amino acid and Its metabolites	Small Peptide	C31H52N6O6	605.415	604.395	7.7468	[M+H]+	22.2575	2	0.8164	rp	-	-	-	264638	-	A	4272.17	4110.41	4758.08	3447.7	3147.51	3627.42	3800.53	3754.53	3799.58	-
T3_positive	MW0144661	Ala-Lys-Gly-Arg-Val	Amino acid and Its metabolites	Small Peptide	C22H43N9O6	530.341	529.334	7.5725	[M+H]+	5.97315	2	0.8123	rp	-	-	-	264128	-	A	92330.5	137554	126771	42996.6	59561.3	61102.1	52263.5	52709	49534	-
T3_positive	MW0144635	Ala-Leu-Gly-Ile-Ser	Amino acid and Its metabolites	Small Peptide	C20H37N5O7	460.273	459.269	7.2582	[M+H]+	5.57824	2	0.8013	rp	-	-	-	264138	-	A	7053.31	6758.83	8777.04	4748.58	6395.31	5926.19	5396.13	5409.6	5225.97	-
T3_positive	MW0151149	His-Val-Ile-Arg	Amino acid and Its metabolites	Small Peptide	C23H41N9O5	524.327	523.323	7.2406	[M+H]+	0.781172	2	0.8	rp	-	-	-	158433	-	A	8116.71	4717.56	4726.76	3415.39	3122.4	4482.91	3591.04	3386.08	3796.72	-
T3_positive	MW0145509	Arg-Thr-Ala-Arg	Amino acid and Its metabolites	Small Peptide	C19H38N10O6	520.326	502.298	3.5139	[M+NH4]+	10.3634	2	0.7999	rp	-	-	-	221893	-	A	2100.27	3624.92	1985.98	1808.2	4364.29	2006.17	5678.44	5703.84	5836.38	-
T3_positive	MW0152912	Lys-Asp-Thr-Lys	Amino acid and Its metabolites	Small Peptide	C20H38N6O8	491.293	490.275	3.7159	[M+H]+	19.8611	2	0.7981	rp	-	-	-	168607	-	A	16753.1	16673.2	15582.6	15457.1	15486.3	16743.4	17141.4	17100.5	17072	-
T3_positive	MW0156821	Ser-Leu-Leu-Ser-Phe	Amino acid and Its metabolites	Small Peptide	C27H43N5O8	566.314	565.311	6.8366	[M+H]+	5.53483	2	0.7952	rp	-	-	-	264440	-	A	8537.89	7860.97	10909.1	4191.83	6074.55	5894.97	4948.95	5162.5	5155.54	-
T3_positive	MW0145405	Arg-Ile-Val-Leu-Val	Amino acid and Its metabolites	Small Peptide	C28H54N8O6	616.455	598.417	7.2406	[M+NH4]+	3.90791	2	0.7944	rp	-	-	-	264930	-	A	8159.24	7609.98	7863.89	6066.7	6422.95	6001.72	6819.49	6816.02	6790.71	-
T3_positive	MW0153185	Lys-Tyr-Thr-Arg	Amino acid and Its metabolites	Small Peptide	C25H42N8O7	584.35	566.318	7.2758	[M+NH4]+	1.86038	2	0.7936	rp	-	-	-	175413	-	A	27318.9	27938.7	26940.9	21251.2	21177.5	19714.6	19740.4	19518.2	19508.4	-
T3_positive	MW0151609	Ile-Thr-Val-Lys-Leu	Amino acid and Its metabolites	Small Peptide	C27H52N6O7	590.418	572.39	7.5552	[M+NH4]+	2.51737	2	0.793	rp	-	-	-	264861	-	A	30715.5	32875	31583.2	25179	25586.8	23437.3	23844.9	23826.1	23561.5	-
T3_positive	MW0145390	Arg-Ile-Glu-Asp	Amino acid and Its metabolites	Small Peptide	C21H37N7O9	532.271	531.265	6.641	[M+H]+	3.93802	2	0.7859	rp	-	-	-	218341	-	A	73364.6	79641.4	77480.3	55106.2	32022.1	26287.7	36616.7	37890.3	36097.1	-
T3_positive	MW0144606	Ala-His-Val-Asp	Amino acid and Its metabolites	Small Peptide	C18H28N6O7	441.204	440.202	6.8722	[M+H]+	8.07081	2	0.7808	rp	-	-	-	106222	-	A	19616.2	20085.7	29172.9	14747.3	19170.4	14644	13966.8	14464.5	13877.5	-
T3_positive	MW0151652	Ile-Val-Lys-Arg-Lys	Amino acid and Its metabolites	Small Peptide	C29H58N10O6	660.481	642.454	7.2296	[M+NH4]+	7.64877	2	0.7776	rp	-	-	-	264170	-	A	3563.63	3280.1	3413.5	2813.52	2976.92	2687.87	4112.19	4156.83	3876.6	-
T3_positive	MW0159029	Val-His-Phe-Glu	Amino acid and Its metabolites	Small Peptide	C25H34N6O7	548.296	530.249	7.9039	[M+NH4]+	13.7444	2	0.7707	rp	-	-	-	241962	-	A	45395.6	13671.3	9682.69	38067.1	35366.2	38651.8	43183.6	42777.2	43298.9	-
T3_positive	MW0159076	Val-Leu-Ser-Pro-Ala	Amino acid and Its metabolites	Small Peptide	C22H39N5O7	503.313	485.285	7.5725	[M+NH4]+	13.7598	2	0.765	rp	-	-	-	264319	-	A	150435	213725	194695	61692.1	89408.2	84964.4	66091	60004.1	67445	-
T3_positive	MW0151151	His-Val-Leu-Lys	Amino acid and Its metabolites	Small Peptide	C23H41N7O5	496.329	495.317	6.7662	[M+H]+	19.9685	2	0.7645	rp	-	-	-	158467	-	A	10583.7	36583.2	41059.7	14237.8	29040.6	28442.5	14464	13328.8	13834	-
T3_positive	MW0144691	Ala-Phe-His-Lys	Amino acid and Its metabolites	Small Peptide	C24H35N7O5	502.285	501.27	6.5639	[M+H]+	6.42603	2	0.7634	rp	-	-	-	105208	-	A	11503.4	35797.2	3156.58	12402.6	12168.5	13853.7	10497.1	9792.48	10478.7	-
T3_positive	MW0105002	(2R)-3-(5-acetamido-2-hydroxyphenyl)sulfanyl-2-azaniumylpropanoate	Amino acid and Its metabolites	Amino acid derivatives	C11H14N2O4S	271.071	270.067	1.6317	[M+H]+	9.23581	2	0.7625	rp	-	40428953	HMDB0240217	-	-	B	10637.1	8339.05	9509.69	7468.33	9293.81	10400.6	9152.11	9152.03	9166.29	-
T3_positive	MW0152193	Leu-Ala-Arg-Glu-Leu	Amino acid and Its metabolites	Small Peptide	C26H48N8O8	601.366	600.36	7.6509	[M+H]+	9.09657	2	0.7625	rp	-	-	-	264872	-	A	45395.6	1784.88	1805.12	38067.1	35366.2	38651.8	43183.6	42777.2	43298.9	-
T3_positive	MW0145260	Arg-Arg-His-Val-Phe	Amino acid and Its metabolites	Small Peptide	C32H51N13O6	713.413	713.409	3.79	[M+]+	2.02257	2	0.7617	rp	-	-	-	264615	-	A	3109.68	2814.4	3080.14	1606.92	2450.01	2568.21	2307.76	2458.73	2364.54	-
T3_positive	MW0145383	Arg-Ile-Arg-Val-Met	Amino acid and Its metabolites	Small Peptide	C28H55N11O6S	673.405	673.406	7.2582	[M+]+	1.67999	2	0.7552	rp	-	-	-	264847	-	A	20262.2	19140	20105.1	16259.1	16292.5	15827.5	15604.7	15545.2	15520.4	-
T3_positive	MW0145340	Arg-Glu-Arg-Val-Tyr	Amino acid and Its metabolites	Small Peptide	C31H51N11O9	721.383	721.387	7.2406	[M+]+	3.94995	2	0.7525	rp	-	-	-	264991	-	A	3102.05	2781.8	3040.55	2244.57	2585.05	2767.84	2837.43	2866.21	2836.3	-
T3_positive	MW0145339	Arg-Glu-Ala-Phe-Arg	Amino acid and Its metabolites	Small Peptide	C29H47N11O8	677.357	677.361	7.2582	[M+]+	5.90109	2	0.7512	rp	-	-	-	264764	-	A	3939.4	3929.03	3895.63	2811.61	3231.76	3266.15	3414.49	3397.98	3379.86	-
T3_positive	MW0151637	Ile-Tyr-Val-Arg	Amino acid and Its metabolites	Small Peptide	C26H43N7O6	550.343	549.327	7.3638	[M+H]+	17.2729	2	0.7348	rp	-	-	-	167433	-	A	10055.1	4698.71	5291.69	4569.93	3979.7	2996.03	5140.06	5095.35	5063.69	-
T3_positive	MW0145420	Arg-Leu-Leu-Pro-Ala	Amino acid and Its metabolites	Small Peptide	C26H48N8O6	586.408	568.37	6.8722	[M+NH4]+	14.6036	2	0.7345	rp	-	-	-	264951	-	A	4560.89	3907.82	4292.01	3305.1	3839.67	3655.62	4107.75	4110.6	4071.71	-
T3_positive	MW0153153	Lys-Thr-Ile-Thr-Leu	Amino acid and Its metabolites	Small Peptide	C26H50N6O8	592.397	574.369	6.8014	[M+NH4]+	12.2413	2	0.726	rp	-	-	-	264659	-	A	4404.05	5013.7	5209.59	3624.42	3864.92	3141.36	2789.37	2864.41	2751.31	-
T3_positive	MW0145724	Asn-Gln-His-Arg	Amino acid and Its metabolites	Small Peptide	C21H35N11O7	554.28	553.272	6.9547	[M+H]+	10.629	2	0.7242	rp	-	-	-	196813	-	A	12720.4	8624.98	9483.91	7424.68	7350.06	6344.75	9335.84	9465.87	9324.66	-
T3_positive	MW0157713	Thr-Leu-Thr-Gly-Lys	Amino acid and Its metabolites	Small Peptide	C22H42N6O8	519.318	518.306	7.1507	[M+H]+	15.436	2	0.7239	rp	-	-	-	264665	-	A	21882.5	14259.7	21743.5	12553.4	15143.2	16992.5	13871.5	13579.1	13786	-
T3_positive	MW0151410	Ile-Glu-Arg-Asp-Phe	Amino acid and Its metabolites	Small Peptide	C30H46N8O10	679.347	678.334	4.1882	[M+H]+	11.58	2	0.7201	rp	-	-	-	264692	-	A	3891.78	4909.84	4586.58	4425.21	5881.85	4757.25	4708.48	4746.39	4707.36	-
T3_positive	MW0153028	Lys-Leu-Asn-His-Gln	Amino acid and Its metabolites	Small Peptide	C27H46N10O8	656.392	638.35	6.6907	[M+NH4]+	12.7444	2	0.7188	rp	-	-	-	264999	-	A	8046.15	7597.78	8094.48	7469.37	7655.49	8153.43	7968.42	7826.55	7883.5	-
T3_positive	MW0155791	Pro-Asn-Asn	Amino acid and Its metabolites	Small Peptide	C13H21N5O6	344.153	343.149	7.2231	[M+H]+	11.2671	2	0.716	rp	-	-	-	16398	-	A	31996.5	31157.1	32045.5	18978.4	21997	15158.4	13128.1	12866.4	12477.6	-
T3_positive	MW0146143	Asp-Ile-Gln-Leu-Arg	Amino acid and Its metabolites	Small Peptide	C27H49N9O9	644.386	643.365	7.6422	[M+H]+	19.2976	2	0.7058	rp	-	-	-	264896	-	A	11884.4	12993.8	13221.6	9477.83	9073.66	7014.22	7329.41	7360.58	7082.3	-
T3_positive	MW0157774	Thr-Phe-Val-Arg	Amino acid and Its metabolites	Small Peptide	C24H39N7O6	522.312	521.296	6.8897	[M+H]+	14.6299	2	0.7023	rp	-	-	-	233433	-	A	10336.5	3441.45	4157.91	4279.61	3598.24	3027.4	5247.86	5390.94	5351.8	-
T3_positive	MW0144480	Ala-Arg-Pro-Lys-Leu	Amino acid and Its metabolites	Small Peptide	C26H49N9O6	606.371	583.381	7.5725	[M+Na]+	2.43323	4	0.9427	rp	-	-	-	264745	-	A	3424.92	4676.22	4932.92	1486.77	2449.97	3174.16	2388.87	2304.79	2283.67	-
T3_negative	MW0108118	Malic acid	Amino acid and Its metabolites	Amino acid derivatives	C4H6O5	133.015	134.022	0.8633	[M-H]-	3.15161	1	0.9603	rp	97-67-6	222656	HMDB0000156	-	C00149	B	103203	93470.9	92821.9	88060.5	90735.2	101376	93771.7	92842.5	92816.9	ko00020,ko00620,ko00630,ko01100,ko01200,ko04742,ko04922,ko04964,ko05200,ko05211,ko05230
T3_negative	MW0108616	2-Acetamido-3-hydroxypropanoic acid	Amino acid and Its metabolites	Amino acid derivatives	C5H9NO4	192.05	147.053	5.0497	[M+HCOO]-	4.1092	2	0.7262	rp	97-14-3	352294	-	96376	-	B	310351	464680	510053	497057	603122	508254	476015	476150	475022	-
T3_negative	MW0147925	Cyclo(L-leucyl-L-leucyl)	Amino acid and Its metabolites	Small Peptide	C12H22N2O2	225.161	226.168	2.8989	[M-H]-	3.07961	3	0.7684	rp	952-45-4	192731	-	-	C20514	A	89387.7	84385.7	86265.5	76579	74971	79979.7	79125.2	78956.4	78788.5	-
T3_negative	MW0157923	Thymopoietin II (32-35)	Amino acid and Its metabolites	polypeptide	C21H40N8O7	551.266	516.302	6.1973	[M+Cl]-	7.73933	4	0.8396	rp	85466-18-8	3033954	-	-	-	A	4647.11	4207.88	6008.39	4755.4	4218.99	4681.63	4676.94	4717.21	4579.18	-
T3_negative	MW0107786	L-Leucine	Amino acid and Its metabolites	Amino acids	C6H13NO2	130.089	131.095	1.4977	[M-H]-	0.490753	1	0.9729	rp	61-90-5	6106	HMDB0000687	24	C00123	A	538721	538845	554986	550244	579797	569007	553723	553745	555523	ko00280,ko00290,ko00970,ko01100,ko01210,ko01230,ko02010,ko04150,ko04974,ko04978,ko05230
T3_negative	MW0108403	N-(2-Furoyl)glycine	Amino acid and Its metabolites	Amino acid derivatives	C7H7NO4	204.005	169.037	0.7876	[M+Cl]-	2.89624	1	0.7193	rp	5657-19-2	21863	HMDB0000439	5428	-	A	28325.1	24666.7	24278.7	22817.4	23298	27590.6	24805.1	24804.1	24725.5	-
T3_negative	MW0107683	L-cystathionine	Amino acid and Its metabolites	Amino acid derivatives	C7H14N2O4S	221.054	222.067	0.7876	[M-H]-	14.7141	1	0.7554	rp	56-88-2	439258	HMDB0000099	39	C02291	A	23029.1	19713.6	18993.2	15173.9	9023.7	20830.6	18255.5	18357.3	18366.5	ko00260,ko00270,ko01100,ko01230,ko01240
T3_negative	FDATN01488	L-Glutamic acid	Amino acid and Its metabolites	Amino acids	C5H9NO4	146.047	147.053	0.8026	[M-H]-	3.35173	1	0.9547	rp	56-86-0	33032	HMDB0000148	-	C00025	A	135216	111577	108762	116714	115792	127234	118186	118536	118540	ko00220,ko00250,ko00330,ko00340,ko00430,ko00470,ko00480,ko00524,ko00630,ko00650,ko00860,ko00910,ko00970,ko01100,ko01200,ko01210,ko01230,ko01240,ko02010,ko04068,ko04072,ko04080,ko04216,ko04540,ko04713,ko04720,ko04721,ko04723,ko04724,ko04727,ko04730,ko04742,ko04964,ko04974,ko05014,ko05016,ko05017,ko05022,ko05030,ko05031,ko05033,ko05034,ko05230
T3_negative	MW0105531	L-Alanine	Amino acid and Its metabolites	Amino acids	C3H7NO2	88.0411	89.0477	0.8026	[M-H]-	1.8	3	0.9304	rp	56-41-7	5950	HMDB0000161	-	C00041	A	8390.7	7266.06	6509.9	7407.26	6801.99	7814.77	8167	8100.2	8164.9	ko00250,ko00270,ko00430,ko00450,ko00470,ko00970,ko01100,ko01200,ko01230,ko02010,ko04122,ko04974,ko04978,ko05230
T3_negative	MW0109206	Phe-his	Amino acid and Its metabolites	Small Peptide	C15H18N4O3	409.117	302.138	2.3792	[M-H]-	5.2237	2	0.7915	rp	33367-37-2	9966159	HMDB0028997	-	-	A	2088.16	4054.63	4426.02	3916.41	2525.27	4073.8	3476.54	3418.3	3638.88	-
T3_negative	MW0169647	Phenylacetylglutamine	Amino acid and Its metabolites	Amino acid derivatives	C13H16N2O4	263.102	264.111	2.6822	[M-H]-	4.28792	2	0.7653	rp	28047-15-6	92258	HMDB0006344	-	C04148	A	27454.7	23362.7	25083.2	23351.7	22522.7	22507	23315.4	23293.2	23216.3	ko00360
T3_negative	MEDP1080	Gly-Trp	Amino acid and Its metabolites	Small Peptide	C13H15N3O3	368.08	261.111	1.9904	[M-H]-	7.11083	2	0.7661	rp	2390-74-1	92181	HMDB0028852	`	-	A	9878.46	7015.75	7208.87	5268.3	6255.7	5865.91	3741.8	4868.39	4441.07	-
T3_negative	MW0105439	Adouetine X	Amino acid and Its metabolites	Amino acid derivatives	C28H44N4O4	499.332	500.336	6.9421	[M-H]-	10.5267	3	0.7042	rp	19542-37-1	5281577	HMDB0034216	-	C09993	B	42299.3	57465.9	60152.9	59780.8	65987.7	72125.4	66468.5	66273.1	64391.7	-
T3_negative	MW0108961	N-omega-Propyl-L-arginine	Amino acid and Its metabolites	Amino acid derivatives	C9H20N4O2	251.13	216.159	6.4684	[M+Cl]-	6.2709	2	0.727	rp	137361-05-8	447180	-	44817	-	B	2282.08	2716.4	2495.67	1910.98	2516.25	2186.09	2825.96	2693.43	2886.01	-
T3_negative	MW0195169	Glutathione Reducedform	Amino acid and Its metabolites	Small Peptide	C10H17N3O6S	306.078	307.084	0.8633	[M-H]-	8.09043	1	0.8912	rp	-	-	-	-	C00051	A	1.74425e+06	1.6849e+06	1.55465e+06	1.79516e+06	1.63857e+06	1.62051e+06	1.4635e+06	1.4443e+06	1.45692e+06	ko00270,ko00480,ko01100,ko01240,ko02010,ko04216,ko04918,ko04976,ko05208,ko05415
T3_negative	MW0110238	L-Tyrosyl-L-Asparagine	Amino acid and Its metabolites	Amino acid derivatives	C13H17N3O5	294.108	295.117	1.5324	[M-H]-	11.6429	1	0.7592	rp	-	44230566	HMDB0029100	-	-	B	5401.78	10136	7290.68	8574.92	9893.25	2930.28	5129.47	7041.51	6488.39	-
T3_negative	MW0108838	N-Methylisoleucine	Amino acid and Its metabolites	Amino acid derivatives	C7H15NO2	144.113	145.11	6.3376	[M-H]-	21.0521	2	0.8317	rp	-	560437	-	44542	-	B	1.61736e+06	1.49575e+06	1.55998e+06	1.35864e+06	1.40196e+06	1.53054e+06	1.41848e+06	1.417e+06	1.42033e+06	-
T3_negative	MW0151676	Isoleucylisoleucine	Amino acid and Its metabolites	Small Peptide	C12H24N2O3	351.154	244.179	2.6558	[M-H]-	4.07016	2	0.7765	rp	-	13879965	HMDB0028910	-	-	A	1888.13	1876.12	1000.85	1325.71	1335.89	1313.74	1368.9	1191.62	1411.56	-
T3_negative	MW0110294	Tyr-Thr	Amino acid and Its metabolites	Small Peptide	C13H18N2O5	281.112	282.122	0.8633	[M-H]-	4.46598	3	0.8064	rp	-	14522584	HMDB0029115	23704	-	B	159593	153510	144925	144613	134254	136432	137624	135941	136768	-
T3_negative	MW0155833	Pro-Gln-Gly	Amino acid and Its metabolites	Small Peptide	C12H20N4O5	299.139	300.143	1.4977	[M-H]-	0.92475	4	0.7274	rp	-	9922356	-	18782	-	A	7148.47	7057.66	8168.5	7363.12	7864.85	7274.42	7758.48	7801.42	7800.56	-
T3_negative	MW0110310	L-Tyrosyl-L-Threonine	Amino acid and Its metabolites	Small Peptide	C13H18N2O5	281.113	282.122	1.3886	[M-H]-	2.90364	1	0.8192	rp	-	25206828	HMDB0029115	65118	-	A	194106	153029	186263	169192	139686	144151	159424	160202	162539	-
T3_negative	MW0155386	Phe-Tyr-Leu-Glu	Amino acid and Its metabolites	Small Peptide	C29H38N4O8	569.265	570.269	3.7015	[M-H]-	3.34693	2	0.7615	rp	-	-	-	143262	-	A	6991.41	3097.68	4529.44	4656.44	4523.39	3853.34	3116.02	3200.01	3046.74	-
T3_negative	MW0145906	Asn-Thr-Ile-Arg	Amino acid and Its metabolites	Small Peptide	C20H38N8O7	501.285	502.286	3.338	[M-H]-	0.217018	2	0.758	rp	-	-	-	198033	-	A	3143.37	2661.6	2606.15	1147.44	2213.62	3054.9	2719.09	2776.58	2723.61	-
T3_negative	MW0152097	L-a-Lysophosphatidylserine	Amino acid and Its metabolites	polypeptide	C24H48NO9P	525.301	525.307	6.2099	[M-]-	12.6943	2	0.7407	rp	-	-	-	34531	-	A	10249.5	13817.9	13180.9	12329.3	9878.32	13217.8	12375.7	12624.7	12583.1	-
T3_negative	MW0153095	Lys-Phe-Glu-Lys	Amino acid and Its metabolites	Small Peptide	C26H42N6O7	549.335	550.312	6.2061	[M-H]-	9.33396	2	0.7299	rp	-	-	-	169147	-	A	2537.89	1202.26	2829.05	1851.56	2329.69	3053.29	1681.02	1811.51	1572.39	-
T3_negative	MW0145971	Asparagylaspartic acid	Amino acid and Its metabolites	Small Peptide	C8H13N3O6	354.053	247.08	4.4502	[M-H]-	13.2017	2	0.7055	rp	-	18218177	-	65047	-	A	167151	202798	215043	200875	237859	224582	201581	202188	201586	-
T3_negative	MW0151078	His-Ser-Gly-Asn-Ile	Amino acid and Its metabolites	Small Peptide	C21H34N8O8	525.247	526.25	6.2022	[M-H]-	1.82461	4	0.9564	rp	-	-	-	264857	-	A	12423	11509.6	13162	10749.5	10261.8	11320.2	10868.9	10948.5	10876.3	-
T3_negative	MW0152336	Leu-Gly-Ala-Pro-Gly	Amino acid and Its metabolites	Small Peptide	C18H31N5O6	412.226	413.227	1.4889	[M-H]-	6.20986	4	0.8665	rp	-	-	-	264176	-	A	34782.3	24011.3	29824.7	31547.8	34610.7	34135.1	35605.7	36288	36070.1	-
HILIC_negative	MW0108634	N-Acetyl-L-aspartic acid	Amino acid and Its metabolites	Amino acid derivatives	C6H9NO5	174.041	175.048	3.5496	[M-H]-	0.644941	1	0.9641	hilic	997-55-7	65065	HMDB0000812	5776	C01042	A	84141.7	84049.2	147270	106280	77655	106291	150441	151548	148118	ko00250,ko01100
HILIC_negative	MEDP0525	N-Acetyl-L-alanine	Amino acid and Its metabolites	Amino acid derivatives	C5H9NO3	190.072	131.058	1.7238	[M+CH3COO]-	0.1	3	0.8915	hilic	97-69-8	88064	HMDB0000766	5733	-	A	7197.34	6461.48	7794.23	4337.97	3877.82	4517.12	6148.35	5823.78	5706.1	-
HILIC_negative	MW0193946	L-Tryptophan	Amino acid and Its metabolites	Amino acids	C11H12N2O2	203.083	204.09	2.1132	[M-H]-	0.441595	1	0.9825	hilic	73-22-3	6305	HMDB0000929	5879	C00078	A	43121.3	46147.3	49960.5	46006	51115.4	49022	46901.8	47180.7	46894.6	ko00260,ko00380,ko00400,ko00970,ko01100,ko01210,ko01230,ko01240,ko04726,ko04974,ko04978,ko05143,ko05230
HILIC_negative	MW0010027	L-Valine	Amino acid and Its metabolites	Amino acids	C5H11NO2	116.072	117.079	2.5495	[M-H]-	1.50385	1	0.8567	hilic	72-18-4	6287	HMDB0000883	5842	C00183	A	15573.1	16477.9	17806.2	18757.3	20731	21159.6	17808.2	18052.8	18042.8	ko00280,ko00290,ko00770,ko00970,ko01100,ko01210,ko01230,ko01240,ko02010,ko04974,ko04978,ko05230
HILIC_negative	MW0106988	Glutamine	Amino acid and Its metabolites	Amino acids	C5H10N2O3	291.131	146.069	3.5395	[2M-H]-	4.18918	1	0.9222	hilic	56-85-9	5961	HMDB0000641	5614	C00064	A	907.221	540.44	545.222	387.245	535.074	468.012	1075.04	1090.72	1072.65	ko00220,ko00230,ko00240,ko00250,ko00470,ko00630,ko00750,ko00910,ko00970,ko01100,ko01230,ko01232,ko01240,ko02010,ko04724,ko04727,ko04964,ko04974,ko04978,ko05230
HILIC_negative	MW0105914	L-Aspartic acid	Amino acid and Its metabolites	Amino acids	C4H7NO4	132.03	133.037	3.9101	[M-H]-	0.0808869	1	0.9701	hilic	56-84-8	5960	HMDB0000191	5206	C00049	A	4419.64	6172.08	7864.92	8352.23	6850.68	6713.3	8954.56	9623.18	9815.42	ko00220,ko00250,ko00260,ko00270,ko00340,ko00410,ko00470,ko00760,ko00770,ko00970,ko01100,ko01200,ko01210,ko01230,ko01240,ko02010,ko04080,ko04974,ko05230
HILIC_negative	MW0109669	L-Serine	Amino acid and Its metabolites	Amino acids	C3H7NO3	104.035	105.043	3.5857	[M-H]-	0.713574	1	0.9371	hilic	56-45-1	5951	HMDB0000187	5203	C00065	A	19665.5	17937.3	19894.4	17079.9	16622.5	18667.4	18439.5	18526.8	18437.8	ko00260,ko00270,ko00470,ko00564,ko00600,ko00630,ko00920,ko00970,ko01100,ko01200,ko01230,ko01240,ko02010,ko04071,ko04974,ko04978,ko05230
HILIC_negative	MEDN1387	O-acetyl-L-serine	Amino acid and Its metabolites	Amino acid derivatives	C5H9NO4	146.046	147.053	1.9456	[M-H]-	0.342789	1	0.928	hilic	5147-00-2	99478	HMDB0003011	3270	C00979	A	112362	100455	85591.5	66927.1	60338.5	71813.9	74619.8	76627.7	73895.9	ko00270,ko00920,ko01100,ko01200,ko01230,ko04122
HILIC_negative	MEDN0061	N-Phenylacetylglycine	Amino acid and Its metabolites	Amino acid derivatives	C10H11NO3	192.066	193.074	1.2375	[M-H]-	0.0548241	1	0.9211	hilic	500-98-1	68144	HMDB0000821	4237	C05598	A	7253.83	6871.51	8100.15	6907.36	7303.45	7405.23	7428.56	7426.4	7362.66	ko00360
HILIC_negative	MEDN1363	l-Alanyl-l-glutamine	Amino acid and Its metabolites	Small Peptide	C8H15N3O4	216.099	217.106	2.9481	[M-H]-	0.376989	1	0.9323	hilic	39537-23-0	123935	HMDB0028685	-	-	A	18108.2	20071	26155.8	21297.9	25899.8	26328.4	22232.1	22196.2	22225.5	-
HILIC_negative	MW0107023	Glu-Tyr	Amino acid and Its metabolites	Small Peptide	C14H18N2O6	369.118	310.116	2.6039	[M+CH3COO]-	20.1906	1	0.7032	hilic	3422-39-7	515717	HMDB0028831	23927	-	A	7478.93	7013.81	17996.2	19173.5	28285.6	14135.5	12209.8	12440.6	12027.3	-
HILIC_negative	MW0116742	1,7-Dimethyluric acid	Amino acid and Its metabolites	Amino acid derivatives	C7H8N4O3	231.024	196.06	2.2961	[M+Cl]-	13.6	3	0.7864	hilic	33868-03-0	91611	HMDB0011103	-	C16356	A	3396.28	1742.76	1382.07	5771.64	3231.38	7039.91	2473.43	2231.3	2591.43	ko00232,ko01100
HILIC_negative	MW0016406	Carnosine	Amino acid and Its metabolites	Amino acid derivatives	C9H14N4O3	225.099	226.107	4.29	[M-H]-	0.664488	1	0.8539	hilic	305-84-0	439224	HMDB0000033	38	C00386	A	7713.66	8021.94	7099.61	6484.98	8261.93	7324.46	6180.38	6254.21	6063.6	ko00340,ko00410,ko01100
HILIC_negative	MW0108500	N,N-dimethylarginine	Amino acid and Its metabolites	Amino acid derivatives	C8H18N4O2	201.136	202.143	5.8116	[M-H]-	0.2	3	0.7485	hilic	30315-93-6	123831	HMDB0001539	6309	C03626	A	3442.11	3514.99	3759.56	3207.91	3142.07	2916.77	3478.89	3415.81	3475.26	-
HILIC_negative	MW0109026	Oxiglutatione	Amino acid and Its metabolites	Small Peptide	C20H32N6O12S2	611.145	612.152	5.0078	[M-H]-	3.20505	1	0.9711	hilic	27025-41-8	65359	HMDB0003337	-	C00127	A	166707	131607	132855	132443	114899	140906	150745	149918	147039	ko00480,ko01100,ko01240,ko04216,ko04918,ko05208,ko05415
HILIC_negative	MW0109263	dl-O-Phosphoserine	Amino acid and Its metabolites	Amino acid derivatives	C3H8NO6P	184.002	185.009	3.7298	[M-H]-	0.942359	2	0.7946	hilic	17885-08-4	106	HMDB0001721	6338	C01005	A	17805.9	15805.5	20624.6	20567.4	18827.4	24837	22340.8	22535	22848.5	ko00260,ko00270,ko00970,ko01100,ko01200,ko01230
HILIC_negative	MW0169367	L-Proline	Amino acid and Its metabolites	Amino acids	C5H9NO2	114.056	115.063	2.8215	[M-H]-	0.0209454	1	0.9727	hilic	147-85-3	145742	HMDB0000162	29	C00148	A	22554.4	20012.1	21865.7	22431.3	21707.3	26560.9	22049.4	22071.7	22051.3	ko00330,ko00470,ko00970,ko01100,ko01230,ko02010,ko04974,ko04978,ko05230
HILIC_negative	MW0108236	Met-Tyr	Amino acid and Its metabolites	Small Peptide	C14H20N2O4S	401.078	312.114	1.197	[M-H2O-H]-	3.74404	2	0.7205	hilic	13589-04-3	7009558	HMDB0028985	23957	-	A	182665	156489	114648	157851	145202	102585	153198	140239	151258	-
HILIC_negative	MW0008802	N-Acetyl-Neuraminic Acid	Amino acid and Its metabolites	Amino acid derivatives	C11H19NO9	308.099	309.106	3.3123	[M-H]-	1.97055	1	0.9616	hilic	131-48-6 | 489-46-3	439197	HMDB0000230	-	C00270	A	95261.4	86822.9	95218.8	58636.9	57122.2	63008.4	78678.6	74729	73231.2	ko00520,ko01100,ko01250
HILIC_negative	MEDP0291	3,7-Dimethyluric acid	Amino acid and Its metabolites	Amino acid derivatives	C7H8N4O3	231.024	196.06	1.9471	[M+Cl]-	13.85	3	0.8431	hilic	13087-49-5	83126	HMDB0001982	-	C16360	A	6311.24	5189.02	5152.01	5935.44	7031.23	6266.32	5197.09	5122.26	5202.52	ko00232
HILIC_negative	MW0109791	Taurine	Amino acid and Its metabolites	Amino acids	C2H7NO3S	124.007	125.015	2.4591	[M-H]-	0.278389	1	0.933	hilic	107-35-7	1123	HMDB0000251	31	C00245	A	65626.6	65689.4	68711.5	67494.5	76474	77818.9	65568.9	66129.7	66163.2	ko00120,ko00430,ko00920,ko01100,ko02010,ko04080
HILIC_negative	MEDN1666	N-Acetyglutamic acid	Amino acid and Its metabolites	Amino acid derivatives	C7H11NO5	188.057	189.064	3.4584	[M-H]-	1.562	1	0.9751	hilic	-	-	-	-	-	B	40687.4	36999.4	39711.5	30223.4	26392.3	34541.7	39529.1	39543.6	36186.4	-
HILIC_negative	MW0108651	N-acetylornithine	Amino acid and Its metabolites	Amino acid derivatives	C7H14N2O3	173.093	174.1	3.258	[M-H]-	0.585956	1	0.7737	hilic	-	439232	HMDB0003357	-	C00437	A	2299.66	2306.65	2282.21	1767.33	2276.72	1960.13	1977.48	1907.7	1883.8	ko00220,ko01100,ko01210,ko01230
HILIC_negative	MW0158449	Tyr-Glu-Arg-Arg	Amino acid and Its metabolites	Small Peptide	C26H42N10O8	621.303	622.319	1.3788	[M-H]-	10.4909	2	0.8702	hilic	-	-	-	256973	-	A	10373.1	6585.98	9370.2	7539.54	5268.21	7199.56	6898.15	6877.87	6827.84	-
HILIC_negative	MW0150910	His-Gln-Val-Lys	Amino acid and Its metabolites	Small Peptide	C22H38N8O6	509.288	510.291	0.9104	[M-H]-	9.86597	2	0.8188	hilic	-	-	-	157027	-	A	52735.2	44059.5	49118	42467.6	43621.8	53866.4	44697.3	44143.1	44675.2	-
HILIC_negative	MW0107687	S-Glutathionyl-L-cysteine	Amino acid and Its metabolites	Small Peptide	C13H22N4O8S2	425.079	426.088	4.6851	[M-H]-	3.35731	2	0.7769	hilic	-	10455148	-	-	C05526	A	23051.5	21067.5	21086.7	19069.3	18889.1	21926.9	21730.4	21438	21276.5	ko00270,ko01100
HILIC_negative	MW0115000	L-Formylkynurenine	Amino acid and Its metabolites	Amino acid derivatives	C11H12N2O4	276.101	236.08	2.1132	[M-H+CH3CN]-	7.175	3	0.7705	hilic	-	439788	HMDB0060485	-	C02700	A	2952.72	1586.66	3185.65	2621.07	2710.04	3115.95	2686.54	2743.5	2882.03	ko00380,ko01100,ko01240
HILIC_negative	MW0108467	N-(Carbomethoxyacetyl)-4-S-chlorotryptophan	Amino acid and Its metabolites	Amino acid derivatives	C15H15ClN2O5	373.045	338.067	0.8006	[M+Cl]-	2.6265	4	0.9385	hilic	-	131751010	HMDB0030398	-	-	B	2654.63	2312.74	3258.91	1856.91	2284.58	3195.26	10801.9	10876.1	10888.4	-
HILIC_negative	MW0150266	Glu-Leu-Asp-Lys-Trp-Ala	Amino acid and Its metabolites	Small Peptide	C35H52N8O11	759.369	760.376	4.0354	[M-H]-	5.84602	4	0.8733	hilic	-	10190700	-	-	-	A	52455.9	48097.3	51630.6	40412.2	39752.5	46060.7	46599.7	46600.3	46284	-
HILIC_negative	MW0106766	gamma-Glutamyl-beta-cyanoalanine	Amino acid and Its metabolites	Amino acids	C9H13N3O5	242.078	243.085	2.0581	[M-H]-	1.1985	4	0.7209	hilic	-	53297342	HMDB0060478	-	C05711	A	26816.5	20537.5	22162.6	21137.3	17466.3	27628.9	22348	22451.8	22323.1	-
HILIC_negative	MW0157574	Thr-Asn-Lys-Glu	Amino acid and Its metabolites	Small Peptide	C19H34N6O9	489.233	490.239	1.2154	[M-H]-	2.44053	2	0.9331	hilic	-	-	-	236042	-	A	22700.7	17882.3	25895.3	19577.2	26384.6	17922.6	20380	21013.3	20148.5	-
HILIC_negative	MW0151470	Ile-Ile-Glu-Glu-Val	Amino acid and Its metabolites	Small Peptide	C27H47N5O10	600.324	601.332	1.4492	[M-H]-	3.71368	2	0.8894	hilic	-	-	-	264787	-	A	9250.22	7362.99	8913.18	6356.45	5038.4	8257.61	7303.4	7202.43	7196.17	-
HILIC_negative	MW0155355	Phe-Thr-Lys-Lys	Amino acid and Its metabolites	Small Peptide	C25H42N6O6	521.314	522.317	1.105	[M-H]-	11.3761	2	0.8609	hilic	-	-	-	142047	-	A	17267.6	6583.05	8305.65	6986.72	8669.88	16362	8650.65	8523.84	8645.44	-
HILIC_negative	MW0156712	Ser-Gln-Leu-Lys	Amino acid and Its metabolites	Small Peptide	C20H38N6O7	473.283	474.28	0.7819	[M-H]-	24.6097	2	0.784	hilic	-	-	-	228867	-	A	108160	104259	90543.3	91244.1	80246.3	101342	77400.9	76297	76508.1	-
HILIC_negative	MW0152621	Leu-Phe4Cl-OH	Amino acid and Its metabolites	Small Peptide	C20H21ClN2O6	419.106	420.109	3.2034	[M-H]-	7.21726	2	0.7468	hilic	-	-	-	64969	-	A	17575.9	11142.8	10681.4	2041.04	28344.9	4397.02	12187.3	12263.1	11639.8	-
HILIC_negative	MW0157845	Thr-Tyr-Leu-Glu	Amino acid and Its metabolites	Small Peptide	C24H36N4O9	523.249	524.248	3.8372	[M-H]-	12.5133	2	0.7145	hilic	-	-	-	239262	-	A	45731.6	58193	67151.6	64306.7	92508.9	73138.9	61419.1	60376.1	58421	-
HILIC_negative	MW0152242	Leu-Asn-Arg-Glu	Amino acid and Its metabolites	Small Peptide	C21H38N8O8	529.282	530.281	0.8188	[M-H]-	12.6778	2	0.7141	hilic	-	-	-	180162	-	A	212995	451954	305676	134507	156289	427533	235354	232951	235931	-
T3_positive	MW0009085	Nifuroxazide	Benzene and substituted derivatives	Benzene and substituted derivatives	C12H9N3O5	293.087	275.054	2.3374	[M+NH4]+	0.288009	1	0.7472	rp	965-52-6	5337997	-	-	-	B	672.544	743.644	467.862	148.42	520.847	135.863	2388.11	2429.86	2454.75	-
T3_positive	MW0008591	3-bromo-N,N-dipropyl-5-(trifluoromethyl)benzenesulfonamide	Benzene and substituted derivatives	Benzene and substituted derivatives	C13H17BrF3NO2S	390.019	389.01	1.7382	[M+H]+	1.30975	4	0.7183	rp	957062-78-1	26985672	-	-	-	B	4708.44	3264.02	3778.2	2588.8	2664.06	4061.44	3231.99	3210.36	3210.91	-
T3_positive	MW0006458	Butylparaben	Benzene and substituted derivatives	Benzene and substituted derivatives	C11H14O3	195.099	194.094	6.819	[M+H]+	2.77213	1	0.8152	rp	94-26-8	7184	HMDB0032575	-	-	A	16846.7	18201.2	18288	13038.5	15692.9	14700.5	14992.7	15111	15107.8	-
T3_positive	MW0007818	Milnacipran	Benzene and substituted derivatives	Benzene and substituted derivatives	C15H22N2O	269.162	246.173	3.7159	[M+Na]+	1.4144	2	0.7629	rp	92623-85-3	65833	HMDB0015602	-	-	B	4245.14	3093.23	2967.9	3910.17	2783.56	3418.53	3063.49	3043.11	3070.3	-
T3_positive	MW0013871	3-[(E)-[(3aR,4S,5S,6aR)-4-[(E,3R)-3-cyclohexyl-3-hydroxyprop-1-enyl]-5-hydroxy-3,3a,4,5,6,6a-hexahydro-1H-pentalen-2-ylidene]methyl]benzoic acid	Benzene and substituted derivatives	Benzene and substituted derivatives	C25H32O4	361.215	396.23	4.2493	[M+H-2H2O]+	1.47338	2	0.8939	rp	89955-40-8	6439874	-	45349	-	B	5361.41	6185.16	5732.3	3358.01	7019.1	4256.66	5878.57	5875.92	5941.26	-
T3_positive	MW0007144	Ferimzone	Benzene and substituted derivatives	Benzene and substituted derivatives	C15H18N4	255.153	254.153	5.9944	[M+H]+	18.3538	2	0.8264	rp	89269-64-7	9013425	-	-	C18579	B	3243.57	3093.86	3494.17	2939.4	2879.57	3391.35	4514.7	4496.46	4505.64	-
T3_positive	MW0004571	4-(4-Chloro-phenylsulfanylmethyl)-benzoic acid	Benzene and substituted derivatives	Benzene and substituted derivatives	C14H11ClO2S	316.979	278.017	0.5859	[M+K]+	2.07025	4	0.7008	rp	88382-51-8	366613	-	-	-	B	4946.6	5113.2	4852.64	4525.75	836.911	3682.78	4639.3	4664.19	4641.35	-
T3_positive	MW0154784	O-Toluenesulfonamide	Benzene and substituted derivatives	Benzene and substituted derivatives	C7H9NO2S	136.019	171.035	5.1839	[M+H-2H2O]+	4.6551	2	0.7392	rp	88-19-7 | 8013-74-9	6924	-	3056	-	B	3654.96	2863.79	3446.99	3087.51	2728.91	3238.17	3431.04	3456.21	3438.33	-
T3_positive	MW0120916	5-(Trifluoromethyl)-1,2-Benzoxazol-3-Amine	Benzene and substituted derivatives	Benzene and substituted derivatives	C8H5F3N2O	225.032	202.035	0.0532	[M+Na]+	1.50625	4	0.7137	rp	868271-14-1	43811099	-	-	-	B	14566	15141.4	2380.02	1525.37	5618.59	5740.59	4883	6040.72	5840.3	-
T3_positive	MW0006996	Esprocarb	Benzene and substituted derivatives	Benzene and substituted derivatives	C15H23NOS	283.187	265.15	6.5209	[M+NH4]+	4.36458	2	0.7548	rp	85785-20-2	91740	-	-	-	B	13003.6	13844.9	11680.4	17316.9	15802.9	5572.49	7278.42	7949.53	7892.08	-
T3_positive	MW0125188	Mirtazapine	Benzene and substituted derivatives	Benzene and substituted derivatives	C17H19N3	266.169	265.158	5.382	[M+H]+	10.6389	1	0.7389	rp	85650-52-8 | 61337-67-5 | 207516-99-2	4205	HMDB0014514	43259	C07570	B	8938.96	7205.11	7986.93	6981.05	7353.39	7818.38	9126.17	9184	9173.37	-
T3_positive	MW0004810	4'-Chloro-2-hydroxy-4-methoxybenzophenone	Benzene and substituted derivatives	Benzene and substituted derivatives	C14H11ClO3	301.005	262.04	0.5864	[M+K]+	0.82	4	0.9799	rp	85-28-9	66557	-	-	-	B	14276.7	13121.7	15054.4	11375	12862.3	14506.9	13408.1	13188.8	13375.5	-
T3_positive	MEDL01942	Dibutyl phthalate	Benzene and substituted derivatives	Benzene and substituted derivatives	C16H22O4	279.155	278.152	7.3435	[M+H]+	7.11434	1	0.958	rp	84-74-2	3026	HMDB0033244	-	C14214	A	18798	15524.8	15045.9	11625.8	12882	9715.4	8865.52	8732.56	8690.28	-
T3_positive	MW0141787	1-Methylphenanthrene	Benzene and substituted derivatives	Benzene and substituted derivatives	C15H12	193.1	192.094	2.5441	[M+H]+	2.251	4	0.9468	rp	832-69-9	13257	-	-	C19457	B	186202	159058	178544	125787	153048	173572	168536	168251	168317	-
T3_positive	ZINC95914325	Phlogacanathoside B	Benzene and substituted derivatives	Benzene and substituted derivatives	C26H36O9	510.26	492.236	6.2218	[M+NH4]+	0.136317	4	0.7466	rp	830347-19-8	11167789	-	-	-	B	23784.9	20424.1	21893.5	15569.2	18384.3	18289.3	18054.4	18054.8	18101.4	-
T3_positive	MW0006243	Benzofenap	Benzene and substituted derivatives	Benzene and substituted derivatives	C22H20Cl2N2O3	431.091	430.085	6.2037	[M+H]+	4.87813	4	0.8918	rp	82692-44-2	94686	HMDB0041340	-	C18555	B	47867.2	40733.4	46071.3	33295.8	41237.3	44411.4	43021.9	43210.9	43323	-
T3_positive	MW0006357	Bifenthrin	Benzene and substituted derivatives	Benzene and substituted derivatives	C23H22ClF3O2	445.114	422.126	7.0832	[M+Na]+	0.544976	2	0.7464	rp	82657-04-3	5281872	-	-	-	B	107303	8652.43	128772	74025.7	2440.81	3344.25	75561.8	75787.7	73380.4	-
T3_positive	MW0154276	1,8-Naphthalic anhydride	Benzene and substituted derivatives	Benzene and substituted derivatives	C12H6O3	236.992	198.032	1.085	[M+K]+	1.73525	4	0.7084	rp	81-84-5 | 34314-32-4	6693	-	-	C19125	B	5313.61	4905.08	3843.91	2791.67	4109.83	3433.08	2189.66	2506.68	2442.9	-
T3_positive	MW0001514	Red Violet 2RN Acid Anthraquinone	Benzene and substituted derivatives	Benzene and substituted derivatives	C21H13NO4	326.078	343.084	1.4489	[M+H-H2O]+	9.00108	2	0.7354	rp	81-79-8	222169	-	96354	-	B	6447.64	6821.65	6342.61	5303.93	6144.91	7092.09	7516.16	7571.14	7296.73	-
T3_positive	MW0107123	Roxadustat	Benzene and substituted derivatives	Benzene and substituted derivatives	C19H16N2O5	353.113	352.106	3.9435	[M+H]+	1.23953	2	0.7166	rp	808118-40-3	11256664	-	-	-	B	61028.2	90391.6	99637.5	39193.4	113867	91939.8	93960.5	93779.3	93818.7	-
T3_positive	MW0009992	Triphenylphosphine oxide	Benzene and substituted derivatives	Benzene and substituted derivatives	C18H15OP	279.09	278.086	6.0636	[M+H]+	7.64962	2	0.8754	rp	791-28-6	13097	-	64889	-	B	95328.1	85485	90365.4	82298.9	82624.5	85354.1	84805.2	85211.2	85215	-
T3_positive	MEDN1864	CAY-10487	Benzene and substituted derivatives	Benzene and substituted derivatives	C13H15NO5	304.063	265.095	0.8676	[M+K]+	2.55675	4	0.94	rp	778624-05-8	23659588	-	-	-	B	23557	20209.5	23986.7	17325.4	19849.2	21321.4	21280	21369.1	21281.3	-
T3_positive	MW0108345	Monoethylglycinexylidide	Benzene and substituted derivatives	Benzene and substituted derivatives	C12H18N2O	291.117	206.142	2.9544	[M+K+HCOOH]+	15.65	3	0.7239	rp	7728-40-7	24415	HMDB0060656	-	C16561	B	1229.65	2562.91	2225.62	1891.28	3296.57	1347.47	1788.65	1893.22	1749.86	ko00982
T3_positive	MW0009632	Quizalofop-ethyl	Benzene and substituted derivatives	Benzene and substituted derivatives	C19H17ClN2O4	395.076	372.088	6.4053	[M+Na]+	3.288	4	0.9242	rp	76578-14-8	53518	-	-	C18530	B	19406	131206	191114	99878.3	109386	83333	138462	146504	145595	-
T3_positive	MW0001651	1-N-(pyrimidin-2-yl)benzene-1,4-diamine	Benzene and substituted derivatives	Benzene and substituted derivatives	C10H10N4	209.079	186.09	4.4375	[M+Na]+	1.134	4	0.7224	rp	743449-54-9	21653136	-	-	-	B	2048.93	1349.06	1541.59	520.052	1312.47	1795.31	1824.38	1787.81	1821.02	-
T3_positive	MW0007213	Formoterol	Benzene and substituted derivatives	Benzene and substituted derivatives	C19H24N2O4	345.179	344.174	1.5144	[M+H]+	0.9815	4	0.7261	rp	73573-87-2 | 128954-45-0 | 126587-85-7	3410	HMDB0015118	-	C07805	B	1673.54	3058.32	2466.73	2859.96	2895.74	2990.37	2699.79	2725.77	2746.21	-
T3_positive	MW0156102	Propaphos	Benzene and substituted derivatives	Benzene and substituted derivatives	C13H21O4PS	327.076	304.09	0.8676	[M+Na]+	2.0425	4	0.7015	rp	7292-16-2	23717	-	-	C19013	B	5429.38	4902.88	5187.09	1873.5	4292.86	4700.01	4661.42	4696.26	4682.27	-
T3_positive	MW0109192	Phenyl dihydrogen phosphate	Benzene and substituted derivatives	Benzene and substituted derivatives	C6H7O4P	175.016	174.008	1.3912	[M+H]+	1.91362	2	0.7254	rp	701-64-4	12793	-	-	C02734	A	45401.5	43847.6	52331.8	36844.3	29217.2	38472.2	36476.8	36501.3	35995.6	-
T3_positive	MW0009272	Ormetoprim	Benzene and substituted derivatives	Benzene and substituted derivatives	C14H18N4O2	275.142	274.143	2.9544	[M+H]+	19.9939	2	0.7541	rp	6981-18-6	23418	-	-	-	B	8297.16	8727.75	7300.81	5701.41	11315.2	6215.01	8616.81	8577.68	8600.01	-
T3_positive	MW0000881	3-Carboxymethylbenzanthrone	Benzene and substituted derivatives	Benzene and substituted derivatives	C19H12O3S	359.012	320.051	1.4888	[M+K]+	1.7875	4	0.7073	rp	69658-13-5	50603	-	-	-	B	6413.13	4152.2	5334.89	3453.86	2464.6	2888.04	3825.31	3789.15	3764.1	-
T3_positive	MW0146686	Betamethasone 9,11-epoxide 17,21-dipropionate	Benzene and substituted derivatives	Phenolic acids	C28H36O7	485.247	484.246	6.7208	[M+H]+	0.214147	4	0.7447	rp	66917-44-0	22821921	-	-	-	B	2670.34	2362.33	3354.64	1871.49	1972.3	2489.67	2270.37	2269.86	2215.65	-
T3_positive	MW0009199	Pivalanilide	Benzene and substituted derivatives	Benzene and substituted derivatives	C11H15NO	178.12	177.115	4.7766	[M+H]+	5.78604	2	0.7588	rp	6625-74-7	81103	-	44986	-	B	14134.4	14026.6	14619.2	13456.9	13094.2	14049.4	14036.5	14134.5	14041.2	-
T3_positive	MW0004696	4-Bromo-2,5-dimethoxyphenethylamine	Benzene and substituted derivatives	Benzene and substituted derivatives	C10H14BrNO2	277.052	259.021	0.5864	[M+NH4]+	1.97475	4	0.703	rp	66142-81-2	98527	-	-	-	B	1120.61	1872.96	1952.33	1611.33	1436.29	2193.89	1899.11	1866.96	1897.13	-
T3_positive	MEDP1600	4-Propylphenol	Benzene and substituted derivatives	Benzene and substituted derivatives	C9H12O	119.084	136.089	6.6318	[M+H-H2O]+	4.33836	1	0.7697	rp	645-56-7	12580	HMDB0032625	-	C14311	A	88984.7	94920.8	106773	75137.2	63075.3	53690.5	78040.8	77926.3	76390.5	-
T3_positive	MW0142570	2-Pyrrolidinone, 5-((1E,3R)-4,4-difluoro-3-hydroxy-4-phenyl-1-butenyl)-1-(6-(1H-tetrazol-5-yl)hexyl)-, (5R)-	Benzene and substituted derivatives	Benzene and substituted derivatives	C21H27F2N5O2	442.206	419.213	6.8542	[M+Na]+	6.64862	2	0.8478	rp	634193-54-7	11316084	-	45077	-	B	2088.46	3504.54	5616.75	2574.58	3239.14	4358.16	2774.96	2783.2	2635.31	-
T3_positive	MW0126493	Ethanethioic acid, S-[2-(2-benzothiazolylamino)-2-oxoethyl] ester	Benzene and substituted derivatives	Benzene and substituted derivatives	C11H10N2O2S2	284.044	266.018	0.5864	[M+NH4]+	0.9225	4	0.7275	rp	63123-39-7	112568	-	-	-	B	5410.08	5145.79	5575.22	4020.46	4534.21	5529.34	5094.29	5115.21	5117.65	-
T3_positive	MEDN0739	4-Hydroxybenzyl alcohol	Benzene and substituted derivatives	Benzene and substituted derivatives	C7H8O2	107.047	124.052	2.1047	[M+H-H2O]+	4.575	3	0.8088	rp	623-05-2	125	HMDB0011724	-	C17467	A	6674.81	6747.62	7671.38	5528.73	7682	7603.46	7216.21	7228.09	7232.33	-
T3_positive	MW0104770	2-Hydroxycinnamic acid	Benzene and substituted derivatives	Phenolic acids	C9H8O3	165.052	164.047	1.4426	[M+H]+	6.60367	1	0.8619	rp	614-60-8	637540	HMDB0002641	6727	C01772	A	126083	128142	123045	132490	132469	135042	128706	128782	128990	ko00360,ko01100
T3_positive	MW0001042	1-(Pentan-3-YL)-4-[(2,3,4-trimethoxyphenyl)methyl]piperazine	Benzene and substituted derivatives	Benzene and substituted derivatives	C19H32N2O3	354.281	336.241	6.978	[M+NH4]+	14.2675	4	0.745	rp	5996-82-7	787035	-	-	-	B	32794.6	33174.1	36421.5	24089	23355.8	20602.8	23083.1	22843.7	22754.7	-
T3_positive	Lmmp003091	Multinoside A	Benzene and substituted derivatives	Benzene and substituted derivatives	C27H30O16	633.144	610.153	7.869	[M+Na]+	0.631153	4	0.9845	rp	59262-54-3	5319943	HMDB0037935	-	C17563	B	188081	3624.24	10789.7	105146	2380.02	3366.45	71239.2	68181.7	70652.6	-
T3_positive	MW0009752	S-Methyl benzenecarbothioate	Benzene and substituted derivatives	Benzene and substituted derivatives	C8H8OS	175.021	152.03	1.6383	[M+Na]+	1.036	4	0.7248	rp	5925-68-8	80024	HMDB0029694	-	-	B	1661.82	1996.7	3358.13	1631.94	5487.51	6137.08	4381.58	4186.69	4427.31	-
T3_positive	MW0009050	Neostigmine	Benzene and substituted derivatives	Benzene and substituted derivatives	C12H19N2O2+	223.151	223.145	3.1163	[M+H]+	18.0896	2	0.7248	rp	59-99-4	4456	HMDB0015472	-	C07258	B	4934.23	4516.6	5418.94	2566.69	3962.15	3316.58	4261.49	4242.47	4243.28	-
T3_positive	MEDP1825	Dihydrokavain	Benzene and substituted derivatives	Benzene and substituted derivatives	C14H16O3	233.108	232.11	6.7117	[M+H]+	22.2867	1	0.7224	rp	587-63-3	10220256	HMDB0029504	-	-	B	15230.6	13045.4	12547.6	10546.1	10684.2	11074.3	10720.3	10732	10652.3	-
T3_positive	MW0118914	2-undecyl-1H-benzimidazole	Benzene and substituted derivatives	Benzene and substituted derivatives	C18H28N2	311.181	272.225	6.5209	[M+K]+	0.6225	4	0.9847	rp	5851-51-4	459455	-	-	-	B	11313.7	11753.9	13083.8	6780.15	8996.16	10104.3	8147.84	8228.71	8150.66	-
T3_positive	MW0120983	5,6-Dimethylbenzimidazole	Benzene and substituted derivatives	Benzene and substituted derivatives	C9H10N2	147.089	146.084	4.9263	[M+H]+	4.53815	1	0.7631	rp	582-60-5	675	HMDB0003701	-	C03114	A	22510.8	23992.8	29832.2	21020	19874.4	19361.9	25941.9	25520.5	25014.5	ko00740,ko00860,ko01100,ko01240
T3_positive	MW0002352	2,5-Dimethylbenzaldehyde	Benzene and substituted derivatives	Benzene and substituted derivatives	C9H10O	135.078	134.073	6.6318	[M+H]+	5.71604	2	0.8407	rp	5779-94-2	22015	-	265044	-	B	30149.9	32933.7	31234.3	23175	19541	17692	24806.9	25173.1	25191.5	-
T3_positive	MW0142278	2-Chloro-(1,1'-biphenyl)-4,4'-diol	Benzene and substituted derivatives	Benzene and substituted derivatives	C12H9ClO2	243.017	220.029	0.5864	[M+Na]+	0.26825	4	0.7433	rp	56858-70-9	134445	-	-	-	B	11297.8	8644.42	11249.1	8158.03	9149.53	11560	10381.7	10539.6	10371.8	-
T3_positive	MW0001095	1-(3,4-dichlorobenzyl)-1H-imidazole	Benzene and substituted derivatives	Benzene and substituted derivatives	C10H8Cl2N2	248.994	226.006	5.2036	[M+Na]+	1.13425	4	0.7224	rp	56643-72-2	2985081	-	-	-	B	1661.26	2629.55	2340.67	1733.01	415.158	1599.64	2014.24	1861.84	1989.44	-
T3_positive	MW0004236	3-Methoxytyramine	Benzene and substituted derivatives	Phenolics	C9H13NO2	168.089	167.095	2.1221	[M+H]+	12.1601	1	0.7739	rp	554-52-9	1669	HMDB0000022	5094	C05587	A	4919.32	5296.77	3970.34	1385.86	5509.81	2930.37	4334.07	4221.15	4081.98	ko00350,ko01100,ko04728
T3_positive	MEDL02295	Hordenine	Benzene and substituted derivatives	Phenolics	C10H15NO	204.084	165.115	1.4174	[M+K]+	12.8598	1	0.7188	rp	539-15-1	68313	HMDB0004366	7055	C06199	B	13422	15559.7	12197.6	14218.2	10875.6	13075.8	12564	12373.7	12361.7	ko00350,ko01100
T3_positive	MW0000519	Methamphetamine	Benzene and substituted derivatives	Benzene and substituted derivatives	C10H15N	337.197	149.12	7.5725	[2M+K]+	18.25	3	0.7499	rp	537-46-2	10836	HMDB0015517	-	C07164	B	29913.6	43722.1	40921.1	11714.8	19889.5	19699.3	15376.1	15500.3	14624.8	-
T3_positive	MW0008204	N-(3-fluoro-4-methylphenyl)hydrazinecarbothioamide	Benzene and substituted derivatives	Benzene and substituted derivatives	C8H10FN3S	217.09	199.058	0.5859	[M+NH4]+	0.13425	4	0.7467	rp	51707-40-5	4645046	-	-	-	B	647.347	1867.17	2388.69	1139.41	1319.25	1879.28	1883.71	1729.4	1523.85	-
T3_positive	MW0117743	2,1,3-Benzothiadiazole-4-carbaldehyde	Benzene and substituted derivatives	Benzene and substituted derivatives	C7H4N2OS	202.967	164.004	0.6965	[M+K]+	1.08375	4	0.9736	rp	5170-68-3	2776283	-	-	-	B	93610.3	86628.9	89836.4	95224	87345	88019.2	82438.6	82416.2	83133.5	-
T3_positive	MEDP2105	3,6,9,12,15,18,21-Heptaoxatricosane-21,23-diol	Benzene and substituted derivatives	Benzene and substituted derivatives	C16H34O9	388.249	370.22	3.1524	[M+NH4]+	13.1948	1	0.7963	rp	5117-19-1	78798	-	-	-	B	2166.58	7899.07	2085.64	1820.48	10896.9	2576.04	16125	16617	16720	-
T3_positive	MW0009923	Tiapride	Benzene and substituted derivatives	Benzene and substituted derivatives	C15H24N2O4S	329.16	328.146	2.9185	[M+H]+	18.8339	2	0.703	rp	51012-32-9	5467	HMDB0042039	-	-	B	6050.76	6790.67	5114.35	5494.64	2964.24	2482.92	5992.55	6129.49	6016.55	-
T3_positive	MW0009376	Phenelzine	Benzene and substituted derivatives	Benzene and substituted derivatives	C8H12N2	136.105	136.1	2.5531	[M+]+	10.5215	2	0.7742	rp	51-71-8	3675	HMDB0014918	-	C07430	B	2418.98	3845.58	2414.22	971.682	3263.81	3680.81	2833.1	3030.29	2994.96	-
T3_positive	MW0009082	Niclosamide	Benzene and substituted derivatives	Benzene and substituted derivatives	C13H8Cl2N2O4	348.986	325.986	6.5209	[M+Na]+	23.4338	1	0.7056	rp	50-65-7	4477	HMDB0015679	-	-	B	39859.1	36672.5	43213.7	28996.5	31974.4	34713	29304.8	29757.6	29781.7	-
T3_positive	MW0009555	Proparacaine	Benzene and substituted derivatives	Benzene and substituted derivatives	C16H26N2O3	295.208	294.194	4.15	[M+H]+	10.7178	2	0.7643	rp	499-67-2	4935	HMDB0014945	-	C07383	B	13965.3	12289.2	11509.5	5269.25	15887.2	5342.34	9069.83	9102.67	9072.6	-
T3_positive	MW0002155	2,3-Dihydrobenzofuran	Benzene and substituted derivatives	Benzene and substituted derivatives	C8H8O	103.053	120.058	2.1047	[M+H-H2O]+	2.73648	1	0.8108	rp	496-16-2	10329	HMDB0013815	-	-	A	41715.9	42209.1	44275.8	34482.1	47335.5	48156.6	45614.5	45648.1	45725	-
T3_positive	MW0009507	Prenoxdiazine	Benzene and substituted derivatives	Benzene and substituted derivatives	C23H27N3O	362.221	361.215	7.3111	[M+H]+	3.34755	2	0.7439	rp	47543-65-7	120508	-	-	-	B	48478	45591	42035.5	34188.1	32154.2	27054.8	25939.6	25403.9	25282	-
T3_positive	MW0004716	4-Bromo-2-fluoro-6-methoxybenzonitrile	Benzene and substituted derivatives	Benzene and substituted derivatives	C8H5BrFNO	251.935	228.954	0.0834	[M+Na]+	0.36725	4	0.7409	rp	457051-15-9	57442209	-	-	-	B	2716.3	3099.51	5497.89	2013.72	2306.48	2389.88	1573.87	1502.94	1367.48	-
T3_positive	MW0008153	N-(3-bromophenyl)cyclohexanecarboxamide	Benzene and substituted derivatives	Benzene and substituted derivatives	C13H16BrNO	282.048	281.041	6.9052	[M+H]+	1.18675	4	0.7212	rp	452365-99-0	849114	-	-	-	B	2280.15	1384.92	2136.37	1751.53	1603.1	1571.01	6599.03	6651.29	6764.2	-
T3_positive	MW0010102	2-Cyclohexyl-2-hydroxy-2-phenylacetic acid	Benzene and substituted derivatives	Benzene and substituted derivatives	C14H18O3	199.109	234.126	6.7485	[M+H-2H2O]+	6.56115	1	0.7451	rp	4335-77-7 | 50896-04-3	97700	-	1688	-	B	11293.9	11256.7	12397.7	9310.06	11725.5	11314.1	9241.77	9441.17	9358.75	-
T3_positive	MW0169975	Tulobuterol	Benzene and substituted derivatives	Benzene and substituted derivatives	C12H18ClNO	192.094	227.108	2.5441	[M+H-2H2O]+	0.13707	2	0.7565	rp	41570-61-0	5606	-	44379	-	B	320428	278077	307144	144144	264651	296789	289544	289355	289740	-
T3_positive	MW0009391	2-{4-[(3,5-Dichlorophenyl)amino]-6-methylpyrimidin-2-yl}phenol	Benzene and substituted derivatives	Benzene and substituted derivatives	C17H13Cl2N3O	384.007	345.044	2.1047	[M+K]+	1.41875	4	0.7158	rp	381683-04-1	921982	-	-	-	B	1538.33	1462.04	2013.06	1333.06	1219.55	1522.54	1480.12	1539.19	1527.91	-
T3_positive	MW0004432	2,2-Bis(4-(3,4-dicarboxyphenoxy)phenyl)propane dianhydride	Benzene and substituted derivatives	Benzene and substituted derivatives	C31H20O8	521.13	520.116	8.4449	[M+H]+	0.350499	4	0.9913	rp	38103-06-9	94483	-	-	-	B	1730.63	1819.28	1323.81	537.063	397.004	266.158	3114.57	3093.3	3017.61	-
T3_positive	MW0001998	2-Benzamido-5-phenylthiophene-3-carboxylic acid	Benzene and substituted derivatives	Benzene and substituted derivatives	C18H13NO3S	324.079	323.062	2.1134	[M+H]+	0.965	4	0.7264	rp	380646-20-8	709215	-	-	-	B	805.805	1690.15	1138.49	943.921	1553.39	1206.37	1221.45	1167.18	1133.06	-
T3_positive	MW0000724	Shogaol	Benzene and substituted derivatives	Phenolics	C17H24O3	277.176	276.173	6.4004	[M+H]+	6.43337	1	0.793	rp	36700-45-5	5281794	HMDB0031463	-	C10494	B	35118.9	27597.4	33225.9	28136.9	28514.7	37007.1	31601	31590.5	31306.5	-
T3_positive	MW0169331	Isoproturon	Benzene and substituted derivatives	Benzene and substituted derivatives	C12H18N2O	229.138	206.142	4.5943	[M+Na]+	18.177	2	0.7274	rp	34123-59-6	36679	HMDB0253682	-	C11005	B	4038.76	3760.29	3839.31	3262.87	3349.29	16364.6	5186.61	5172.59	5169.28	-
T3_positive	MEDP1003	1-Hydroxylamino-2-phenylethane	Benzene and substituted derivatives	Benzene and substituted derivatives	C8H11NO	120.08	137.084	2.1047	[M+H-H2O]+	2.4034	1	0.9443	rp	3217-93-4	165091	HMDB0001065	-	-	A	731887	726918	813569	608190	839456	830822	792265	792618	793524	-
T3_positive	MW0003687	3,5-dichloro-N-(2-methyl-3-oxobutan-2-yl)benzamide	Benzene and substituted derivatives	Benzene and substituted derivatives	C12H13Cl2NO2	274.046	273.032	1.431	[M+H]+	1.6645	4	0.7101	rp	29918-41-0	3015486	-	-	-	B	8976.82	10144.5	11511.7	11372.6	7309.29	11853.2	10129.4	10269.7	9776.76	-
T3_positive	MW0169828	Secoisolariciresinol	Benzene and substituted derivatives	Benzene and substituted derivatives	C20H26O6	363.179	362.173	3.8472	[M+H]+	8.55908	2	0.7437	rp	29388-59-8	65373	HMDB0013692	-	C18167	B	878.618	2083.45	1436.76	1162.92	1557.61	2415.72	2288.28	2228.24	2194.34	ko01100
T3_positive	MW0001765	2-(2,4-Dinitrophenoxy)ethanol	Benzene and substituted derivatives	Benzene and substituted derivatives	C8H8N2O6	266.998	228.038	4.2856	[M+K]+	0.59025	4	0.7355	rp	2831-60-9	76070	-	-	-	B	16295.2	17275	42038.4	11093.6	65799.7	11472.3	13971.3	13580.1	13529.8	-
T3_positive	MEDN1404	4-Methylhippuric acid	Benzene and substituted derivatives	Benzene and substituted derivatives	C10H11NO3	176.069	193.074	5.0641	[M+H-H2O]+	4.58349	1	0.7279	rp	27115-50-0	97479	HMDB0013292	-	-	A	50945.7	72230.3	80606.4	63346.8	97110	81904.1	78780.9	78711.3	78780.3	-
T3_positive	MW0009406	Phenthoate	Benzene and substituted derivatives	Benzene and substituted derivatives	C12H17O4PS2	285.012	320.031	1.5619	[M+H-2H2O]+	9.52296	2	0.707	rp	2597-03-7 | 61391-87-5 | 61361-99-7 | 61362-00-3	17435	-	70055	-	B	16464.4	16654.1	17045.8	13948.2	14610.3	14123.9	15445	15434.8	15218.4	-
T3_positive	MW0004126	3-Methyl-4-phenylbutan-2-one	Benzene and substituted derivatives	Benzene and substituted derivatives	C11H14O	180.133	162.105	6.1823	[M+NH4]+	10.719	2	0.7716	rp	2550-27-8	102847	HMDB0133676	-	-	B	16551.8	15051.5	15078	13927.2	13625.5	14874.6	15394.6	15512.7	15307.1	-
T3_positive	MW0168863	Bufexamac	Benzene and substituted derivatives	Benzene and substituted derivatives	C12H17NO3	224.126	223.121	1.3185	[M+H]+	5.89254	1	0.7272	rp	2438-72-4	2466	-	44293	C74254	B	39616	53086	55175.8	48612.3	40800.5	33542.7	60854.5	60281.2	58326.8	-
T3_positive	MW0146585	2,3-Benzofluorene	Benzene and substituted derivatives	Benzene and substituted derivatives	C17H12	217.102	216.094	2.3501	[M+H]+	2.99747	3	0.9375	rp	243-17-4 | 30777-19-6	9201	-	-	-	B	1078.62	6741.88	5009.2	4130.3	7509.11	4971.33	20509.1	20589.5	20917.8	-
T3_positive	MW0009939	Tolnaftate	Benzene and substituted derivatives	Benzene and substituted derivatives	C19H17NOS	272.091	307.103	6.2722	[M+H-2H2O]+	1.7817	1	0.7299	rp	2398-96-1	5510	HMDB0005005	-	-	B	3051.42	4934.86	3037.7	2737.49	3932.07	761.918	3487.07	3698.12	3676.58	-
T3_positive	MW0157522	3-Methylbenzenecarbothioamide	Benzene and substituted derivatives	Benzene and substituted derivatives	C8H9NS	152.055	151.046	0.8615	[M+H]+	5.97499	2	0.8987	rp	2362-63-2	736826	-	96500	-	B	47496.7	38691.5	45726.1	35314.8	37778.6	43354.6	42494.7	43202.9	43245.6	-
T3_positive	MW0000925	Bis(2-methylpropanoyloxy)-9,10-epoxy-p-mentha-1,3,5-triene	Benzene and substituted derivatives	Phenolics	C18H24O5	343.15	320.162	7.2231	[M+Na]+	2.05296	2	0.7491	rp	22518-06-5	11472669	HMDB0032698	-	-	B	140688	135757	142669	81706.6	96286.3	65834	57504.7	56357	55162.2	-
T3_positive	MW0009922	Tiadinil	Benzene and substituted derivatives	Benzene and substituted derivatives	C11H10ClN3OS	285.061	267.023	0.5864	[M+NH4]+	0.776	4	0.731	rp	223580-51-6	2804318	-	-	C18550	B	9890.11	9272.41	13086.5	7914.97	8826.05	12151.3	9493.54	9455.25	9452.68	-
T3_positive	MW0009356	Pentadecylbenzene	Benzene and substituted derivatives	Benzene and substituted derivatives	C21H36	327.249	288.282	6.8877	[M+K]+	0.74675	4	0.7317	rp	2131-18-2	16476	HMDB0040180	-	-	B	3734.93	1060.37	2769.09	1665.7	2225.16	1644.37	2179.39	2440.02	2440.84	-
T3_positive	MW0005059	4-Hydroxy-3-methoxycinnamaldehyde	Benzene and substituted derivatives	Phenolics	C10H10O3	242.071	178.063	4.4378	[M+CH3CN+Na]+	18.975	3	0.7586	rp	20649-42-7	5280536	HMDB0141782	-	C02666	B	1062.53	1308.29	1400.17	1358.31	1578.84	1711.68	1752.03	1750.21	1779.53	ko01100
T3_positive	MW0006201	6-(2-Prop-2-ynoxyphenyl)hexanoic acid	Benzene and substituted derivatives	Phenolics	C15H18O3	269.114	246.126	4.7694	[M+Na]+	1.58406	2	0.7655	rp	206052-01-9	53741002	-	63087	-	B	30175.2	28926.5	28494.5	26361.2	26239	28153.2	27943.3	27997	27992.9	-
T3_positive	MW0009293	Oxadiazon	Benzene and substituted derivatives	Benzene and substituted derivatives	C15H18Cl2N2O3	345.082	344.069	5.2715	[M+H]+	14.5195	2	0.7356	rp	19666-30-9	29732	-	72302	C18496	B	1155.27	20228.9	17257	13626.8	49817.7	2510.97	10773.7	10774	10748	-
T3_positive	MW0006406	Boscalid	Benzene and substituted derivatives	Benzene and substituted derivatives	C18H12Cl2N2O	365.022	342.033	1.4855	[M+Na]+	0.82875	4	0.7297	rp	188425-85-6	213013	-	72352	C18547	B	2450.26	1882.11	2352.28	1340.12	662.991	1618.14	1863.72	1963.06	1944.25	-
T3_positive	MW0147396	Clofenvinfos	Benzene and substituted derivatives	Benzene and substituted derivatives	C12H14Cl3O4P	358.975	357.969	7.101	[M+H]+	3.035	2	0.7939	rp	18708-87-7 | 470-90-6 | 135373-33-0	5377784	-	-	-	B	13335.4	13829.5	13316.6	10114.9	9405.73	8471.46	8258.65	8272.92	8096.93	-
T3_positive	MW0136716	6-Hydroxywarfarin	Benzene and substituted derivatives	Benzene and substituted derivatives	C19H16O5	325.101	324.1	6.3814	[M+H]+	13.8719	2	0.74	rp	17834-02-5	54682459	HMDB0140987	-	-	B	7719.65	8159.01	8108.07	7772.99	6154.29	7717.4	6468.11	6631.13	6436.88	-
T3_positive	MW0148408	Diamidafos	Benzene and substituted derivatives	Benzene and substituted derivatives	C8H13N2O2P	201.085	200.071	6.3609	[M+H]+	1.16175	4	0.7218	rp	1754-58-1	15643	-	-	C19035	B	1484.12	668.132	1543.49	1229.99	1208.9	1405.78	1836.34	2002.33	1972.03	-
T3_positive	MEDP2280	CCT-018159	Benzene and substituted derivatives	Benzene and substituted derivatives	C20H20N2O4	353.153	352.142	6.3609	[M+H]+	14.4509	2	0.8823	rp	171009-07-7	984170	-	45356	-	B	89328.7	81082.1	80876.7	70797.5	69184.4	73272.2	76138.5	75979.7	75573.6	-
T3_positive	MW0006940	Drofenine	Benzene and substituted derivatives	Benzene and substituted derivatives	C20H31NO2	318.236	317.236	6.7485	[M+H]+	15.1016	2	0.8187	rp	1679-76-1	3166	-	44157	-	B	2931.49	3248.65	2556.25	716.337	2574.47	607.655	2770.16	2944.02	2976.57	-
T3_positive	MW0125977	Olsalazine	Benzene and substituted derivatives	Benzene and substituted derivatives	C14H10N2O6	325.043	302.054	2.562	[M+Na]+	0.28475	4	0.7429	rp	15722-48-2	22419	HMDB0015380	-	C07323	B	2456.38	2434.25	2309.26	2081.24	2723.34	2509.15	2613.71	2597.69	2612.4	-
T3_positive	MW0009999	Tropicamide	Benzene and substituted derivatives	Benzene and substituted derivatives	C17H20N2O2	285.164	284.152	4.7694	[M+H]+	9.82053	1	0.8135	rp	1508-75-4	5593	HMDB0014947	-	-	B	5692.02	4586.65	4552.84	1408.32	2950.46	4134.41	3218.43	3711.19	3911.33	-
T3_positive	MW0006431	Butacaine	Benzene and substituted derivatives	Benzene and substituted derivatives	C18H30N2O2	307.243	306.231	6.6787	[M+H]+	13.3304	2	0.7043	rp	149-16-6	2480	-	44369	-	B	11005.1	10411.6	10453.8	4607.74	8641.86	6309.19	8772.96	8708.61	8405.91	-
T3_positive	MW0156331	7-Methyljuglone	Benzene and substituted derivatives	Benzene and substituted derivatives	C11H8O3	189.058	188.047	0.5864	[M+H]+	11.8593	3	0.7179	rp	14787-38-3	26905	-	-	-	B	7155.78	6389.01	7434.29	6578.46	6236.6	7741.43	7484.26	7441.12	7457.04	-
T3_positive	MW0110915	Arachidonoyl Thio-PC	Benzene and substituted derivatives	Benzene and substituted derivatives	C44H82NO6PS	784.574	783.56	5.4259	[M+H]+	5.50066	2	0.9177	rp	146797-82-2	53394300	-	63010	-	B	6434.83	5064.46	5243.78	2986.01	6829.08	5523.36	5049.35	4888.35	4265.97	-
T3_positive	MW0004794	4-Chloro-5-fluorobenzene-1,2-diamine	Benzene and substituted derivatives	Benzene and substituted derivatives	C6H6ClFN2	198.982	160.02	0.0424	[M+K]+	0.8855	4	0.7283	rp	139512-70-2	735773	-	-	-	B	18553.1	3490.21	2662.71	3089.93	2471.14	4845.09	3981.45	4095.78	3288.9	-
T3_positive	MW0006009	Alprenolol	Benzene and substituted derivatives	Phenolics	C15H23NO2	250.175	249.173	6.0526	[M+H]+	14.2741	2	0.7096	rp	13655-52-2	2119	HMDB0015004	-	-	B	43008.1	35649.7	36526.5	37494.2	30656.3	34132.3	37257.6	37265.1	37145.6	-
T3_positive	MW0001375	1,4-Naphthoquinone	Benzene and substituted derivatives	Benzene and substituted derivatives	C10H6O2	181.026	158.037	0.0477	[M+Na]+	1.94875	4	0.7036	rp	130-15-4	8530	-	-	C02617	B	3211	2844	2924.98	2627.22	6587.02	2058.83	2606.17	2492.64	2624	ko00980
T3_positive	MW0052943	Fulvestrant	Benzene and substituted derivatives	Benzene and substituted derivatives	C32H47F5O3S	629.307	606.317	3.7019	[M+Na]+	3.79436	1	0.8979	rp	129453-61-8	104741	-	45325	-	B	1116.31	1098.16	863.691	695.335	1283.03	709.55	1463.46	1448.71	1448.15	-
T3_positive	MW0006046	Ancymidol	Benzene and substituted derivatives	Phenolics	C15H16N2O2	257.132	256.121	4.478	[M+H]+	10.356	2	0.7637	rp	12771-68-5	25572	-	-	C18774	B	853.27	535.962	772.067	287.413	278.578	1151.7	2068.63	2073.51	2071.84	-
T3_positive	MW0169613	Oxethazaine	Benzene and substituted derivatives	Benzene and substituted derivatives	C28H41N3O3	467.317	467.315	3.3508	[M+]+	5.35611	1	0.7349	rp	126-27-2	4621	-	44658	-	B	3065.94	3034.63	3225.99	1894.18	2644.86	2909.42	2226.47	2465.8	2493.11	-
T3_positive	MW0009942	Tolterodine	Benzene and substituted derivatives	Benzene and substituted derivatives	C22H31NO	326.262	325.241	5.2829	[M+H]+	8.43239	2	0.8238	rp	124937-51-5	443879	HMDB0015170	-	C07750	B	9266.99	4393.88	8655.46	540.832	1988.52	798.404	5595.61	5472.98	5559.28	-
T3_positive	MW0114116	Coniferin	Benzene and substituted derivatives	Benzene and substituted derivatives	C16H22O8	365.129	342.132	2.9185	[M+Na]+	13.7128	2	0.757	rp	124151-33-3	5280372	HMDB0013682	-	C00761	B	2620.07	2834.92	3399.85	2685.41	1299.68	1736.26	2351.34	2397.02	2400.05	-
T3_positive	MW0003577	3,4,5-Trifluorobenzoic acid	Benzene and substituted derivatives	Benzene and substituted derivatives	C7H3F3O2	177.022	176.008	0.7679	[M+H]+	1.215	4	0.7205	rp	121602-93-5 | 255875-61-7	853154	-	-	-	B	2151.17	1791.45	1985.38	1292.36	1758.56	1649.21	1926.27	1899.41	1900.73	-
T3_positive	MW0009575	2-(1-chlorocyclopropyl)-1-(2-chlorophenyl)-3-(1H-1,2,4-triazol-1-yl)propan-2-ol	Benzene and substituted derivatives	Benzene and substituted derivatives	C14H15Cl2N3O	334.05	311.059	1.4855	[M+Na]+	0.544	4	0.7366	rp	120983-64-4	119361	-	-	-	B	3177.49	3531.81	3622.97	2991.2	2837.86	3491.91	3261.43	3343.11	3269.2	-
T3_positive	MEDP0688	Benzophenone	Benzene and substituted derivatives	Benzene and substituted derivatives	C13H10O	183.078	182.073	6.7117	[M+H]+	6.71706	1	0.8125	rp	119-61-9	3102	HMDB0032049	-	C06354	A	1757.9	1664.42	1824.8	1663.91	1884.29	1996.76	1888.72	1820.36	1875.92	-
T3_positive	MW0005393	5-(3-Carboxybenzoyl)-2-((6-(4-methoxyphenyl)-5-hexenyl)oxy)benzenepropanoic acid	Benzene and substituted derivatives	Benzene and substituted derivatives	C30H30O7	467.183	502.199	3.349	[M+H-2H2O]+	1.63457	2	0.8365	rp	117423-74-2	6444688	-	45208	-	B	227.301	631.505	496.215	337.287	994.91	348.98	1620.11	1659.27	1665.79	-
T3_positive	MW0005674	5-Hydroxynaphthalene-1-sulfonic acid	Benzene and substituted derivatives	Benzene and substituted derivatives	C10H8O4S	262.978	224.014	0.6566	[M+K]+	3.32375	4	0.9234	rp	117-59-9	67025	-	-	-	B	63821.5	59128.6	59164.5	46199.5	58697.2	55875.1	57595.3	57482.9	57610.7	-
T3_positive	MW0009168	Novaluron	Benzene and substituted derivatives	Phenolics	C17H9ClF8N2O4	515.002	492.012	0.6965	[M+Na]+	0.630676	4	0.9845	rp	116714-46-6	93541	-	-	C18875	B	4.09668e+06	3.89101e+06	4.06514e+06	3.68792e+06	3.56195e+06	3.56952e+06	3.70213e+06	3.72262e+06	3.72221e+06	-
T3_positive	MW0125556	N-[2-(Methylamino)ethyl]-5-isoquinolinesulfonamide dihydrochloride	Benzene and substituted derivatives	Benzene and substituted derivatives	C12H17Cl2N3O2S	283.123	337.042	1.4126	[M+NH4]+	0.60821	2	0.7585	rp	113276-94-1	150584	-	45237	-	B	565231	464299	512729	449824	392117	480130	456731	444217	442621	-
T3_positive	MW0007494	Letrozole	Benzene and substituted derivatives	Benzene and substituted derivatives	C17H11N5	324.064	285.101	2.5441	[M+K]+	1.3865	4	0.7165	rp	112809-51-5	3902	HMDB0015141	-	C08163	B	4173.84	3599.66	3562.07	2553.54	3327.97	3724.15	2576.72	2761.11	2621.48	-
T3_positive	MW0007656	Methyl 2-(10-heptadecenyl)-6-hydroxybenzoate	Benzene and substituted derivatives	Benzene and substituted derivatives	C25H40O3	389.308	388.298	6.4875	[M+H]+	11.483	3	0.7492	rp	111047-31-5	131752389	HMDB0038523	-	-	B	21219.8	21753.5	20136.8	17645.3	17703.7	17337.7	17735.2	17744.5	17517	-
T3_positive	MW0149253	Flusulfamide	Benzene and substituted derivatives	Benzene and substituted derivatives	C13H7Cl2F3N2O4S	414.948	413.946	4.5168	[M+H]+	1.3712	4	0.7169	rp	106917-52-6	86268	-	-	C18521	B	3099.81	4002.76	9635.47	3028.51	2561.77	400.253	4582.25	4367.58	4452.09	-
T3_positive	MW0009739	Sibutramine	Benzene and substituted derivatives	Benzene and substituted derivatives	C17H26ClN	280.185	279.175	6.3609	[M+H]+	8.01175	2	0.7043	rp	106650-56-0	5210	HMDB0015237	-	C07247	B	6522.67	6631.43	6055.45	4958.99	4721.96	6013.77	4748.6	4722.41	4747.66	-
T3_positive	MW0005487	Tamsulosin	Benzene and substituted derivatives	Benzene and substituted derivatives	C20H28N2O5S	409.178	408.172	3.1524	[M+H]+	3.9334	1	0.8578	rp	106133-20-4	129211	HMDB0014844	-	C07124	B	1110.09	3809.32	1219.14	1175.17	5058.82	1237.07	7562.77	7759.41	7803.17	-
T3_positive	MW0003631	Hydroxytyrosol	Benzene and substituted derivatives	Benzene and substituted derivatives	C8H10O3	331.119	154.063	2.4029	[2M+Na]+	10.3	3	0.7085	rp	10597-60-1	82755	HMDB0005784	-	-	B	2998.1	2212.93	2600.17	2291.29	2465.67	1435.47	2294.96	2287.94	2280.7	-
T3_positive	MW0009121	N-Methylbenzylamine	Benzene and substituted derivatives	Benzene and substituted derivatives	C8H11N	122.094	121.089	0.8676	[M+H]+	4.81859	2	0.8033	rp	103-67-3	7669	HMDB0012275	-	-	A	27405.5	26849.7	27130.5	24369	22838.6	24790.3	23861.2	23618.6	23598.1	-
T3_positive	MW0138954	Methyl cinnamate	Benzene and substituted derivatives	Benzene and substituted derivatives	C10H10O2	163.073	162.068	7.2231	[M+H]+	3.73989	1	0.8845	rp	103-26-4 | 1754-62-7	637520	HMDB0033833	66385	C06358	B	136013	134368	141953	75697.9	94198.7	62555.5	56208.4	55172.1	53803.7	-
T3_positive	MW0143423	4-Nitrosobiphenyl	Benzene and substituted derivatives	Benzene and substituted derivatives	C12H9NO	184.071	183.068	6.3407	[M+H]+	11.3744	3	0.7684	rp	10125-76-5	24971	-	-	C20316	B	25320.1	15694.8	15530.5	15654.7	14510.8	18694.1	16648.3	16785.3	16693.7	ko05208
T3_positive	MW0004299	4,4'-Oxydianiline	Benzene and substituted derivatives	Benzene and substituted derivatives	C12H12N2O	201.107	200.095	2.8285	[M+H]+	14.6352	2	0.7001	rp	101-80-4 | 121509-79-3 | 287476-22-6	7579	-	-	-	B	5139.38	6706	5291.66	3528.32	4253.82	3746.82	8105.03	8071.15	7656	-
T3_positive	MW0006078	Benzyl alcohol	Benzene and substituted derivatives	Benzene and substituted derivatives	C7H8O	91.0527	108.058	1.4489	[M+H-H2O]+	3.775	3	0.8087	rp	100-51-6	244	HMDB0003119	-	C03485	B	3619.06	5172.1	4519.72	3520.38	4444.77	2072.24	2939.04	3125.75	3009.2	-
T3_positive	MW0006323	Benzylamine	Benzene and substituted derivatives	Benzene and substituted derivatives	C7H9N	107.07	107.073	1.3912	[M+]+	8.48859	2	0.8833	rp	100-46-9	7504	HMDB0033871	-	C15562	B	6274.48	5619.02	6163.6	4695.19	5077.15	5971.4	6444.53	6449.65	6350.03	-
T3_positive	MW0117717	2-(Methylthio)benzothiazole	Benzene and substituted derivatives	Benzene and substituted derivatives	C8H7NS2	182.007	181.002	6.6465	[M+H]+	7.50839	1	0.9518	rp	-	11989	HMDB0303335	-	C10910	B	13295.4	13244.7	13198.3	11045	10747.1	12509.8	10654.4	10774.2	10649.2	-
T3_positive	MW0006770	Diaveridine	Benzene and substituted derivatives	Benzene and substituted derivatives	C13H16N4O2	261.127	260.127	2.6218	[M+H]+	17.3786	1	0.8578	rp	-	21453	HMDB0251144	-	-	B	560.086	591.809	328.075	709.781	379.981	305.674	4191.58	4214.79	3686.81	-
T3_positive	MW0168855	Bisphenol A	Benzene and substituted derivatives	Benzene and substituted derivatives	C15H16O2	246.149	228.115	5.614	[M+NH4]+	0.129927	1	0.7629	rp	-	6623	HMDB0032133	-	C13624	B	1284.96	904.831	2509.47	1450.26	2643.36	2719.46	3078.98	3063.62	3080.72	ko01100,ko05207
T3_positive	MEDP2158	N4-(4-phenoxyphenethyl)quinazoline-4,6-diamine	Benzene and substituted derivatives	Benzene and substituted derivatives	C22H20N4O	339.152	356.164	5.4192	[M+H-H2O]+	15.4224	1	0.7132	rp	-	509554	HMDB0246942	-	-	B	2886.68	3957.68	3929.47	3761.23	3782.2	3830.67	3264.35	3105.26	3056.45	-
T3_positive	MW0008096	N-(2-phenylphenyl)-8-[4-(3-pyridinyl)-1-triazolyl]octanamide	Benzene and substituted derivatives	Benzene and substituted derivatives	C27H29N5O	422.23	439.237	7.2582	[M+H-H2O]+	4.73215	2	0.8815	rp	-	44819697	-	96512	-	B	3155.15	3149.89	3989	1617.77	1663.66	1349.84	1715.87	1751.38	1555.12	-
T3_positive	MW0000458	Tetrahydroharman-3-carboxylic acid	Benzene and substituted derivatives	Benzene and substituted derivatives	C13H14N2O2	231.117	230.106	2.7393	[M+H]+	12.9328	2	0.8462	rp	-	4264556	HMDB0037942	-	-	B	4527.09	9598.23	5965.24	4296.43	9555.48	6752.15	6822.61	7068.99	7187.83	-
T3_positive	MW0009445	4-Tetradecanamidobenzylphosphonic acid	Benzene and substituted derivatives	Benzene and substituted derivatives	C21H36NO4P	398.248	397.238	6.7485	[M+H]+	12.1844	2	0.8078	rp	-	44176227	HMDB0246585	-	-	B	5729.48	5876.17	7155.77	5497.28	6751.92	6068.25	5367.13	5405.02	5454.11	-
T3_positive	MW0008816	N-Cyclobutylmethyl-14-hydroxydihydronormorphine	Benzene and substituted derivatives	Benzene and substituted derivatives	C21H27NO4	358.203	357.194	3.0388	[M+H]+	0.663448	2	0.7739	rp	-	58320671	HMDB0014982	-	-	B	594.35	716.136	209.705	392.736	1170.85	701.09	2601.64	2607.74	2671.11	-
T3_positive	MW0006061	Anthraquinone	Benzene and substituted derivatives	Benzene and substituted derivatives	C14H8O2	209.057	208.052	6.5127	[M+H]+	4.71651	2	0.7607	rp	-	6780	HMDB0248468	-	C16207	B	4393.22	4022.72	3927.47	2969.05	3620.49	3731.63	3730.03	3728.24	3672.52	-
T3_positive	MW0120565	4-Hydroxy Triamterene	Benzene and substituted derivatives	Benzene and substituted derivatives	C12H11N7O	270.102	269.103	3.9596	[M+H]+	20.7553	2	0.7562	rp	-	71046	HMDB0246440	-	-	B	3131.24	905.185	2692.6	2752.34	1051.55	3115.52	2505.66	2414.22	2520.75	-
T3_positive	MW0169946	Tribenzylamine N-oxide	Benzene and substituted derivatives	Benzene and substituted derivatives	C21H21NO	304.172	303.162	6.3823	[M+H]+	6.12963	2	0.7508	rp	-	3624962	-	24081	-	B	6163.3	5774.85	7055.9	5535.17	5667.15	5513.37	5726.7	5873.8	5813.78	-
T3_positive	MW0001465	1-[3,5-bis(trifluoromethyl)benzoyl]-N-(4-chlorophenyl)piperidine-3-carboxamide	Benzene and substituted derivatives	Benzene and substituted derivatives	C21H17ClF6N2O2	479.1	478.088	5.0641	[M+H]+	10.8098	2	0.7381	rp	-	46190808	-	96448	-	B	4466.65	6029.67	6516.07	2287.54	7277.58	6297.74	6490.97	6530.86	6490.03	-
T3_positive	MW0007002	Ethalfluralin	Benzene and substituted derivatives	Benzene and substituted derivatives	C13H14F3N3O4	298.079	333.094	7.3111	[M+H-2H2O]+	2.67136	2	0.7358	rp	-	41381	HMDB0251997	-	C18827	B	1090.87	1450.68	1083.97	854.163	907.735	296.73	4537.41	4555.3	4528.19	-
T3_positive	MW0003225	2-[(1-{3-[4-(Biphenyl-4-ylcarbonyl)-2-propylphenoxy]propyl}-1,2,3,4-tetrahydroquinolin-5-yl)oxy]-2-methylpropanoic acid	Benzene and substituted derivatives	Benzene and substituted derivatives	C38H41NO5	614.291	591.298	0.6566	[M+Na]+	8.42133	2	0.7341	rp	-	42626030	-	45516	-	B	23550.8	25936.5	22767.5	18800.6	25932.1	26361.3	24608.2	24671.4	24647.2	-
T3_positive	MW0007347	Hydroxyflutamide	Benzene and substituted derivatives	Benzene and substituted derivatives	C11H11F3N2O4	257.057	292.067	3.8185	[M+H-2H2O]+	8.32571	2	0.7243	rp	-	91649	HMDB0060949	-	C14204	B	3416.63	3279.54	3958.1	3486.31	3318.36	3508.65	4148.24	4247.97	4265.7	-
T3_positive	MW0003897	3'-Carbamoyl-[1,1'-biphenyl]-3-yl cyclohexylcarbamate	Benzene and substituted derivatives	Benzene and substituted derivatives	C20H22N2O3	339.174	338.163	6.018	[M+H]+	10.5835	2	0.7199	rp	-	1383884	HMDB0246943	-	-	B	8023.86	4720.83	4345.03	4273	4606.07	4950.9	6566.12	6471.26	6531.51	-
T3_positive	MW0003276	(2-Naphthyl)methanol	Benzene and substituted derivatives	Benzene and substituted derivatives	C11H10O	205.083	158.073	7.3463	[M+HCOO+2H]+	6.775	3	0.8397	rp	-	74128	HMDB0060303	-	C02909	B	20196.3	17323.3	16198.9	11805.7	12757.2	9948.78	9900.55	9968.36	9442.94	-
T3_positive	MW0138481	Hopeaphenol	Benzene and substituted derivatives	Benzene and substituted derivatives	C56H42O12	907.248	906.268	6.9604	[M+H]+	23.1314	3	0.7063	rp	-	495605	HMDB0033013	-	-	B	54090.4	49765.3	51002.4	29773.7	41387.7	34637.1	24994.3	25688.7	24902.6	-
T3_positive	ZINC85508508	5-Hydroxyaloin A 6'-O-acetate	Benzene and substituted derivatives	Benzene and substituted derivatives	C23H24O11	494.166	476.132	7.0921	[M+NH4]+	0.290256	4	0.9928	rp	-	11972368	-	-	-	B	46390.8	894.263	4187.41	32609.3	1997.82	2221.28	29945.2	29964	29370.2	-
T3_positive	MW0130163	3-[(2S,3R,4S,5R,6R)-4-[(2S,3R,4S,5S,6R)-4,5-dihydroxy-6-(hydroxymethyl)-3-[(2S,3R,4S,5R)-3,4,5-trihydroxyoxan-2-yl]oxyoxan-2-yl]oxy-3,5-dihydroxy-6-(hydroxymethyl)oxan-2-yl]oxy-2-(3,4-dihydroxyphenyl)-5,7-dihydroxychromen-4-one	Benzene and substituted derivatives	Benzene and substituted derivatives	C32H38O21	781.186	758.191	7.7992	[M+Na]+	0.582175	4	0.9857	rp	-	44715568	-	-	-	B	143268	140408	9074	38297.2	35580	38885.5	43444.7	43035.8	43560.6	-
T3_positive	MW0006136	Bensultap	Benzene and substituted derivatives	Benzene and substituted derivatives	C17H21NO4S4	469.999	431.035	1.4126	[M+K]+	1.52864	4	0.9632	rp	-	87176	HMDB0248963	-	C18563	B	9810.26	12067.7	13886	12556.1	15403.9	11933.7	12335.2	12146	12071.3	-
T3_positive	MW0001603	1-Hydroxy-2-naphthoic acid	Benzene and substituted derivatives	Benzene and substituted derivatives	C11H8O3	227.005	188.047	0.5864	[M+K]+	3.3605	4	0.9227	rp	-	6844	HMDB0243892	-	C03203	A	18648.1	17766.8	11564.7	17545.6	16692	21084.8	18947.7	18993.1	18871.2	ko01100
T3_positive	MW0149151	Fenuron tca	Benzene and substituted derivatives	Benzene and substituted derivatives	C11H13Cl3N2O3	327.004	325.999	6.5209	[M+H]+	5.43875	4	0.881	rp	-	20565	-	-	C19077	B	71295	65410.3	77114.6	54775	59815.2	60814.8	57810.8	58336	58355.4	-
T3_positive	ZINC49833526	2-[(9S)-4,5-dihydroxy-2-(hydroxymethyl)-10-oxo-9-[(2S,3R,4R,5S,6R)-3,4,5-trihydroxy-6-(hydroxymethyl)oxan-2-yl]anthracen-9-yl]-1,8-dihydroxy-6-(hydroxymethyl)anthracene-9,10-dione	Benzene and substituted derivatives	Benzene and substituted derivatives	C36H30O14	704.204	686.164	8.4104	[M+NH4]+	9.3914	4	0.8126	rp	-	122190710	-	-	-	B	99454.5	714990	387650	66223.4	395820	4031.53	117604	153664	139092	-
T3_positive	MW0105345	6-Benzyl-3-butan-2-yl-9-(7,8-dihydroxy-6-oxooctyl)-1,4,7,10-tetrazabicyclo[10.4.0]hexadecane-2,5,8,11-tetrone	Benzene and substituted derivatives	Benzene and substituted derivatives	C31H46N4O7	604.376	586.337	7.3463	[M+NH4]+	10.8298	4	0.7909	rp	-	45359468	-	-	-	B	60373.4	66272.7	53531.1	36477.1	37298.5	24756.9	15373.7	15774.3	13914.8	-
T3_positive	MW0162055	2-hydroxy-4-[[4-hydroxy-3-oxo-6-[(3R,4S,5S,6R)-3,4,5-trihydroxy-6-(hydroxymethyl)oxan-2-yl]oxy-1-benzofuran-2-ylidene]methyl]phenolate	Benzene and substituted derivatives	Benzene and substituted derivatives	C21H19O11-	465.124	447.093	7.751	[M+NH4]+	11.7724	4	0.7775	rp	-	25200347	-	-	-	B	956.595	1119.53	864.712	1156.75	1200.64	2929	8799.72	8797.42	8713.16	-
T3_positive	MW0116214	[6,10a-Dihydroxy-4-(hydroxymethyl)-4,7,11b-trimethyl-9-oxo-1,2,3,4a,5,6,6a,7,11,11a-decahydronaphtho[2,1-][1]benzouran-5-yl] acetate	Benzene and substituted derivatives	Benzene and substituted derivatives	C22H32O7	431.201	408.215	6.6045	[M+Na]+	0.481364	4	0.7381	rp	-	45360322	-	-	-	B	7133.27	6928.09	7575.6	5133.36	6639.58	4901.36	5563.49	5534.99	5562.4	-
T3_positive	MW0009659	(S)-Remoxipride	Benzene and substituted derivatives	Benzene and substituted derivatives	C16H23BrN2O3	409.051	370.089	0.7498	[M+K]+	0.5095	4	0.7374	rp	-	54940	HMDB0014553	-	-	B	27048	25867.5	23691.7	21392	22211.2	18072.1	21822.2	21690.5	21803.5	-
T3_positive	MW0161209	2-amino-3-hydroxybenzoate	Benzene and substituted derivatives	Benzene and substituted derivatives	C7H6NO3-	191.003	152.035	1.0988	[M+K]+	0.57975	4	0.7357	rp	-	9543318	-	-	-	B	1935.51	2295.64	2282.93	1510.73	1994.59	1801.75	2288.61	2281.65	2215.6	-
T3_positive	MW0008736	N-[5-(4-Nitrophenyl)-1,3,4-thiadiazol-2-yl]acetamide	Benzene and substituted derivatives	Benzene and substituted derivatives	C10H8N4O3S	265.047	264.032	0.0489	[M+H]+	0.72275	4	0.7323	rp	-	537952	-	-	-	B	692.642	1404.69	3758.42	688.585	475.737	957.386	1097.2	1041.31	1096.72	-
T3_positive	MW0166129	Farnesyl-5,7-dihydroxy-4,6-dimethylphthalide	Benzene and substituted derivatives	Benzene and substituted derivatives	C25H34O4	416.28	398.246	3.7525	[M+NH4]+	0.72575	4	0.7322	rp	-	91819848	-	-	-	B	2831.62	2374.2	2792.38	2129.85	2288.74	2514.05	2736.4	2752.28	2749.36	-
T3_positive	MW0116771	Mcoppb	Benzene and substituted derivatives	Benzene and substituted derivatives	C26H40N4	409.337	408.325	6.6758	[M+H]+	0.728341	4	0.7321	rp	-	24800108	-	-	-	B	1676.85	1466.02	1616.87	2127.07	3033.91	3596.45	2337.02	2438.25	2217.95	-
T3_positive	MW0132768	[2-methoxy-4-(3,5,6-trihydroxy-7-sulinooxy-3,4-dihydro-2H-chromen-2-yl)phenyl] hydrogen sulate	Benzene and substituted derivatives	Benzene and substituted derivatives	C16H16O12S2	486.989	464.008	0.6386	[M+Na]+	15.7704	4	0.7273	rp	-	131834177	HMDB0127823	-	-	B	40919.3	4029.36	41715	21825.2	39998.1	36995.7	24913.3	16618.1	24962.5	-
T3_positive	MW0164706	(3E)-4-(2-hydroxyphenyl)-2-oxobut-3-enoate	Benzene and substituted derivatives	Benzene and substituted derivatives	C10H7O4-	214.024	191.034	1.4363	[M+Na]+	1.0845	4	0.7236	rp	-	54675857	-	-	-	B	1207.22	2373.32	2268.86	2734.55	1219.26	1390.61	2134.5	2048.1	1997.38	-
T3_positive	MW0004276	4-(3-Chloro-2-fluorophenyl)-2-methylbut-3-YN-2-OL	Benzene and substituted derivatives	Benzene and substituted derivatives	C11H10ClFO	235.037	212.04	1.4126	[M+Na]+	1.44775	4	0.7151	rp	-	46739813	-	-	-	B	30277.3	37176.8	33885.4	32174.6	22772.4	28692	30851.8	30482.4	30262.3	-
T3_positive	MW0007174	Flufenoxuron	Benzene and substituted derivatives	Benzene and substituted derivatives	C21H11ClF6N2O3	511.025	488.036	0.5864	[M+Na]+	1.55869	4	0.7125	rp	-	91766	HMDB0252332	-	C18430	B	2524.62	921.751	2588.43	1669.34	553.192	2904.21	2218.21	2181	2236.36	-
T3_positive	MW0001337	NCGC00380712-01_C19H18O6_1,3-Cyclobutanedicarboxylic acid, 2,4-bis(4-hydroxyphenyl)-, monomethyl ester	Benzene and substituted derivatives	Phenolics	C19H18O6	381.074	342.11	0.7921	[M+K]+	1.654	4	0.7103	rp	-	56776249	-	-	-	B	4339.98	3807.45	5013.65	4143.93	4965.64	4965.89	4904.67	4874.59	4792.78	-
T3_positive	MW0005974	Adrafinil	Benzene and substituted derivatives	Benzene and substituted derivatives	C15H15NO3S	290.088	289.077	1.4855	[M+H]+	1.83975	4	0.7061	rp	-	3033226	HMDB0248029	-	-	B	3545.91	3298.39	2971.32	3190.53	2793.69	3211.61	4682.2	4970.56	4604.11	-
T3_positive	MW0009159	Noracymethadol	Benzene and substituted derivatives	Benzene and substituted derivatives	C22H29NO2	362.208	339.22	4.789	[M+Na]+	2.07325	4	0.7008	rp	-	15129	HMDB0061036	-	-	B	3583.08	3326.33	3582.2	3101.69	3121.69	3341.54	3216.94	3214.27	3167.25	-
T3_positive	MW0159468	Z-Phe-phe-chn2	Benzene and substituted derivatives	Benzene and substituted derivatives	C25H28N4O	418.259	400.226	3.2244	[M+NH4]+	0.77856	4	0.7309	rp	-	139031265	-	-	-	B	395.467	587.999	486.475	549.258	1094.46	404.784	1058.18	1051.74	1051.12	-
T3_negative	MW0138079	Epigallocatechin	Benzene and substituted derivatives	Benzene and substituted derivatives	C15H14O7	365.092	306.074	2.5345	[M+CH3COO]-	5.88605	1	0.892	rp	970-74-1	72277	HMDB0038361	-	C12136	B	1780.24	2456.25	3300.55	3207.93	3636.5	5622.6	4913.35	4890.91	5051.17	-
T3_negative	MW0002223	2,4-Toluenediamine	Benzene and substituted derivatives	Benzene and substituted derivatives	C7H10N2	121.082	122.084	2.521	[M-H]-	12.6939	3	0.7767	rp	95-80-7	7261	HMDB0041799	-	C14401	A	4491.53	3191.79	4410.79	3377.65	3580.49	3727.91	3049.53	3175.52	3132.24	-
T3_negative	MW0007696	Methyl 2-amino-4-(difluoromethoxy)-5-methoxybenzoate	Benzene and substituted derivatives	Benzene and substituted derivatives	C10H11F2NO4	282.029	247.066	4.4412	[M+Cl]-	1.53575	4	0.713	rp	923683-37-8	16228095	-	-	-	B	1919.65	1767.11	1604.14	1620.62	1186.7	1080.32	1673.47	1710.68	1676.41	-
T3_negative	MW0053768	Goshonoside F1	Benzene and substituted derivatives	Benzene and substituted derivatives	C26H44O8	519.268	484.304	1.4977	[M+Cl]-	1.2773	4	0.7191	rp	90851-24-4	13855760	HMDB0038539	-	-	B	5239.92	5324.97	4888.17	5460.26	5744.91	4762.51	5113.86	5167.16	5117.18	-
T3_negative	MW0009654	Rebamipide	Benzene and substituted derivatives	Benzene and substituted derivatives	C19H15ClN2O4	369.063	370.072	1.7334	[M-H]-	2.84117	2	0.7754	rp	90098-04-7 | 111911-87-6 | 139344-42-6	5042	-	43560	-	B	30529.5	19387	26490.1	18561.9	13958.7	21278.3	22098.1	22060.6	22082.2	-
T3_negative	MW0156504	Salicylanilide	Benzene and substituted derivatives	Benzene and substituted derivatives	C13H11NO2	212.076	213.079	6.1973	[M-H]-	4.89683	1	0.805	rp	87-17-2	6872	-	-	C18915	B	13109.7	11758.2	12695	11011.4	11351.7	12677.7	11983.5	11949.6	12008.4	-
T3_negative	MW0142130	2-((4-Methoxy-3-methyl-2-pyridylmethyl)sulfo)-5-trifluoromethyl-1H-benzimidazole	Benzene and substituted derivatives	Benzene and substituted derivatives	C16H14F3N3OS	398.072	353.081	2.3447	[M+HCOO]-	9.92849	3	0.7031	rp	86604-69-5	128828	-	-	-	B	14919.8	13709.1	6048.13	6833.02	8124.14	14873.2	13656.5	13481.7	13490.5	-
T3_negative	MW0008791	2-(acetylsulfamoyl)benzoic Acid	Benzene and substituted derivatives	Benzene and substituted derivatives	C9H9NO5S	242.01	243.02	6.3376	[M-H]-	4.86953	2	0.7445	rp	849067-18-1	11425048	-	45011	-	B	5874.08	5806.37	5591.81	5107.62	5469.17	5985.45	5559.09	5547.68	5667	-
T3_negative	MW0006426	Buclizine	Benzene and substituted derivatives	Benzene and substituted derivatives	C28H33ClN2	431.228	432.233	5.5711	[M-H]-	3.6832	3	0.7798	rp	82-95-1 | 163837-51-2 | 163837-52-3	6729	HMDB0014498	-	C07777	B	3347.95	3327.9	2762.93	2818.54	2300.88	3572	1736.21	2071.08	2068.04	-
T3_negative	MEDN0121	Enterodiol	Benzene and substituted derivatives	Phenolics	C18H22O4	361.175	302.152	4.0251	[M+CH3COO]-	14.3414	1	0.7421	rp	80226-00-2	115089	HMDB0005056	-	C18166	A	6467.21	5796.07	5878.62	5082.3	5274.77	5449.58	5896.13	5889.34	5907.23	-
T3_negative	MW0111619	1-(3-{5-[(3-chlorobenzyl)sulfonyl]-1H-tetrazol-1-yl}phenyl)ethanone	Benzene and substituted derivatives	Benzene and substituted derivatives	C16H13ClN4O3S	411.009	376.04	4.4413	[M+Cl]-	1.722	4	0.7088	rp	728031-02-5	2992225	-	-	-	B	2085.03	3486.68	3729.84	4526.73	3934.24	1723.1	3669.53	3661.3	3661.37	-
T3_negative	MW0003729	3,8-Dihydroxy-1-methylanthraquinone-2-carboxylic acid	Benzene and substituted derivatives	Benzene and substituted derivatives	C16H10O6	297.048	298.048	5.965	[M-H]-	14.8176	2	0.7206	rp	69119-31-9	14379528	HMDB0030830	-	-	B	548.242	341.421	964.21	492.152	722.255	381.152	2847.35	2887.09	2863.76	-
T3_negative	MEDN0084	Benzoic acid	Benzene and substituted derivatives	Benzene and substituted derivatives	C7H6O2	121.03	122.037	4.4761	[M-H]-	0.0141899	1	0.9005	rp	65-85-0	243	HMDB0001870	1297	C00539	B	14412.4	13148.4	31466.6	36513.6	14660.6	32495.9	25432.7	25303.7	25402.6	-
T3_negative	MW0005105	4-Hydroxyisophthalic acid	Benzene and substituted derivatives	Phenolic acids	C8H6O5	181.009	182.022	2.6211	[M-H]-	14.6856	2	0.7468	rp	636-46-4	12490	-	-	C21168	B	12866.8	12577.3	6428.56	4010.78	3923.58	7010.15	8532.64	8851.08	7340.55	-
T3_negative	MW0004830	4-chloro-3-{5-[(2,4,6-trioxotetrahydropyrimidin-5(2H)-ylidene)methyl]-2-furyl}benzoic acid	Benzene and substituted derivatives	Benzene and substituted derivatives	C16H9ClN2O6	359.015	360.015	0.5815	[M-H]-	7.7155	4	0.84	rp	6354-28-5	1348982	-	-	-	B	94051.4	94090.7	87067.5	77490.6	89820.9	88044	92346.9	92368.7	92221.8	-
T3_negative	MW0114815	Melilotoside	Benzene and substituted derivatives	Benzene and substituted derivatives	C15H18O8	378.098	326.1	2.0932	[M+Cl+NH3]-	4.7	3	0.8056	rp	618-67-7	5280759	HMDB0033581	-	C05158	B	11821.6	10256.2	11329	10177.6	9648.56	11405.5	10953.3	10950.8	11038.3	-
T3_negative	MW0169876	Streptomycin	Benzene and substituted derivatives	Benzene and substituted derivatives	C21H39N7O12	640.281	581.266	0.5644	[M+CH3COO]-	3.95939	3	0.8087	rp	57-92-1	19649	HMDB0015214	-	C00413	B	20424.9	19674.8	19302	18045.3	18646.4	20021.2	19212.1	18917.3	19196.8	ko01100
T3_negative	MW0009794	Sulfamethazine	Benzene and substituted derivatives	Benzene and substituted derivatives	C12H14N4O2S	277.07	278.084	3.3503	[M-H]-	20.6704	1	0.7334	rp	57-68-1	5327	HMDB0015522	-	C19530	B	16037.6	14471.3	14650.1	12760.7	12982.4	12612.2	13443.8	13389.5	13278	-
T3_negative	MW0002814	2-Bromo-N-(4-methylphenyl)acetamide	Benzene and substituted derivatives	Benzene and substituted derivatives	C9H10BrNO	225.988	226.995	0.7876	[M-H]-	1.06225	4	0.7241	rp	5343-65-7	94722	-	-	-	B	26286.5	23794.6	24204.9	21667.7	21007.8	27742.7	24531.4	24740.4	24804.2	-
T3_negative	MW0010082	Xylometazoline	Benzene and substituted derivatives	Benzene and substituted derivatives	C16H24N2	243.18	244.194	5.3625	[M-H]-	12.9433	3	0.765	rp	526-36-3	5709	HMDB0015640	-	C07913	B	9096.94	7211.56	7604.97	7964.19	4526.99	6835.81	9877.71	9979.79	9690.58	-
T3_negative	MW0126274	Psilocybine	Benzene and substituted derivatives	Benzene and substituted derivatives	C12H17N2O4P	343.104	284.093	2.6732	[M+CH3COO]-	13.2195	2	0.748	rp	520-52-5	10624	-	66689	C07576	B	33386.8	28993.4	32543.9	29105.2	28723.9	31928.4	26637.7	26539.8	27363.9	ko01100
T3_negative	MW0009738	Shikonin	Benzene and substituted derivatives	Benzene and substituted derivatives	C16H16O5	333.092	288.1	5.9015	[M+HCOO]-	14.2367	2	0.706	rp	517-89-5	479503	-	-	C15906 | C17412	B	2578.63	4042.24	11283.1	2957.88	11334.3	10748.9	9227.32	9324.75	9507.4	-
T3_negative	MW0146671	beta-Eucaine	Benzene and substituted derivatives	Benzene and substituted derivatives	C15H21NO2	246.147	247.157	5.1018	[M-H]-	7.35041	3	0.7402	rp	500-34-5	10373	-	-	-	B	5217.64	5164.43	6370.68	4542.38	780.774	4018.77	4615.16	4671.93	4590.49	-
T3_negative	MW0149206	Flaviolin	Benzene and substituted derivatives	Benzene and substituted derivatives	C10H6O5	265.033	206.022	1.8612	[M+CH3COO]-	10.8003	3	0.7607	rp	479-05-0	160478	-	-	C18012	B	256819	271477	186522	18415.2	128063	141833	54316	72555.6	56982.9	-
T3_negative	MW0009671	Rhein	Benzene and substituted derivatives	Benzene and substituted derivatives	C15H8O6	343.044	284.032	6.1673	[M+CH3COO]-	4.87335	1	0.729	rp	478-43-3	10168	HMDB0032876	-	C10401	B	64709.6	68349.2	63270.2	1106.13	53037.2	3148.15	30017.2	37023.5	32254.6	-
T3_negative	MW0001980	1H-Isoindole-1,3(2H)-dione, 2-(9,10-dihydro-9,10-dioxo-1-anthracenyl)-	Benzene and substituted derivatives	Benzene and substituted derivatives	C22H11NO4	352.066	353.069	2.8151	[M-H]-	2.01975	4	0.702	rp	40101-29-9	3084769	-	-	-	B	4003.11	4185.51	4593.32	3984.32	4618.29	4258.62	4139.63	4116.64	4122.41	-
T3_negative	MW0141704	1-Chloro-2-[1-(4-chlorophenyl)ethenyl]benzene	Benzene and substituted derivatives	Benzene and substituted derivatives	C14H10Cl2	282.981	248.016	1.3643	[M+Cl]-	12.5613	3	0.7143	rp	39274-24-3	247038	-	-	-	B	7128.7	5259.33	5885.52	4083.86	2982.53	7955.54	5647.38	5652.55	5622.98	-
T3_negative	MW0127350	4-Hydroxyphenyl thiocyanate	Benzene and substituted derivatives	Benzene and substituted derivatives	C7H5NOS	150.003	151.009	4.7893	[M-H]-	2.90824	2	0.8666	rp	3774-52-5	220327	HMDB0040578	-	-	B	11375.7	10169.1	11096.3	9998.53	9697.37	11120.4	10493.7	10499.1	10373	-
T3_negative	MW0003383	4-(pyridin-4-yl)-N-(m-tolyl)thiazol-2-amine	Benzene and substituted derivatives	Benzene and substituted derivatives	C15H13N3S	302.053	267.083	0.8633	[M+Cl]-	4.53725	2	0.7497	rp	315702-99-9	704473	-	45454	-	B	111658	102211	105083	101936	100076	109214	100992	100169	100752	-
T3_negative	MW0009336	Paraoxon	Benzene and substituted derivatives	Benzene and substituted derivatives	C10H14NO6P	327.05	275.056	4.4413	[M+Cl+NH3]-	3.3	3	0.8672	rp	311-45-5	9395	HMDB0013035	-	C06606	A	2134.69	3630.97	3154.81	3941.91	1500.09	3431.23	3712.92	3751.58	3614.85	-
T3_negative	MW0006026	2,2-Diphenylglycine	Benzene and substituted derivatives	Benzene and substituted derivatives	C14H13NO2	272.09	227.095	1.4077	[M+HCOO]-	4.38477	2	0.9107	rp	3060-50-2	18289	-	1858	-	B	72307.6	23755.9	74347.2	70517	66076.6	99673.9	31751.1	47050.1	43403.3	-
T3_negative	MW0118596	Hydroxyphenyllactic acid	Benzene and substituted derivatives	Phenolic acids	C9H10O4	181.052	182.058	2.6977	[M-H]-	1.94867	1	0.8798	rp	306-23-0	9378	HMDB0000755	5723	C03672	A	11402.6	9016.34	9943.7	10786.1	10369.7	11000.4	10126	10177.8	10126.9	-
T3_negative	MW0006163	n-(2-(4-Chloroanilino)-1-methyl-2-oxoethoxy)-3,5-bis(trifluoromethyl)benzamide	Benzene and substituted derivatives	Benzene and substituted derivatives	C18H13ClF6N2O3	513.078	454.052	1.7299	[M+CH3COO]-	13.07	2	0.7141	rp	285986-88-1	2726015	-	45253	-	B	7208.58	3590.28	6438.13	4653.33	3556.03	6047.75	5545.46	5576.71	5560.06	-
T3_negative	MW0006428	Bumetanide	Benzene and substituted derivatives	Benzene and substituted derivatives	C17H20N2O5S	363.108	364.109	4.8834	[M-H]-	12.5963	1	0.7277	rp	28395-03-1	2471	HMDB0015024	-	-	B	4177.47	1850.89	3369.31	3276.59	2653.11	2701.93	3342.04	3397.04	3491.93	-
T3_negative	MW0139389	Polydatin	Benzene and substituted derivatives	Benzene and substituted derivatives	C20H22O8	389.116	390.132	4.1113	[M-H]-	19.9994	1	0.7091	rp	27208-80-6	5281718	HMDB0030564	-	C10275	B	15798	26963.9	28190.9	26806.3	30358.6	25064.9	24939.1	24913	24805.7	-
T3_negative	MEDN1654	Gemfibrozil	Benzene and substituted derivatives	Benzene and substituted derivatives	C15H22O3	249.151	250.157	6.6866	[M-H]-	3.30463	1	0.8286	rp	25812-30-0	3463	HMDB0015371	-	C07020	B	4694.3	2885	3872.97	3399.7	6704.89	4949.75	4279.95	4409.6	4294.51	ko05207
T3_negative	MW0153924	Mirasan	Benzene and substituted derivatives	Benzene and substituted derivatives	C13H21ClN2	239.13	240.139	6.3945	[M-H]-	3.21425	3	0.7405	rp	2519-75-7	75648	-	-	-	B	69047.8	74850.9	119272	69253.9	68088.7	81543.9	50414.5	51453.5	51384.1	-
T3_negative	MW0114088	cis-coumarinic acid-beta-D-glucoside	Benzene and substituted derivatives	Benzene and substituted derivatives	C15H18O8	307.069	326.1	2.5518	[M-H2O-H]-	34.175	3	0.7589	rp	2446-60-8	5316113	HMDB0060077	-	C05839	B	3198.88	3464.99	5781.27	4649.33	5795.33	2016.69	4415.32	4472.72	4517.53	-
T3_negative	MW0005281	4-nitro-N-pyrimidin-2-ylbenzenesulfonamide	Benzene and substituted derivatives	Benzene and substituted derivatives	C10H8N4O4S	314.991	280.027	1.1019	[M+Cl]-	0.93625	4	0.7271	rp	24265-24-5	717942	-	-	-	B	15601.8	12370.4	13427.8	11448.6	12872.9	11655.9	13462.7	13601.8	13253.2	-
T3_negative	MW0007109	Fenamiphos	Benzene and substituted derivatives	Benzene and substituted derivatives	C13H22NO3PS	302.101	303.106	6.3376	[M-H]-	5.62589	2	0.8553	rp	22224-92-6	31070	HMDB0031787	-	C18659	B	61039	59044.4	60444.1	51576.4	54387.4	53828.3	53416.6	53092.1	53232.8	-
T3_negative	MW0006215	3,4-dimethoxy-N-(4-(3-nitrophenyl)thiazol-2-yl)benzenesulfonamide	Benzene and substituted derivatives	Benzene and substituted derivatives	C17H15N3O6S2	420.041	421.04	2.1036	[M-H]-	0.538429	4	0.7367	rp	199666-03-0	5282337	-	-	C14126	B	5122.33	5661.52	4194.13	2503.88	4023.92	5200.47	3492.3	3593.34	3544.7	-
T3_negative	MW0129934	1-O-E-Cinnamoyl-(6-arabinosylglucose)	Benzene and substituted derivatives	Benzene and substituted derivatives	C20H26O11	441.151	442.147	1.4977	[M-H]-	10.1508	4	0.801	rp	181373-66-0	131750995	HMDB0030294	-	-	B	7390.46	4504.79	7579.03	8046.17	8350.65	6841.05	7319.3	7472.38	7305.71	-
T3_negative	MW0000741	4-Tert-butylphenoxyacetic acid	Benzene and substituted derivatives	Benzene and substituted derivatives	C12H16O3	208.115	208.11	2.5263	[M-]-	8.59391	2	0.7224	rp	1798-04-5	15718	-	96360	-	B	374564	332590	367300	316814	315683	346342	340857	340498	340939	-
T3_negative	MW0117915	2,4-Dihydroxy-2H-1,4-benzoxazin-3(4H)-one	Benzene and substituted derivatives	Benzene and substituted derivatives	C8H7NO4	215.998	181.037	3.2634	[M+Cl]-	19.5458	2	0.7152	rp	17359-54-5	28495	HMDB0033733	-	C15770	B	2566.23	2471.8	2902.92	1898.75	2644.75	614.486	2012.13	2208.07	2122.48	ko01100
T3_negative	MW0121932	2-Amino-6-bromobenzothiazole	Benzene and substituted derivatives	Benzene and substituted derivatives	C7H5BrN2S	228.926	229.934	1.3176	[M-H]-	1.416	4	0.7158	rp	15864-32-1	85149	-	-	-	B	4989.6	5949.52	7404.66	5795.43	4473.15	7717.1	6092.72	6273.58	6143.07	-
T3_negative	MW0004825	4-Chloro-3,5-dimethoxybenzyl alcohol	Benzene and substituted derivatives	Benzene and substituted derivatives	C9H11ClO3	403.084	202.04	4.9455	[2M-H]-	17.5621	3	0.7051	rp	152570-76-8	84777014	HMDB0040933	-	-	B	1623.86	2247.41	2247.52	1917.58	3057	1776.6	2101.28	2106.67	2158.01	-
T3_negative	MW0006508	Carnocin CP 5	Benzene and substituted derivatives	Benzene and substituted derivatives	C23H19N3O5S	484.067	449.104	2.5172	[M+Cl]-	1.20573	4	0.7207	rp	149983-81-3	389574	HMDB0038222	-	-	B	6226.5	5193.02	5126.4	3297.43	5266.59	2129.65	3500.7	3144.17	3557.35	-
T3_negative	MEDP1251	2-Mercaptobenzothiazole	Benzene and substituted derivatives	Benzene and substituted derivatives	C7H5NS2	165.98	166.986	5.3625	[M-H]-	2.51727	1	0.9552	rp	149-30-4 | 118090-09-8 | 155-04-4 | 57948-09-1 | 27157-85-3	697993	HMDB0030524	-	-	B	2307.91	2722.58	2149.94	1966.28	2188.39	2713.1	2160.42	2183.82	2161.33	-
T3_negative	MW0157113	Sodium thiosalicylate	Benzene and substituted derivatives	Benzene and substituted derivatives	C7H5NaO2S	210.96	175.991	1.3523	[M+Cl]-	3.76375	3	0.7686	rp	134-23-6	23690429	-	-	C08171	B	4476.12	4491.16	5306.06	4713.81	3475.15	4368.22	4559.65	4593.44	4510.59	-
T3_negative	MW0006532	Chlorbromuron	Benzene and substituted derivatives	Benzene and substituted derivatives	C9H10BrClN2O2	292.959	293.959	0.4202	[M-H]-	1.9995	4	0.7024	rp	13360-45-7	25912	-	-	-	B	16388.5	1171.91	5890.15	19294.1	9605.63	12814	12469.3	10386.8	12871.9	-
T3_negative	MW0139156	Methylustin	Benzene and substituted derivatives	Benzene and substituted derivatives	C20H17Cl3O5	441.018	442.014	0.5988	[M-H]-	4.16976	4	0.9059	rp	1329-04-0	6450195	-	-	-	B	25225.7	24855.7	21972.3	19778.4	22556.3	22486.6	22692.8	22594	22694.2	-
T3_negative	MW0009792	Sulfamerazine	Benzene and substituted derivatives	Benzene and substituted derivatives	C11H12N4O2S	263.062	264.068	2.5432	[M-H]-	5.65668	2	0.7125	rp	127-79-7	5325	HMDB0015521	-	-	B	2514.23	2090.34	2838.85	2738.82	3300.82	2033.95	2847.02	2832.4	2724.66	-
T3_negative	MW0002614	Tyrphostin A51	Benzene and substituted derivatives	Phenolics	C13H8N4O3	267.055	268.06	1.5581	[M-H]-	10.7266	1	0.8427	rp	126433-07-6 | 122520-90-5	5328807	-	45250	-	B	34175	25350.7	29017.9	22492	19951.1	24287.5	24362.1	24270.5	23997.1	-
T3_negative	MEDN1183	Multifidol	Benzene and substituted derivatives	Phenolics	C11H14O4	209.081	210.089	4.3193	[M-H]-	1.2732	1	0.9398	rp	125074-06-8 | 39652-80-7	442919	-	-	-	B	11341.8	10067.1	10420.2	8730.8	9915.95	14161.3	11222.5	11209.3	11183.8	-
T3_negative	MW0004191	3-tert-Butyl-4-hydroxyanisole	Benzene and substituted derivatives	Phenolics	C11H16O2	239.13	180.115	6.6178	[M+CH3COO]-	2.01943	2	0.755	rp	121-00-6	8456	HMDB0059925	-	-	B	140027	127642	94275.5	61308.8	179418	59430.3	110373	109129	110327	-
T3_negative	MW0126572	Sparfloxacin	Benzene and substituted derivatives	Benzene and substituted derivatives	C19H22F2N4O3	391.174	392.166	6.5305	[M-H]-	9.78359	2	0.7413	rp	110871-86-8	60464	HMDB0015339	-	C07662	B	2108.84	1440.11	1610.23	2589.14	2444.42	3675.32	2081.57	2084.44	2122.57	ko02010
T3_negative	MW0154049	N-(2,6-Dimethylphenyl)-4-[[(diethylamino)acetyl]amino]benzamide	Benzene and substituted derivatives	Benzene and substituted derivatives	C21H27N3O2	352.206	353.21	1.4977	[M-H]-	1.682	4	0.9597	rp	107634-14-0	147129	-	-	-	B	17230.2	21768.1	15947.1	18100.1	14580.3	18085	20214.4	20243.7	20068.4	-
T3_negative	MW0006745	Dethiosecoemestrin	Benzene and substituted derivatives	Benzene and substituted derivatives	C27H20N2O10	567.078	532.112	2.0863	[M+Cl]-	0.385257	4	0.7405	rp	104799-51-1	128678	-	-	-	B	1864.53	1708.79	1728.39	1522.7	1278.45	2247.22	2103.37	2102.02	2075.16	-
T3_negative	MW0148585	Diphenyl carbonate	Benzene and substituted derivatives	Benzene and substituted derivatives	C13H10O3	213.056	214.063	4.5327	[M-H]-	0.691715	3	0.9276	rp	102-09-0	7597	-	-	-	B	4559.42	4873.41	5186.61	4853.22	4264.19	5180.58	3703.51	3903.94	3599.89	-
T3_negative	MW0005117	4-Hydroxyphenyl acetate	Benzene and substituted derivatives	Phenolics	C8H8O3	303.084	152.047	1.4977	[2M-H]-	7.17864	1	0.7307	rp	-	96009	HMDB0060390	-	C13636	A	46549.1	36952.4	42268.2	37649.6	34580.2	44435.9	41076.5	41327.1	41347.1	ko01100
T3_negative	MW0194006	Sulfanilamide, N1-(5-methyl-1,3,4-thiadiazol-2-yl)-	Benzene and substituted derivatives	Benzene and substituted derivatives	C9H10N4O2S2	329.031	270.024	3.4258	[M+CH3COO]-	18.7396	1	0.7263	rp	-	622973	HMDB0014715	-	-	B	33524.6	48241.1	44729.4	29695.2	31308.9	41699.7	30642.7	30924.1	30915.6	-
T3_negative	MW0002271	2,4-Dihydroxybenzophenone	Benzene and substituted derivatives	Benzene and substituted derivatives	C13H10O3	213.056	214.063	6.1449	[M-H]-	1.68961	2	0.9476	rp	-	8572	HMDB0240715	-	C14215	B	19307	17720.1	17396.8	15611	15752.8	17655.4	16765.4	16660.7	16727.1	-
T3_negative	MW0004457	4,4'-Sulfonyldiphenol	Benzene and substituted derivatives	Benzene and substituted derivatives	C12H10O4S	309.042	250.03	4.3014	[M+CH3COO]-	8.47774	2	0.8411	rp	-	6626	HMDB0240712	-	C14216	A	14668.8	14250.7	13333.7	12565.8	10840.6	11300.9	27383.8	27577.9	27532.5	-
T3_negative	MW0006100	Aurin	Benzene and substituted derivatives	Benzene and substituted derivatives	C19H14O3	289.088	290.094	6.2148	[M-H]-	3.34507	2	0.822	rp	-	5100	HMDB0248730	-	C14213	A	24339.4	21911.2	22346.5	21910.4	22195.7	25437.3	22510.8	22531.4	22519.6	-
T3_negative	MW0001371	1,4-Dihydroxy-2-naphthoic acid	Benzene and substituted derivatives	Benzene and substituted derivatives	C11H8O4	203.032	204.042	4.4761	[M-H]-	4.70354	2	0.7843	rp	-	671	HMDB0244212	-	C03657	A	3851.09	2167.61	11929.2	12461.7	6741.45	10744.9	9742.68	9880.15	9704.39	ko00130,ko01100,ko01240
T3_negative	MW0007271	Griseophenone B	Benzene and substituted derivatives	Benzene and substituted derivatives	C16H15ClO6	383.061	338.056	6.1673	[M+HCOO]-	9.19869	2	0.7743	rp	-	23872096	-	-	C18837	B	1740.13	1647.38	945.906	1967.42	1425.84	1347.13	4120.14	4189.23	4124.64	-
T3_negative	MW0007849	Morpholin-4-ium (4-methoxyphenyl)morpholin-4-ylphosphinodithioate	Benzene and substituted derivatives	Phenolics	C15H25N2O3PS2	348.044	376.104	2.8119	[M+CH3COO]-	21.9183	2	0.7712	rp	-	53393943	-	64818	-	B	5105.52	4053.53	4586.74	4255.55	4461.94	3893.49	4479.98	4482.93	4484.63	-
T3_negative	MW0006730	Desacetyl-nitazoxanide	Benzene and substituted derivatives	Benzene and substituted derivatives	C10H7N3O4S	324.039	265.016	4.4412	[M+CH3COO]-	23.6226	2	0.7545	rp	-	394397	HMDB0060597	-	-	B	36909	31315.1	32871.5	29601.1	28837.7	27085	31055.1	31206.3	31355.7	-
T3_negative	MW0007828	Modafinil Acid	Benzene and substituted derivatives	Benzene and substituted derivatives	C15H14O3S	273.067	274.066	5.154	[M-H]-	19.154	2	0.7396	rp	-	3085267	HMDB0061039	-	-	B	7252.72	5488.24	5009.83	3491.82	4423.93	5931.3	6676.33	6598.72	6621.41	-
T3_negative	MW0002892	2-Chloro-5-nitro-N-4-pyridinylbenzamide	Benzene and substituted derivatives	Benzene and substituted derivatives	C12H8ClN3O3	258.012	277.025	2.6211	[M-H2O-H]-	6.58891	2	0.7248	rp	-	2777391	HMDB0246142	-	-	B	3237.76	2462.43	3353.79	2666.61	2442.57	3057.77	2723.92	2687.17	2724.68	-
T3_negative	MW0115122	Phenol glucuronide	Benzene and substituted derivatives	Benzene and substituted derivatives	C12H14O7	305.048	270.074	1.7334	[M+Cl]-	7.56778	2	0.7093	rp	-	87235	HMDB0060014	-	-	B	12948.9	9046.15	12775.7	8914.13	5934.31	11010.4	9984.41	9793.01	9743.77	-
T3_negative	MW0157415	Tetracenomycin B1	Benzene and substituted derivatives	Benzene and substituted derivatives	C20H14O6	349.077	350.079	1.7334	[M-H]-	13.1056	3	0.7184	rp	-	443789	-	-	-	B	76865.2	54681.5	68715.4	50786.2	37824.5	59375	58416.8	58216.6	58472.3	-
T3_negative	ZINC33832592	[2,3-dihydroxy-5-[[(2R,3S,4S,5R,6R)-3,4,5-trihydroxy-6-methoxyoxan-2-yl]methoxycarbonyl]phenyl] 3,4,5-trihydroxybenzoate	Benzene and substituted derivatives	Benzene and substituted derivatives	C21H22O14	497.098	498.101	5.0497	[M-H]-	0.0891385	4	0.9978	rp	-	5319584	-	-	-	B	22183.7	33452	30020.8	33724.9	42461	38428.3	28173.9	29323.3	25946.7	-
T3_negative	MW0165517	(2E)-3-[(2R,3R)-3-formyl-2-(4-hydroxy-3-methoxyphenyl)-7-methoxy-2,3-dihydro-1-benzofuran-5-yl]prop-2-enoate	Benzene and substituted derivatives	Benzene and substituted derivatives	C20H17O7-	368.093	369.097	2.0984	[M-H]-	1.07	4	0.974	rp	-	90657686	-	-	-	B	12244	12468.8	7419.56	8647.98	12812.7	2917.73	12760.6	12760.7	12749.7	-
T3_negative	MW0162088	1,4,7-Trihydroxy-6,8-dimethoxy-2-methylanthraquinone	Benzene and substituted derivatives	Benzene and substituted derivatives	C17H13O7-	328.06	329.066	0.8633	[M-H]-	2.18025	4	0.9484	rp	-	25200504	-	-	-	B	374361	355814	353190	360582	318687	327195	307609	306910	304316	-
T3_negative	ZINC14756825	7-Methoxy-2-(6-methoxy-1,3-benzodioxol-5-yl)chromen-4-one	Benzene and substituted derivatives	Benzene and substituted derivatives	C18H14O6	325.065	326.079	0.8633	[M-H]-	2.59575	4	0.9391	rp	-	11131197	-	-	-	B	11665.2	11752	12266.8	10818.8	11670.2	11963.8	11155.8	10906.6	11085.9	-
T3_negative	MW0008683	N-[3-(1H-tetrazol-5-yl)phenyl]-3-(trifluoromethyl)benzamide	Benzene and substituted derivatives	Benzene and substituted derivatives	C15H10F3N5O	368.046	333.084	4.4412	[M+Cl]-	4.36175	4	0.902	rp	-	6465386	-	-	-	B	6908.7	3822.97	7674.27	6209.01	6037.62	6086.36	6716.23	6796.38	6788.58	-
T3_negative	ZINC14721718	Curtisian N	Benzene and substituted derivatives	Benzene and substituted derivatives	C26H24O10	495.134	496.137	2.1036	[M-H]-	6.1533	4	0.8676	rp	-	10051500	-	-	-	B	3838.57	4159.54	3601.81	3411.61	2448.68	3943	4194.2	4202.62	4199.63	-
T3_negative	ZINC27106416	Siphonol A	Benzene and substituted derivatives	Benzene and substituted derivatives	C40H46O13	733.302	734.294	6.1973	[M-H]-	12.472	4	0.768	rp	-	10952715	-	-	-	B	12238.6	11821.1	11459.9	9013.13	10164	10664.8	10070.4	10096.7	10060.8	-
T3_negative	MW0002293	5-(3-Methoxy-4-((4-methoxybenzyl)oxy)benzyl)pyrimidine-2,4-diamine	Benzene and substituted derivatives	Phenolics	C20H22N4O3	365.168	366.169	1.4977	[M-H]-	0.47675	4	0.7382	rp	-	11617559	HMDB0252989	-	-	B	5559.62	4767.97	5557.65	4830.32	5389.34	4495.87	4023.09	4267.31	3820.2	-
T3_negative	MW0009539	Tyrphostin A25	Benzene and substituted derivatives	Phenolics	C10H6N2O3	201.026	202.038	1.6273	[M-H]-	7.36314	2	0.7476	rp	-	2061	HMDB0259357	-	-	A	30343.5	22628.7	25363	25937.8	32420.2	23704.9	19469.9	19466.9	19005.3	-
HILIC_negative	MW0001891	Benzoic acid, 2-[[(4-chloro-3-nitrophenyl)sulfonyl]amino]-	Benzene and substituted derivatives	Benzene and substituted derivatives	C13H9ClN2O6S	354.993	355.987	3.7477	[M-H]-	12.5388	4	0.7671	hilic	68003-38-3	106350	-	-	-	B	6817.68	7162.08	6996.64	6128.98	6938.45	6754.8	6735.62	6859.15	6697.77	-
HILIC_negative	MW0144975	alpha-Kosin	Benzene and substituted derivatives	Benzene and substituted derivatives	C25H32O8	459.203	460.21	0.8378	[M-H]-	4.3793	3	0.7547	hilic	568-50-3	160529	-	-	C10704	B	88445.4	109045	90826	103163	54827.1	56219	81261.6	80724	81753.7	-
HILIC_negative	MW0009078	N-Hydroxy-2-phenylacetamide	Benzene and substituted derivatives	Benzene and substituted derivatives	C8H9NO2	186.038	151.063	3.184	[M+Cl]-	13.9593	2	0.7085	hilic	5330-97-2	220184	-	44449	-	B	3637.35	3302.45	3550.83	4410.48	4864.34	4984.39	3981.07	3971.63	4139.4	-
HILIC_negative	MW0002264	2,4-Dihydroxy-3,6-dimethylbenzoic acid	Benzene and substituted derivatives	Benzene and substituted derivatives	C9H10O4	217.03	182.058	2.6472	[M+Cl]-	6.99513	2	0.7493	hilic	4707-46-4	736228	-	43818	-	B	57619.7	69198.9	73252.8	62521.9	54885.2	38764.8	63751.8	63129.4	58401.8	-
HILIC_negative	MW0113960	Benzbromarone	Benzene and substituted derivatives	Benzene and substituted derivatives	C17H12Br2O3	422.911	423.913	4.0354	[M-H]-	0.8648	4	0.9788	hilic	3562-84-3	2333	HMDB0041834	-	-	B	240759	218150	228951	235265	227559	254573	238253	243530	243425	-
HILIC_negative	MW0008726	N-[4-[[6-Methoxy-7-[3-(4-morpholinyl)propoxy]-4-quinazolinyl]amino]phenyl]benzamide	Benzene and substituted derivatives	Benzene and substituted derivatives	C29H31N5O4	548.203	513.238	1.0661	[M+Cl]-	11.5392	2	0.8293	hilic	331771-20-1	9914412	-	45566	C74700	B	23271.8	26008.2	26760.5	32565	27910.5	28122.8	16323.9	17396.1	17598.1	-
HILIC_negative	MW0009715	4-Chloro-5-sulfamoylanthranilic acid	Benzene and substituted derivatives	Benzene and substituted derivatives	C7H7ClN2O4S	248.978	249.982	1.3962	[M-H]-	6.06226	2	0.9448	hilic	3086-91-7	76523	HMDB0060761	-	-	B	24550.6	22031.4	22797.4	17017.1	19089.8	13565.4	17325.9	17318	17006.6	-
HILIC_negative	MW0142555	2-phenyl-N-(5-propan-2-yl-2-thiazolyl)acetamide	Benzene and substituted derivatives	Benzene and substituted derivatives	C14H16N2OS	259.091	260.098	3.184	[M-H]-	0.762045	2	0.762	hilic	267654-00-2	16760027	-	45242	-	B	10778.3	9286.95	9793.61	11936	12702.5	13378.1	10165.7	10074.2	10344.9	-
HILIC_negative	MW0157042	TFPI hydrochloride	Benzene and substituted derivatives	Benzene and substituted derivatives	C10H12ClF3N2S	283.03	284.036	2.6582	[M-H]-	2.04625	4	0.7014	hilic	163490-78-6	2733516	-	64868	-	B	8630.73	10721.9	24089.2	12867.4	17178	10147	11620.5	12011.9	11010	-
HILIC_negative	MW0143232	4-[(E)-(3,5-Diamino-1h-Pyrazol-4-Yl)diazenyl]phenol	Benzene and substituted derivatives	Benzene and substituted derivatives	C9H10N6O	217.083	218.092	2.2688	[M-H]-	2.99917	2	0.7506	hilic	140651-18-9	135398514	-	45317	-	B	3724.69	1974.26	2394.76	2088.19	2095.56	2480.79	2600.75	2540.42	2484.14	-
HILIC_negative	MW0148890	Enalkiren	Benzene and substituted derivatives	Benzene and substituted derivatives	C35H56N6O6	655.423	656.426	0.7619	[M-H]-	9.98376	3	0.7225	hilic	113082-98-7	60594	-	-	C07466	B	6427.27	9492.59	4998.64	7948.31	6179.6	6692.6	5519.81	5390.5	5476.86	-
HILIC_negative	MW0158049	Tricrozarin A	Benzene and substituted derivatives	Benzene and substituted derivatives	C13H10O8	293.034	294.038	1.6311	[M-H]-	10.5816	3	0.7503	hilic	107817-60-7	129974	-	-	-	B	104199	70948.3	69082.3	42643.7	23023.1	83497.6	70161.5	67961.1	60914.1	-
HILIC_negative	MW0009089	Nimesulide	Benzene and substituted derivatives	Benzene and substituted derivatives	C13H12N2O5S	307.035	308.047	1.6496	[M-H]-	10.8952	1	0.7523	hilic	-	4495	HMDB0255611	-	-	B	16534.5	11821.4	11059.2	7407.46	6217.26	13344.1	11798.8	12071.9	10859.4	-
HILIC_negative	MW0006781	Dicamba	Benzene and substituted derivatives	Benzene and substituted derivatives	C8H6Cl2O3	200.953	219.969	1.388	[M-H2O-H]-	13.3693	2	0.7945	hilic	-	3030	HMDB0251180	-	C18597	B	2812.32	2319.61	3821.73	3651.07	2694.45	3747.73	3052.19	3250.08	3334.5	-
HILIC_negative	MW0141201	1-[2-Hydroxy-3-(4-phenoxyphenoxy)propyl]-3-(2-methylpropanoyl)-1H-indole-5-carboxylic acid	Benzene and substituted derivatives	Benzene and substituted derivatives	C28H27NO6	472.178	473.184	3.267	[M-H]-	1.7218	2	0.7683	hilic	-	46868635	-	64781	-	B	9290.97	10195.2	8669.21	6283.44	6140	6751.45	8347.96	7950.55	7452.56	-
HILIC_negative	MW0006787	Dichlorprop	Benzene and substituted derivatives	Benzene and substituted derivatives	C9H8Cl2O3	232.984	233.985	1.2918	[M-H]-	15.6011	2	0.7646	hilic	-	8427	HMDB0251202	-	C11020	B	15831.8	14178.1	15512.1	14717.6	13512.2	15797.7	14762.4	14758.4	14888.9	-
HILIC_negative	MW0000560	2,4,5-Trichlorophenoxyacetic acid	Benzene and substituted derivatives	Benzene and substituted derivatives	C8H5Cl3O3	288.909	253.93	1.2918	[M+Cl]-	21.2573	2	0.7162	hilic	-	1480	HMDB0245475	-	C07100	A	5834.35	4747.79	4766.97	6443.47	2203.85	4411.71	5272.31	5274.02	5212.01	ko01100
HILIC_negative	MW0013434	2-Decaprenyl-6-methoxy-3-methyl-1,4-benzoquinone	Benzene and substituted derivatives	Benzene and substituted derivatives	C58H88O3	831.66	832.673	1.145	[M-H]-	7.26681	3	0.7857	hilic	-	25010748	HMDB0060251	-	-	B	8407.48	10258.5	9206.86	6087.48	4094.09	5185.94	8995.41	8990.04	8835.69	-
HILIC_negative	MW0149286	(2S,3S)-2-(dimethylamino)-N-[(2Z,6S,9S,10S)-6-isobutyl-10-isopropyl-5,8-dioxo-11-oxa-4,7-diazabicyclo[10.2.2]hexadeca-1(14),2,12,15-tetraen-9-yl]-3-methyl-pentanamide	Benzene and substituted derivatives	Benzene and substituted derivatives	C28H44N4O4	499.333	500.336	1.105	[M-H]-	8.41968	3	0.7704	hilic	-	5281587	HMDB0030199	-	-	B	46387.2	81064.2	61378.9	28718.5	13430.2	12009.2	52853.2	50105.5	47508.9	-
HILIC_negative	MW0002593	2,3,4-Trimethoxyhippuric acid	Benzene and substituted derivatives	Benzene and substituted derivatives	C12H15NO6	304.053	269.09	1.8629	[M+Cl]-	17.4223	3	0.7342	hilic	-	26435014	HMDB0142117	-	-	B	6352.41	4406.54	5813.56	3217.38	2210.89	3983.69	4161.49	4230.35	4113.66	-
HILIC_negative	MW0164778	3,4-Dihydroxy-5-all-trans-octaprenylbenzoate	Benzene and substituted derivatives	Phenolics	C47H69O4-	696.498	697.52	0.8927	[M-H]-	9.44197	4	0.8118	hilic	-	54740337	-	-	-	B	13947.8	10290.5	13304.8	10804.7	13091	13710	11727.9	11498.9	11723.9	-
T3_positive	MW0053750	Glycochenodeoxycholic acid	Bile acids	Bile acids	C26H43NO5	450.315	449.314	6.2845	[M+H]+	14.3392	1	0.8165	rp	640-79-9	12544	HMDB0000637	-	C05466	A	4817.88	3076.61	5104.46	3742.86	6092.51	5038.63	6149.82	5991.04	5878.35	ko00120,ko04976,ko04979
T3_positive	MW0053754	Glycocholic acid	Bile acids	Bile acids	C26H43NO6	466.322	465.309	5.5874	[M+H]+	16.0554	1	0.8162	rp	475-31-0	10140	HMDB0000138	-	C01921	A	6872.74	6502.7	505.367	4467.53	7532.9	7212.93	11887.9	11798.3	11600.7	ko00120,ko01100,ko04976,ko04979
T3_positive	MW0054394	Lithocholic acid	Bile acids	Bile acids	C24H40O3	359.284	376.298	6.2218	[M+H-H2O]+	21.1545	1	0.7235	rp	434-13-9	9903	HMDB0000761	209	C03990	A	627995	532123	586132	410955	503764	532322	536035	537275	536358	ko04976
T3_positive	MW0061088	Petromyzonol	Bile acids	Bile acids	C24H42O4	395.305	394.308	6.2218	[M+H]+	21.877	2	0.8229	rp	28979-29-5	5284054	-	-	-	A	269890	226327	249230	188981	222787	231390	233314	235227	234826	-
T3_negative	MW0017091	Cholic acid	Bile acids	Bile acids	C24H40O5	467.311	408.288	6.0922	[M+CH3COO]-	23.1267	1	0.7111	rp	81-25-4	221493	HMDB0000619	206	C00695	A	7302.35	6057.01	6090.75	6182.45	5827.25	6063.32	6277.41	6296.21	6203.58	ko00120,ko01100,ko04976
T3_positive	MW0114730	L-Fucose	Carbohydrates and Its metabolites	Carbohydrates and Its metabolites	C6H12O5	231.02	164.069	4.3032	[M-2H+3Na]+	3.175	3	0.8699	rp	87-96-7	17106	HMDB0000174	-	C01019	A	4762.2	4458.1	4815.92	1648.27	4296.64	4700.63	5030.06	5009.89	4993.83	ko00051,ko00520,ko01100,ko01250,ko04625
T3_positive	MW0152126	L-arabinonic acid	Carbohydrates and Its metabolites	Sugar acids	C5H10O6	167.053	166.048	7.751	[M+H]+	4.85	3	0.7785	rp	608-53-7	6602426	HMDB0000539	-	C00545	B	1554.19	1215.92	1460.71	588.826	684.65	1503	4541.41	4537.57	4473.54	ko00053,ko01100
T3_positive	MW0169374	Lactose	Carbohydrates and Its metabolites	Sugars	C12H22O11	365.101	342.116	0.7921	[M+Na]+	9.28752	1	0.954	rp	5965-66-2	6134	HMDB0041627	-	C01970	A	68752.4	67256.4	74009.5	49820.1	68455.8	68828.5	70425.6	70524.1	70164.2	-
T3_positive	MW0148805	D-Xylonic acid	Carbohydrates and Its metabolites	Sugar acids	C5H10O6	167.053	166.048	7.3111	[M+H]+	5.1	3	0.7726	rp	526-91-0	6602431	HMDB0059750	-	C00502	B	966.584	1076.6	948.08	398.051	892.983	544.872	2246.79	2870.84	2822.94	ko00040,ko01100
T3_positive	MW0114685	Erythrulose	Carbohydrates and Its metabolites	Sugars	C4H8O4	186.994	120.042	0.6965	[M-2H+3Na]+	4.4	3	0.8503	rp	40031-31-0	162406	HMDB0006293	-	-	A	1.82551e+06	1.63296e+06	1.72346e+06	1.53046e+06	1.5059e+06	1.57699e+06	1.5629e+06	1.55656e+06	1.56339e+06	-
T3_positive	MW0193983	Polymannose	Carbohydrates and Its metabolites	Sugars	C6H12O6	163.058	180.063	0.8105	[M+H-H2O]+	5.975	3	0.7641	rp	31103-86-3	161658	HMDB0062473	-	-	A	5196.36	5709.71	8402.07	8259.03	9517.91	6073.78	6590.38	6543.76	6590.21	-
T3_positive	MW0007525	L-ribulose	Carbohydrates and Its metabolites	Sugars	C5H10O5	173.039	150.053	0.8105	[M+Na]+	5.70315	2	0.7684	rp	2042-27-5 | 488-84-6	644111	HMDB0003371	63110	-	B	1379.88	2709.98	3227.76	2116.8	886.012	2932.3	3156.58	3155	3043.52	-
T3_positive	MW0054416	L-rhamnulose	Carbohydrates and Its metabolites	Sugars	C6H12O5	240.997	164.069	0.9389	[M-H+2K]+	22.575	3	0.732	rp	14807-05-7	14461866	HMDB0010207	-	C00861	A	6355.61	5364.89	5689.06	3789.15	4767.79	6483.47	4334.73	4460.46	4566.53	ko00051,ko01100
T3_positive	MW0054336	alpha-L-Fucp-(1->3)-[beta-D-Galp-(1->4)]-D-GlcpNAc	Carbohydrates and Its metabolites	Sugars	C20H35NO15	552.189	529.201	4.2848	[M+Na]+	4.28128	2	0.8655	rp	-	11813424	-	-	-	A	2218.47	1748.99	2365.43	2294.06	3766.69	3398.89	2779.25	2840.06	2819.65	-
T3_negative	MW0115489	Xylitol	Carbohydrates and Its metabolites	Sugar alcohols	C5H12O5	133.052	152.069	1.6384	[M-H2O-H]-	1.53843	1	0.7585	rp	87-99-0	6912	HMDB0002917	-	C00379	B	2908.69	2407.95	2953.99	1533.71	1593.53	1223.67	2195.39	2190.75	2138.12	ko00040,ko01100,ko02010
T3_negative	MW0154950	1-O-(4-Coumaroyl)-beta-D-glucose	Carbohydrates and Its metabolites	Sugars	C15H18O8	361.072	326.1	2.5518	[M+Cl]-	6.075	3	0.7616	rp	7139-64-2	14158117	-	-	-	A	10252.1	18266.2	16065.3	15006.4	15015.2	15909.5	15907	15908	15848.1	-
T3_negative	MW0103719	Trifluridine	Carbohydrates and Its metabolites	Sugars	C10H11F3N2O5	355.074	296.062	3.2112	[M+CH3COO]-	13.294	1	0.7262	rp	70-00-8	6256	HMDB0014576	-	-	A	12290.4	1547.67	23234	20487.4	25892.6	19247.9	18948.1	19057.5	19357.5	-
T3_negative	MEDP1055	DL-Glyceraldehyde 3-Phosphate	Carbohydrates and Its metabolites	Sugar derivatives	C3H7O6P	168.991	169.998	1.3698	[M-H]-	1.60443	1	0.9595	rp	591-59-3	729	HMDB0001112	149	C00661	A	21662.9	18956.1	17726.2	13518.6	12565	21334.2	16959.3	16870	17013.8	-
T3_negative	MW0114220	Glucuronic Acid	Carbohydrates and Its metabolites	Sugar acids	C6H10O7	387.074	194.043	1.7299	[2M-H]-	0.619489	1	0.721	rp	528-16-5	94715	HMDB0000127	161	C00191	B	6273.51	5113.52	6212.06	4283.51	452.984	4870.28	5327.4	5238.43	5200.76	ko00040,ko00053,ko00520,ko00562,ko01100,ko01240,ko01250
T3_negative	MW0113873	Aldehydo-D-Galactose	Carbohydrates and Its metabolites	Sugars	C6H12O6	179.057	180.063	0.7476	[M-H]-	2.525	3	0.7344	rp	26566-61-0 | 530-27-8	3037556	HMDB0000143	-	C01582	B	5632.38	6451.06	6827.58	7871.78	7796.34	8717.08	7739.58	7697.96	7978.28	-
T3_negative	MW0113273	Melibiose	Carbohydrates and Its metabolites	Sugars	C12H22O11	377.087	342.116	0.7876	[M+Cl]-	2.70718	1	0.7996	rp	-	872	HMDB0000048	-	-	B	112096	110755	104641	98621.2	120205	112492	117777	118260	118253	-
T3_negative	MW0115536	Glucose	Carbohydrates and Its metabolites	Sugars	C6H12O6	215.034	180.063	0.7833	[M+Cl]-	4.87498	1	0.7972	rp	-	5793	HMDB0304632	-	C00031	A	145750	194786	247756	264626	303757	211680	231878	231892	231181	ko00010,ko00030,ko00052,ko00500,ko00520,ko00524,ko01100,ko02010,ko04066,ko04068,ko04152,ko04742,ko04910,ko04911,ko04917,ko04922,ko04930,ko04931,ko04932,ko04933,ko04973,ko04976,ko04978,ko05230,ko05415
HILIC_negative	MEDTN01088	Lyxo-2-Hexulose	Carbohydrates and Its metabolites	Carbohydrates and Its metabolites	C6H12O6	215.033	180.063	2.3142	[M+Cl]-	0.127735	1	0.7967	hilic	87-81-0 | 17598-81-1	92092	HMDB0000660	-	-	A	33495.2	49832.5	60053.6	36024.6	45656.6	29133.3	42518.2	44481.9	42006.5	-
HILIC_negative	MW0114952	N-Acetyl-D-glucosamine	Carbohydrates and Its metabolites	Sugar derivatives	C8H15NO6	256.06	221.09	2.1132	[M+Cl]-	1.78121	1	0.8053	hilic	7512-17-6	439174	HMDB0000215	3356	C00140	A	49575.4	57487.4	53136.7	24055.6	29499.6	38649.6	43448.1	44161.5	42181.5	ko00520,ko01100,ko01250,ko02010
HILIC_negative	MW0114742	Linustatin	Carbohydrates and Its metabolites	Carbohydrates and Its metabolites	C16H27NO11	408.162	409.158	3.2761	[M-H]-	24.1177	2	0.7199	hilic	72229-40-4	119301	-	66912	C08333	A	17959.2	13886.8	17259.1	12576.7	11102.3	12885.1	14137.2	13991.4	12924.1	-
HILIC_negative	MW0114304	Maltose	Carbohydrates and Its metabolites	Sugars	C12H22O11	387.114	342.116	3.8736	[M+HCOO]-	1.11784	1	0.948	hilic	69-79-4	10991489	HMDB0000163	413	C00208	A	106038	123696	127507	102363	150905	128884	114395	113253	112395	ko00500,ko01100,ko02010,ko04742,ko04973
HILIC_negative	MW0111715	Xylobiose	Carbohydrates and Its metabolites	Sugars	C10H18O9	281.087	282.095	3.8553	[M-H]-	3.11317	2	0.7504	hilic	6860-47-5 | 83113-52-4	439538	HMDB0029894	-	C01630	B	4292.85	5086.8	5542.85	3668.04	5226.19	4780.96	4158.82	4223.56	4150.48	ko02010
HILIC_negative	MW0114377	Xylose	Carbohydrates and Its metabolites	Sugars	C5H10O5	299.097	150.053	3.5496	[2M-H]-	3.25484	1	0.7268	hilic	58-86-6	135191	HMDB0000098	314	C00181	A	6095.8	6182.53	8022.31	10069.7	9606.82	9863.31	7993.35	7747.32	8053.59	ko00040,ko00520,ko01100,ko02010
HILIC_negative	MW0114156	Fructose	Carbohydrates and Its metabolites	Sugars	C6H12O6	179.057	180.063	2.6582	[M-H]-	2.83578	1	0.9618	hilic	57-48-7 | 30237-26-4 | 25702-76-5 | 139686-85-4	5984	HMDB0062538	-	-	A	63801.4	115701	173855	208647	312353	141153	155898	157599	157548	-
HILIC_negative	MW0115305	Sorbitol	Carbohydrates and Its metabolites	Sugar alcohols	C6H14O6	181.072	182.079	2.5676	[M-H]-	0.709248	1	0.8549	hilic	50-70-4	5780	HMDB0000247	-	C00794	A	36268.2	45725.6	43702.8	56226.1	66452.2	56823.8	49556.7	49421.4	50341.3	ko00051,ko00052,ko01100,ko02010,ko05415
HILIC_negative	MW0114356	aldehydo-D-ribose	Carbohydrates and Its metabolites	Sugars	C5H10O5	195.051	150.053	3.075	[M+HCOO]-	1.1521	1	0.7963	hilic	50-69-1 | 34466-20-1	5311110	-	-	-	A	24659.2	18567.3	18216.1	18163.1	18367.9	19273	19550.7	19348.7	19256.5	-
HILIC_negative	MEDN0844	Stachyose	Carbohydrates and Its metabolites	Sugars	C24H42O21	711.221	666.222	5.4301	[M+HCOO]-	6.19504	1	0.7597	hilic	470-55-3	439531	HMDB0003553	6951	C01613	A	11977.4	12886.6	10521.4	11058.3	16018.4	12963.9	12539.5	12656.5	12527.2	ko00052,ko01100
HILIC_negative	MEDN0657	D-Xylulose 5-phosphate	Carbohydrates and Its metabolites	Phosphate sugars	C5H11O8P	229.012	230.019	4.5725	[M-H]-	1.35626	1	0.7895	hilic	4212-65-1	439190	HMDB0000868	5829	C00231	A	15434.7	12092.8	13699.6	11256.7	9218.98	12450.9	11508.7	11503.7	11381.3	ko00030,ko00040,ko00053,ko01100,ko01200,ko01230,ko04918
HILIC_negative	MEDN1534	Tagatose	Carbohydrates and Its metabolites	Sugars	C6H12O6	179.056	180.063	2.3142	[M-H]-	2.16079	1	0.8669	hilic	41847-61-4	439312	HMDB0003418	-	C00795	A	12771.2	22048.6	23669.2	31316.4	32574.2	26628.4	24858.8	25069.8	25869.6	ko00052,ko01100
HILIC_negative	MW0112809	3'-Fucosyllactose	Carbohydrates and Its metabolites	Sugars	C18H32O15	487.177	488.174	3.5316	[M-H]-	19.8154	2	0.7085	hilic	41312-47-4	161460	HMDB0002094	-	-	A	11792.6	12918.1	15804.9	9096.84	9404.42	8835.53	14336.5	14434.4	13285.6	-
HILIC_negative	MEDN0227	D-Glucose 6-Phosphate	Carbohydrates and Its metabolites	Phosphate sugars	C6H13O9P	259.022	260.03	4.9814	[M-H]-	3.06278	1	0.9569	hilic	15209-11-7	439284	HMDB0304534	-	-	A	18299.4	12162.3	13371.7	9691.44	6643.44	17379.9	14071.1	13652.1	13726.6	-
HILIC_negative	MW0115229	Ribose-1-phosphate	Carbohydrates and Its metabolites	Phosphate sugars	C5H11O8P	275.02	230.019	3.5132	[M+HCOO]-	11.3725	1	0.792	hilic	14075-00-4	439236	HMDB0001489	6273	C00620	A	3162.86	2985.86	3280.89	3652.67	3971.23	3870.3	3719.82	3708.77	3853.32	ko00030,ko00230,ko01100
HILIC_negative	MW0114177	Arabinose-5-phosphate	Carbohydrates and Its metabolites	Phosphate sugars	C5H11O8P	229.012	230.019	4.3278	[M-H]-	0.674442	1	0.8748	hilic	13137-52-5	188324	HMDB0011734	-	C01112	A	16548.9	13940.5	14379.7	10235.9	10118.5	13029.9	12721.3	12698.6	12651.8	ko01100,ko01250
HILIC_negative	MW0114809	D-Mannose 6-phosphate	Carbohydrates and Its metabolites	Phosphate sugars	C6H13O9P	259.022	260.03	4.6851	[M-H]-	1.44577	1	0.9209	hilic	-	65127	HMDB0304312	-	C00275	A	18774.8	18592.8	24740.1	11617.5	9126.03	17539	15779.1	15795.4	15425.9	ko00051,ko00520,ko01100,ko01240,ko01250,ko04142
HILIC_negative	MW0114231	D-glycero-L-galacto-Octulose	Carbohydrates and Its metabolites	Sugars	C8H16O8	239.077	240.084	3.2028	[M-H]-	1.206	4	0.7207	hilic	-	18618152	HMDB0029954	-	-	A	3476.53	4268.28	4105.9	3662.21	3793.2	4075.32	3948.45	3926.26	3918.54	-
T3_positive	MW0054757	Menatetrenone	CoEnzyme and vitamins	CoEnzyme and vitamins	C31H40O2	445.307	444.303	7.2758	[M+H]+	7.77314	2	0.8592	rp	863-61-6	5282367	HMDB0030017	-	C00828	B	2778.18	3175.61	3252	2012.8	2665.87	1688.44	2328.26	2212.64	2301.04	ko00130,ko01100,ko01240,ko04977
T3_positive	MW0155541	Vitamin K1 2,3-epoxide	CoEnzyme and vitamins	CoEnzyme and vitamins	C31H46O3	484.378	466.345	7.2758	[M+NH4]+	2.82641	2	0.8245	rp	85955-78-8	5280845	HMDB0002972	3030	C05849	B	18400.8	17702.5	18975.3	13905	14606.3	13925.8	15177.9	15157.9	15123.3	ko00130,ko01100,ko01240
T3_positive	MEDP0250	Riboflavin	CoEnzyme and vitamins	CoEnzyme and vitamins	C17H20N4O6	377.141	376.138	3.1794	[M+H]+	8.99591	1	0.9338	rp	83-88-5	493570	HMDB0000244	-	C00255	B	11465.3	9795.61	10620.5	8034.21	11103.1	11329.2	10808.2	11350.9	10899.9	ko00740,ko01100,ko01240,ko02010,ko04977
T3_positive	MW0063311	7a-methyl-1a-[(E)-3,7,11,15-tetramethylhexadec-2-enyl]-2,7-dihydronaphtho[2,3-b]oxirene-2,7-diol	CoEnzyme and vitamins	CoEnzyme and vitamins	C31H50O3	468.384	470.376	7.8254	[M+NH4]+	6.21583	3	0.7405	rp	81382-12-9	5280846	HMDB0004198	-	-	A	103669	99207.4	98411.3	88932.9	86908.3	75176.6	73973.5	73296.9	73319.4	-
T3_positive	MW0109041	Pantothenic acid	CoEnzyme and vitamins	CoEnzyme and vitamins	C9H17NO5	220.116	219.111	2.3677	[M+H]+	4.61574	1	0.9483	rp	79-83-4	6613	HMDB0000210	-	C00864	A	118501	105114	114654	91009.3	115538	120341	117463	117356	117664	ko00410,ko00770,ko01100,ko01240,ko04977
T3_positive	MW0103120	Vitamin K	CoEnzyme and vitamins	CoEnzyme and vitamins	C31H46O2	468.383	450.35	7.5725	[M+NH4]+	2.98103	2	0.7981	rp	12001-79-5 | 81818-54-4 | 10485-69-5 | 27696-10-2	5280483	HMDB0015157	-	C02059	B	14705.5	15239.7	21425.4	16882.1	13531.1	9402.12	26498.6	26677.7	26628.6	ko00130,ko01100,ko01240,ko04977
T3_negative	MW0054150	Isotretinoin	CoEnzyme and vitamins	CoEnzyme and vitamins	C20H28O2	299.204	300.209	7.521	[M-H]-	6.96883	1	0.7537	rp	4759-48-2	5282379	HMDB0006219	-	C07058	A	2064.33	1872.16	602.392	1196.36	870.479	1312.81	1923.84	1844.57	1920.13	-
T3_negative	MW0103528	Dephospho-CoA	CoEnzyme and vitamins	CoEnzyme and vitamins	C21H35N7O13P2S	686.142	687.149	2.4135	[M-H]-	1.19509	3	0.9372	rp	3633-59-8	439335	HMDB0001373	-	-	A	1941.8	3917.8	4906.35	4285.68	2893.51	6774.08	4587	4540.92	4585.44	-
T3_negative	MW0146999	Calcium pantothenate	CoEnzyme and vitamins	CoEnzyme and vitamins	C18H32CaN2O10	437.214	476.168	2.3485	[M-H]-	8.82867	1	0.928	rp	137-08-6	443753	-	-	-	A	9682.72	8323.35	9850.54	10332.4	11018.2	11246.1	9669.91	9669.92	9675.8	-
HILIC_negative	MEDP0143	Biotin	CoEnzyme and vitamins	CoEnzyme and vitamins	C10H16N2O3S	244.092	244.088	2.0581	[M-]-	7.68776	1	0.8084	hilic	58-85-5	171548	HMDB0000030	243	C00120	B	92609.1	84131.1	85904.4	72984.8	72726.6	79866.7	80134.5	80633	79925.8	ko00780,ko01100,ko01240,ko02010,ko04977
HILIC_negative	MEDP1010	NADP+	CoEnzyme and vitamins	CoEnzyme and vitamins	C21H28N7O17P3	742.069	743.076	5.2442	[M-H]-	3.30686	1	0.8827	hilic	53-59-8	5885	HMDB0000217	-	C00006	A	3592.46	3161.59	3146.87	3592.91	2910.94	3136.62	3206.1	3141.72	3135.99	ko00480,ko00760,ko00983,ko01100,ko01240,ko04918,ko04925,ko04936,ko05208,ko05415
HILIC_negative	Hmfn000531	Ascorbic acid	CoEnzyme and vitamins	CoEnzyme and vitamins	C6H8O6	157.012	176.032	1.6779	[M-H2O-H]-	4.85539	1	0.7214	hilic	50-81-7	54670067	HMDB0000044	249	C00072	B	753.383	319.405	928.241	1362.12	1562.4	1959.25	906.634	1109.79	1405.12	ko00053,ko00480,ko01100,ko01240,ko04066,ko04977
HILIC_negative	MEDN0445	Orotidine	CoEnzyme and vitamins	CoEnzyme and vitamins	C10H12N2O8	287.052	288.059	2.4953	[M-H]-	1.41789	1	0.8961	hilic	314-50-1	92751	HMDB0000788	5754	C01103	A	4711.18	4700.49	4770.43	4295.58	3997.89	4310.2	4559.2	4515.67	4505.23	ko00240,ko01100,ko01240
HILIC_negative	MEDP1292	3'-Dephosphocoenzyme A	CoEnzyme and vitamins	CoEnzyme and vitamins	C21H35N7O13P2S	686.141	687.6	3.0206	[M-H]-	4.43115	1	0.9133	hilic	-	642	-	-	-	A	5384.23	2315.87	2907.77	1792.93	1728.05	2996.73	2765.68	2712.4	2621.5	-
T3_positive	MW0055412	N-Stearoyl Taurine	FA	FFA	C20H41NO4S	392.283	391.276	8.3758	[M+H]+	1.7527	2	0.8189	rp	63155-80-6	168274	HMDB0240595	-	-	A	67169.6	38275.4	57337.3	40771.2	16464.3	4141.15	19106.4	16691	17070.5	-
T3_positive	MEDP0513	Palmitic amide	FA	Others	C16H33NO	256.26	255.256	8.0645	[M+H]+	5.95262	1	0.929	rp	629-54-9	69421	HMDB0012273	-	-	A	18120.5	25458.5	16407.3	10315.9	11998	3812.77	12310.5	11656.7	11764.7	-
T3_positive	MW0012560	16-Hydroxyhexadecanoic acid	FA	FFA	C16H32O3	255.24	272.235	7.1531	[M+H-H2O]+	19.7823	1	0.7622	rp	506-13-8	10466	HMDB0006294	-	C18218	A	5747.29	7117.51	6696.03	3613.84	4351.95	3111.89	3099.71	3265.51	3049.29	ko01100
T3_positive	MEDP0510	Carnitine C2:0	FA	CAR	C9H17NO4	204.12	203.116	1.2119	[M+H]+	8.36148	1	0.8191	rp	4398-79-2	1	HMDB0000201	-	C02571	A	11958.5	11952.9	11993.2	13505.2	15960.6	11480.3	12550.6	12623.3	12537	ko04931
T3_positive	MEDP1390	Carnitine C18:1	FA	CAR	C25H47NO4	426.353	425.351	6.6936	[M+]+	13.5962	1	0.7543	rp	38677-66-6	46907933	HMDB0005065	-	-	A	96456.9	130150	99360.4	201859	230633	175291	175216	175227	175935	-
T3_positive	MEDP1391	Carnitine C18:2	FA	CAR	C25H45NO4	424.337	423.335	6.6105	[M+]+	14.1348	1	0.701	rp	36816-10-1	6450015	HMDB0006469	-	-	A	8834.55	4060.78	3025.6	6588.77	7120.28	6726.17	6846.96	6894.35	6959.24	-
T3_positive	MEDP1440	Carnitine C5:0	FA	CAR	C12H23NO4	246.167	245.163	2.775	[M+]+	3.14638	1	0.8513	rp	31023-24-2	-	HMDB0000688	-	-	A	73280.6	56954	61382.4	40479.6	49051.3	68492.1	59256	59194.4	59325.4	-
T3_positive	MW0052452	Docosanamide	FA	Others	C22H45NO	340.353	339.35	7.4683	[M+H]+	11.976	2	0.8747	rp	3061-75-4	76468	HMDB0000583	5565	-	A	58770.3	30350.9	39297.1	21788.6	21015.3	18125.7	12020.5	12321.9	13087.2	-
T3_positive	MW0194064	Acetyl-L-carnitine	FA	CAR	C9H17NO4	204.121	203.116	0.8612	[M+H]+	3.70864	1	0.9813	rp	3040-38-8 | 14992-62-2	7045767	HMDB0000201	956	C02571	A	95197.8	96702.7	92344.5	112009	129269	88636.5	96771.5	97952.4	97465.7	ko04931
T3_positive	MW0055459	Oleamide	FA	FFA	C18H35NO	282.276	281.272	8.2029	[M+H]+	6.69821	1	0.8752	rp	301-02-0	5283387	HMDB0002117	-	C19670	A	74826.1	119688	40891.8	28371.4	52447.5	8725.99	78563.4	77125.7	74371.6	-
T3_positive	MW0169592	Oleoyl oxazolopyridine	FA	FFA	C24H36N2O2	385.287	384.278	7.8761	[M+H]+	8.11638	2	0.9377	rp	288862-58-8	9821458	-	63080	-	A	16141.8	18866	16630	9747.85	9517.88	6607.2	7453.51	7207.43	7575.68	-
T3_positive	MW0015404	9,10-DHOME	FA	Oxidized lipids	C18H34O4	337.231	314.246	6.8366	[M+Na]+	7.59708	2	0.8809	rp	263399-34-4	9966640	HMDB0004704	35697	-	A	39754	42382.9	54139.5	25638.1	36211.7	32774.3	24400	24870.3	24500.1	-
T3_positive	MW0063662	Stearoylcarnitine	FA	CAR	C25H49NO4	428.368	427.366	6.9245	[M+H]+	11.671	2	0.9512	rp	25597-09-5	52922056	HMDB0000848	5811	-	A	123965	122452	91756	84117.9	102001	247526	136239	136086	135281	-
T3_positive	MW0055186	Tetradecanoylcarnitine	FA	CAR	C21H41NO4	372.32	371.304	6.532	[M+H]+	4.46592	2	0.801	rp	25597-07-3	53477791	HMDB0005066	-	-	A	1944.88	1565.82	2608.83	1241.35	4610.09	5261.92	3079.73	3102.47	3327.44	-
T3_positive	MW0054414	L-Palmitoylcarnitine	FA	CAR	C23H45NO4	400.338	399.335	6.6195	[M+H]+	14.0207	2	0.9347	rp	2364-67-2	11953816	HMDB0000222	5231	C02990	A	216651	121785	95687.3	173256	214036	251151	196693	196501	196443	ko00071,ko01212
T3_positive	MW0055500	Levocarnitine propionate	FA	CAR	C10H19NO4	218.136	217.131	0.8676	[M+H]+	6.62773	2	0.906	rp	20064-19-1	188824	HMDB0000824	-	C03017	A	21616.3	26537.3	24575.7	26899.7	43843.9	21223.5	28165.9	28230.4	28152.9	-
T3_positive	MEDP1656	Carnitine C16-OH	FA	CAR	C23H45NO5	416.333	415.33	6.2994	[M+H]+	8.80944	1	0.9219	rp	195207-76-2	71464553	HMDB0013336	-	-	A	2778.7	14752.8	10856.9	13775.1	3351.54	27052.3	18766.5	18801.5	18733.9	-
T3_positive	MEDP1665	Carnitine C3:0	FA	CAR	C10H19NO4	218.136	217.131	1.559	[M+H]+	4.03818	1	0.9355	rp	17298-37-2	107738	HMDB0062514	-	C03017	A	26689.9	32595.3	29898.9	44986.4	48071.8	24272.2	35388.5	35644.1	35353.2	-
T3_positive	MW0169676	Pinolenic acid	FA	Others	C18H30O2	296.255	278.225	7.0808	[M+NH4]+	6.79878	1	0.8374	rp	16833-54-8	5312495	-	35008	-	A	24770.2	30577.6	18947.7	8460.28	20578.6	11569.4	19556.6	19803.4	19330.4	-
T3_positive	MW0055326	N-methyl arachidonoyl amine	FA	Others	C21H35NO	318.276	317.272	5.6011	[M+H]+	3.06922	2	0.7721	rp	156910-29-1	5283392	-	36679	-	A	1327.63	1387.15	1110.04	5662.16	4349.14	903.24	4868.7	3578.18	4809.15	-
T3_positive	MW0193994	Carnitine C4:0	FA	CAR	C11H21NO4	232.151	231.147	2.2493	[M+]+	6.49395	1	0.9412	rp	1492-26-8	439829	HMDB0002013	-	C02862	A	24171.6	23016.3	23870.9	22744.6	28211.5	24696.9	25075.1	25030.7	25003.8	-
T3_positive	MEDP2143	N,N-Bis(2-hydroxyethyl)dodecanamide	FA	Others	C16H33NO3	288.25	287.246	6.7001	[M+H]+	8.02641	1	0.9015	rp	120-40-1	8430	HMDB0032358	-	C06179	A	5930.4	11666.2	5867.15	3757.28	5698.84	5828.26	5883.49	5815.28	5811.66	ko01100
T3_positive	MW0063484	Sebacic acid	FA	FFA	C10H18O4	185.112	202.12	4.4041	[M+H-H2O]+	11.6457	1	0.7159	rp	111-20-6	5192	HMDB0000792	4240	C08277	A	4271.58	4036.63	5626.06	3784.44	3873.39	4156.42	6659.8	6660.39	6693.81	-
T3_positive	MW0012230	12-Hydroxystearic acid	FA	FFA	C18H36O3	283.26	300.266	6.5223	[M+H-H2O]+	9.48423	1	0.7239	rp	106-14-9	7789	HMDB0061706	-	-	A	305303	295770	209635	251161	94166	249961	166991	182250	179001	-
T3_positive	MW0016403	Carnitine C5:1	FA	CAR	C12H21NO4	244.151	243.147	2.6328	[M+]+	10.7301	1	0.882	rp	-	22833596	HMDB0002366	-	-	A	9997.66	8740.66	9290.17	2000.01	2685.31	3459.22	6758.69	6694.7	6671.43	-
T3_positive	MEDP1385	Carnitine C17:1:DC	FA	CAR	C24H43NO6	442.347	441.309	6.4191	[M+]+	6.88681	1	0.7662	rp	-	-	-	-	-	A	47107.3	21322.5	25848.7	29652.1	29773.7	40758.7	36645	36938.2	36944.8	-
T3_positive	MEDTP01664	Carnitine C14:0	FA	CAR	C21H41NO4	372.308	371.304	6.3198	[M+]+	12.4185	1	0.7505	rp	-	-	-	-	-	A	10750	6714.57	7790.72	8476.4	10616.4	11408.2	11346	11749.3	11775.9	-
T3_positive	MEDP1380	Carnitine C20:1	FA	CAR	C27H51NO4	454.383	453.382	6.9957	[M+]+	12.7734	1	0.7402	rp	-	71464507	-	-	-	A	48831.7	33244.3	27652.3	33044.7	35313	50262.4	33856	34128.4	33845.9	-
T3_positive	MEDP1371	Carnitine C23:5	FA	CAR	C30H49NO4	488.357	487.366	8.1251	[M+]+	24.2473	1	0.726	rp	-	-	-	-	-	A	15428.5	6016.43	15510.3	8365.62	11364.1	4218.99	6415.05	5562.41	6261.36	-
T3_positive	MW0154729	Oleoyl Ethanolamide-d4	FA	FFA	C20H35D4NO2	330.334	329.323	6.4029	[M+H]+	10.1118	2	0.8292	rp	-	312636340	-	96544	-	A	2.18827e+06	1.90572e+06	2.24524e+06	1.09071e+06	1.64169e+06	2.16155e+06	1.88547e+06	1.88934e+06	1.88401e+06	-
T3_positive	MW0012052	5,8,14-Eicosatrienoic acid, 11,12-dihydroxy-, (5Z,8Z,14Z)-	FA	Oxidized lipids	C20H34O4	339.245	338.246	6.819	[M+H]+	17.4199	2	0.7797	rp	-	11121316	HMDB0002314	-	-	A	9962.33	3085.68	8642.47	2710.41	6582.91	4831.82	3556.05	3826.57	3830.28	-
T3_positive	MW0011672	Thromboxane B2-d4	FA	Oxidized lipids	C20H34O6	357.256	370.236	5.4365	[M+H-H2O]+	2.98512	2	0.7777	rp	-	16061116	-	36264	-	A	2129.31	2405.19	2371	1618.64	2163.09	1716.1	1696.71	1612.69	1582.85	-
T3_positive	MW0015472	9-nitro-9E-octadecenoic acid	FA	Oxidized lipids	C18H33NO4	292.232	327.241	6.2411	[M+H-2H2O]+	13.0616	2	0.7639	rp	-	11645581	HMDB0062738	-	-	A	632485	554538	596716	432446	525116	547584	593203	585985	581144	-
T3_positive	MW0016016	(2S,4S)-1-Acetoxy-16-heptadecene-2,4-diol	FA	Others	C19H36O4	329.277	328.261	6.7485	[M+H]+	21.9594	2	0.7516	rp	-	25107527	HMDB0031043	-	-	B	12683	22867.1	9522.59	9402.31	11670.6	12320.8	11412.4	11413.4	11046.7	-
T3_positive	MW0012369	14Z,17Z,20Z,23Z,26Z,29Z-dotriacontahexaenoic acid	FA	Oxidized lipids	C32H52O2	468.395	468.397	6.6936	[M+]+	2.05967	2	0.7338	rp	-	52921816	-	74377	-	A	17796.1	10588.9	922.149	5288.2	13414.5	13408	12679.1	12501.1	12510.7	-
T3_positive	MW0144105	9,10-DiHOME-d4	FA	Others	C18H30D4O4	319.28	318.271	7.869	[M+H]+	5.456	4	0.8806	rp	-	126456327	-	96456	-	A	12870.4	16913.6	18233.9	9169.1	11317.5	6675.16	8254.39	8043.18	7415.29	-
T3_negative	MEDP0634	FFA(20:1)	FA	FFA	C20H38O2	309.281	310.287	8.203	[M-H]-	1.01276	1	0.9542	rp	93772-82-8	46234793	-	-	-	A	24225.6	16470.2	12702.4	22165.2	23005.3	26133.7	10920	13373.6	12222.2	-
T3_negative	MW0054385	Lipoxin A4	FA	Oxidized lipids	C20H32O5	387.198	352.225	6.3376	[M+Cl]-	6.87348	2	0.7109	rp	89663-86-5	5280914	HMDB0004385	7058	C06314	A	22370.2	39462.2	46901.5	36388	36748.7	41016.9	23274.5	25896.3	18249.2	ko00590,ko01100,ko04080,ko05145
T3_negative	MW0054376	Linoleic Acid-d4	FA	FFA	C18H32O2	283.262	280.24	6.2487	[M-H]-	4.12878	2	0.8424	rp	79050-23-0	12311285	-	96528	-	A	35148.5	31770.5	72925	6834.96	69003.3	67674.5	17022.3	23740.9	24769.3	-
T3_negative	MW0015446	9E-heptadecenoic acid	FA	Oxidized lipids	C17H32O2	267.234	268.24	8.3893	[M-H]-	3.22076	3	0.877	rp	76261-97-7	5312440	HMDB0031046	-	C16536	A	2281.07	2010.35	4898.86	4472.34	1094.76	1790.67	3115.14	2933.97	2748.6	-
T3_negative	MEDN1433	6-trans-12-epi Leukotriene B4	FA	Oxidized lipids	C20H32O4	395.244	336.23	6.4604	[M+CH3COO]-	1.76345	1	0.8022	rp	71548-19-1	5283129	HMDB0005088	-	-	A	9213.55	89676.1	12357.4	7142.02	75244	7056.21	70351.9	69664.9	70330	-
T3_negative	MEDN0785	LTB4	FA	Oxidized lipids	C20H32O4	395.22	336.23	6.3376	[M+CH3COO]-	11.604	1	0.7215	rp	71160-24-2	5280492	HMDB0001085	-	C02165	A	3337.41	3099.89	3534.14	2184.61	3305.94	2842.34	2056.11	2267.71	2240.46	ko00590,ko01100,ko03320,ko04080,ko04726,ko04750,ko04976
T3_negative	MEDN0311	Dodecanedioic Acid	FA	FFA	C12H22O4	229.145	230.152	5.6928	[M-H]-	2.5451	1	0.9521	rp	693-23-2	12736	HMDB0000623	5596	C02678	A	8864.68	7553.59	8310.63	7419.16	7607.77	8181.66	7790.04	7791.19	7689.49	-
T3_negative	MW0102911	Traumatic acid	FA	FFA	C12H20O4	227.13	228.136	6.1102	[M-H]-	6.17538	1	0.8779	rp	6402-36-4	5283028	HMDB0000933	5882	C16308	A	30469.1	33798.9	31946.9	16635.5	25443.3	19861.6	40475.7	40628.2	40464.3	ko00592
T3_negative	MEDN0383	FFA(18:2)	FA	FFA	C18H32O2	279.234	280.24	8.168	[M-H]-	5.1975	1	0.9506	rp	60-33-3	5280450	HMDB0000673	191	C01595	A	13210.4	12745.9	11601.4	11459.3	12123.8	14257.6	12387.1	12182.8	12169.5	ko00591,ko01040,ko01100
T3_negative	MW0052509	Eicosadienoic acid	FA	FFA	C20H36O2	307.265	308.272	7.0102	[M-H]-	6.09626	1	0.8671	rp	5598-38-9	6439848	HMDB0005060	-	C16525	A	27666.1	22804.8	19394.8	18082.3	19746.6	18837.6	13108.2	14174.3	13924.9	ko01040
T3_negative	MW0103061	FAA(18:1)	FA	FFA	C18H34O2	281.251	282.256	6.4604	[M-H]-	6.36204	1	0.952	rp	506-17-2	5282761	HMDB0240219	-	C21944	A	7.91776e+06	7.02604e+06	7.54561e+06	5.84192e+06	6.65135e+06	7.59633e+06	4.72582e+06	5.30684e+06	5.14537e+06	-
T3_negative	MEDN0658	Hexadecanedioic acid	FA	FFA	C16H30O4	285.207	286.214	6.4254	[M-H]-	0.0418465	1	0.8067	rp	505-54-4	10459	HMDB0000672	5642	C19615	A	4728.35	4438.94	4906.8	3788.63	4371.15	3619.14	4406.17	4414.71	4414.65	ko01100
T3_negative	MW0011832	1,11-Undecanedicarboxylic acid	FA	FFA	C13H24O4	243.161	244.167	6.0754	[M-H]-	2.52361	1	0.9318	rp	505-52-2	10458	HMDB0002327	6622	-	A	17115.7	15234.5	14724.6	14163.6	14694.2	16560.7	15080.9	15148.3	15021.5	-
T3_negative	MW0106158	cis-3-Hexenyl acetate	FA	FFA	C8H14O2	141.093	142.099	5.8614	[M-H]-	1.63086	1	0.9614	rp	3681-71-8	5363388	HMDB0040215	-	C19757	A	4002.6	3582.06	5017.06	2719.17	2966.4	2767.08	4257.28	4230.25	4208.9	ko00592
T3_negative	MW0012191	12,13-DiHOME	FA	Oxidized lipids	C18H34O4	313.239	314.246	6.8198	[M-H]-	4.31535	1	0.9089	rp	263399-35-5	10236635	HMDB0004705	-	-	A	38504.4	37535.8	40801.6	33955.1	36037.5	38426	36297.7	36346.4	36998.6	-
T3_negative	MW0054695	5,8,11-Eicosatrienoic acid	FA	FFA	C20H34O2	305.25	306.256	8.3723	[M-H]-	3.32154	1	0.8708	rp	20590-32-3	5312531	HMDB0010378	-	C21938	A	11384.6	4641.45	10245.1	6594.58	1679.09	7316.08	5562.47	5676.07	5047.83	-
T3_negative	MEDN0685	Undecanedioic acid	FA	FFA	C11H20O4	215.13	216.136	5.2756	[M-H]-	2.7043	1	0.941	rp	1852-04-6	15816	HMDB0000888	5846	-	A	14339.8	11517.2	11806.4	10914.4	11807	14506.8	12284.7	12390.3	12247.3	-
T3_negative	MEDL01999	Floionolic acid	FA	FFA	C18H36O5	331.25	332.256	6.2372	[M-H]-	8.69738	1	0.7159	rp	17705-68-9	5282938	HMDB0034295	-	C19621	A	13529.4	12342.8	12783.1	10789.9	11226.8	11571.6	12490	12456.9	12513.2	-
T3_negative	MW0012414	propan-2-yl (Z)-7-[(1R,2R,3R,5S)-3,5-dihydroxy-2-[(3S)-3-hydroxy-5-phenylpentyl]cyclopentyl]hept-5-enoate	FA	Oxidized lipids	C26H40O5	431.288	432.288	6.8229	[M-H]-	3.40524	2	0.8225	rp	145773-22-4	10477939	-	45714	-	A	24181.3	27644.9	36861.5	17703.1	26304.9	23010	22474	22713.7	22060.3	-
T3_negative	MW0054288	Dodecanoic acid	FA	FFA	C12H24O2	199.171	200.178	7.3678	[M-H]-	2.675	3	0.7872	rp	143-07-7	3893	HMDB0000638	5611	C02679	A	8101.38	8952.09	4684.82	5313.39	6047.11	5008.27	6004.17	5939.76	5927.79	ko00061,ko01100
T3_negative	MW0056747	Palmitoyl Serinol	FA	Others	C19H39NO3	328.281	329.293	6.6436	[M-H]-	8.61366	2	0.7964	rp	126127-31-9	9862307	HMDB0013654	-	-	A	7469.19	6731.96	7385.73	6812.43	7377.7	7901.98	7940.33	7881.37	8018.75	-
T3_negative	MW0054292	Lauroyl diethanolamide	FA	Others	C16H33NO3	286.24	287.246	6.0547	[M-H]-	1.4839	3	0.7634	rp	120-40-1	8430	HMDB0032358	-	C06179	A	1079.2	2030.91	1592.55	701.715	1730.74	1964.2	1549.07	1528.67	1549.6	ko01100
T3_negative	MW0141236	10-Propoxydecanoic acid	FA	Oxidized lipids	C13H26O3	229.182	230.188	6.2674	[M-H]-	5.40904	2	0.9075	rp	119290-12-9 | 119290-00-5	122098	-	62969	-	A	3926.8	3284.99	3757.09	2795.52	3696.91	3498.05	3338.18	3404.52	3332.34	-
T3_negative	MEDN0387	FFA(11:0)	FA	FFA	C11H22O2	185.156	186.162	7.0613	[M-H]-	2.8	3	0.7074	rp	112-37-8	8180	HMDB0000947	5894	C17715	A	782.344	3464.35	898.723	677.074	932.74	1543.78	2028.31	1943.67	1922.75	-
T3_negative	MW0102906	cis,cis-Muconic acid	FA	FFA	C6H6O4	141.018	142.027	1.9635	[M-H]-	7.81246	1	0.9244	rp	1119-72-8	5280518	HMDB0006331	-	C02480	A	219212	706728	79266.2	170317	540751	576834	101030	111086	63611.8	ko01100
T3_negative	MW0012179	12-Hydroxyeicosapentaenoic acid, (12R)-	FA	Oxidized lipids	C20H30O3	377.236	318.219	6.4604	[M+CH3COO]-	8.5789	2	0.7263	rp	109430-12-8	5283190	-	36343	-	A	100263	45931	120778	33628.7	91057	100295	53307.8	66234.1	66083	-
T3_negative	MW0052792	Stearic acid	FA	FFA	C18H36O2	567.539	284.272	8.0658	[2M-H]-	3.32516	1	0.9487	rp	-	5281	HMDB0000827	189	C01530	A	3090.59	3335.37	1291.43	3937.16	3476.85	6470.3	3625.61	3531.49	3619.97	ko00061,ko01040,ko01100
T3_negative	MW0104208	10-Hydroxydecanoic acid	FA	FFA	C10H20O3	187.135	188.141	4.9523	[M-H]-	4.57321	2	0.9157	rp	-	74300	HMDB0244272	-	C02774	A	19031.3	18082.5	16697	15231	16865.3	16543.7	17686	17673.1	17617.5	-
T3_negative	MW0148655	Docosanedioic acid	FA	FFA	C22H42O4	415.308	370.308	8.219	[M+HCOO]-	0.951683	3	0.7048	rp	-	244872	HMDB0242127	-	C19625	A	3881.43	1559.31	2116.17	1664.99	2753.59	2690.43	2716.5	2873.55	2766.06	-
T3_negative	MW0145221	Arachidonic acid-biotin	FA	Others	C30H48N2O5S	547.33	548.328	1.5003	[M-H]-	12.0483	4	0.7737	rp	-	146156686	-	45063	-	B	6605.79	18824.6	16193.7	8770.22	25388.9	21497.9	18829.5	18497.2	18433.3	-
T3_negative	MEDP1387	Carnitine C19:2	FA	CAR	C26H47NO4	436.337	437.351	6.9421	[M-H]-	14.8835	4	0.7376	rp	-	-	-	-	-	A	1.07839e+06	977478	1.029e+06	908974	963375	973711	984263	1.00059e+06	1.00139e+06	-
T3_negative	MW0013113	2,3-dinor Thromboxane B1	FA	Others	C18H32O6	343.213	344.22	6.5305	[M-H]-	5.48347	2	0.7175	rp	-	52921884	-	44923	-	A	17616.8	16585.6	17277.3	13577.7	14976.5	14621.6	15467.9	15481.3	15149.5	-
HILIC_negative	MW0056738	FFA(16:1)	FA	FFA	C16H30O2	253.218	254.225	0.8752	[M-H]-	1.33687	1	0.9579	hilic	373-49-9	445638	HMDB0003229	188	C08362	A	36280.3	34244.3	29825.2	27818.1	24804.5	27122.4	25828.4	25822	25602.9	ko00061,ko01100
HILIC_negative	MW0103271	Cis-8,11,14,17-Eicosatetraenoic acid	FA	FFA	C20H32O2	303.234	304.24	0.8572	[M-H]-	2.43701	1	0.957	hilic	2091-26-1	11722594	HMDB0002177	-	-	A	224096	192862	177080	112269	80486	135870	124282	125905	125493	-
HILIC_negative	MEDP0904	FFA(18:1)	FA	FFA	C18H34O2	281.25	282.256	0.8572	[M-H]-	1.61733	1	0.9974	hilic	112-80-1	445639	HMDB0000207	190	C00712	A	410648	326744	366796	322831	320039	344772	299366	299521	302301	ko00061,ko01040
HILIC_negative	MEDN0381	FFA(16:0)	FA	FFA	C16H32O2	255.234	256.24	0.8378	[M-H]-	1.09178	1	0.9977	hilic	-	985	HMDB0000220	187	C00249	A	261207	263399	248262	236019	259436	273681	238020	239111	239770	ko00061,ko00062,ko00071,ko01040,ko01100,ko01212
HILIC_negative	MEDN0391	3-Deoxy-D-Lyxo-Heptopyran-2-ularic Acid	FA	FFA	C7H10O8	327.234	222.038	0.8378	[M-H]-	0.976648	1	0.7937	hilic	-	15608515	HMDB0002183	-	C21044	A	104117	150137	160850	165759	135313	92957.1	114383	116275	84189.5	-
HILIC_negative	MEDP1398	Carnitine C16:1	FA	CAR	C23H43NO4	396.314	397.319	1.0966	[M-H]-	2.9104	3	0.8608	hilic	-	53477817	HMDB0006317	-	-	A	19211.9	18731.6	18584.6	14160.2	14026.3	18629.8	15343.4	14734.1	14674.6	-
HILIC_negative	ZINC44387293	N-(eicosanoyl)-tetradecasphing-4-enine	FA	Others	C34H67NO3	536.505	537.512	0.8006	[M-H]-	0.177112	4	0.9956	hilic	-	11092732	-	-	-	A	52956.9	50500.7	37042.7	55270.9	39527.7	69086.7	38862	39284	39507.2	-
HILIC_negative	ZINC44405906	N-(octadecanoyl)-tetradecasphing-4-enine	FA	Others	C32H63NO3	544.45	509.481	0.8078	[M+Cl]-	1.56061	4	0.9625	hilic	-	21629598	-	-	-	A	6273.47	5354.47	4982.26	5234.23	5641	7316.93	4779.78	4660.07	4771.08	-
HILIC_negative	ZINC44404339	N-(docosanoyl)-4E,6E-tetradecasphingadienine	FA	Others	C36H69NO3	562.521	563.528	0.8006	[M-H]-	1.32256	4	0.718	hilic	-	10482997	-	-	-	A	8318.21	7484.72	6226.46	9969.54	6836.83	11475.5	4740.08	5078.49	4963.44	-
T3_positive	MEDL02655	Albanol B	Flavonoids	Flavonoid	C34H22O8	559.124	558.131	6.7838	[M+H]+	21.6309	1	0.8308	rp	87084-99-9	480819	HMDB0030109	-	-	B	1922.33	7010.37	3613.84	499.236	5395.18	3787.72	5163.92	5710.65	5340.99	-
T3_positive	MW0139791	Tectoridin	Flavonoids	Flavonoid	C22H22O11	485.107	462.116	7.7547	[M+Na]+	3.62726	2	0.8975	rp	611-40-5	5281810	-	-	-	B	1202.87	2915.43	1309.72	491.041	1268.12	1186.95	8928.27	8761.53	8932.44	-
T3_positive	MW0137405	Aromadendrin	Flavonoids	Flavonoid	C15H12O6	311.051	288.063	4.3088	[M+Na]+	3.475	3	0.753	rp	480-20-6	122850	HMDB0030847	-	C00974	B	1376.8	1283.54	1294.23	1184.44	1459.02	1633.93	1854.95	1860.05	1873.15	ko01100
T3_positive	MW0137818	Cyanidin 3-O-sophoroside	Flavonoids	Anthocyanidins	C27H31O16+	611.16	611.161	7.8801	[M+]+	1.60206	2	0.7466	rp	38820-68-7	11169452	-	-	-	B	93398.2	9402.68	17088.5	55120.7	2595.35	3011.2	37258.8	35458.6	36436	-
T3_positive	MW0138832	7-O-Methylluteolin	Flavonoids	Flavonoid	C16H12O6	301.072	300.063	6.0734	[M+H]+	3.26764	1	0.8221	rp	20243-59-8	5318214	HMDB0037339	-	-	B	35337.6	31363.8	37129.5	31133.2	33388.1	33451.3	32552	32822	32560.2	-
T3_positive	MW0139310	Petunidin 3-(6''-acetylglucoside)	Flavonoids	Anthocyanidins	C24H25O13+	538.157	521.13	8.2029	[M+NH4]+	2.50538	2	0.7352	rp	-	44256961	-	47123	-	B	1.02753e+06	165033	214709	10475	11817.4	2654.03	7463.6	7604.41	7632.77	-
T3_positive	MW0138796	Limocitrol 3-glucoside	Flavonoids	Flavonoid	C24H26O14	556.167	538.132	6.8102	[M+NH4]+	1.38312	4	0.9666	rp	-	44260059	HMDB0037690	-	-	B	3504.08	6016.12	3871.68	595.364	6467.21	2678.63	5149.57	5509.49	5425.62	-
T3_positive	MW0138837	luteolin-7-O-[beta-D-glucuronosyl-(1->2)-beta-D-glucuronide]	Flavonoids	Flavonoid	C27H26O18	661.091	638.112	0.6787	[M+Na]+	13.97	4	0.7487	rp	-	5282153	HMDB0060297	-	C12632	B	5773.25	7748.7	7925.41	5868.91	8972.25	8321.54	7633.8	7634.57	7674.56	-
T3_negative	MW0139261	Pectolinarigenin	Flavonoids	Flavonoid	C17H14O6	314.08	314.079	6.891	[M-]-	3.00443	1	0.7436	rp	520-12-7	5320438	HMDB0128589	-	C17784	B	938.459	2534.94	2444.55	2274.78	2135.94	2093.94	10623	10767.8	10645.9	-
T3_negative	MW0169433	Luteolin	Flavonoids	Flavonoid	C15H10O6	285.034	286.048	5.015	[M-H]-	14.8066	1	0.7562	rp	491-70-3	5280445	HMDB0005800	-	C01514	B	11950.1	9571.13	10467.2	11264.8	2833.98	11041.3	10875.1	10954.2	10832	ko01100
T3_negative	MW0124161	Formononetin	Flavonoids	Isoflavones	C16H12O4	267.063	268.074	6.4684	[M-H]-	16.2063	1	0.7435	rp	485-72-3	5280378	HMDB0005808	-	C00858	B	3408.68	1391.56	11163.4	2525.12	2982.51	3353.1	2918.1	2899.94	2928.49	ko01100
T3_negative	MW0131472	3-O-Methylquercetin	Flavonoids	Flavonoid	C16H12O7	351.034	316.058	4.7719	[M+Cl]-	7.05014	2	0.7714	rp	1486-70-0	5280681	-	51143	C04443	B	15582.4	18289.6	19710	18443.8	19783.5	20553.1	17855	17847.1	17769.6	-
T3_negative	MW0193234	Phloretin-4'-O-(6''-Salicyloyl)glucoside	Flavonoids	Chalcones	C28H28O12	555.153	556.158	2.0932	[M-H]-	1.9356	4	0.9539	rp	-	-	-	-	-	B	9798.25	11232.8	12390.2	11311.1	13590.3	12042.9	11699.8	11781.9	11687.7	-
T3_negative	MW0139940	Vitexin 6''-(3-hydroxy-3-methylglutarate)	Flavonoids	Flavonoid	C27H28O14	575.142	576.148	2.0932	[M-H]-	5.04352	4	0.8886	rp	-	44257690	HMDB0041199	-	-	B	7079.59	8446.25	8902.41	8393.98	8227.45	5497.84	8476.48	8478.97	8384.84	-
HILIC_negative	MW0148931	ent-Fisetinidol-(4beta->8)-catechin-(6->4beta)-ent-fisetinidol	Flavonoids	Flavonoid	C45H38O16	869.187	834.216	0.7819	[M+Cl]-	8.37368	4	0.829	hilic	88269-47-0	442680	-	-	C10225	B	237.118	448.373	1786.22	361.113	1920.95	1369.18	4667.92	4738.2	4671.9	-
HILIC_negative	MEDL02569	Euxanthone	Flavonoids	Xanthone	C13H8O4	263.009	228.042	1.6498	[M+Cl]-	11.0556	1	0.7574	hilic	529-61-3	5281631	HMDB0030724	-	C10061	B	8045.74	7375.32	6951.51	4339.88	4012.59	8191.61	6369.6	6544.34	6346.87	-
HILIC_negative	MW0169017	Daidzein	Flavonoids	Isoflavones	C15H10O4	313.079	254.058	0.7893	[M+CH3COO]-	22.3876	1	0.8547	hilic	486-66-8	5281708	HMDB0003312	-	C10208	B	3457.49	8522.93	19236	4806.56	15660.5	13379.2	134080	132978	132946	ko01100
HILIC_negative	MW0139834	Tiliroside	Flavonoids	Flavonoid	C30H26O13	593.123	594.137	0.7819	[M-H]-	12.8072	2	0.8838	hilic	20316-62-5 | 22153-44-2	5320686	-	-	C17140	B	513.955	1262.8	3263.35	707.521	3130.3	2157.97	15277.9	15316.7	15089.6	-
HILIC_negative	MW0169354	Nicotiflorin	Flavonoids	Flavonoid	C27H30O15	593.161	594.159	0.4541	[M-H]-	22.3357	2	0.8052	hilic	17650-84-9	5318767	HMDB0302426	-	C21833	B	2472.83	2156.03	2956.28	2211.87	2491.73	1328.67	2601.93	2514.66	2493.28	-
HILIC_negative	MW0137859	Daidzein 4'-O-glucuronide	Flavonoids	Isoflavones	C21H18O10	429.08	430.09	0.8572	[M-H]-	6.93383	2	0.7847	hilic	-	23930394	HMDB0041717	-	-	B	74292.9	63832.5	69291.7	60603.1	56496.9	67422.4	56980.7	57009.8	57669.8	-
HILIC_negative	MW0193393	Apigenin-8-C-arabinoside-7-O-(6''-salicyloyl)glucoside	Flavonoids	Flavonoid	C33H32O16	719.151	684.169	0.7856	[M+Cl]-	17.4878	4	0.7086	hilic	-	-	-	-	-	B	142.622	399.912	761.039	236.834	675.996	716.667	3011.32	3067.33	3070.9	-
T3_positive	MW0012936	1-Oleoyl-2-acetyl-sn-glycerol	GL	DG	C23H42O5	399.303	398.303	8.1239	[M+H]+	20.4975	2	0.8119	rp	86390-77-4 | 92282-11-6	6437055	-	424	C00641	A	13516.5	16091.3	13706.4	8661.87	8149.11	5838.31	7067.72	6824.74	6567.65	ko00561,ko00562,ko00564,ko01100,ko04070,ko04730
T3_positive	MW0150562	Glycidyl stearate	GL	MG	C21H40O3	341.301	340.298	6.9245	[M+H]+	9.75471	3	0.7356	rp	7460-84-6	62642	-	-	C19427	A	126887	113967	86606.7	94885.8	54221.3	74015	97023	97131.6	94013.3	-
T3_positive	MEDP1230	Glycidyl oleate	GL	MG	C21H38O3	338.285	338.282	7.2494	[M+]+	11.283	1	0.7188	rp	5431-33-4	5354568	-	-	C19426	A	3282.74	3130.49	3662.42	1134.92	2847.27	756.825	2578.45	2405.02	2551.81	-
T3_positive	MEDP1122	MG(16:0/0:0/0:0)	GL	DG	C19H38O4	348.307	330.277	8.2721	[M+NH4]+	7.35892	1	0.8919	rp	32899-41-5	3084463	HMDB0011564	-	C00641	A	4500.62	4158.02	4055.85	1941.22	2285.66	871.937	1742.76	1777.92	1592.39	ko00561,ko00562,ko00564,ko01100,ko04070,ko04730
T3_positive	MW0055024	MG(18:2/0:0/0:0)	GL	MG	C21H38O4	355.269	354.277	8.2721	[M+H]+	19.475	2	0.771	rp	26545-74-4	5283469	HMDB0242115	-	C01885	A	5195.97	5815.06	5670.79	1420.54	1285.7	762.609	1079.94	1203.67	1075.94	ko00561,ko01100,ko04714,ko04923,ko04975,ko04977
T3_positive	MEDP1448	MG(18:0/0:0/0:0)	GL	MG	C21H42O4	359.311	358.308	7.3111	[M+H]+	9.83733	1	0.8875	rp	22610-61-3	15560610	HMDB0011131	-	C01885	A	93690.1	90748.4	84385.5	63356.7	37825.5	40466.6	44722.5	44914.7	43047.9	ko00561,ko01100,ko04714,ko04923,ko04975,ko04977
T3_positive	MW0053741	Glyceryl monostearate	GL	MG	C21H42O4	359.311	358.308	6.9071	[M+H]+	10.7324	2	0.8671	rp	123-94-4 | 31566-31-1 | 22610-63-5 | 83138-62-9 | 85666-92-8 | 342394-34-7	24699	-	-	C01885	A	71689.1	67585.1	50136	55482.3	31632.5	42300.2	57115	57298.6	55210.9	ko00561,ko01100,ko04714,ko04923,ko04975,ko04977
T3_positive	MW0055051	MG(a-17:0/0:0/0:0)[rac]	GL	MG	C20H40O4	345.304	344.293	6.9425	[M+H]+	14.2592	3	0.7582	rp	-	131779638	HMDB0072851	-	C01885	A	7839.09	6978.76	8499.74	4865.98	7283.32	5574.99	5534.55	5527.36	5425.43	ko00561,ko01100,ko04714,ko04923,ko04975,ko04977
T3_positive	MW0167805	[3-[2-(dimethylamino)ethoxy-hydroxyphosphoryl]oxy-2-hexadecanoyloxypropyl] (Z)-octadec-9-enoate	GL	DG	C41H80NO8P	746.561	745.562	7.4916	[M+H]+	4.2328	4	0.9046	rp	-	131821150	HMDB0114041	-	C00641	A	42926.9	22739.5	413.392	36175.4	311073	106080	79882.2	79582.3	76481.7	ko00561,ko00562,ko00564,ko01100,ko04070,ko04730
T3_positive	MW0049375	1,2-Dilauroyl-sn-glycerol	GL	DG	C27H52O5	439.377	456.382	8.1684	[M+H-H2O]+	5.00077	2	0.7298	rp	-	151838	HMDB0093027	-	C00641	A	32522.2	28995	33796	23313.9	22556.4	16471.3	19906.6	19612.6	19656.7	ko00561,ko00562,ko00564,ko01100,ko04070,ko04730
T3_positive	MW0050866	1-Behenoyl-2-oleoyl-sn-glycerol	GL	DG	C43H82O5	763.585	678.616	6.5502	[M+K+HCOOH]+	0.183346	3	0.8691	rp	-	53478366	HMDB0007595	-	C00641	A	3702.72	3591.31	979.701	4526.49	10197.5	10923.2	42115.4	37231.4	43400.3	ko00561,ko00562,ko00564,ko01100,ko04070,ko04730
T3_negative	MW0012978	3-Palmitoyl-sn-glycerol	GL	MG	C19H38O4	365.247	330.277	8.2701	[M+Cl]-	8.82486	2	0.8832	rp	-	14900	HMDB0245964	-	C01885	A	53956.2	52954	50915.8	29634.5	28713.8	38333.2	37457.9	37508.6	36702.3	ko00561,ko01100,ko04714,ko04923,ko04975,ko04977
T3_positive	MW0056789	1-tetradecanoyl-2-(9Z,12Z-octadecadienoyl)-sn-glycero-3-phosphocholine	GP	PC	C40H76NO8P	730.53	729.531	6.9425	[M+H]+	5.28521	4	0.8839	rp	92345-33-0	24778624	HMDB0007874	-	C00157	A	134224	46372.5	121580	77960.4	278501	85291.1	277703	270067	199897	ko00564,ko00590,ko00591,ko00592,ko01100,ko04723,ko05231
T3_positive	MEDN0362	LPE(18:1/0:0)	GP	LPE	C23H46NO7P	480.302	479.301	7.1738	[M+H]+	10.5325	1	0.955	rp	89576-29-4	53480949	HMDB0011506	-	C04438	A	75046.4	57632.9	72955.9	49117.6	54925.5	49634.1	45704.4	46142.5	45606.2	ko00564
T3_positive	MEDP1658	LPC(O-18:1)	GP	LPC-O	C26H54NO6P	508.369	507.369	6.8366	[M+H]+	13.594	1	0.8008	rp	87907-66-2	24779510	-	-	C00157	A	44803.8	30730.4	28036.5	41002.7	22687.3	35415.1	43211.2	44507.8	44644	ko00564,ko00590,ko00591,ko00592,ko01100,ko04723,ko05231
T3_positive	MEDP1904	LPE(18:2/0:0)	GP	PE	C23H44NO7P	478.287	477.286	6.8014	[M+H]+	16.1977	1	0.7969	rp	85046-18-0	52925130	HMDB0011507	-	C00350	A	15453.5	13066.6	15589.1	8808.22	9624.78	12748.3	11086	11186.9	11111.2	ko00563,ko00564,ko01100,ko04136,ko04140,ko04723,ko05167
T3_positive	MW0059063	PE(P-16:0/18:2(9Z,12Z))	GP	PE-P	C39H74NO7P	722.509	699.52	6.9425	[M+Na]+	0.416	4	0.7397	rp	802981-98-2	52925127	HMDB0011343	-	C00350	A	83426	11070.8	89829.4	52555.4	145458	31277.2	21727.1	12665.1	21849.8	ko00563,ko00564,ko01100,ko04136,ko04140,ko04723,ko05167
T3_positive	MW0013619	1-O-Octadecyl-2-O-methyl-sn-glycero-3-phosphocholine	GP	PC	C27H58NO6P	546.393	523.4	7.5552	[M+Na]+	6.20815	2	0.8102	rp	77286-66-9	6918215	-	43416	C00157	A	34156.8	34083.5	34453.9	27263.4	27387.9	23184.5	25226.3	25052.2	24876	ko00564,ko00590,ko00591,ko00592,ko01100,ko04723,ko05231
T3_positive	MEDP1348	LPC(16:1/0:0)	GP	LPC	C24H48NO7P	494.318	493.317	6.7211	[M+]+	9.74209	1	0.8728	rp	76790-27-7	24779461	HMDB0010383	-	C00157	A	114469	91962.8	169865	90735.2	106486	126113	120341	122185	121974	ko00564,ko00590,ko00591,ko00592,ko01100,ko04723,ko05231
T3_positive	MW0054561	LPC(O-18:0/0:0)	GP	LPC-O	C26H56NO6P	510.385	509.385	7.3231	[M+H]+	12.75	1	0.9173	rp	74430-89-0	3985	HMDB0011149	43411	C00157	A	20331.4	21741.5	80450.4	32637.4	42886.7	36452	43836.8	44481.4	43560.4	ko00564,ko00590,ko00591,ko00592,ko01100,ko04723,ko05231
T3_positive	MW0013385	LPC(O-16:0/2:0)	GP	LPC	C26H54NO7P	524.365	523.364	6.6758	[M+H]+	9.6216	1	0.8471	rp	74389-68-7	108156	HMDB0062195	-	C00157	A	1.45582e+06	1.34115e+06	847723	617205	501219	1.21173e+06	584498	585523	576404	ko00564,ko00590,ko00591,ko00592,ko01100,ko04723,ko05231
T3_positive	MEDP1333	LPC(0:0/20:4)	GP	LPC	C28H50NO7P	544.332	543.332	6.8366	[M+]+	7.61362	1	0.8956	rp	67341-29-1	52924038	HMDB0061699	-	C00157	A	58261.4	60134.9	71620.7	36990.2	41563.1	46299.8	42819.7	44278.8	44190.5	ko00564,ko00590,ko00591,ko00592,ko01100,ko04723,ko05231
T3_positive	MW0012963	1-Palmitoyl-sn-glycero-3-phosphoethanolamine	GP	PE	C21H44NO7P	495.32	453.286	6.755	[M+CH3CN+H]+	2.34192	3	0.9621	rp	53862-35-4	58177710	HMDB0011503	-	C00350	A	86182.3	33156.7	48313.2	26183.6	28738.7	32087.8	34068.4	34652	34688	ko00563,ko00564,ko01100,ko04136,ko04140,ko04723,ko05167
T3_positive	MW0012825	1-O-Hexadecyl-sn-glycero-3-phosphocholine	GP	PC	C24H52NO6P	482.354	481.353	7.7643	[M+H]+	10.6261	1	0.7412	rp	52691-62-0 | 97288-09-0	162126	-	-	C00157	A	39404.2	2668.86	11806.8	27772.9	70184.3	60681.6	30627.4	28593.7	29284.2	ko00564,ko00590,ko00591,ko00592,ko01100,ko04723,ko05231
T3_positive	MW0141122	Dioleoylphosphatidylcholine	GP	PC	C44H84NO8P	808.573	785.593	6.8256	[M+Na]+	13.3099	4	0.757	rp	52088-89-8	5364680	-	45202	C00157	A	545676	407626	347890	246902	142635	390277	295901	311145	309178	ko00564,ko00590,ko00591,ko00592,ko01100,ko04723,ko05231
T3_positive	MEDP1339	LPC(18:1/0:0)	GP	LPC	C26H52NO7P	522.349	521.356	7.3259	[M+H]+	15.8349	1	0.9102	rp	3542-29-8	53480465	HMDB0010385	-	C00157	A	131912	109407	188965	105577	119201	109852	111246	111185	109380	ko00564,ko00590,ko00591,ko00592,ko01100,ko04723,ko05231
T3_positive	MW0056964	1-Stearoyl-2-arachidonoyl-sn-glycero-3-phosphocholine	GP	PC	C46H84NO8P	810.588	809.593	6.5684	[M+H]+	10.6846	2	0.7467	rp	35418-59-8	16219824	HMDB0008048	-	C00157	A	138213	65490.9	510598	1.36183e+06	379823	263121	201149	193056	190860	ko00564,ko00590,ko00591,ko00592,ko01100,ko04723,ko05231
T3_positive	MEDL00422	PC(18:3/18:3)	GP	PC	C44H76NO8P	795.556	777.531	6.6936	[M+NH4]+	2.96972	1	0.7141	rp	324054-21-9	52922787	HMDB0008172	-	C00157	A	13303.8	10860.8	16802.1	4795.21	17450.5	25818.6	8527.19	9470.65	9281.33	ko00564,ko00590,ko00591,ko00592,ko01100,ko04723,ko05231
T3_positive	MW0013543	1-hexadecanoyl-2-(9Z,12Z-octadecadienoyl)-sn-glycero-3-phosphoethanolamine	GP	PE	C39H74NO8P	715.53	715.515	7.8864	[M+]+	17.8885	2	0.7438	rp	26662-95-3	9546747	HMDB0008928	-	C00350	A	9501.9	10167.3	11439.3	10950.3	11821	10765.9	8084.52	8564.95	8219.66	ko00563,ko00564,ko01100,ko04136,ko04140,ko04723,ko05167
T3_positive	MEDP1180	LPC(14:0/0:0)	GP	LPC	C22H46NO7P	468.303	467.301	6.6165	[M+H]+	9.55503	1	0.887	rp	20559-16-4	460604	HMDB0010379	-	C00157	A	200266	139007	188353	137573	151749	178825	169813	168798	168716	ko00564,ko00590,ko00591,ko00592,ko01100,ko04723,ko05231
T3_positive	MW0057887	1-(1-Enyl-palmitoyl)-2-palmitoleoyl-sn-glycero-3-phosphocholine	GP	PC-P	C40H78NO7P	754.527	715.552	7.5032	[M+K]+	1.96897	4	0.9531	rp	204983-72-2	52923882	HMDB0011207	-	C00157	A	18858.6	13443.8	28679.4	82391.8	44475.9	90010.4	34023.1	33266	31423.8	ko00564,ko00590,ko00591,ko00592,ko01100,ko04723,ko05231
T3_positive	MW0053733	Glycerophospho-N-Oleoyl Ethanolamine	GP	PE	C23H46NO7P	502.287	479.301	6.819	[M+Na]+	4.29343	2	0.7724	rp	201738-24-1	16123469	-	45335	C00350	A	123159	96048.7	117630	65353.7	72470.5	86685	84166.4	84773	84199.2	ko00563,ko00564,ko01100,ko04136,ko04140,ko04723,ko05167
T3_positive	MW0011897	PC(8:0/8:0)	GP	PC	C24H48NO8P	548.269	509.312	6.7959	[M+K]+	11.7649	1	0.7213	rp	19191-91-4	24779244	-	45203	C00157	A	5594.66	5106.23	7692.7	3797.05	1636.89	4493.33	4598.06	4705.48	4635.98	ko00564,ko00590,ko00591,ko00592,ko01100,ko04723,ko05231
T3_positive	MW0063582	sn-Glycerol 3-phosphate	GP	GP	C3H9O6P	219.024	172.014	0.7728	[M+HCOO+2H]+	6.575	3	0.7405	rp	17989-41-2	439162	HMDB0000126	5161	C00093	A	58922.5	64104.6	69530.2	67426.4	77793.1	79681.6	75706.2	75204.5	75586.8	ko00561,ko00564,ko01100,ko02010,ko05231
T3_positive	MW0057361	[(2R)-2-[(5Z,8Z,11Z,14E)-icosa-5,8,11,14-tetraenoyl]oxy-3-[(5Z,8Z,11Z,14Z)-icosa-5,8,11,14-tetraenoyl]oxypropyl] 2-(trimethylazaniumyl)ethyl phosphate	GP	PC	C48H80NO8P	847.605	829.562	6.2226	[M+NH4]+	1.39327	4	0.9664	rp	17688-29-8	6441408	HMDB0008443	-	C00157	A	736032	597247	600107	411288	572476	587626	358745	223218	343202	ko00564,ko00590,ko00591,ko00592,ko01100,ko04723,ko05231
T3_positive	MW0054524	LPC(16:0/0:0)	GP	LPC	C24H50NO7P	496.334	495.332	7.0833	[M+H]+	9.90325	1	0.8933	rp	17364-16-8	460602	HMDB0010382	-	C00157	A	98110.8	81770.6	1.40853e+06	49391.5	987844	1.00619e+06	858152	852117	848308	ko00564,ko00590,ko00591,ko00592,ko01100,ko04723,ko05231
T3_positive	MW0016119	beta-Glycerophosphoric acid	GP	GP	C3H9O6P	173.026	172.014	1.4053	[M+H]+	14.5376	1	0.7482	rp	17181-54-3	2526	HMDB0002520	6708	C02979	A	5662.59	6865.77	6136.94	1462.05	2514.46	4558.89	5007.72	5019.8	4878.84	-
T3_positive	MW0054553	LPC(22:6/0:0)	GP	LPC	C30H50NO7P	568.334	567.332	6.8169	[M+]+	11.4753	1	0.767	rp	162440-05-3	10415542	HMDB0010404	-	C00157	A	38974.4	52796	44115.2	24620.3	27212.7	30042.6	29637	29737	29384.4	ko00564,ko00590,ko00591,ko00592,ko01100,ko04723,ko05231
T3_positive	MW0059056	1-(1Z-octadecenyl)-2-(5Z,8Z,11Z,14Z-eicosatetraenoyl)-sn-glycero-3-phosphoethanolamine	GP	PE	C43H78NO7P	734.555	751.552	6.5593	[M+H-H2O]+	15.4707	2	0.7726	rp	144371-69-7	9547058	HMDB0005779	6548	C00350	A	10514.1	6981.32	42257.8	185959	64846.2	84486.9	167423	199054	215068	ko00563,ko00564,ko01100,ko04136,ko04140,ko04723,ko05167
T3_positive	MW0055721	PA(18:1(9Z)/18:1(9Z))	GP	PA	C39H73O8P	723.498	700.504	7.5207	[M+Na]+	11.9604	2	0.7447	rp	14268-17-8	14057128	HMDB0007865	-	-	A	3057.3	5102.36	4143.31	2012.51	2988.57	2858.85	2476.83	2605.03	2687.76	-
T3_positive	MW0012958	PAz-PC	GP	PC	C33H64NO10P	688.412	665.427	7.6422	[M+Na]+	4.27467	2	0.7574	rp	117205-52-4	46907870	-	63020	C00157	A	20149.3	18873.7	18574.5	14380.7	13859.1	12209.5	12122.6	11993.7	11844.5	ko00564,ko00590,ko00591,ko00592,ko01100,ko04723,ko05231
T3_positive	MW0012982	LPC(15:0/0:0)	GP	LPC	C23H48NO7P	482.318	481.317	6.8542	[M+H]+	8.78264	1	0.919	rp	-	24779458	HMDB0010375	-	C00157	A	86201.4	93821.6	150808	59958.3	63344.6	63512.4	58285.7	57753.9	57256.5	ko00564,ko00590,ko00591,ko00592,ko01100,ko04723,ko05231
T3_positive	MEDP1171	Butenoyl-PAF	GP	PC	C28H56NO7P	550.379	549.379	6.819	[M+H]+	11.2376	1	0.9022	rp	-	45138381	-	62941	C00157	A	56352.5	46525	15982.1	32026.7	40553.7	45055	47507.8	46918.3	46482.5	ko00564,ko00590,ko00591,ko00592,ko01100,ko04723,ko05231
T3_positive	MEDP1318	LPC(0:0/22:4)	GP	LPC	C30H55NO7P	572.363	572.372	7.1879	[M+]+	1.44583	1	0.8659	rp	-	-	-	-	C00157	A	7831.94	5181.61	1004.63	4623.6	5568.11	5024.48	3158.18	3142.86	2787.53	ko00564,ko00590,ko00591,ko00592,ko01100,ko04723,ko05231
T3_positive	MEDP1166	PC(16:0/2:0)	GP	PC	C26H52NO8P	520.333	537.343	6.8366	[M+H-H2O]+	13.6792	1	0.8425	rp	-	16759367	-	-	C00157	A	38757.3	32694.8	51403.5	23489.1	23666.8	23842.6	29641.3	29607.8	29067.3	ko00564,ko00590,ko00591,ko00592,ko01100,ko04723,ko05231
T3_positive	MEDP1221	PC(O-16:0/O-1:0)	GP	LPC	C25H54NO6P	496.369	495.369	6.7063	[M+H]+	11.4471	1	0.8198	rp	-	-	-	-	C00157	A	27584.7	27376.8	19250.8	34866.4	10073.2	20200.4	14776.6	14568.7	14787.2	ko00564,ko00590,ko00591,ko00592,ko01100,ko04723,ko05231
T3_positive	MEDP1331	LPC(0:0/20:3)	GP	LPC	C28H52NO7P	569.336	545.348	6.819	[M+Na]+	11.3362	1	0.8141	rp	-	165415738	-	-	C00157	A	12186.2	9900.49	13203.4	8722.46	8835.68	9119.31	10394.6	10968.8	10894.6	ko00564,ko00590,ko00591,ko00592,ko01100,ko04723,ko05231
T3_positive	MEDP1165	PC(O-16:0/O-2:0)	GP	LPC	C26H56NO6P	527.428	509.385	8.1399	[M+NH4]+	15.6771	1	0.7194	rp	-	-	-	-	C00157	A	22492.4	22501.7	22190.9	19101.2	15332.5	16378.9	27043.5	29267.7	27678.4	ko00564,ko00590,ko00591,ko00592,ko01100,ko04723,ko05231
T3_positive	MEDP1321	LPC(0:0/22:5)	GP	LPC	C30H53NO7P	570.347	570.356	6.9245	[M+]+	12.4182	1	0.7073	rp	-	165415626	-	-	C00157	A	10535.5	9360.71	12423.4	6950.43	7210.69	8790.11	7585.86	7727.64	7736.94	ko00564,ko00590,ko00591,ko00592,ko01100,ko04723,ko05231
T3_positive	MW0054562	1-(1Z-hexadecenyl)-sn-glycero-3-phosphocholine	GP	PC	C24H50NO6P	480.338	479.338	7.3812	[M+H]+	12.5436	2	0.8565	rp	-	10917802	HMDB0010407	-	C00157	A	72377.1	49887.1	49933.8	37453.7	53623	44053.8	37700.4	38335.6	37154.6	ko00564,ko00590,ko00591,ko00592,ko01100,ko04723,ko05231
T3_positive	MW0060366	PE-NMe2(18:1(9Z)/18:1(9Z))	GP	PI	C43H82NO8P	794.556	771.578	6.6936	[M+Na]+	13.7443	2	0.8351	rp	-	9547022	HMDB0010564	-	-	A	4599.13	18433.9	20939.7	7391.44	16410.9	6477.74	10108.7	10822.8	10795.7	-
T3_positive	MW0011905	1,2-Dioleoyl-sn-glycero-3-phosphoethanolamine	GP	PE	C41H78NO8P	744.552	743.547	6.6673	[M+H]+	9.91414	2	0.7538	rp	-	9546757	HMDB0009059	-	C00350	A	19295.7	16148	2101.58	16179.9	24975.7	37960.4	46071.2	37463.7	41342.1	ko00563,ko00564,ko01100,ko04136,ko04140,ko04723,ko05167
T3_positive	MW0056906	1-Palmitoyl-2-docosahexaenoyl-sn-glycero-3-phosphocholine	GP	PC	C46H80NO8P	806.558	805.562	6.5502	[M+H]+	10.6707	2	0.7413	rp	-	6441886	HMDB0007991	-	C00157	A	41389.1	14753	65291.7	49191.6	106540	204973	95568.6	107681	113844	ko00564,ko00590,ko00591,ko00592,ko01100,ko04723,ko05231
T3_positive	MW0011922	1,2-Dipentadecanoyl-sn-glycero-3-phosphocholine	GP	PC	C38H76NO8P	706.53	705.531	6.8366	[M+H]+	7.28428	2	0.741	rp	-	24778654	HMDB0007934	-	C00157	A	267906	124689	22741.2	1.61522e+06	42423.4	301482	481209	504646	411508	ko00564,ko00590,ko00591,ko00592,ko01100,ko04723,ko05231
T3_positive	MW0056798	PC(14:0/20:4(5Z,8Z,11Z,14Z))	GP	PC	C42H76NO8P	838.5	753.531	6.5684	[M+K+HCOOH]+	0.966011	3	0.9902	rp	-	24778634	HMDB0007883	-	C00157	A	46286.7	60573.2	24865.2	5417.87	5979.47	17336.5	2043.57	1995.81	2051.15	ko00564,ko00590,ko00591,ko00592,ko01100,ko04723,ko05231
T3_positive	MW0058250	1-(9Z-octadecenoyl)-2-pentadecanoyl-glycero-3-phosphoethanolamine	GP	PE	C38H74NO8P	726.504	703.515	6.5773	[M+Na]+	0.564346	3	0.9258	rp	-	52924339	HMDB0009054	-	C00350	A	45395.6	23176.5	28731.1	38067.1	35366.2	38651.8	43183.6	42777.2	43298.9	ko00563,ko00564,ko01100,ko04136,ko04140,ko04723,ko05167
T3_positive	MW0059306	PE-NMe(15:0/20:2(11Z,14Z))	GP	PE	C41H78NO8P	785.579	743.547	6.9604	[M+CH3CN+H]+	1.15838	3	0.8954	rp	-	131820140	HMDB0113025	-	C00350	A	83191.1	320559	129346	207103	297987	192460	114677	117387	103853	ko00563,ko00564,ko01100,ko04136,ko04140,ko04723,ko05167
T3_positive	MW0059304	PE-NMe(15:0/20:0)	GP	PE	C41H82NO8P	794.59	747.578	6.7662	[M+HCOO+2H]+	0.578915	3	0.8883	rp	-	131820139	HMDB0113024	-	C00350	A	10809.2	5989.67	16892.1	118968	5823.47	44518.5	67744	69436.2	97070.2	ko00563,ko00564,ko01100,ko04136,ko04140,ko04723,ko05167
T3_positive	MW0057931	PC(P-18:0/20:3(8Z,11Z,14Z))	GP	PC-P	C46H86NO7P	834.588	795.614	7.4945	[M+K]+	1.01632	4	0.9752	rp	-	52923962	HMDB0011252	-	C00157	A	11125.4	7958.04	9315.21	4026.85	22146.7	17892.4	11725.5	10524.2	11124.2	ko00564,ko00590,ko00591,ko00592,ko01100,ko04723,ko05231
T3_positive	MW0059071	PE(P-16:0/20:3(8Z,11Z,14Z))	GP	PE-P	C41H76NO7P	748.521	725.536	6.5593	[M+Na]+	1.29711	4	0.9686	rp	-	52925060	HMDB0011351	-	C00350	A	18285.3	2991.21	13537.2	62587.6	249645	158726	61892.1	88660	95137.1	ko00563,ko00564,ko01100,ko04136,ko04140,ko04723,ko05167
T3_positive	MW0062363	1-pentadecanoyl-2-(11Z-eicosenoyl)-glycero-3-phosphoserine	GP	PS	C41H78NO10P	798.532	775.536	6.8169	[M+Na]+	8.59398	4	0.8254	rp	-	52925261	HMDB0112285	-	-	A	12671.5	8780.35	7990.45	11209.9	24316.6	3855.81	37374	37849.9	35429.6	-
T3_positive	MW0056864	PC(15:0/20:4(5Z,8Z,11Z,14Z))	GP	PC	C43H78NO8P	768.557	767.547	6.9425	[M+H]+	9.76374	4	0.8069	rp	-	52922330	HMDB0007949	-	C00157	A	11965.7	52329.3	8908.83	69251.9	10605.8	161193	166020	166868	145528	ko00564,ko00590,ko00591,ko00592,ko01100,ko04723,ko05231
T3_positive	MW0056850	1-Pentadecanoyl-2-hexadecanoyl-sn-glycero-3-phosphocholine	GP	PC	C39H78NO8P	720.547	719.547	7.4858	[M+H]+	10.4314	4	0.7968	rp	-	24778655	HMDB0007935	-	C00157	A	68138.3	66903.1	64691.1	46629.1	132351	50820.4	57281.1	56540.1	59232.7	ko00564,ko00590,ko00591,ko00592,ko01100,ko04723,ko05231
T3_positive	MW0062372	1-pentadecanoyl-2-(13Z,16Z-docosadienoyl)-glycero-3-phosphoserine	GP	PS	C43H80NO10P	840.509	801.552	6.5684	[M+K]+	0.0185889	4	0.7495	rp	-	52925268	HMDB0116749	-	-	A	7802.5	7835.11	5876.47	11525.2	1178.41	3091.97	5338.68	5351.37	5264.59	-
T3_positive	MW0058802	PE(22:4(7Z,10Z,13Z,16Z)/22:6(4Z,7Z,10Z,13Z,16Z,19Z))	GP	PE	C49H78NO8P	857.574	839.547	6.808	[M+NH4]+	0.602468	4	0.7352	rp	-	52923868	HMDB0009605	-	C00350	A	13560.8	2586.88	14658.7	5967.02	6924.39	43068.5	5711.75	5692.37	5530.19	ko00563,ko00564,ko01100,ko04136,ko04140,ko04723,ko05167
T3_positive	MW0055636	1-(9Z-hexadecenoyl)-2-(9Z-tetradecenoyl)-glycero-3-phosphate	GP	PA	C33H61O8P	639.4	616.41	7.5379	[M+Na]+	0.658977	4	0.7338	rp	-	52928795	HMDB0114853	-	-	A	1771.06	1272.16	1863.03	1287.74	1977.75	2205.19	1987	1976.08	1980.98	-
T3_negative	MW0012919	LPE(18:0/0:0)	GP	LPE	C23H48NO7P	478.295	481.317	7.1124	[M-H]-	2.85955	1	0.9336	rp	69747-55-3	9547068	HMDB0011130	-	C00157	A	20276.6	15297.7	17684.7	15047.8	15363.4	16132.1	15276.9	15284.3	15276.5	ko00564,ko00590,ko00591,ko00592,ko01100,ko04723,ko05231
T3_negative	MW0054613	LPE(20:4/0:0)	GP	LPE	C25H44NO7P	500.278	501.286	6.8058	[M-H]-	2.75641	1	0.9568	rp	652149-09-2	42607465	HMDB0011517	-	C04438	A	70474.5	51818.2	66170.4	51452.1	50786	54744.8	58867.6	59171.6	60147.3	ko00564
T3_negative	MW0112916	3-Phosphoglyceric acid	GP	PA	C3H7O7P	184.986	185.993	1.3886	[M-H]-	1.9	3	0.7519	rp	3443-58-1	439183	HMDB0060180	-	C00197	A	3192.08	2916.43	5051.36	3274.7	3601.93	2745.2	2705.3	2865.35	3091.75	ko00010,ko00030,ko00260,ko00270,ko00561,ko00630,ko01100,ko01200,ko01230,ko01240,ko04922,ko05230
T3_negative	MW0012998	LPC(18:0/0:0)	GP	LPC	C26H54NO7P	582.378	523.364	6.718	[M+CH3COO]-	5.84335	2	0.7665	rp	19420-57-6	497299	HMDB0010384	-	C00157	A	100102	121996	124545	69767.8	76601.5	70125.1	66017.2	66581	66047.5	ko00564,ko00590,ko00591,ko00592,ko01100,ko04723,ko05231
T3_negative	MEDN1267	LPE(0:0/22:5)	GP	LPE	C27H46NO7P	526.295	527.301	6.891	[M-H]-	6.54139	1	0.9347	rp	-	53480944	HMDB0011494	-	C04438	A	4653.07	3367.64	6338.07	6016.95	7505.76	7286.74	5938.77	5906.9	5924.49	ko00564
T3_negative	MEDN1278	LPE(20:5/0:0)	GP	LPE	C25H42NO7P	498.263	499.27	6.5825	[M-H]-	0.563966	1	0.9204	rp	-	52925146	HMDB0011519	-	C04438	A	6181.95	5729.02	6562.58	3495.87	4595.54	5809.4	4822.14	4811.64	4929.71	ko00564
T3_negative	MEDN1285	LPE(0:0/16:0)	GP	LPE	C21H44NO7P	452.279	453.286	7.0784	[M-H]-	1.21155	1	0.8573	rp	-	53480922	HMDB0011473	-	C04438	A	36664.5	25931.7	31273	33829.9	35115.3	37067.6	33636	33874.5	34124.7	ko00564
T3_negative	MW0013103	Glycerophosphoric acid	GP	PA	C3H9O6P	217.004	172.014	1.61	[M+HCOO]-	13.8169	2	0.7181	rp	-	754	HMDB0252849	-	C03189	A	179547	150781	152411	148977	186872	143199	164621	161576	164444	-
T3_negative	MW0011785	1-(11Z-eicosenoyl)-glycero-3-phosphate	GP	PA	C23H45O7P	509.289	464.29	7.542	[M+HCOO]-	3.72719	3	0.7859	rp	-	52929759	HMDB0062305	-	-	A	26257.3	42363.2	51860	26276.3	35620.2	35911.9	28805.3	30278	31562.4	-
T3_negative	MW0057917	1-(1Z-octadecenyl)-2-pentadecanoyl-glycero-3-phosphocholine	GP	PC-P	C41H82NO7P	766.541	731.583	6.8058	[M+Cl]-	16.2545	4	0.7218	rp	-	52923930	HMDB0011238	-	C00157	A	45876.6	40373.3	852.313	39862.3	33345.4	73558.7	61335.5	62261.4	62314.1	ko00564,ko00590,ko00591,ko00592,ko01100,ko04723,ko05231
HILIC_negative	MW0011918	1,2-Dipalmitoyl-sn-glycero-3-phosphoethanolamine	GP	PS	C37H74NO8P	672.498	691.515	0.8927	[M-H2O-H]-	14.0782	2	0.715	hilic	923-61-5	445468	HMDB0008923	-	-	A	108299	94793.7	98030.2	109747	103613	108382	95202.9	94591.3	94476.8	-
HILIC_negative	MW0013003	1-Stearoyl-2-linoleoyl-sn-glycero-3-phosphoethanolamine	GP	PE	C41H78NO8P	742.542	743.547	0.8927	[M-H]-	2.9703	2	0.7954	hilic	7266-53-7	9546749	HMDB0008994	-	C00350	A	833124	845793	903878	929598	850976	993528	814831	810390	814941	ko00563,ko00564,ko01100,ko04136,ko04140,ko04723,ko05167
HILIC_negative	MW0013395	1-hexadecanoyl-2-(5Z,8Z,11Z,14Z-eicosatetraenoyl)-sn-glycero-3-phosphoethanolamine	GP	PE	C41H74NO8P	738.511	739.515	0.8808	[M-H]-	7.1328	2	0.7732	hilic	70812-59-8	9546800	HMDB0008937	-	C00350	A	212864	160803	172496	163737	165931	208749	169001	169101	171160	ko00563,ko00564,ko01100,ko04136,ko04140,ko04723,ko05167
HILIC_negative	MW0012863	1-Myristoyl-2-stearoyl-sn-glycero-3-phosphocholine	GP	PC	C40H80NO8P	778.563	733.562	1.0859	[M+HCOO]-	7.03166	2	0.9246	hilic	61510-09-6	131150	HMDB0006727	-	C00157	A	160686	160261	166192	154962	140673	170195	154704	154293	156113	ko00564,ko00590,ko00591,ko00592,ko01100,ko04723,ko05231
HILIC_negative	MW0013396	PE(18:0/20:4(5Z,8Z,11Z,14Z))	GP	PE	C43H78NO8P	766.542	767.547	0.878	[M-H]-	7.6757	2	0.7521	hilic	61216-62-4	5289133	HMDB0009003	-	C00350	A	882759	757578	768449	791401	669640	889300	705768	706146	714411	ko00563,ko00564,ko01100,ko04136,ko04140,ko04723,ko05167
HILIC_negative	MW0013008	1-Stearoyl-2-oleoyl-sn-glycero-3-phosphocholine	GP	PC	C44H86NO8P	832.609	787.609	0.8927	[M+HCOO]-	2.53846	2	0.9601	hilic	56421-10-4	24778825	HMDB0008038	-	C00157	A	960875	806028	563204	953467	825364	630890	716374	717400	678695	ko00564,ko00590,ko00591,ko00592,ko01100,ko04723,ko05231
HILIC_negative	MW0054600	LPE(16:0/0:0)	GP	LPE	C21H44NO7P	452.277	453.286	1.1774	[M-H]-	3.20266	1	0.9563	hilic	53862-35-4	9547069	HMDB0011503	-	C04438	A	10766	8946.84	11562.6	8053.61	1979.11	7048.56	10601.7	10559.3	10571.5	ko00564
HILIC_negative	MW0011902	1,2-Dioleoyl-sn-Glycero-3-Phosphocholine	GP	PC	C44H84NO8P	830.594	785.593	0.8927	[M+HCOO]-	7.93755	2	0.9308	hilic	4235-95-4	10350317	HMDB0000593	-	C00157	A	903577	781841	1.06623e+06	1.08416e+06	1.13609e+06	1.19504e+06	985201	987623	950033	ko00564,ko00590,ko00591,ko00592,ko01100,ko04723,ko05231
HILIC_negative	MW0012956	PC(16:0/20:4(5Z,8Z,11Z,14Z))	GP	PC	C44H80NO8P	826.562	781.562	0.8927	[M+HCOO]-	5.95639	2	0.9066	hilic	35418-58-7	10747814	HMDB0007982	-	C00157	A	130916	143839	160344	145635	143350	166693	149593	148513	148681	ko00564,ko00590,ko00591,ko00592,ko01100,ko04723,ko05231
HILIC_negative	MW0063578	2-(((R)-2,3-Dihydroxypropyl)phosphoryloxy)-N,N,N-trimethylethanaminium	GP	PC	C8H21NO6P+	302.1	258.111	3.7119	[M+HCOO]-	1.40135	1	0.8357	hilic	28319-77-9	439285	HMDB0000086	-	C00670	A	7828.25	8606.41	8129.07	7850.88	8679.59	8306.21	7708.78	7685.52	7600.18	ko00564,ko00565,ko05231
HILIC_negative	MW0056887	1-Palmitoyl-2-oleoyl-sn-glycero-3-phosphocholine	GP	PC	C42H82NO8P	804.58	759.578	0.8927	[M+HCOO]-	4.05024	2	0.9613	hilic	26853-31-6	5497103	HMDB0007972	-	C00157	A	4.38086e+06	3.63711e+06	3.81907e+06	3.94898e+06	3.98932e+06	4.03773e+06	3.42164e+06	3.45339e+06	3.30474e+06	ko00564,ko00590,ko00591,ko00592,ko01100,ko04723,ko05231
HILIC_negative	MW0058121	1-Palmitoyl-2-oleoyl-sn-glycero-3-phosphoethanolamine	GP	PE	C39H76NO8P	717.53	717.531	0.8927	[M-]-	5.49873	2	0.7398	hilic	26662-94-2	5283496	HMDB0008927	-	C00350	A	342673	317198	281642	337960	298323	300334	286009	280437	279104	ko00563,ko00564,ko01100,ko04136,ko04140,ko04723,ko05167
HILIC_negative	MW0059055	GPEtn(16:0p/22:6(4Z,7Z,10Z,13Z,16Z,19Z))	GP	PE-O	C43H74NO7P	782.506	747.52	0.9309	[M+Cl]-	14.3258	4	0.7443	hilic	206059-97-4	5283497	HMDB0005780	6548	C00350	A	7890.64	14669.3	8781.83	8679.86	10085	17783.8	8189.85	8475.75	8108.61	ko00563,ko00564,ko01100,ko04136,ko04140,ko04723,ko05167
HILIC_negative	MW0061712	14,15-Leukotriene C4(ExC4)	GP	PI	C47H83O13P	886.557	886.557	0.9283	[M-]-	2.04509	2	0.7407	hilic	206059-96-3	42607491	HMDB0009815	-	-	A	737972	626218	677696	870021	847663	959653	776082	728475	739848	-
HILIC_negative	MW0054535	1-(9Z-octadecenoyl)-sn-glycero-3-phosphocholine	GP	LPC	C26H52NO7P	566.346	521.348	1.1592	[M+HCOO]-	0.493924	2	0.962	hilic	19420-56-5	16081932	HMDB0002815	-	C00157	A	37278.5	39752.9	57750.6	30110.7	23178.9	39675.8	30493.7	30394.8	30339.9	ko00564,ko00590,ko00591,ko00592,ko01100,ko04723,ko05231
HILIC_negative	MW0054522	1-O-Hexadecyl-lyso-sn-glycero-3-phosphocholine	GP	LPC	C24H52NO6P	526.351	481.353	1.1783	[M+HCOO]-	0.343619	2	0.8591	hilic	17364-21-5	3983	-	24070	C00157	A	8906.85	7172.05	12730.3	9536.19	8340.22	13867.1	11324.4	11156.9	10947.6	ko00564,ko00590,ko00591,ko00592,ko01100,ko04723,ko05231
HILIC_negative	MW0057831	PC(O-16:0/22:6(4Z,7Z,10Z,13Z,16Z,19Z))	GP	PC	C46H82NO7P	791.603	791.583	1.171	[M-]-	0.0847855	2	0.7662	hilic	132213-85-5	16759366	HMDB0013409	-	C00157	A	1866.1	4363.05	3995.31	2251.19	1812.77	3766.3	3510.84	3765.14	3680.4	ko00564,ko00590,ko00591,ko00592,ko01100,ko04723,ko05231
HILIC_negative	MW0012992	PS(18:0/20:4)	GP	PS	C44H78NO10P	810.532	811.536	1.125	[M-H]-	2.59477	2	0.9308	hilic	132014-80-3	24779545	HMDB0012383	-	-	A	14945.6	11815.7	21492.2	19704.4	21795.9	23059.1	12115.1	11448.2	12341.9	-
HILIC_negative	MEDN1251	LPI(16:0)	GP	LPI	C25H49O12P	571.289	572.296	1.4846	[M-H]-	5.73973	1	0.9061	hilic	-	42607493	-	-	C03819	A	6630.35	4417.58	5794.48	3652.28	4031.38	5458.11	5130.17	5082.92	5128.58	ko00564
HILIC_negative	MW0054571	LPE(0:0/18:0)	GP	LPE	C23H48NO7P	480.309	481.317	1.1594	[M-H]-	3.17976	1	0.8516	hilic	-	53480667	HMDB0011129	-	C04438	A	43664.4	40174.9	48452.4	7564.33	1372.54	1806.39	42066	42024.1	42238.4	ko00564
HILIC_negative	MEDN1254	LPI(18:1)	GP	LPI	C27H51O12P	597.304	598.312	1.4138	[M-H]-	4.606	1	0.7582	hilic	-	42607496	-	-	C03819	A	16650	13472.8	17652.9	11627.7	10363.6	15345.8	13549.8	13699.6	13542.9	ko00564
HILIC_negative	MW0012811	1-Hexadecanoyl-2-(9Z-octadecenoyl)-sn-glycero-3-phospho-(1'-myo-inositol)	GP	PI	C43H81O13P	835.537	836.542	0.9104	[M-H]-	6.63578	2	0.944	hilic	-	5771758	HMDB0009783	-	-	A	244287	220638	264315	198765	199846	209723	259023	245728	260613	-
HILIC_negative	MW0013615	1-octadecanoyl-2-(9Z-octadecenoyl)-sn-glycero-3-phosphoserine	GP	PC	C42H80NO10P	788.547	789.552	1.145	[M-H]-	5.52608	2	0.943	hilic	-	9547087	HMDB0010163	-	C00157	A	59391.4	33109.7	65642.2	46689.9	49541.2	3356.82	54512.5	53608.2	53512.9	ko00564,ko00590,ko00591,ko00592,ko01100,ko04723,ko05231
HILIC_negative	MW0012940	1-Oleoyl-2-myristoyl-sn-glycero-3-phosphocholine	GP	PC	C40H78NO8P	776.55	731.547	1.0859	[M+HCOO]-	14.8252	2	0.897	hilic	-	24778931	HMDB0008097	-	C00157	A	346346	333392	357826	342578	316909	364830	340585	339415	342241	ko00564,ko00590,ko00591,ko00592,ko01100,ko04723,ko05231
HILIC_negative	MW0013614	1-Hexadecanoyl-2-(9Z-octadecenoyl)-sn-glycero-3-phosphoserine	GP	PS	C40H76NO10P	760.515	761.521	1.1594	[M-H]-	5.59397	2	0.8956	hilic	-	5283499	HMDB0012357	-	-	A	36585.5	40702.2	40099.5	31170.8	30283.3	31087.1	36657.8	36057.6	35879.3	-
HILIC_negative	MW0056784	1-Myristoyl-2-palmitoyl-sn-glycero-3-phosphocholine	GP	PC	C38H76NO8P	750.542	705.531	1.0947	[M+HCOO]-	19.4574	2	0.8785	hilic	-	129657	HMDB0007869	-	C00157	A	116784	165726	158097	102708	70560.4	42061.6	163153	155902	158792	ko00564,ko00590,ko00591,ko00592,ko01100,ko04723,ko05231
HILIC_negative	MW0062442	Phosphatidylserine	GP	PS	C42H82NO10P	790.579	791.568	1.0859	[M-H]-	7.73614	2	0.8687	hilic	-	9547096	HMDB0012378	-	-	A	97937.6	118407	129652	103634	117762	180179	155904	155796	157963	-
HILIC_negative	MW0057932	PC(P-18:0/20:4(5Z,8Z,11Z,14Z))	GP	PC-P	C46H84NO7P	838.592	793.598	0.947	[M+HCOO]-	6.17996	2	0.8505	hilic	-	24779390	HMDB0011253	-	C00157	A	15849.1	5718.19	25930.9	7995.64	28270.4	3288.57	10357.3	11045.7	9748.25	ko00564,ko00590,ko00591,ko00592,ko01100,ko04723,ko05231
HILIC_negative	MW0011927	1,2-Distearoyl-sn-glycero-3-phosphocholine	GP	PC	C44H88NO8P	834.614	789.625	0.8982	[M+HCOO]-	10.8003	2	0.8363	hilic	-	94190	HMDB0008036	-	C00157	A	117291	112539	66476.7	62973.4	65919.8	115635	92090.5	86479.9	88257.5	ko00564,ko00590,ko00591,ko00592,ko01100,ko04723,ko05231
HILIC_negative	MW0055663	1-octadecanoyl-2-(9Z-octadecenoyl)-sn-glycero-3-phosphate	GP	PA	C39H75O8P	761.52	702.52	1.1644	[M+CH3COO]-	19.8287	2	0.722	hilic	-	24779560	-	40933	-	A	18150.2	21636.4	19132.9	15801	15446.9	14799.5	17500.2	17879.6	17465.9	-
HILIC_negative	MW0013662	2-Stearoylglycerophosphoinositol	GP	PI	C27H53O12P	599.32	600.327	1.4492	[M-H]-	0.877575	3	0.7456	hilic	-	131770413	HMDB0061704	-	-	A	29695	23817.1	29629.9	19530.2	16224.3	27734.7	24432.4	24229.1	24060.4	-
HILIC_negative	MW0056982	1-Vaccenoyl-2-pentadecanoyl-sn-glycero-3-phosphocholine	GP	PC	C41H80NO8P	744.558	745.562	0.8927	[M-H]-	2.58438	3	0.7177	hilic	-	53478715	HMDB0008066	-	C00157	A	544335	515863	647807	494046	626100	716285	533381	535117	549143	ko00564,ko00590,ko00591,ko00592,ko01100,ko04723,ko05231
HILIC_negative	MW0012773	1-arachidonoyl-sn-glycero-3-phospho-1D-myo-inositol	GP	PI	C29H49O12P	619.289	620.296	1.3961	[M-H]-	0.59688	3	0.7143	hilic	-	86290034	HMDB0061690	-	-	A	25023.2	19332.8	24846.3	15778.3	17210.5	20223.7	19903.9	20047.6	19815.2	-
HILIC_negative	MW0061555	PGP(a-13:0/i-24:0)	GP	PG-P	C43H86O13P2	907.535	872.554	0.9283	[M+Cl]-	5.30944	4	0.8834	hilic	-	131823184	HMDB0116529	-	C00344	A	22252	18424.8	19274.3	24833.3	24233.6	30190.1	22626.6	21771.8	22653.3	ko00564,ko01100
HILIC_negative	MW0057441	PC(20:5(5Z,8Z,11Z,14Z,17Z)/P-18:1(11Z))	GP	PC	C46H80NO7P	824.548	789.567	0.8927	[M+Cl]-	7.29356	4	0.8472	hilic	-	53479143	HMDB0008523	-	C00157	A	49689.6	54571.8	58734.1	51575.8	36814.2	60404.3	49040.4	47229.4	47473.3	ko00564,ko00590,ko00591,ko00592,ko01100,ko04723,ko05231
HILIC_negative	MW0059074	PE(P-16:0/20:5(5Z,8Z,11Z,14Z,17Z))	GP	PE-P	C41H72NO7P	720.498	721.505	0.8635	[M-H]-	8.81359	4	0.8218	hilic	-	52925061	HMDB0011354	-	C00350	A	139214	125927	121853	117267	106679	121835	106581	105937	105962	ko00563,ko00564,ko01100,ko04136,ko04140,ko04723,ko05167
HILIC_negative	MW0141123	1,2-Dioleoyl-sn-glycero-3-phospho-(1'-myo-inositol)	GP	PI	C45H83O13P	861.553	862.557	1.125	[M-H]-	2.5785	2	0.7465	hilic	-	-	HMDB0009837	-	C00626	A	271988	354524	246868	294593	258463	218026	203951	202724	136564	-
HILIC_negative	MW0058976	PE(DiMe(11,3)/DiMe(13,5))	GP	PE	C49H86NO10P	878.592	879.599	0.8752	[M-H]-	10.3054	4	0.7987	hilic	-	131770145	HMDB0061473	-	C00350	A	50275.5	40474	43835.8	44106.8	35180.1	52214.9	43644.5	44182.5	44222.5	ko00563,ko00564,ko01100,ko04136,ko04140,ko04723,ko05167
T3_positive	MW0157155	Spenolimycin	Heterocyclic compounds	Heterocyclic compounds	C15H26N2O7	364.204	346.174	2.4998	[M+NH4]+	6.91364	3	0.7117	rp	95041-97-7	125257	-	-	C17970	B	3922.77	3860.54	2798.41	3263.67	4462.2	2373.11	3660.41	3617.97	3624.81	-
T3_positive	MW0121583	N,N-Diallyl-5-methoxytryptamine	Heterocyclic compounds	Indole and Its derivatives	C17H22N2O	309.138	270.173	2.4029	[M+K]+	6.33077	2	0.7572	rp	928822-98-4	50878551	-	96656	-	B	132260	116008	128105	88951.1	111603	121180	121270	121368	121402	-
T3_positive	MEDP1315	Quinoline	Heterocyclic compounds	Heterocyclic compounds	C9H7N	130.063	129.058	2.562	[M+H]+	7.99575	1	0.7779	rp	91-22-5	7047	HMDB0033731	-	C06413	B	3070.58	3230.73	3246.26	2855.73	3651	3580.04	3397.33	3413.24	3389.47	-
T3_positive	MW0126892	Tropisetron	Heterocyclic compounds	Heterocyclic compounds	C17H20N2O2	285.165	284.152	5.4018	[M+H]+	8.24285	1	0.705	rp	89565-68-4	656665	-	-	-	B	3501.71	1702.95	2340.71	745.099	1110.72	519.403	1497.82	1498.16	1451.09	-
T3_positive	MW0139036	Myricatin	Heterocyclic compounds	Heterocyclic compounds	C22H16O15S	575.009	552.021	0.6787	[M+Na]+	0.0168472	4	0.9996	rp	87388-96-3	73829914	HMDB0029513	-	-	B	286272	259098	270469	209253	252280	271886	261185	261225	261698	-
T3_positive	MW0119158	Bis(2-methyl-4,5-dihydro-3-furyl) disulfide	Heterocyclic compounds	Heterocyclic compounds	C10H14O2S2	231.043	230.043	0.0648	[M+H]+	1.197	4	0.721	rp	85196-66-3	526180	HMDB0039670	-	-	B	8156.52	2957.04	2144.1	1615.16	626.766	1291.09	1218.15	1280.92	1261.95	-
T3_positive	MW0150710	HC-Toxin	Heterocyclic compounds	Heterocyclic compounds	C21H32N4O6	437.23	436.232	3.2787	[M+H]+	23.5386	2	0.8146	rp	83209-65-8	107864	-	64768	-	B	1479.45	3236.24	967.003	1367.07	5657.14	1274.52	7040.66	7124.45	7288	-
T3_positive	MW0109079	Perindopril	Heterocyclic compounds	Heterocyclic compounds	C19H32N2O5	391.225	368.231	3.9646	[M+Na]+	11.9835	2	0.7343	rp	82834-16-0	107807	HMDB0014928	-	C07706	B	787.561	844.172	1259.92	577.52	517.646	447.508	1466.92	1466.91	1469.47	-
T3_positive	MW0000420	Ranitidine	Heterocyclic compounds	Heterocyclic compounds	C13H22N4O3S	279.128	314.141	2.5264	[M+H-2H2O]+	2.54756	1	0.7694	rp	82530-72-1	3001055	HMDB0001930	-	-	B	78780.6	69980.2	73849.8	50785.7	63401.3	74357.6	70297.2	70351.1	70375.3	-
T3_positive	MW0138057	Ephedrannin A	Heterocyclic compounds	Heterocyclic compounds	C30H20O11	579.09	556.101	0.6787	[M+Na]+	0.788346	4	0.9807	rp	82001-39-6	21676348	HMDB0037654	-	-	B	13097.4	12560.7	14215.4	10688.2	16164.6	15242.3	14063.4	14094.4	14129.2	-
T3_positive	MW0017031	Chamissonolide	Heterocyclic compounds	Heterocyclic compounds	C17H24O6	325.169	324.157	2.9005	[M+H]+	9.96063	2	0.734	rp	78853-98-2	10019140	-	73573	-	B	141905	127336	139084	97993	118196	126031	131186	131130	131135	-
T3_positive	MW0116986	Cetylpyridinium	Heterocyclic compounds	Pyridine and pyridine derivatives	C21H38N+	304.296	304.3	6.3198	[M+]+	7.16586	2	0.8344	rp	7773-52-6	2683	-	34547	-	B	26253.5	33956.1	26523.4	24835.5	24967.9	25312.2	27402.2	27464.7	27378.6	-
T3_positive	MW0121552	5'-Hydroxypiroxicam	Heterocyclic compounds	Heterocyclic compounds	C15H13N3O5S	386.016	347.058	1.431	[M+K]+	1.47825	4	0.7144	rp	77459-78-0	54676301	HMDB0014096	-	-	B	3060.8	4573.51	3535.69	4687.12	3835.16	3320.97	3932.85	3937.92	3816.1	-
T3_positive	MW0119986	4-(Methylnitrosamino)-1-(3-pyridyl)-1-butanol	Heterocyclic compounds	Heterocyclic compounds	C10H15N3O2	232.107	209.116	2.5441	[M+Na]+	3.32109	2	0.7656	rp	76014-81-8	104856	HMDB0041809	-	C19574	B	10015.7	8922.92	10043.7	6756.51	8593.7	9799.46	9147.94	9093.84	9121.11	ko00980,ko05204
T3_positive	MW0123817	Enoxacin	Heterocyclic compounds	Heterocyclic compounds	C15H17FN4O3	321.127	320.128	2.8285	[M+H]+	23.0069	1	0.8105	rp	74011-58-8	3229	HMDB0014610	-	C06979	B	1062.76	3483.9	1194.35	1055.62	4172.15	1159.65	9030.13	9241.2	9276.62	-
T3_positive	MW0013300	24-epi-Brassinolide	Heterocyclic compounds	Heterocyclic compounds	C28H48O6	481.341	480.345	7.3638	[M+H]+	22.2831	2	0.724	rp	72962-43-7	443055	HMDB0034081	-	C11049	B	19948.8	7003.11	21707.8	10674.5	13679.4	10762.7	10017.4	9935.3	9849.01	-
T3_positive	MW0103797	Pimonidazole	Heterocyclic compounds	Heterocyclic compounds	C11H18N4O3	255.154	254.138	5.3423	[M+H]+	19.0675	2	0.7738	rp	70132-50-2	50981	-	44852	-	B	3317.64	4127.65	4878.96	3435.85	3831.02	4067.33	5761.6	5720.29	5721.34	-
T3_positive	MW0168781	Artemisinin	Heterocyclic compounds	Heterocyclic compounds	C15H22O5	282.138	282.147	6.641	[M+]+	20.8648	1	0.7143	rp	63968-64-9	68827	-	532	C09538	B	20350.8	23798	22849.3	16364.4	13872.4	14119.7	13518	14865.4	14175.7	-
T3_positive	MW0121842	7,8-Dimethyl-10-(2'-acetoxyethyl)isoalloxazine	Heterocyclic compounds	Heterocyclic compounds	C16H16N4O4	329.127	328.117	4.1146	[M+H]+	7.11662	2	0.7405	rp	6266-58-6	22641	-	96296	-	B	4061.08	4029.24	4017.78	4020.35	3392.8	4117.34	3931.44	4001.41	3910.72	-
T3_positive	MW0148594	Discadenine	Heterocyclic compounds	Heterocyclic compounds	C14H20N6O2	327.149	304.165	7.3638	[M+Na]+	11.675	3	0.7648	rp	62061-49-8	135398674	-	-	C01804	B	4944.12	3643.98	4424.26	1935.86	1951.29	1673.29	1248.48	1245.17	1181.82	-
T3_positive	MW0137580	Camostat	Heterocyclic compounds	Heterocyclic compounds	C20H22N4O5	399.174	398.159	7.3111	[M+H]+	14.3821	2	0.7057	rp	59721-28-7	2536	-	-	-	B	8465.27	5119.85	6946.63	3180.09	4452.31	4738.63	3394.42	3476.1	3423.74	-
T3_positive	MW0115417	trichostatin A	Heterocyclic compounds	Heterocyclic compounds	C17H22N2O3	303.174	302.163	3.7159	[M+H]+	7.30338	2	0.9016	rp	58880-19-6	444732	-	46755	-	B	17010.5	15852.2	13793.1	8413.27	22380.2	7292.32	13170.6	13330.2	13324	-
T3_positive	MW0010672	Theophylline	Heterocyclic compounds	Heterocyclic compounds	C7H8N4O2	198.096	180.065	3.0983	[M+NH4]+	8.36212	1	0.7806	rp	58-55-9	2153	HMDB0001889	1458	C07130	A	353655	313253	332762	236240	291203	329810	323670	324189	323602	ko00232,ko01100
T3_positive	MW0126047	Paxilline	Heterocyclic compounds	Heterocyclic compounds	C27H33NO4	436.249	435.241	6.3227	[M+H]+	6.08801	2	0.7469	rp	57186-25-1	105008	HMDB0030323	-	C13782	B	41275.9	40613.6	42315.8	39686.5	34974.6	39219.6	39503.6	39619	39329.8	-
T3_positive	MW0126891	Trolox	Heterocyclic compounds	Heterocyclic compounds	C14H18O4	251.122	250.12	6.1196	[M+H]+	16.2953	1	0.8121	rp	56305-04-5	40634	HMDB0038804	-	-	B	7361.1	8393.78	7901.28	4206.19	6524.13	5348.65	10350.2	10324.5	10368.3	-
T3_positive	MW0169829	Securinine	Heterocyclic compounds	Heterocyclic compounds	C13H15NO2	218.107	217.11	4.2578	[M+H]+	23.1949	1	0.7147	rp	5610-40-2	442872	-	43991	-	B	1689.54	3962.23	3625.64	2793.77	3118.86	3466.65	2901.51	2836.18	2801.18	-
T3_positive	MW0137952	Diethylstilbestrol	Heterocyclic compounds	Heterocyclic compounds	C18H20O2	269.15	268.146	5.9242	[M+H]+	8.20731	1	0.7521	rp	56-53-1	448537	HMDB0014400	-	C07620	B	5254.14	5247.27	5449.72	4425.95	4588.12	5318.4	4181.27	4190.17	4215.85	-
T3_positive	MW0124515	Isouron	Heterocyclic compounds	Heterocyclic compounds	C10H17N3O2	212.14	211.132	5.1642	[M+H]+	0.98788	2	0.841	rp	55861-78-4	41648	-	-	C18432	B	4575.02	1374.24	7901.61	3636.56	4931.22	4047.5	4719.44	4690.02	4610.78	-
T3_positive	MW0126267	protoporphyrin IX	Heterocyclic compounds	Heterocyclic compounds	C34H34N4O4	563.258	562.258	8.2721	[M+H]+	16.6412	1	0.8255	rp	553-12-8	4971	HMDB0000241	78	C02191 | C75594	A	7158.92	6157.95	5611.07	2336.62	2532.42	2345.63	2453.87	2392.93	2287.59	-
T3_positive	MW0126223	Praziquantel	Heterocyclic compounds	Heterocyclic compounds	C19H24N2O2	313.195	312.184	5.9588	[M+H]+	7.52336	1	0.8986	rp	55268-74-1	4891	HMDB0015191	-	C07367	B	5270.62	4788.43	5014.73	3583.73	4978.35	1476.05	6982.91	7069.48	6970.83	-
T3_positive	MW0122055	6-Chloro-1-methyl-1h-pyrazolo[3,4-d]pyrimidin-4-amine	Heterocyclic compounds	Heterocyclic compounds	C6H6ClN5	201.058	183.031	0.5864	[M+NH4]+	0.43225	4	0.7393	rp	5413-96-7	222250	-	-	-	B	10607.7	9613.41	11529.9	8469.72	8012.68	10265.3	9072.08	9038.14	9056.09	-
T3_positive	MW0138195	Fraxin	Heterocyclic compounds	Heterocyclic compounds	C16H18O10	393.079	370.09	0.7329	[M+Na]+	5.42481	2	0.9225	rp	524-30-1	5273568	-	-	-	B	1.51294e+06	1.41925e+06	1.44758e+06	1.19012e+06	1.16273e+06	1.26175e+06	1.20332e+06	1.2034e+06	1.19883e+06	-
T3_positive	MW0126417	Raltegravir	Heterocyclic compounds	Heterocyclic compounds	C20H21FN6O5	467.146	444.156	5.0841	[M+Na]+	1.47331	1	0.7723	rp	518048-05-0	54671008	-	-	-	B	5163.32	4613.39	5118.33	4622.18	4120.52	4665.11	4403.33	4404.84	4443.64	-
T3_positive	MW0121087	5-amino-1-(4-fluorophenyl)-1H-pyrazole-4-carbonitrile	Heterocyclic compounds	Heterocyclic compounds	C10H7FN4	203.072	202.065	0.428	[M+H]+	1.31375	4	0.7182	rp	51516-70-2	688685	-	-	-	B	2302.98	3873.77	3765.15	4882.51	1679.88	3109.09	4460.29	6111.15	5653.67	-
T3_positive	MW0168825	Bergapten	Heterocyclic compounds	Heterocyclic compounds	C12H8O4	217.044	216.042	5.581	[M+H]+	12.6571	1	0.7652	rp	484-20-8	2355	HMDB0030637	-	C01557	B	8670.15	7923.06	8167.11	7490.57	7408.31	7781.79	8699.38	8731.15	8744.59	-
T3_positive	MW0168983	Crotamiton	Heterocyclic compounds	Heterocyclic compounds	C13H17NO	226.12	203.131	6.4135	[M+Na]+	2.34776	2	0.7767	rp	483-63-6	688020	HMDB0014410	-	D01381	B	8113.34	9394.58	6956.76	7063.38	7100.73	1211.46	7331.17	7344.63	7328.6	-
T3_positive	MW0194013	N-Phthalyl-L-tryptophan	Heterocyclic compounds	Heterocyclic compounds	C19H14N2O4	335.103	334.095	3.2424	[M+H]+	4.11374	2	0.8846	rp	48208-26-0	702558	-	64811	-	B	139006	238599	270505	200765	314897	252551	247391	246594	247379	-
T3_positive	MW0126746	Tetrodotoxin	Heterocyclic compounds	Heterocyclic compounds	C11H17N3O8	342.094	319.102	3.0983	[M+Na]+	7.08546	2	0.7726	rp	4368-28-9	11174599	-	-	-	B	21179.2	18438.3	20746.3	14372.5	17279.8	19634.6	19316.6	19346.6	19316.8	-
T3_positive	MW0121799	6,11-Dihydro[1]benzothiopyrano[4,3-b]indole	Heterocyclic compounds	Indole and Its derivatives	C15H11NS	238.071	237.061	6.1613	[M+H]+	4.96306	2	0.7155	rp	4079-26-9	297589	-	45273	-	B	3227.45	3157.76	7741.51	2891.95	2543.69	2526.8	2785.11	2808.29	2790.79	-
T3_positive	MW0115455	Validamycin A	Heterocyclic compounds	Heterocyclic compounds	C20H35NO13	520.196	497.211	2.1221	[M+Na]+	4.58852	2	0.8139	rp	37248-47-8	443629	HMDB0036592	-	-	B	2502.64	3218.42	1532.41	1168.58	4009.72	3364.02	3473.7	3518.37	3486.34	-
T3_positive	MW0109584	Saxagliptin	Heterocyclic compounds	Heterocyclic compounds	C18H25N3O2	316.208	315.195	2.8285	[M+H]+	13.4142	1	0.803	rp	361442-04-8	11243969	HMDB0015634	-	-	B	6797.05	5427.09	5191.61	4538.68	5431.09	6779.15	4672.95	5140.08	5044.09	-
T3_positive	MW0168407	(3aR,4S,5R,6aS)-5-Hydroxy-4-(hydroxymethyl)hexahydro-2H-cyclopenta[b]furan-2-one	Heterocyclic compounds	Heterocyclic compounds	C8H12O4	173.076	172.074	1.9294	[M+H]+	10.3427	2	0.8622	rp	32233-40-2 | 54423-47-1	2724453	-	63035	-	B	2991.51	4194.63	3172.12	3469.8	4539.32	3394.32	11816.5	11884.1	11944.8	-
T3_positive	MW0139182	Ochratoxin A	Heterocyclic compounds	Heterocyclic compounds	C20H18ClNO6	404.09	403.082	5.2829	[M+H]+	2.12215	1	0.743	rp	303-47-9	442530	HMDB0029399	-	C09955	B	13340.7	13127	13347.5	11920.7	11011.9	12403.3	11706.8	11813.1	11710.1	ko04976
T3_positive	MW0123888	Ethidimuron	Heterocyclic compounds	Heterocyclic compounds	C7H12N4O3S2	265.047	264.035	0.4676	[M+H]+	0.20425	4	0.7449	rp	30043-49-3	91596	-	72834	C19092	B	7436.39	2268.84	5872.29	2778.01	6166.69	7366.29	5714.36	6999.44	6766	-
T3_positive	MW0124104	Fencamine	Heterocyclic compounds	Heterocyclic compounds	C20H28N6O2	385.23	384.227	3.3869	[M+H]+	1.56425	4	0.7124	rp	28947-50-4	115374	-	-	-	B	29711.6	29048.4	59995.8	39565.5	10683.9	26340.8	24859.6	24468.4	24838.8	-
T3_positive	MW0123533	Delorazepam	Heterocyclic compounds	Heterocyclic compounds	C15H10Cl2N2O	305.024	304.017	4.324	[M+H]+	0.475707	2	0.8943	rp	2894-67-9	17925	-	-	-	B	4445.06	4101.73	4076.52	3601.59	3615.35	4266.73	4034.64	3991.73	4035.6	-
T3_positive	MW0126505	Salsolinol	Heterocyclic compounds	Heterocyclic compounds	C10H13NO2	144.078	179.095	2.5531	[M+H-2H2O]+	6.40544	1	0.7234	rp	27740-96-1	91588	HMDB0042012	-	C09642	B	3586.14	4080.56	4706.73	3853.27	4646.21	5049.12	4420.9	4421.47	4396.18	-
T3_positive	MW0115946	(5-amino-1H-1,2,4-triazol-3-yl)methanol	Heterocyclic compounds	Heterocyclic compounds	C3H6N4O	137.044	114.054	1.753	[M+Na]+	3.88224	2	0.708	rp	27277-03-8	222697	-	96367	-	B	405279	271047	364345	245583	167200	309844	295708	295968	295707	-
T3_positive	MW0107973	Firefly luciferin	Heterocyclic compounds	Heterocyclic compounds	C11H8N2O3S2	281.003	279.998	4.3612	[M+H]+	5.08254	2	0.7851	rp	2591-17-5	92934	HMDB0029713	65823	C02740	A	648035	562743	629516	447654	538925	615658	592392	594669	594708	-
T3_positive	MW0117248	1-Phenyl-1,2,3,4-tetrahydroisoquinoline	Heterocyclic compounds	Heterocyclic compounds	C15H15N	232.107	209.12	0.5864	[M+Na]+	1.12375	4	0.7227	rp	22990-19-8	100137	-	-	-	B	25286.3	24241.1	29331.5	22490.3	22205.7	28765.9	23652.9	23435.6	23606.2	-
T3_positive	MEDP1817	2-Acetylpyrazine	Heterocyclic compounds	Heterocyclic compounds	C6H6N2O	123.053	122.048	0.9754	[M+H]+	4.42127	1	0.7297	rp	22047-25-2	30914	HMDB0031861	-	-	A	30209.4	24602.4	28658.3	4429.26	25798.9	28679.4	25936	25930.5	26131.1	-
T3_positive	MW0123116	Biotin-XX-Hydrazide	Heterocyclic compounds	Heterocyclic compounds	C22H40N6O4S	502.311	484.283	7.5725	[M+NH4]+	6.23007	2	0.7864	rp	211237-33-1	16760313	-	64812	-	B	420279	596523	543657	169985	249204	245041	204060	206031	193142	-
T3_positive	MW0124785	Mepiprazole	Heterocyclic compounds	Heterocyclic compounds	C16H21ClN4	305.154	304.146	2.8285	[M+H]+	2.77435	2	0.9534	rp	20326-12-9	71897	-	85228	-	B	2165.11	7082.36	2228.65	1988.66	8826.26	2212.98	19405.8	19838.2	20012.5	-
T3_positive	MW0126815	Tinidazole	Heterocyclic compounds	Heterocyclic compounds	C8H13N3O4S	230.062	247.063	4.4436	[M+H-H2O]+	6.82625	1	0.7037	rp	19387-91-8	5479	HMDB0015047	-	-	B	13086.9	11299.6	11848.7	10230.9	10986.1	11594.6	12031.3	12019.6	12026.5	-
T3_positive	MW0124660	Leucodopachrome	Heterocyclic compounds	Heterocyclic compounds	C9H9NO4	280.023	195.053	2.1155	[M+K+HCOOH]+	3.025	3	0.9127	rp	18766-67-1	161255	HMDB0004067	-	C05604	B	7282.7	7945.13	8004.92	2966.68	7890.88	4703.1	7389.28	7376.56	7426.58	ko00350,ko01100
T3_positive	MW0110787	1-(4-Chloro-1,2,5-thiadiazol-3-yl)piperidine	Heterocyclic compounds	Heterocyclic compounds	C7H10ClN3S	204.04	203.028	0.0661	[M+H]+	0.9895	4	0.7259	rp	173053-54-8	808966	-	-	-	B	3367.01	2509.67	2108.87	2404.72	1896.83	3613.67	2227.2	2312.42	2354.08	-
T3_positive	MW0157398	Terpendole E	Heterocyclic compounds	Heterocyclic compounds	C28H39NO3	438.293	437.293	7.2582	[M+H]+	13.5073	3	0.7541	rp	167427-23-8	10094631	-	-	C20536	B	99822.5	87587.5	123058	65388	87130.1	79977.9	67207.7	67488	66940.3	-
T3_positive	MW0126847	Trans-Zeatin	Heterocyclic compounds	Heterocyclic compounds	C10H13N5O	202.105	219.112	2.3677	[M+H-H2O]+	9.08952	2	0.754	rp	1637-39-4	449093	HMDB0012204	-	C00371	A	8376.66	6977.1	8209.35	6187.18	8245.33	8083.06	8030.53	8026.21	8030.56	ko01100
T3_positive	MW0122956	Atraton	Heterocyclic compounds	Heterocyclic compounds	C9H17N5O	212.142	211.143	6.2068	[M+H]+	24.8638	2	0.7207	rp	1610-17-9	15359	-	-	C19098	B	7127.85	930.88	6504.91	5624.59	5682.74	5899.05	6263.65	6270.03	6315.86	-
T3_positive	MW0107886	Lincomycin	Heterocyclic compounds	Heterocyclic compounds	C18H34N2O6S	407.219	406.214	3.4411	[M+H]+	3.29257	2	0.9217	rp	154-21-2	3000540	HMDB0015564	43230	C06812	B	2263.96	2637.64	1729.66	1365.74	1029.11	1933.25	1746.98	1623.59	1699.1	-
T3_positive	MEDP1060	Hydroxyquinoline	Heterocyclic compounds	Heterocyclic compounds	C9H7NO	146.058	145.053	2.562	[M+H]+	7.90521	1	0.7661	rp	148-24-3	1923	-	44006	C19434	B	15676.3	16186.1	17135.1	15346.6	18808.9	18929.4	19703.5	19710.2	19633.5	-
T3_positive	MW0126097	Phenol red	Heterocyclic compounds	Heterocyclic compounds	C19H14O5S	355.066	354.056	0.8105	[M+H]+	5.77674	3	0.7845	rp	143-74-8	4766	-	-	-	B	150122	170730	153996	168719	156585	76851.2	172844	175567	172502	-
T3_positive	MW0125005	Methoxybrassenin A	Heterocyclic compounds	Heterocyclic compounds	C13H16N2OS2	319.034	280.07	2.562	[M+K]+	1.4885	4	0.7141	rp	142449-74-9	101618767	HMDB0038635	-	-	B	2052.59	1289.51	2355.94	1487.85	1686.92	2224.84	1794.1	1859.91	1864.91	-
T3_positive	MW0146695	Rhodomycin B	Heterocyclic compounds	Heterocyclic compounds	C28H33NO10	628.188	543.21	7.8864	[M+K+HCOOH]+	14.0406	3	0.785	rp	1404-52-0	3037123	-	-	C18642	B	1.5526e+06	29039.3	107104	1.15755e+06	35595.9	47812.9	688208	660885	686013	-
T3_positive	MW0106734	Fumonisin B4	Heterocyclic compounds	Heterocyclic compounds	C34H59NO13	672.402	689.399	7.2582	[M+H-H2O]+	9.19234	3	0.7346	rp	136379-60-7	42608359	HMDB0040968	-	-	B	46557.2	44860.1	44779.5	36813	37056	36195.8	35994	35977	35638.1	-
T3_positive	MW0126145	Pindolol	Heterocyclic compounds	Heterocyclic compounds	C14H20N2O2	249.155	248.153	2.9185	[M+H]+	14.6332	2	0.903	rp	13523-86-9	4828	HMDB0015095	-	C07445	B	186194	171456	180300	160474	158508	172281	164051	164408	164053	-
T3_positive	MW0154305	Narcobarbital	Heterocyclic compounds	Heterocyclic compounds	C11H15BrN2O3	303.037	302.027	0.5864	[M+H]+	0.99125	4	0.7258	rp	125-55-3	18735	-	-	C17722	B	6820.17	5377.91	5461.31	4518.32	5694.3	7052.44	5918.57	5875.09	5833.18	-
T3_positive	MEDP0792	Pyrrolidine	Heterocyclic compounds	Heterocyclic compounds	C4H9N	72.0796	71.0735	0.6227	[M+H]+	3.03994	1	0.9313	rp	123-75-1	31268	HMDB0031641	-	-	A	11711	17111.6	18876.1	17016.7	13141.1	17253.7	10932.1	11933.1	12192.7	-
T3_positive	MW0107537	Indole	Heterocyclic compounds	Indole and Its derivatives	C8H7N	135.095	117.058	2.5441	[M+NH4]+	7.4268	1	0.7127	rp	120-72-9	798	HMDB0000738	286	C00463	A	1788.76	2100.41	2359.78	1809.44	2143.55	1616.58	2458.36	2452.84	2392.12	ko00380,ko00400,ko01100,ko04974
T3_positive	MEDP0686	2-Acetylfuran	Heterocyclic compounds	Heterocyclic compounds	C6H6O2	75.0246	110.037	3.3599	[M+H-2H2O]+	4.97705	1	0.7809	rp	1192-62-7	14505	HMDB0033127	-	-	B	5889.6	5648.39	6221.14	5236.01	5049.15	5328.42	3802.7	3616.86	3973.88	-
T3_positive	MW0108873	Nodularin	Heterocyclic compounds	Heterocyclic compounds	C41H60N8O10	825.444	824.443	7.6073	[M+H]+	9.81522	2	0.8915	rp	118399-22-7	14217092	-	45052	-	B	2517.76	2606.03	2943.4	1941.76	1990.3	2446.15	2327.05	2325.32	2299.03	-
T3_positive	MW0017121	Cinobufotalin	Heterocyclic compounds	Heterocyclic compounds	C26H34O7	423.215	458.231	3.229	[M+H-2H2O]+	4.47103	2	0.7869	rp	1108-68-5	259776	-	-	-	B	780.587	823.867	1366.91	291.089	561.073	727.131	1264.82	1298.25	1299.34	-
T3_positive	MW0126314	Pyridine	Heterocyclic compounds	Heterocyclic compounds	C5H5N	80.048	79.0422	1.7382	[M+H]+	3.16536	2	0.8073	rp	110-86-1	1049	HMDB0000926	5877	C00747	B	7706.75	6631.36	6877.17	5724.98	6589.94	7539.34	7050.81	7041.65	7070.18	-
T3_positive	MW0007578	Melamine	Heterocyclic compounds	Heterocyclic compounds	C3H6N6	149.058	126.065	2.1047	[M+Na]+	6.672	1	0.7689	rp	108-78-1	7955	HMDB0041922	-	C08737	B	23327.8	22005	24005.3	18015.7	24208.7	24447.8	23293	23289.8	23335.5	-
T3_positive	MW0126855	Triamiphos	Heterocyclic compounds	Heterocyclic compounds	C12H19N6OP	295.148	294.136	4.2856	[M+H]+	11.5982	2	0.7511	rp	1031-47-6	13943	-	-	C18927	B	4687.23	4587.32	4403.08	5008.73	6179.97	6133.25	5256.27	5283.6	5252.31	-
T3_positive	MW0124324	Huperzine A	Heterocyclic compounds	Heterocyclic compounds	C15H18N2O	243.154	242.142	5.1642	[M+H]+	10.6256	2	0.8255	rp	102518-79-6 | 120786-18-7 | 1369-64-8	854026	-	44100	-	B	3684.44	5251.72	5956.18	3982.49	4387.3	4793.86	8981.89	8952.8	8981.57	-
T3_positive	MW0117571	2-(4-Bromophenyl)-6-methylimidazo[1,2-a]pyridine	Heterocyclic compounds	Pyridine and pyridine derivatives	C14H11BrN2	287.024	286.011	0.5864	[M+H]+	1.10125	4	0.9732	rp	1023-01-4	837893	-	-	-	B	26574.2	25698.1	25685.2	21756.4	25172.4	4118.03	26248.6	26472.8	26814.9	-
T3_positive	MW0139231	Pachyrrhizin	Heterocyclic compounds	Heterocyclic compounds	C19H12O6	337.071	336.063	6.9052	[M+H]+	3.62215	2	0.9049	rp	10091-01-7	101277	HMDB0034049	-	-	B	3628.43	5055.57	4120.04	4162.32	4549.94	3441.03	16347	16568.8	16912.3	-
T3_positive	MW0123194	Caffeine	Heterocyclic compounds	Heterocyclic compounds	C8H10N4O2	233.049	194.08	3.369	[M+K]+	12.2478	1	0.7572	rp	-	2519	HMDB0001847	1455	C07481	A	2841.33	3329.7	3233.21	1199.5	1171.63	1848.09	1666.49	1849.07	2022.67	ko00232,ko01100
T3_positive	MW0123196	4-Chloro-2-nitrobenzylalcohol	Heterocyclic compounds	Heterocyclic compounds	C29H37N3O6	524.27	523.268	6.8148	[M+H]+	9.2288	2	0.785	rp	-	1959	HMDB0249542	-	-	A	4738.96	5349.67	6573.89	2816.33	4614.53	4826.71	5980.36	6014.97	6026.24	-
T3_positive	MW0139560	trans-Resveratrol 3-O-glucuronide	Heterocyclic compounds	Heterocyclic compounds	C20H20O9	427.101	404.111	4.7694	[M+Na]+	0.504747	2	0.7723	rp	-	5273285	HMDB0041782	-	-	B	5433.81	5364.73	6154.49	5547.11	5055.56	5450.85	5319.79	5322.56	5380.96	-
T3_positive	MW0139667	Schisandrin	Heterocyclic compounds	Heterocyclic compounds	C24H32O7	415.206	432.215	6.9425	[M+H-H2O]+	9.31364	2	0.7354	rp	-	23915	HMDB0258165	-	C17064	B	37228.1	33350.2	37032.9	22637.8	29863.1	28728.5	23346	23638.9	23568.3	-
T3_positive	MW0123754	Doramapimod	Heterocyclic compounds	Heterocyclic compounds	C31H37N5O3	528.301	527.29	6.8897	[M+H]+	12.4358	2	0.7314	rp	-	156422	HMDB0251587	-	-	B	21209.8	16916	20456.2	12391.1	14583.8	16451.7	15230.4	15461.9	15248.8	-
T3_positive	MW0125813	Nimustine	Heterocyclic compounds	Heterocyclic compounds	C9H13ClN6O2	272.075	272.079	4.4506	[M+]+	7.66892	2	0.726	rp	-	39214	HMDB0255613	-	-	B	27618.3	24642.1	26900.6	17754	25864.8	25954.2	26275.8	26143.7	26303.9	-
T3_positive	MW0124394	Imipraminoxide	Heterocyclic compounds	Heterocyclic compounds	C19H24N2O	297.201	296.189	6.7485	[M+H]+	13.8198	2	0.7166	rp	-	65589	HMDB0253434	-	-	B	4820.07	5350.7	5464.13	2573.47	4703.41	3577.2	4173.52	4249.12	4242.09	-
T3_positive	MW0122894	Apafant	Heterocyclic compounds	Heterocyclic compounds	C22H22ClN5O2S	456.12	455.118	4.6904	[M+H]+	9.60422	2	0.7157	rp	-	65889	HMDB0248503	-	-	B	4520.2	4090.16	5426.68	11302.1	4473.39	8974.39	5072.24	5026.76	5071.84	-
T3_positive	MW0126584	Splitomicin	Heterocyclic compounds	Heterocyclic compounds	C13H10O2	199.079	198.068	0.5864	[M+H]+	10.5981	2	0.7027	rp	-	5269	-	45476	-	B	4703.91	4804.39	5070.72	3908.15	4274.55	4555.48	4476.81	4508.39	4477.61	-
T3_positive	MW0121074	5-Acetylamino-6-formylamino-3-methyluracil	Heterocyclic compounds	Heterocyclic compounds	C8H10N4O4	271.041	226.07	1.9122	[M-H+2Na]+	0	3	0.8979	rp	-	108214	HMDB0011105	-	C16365	B	216.802	207.216	166.552	111.963	257.315	209.159	919.219	918.645	921.625	ko00232,ko01100
T3_positive	MW0156078	Progeldanamycin	Heterocyclic compounds	Heterocyclic compounds	C27H41NO6	476.3	475.293	6.9425	[M+H]+	2.71582	3	0.8748	rp	-	49787025	-	-	-	B	20174	19155	19394.2	20933.6	16763.9	12522.3	12857.6	12701.1	12558.4	-
T3_positive	MW0162115	4-Guanidinobutyrate	Heterocyclic compounds	Heterocyclic compounds	C5H11N3O2	184.044	145.085	0.5864	[M+K]+	10.325	3	0.7781	rp	-	25200642	-	-	-	B	489374	435264	557439	393558	389166	503891	470617	470614	471329	-
T3_positive	MW0146517	(7R,8Z)-bacteriochlorophyll b	Heterocyclic compounds	Heterocyclic compounds	C55H72MgN4O6	908.54	908.53	7.5899	[M+]+	8.06154	3	0.7433	rp	-	11953948	-	-	-	B	10444.6	10053.3	10661.9	7915.17	8466.42	8767.84	8557.83	8562.38	8455.14	-
T3_positive	MW0157223	Stigmatellin Y	Heterocyclic compounds	Heterocyclic compounds	C29H40O6	502.286	484.283	7.4336	[M+NH4]+	13.8813	3	0.7224	rp	-	5282078	-	-	C12150	B	3519.72	3476.85	3659.68	2290.05	1979.02	1112.22	1464.89	1473.01	1432.52	-
T3_positive	MW0153769	Methanophenazine	Heterocyclic compounds	Heterocyclic compounds	C37H50N2O	556.435	538.392	7.7526	[M+NH4]+	16.1159	3	0.7013	rp	-	5281992	-	-	-	B	74922.9	71629	69561.2	57023.7	56848.7	54402.9	57000.5	56866.2	56074.4	-
T3_positive	MW0143930	7a-Hydroxy-o-carbamoyl-deacetylcephalosporin C	Heterocyclic compounds	Heterocyclic compounds	C15H20N4O9S	455.084	432.095	0.5864	[M+Na]+	4.39924	4	0.9013	rp	-	441085	-	-	C06569	B	11844	11291	12217.5	9545.99	9740.55	11731.3	10845.2	10817.1	10794.1	ko01100
T3_positive	MW0120696	Bay 41-2272	Heterocyclic compounds	Heterocyclic compounds	C20H17FN6	399.113	360.15	1.4855	[M+K]+	0.318	4	0.7421	rp	-	9798973	HMDB0248891	-	-	B	3253.39	2255.9	3264.94	1979.23	3568.8	3219.37	2751.16	2627.78	2570.46	-
T3_positive	MW0125919	2-(1,3-Dioxo-1,3-dihydro-isoindol-2-yl)-3-(1H-indol-3-yl)-propionic acid	Heterocyclic compounds	Heterocyclic compounds	C19H14N2O4	352.128	334.095	5.0641	[M+NH4]+	0.8925	4	0.7282	rp	-	344265	HMDB0255797	-	-	B	1644.03	2758.94	2753.15	2421.08	4127.32	3331.14	2956.63	2918.69	2913.92	-
T3_positive	MW0151703	Imidiocarb	Heterocyclic compounds	Heterocyclic compounds	C19H20N6O	349.179	348.17	3.0084	[M+H]+	2.13157	2	0.9407	rp	-	-	-	96330	-	B	1680.96	6281.26	1782.85	1410.12	8630.78	1910.95	14606.4	14672.2	15117.4	-
T3_positive	MW0147818	-CP 47,497-d11	Heterocyclic compounds	Heterocyclic compounds	C21H23D11O2	312.322	329.325	6.5684	[M+H-H2O]+	3.81534	2	0.9061	rp	-	-	-	96644	-	B	11656.5	11328.8	10829.1	5719.58	8412.3	10143.5	10138.8	10117.6	9877.04	-
T3_positive	MW0144084	8-Isoquinoline methanamine(hydrochloride)	Heterocyclic compounds	Heterocyclic compounds	C11H11N	175.12	157.089	6.24	[M+NH4]+	5.98364	2	0.7478	rp	-	-	-	45036	-	B	46458.8	39954	40141.7	39251.7	34541.1	39344.4	40646.5	40800.4	40648.5	-
T3_positive	MW0122340	7-[3-(Dimethylamino)propoxy]-6-Methoxy-2-(4-Methyl-1,4-Diazepan-1-Yl)-N-(1-Methylpiperidin-4-Yl)quinazolin-4-Amine	Heterocyclic compounds	Heterocyclic compounds	C26H43N7O2	508.333	485.348	6.9514	[M+Na]+	7.86835	2	0.7266	rp	-	44251522	-	64826	-	B	57039.9	16144.2	20520	10363.6	10476.5	10562.2	11801.6	12088.6	11794.2	-
T3_negative	MW0122639	8H-Purin-8-one, 2-amino-1,6,7,9-tetrahydro-6-thioxo-	Heterocyclic compounds	Heterocyclic compounds	C5H5N5OS	235.024	183.022	1.5496	[M+Cl+NH3]-	17.175	3	0.8048	rp	88550-56-5	10442362	HMDB0060804	-	-	B	4331.71	2883.66	3247.07	9261.64	5352.86	7859.2	3318.08	3260.25	2993.81	-
T3_negative	MW0124512	Isosorbide dinitrate	Heterocyclic compounds	Heterocyclic compounds	C6H8N2O8	295.044	236.028	1.9133	[M+CH3COO]-	1.95345	3	0.8504	rp	87-33-2	6883	HMDB0015021	-	C07456	B	74899.7	66944.9	69343.1	82556	70112.1	64654.1	70530.7	70913.1	70665.3	-
T3_negative	MW0116383	1-Phthalazinamine, N-(3-chlorophenyl)-4-phenyl-	Heterocyclic compounds	Heterocyclic compounds	C20H14ClN3	330.084	331.088	4.4412	[M-H]-	4.91275	2	0.7976	rp	78351-75-4	1348	-	44526	-	B	8978.15	4464.91	9281.44	9228.84	8166.38	7487.1	8841.9	8808.21	8829.29	-
T3_negative	MW0123725	Dioxathion	Heterocyclic compounds	Heterocyclic compounds	C12H26O6P2S4	455.014	456.009	0.6858	[M-H]-	9.32978	4	0.8136	rp	78-34-2	6531	-	-	C17877	B	10495	11228.8	10538.1	9175.01	9177.47	9820.13	10139.6	10134.1	10031.1	-
T3_negative	MW0141898	2-(p-Methoxyphenyl)-3-(m-chlorophenyl)acrylonitrile	Heterocyclic compounds	Heterocyclic compounds	C16H12ClNO	328.079	269.061	2.0984	[M+CH3COO]-	0.0345825	3	0.7619	rp	7146-74-9	6141701	-	-	-	B	6455.62	6207.63	6340.81	5927.67	5665.77	6067.5	6594.3	6595.98	6505.03	-
T3_negative	MW0140128	(R)-3-(Pyrrolidin-2-yl)pyridine	Heterocyclic compounds	Pyridine and pyridine derivatives	C9H12N2	147.093	148.1	5.9363	[M-H]-	0.661178	3	0.7802	rp	7076-23-5	93047	-	-	-	B	13679.9	15134.5	11384.8	14878.6	9320.83	16308	11110.8	11269.1	11081.8	-
T3_negative	MW0123421	Coralyne chloride	Heterocyclic compounds	Heterocyclic compounds	C22H22ClNO4	398.115	399.124	1.4802	[M-H]-	0.66	4	0.7338	rp	6872-73-7 | 38989-38-7	23306	-	43948	-	B	6562.19	7011.14	5605.84	4849.92	1406.39	2941.11	4664.25	4374.95	4780.16	-
T3_negative	MW0168744	Amlexanox	Heterocyclic compounds	Heterocyclic compounds	C16H14N2O4	357.1	298.095	5.4341	[M+CH3COO]-	18.7493	1	0.7008	rp	68302-57-8	2161	HMDB0015160	-	-	B	2507.18	3344.61	3870.74	2172.48	3553.82	3411.78	3512.89	3645.69	3530.63	-
T3_negative	MW0158070	Triphenylethylene	Heterocyclic compounds	Heterocyclic compounds	C20H16	255.115	256.125	4.1979	[M-H]-	6.89592	3	0.7477	rp	58-72-0	6025	-	-	-	B	4615.58	4646.48	7095.28	5514.81	6533.75	6917.27	6442.16	6390.36	6544.06	-
T3_negative	MW0121776	6-Ethylmercaptopurine	Heterocyclic compounds	Heterocyclic compounds	C7H8N4S	239.061	180.047	8.448	[M+CH3COO]-	2.00212	2	0.7649	rp	5417-84-5	94971	-	-	-	B	105.516	1643.55	1220.63	267.735	783.8	282.732	6428.9	6581.81	6594.22	-
T3_negative	MW0120391	4-chloro-7-(4-chlorophenyl)-5-phenyl-7H-pyrrolo[2,3-d]pyrimidine	Heterocyclic compounds	Heterocyclic compounds	C18H11Cl2N3	338.033	339.033	2.0932	[M-H]-	4.993	4	0.8895	rp	507273-41-8	2049538	-	-	-	B	11995.2	13634.3	12465.8	11236.3	12019.5	11844.2	11157.7	11272	11311.8	-
T3_negative	MW0125950	Octyl 2-furoate	Heterocyclic compounds	Heterocyclic compounds	C13H20O3	223.135	224.141	6.548	[M-H]-	6.10767	3	0.709	rp	39251-88-2	62901	HMDB0037726	-	-	B	7876.06	5304.95	7004.82	5647.15	7590.77	6993.97	5193.4	5198.18	5271.89	-
T3_negative	MW0157948	Tolmetin sodium	Heterocyclic compounds	Heterocyclic compounds	C15H14NNaO3	278.083	279.087	2.3447	[M-H]-	2.17543	3	0.7194	rp	35711-34-3	23665411	-	-	C02328	B	9650.43	9730.71	2423.75	8224.37	7590.09	10602.5	9301.73	8993.5	9033.23	-
T3_negative	MW0118118	2-(2-(4-Bromophenyl)-6-methylpyrimidin-4-ylamino)ethanol	Heterocyclic compounds	Heterocyclic compounds	C13H14BrN3O	366.052	307.032	4.4412	[M+CH3COO]-	13.3622	1	0.7393	rp	330981-72-1	5332859	-	64774	-	B	44619.5	40268	41804.8	37431.3	36054.1	35627.8	38138.6	38278.4	38245.5	-
T3_negative	MW0168154	10-Formyltetrahydrofolic acid	Heterocyclic compounds	Pteridines and derivatives	C20H23N7O7	494.14	473.166	2.5172	[M+Na-2H]-	1.82134	3	0.9797	rp	2800-34-2	135398556	-	-	C00234	B	5797.47	6472.77	6272.4	5795.45	5484.22	4681.42	3191.91	3727.3	3553.68	ko00670,ko00970,ko01100,ko01200,ko01240,ko01523
T3_negative	MW0053477	Geniposide	Heterocyclic compounds	Heterocyclic compounds	C17H24O10	387.129	388.137	2.8678	[M-H]-	10.3873	1	0.7281	rp	24512-63-8 | 169799-41-1 | 27745-20-6	107848	-	-	C09781	B	10753.6	9527.42	9327.76	9105.39	8247.27	8934.52	9764.33	9855.33	9607.56	-
T3_negative	MW0126536	Semaxanib	Heterocyclic compounds	Heterocyclic compounds	C15H14N2O	237.1	238.111	5.6754	[M-H]-	7.76209	2	0.744	rp	204005-46-9 | 194413-58-6	5329098	-	45544	-	B	1309.8	2165.86	1868.5	1164.25	566.766	1243.68	1182.18	1232.9	1160.36	-
T3_negative	MW0125035	Methy Indole-3-Acetate	Heterocyclic compounds	Indole and Its derivatives	C11H11NO2	226.028	189.079	6.1623	[M+K-2H]-	0.3	3	0.9773	rp	1912-33-0	74706	HMDB0029738	-	C20635	B	647.054	651.505	455.7	1101.09	598.817	504.793	2107.34	2372.24	2209.79	-
T3_negative	MW0054404	Loganin	Heterocyclic compounds	Heterocyclic compounds	C17H26O10	411.128	390.153	2.6385	[M+Na-2H]-	0.729701	3	0.8229	rp	18524-94-2	87691	-	64938	C01433	B	6629.66	3513.39	4251.73	5299.73	4748.67	6129.19	3868.03	4008.97	3814.46	ko01100
T3_negative	MW0111042	Foramsulfuron	Heterocyclic compounds	Heterocyclic compounds	C17H20N6O7S	433.099	452.111	4.4369	[M-H2O-H]-	3.01482	2	0.7364	rp	173159-57-4	11419598	-	263526	-	B	40206.6	1105.16	35673.6	31041.4	30617.4	32448.9	31836.1	31927.8	31912.1	-
T3_negative	MW0118459	2-Chloroimidazo[1,2-a]pyridine-3-carbonitrile	Heterocyclic compounds	Heterocyclic compounds	C8H4ClN3	176.011	177.009	0.7685	[M-H]-	1.56275	4	0.7124	rp	131773-48-3	14963385	-	-	-	B	4213.96	4815.26	4110.59	3543.35	4837.57	5911.46	3983.6	3993	3439.28	-
T3_negative	MW0123150	Brassicanal B	Heterocyclic compounds	Heterocyclic compounds	C12H11NO2S	232.045	233.051	6.2721	[M-H]-	4.77485	3	0.8377	rp	126654-63-5	368117	HMDB0038592	-	-	B	19791.6	15071.9	16076.1	20980.9	15719.4	18028.2	13128.4	12643	13620.5	-
T3_negative	MW0107611	Kifunensine	Heterocyclic compounds	Heterocyclic compounds	C8H12N2O6	291.085	232.07	4.4062	[M+CH3COO]-	7.09195	2	0.7289	rp	109944-15-2	130611	-	45180	-	B	23991.9	4034.29	21199.5	18501.7	17077.2	6703.98	16309.4	16469.8	17026.6	-
T3_negative	MW0124723	Lumichrome	Heterocyclic compounds	Heterocyclic compounds	C12H10N4O2	241.073	242.08	4.2843	[M-H]-	0.449627	1	0.8165	rp	1086-80-2	5326566	-	-	C01727	A	2619.81	1974.52	2237.39	1576.45	1872.97	1817.82	3215.99	3244.77	3213.56	ko00740
T3_negative	MEDP1231	Folinic acid	Heterocyclic compounds	Pteridines and derivatives	C20H23N7O7	470.143	473.166	2.4653	[M-H]-	1.82836	1	0.8676	rp	-	135403648	HMDB0000121	-	C03479	A	6698.49	7462.87	8073.3	9738.42	14259.4	8463.32	9428.03	9575.64	9477.25	ko00670,ko01100
T3_negative	MW0117307	1-tert-butyl-3-(4-chlorophenyl)-1H-pyrazolo[3,4-d]pyrimidin-4-amine	Heterocyclic compounds	Heterocyclic compounds	C15H16ClN5	300.107	301.109	2.3533	[M-H]-	4.36215	2	0.7538	rp	-	4878	HMDB0244786	-	-	B	48578.4	43952.9	21772.7	46821.4	46724.5	51311.4	41125.4	39635.3	41296.8	-
T3_negative	MW0153767	Methanimidamide, N'-(1,6-dihydro-6-oxo-2-pyridinyl)-N,N-dipropyl-	Heterocyclic compounds	Heterocyclic compounds	C12H19N3O	220.148	221.153	6.3904	[M-H]-	8.42269	3	0.7878	rp	-	159470	HMDB0249850	-	-	B	4515.27	773.127	4225.74	6446.27	5891.69	8403.1	5917.54	6184.07	5985.53	-
T3_negative	MW0124071	5-Chloro-6'-methyl-3-(4-(methylsulfonyl)phenyl)-[2,3'-bipyridine] 1'-oxide	Heterocyclic compounds	Heterocyclic compounds	C18H15ClN2O3S	373.046	374.049	6.1973	[M-H]-	7.29555	3	0.7809	rp	-	44266508	HMDB0060926	-	-	B	1447.58	761.709	2026.45	2036.2	1693.36	1018.66	3266.13	3541.82	3511.14	-
T3_negative	MW0143921	7,8-dihydro-D-neopterin 2',3'-cyclic phosphate	Heterocyclic compounds	Pteridines and derivatives	C9H12N5O6P	362.051	317.053	2.1036	[M+HCOO]-	4.08427	3	0.7474	rp	-	135911932	-	-	C20567	B	9043.08	7030.71	4309.53	14885.9	1284.64	20202.4	18344.3	18265.7	18160	ko00790,ko01100
T3_negative	MW0010557	4-[(2R,3S)-4-(1,3-benzodioxol-5-yl)-2,3-dimethylbutyl]-2-[5-[(2R,3S)-4-(1,3-benzodioxol-5-yl)-2,3-dimethylbutyl]-2-hydroxy-3-methoxyphenyl]-6-methoxyphenol	Heterocyclic compounds	Heterocyclic compounds	C40H46O8	653.303	654.319	7.2827	[M-H]-	13.8619	3	0.7458	rp	-	102200628	HMDB0039454	-	-	B	16085.7	11393.1	21908.3	9291.97	2352.17	7224.91	7565.03	6626.75	7863.66	-
T3_negative	MW0122926	Artonin T	Heterocyclic compounds	Heterocyclic compounds	C26H26O7	449.174	450.168	6.6326	[M-H]-	21.3145	3	0.7091	rp	-	44258664	HMDB0029905	-	-	B	33315.8	40190.5	41458.2	17824.9	21186.3	25546.1	28993	29233.1	29922.5	-
T3_negative	MW0130710	2-amino-4-(3-hydroxyphenyl)-7-nitro-4H-chromene-3-carbonitrile	Heterocyclic compounds	Heterocyclic compounds	C16H11N3O4	344.039	309.075	2.0932	[M+Cl]-	0.11025	4	0.7473	rp	-	4188970	-	-	-	B	13060	12850	13088	12136	12165.7	13394.2	12476.1	12476.4	12448.5	-
T3_negative	MW0155031	PG(16:0/0:0)[U]	Heterocyclic compounds	Heterocyclic compounds	C22H45O9P	483.273	484.28	7.3167	[M-H]-	5.16745	2	0.7467	rp	-	-	-	40874	-	B	10179	10651.6	9090.48	8736.37	5829.9	7243.54	7326.84	7008.72	6927.15	-
T3_negative	MW0053576	(1R,2R,5R,8R,9S,10R)-11-methyl-6-methylidene-16-oxo-15-oxapentacyclo[9.3.2.15,8.01,10.02,8]heptadecane-9-carboxylic acid	Heterocyclic compounds	Heterocyclic compounds	C19H24O4	375.18	316.168	6.3904	[M+CH3COO]-	3.80754	2	0.745	rp	-	443456	-	-	-	B	51491.6	43096.8	55338.2	57993.2	49321.6	67339.9	58640.2	58912.9	59521.2	-
T3_negative	MW0143954	[(4S,6S,7R,8R)-7,13-dihydroxy-12-methyl-10,11-dioxo-2,5-diazatetracyclo[7.4.0.02,7.04,6]trideca-1(9),12-dien-8-yl]methyl carbamate	Heterocyclic compounds	Heterocyclic compounds	C14H15N3O6	356.06	321.096	2.3447	[M+Cl]-	0.21325	4	0.7447	rp	-	119057489	-	-	C21164	B	5989.64	4067.54	4978.79	4779.31	4952.41	5552.23	4824.71	4864.83	4840.52	-
T3_negative	MW0148875	Elastase Substrate IV,Colorimetric	Heterocyclic compounds	Heterocyclic compounds	C25H34N6O9	597.205	562.239	2.521	[M+Cl]-	0.485736	4	0.738	rp	-	-	-	-	-	B	3228.23	3747.01	5186.56	5345.15	693.644	5320.51	5434.78	5436.5	5392.05	-
HILIC_negative	MW0124447	Isatin	Heterocyclic compounds	Indole and Its derivatives	C8H5NO2	293.055	147.032	1.3699	[2M-H]-	8.21979	1	0.7385	hilic	91-56-5	7054	HMDB0061933	-	C11129	B	5355.73	1861.02	1603.27	1053.56	1285.22	4419.21	2397.11	2436.84	2443.14	-
HILIC_negative	MW0117304	1-Pyrroline-4-hydroxy-2-carboxylate	Heterocyclic compounds	Heterocyclic compounds	C5H7NO3	128.035	129.043	3.7477	[M-H]-	0.474574	1	0.7177	hilic	9054-77-7	440282	HMDB0002234	6564	C04282	A	100573	81689.9	73062.3	59554.3	67268.2	62311.4	64597.6	62884.3	61482.3	ko00470,ko01100
HILIC_negative	MW0148180	Debromohymenialdisine	Heterocyclic compounds	Heterocyclic compounds	C11H11N5O2	290.096	245.091	2.0581	[M+HCOO]-	21.0551	2	0.7777	hilic	75593-17-8 | 125118-55-0	135451156	-	-	C19897	B	8064.77	7225.99	7863.72	6303.08	6103.26	6504.06	6933.1	7048.77	6915.36	-
HILIC_negative	MEDP0514	Thiamine	Heterocyclic compounds	Heterocyclic compounds	C12H17N4OS+	264.1	265.112	3.6764	[M-H]-	11.2098	1	0.7659	hilic	70-16-6	1130	HMDB0000235	-	C00378	B	3834.85	3957.98	4224.3	3717.18	4536.42	3515.17	3927.37	3932.79	3928.82	ko00730,ko01100,ko01240,ko02010,ko04122,ko04977
HILIC_negative	MEDN0243	Pyridoxine	Heterocyclic compounds	Heterocyclic compounds	C8H11NO3	168.067	169.074	1.2719	[M-H]-	1.10821	1	0.8445	hilic	65-23-6	1054	HMDB0000239	-	C00314	A	23300.3	25122.1	30230.2	25722.4	27368.3	29127.1	27209.2	27207.6	27222.9	ko00750,ko01100,ko01240
HILIC_negative	MW0126060	Penciclovir	Heterocyclic compounds	Heterocyclic compounds	C10H15N5O3	505.228	253.118	1.2376	[2M-H]-	3.25266	1	0.8332	hilic	39809-25-1	135398748	HMDB0014444	-	C07417	B	8886.76	8595.67	8209.44	7552.63	7861.16	9565.37	9002.65	8961.76	8643.97	-
HILIC_negative	MW0142026	2,3-Diphenyl-3-(2-pyridinyl)acrylonitrile	Heterocyclic compounds	Heterocyclic compounds	C20H14N2	281.108	282.116	3.6764	[M-H]-	2.74504	3	0.76	hilic	39077-64-0	3003768	-	-	-	B	15586.4	17144.6	19062.2	15674.1	17733.7	17816.9	17035.7	17077.3	17272.5	-
HILIC_negative	MW0152118	3-[(1R,2S,6R)-5-oxo-7-oxabicyclo[4.1.0]hept-2-yl]-L-alanine	Heterocyclic compounds	Heterocyclic compounds	C9H13NO4	198.075	199.084	2.187	[M-H]-	6.80793	3	0.7541	hilic	28978-07-6	11769495	-	-	C20941	B	4982.26	4135.46	4337.89	7684.76	18147.5	18282.8	6240.43	5942.59	6508.57	ko01100
HILIC_negative	MW0012788	1-Deoxynojirimycin	Heterocyclic compounds	Heterocyclic compounds	C6H13NO4	198.049	163.084	3.267	[M+Cl]-	11.0616	1	0.7149	hilic	19130-96-2	29435	HMDB0035359	45343	-	B	4194.21	4336.83	4033.79	5842.89	6537.85	6774.94	4386.14	4419.5	4593.58	-
HILIC_negative	MW0138171	Alvocidib	Heterocyclic compounds	Heterocyclic compounds	C21H20ClNO5	801.196	401.103	2.9361	[2M-H]-	6.39925	2	0.7269	hilic	146426-40-6 | 131740-09-5	5287969	-	-	-	B	25251.8	16571.7	23567	9701.28	4254.97	4154.34	10995.6	11983.2	8768.93	-
HILIC_negative	MW0113923	Amidosulfuron	Heterocyclic compounds	Heterocyclic compounds	C9H15N5O7S2	368.037	369.041	4.2537	[M-H]-	10.0691	2	0.7342	hilic	120923-37-7	91777	-	68700	-	B	22157.5	24476	27463.6	34850.3	32911.3	31765.7	29798	29837.5	30341.3	-
HILIC_negative	MW0157504	Thicyofen	Heterocyclic compounds	Heterocyclic compounds	C8H5ClN2OS2	278.93	243.953	1.3788	[M+Cl]-	15.6615	3	0.761	hilic	116170-30-0	14880662	-	-	C18945	B	3967.01	3342.19	2562.49	5423.99	3052.17	3840.17	4413.2	3940.61	4394.91	-
HILIC_negative	MW0115368	Tilmicosin	Heterocyclic compounds	Heterocyclic compounds	C46H80N2O13	867.542	868.566	0.9168	[M-H]-	12.7119	4	0.7648	hilic	108050-54-0	5282521	-	-	-	B	17497.2	14713.5	18410.7	12022.9	11438.3	18484.6	16221	16014.7	16054.1	-
HILIC_negative	MEDL02250	3,3',4'5-Tetrahydroxystilbene	Heterocyclic compounds	Heterocyclic compounds	C14H12O4	279.04	244.074	1.539	[M+Cl]-	8.85953	1	0.8478	hilic	10083-24-6	667639	HMDB0004215	-	C05901	B	920784	742144	1.00071e+06	461020	360786	672056	673514	653410	644513	-
HILIC_negative	MW0110483	(3R,4S)-3-acetamido-4-(diaminomethylideneamino)-2-[(1R,2R)-1,2,3-trihydroxypropyl]-3,4-dihydro-2H-pyran-6-carboxylic acid	Heterocyclic compounds	Heterocyclic compounds	C12H20N4O7	313.114	332.133	3.5316	[M-H2O-H]-	9.95315	1	0.743	hilic	-	58753595	HMDB0014698	-	-	B	132532	134391	185432	234164	245912	231521	181280	176518	181834	-
HILIC_negative	MW0138147	(S)-2,3-Dihydro-5,7-dihydroxy-2-(4-hydroxyphenyl)-6,8-dimethyl-4-benzopyrone	Heterocyclic compounds	Heterocyclic compounds	C17H16O5	335.061	300.1	1.8899	[M+Cl]-	23.6366	1	0.7185	hilic	-	442396	HMDB0130571	-	C09734	B	9432.3	5872	8406.42	8299.62	5779.96	9999.18	7522.81	7453.72	7968.59	-
HILIC_negative	MW0151774	Iriomoteolide 1a	Heterocyclic compounds	Heterocyclic compounds	C29H46O7	487.305	506.324	1.1893	[M-H2O-H]-	3.46616	3	0.7098	hilic	-	16723501	-	-	C20009	B	8362.19	6915.6	7433.21	7853.46	7127.44	8139.71	6573.5	6463.76	6918.8	-
HILIC_negative	MW0155032	PG(16:0/18:1(9Z))[U]	Heterocyclic compounds	Heterocyclic compounds	C40H77O10P	747.521	748.525	0.8263	[M-H]-	3.74459	2	0.9769	hilic	-	-	-	40844	-	B	673910	695088	609467	581774	533828	692087	611912	612519	610786	-
T3_positive	MW0054287	Lathosterol	Hormones and hormone related compounds	Hormones and hormone related compounds	C27H46O	369.347	386.355	5.0745	[M+H-H2O]+	9.1137	2	0.7105	rp	80-99-9	65728	HMDB0001170	6052	C01189	A	20656.2	31187.7	72711.2	15690.5	41832.2	64052.8	39585.1	42859	42556.3	ko00100,ko01100
T3_positive	MW0155696	Prednisolone tebutate	Hormones and hormone related compounds	Hormones and hormone related compounds	C27H38O6	459.274	458.267	3.387	[M+H]+	1.83103	4	0.7063	rp	7681-14-3	93055	-	-	C08182	B	909.9	2189.52	382.081	1858.33	2581.3	458.367	3494.77	3595.77	3518.1	-
T3_positive	MW0102919	Triamcinolone acetonide	Hormones and hormone related compounds	Hormones and hormone related compounds	C24H31FO6	457.198	434.211	5.8711	[M+Na]+	4.62659	2	0.8847	rp	76-25-5	6436	-	2903	C08183	B	4710.84	4191.14	4204.66	3092.4	3277.25	4641.09	3971.35	4116.16	3943.9	-
T3_positive	MW0169458	Melatonin	Hormones and hormone related compounds	Hormones and hormone related compounds	C13H16N2O2	271.086	232.121	4.4577	[M+K]+	9.43467	1	0.7345	rp	73-31-4	896	HMDB0001389	73	C01598	A	2997.61	4736.2	4789.26	2410.44	1612.24	3872.95	3402.41	3531.65	3331.26	ko00380,ko01100,ko04080,ko04713
T3_positive	MW0052382	Cyclohexanol, 4-methyl-3-[(2E)-2-[(1R,3aS,7aR)-octahydro-7a-methyl-1-[(1R,2E,4R)-1,4,5-trimethyl-2-hexen-1-yl]-4H-inden-4-ylidene]ethylidene]-, (1S,3E,4S)-	Hormones and hormone related compounds	Hormones and hormone related compounds	C28H46O	381.348	398.355	6.6936	[M+H-H2O]+	8.2154	2	0.8529	rp	67-96-9	46173763	HMDB0015203	-	C06957	B	9491.25	8240.79	9425.88	4222.16	8713.76	8977.32	7360.92	7403.26	7403.66	-
T3_positive	MEDP0428	Cholesterol	Hormones and hormone related compounds	Hormones and hormone related compounds	C27H46O	369.348	386.355	5.4365	[M+H-H2O]+	5.72559	1	0.7954	rp	57-88-5	5997	HMDB0000067	-	C00187	A	132988	119039	150316	118709	142426	152027	132958	132774	135043	ko00100,ko00120,ko00140,ko01100,ko04913,ko04925,ko04927,ko04934,ko04975,ko04976,ko04977,ko04979,ko05200,ko05217,ko05417
T3_positive	MW0062186	Progesterone	Hormones and hormone related compounds	Hormones and hormone related compounds	C21H30O2	367.328	314.225	6.4934	[M+H-H2O]+	20.6784	1	0.7268	rp	57-83-0	5994	HMDB0001830	402	C00410	A	35912.5	34381.7	33886	27598	28051	34381.5	30059.8	30059.1	29983.2	ko00140,ko01100,ko04080,ko04114,ko04913,ko04914,ko04917,ko04925,ko04927,ko04934,ko05200,ko05207,ko05215,ko05224
T3_positive	MW0052655	Estradiol benzoate	Hormones and hormone related compounds	Hormones and hormone related compounds	C25H28O3	377.209	376.204	3.6111	[M+H]+	4.83108	1	0.819	rp	50-50-0	222757	-	43496	-	B	2998.58	2886.96	2310.94	976.655	2655.13	1837.16	3146.07	3114.91	3147.17	-
T3_positive	MEDN1407	Estriol	Hormones and hormone related compounds	Hormones and hormone related compounds	C18H24O3	253.163	288.173	5.1246	[M+H-2H2O]+	10.8583	1	0.7624	rp	50-27-1	5756	HMDB0000153	2581	C05141	A	7901.28	7480.06	8268.41	4988.01	7004.84	7386.73	7843.63	7787.73	7747.2	ko00140,ko01100
T3_positive	MW0012288	3-[(1r,2r,3r,5s)-3,5-Dihydroxy-2-(3-oxooctyl)cyclopentyl]propanoic acid	Hormones and hormone related compounds	Hormones and hormone related compounds	C16H28O5	323.179	300.194	6.474	[M+Na]+	9.18525	4	0.8159	rp	24379-94-0	168168	-	-	-	B	9089.08	16705.4	8503.93	11097.4	16992.9	12469.9	12298.5	12297.4	11968.3	-
T3_positive	MW0052657	Estradiol dipropionate	Hormones and hormone related compounds	Hormones and hormone related compounds	C24H32O4	385.23	384.23	0.9389	[M+H]+	18.2202	2	0.7586	rp	113-38-2	8225	-	-	-	B	12672.3	7234.64	11483.1	9027.97	9215.85	5481.1	9012.65	8596.26	8888.51	-
T3_positive	MW0194306	Prosta-5,13-dien-1-oic acid, 9,11-epidioxy-15-hydroperoxy-, (5Z,9alpha,11alpha,13E,15S)-	Hormones and hormone related compounds	Hormones and hormone related compounds	C20H32O6	391.203	368.22	6.26	[M+Na]+	11.4793	2	0.8193	rp	-	59950868	HMDB0003235	-	-	B	7512.38	7776.89	8140.97	6304.94	7227.19	7398.19	7545.34	7519.68	7475.31	-
T3_positive	MW0156129	Prostaglandin F2 Ethanolamide-d4	Hormones and hormone related compounds	Hormones and hormone related compounds	C22H35D4NO5	384.303	401.308	5.4741	[M+H-H2O]+	4.92902	2	0.828	rp	-	-	-	96576	-	B	20312.2	16921.4	19607.3	13335.7	14913.1	19788	18732.7	18601.1	18649.7	-
T3_positive	MW0141419	15(S)-15-methyl PGF2 ethyl amide	Hormones and hormone related compounds	Hormones and hormone related compounds	C23H41NO4	378.298	395.304	5.6744	[M+H-H2O]+	6.79671	2	0.7365	rp	-	-	-	64689	-	B	19660.2	17903.3	18702.9	13047.9	14186.7	19076.9	15960.1	14809.7	15119.9	-
T3_negative	MW0054179	Jasmonic acid	Hormones and hormone related compounds	Hormones and hormone related compounds	C12H18O3	255.125	210.126	6.3904	[M+HCOO]-	3.23512	1	0.7456	rp	59366-47-1	5281166	HMDB0032797	-	C08491	A	6181.14	4951.41	4971.12	928.836	3534.27	1849.3	4105.94	4077.57	4001.03	ko00592,ko01100
T3_negative	MEDP2140	19-Hydroxyandrost-4-ene-3,17-dione	Hormones and hormone related compounds	Hormones and hormone related compounds	C19H26O3	337.164	302.188	6.0059	[M+Cl]-	14.1037	2	0.8115	rp	510-64-5	252379	HMDB0003955	6990	C05290	B	8503.25	7528.1	8381.11	7831.3	7596.29	8392.18	7454.73	7596.77	7442.25	ko00140,ko01100
T3_negative	MW0054949	Methylprednisolone hemisuccinate	Hormones and hormone related compounds	Hormones and hormone related compounds	C26H34O8	473.219	474.225	6.6279	[M-H]-	3.29993	2	0.7662	rp	2921-57-5	16923	-	1235	-	B	324391	350412	318708	354802	209618	201141	309702	306223	308095	-
T3_negative	MW0049211	delta-Tocotrienol	Hormones and hormone related compounds	Hormones and hormone related compounds	C27H40O2	441.316	396.303	6.8229	[M+HCOO]-	23.7884	2	0.8288	rp	25612-59-3	5282350	HMDB0030008	-	C14156	A	16930.1	15565	16146.5	12129.8	7247.93	4983.18	12839.5	12807.1	13037.5	ko00130,ko01100
T3_negative	MW0012289	13,14-dihydro-15-keto-tetranor Prostaglandin F1beta	Hormones and hormone related compounds	Hormones and hormone related compounds	C16H28O5	299.187	300.194	6.4604	[M-H]-	2.20801	2	0.7602	rp	23015-45-4	52195782	-	-	-	B	14750.6	13103.1	13610.6	12790.7	12664.7	13206.7	12545.6	12487.6	12663	-
HILIC_negative	MW0017085	Cholesterol sulfate	Hormones and hormone related compounds	Hormones and hormone related compounds	C27H46O4S	465.302	466.312	0.7819	[M-H]-	3.51852	2	0.9626	hilic	1256-86-6	65076	HMDB0000653	5625	C18043	B	22408.7	6528.76	5889.46	5455.43	6503.8	16449.6	9099.86	10288.2	9905.2	ko00140,ko01100
T3_positive	MEDL02610	Glycycoumarin	Lignans and Coumarins	Coumarins	C21H20O6	369.127	368.126	6.3609	[M+H]+	12.8439	1	0.7483	rp	94805-82-0	5317756	HMDB0038225	-	-	B	20029.1	21834.1	21704.1	19193.1	19530	18765.9	19673.6	19672.3	19588.1	-
T3_positive	MW0139900	Umbelliferone	Lignans and Coumarins	Lignans	C9H6O3	163.036	162.032	5.5739	[M+H]+	7.45672	1	0.7065	rp	93-35-6	5281426	HMDB0029865	-	C09315	B	19570	17824.4	17504.9	16543.6	16328.7	17524.5	21098.3	21192.2	21111.5	-
T3_negative	MW0137751	Coumestrol	Lignans and Coumarins	Coumarins	C15H8O5	267.031	268.037	4.3014	[M-H]-	0.407906	1	0.8176	rp	479-13-0	5281707	HMDB0002326	-	C10205	B	10166.3	9803.28	9583.66	9002.8	7637.88	8318.17	17125.8	17280.7	17202.7	-
T3_positive	MEDL02151	3'-Adenylic acid	Nucleotide and Its metabolites	Nucleotide and Its metabolites	C10H14N5O7P	348.067	347.063	0.8612	[M+H]+	9.67273	1	0.9516	rp	84-21-9	41211	HMDB0003540	-	C01367	A	806143	946348	932284	934293	1.09234e+06	905994	943499	943785	947110	ko00230,ko01100
T3_positive	MW0103654	Riboprine	Nucleotide and Its metabolites	Nucleotide and Its metabolites	C15H21N5O4	450.035	335.159	2.1221	[M-2H+3K]+	0.777718	3	0.9216	rp	7724-76-7	24405	-	-	-	B	641.23	1626.93	1689	922.484	965.499	1011.06	1041.26	989.453	961.173	-
T3_positive	MW0124275	Guanine	Nucleotide and Its metabolites	Nucleotide and Its metabolites	C5H5N5O	152.055	151.049	1.4177	[M+H]+	2.78588	1	0.9726	rp	73-40-5 | 66224-61-1 | 66224-63-3 | 66224-64-4 | 71660-31-6 | 71660-36-1	135398634	HMDB0000132	-	C00242	A	60694.9	57719.1	60114.4	45690.5	47074.2	61486.4	52513.7	53620.7	52412.8	ko00230,ko01100,ko01232
T3_positive	MW0103560	Fialuridine	Nucleotide and Its metabolites	Nucleotide and Its metabolites	C9H10FIN2O5	372.964	371.962	1.1033	[M+H]+	11.9772	2	0.7081	rp	69123-98-4	50313	-	-	-	A	3123.81	4298.09	6256.74	3615.93	5836.84	3530.57	4692.11	4620.66	4707.25	-
T3_positive	MW0170017	Xanthine	Nucleotide and Its metabolites	Nucleotide and Its metabolites	C5H4N4O2	153.033	152.033	1.4426	[M+H]+	19.5002	1	0.7221	rp	69-89-6	1188	HMDB0000292	82	C00385	A	293488	267981	270215	214612	243509	269239	257514	258810	257006	ko00230,ko00232,ko01100,ko01232
T3_positive	MW0159863	Hypoxanthine	Nucleotide and Its metabolites	Nucleotide and Its metabolites	C5H4N4O	137.044	136.038	1.431	[M+H]+	2.85661	1	0.981	rp	68-94-0	790	HMDB0000157	83	C00262	A	343376	304522	325041	249743	219936	327775	290232	290485	289981	ko00230,ko01100,ko01232
T3_positive	MW0169988	Uracil	Nucleotide and Its metabolites	Nucleotide and Its metabolites	C4H4N2O2	113.033	112.027	1.4855	[M+H]+	4.55727	1	0.9326	rp	66-22-8	1174	HMDB0000300	258	C00106	A	30186.7	21322	28136.4	16058.1	12961.5	27637.8	23136.3	23111.6	23248.6	ko00240,ko00410,ko00770,ko01100,ko01232
T3_positive	MW0103508	Cyclic AMP	Nucleotide and Its metabolites	Nucleotide and Its metabolites	C10H12N5O6P	329.052	329.053	1.487	[M+]+	0.684098	2	0.7432	rp	60-92-4	6076	HMDB0000058	5120	C00575	A	1005.01	17431.7	24057.4	16593.6	12313.2	24407.6	16341.5	17003.2	15449.9	ko00230,ko01100,ko01522,ko04010,ko04014,ko04015,ko04020,ko04022,ko04024,ko04062,ko04072,ko04114,ko04211,ko04213,ko04261,ko04270,ko04340,ko04371,ko04540,ko04611,ko04670,ko04710,ko04713,ko04714,ko04720,ko04723,ko04724,ko04725,ko04726,ko04727,ko04728,ko04740,ko04742,ko04750,ko04910,ko04911,ko04912,ko04913,ko04914,ko04915,ko04916,ko04918,ko04919,ko04921,ko04922,ko04923,ko04924,ko04925,ko04926,ko04927…
T3_positive	MW0159913	Inosine	Nucleotide and Its metabolites	Nucleotide and Its metabolites	C10H12N4O5	269.085	268.081	1.753	[M+H]+	6.21869	1	0.9795	rp	58-63-9	135398641	HMDB0000195	-	C00294	A	96650.8	64739.8	90996.9	59293.9	39348.7	73534.4	71084.1	71231.4	71244.5	ko00230,ko01100,ko01232,ko02010
T3_positive	MW0168692	Adenosine	Nucleotide and Its metabolites	Nucleotide and Its metabolites	C10H13N5O4	268.101	267.097	1.9994	[M+H]+	5.03922	1	0.976	rp	58-61-7	60961	HMDB0000050	86	C00212	A	123085	91715.6	129528	98057.6	93060.7	100729	107682	107425	107086	ko00230,ko01100,ko01232,ko02010,ko04022,ko04024,ko04071,ko04080,ko04270,ko04923,ko04924,ko05012,ko05032,ko05034
T3_positive	MEDP0176	Thymidine	Nucleotide and Its metabolites	Nucleotide and Its metabolites	C10H14N2O5	265.076	242.09	2.1746	[M+Na]+	9.175	3	0.8572	rp	50-89-5	5789	HMDB0000273	3375	C00214	A	1855.38	1245.73	1257.41	1036.34	1418.07	2744.62	1376.46	1325.44	1382.59	ko00240,ko01100,ko01232
T3_positive	MEDN0428	N6-Succinyl Adenosine	Nucleotide and Its metabolites	Nucleotide and Its metabolites	C14H17N5O8	384.11	383.108	2.2974	[M+H]+	9.9912	1	0.9409	rp	4542-23-8	20849086	HMDB0000912	-	-	A	6423.12	6641.97	12453.6	4726.56	4096.82	7556.72	6783.55	6768.18	6809.81	-
T3_positive	MW0103320	2',3'-Cyclic UMP	Nucleotide and Its metabolites	Nucleotide and Its metabolites	C9H11N2O8P	375.022	306.025	1.3912	[M+Na+HCOOH]+	6.275	3	0.844	rp	40632-52-8	439715	HMDB0011640	-	C02355	A	2807.23	4653.13	3968.95	3146.49	1685.65	4916.27	1955.58	1978.6	1800.64	ko00240,ko01100
T3_positive	MW0103432	8-Hydroxyguanosine	Nucleotide and Its metabolites	Nucleotide and Its metabolites	C10H13N5O6	322.074	299.087	1.4777	[M+Na]+	6.89052	1	0.7708	rp	3868-31-3	135407175	HMDB0002044	44820	-	A	75344.5	66599.7	76072	64449.3	71945.2	84850.9	84307.8	84325.2	84606.9	-
T3_positive	MW0103620	N4-Acetylcytidine	Nucleotide and Its metabolites	Nucleotide and Its metabolites	C11H15N3O6	330.068	285.096	1.4172	[M-H+2Na]+	2.525	3	0.9496	rp	3768-18-1	107461	HMDB0005923	-	-	A	21301.8	22769.6	5589.06	19852.5	19437.2	20456.5	17702.7	17680.9	17188.8	-
T3_positive	MW0105588	Allopurinol	Nucleotide and Its metabolites	Nucleotide and Its metabolites	C5H4N4O	137.044	136.038	0.8676	[M+H]+	2.50462	1	0.8907	rp	315-30-0 | 180749-08-0 | 180749-06-8 | 73334-58-4 | 180749-09-1 | 180749-07-9 | 184789-03-5 | 291279-53-3	135401907	HMDB0014581	-	-	A	194152	129597	166813	85687.9	91282.6	154769	136490	136619	137276	-
T3_positive	MEDP0401	5'-Deoxy-5'-(Methylthio) Adenosine	Nucleotide and Its metabolites	Nucleotide and Its metabolites	C11H15N5O3S	298.093	297.09	2.8825	[M+H]+	6.50486	1	0.9673	rp	2457-80-9	439176	HMDB0001173	3425	C00170	A	35847.8	33926.4	40035.8	36948.7	44667.9	38450	46524.2	45651.1	45988.7	ko00270,ko01100
T3_positive	MW0126947	Vidarabine	Nucleotide and Its metabolites	Nucleotide and Its metabolites	C10H13N5O4	250.091	267.097	2.4559	[M+H-H2O]+	5.26638	1	0.9023	rp	24356-66-9	21704	HMDB0014340	-	C07195	B	15325.5	12014.9	13133.6	8383.01	10449	14785.5	12704.3	12712.3	12717.3	-
T3_positive	MW0103357	2'-O-Methyladenosine	Nucleotide and Its metabolites	Nucleotide and Its metabolites	C11H15N5O4	246.102	281.112	1.3912	[M+H-2H2O]+	8.17936	1	0.7498	rp	2140-79-6	102213	HMDB0004326	58235	-	A	30929	23466.4	27992.8	19919.9	10101.3	29521.1	23520.7	22700.5	22928.3	-
T3_positive	MEDP0461	2-Methylguanosine	Nucleotide and Its metabolites	Nucleotide and Its metabolites	C11H15N5O5	298.111	297.107	2.1047	[M+H]+	9.63265	1	0.7705	rp	2140-77-4	135501934	HMDB0005862	-	-	A	4150.15	2461.39	3323.15	2708.73	2452.78	4251.96	2938.76	2968.02	2952.3	-
T3_positive	MW0140755	dXTP	Nucleotide and Its metabolites	Nucleotide and Its metabolites	C10H15N4O14P3	546.948	507.98	0.6965	[M+K]+	10.3105	4	0.7986	rp	16541-23-4	439490	-	-	C01348	A	17239.9	19775.2	16761.5	23082.2	17579	18268.2	17919.7	18063.7	17923.9	-
T3_positive	MW0122632	7H-Purin-8-ol	Nucleotide and Its metabolites	Nucleotide and Its metabolites	C5H4N4O	119.032	136.038	1.753	[M+H-H2O]+	6.775	3	0.7383	rp	13230-97-2 | 51953-05-0	229771	HMDB0012182	-	-	A	2786.59	2345.94	2755.12	2089.49	1402.14	2628.71	2079.66	2132.47	2073.14	-
T3_positive	MW0103599	Inosine triphosphate	Nucleotide and Its metabolites	Nucleotide and Its metabolites	C10H15N4O14P3	530.975	507.98	0.6947	[M+Na]+	15.7904	1	0.7216	rp	132-06-9	135398643	HMDB0000189	-	C00081	A	328682	334028	337946	378009	319403	286583	325161	325538	326679	ko00230,ko01100,ko01232
T3_positive	MW0103577	Guanosine	Nucleotide and Its metabolites	Nucleotide and Its metabolites	C10H13N5O5	284.096	283.092	1.7709	[M+H]+	6.28023	1	0.9648	rp	118-00-3 | 26578-09-6 | 197227-95-5 | 103654-69-9 | 103654-70-2 | 146849-94-7 | 197227-93-3 | 202933-46-8 | 244769-87-7 | 247226-75-1 | 250586-91-5 | 250586-97-1 | 30747-23-0	135398635	-	-	C00387	A	58533.1	35214.5	57503.7	29361.1	20009.2	44186.9	40497	40410.6	40409.9	ko00230,ko01100,ko01232,ko02010
T3_positive	MWS-04-329g_p	Zebularine	Nucleotide and Its metabolites	Nucleotide and Its metabolites	C9H12N2O5	246.102	228.075	0.8476	[M+NH4]+	13.9616	1	0.7531	rp	-	100016	-	96475	-	B	43342.4	26143.8	10045.9	17314.2	29240.7	30574.5	30600.4	30566.6	30359.7	-
T3_positive	MW0103398	5-Fluorouridine monophosphate	Nucleotide and Its metabolites	Nucleotide and Its metabolites	C9H12FN2O9P	307.015	342.026	1.4489	[M+H-2H2O]+	5.10557	3	0.7403	rp	-	150856	HMDB0060397	-	C16634	B	20110.5	8082.78	19242.5	21067.7	17155	9757.24	12790.4	12853.4	13127.5	ko00983
T3_positive	MW0103414	6-Mercaptopurine ribonucleoside triphosphate	Nucleotide and Its metabolites	Nucleotide and Its metabolites	C10H15N4O13P3S	524.957	523.957	0.6929	[M+H]+	5.56995	4	0.8785	rp	-	3036942	HMDB0060411	-	C16617	B	24721.3	24250.8	23473.4	22658.1	20985.3	22346.7	22004.5	22006.5	22115.3	ko00983
T3_positive	MW0167997	Inosine 5_-Monophosphate	Nucleotide and Its metabolites	Nucleotide and Its metabolites	C10H11N4O8P-2	384.992	346.031	0.5864	[M+K]+	6.126	4	0.8681	rp	-	135398639	-	-	-	A	6653.02	6005.55	7298.15	4629.08	5982.01	6174.58	6185.89	6215.45	6215.82	-
T3_positive	MW0126803	Thioxanthine monophosphate	Nucleotide and Its metabolites	Nucleotide and Its metabolites	C5H5N4O5PS	282.01	263.972	5.9038	[M+NH4]+	2.0675	4	0.7009	rp	-	57322338	HMDB0060876	-	-	A	31726.4	25314.6	25812.1	22770.2	21075.7	21876.6	22025.5	22147	22116.9	-
T3_negative	MW0103343	2'-Deoxyguanosine	Nucleotide and Its metabolites	Nucleotide and Its metabolites	C10H13N5O4	302.066	267.097	1.9911	[M+Cl]-	1.375	3	0.9648	rp	961-07-9 | 663615-45-0 | 38559-49-8 | 116002-28-9 | 130434-96-7 | 197227-97-7 | 197227-99-9 | 244769-88-8 | 246137-64-4	135398592	-	-	C00330	B	11456.9	8251.4	11061	10626.3	4516.96	9012.02	9681.51	9439.05	9700.61	ko00230,ko01100,ko01232,ko02010
T3_negative	MW0103590	Guanosine-5'-monophosphate	Nucleotide and Its metabolites	Nucleotide and Its metabolites	C10H14N5O8P	362.052	363.058	0.8633	[M-H]-	4.97035	1	0.814	rp	85-32-5 | 128952-18-1 | 29593-02-0	135398631	HMDB0001397	-	C00144	A	389398	352825	358988	365344	331283	364937	340608	337918	340568	ko00230,ko01100,ko01232,ko01523,ko04022,ko04740,ko04742,ko04744
T3_negative	MW0114186	Deoxycytidine diphosphate	Nucleotide and Its metabolites	Nucleotide and Its metabolites	C9H15N3O10P2	386.017	387.023	0.8633	[M-H]-	2.34928	2	0.7069	rp	800-73-7	150855	HMDB0001245	6105	C00705	A	97875.2	88274.4	91695.8	84349.1	79549.6	78475.1	77418	76936.7	76566.8	ko00240,ko01100,ko01232
T3_negative	MW0103510	Cyclic guanosine monophosphate	Nucleotide and Its metabolites	Nucleotide and Its metabolites	C10H12N5O7P	344.04	345.047	0.5815	[M-H]-	1.12183	2	0.7393	rp	7665-99-8 | 40732-48-7	135398570	HMDB0001314	-	C00942	A	207519	186398	195246	189018	192097	204733	196232	196591	196595	ko00230,ko01100,ko04022,ko04270,ko04540,ko04611,ko04713,ko04714,ko04730,ko04740,ko04744,ko04921,ko04923,ko04924,ko04925,ko04970,ko04976
T3_negative	MW0160492	2-Amino-6-mercaptopurine riboside	Nucleotide and Its metabolites	Nucleotide and Its metabolites	C10H13N5O4S	298.07	299.069	1.8439	[M-H]-	21.7	3	0.7398	rp	7602-04-2 | 26017-62-9 | 32865-28-4 | 32976-84-4	3938248	-	-	-	A	3787.28	4885.97	725.131	3405.44	6356.93	5867.97	2950.57	2754.53	2969.15	-
T3_negative	pme3174	Cytidine-5'-monophosphate	Nucleotide and Its metabolites	Nucleotide and Its metabolites	C9H14N3O8P	322.046	323.052	0.8214	[M-H]-	2.26771	1	0.9287	rp	63-37-6	6131	HMDB0000095	-	C00055	A	62166.4	53973.5	34215.4	63232.5	67025.2	47730.3	64880.8	64485.2	64996.5	ko00240,ko01100,ko01232
T3_negative	MW0103478	Adenosine monophosphate	Nucleotide and Its metabolites	Nucleotide and Its metabolites	C10H14N5O7P	346.057	347.063	0.8453	[M-H]-	3.21328	1	0.8662	rp	61-19-8	6083	HMDB0000045	5111	C00020	A	773081	937173	818559	1.04124e+06	989267	814520	844934	845100	839274	ko00230,ko01100,ko01232,ko01240,ko01523,ko04022,ko04024,ko04068,ko04150,ko04151,ko04152,ko04211,ko04740,ko04742,ko04923,ko04924,ko04925,ko04927,ko04928,ko04934,ko05012,ko05022,ko05032
T3_negative	MW0103709	Uridine-5'-monophosphate	Nucleotide and Its metabolites	Nucleotide and Its metabolites	C9H13N2O9P	323.03	324.036	0.8431	[M-H]-	5.91354	1	0.9348	rp	58-97-9	6030	HMDB0000288	-	C00105	A	549893	500687	442835	539276	547639	509072	519937	517536	519985	ko00240,ko01100,ko01232,ko01240
T3_negative	MW0169991	Uridine	Nucleotide and Its metabolites	Nucleotide and Its metabolites	C9H12N2O6	243.064	244.07	1.4802	[M-H]-	4.20617	1	0.9252	rp	58-96-8	6029	HMDB0000296	90	C00299	A	286127	203081	274920	177797	136383	266500	214840	216576	216338	ko00240,ko01100,ko01232,ko02010
T3_negative	MW0103469	Adenosine-5'-diphosphate	Nucleotide and Its metabolites	Nucleotide and Its metabolites	C10H15N5O10P2	426.034	427.029	0.8633	[M-H]-	2.56845	1	0.7002	rp	58-64-0	6022	HMDB0001341	6175	C00008	A	29295.3	20444.7	18564.3	26268.5	22194.6	6487.15	10207.7	14394.1	15217.4	ko00190,ko00230,ko01100,ko01232,ko01240,ko04068,ko04080,ko04142,ko04152,ko04611,ko04714,ko04742,ko04924,ko05012,ko05014,ko05022
T3_negative	MW0103710	Uridine-diphosphate-N-acetylglucosamine	Nucleotide and Its metabolites	Nucleotide and Its metabolites	C17H27N3O17P2	606.076	607.082	1.4077	[M-H]-	6.1204	2	0.852	rp	528-04-1	445675	HMDB0000290	5281	C00043	A	1.13028e+06	913105	1.08622e+06	992219	863148	1.05655e+06	1.0012e+06	1.01726e+06	1.00902e+06	ko00520,ko00524,ko01100,ko01250,ko04931,ko05415
T3_negative	MW0103653	Ribavirin	Nucleotide and Its metabolites	Nucleotide and Its metabolites	C8H12N4O5	303.094	244.081	1.7225	[M+CH3COO]-	1.57214	1	0.7448	rp	36791-04-5	37542	HMDB0014949	-	-	B	4070.94	4946.63	3944.91	4231.53	4109.61	4814.12	4399.38	4486.93	4420.34	-
T3_negative	MW0103675	Thymidine-5'-phosphate	Nucleotide and Its metabolites	Nucleotide and Its metabolites	C10H15N2O8P	321.05	322.057	1.6359	[M-H]-	4.32821	1	0.841	rp	365-07-1	9700	HMDB0001227	6092	C00364	A	43102	42103.6	41554.5	43412.5	44649.7	49365.3	39871.9	40252	39416.8	ko00240,ko01100,ko01232,ko01523
T3_negative	MW0159852	Riboflavine 5'-phosphate	Nucleotide and Its metabolites	Nucleotide and Its metabolites	C17H21N4O9P	455.089	456.105	5.0529	[M-H]-	1.34925	4	0.7174	rp	26193-20-4	710	-	-	-	A	1240.29	2724.16	3386.57	3448.71	3509.91	3145.01	3296.09	3302.28	3370.38	-
T3_negative	MW0170020	Xanthosine	Nucleotide and Its metabolites	Nucleotide and Its metabolites	C10H12N4O6	283.069	284.076	1.948	[M-H]-	5.04964	1	0.8664	rp	146-80-5	64959	HMDB0000299	3408	C01762	A	3244.51	523.895	4012.35	707.373	2179.01	2065.93	2556.84	2434.38	2456.95	ko00230,ko00232,ko01100,ko01232,ko02010
T3_negative	MW0103561	Flavin mononucleotide	Nucleotide and Its metabolites	Nucleotide and Its metabolites	C17H21N4O9P	455.097	456.105	3.1296	[M-H]-	6.081	1	0.7926	rp	146-17-8	643976	HMDB0001520	6295	C00061	A	7692.65	7679.37	7247.28	6123.75	7555.75	5542.43	6854.67	6883.45	6893.55	ko00190,ko00740,ko01100,ko01240,ko04977
T3_negative	MW0103557	Flavin adenine dinucleotide	Nucleotide and Its metabolites	Nucleotide and Its metabolites	C27H33N9O15P2	784.151	785.157	2.8875	[M-H]-	2.49537	1	0.7406	rp	146-14-5	643975	HMDB0001248	6106	C00016	A	15324.5	13423.1	13774.9	12798.4	12286	16066.7	13973.5	14113	14108.2	ko00740,ko01100,ko01240,ko04977
T3_negative	MW0103434	8-Hydroxydeoxyguanosine 5'-monophosphate	Nucleotide and Its metabolites	Nucleotide and Its metabolites	C10H14N5O8P	362.052	363.058	1.4077	[M-H]-	5.35622	3	0.8189	rp	127027-50-3	135488904	HMDB0011670	-	C19968	B	521438	411746	496460	472591	383810	480729	464467	470702	466402	-
T3_negative	MW0103632	Nelarabine	Nucleotide and Its metabolites	Nucleotide and Its metabolites	C11H15N5O5	296.101	297.107	2.1036	[M-H]-	9.56084	1	0.7651	rp	121032-29-9	3011155	HMDB0015401	-	-	B	5382.2	2804.14	4097.38	4123.23	3148.55	5762.54	4059.9	4033.1	4028.8	-
T3_negative	MEDN0167	Purine	Nucleotide and Its metabolites	Nucleotide and Its metabolites	C5H4N4	160.062	120.044	1.4449	[M-H+CH3CN]-	0.05	3	0.9984	rp	120-73-0	1044	HMDB0001366	6193	C15587	A	2437.97	2596.45	2693.76	2000.16	1582.01	2878.87	2540.74	2531.95	2574.26	-
T3_negative	MW0103576	Glycinamide ribonucleotide	Nucleotide and Its metabolites	Nucleotide and Its metabolites	C7H15N2O8P	307.029	286.057	0.6858	[M+Na-2H]-	6.25	3	0.8464	rp	10074-18-7	160913	HMDB0002022	-	C03838	B	38760.2	37014.7	34109.9	30311.1	32879.5	32721.6	33867.1	33789.3	33651.6	ko00230,ko01100
T3_negative	MW0103593	9-[(3S,4S,5R)-3,4-dihydroxy-5-(hydroxymethyl)oxolan-2-yl]-1H-purin-6-one	Nucleotide and Its metabolites	Nucleotide and Its metabolites	C10H12N4O5	267.075	268.081	1.7398	[M-H]-	4.26544	1	0.9691	rp	-	135992491	HMDB0003040	-	-	A	989446	657342	924927	643823	416928	740113	725602	725587	723774	-
T3_negative	MEDN0161	Guanosine 3',5'-Cyclic Monophosphate	Nucleotide and Its metabolites	Nucleotide and Its metabolites	C10H11N5O7P-	404.063	344.04	2.1036	[M+CH3COO]-	5.81857	1	0.762	rp	-	135398570	HMDB0001314	-	-	A	19256	19070.4	20930	17496.3	18047.7	21081.3	18703.8	18619.7	18612.4	-
T3_negative	MW0161446	UDP-D-galactofuranose	Nucleotide and Its metabolites	Nucleotide and Its metabolites	C15H24N2O17P2	587.03	566.055	1.4265	[M+Na-2H]-	1.32872	3	0.8506	rp	-	11966195	-	-	-	A	2773.25	2822.95	2439.76	2740.86	2459.97	2710.61	3036.35	2922.13	3026.15	-
T3_negative	MW0103420	Thioinosine	Nucleotide and Its metabolites	Nucleotide and Its metabolites	C10H12N4O4S	303.055	284.058	1.4684	[M+F]-	3.325	3	0.84	rp	-	676166	HMDB0060791	-	-	A	34318.7	27506	31448.1	26661.8	24763.2	30221.1	27624.8	27683.9	27289.4	-
T3_negative	MW0142774	3'-Adenylylspectinomycin	Nucleotide and Its metabolites	Nucleotide and Its metabolites	C24H36N7O13P	660.212	661.211	2.1036	[M-H]-	7.75616	4	0.8393	rp	-	440052	-	-	C03580	A	10504.2	10520.3	5854.89	10338.7	12414.5	11435.2	7668.89	6796.66	7301.38	-
T3_negative	MW0165328	dTDP-3,4-didehydro-2,6-dideoxy-alpha-D-glucose(2-)	Nucleotide and Its metabolites	Nucleotide and Its metabolites	C16H20N2O14P2-2	561.004	526.039	0.577	[M+Cl]-	1.94377	4	0.9537	rp	-	86583511	-	-	-	B	2721.29	5191.19	3215.34	4084.17	4121.55	2727.44	3539.47	3761.5	3369.16	-
HILIC_negative	MEDP1592	Citicoline	Nucleotide and Its metabolites	Nucleotide and Its metabolites	C14H26N4O11P2	533.105	488.107	4.5357	[M+HCOO]-	0.0300773	1	0.9465	hilic	987-78-0	13804	HMDB0001413	3581	C00307	A	17951.9	10949.7	20762.5	12342.2	11199.9	14990	13920.9	13980.3	13857.2	ko00564,ko01100,ko05231
HILIC_negative	MEDN0068	S-(5-Adenosy)-L-Homocysteine	Nucleotide and Its metabolites	Nucleotide and Its metabolites	C14H20N6O5S	383.114	384.122	3.6041	[M-H]-	1.77756	1	0.9165	hilic	979-92-0	439155	HMDB0000939	296	C00021	A	7756.14	7895.33	10424.2	9637.58	8381.4	10070.5	9386.99	9396.03	9543.27	ko00270,ko01100,ko01230,ko01240,ko05208
HILIC_negative	MW0160014	2'-Deoxyinosine	Nucleotide and Its metabolites	Nucleotide and Its metabolites	C10H12N4O4	287.052	252.086	2.0212	[M+Cl]-	7.14905	1	0.7554	hilic	890-38-0	135398593	HMDB0000071	3383	C05512	A	6378.57	5007.9	5114.57	4743.43	3949.46	4674.68	5048.36	5057.36	4887.92	ko00230,ko01100,ko01232,ko02010
HILIC_negative	MEDN0609	Uridine triphosphate(UTP)	Nucleotide and Its metabolites	Nucleotide and Its metabolites	C9H15N2O15P3	520.911	483.969	4.0354	[M+K-2H]-	12.3628	3	0.7633	hilic	63-39-8	6133	HMDB0000285	-	C00075	A	3.54909e+06	3.13085e+06	3.35566e+06	2.86245e+06	2.82218e+06	3.11227e+06	3.11086e+06	3.11057e+06	3.10465e+06	ko00240,ko01100,ko01232,ko01240,ko04080
HILIC_negative	MEDN0152	Adenosine 5'-Diphosphate	Nucleotide and Its metabolites	Nucleotide and Its metabolites	C10H15N5O10P2	426.021	427.029	5.1882	[M-H]-	1.55301	1	0.9238	hilic	58-64-0	6022	HMDB0001341	6175	C00008	A	29192.8	30934.7	34427.1	39256.1	46297.4	28322.7	34222.3	34041.6	34037.9	ko00190,ko00230,ko01100,ko01232,ko01240,ko04068,ko04080,ko04142,ko04152,ko04611,ko04714,ko04742,ko04924,ko05012,ko05014,ko05022
HILIC_negative	MW0150660	Guanosine 5'-diphosphate sodium salt	Nucleotide and Its metabolites	Nucleotide and Its metabolites	C10H14N5NaO11P2	442.016	465.006	5.5795	[M-H]-	3.04284	2	0.9382	hilic	43139-22-6	136941668	-	43385	-	A	9699.28	9230.17	9192.43	9278.31	10799.8	9759.57	8467.13	8344.91	8223.04	-
HILIC_negative	MW0103521	Cmp-nana	Nucleotide and Its metabolites	Nucleotide and Its metabolites	C20H31N4O16P	613.141	614.147	4.3847	[M-H]-	0.41159	2	0.9305	hilic	3063-71-6	18292	-	434	-	A	12399.3	10857.9	11418.1	10369.4	11076.6	10979	10341.9	10187.1	10123.9	-
HILIC_negative	MW0103490	CDP-ethanolamine	Nucleotide and Its metabolites	Nucleotide and Its metabolites	C11H20N4O11P2	445.052	446.06	4.5723	[M-H]-	1.04038	2	0.7886	hilic	3036-18-8	123727	HMDB0001564	3538	C00570	B	18170.3	13378.2	14104.2	15023.5	13383.6	22924.8	15931.2	16072.3	15925.6	ko00564,ko01100
HILIC_negative	MADN0568	Uridine-5'-diphosphoglucuronic Acid (sodium salt hydrate)	Nucleotide and Its metabolites	Nucleotide and Its metabolites	C15H22N2O18P2	579.027	580.034	4.8544	[M-H]-	0.546537	1	0.8517	hilic	2616-64-0	-	HMDB00935	-	C00167	A	6621.06	3677.75	6866.62	6056.95	5996.67	6509.06	6301.68	6305.62	6309.17	ko00040,ko00053,ko00520,ko01100,ko01240,ko01250
HILIC_negative	MW0154249	N-Acetylpuromycin	Nucleotide and Its metabolites	Nucleotide and Its metabolites	C24H31N7O6	512.226	513.234	0.947	[M-H]-	4.31506	3	0.8329	hilic	22852-13-7	46173769	-	-	C07032	A	21914	21982.4	14503.9	30193.9	33940.9	37193.8	30334.8	30035	34177.4	ko01100
HILIC_negative	MW0144895	Allopurinol riboside	Nucleotide and Its metabolites	Nucleotide and Its metabolites	C10H12N4O5	249.063	268.081	1.3086	[M-H2O-H]-	9.89859	3	0.7686	hilic	16220-07-8	135407110	HMDB0000481	-	-	A	2448.7	1922.78	2769.49	2200.63	2307.42	2534.26	2445.48	2450.47	2385.26	-
HILIC_negative	MEDL00098	Pseudouridine	Nucleotide and Its metabolites	Nucleotide and Its metabolites	C9H12N2O6	243.062	244.07	2.1504	[M-H]-	0.568846	1	0.8822	hilic	1445-07-4	15047	HMDB0000767	5734	C02067	A	14261.7	10437.3	11980.2	10625.7	9632.28	14204.1	11013.2	10963.3	10653.3	ko00240,ko01100
HILIC_negative	MW0103600	Inosinic acid	Nucleotide and Its metabolites	Nucleotide and Its metabolites	C10H13N4O8P	347.041	348.047	4.5173	[M-H]-	0.749262	1	0.9484	hilic	131-99-7 | 30918-54-8 | 25249-22-3	135398640	HMDB0000175	-	C00130	A	279882	133069	100517	62181	60098.1	209728	128248	129393	128181	ko00230,ko01100,ko01232,ko01240,ko01523,ko04742
HILIC_negative	MW0014197	3-Methylxanthine	Nucleotide and Its metabolites	Nucleotide and Its metabolites	C6H6N4O2	165.041	166.049	0.7903	[M-H]-	0.391432	1	0.7396	hilic	1076-22-8	70639	HMDB0001886	2820	C16357	A	1651.57	3898.53	7323.28	2432.51	6307.19	5821.27	51993.5	51978.8	51369	ko00232,ko01100
HILIC_negative	MEDN1332	Adenosine-5'-Diphosphoglucose	Nucleotide and Its metabolites	Nucleotide and Its metabolites	C16H25N5O15P2	588.076	589.082	4.5999	[M-H]-	2.4301	1	0.8818	hilic	102129-65-7	16218835	-	-	-	A	5102.77	4710.27	4431.58	4022.06	4443.98	4251.23	4251.27	4252.59	4166.09	-
HILIC_negative	MW0159839	Cytarabine	Nucleotide and Its metabolites	Nucleotide and Its metabolites	C9H13N3O5	288.084	243.085	2.0578	[M+HCOO]-	3.24794	1	0.9159	hilic	-	596	HMDB0248553	-	-	B	2410	1856.94	1912.22	2687.74	2038.08	3713.02	1952.24	2008.17	1866.32	-
HILIC_negative	MEDN1087	UDP-D-galactose	Nucleotide and Its metabolites	Nucleotide and Its metabolites	C15H24N2O17P2	565.048	566.055	4.3847	[M-H]-	0.569588	1	0.8315	hilic	-	18068	-	-	-	A	36642.7	31282.4	31313	39354.4	39851.5	31763.3	33714.1	33957.6	33620.2	-
T3_positive	MW0111505	(S)-Methylmalonic acid semialdehyde	Organic acid and Its derivatives	Organic acid and Its derivatives	C4H6O3	125.024	102.032	1.6997	[M+Na]+	7.025	3	0.8408	rp	99043-16-0	5462303	HMDB0002217	6553	C06002	B	21114.3	18903.4	18353.6	17329.6	17399.9	3194.07	25182.6	27206.5	26852.4	ko00280,ko00640,ko01100
T3_positive	MW0126293	Pyrazinamide	Organic acid and Its derivatives	Organic acid and Its derivatives	C5H5N3O	124.056	123.043	1.7382	[M+H]+	13.408	1	0.8535	rp	98-96-4	1046	HMDB0014483	-	C01956	B	31454.2	27125	30531.7	23955.9	27830.8	30367.8	29022	28978.8	29021.8	-
T3_positive	MW0118898	4,6-Dihydroxy-2-mercaptopyrimidine	Organic acid and Its derivatives	Organic acid and Its derivatives	C4H4N2O2S	145.011	143.999	0.5854	[M+H]+	0.87025	4	0.9787	rp	956086-95-6 | 5658-01-5	1268265	-	-	-	B	391686	440352	373088	348678	344109	363156	392743	401691	400904	-
T3_positive	MW0132537	3,4,5-Trimethoxycinnamic acid	Organic acid and Its derivatives	Organic acid and Its derivatives	C12H14O5	239.086	238.084	4.2477	[M+H]+	12.4084	2	0.8564	rp	90-50-6	735755	HMDB0002511	6705	-	A	31622.6	40138.2	34367.9	26235.8	30913.7	35485.9	34933.6	34874.3	34893.7	-
T3_positive	MW0110590	1,2-bis(Heptanoylthio)glycerophosphocholine	Organic acid and Its derivatives	Phosphoric acids	C22H44NO6PS2	536.215	513.235	4.2848	[M+Na]+	16.2241	2	0.7399	rp	89019-63-6	57369907	-	63009	-	B	3210.24	2867.7	3091.03	3479.26	4779.85	5271.17	4380.86	4421.85	4423.34	-
T3_positive	MW0009449	Phthalic acid	Organic acid and Its derivatives	Organic acid and Its derivatives	C8H6O4	149.021	166.027	8.3758	[M+H-H2O]+	5.275	3	0.7865	rp	88-99-3	1017	HMDB0002107	6489	C01606	B	35212.3	12576.8	7565.81	20734.2	9596.69	1854.78	9320.55	6640.79	9698.33	ko01100,ko02010
T3_positive	MW0117285	Tert-butyl 4-((3-(pyridin-4-yl)-1,2,4-oxadiazol-5-yl)methoxy)piperidine-1-carboxylate	Organic acid and Its derivatives	Organic acid and Its derivatives	C18H24N4O4	360.176	360.18	7.2231	[M+]+	7.23867	2	0.7325	rp	857652-30-3	11462546	-	64655	-	B	15308.1	15045.9	15118.1	8362.7	10239.7	13905.4	6078.07	5987.32	5811.71	-
T3_positive	MW0114151	Cytidine 3'-monophosphate	Organic acid and Its derivatives	Organic acid and Its derivatives	C9H14N3O8P	324.055	323.052	1.3912	[M+H]+	8.4771	2	0.8938	rp	84-52-6	66535	HMDB0240312	-	C05822	B	8244.62	8014.45	7245.6	8215.41	8852.97	9140.52	8225.09	8321.15	8220.24	ko00240,ko01100
T3_positive	MW0013392	2-Aminohexadecanoic acid	Organic acid and Its derivatives	Organic acid and Its derivatives	C16H33NO2	272.256	271.251	5.5739	[M+H]+	6.8448	2	0.7722	rp	7769-79-1	409322	-	34491	-	B	224993	184805	211085	66366.6	86004.4	92122.9	150456	150726	150571	-
T3_positive	MW0014127	3-Hydroxytetradecanedioic acid	Organic acid and Its derivatives	Organic acid and Its derivatives	C14H26O5	257.169	274.178	5.6946	[M+H-H2O]+	15.2571	3	0.7003	rp	73179-89-2	20848956	HMDB0000394	5383	-	B	4002.31	3533.9	3266.11	3276.26	2882.05	3813.5	6660.59	6785.46	6629.16	-
T3_positive	MW0111236	Octadecylphosphocholine	Organic acid and Its derivatives	Phosphoric acids	C23H50NO4P	436.346	435.348	6.819	[M+H]+	9.63314	2	0.8335	rp	65956-63-0	125219	-	44313	-	B	84022.6	98835.9	84264.8	78107.2	90860.1	107498	13318.1	12317.4	13212.2	-
T3_positive	MW0105036	3-Hydroxybutyric acid	Organic acid and Its derivatives	Organic acid and Its derivatives	C4H8O3	180.973	104.047	1.691	[M-H+2K]+	15.65	3	0.7103	rp	625-72-9	441	HMDB0000011	-	C01089	A	56683.9	34757.6	35739.5	33614.7	13412.4	25641.1	67924.4	82106.4	81941.8	ko00650,ko01100,ko04024
T3_positive	MW0106189	Creatinine	Organic acid and Its derivatives	Organic acid and Its derivatives	C4H7N3O	114.062	113.059	0.8476	[M+H]+	11.0292	1	0.827	rp	60-27-5	588	HMDB0000562	8	C00791	A	36982.9	24563.4	39533.6	18889.3	27749.7	28271.6	28843.3	29148.1	28341.8	ko00330,ko01100
T3_positive	MADN0618	alpha-Hydroxyisobutyric acid	Organic acid and Its derivatives	Organic acid and Its derivatives	C4H8O3	105.046	104.047	1.5619	[M+H]+	19.4998	1	0.7199	rp	594-61-6	11671	HMDB0000729	3750	-	B	10250.1	9619.03	10314	8182.79	8077.42	8957.27	9338.67	9270.77	9268.71	-
T3_positive	MW0106711	Folic acid	Organic acid and Its derivatives	Organic acid and Its derivatives	C19H19N7O6	474.167	441.14	2.5086	[M+H]+	12.7845	1	0.8655	rp	59-30-3 | 112339-08-9 | 112339-32-9	135398658	HMDB0000121	-	C00504	A	3500.62	4941.88	6772.09	7464.31	8024.04	2540.93	6549.67	6532.99	6533.43	ko00670,ko00790,ko01100,ko01240,ko01523,ko04976,ko04977
T3_positive	MW0014136	3-Hydroxyvalproic acid	Organic acid and Its derivatives	Organic acid and Its derivatives	C8H16O3	125.094	160.11	4.3261	[M+H-2H2O]+	6.34856	1	0.7502	rp	58888-84-9	134459	HMDB0013899	-	C16651	B	2637.99	2551.39	3039.49	2625.98	2656.48	3454.36	2865.02	2882.6	2854.28	ko00982
T3_positive	MEDN0305	Creatine	Organic acid and Its derivatives	Organic acid and Its derivatives	C4H9N3O2	132.075	131.07	0.8105	[M+H]+	3.70533	1	0.9624	rp	57-00-1	586	HMDB0000064	7	C00300	A	298692	248019	289615	234487	262337	286550	266635	267455	266856	ko00260,ko00330,ko01100
T3_positive	MW0110047	Tropate	Organic acid and Its derivatives	Organic acid and Its derivatives	C9H10O3	131.047	166.063	2.1047	[M+H-2H2O]+	3.96445	1	0.7139	rp	552-63-6	10726	HMDB0062590	-	C01456	B	15014.8	14882	16732.2	12446.6	16629.5	16604.3	16026.9	16025	15981.7	-
T3_positive	MW0016248	Busulfan	Organic acid and Its derivatives	Sulfonic acids	C6H14O6S2	264.051	246.023	2.1068	[M+NH4]+	14.9319	1	0.7046	rp	55-98-1	2478	HMDB0015143	-	C06862	B	25594.8	23521.4	23986.8	20792.1	26080	25660.7	25625.2	25560.7	25531.6	-
T3_positive	MW0105415	Acetohydroxamic Acid	Organic acid and Its derivatives	Organic acid and Its derivatives	C2H5NO2	75.0247	75.032	1.0394	[M+]+	15.794	2	0.8384	rp	546-88-3	1990	HMDB0014691	-	C06808	A	3715.62	3588.86	3462.58	2693.52	2599.52	2081.77	3271.68	3255.86	3269.68	-
T3_positive	MW0126334	Pyridoxal phosphate	Organic acid and Its derivatives	Organic acid and Its derivatives	C8H10NO6P	248.029	247.025	1.8096	[M+H]+	8.84076	1	0.7954	rp	54-47-7	1051	HMDB0001491	6275	C00018	A	1460.02	2781.4	1326.29	2340.35	3830.88	3178.89	2909.6	2889.59	2895.04	ko00730,ko00750,ko01100,ko01240,ko04977
T3_positive	MW0126337	Pyridoxamine phosphate	Organic acid and Its derivatives	Organic acid and Its derivatives	C8H13N2O5P	249.062	248.056	1.9294	[M+H]+	7.43932	2	0.7264	rp	529-96-4	1053	HMDB0001555	-	C00647	A	1144.09	1458.75	1062.37	1131.32	1616.46	930.634	3517.73	3525.1	3604.89	ko00750,ko01100,ko04977
T3_positive	MW0106105	Carbamic acid	Organic acid and Its derivatives	Organic acid and Its derivatives	CH3NO2	79.0528	61.0164	2.1047	[M+NH4]+	6.3	3	0.8362	rp	463-77-4	277	HMDB0003551	6950	C01563	A	4155.08	4181.62	4451.93	3664.95	4218.27	4537.35	4087.03	4077.39	4105.78	ko00240,ko00910,ko01100
T3_positive	MW0152778	L-Rhamnulose 1-phosphate	Organic acid and Its derivatives	Organic acid and Its derivatives	C6H13O8P	329.001	244.035	6.5264	[M+K+HCOOH]+	5.325	3	0.7341	rp	444-09-7	6451998	-	-	C01131	B	75053.5	67423.6	80320	57186.1	62203.1	20967.2	58013.7	58783	58167.6	ko00051,ko01100
T3_positive	MW0113896	alpha-D-Galactosamine 1-phosphate	Organic acid and Its derivatives	Organic acid and Its derivatives	C6H14NO8P	298.011	259.046	2.6328	[M+K]+	6.33952	2	0.7596	rp	35946-79-3	493587	-	-	C22029	B	6827.18	6061.37	6111.65	4839.45	5840.49	6418.31	6809.31	6812.94	6728.45	ko00520,ko01100,ko01250
T3_positive	MW0052412	Dimethylallyl diphosphate	Organic acid and Its derivatives	Phosphoric acids	C5H12O7P2	268.996	246.006	0.6965	[M+Na]+	0.433	4	0.9893	rp	358-72-5	647	HMDB0001120	6016	C00235	A	5.30609e+06	4.77032e+06	5.03659e+06	4.49621e+06	4.41059e+06	3.8948e+06	4.46411e+06	4.4383e+06	4.45613e+06	ko00740,ko00900,ko01100
T3_positive	MW0142303	2-dehydro-3-deoxy-L-arabinonic acid	Organic acid and Its derivatives	Organic acid and Its derivatives	C5H8O5	149.042	148.037	7.3055	[M+H]+	4.925	3	0.7778	rp	3495-27-0	192781	-	-	C00684	B	313.174	507.522	304.844	313.563	317.691	224.697	1853.25	1858.73	1842.26	ko00053,ko01100
T3_positive	MW0138758	LEVULINIC ACID,3-BENZYLIDENYL-	Organic acid and Its derivatives	Organic acid and Its derivatives	C12H12O3	243.043	204.079	2.562	[M+K]+	0.0323875	2	0.7523	rp	26717-32-8	5951068	-	44382	-	B	2074.12	1010.5	1767.03	1809.02	2058.03	2249.82	2434.14	2535.59	2539.92	-
T3_positive	MW0147403	Chlormephos	Organic acid and Its derivatives	Organic acid and Its derivatives	C5H12ClO2PS2	256.962	233.97	5.8564	[M+Na]+	1.2855	4	0.7189	rp	24934-91-6	32739	-	-	C18686	B	905980	631080	896374	804874	673937	800442	694673	676349	699664	-
T3_positive	MEDP1615	Azobenzene-4-sulfonic acid	Organic acid and Its derivatives	Organic acid and Its derivatives	C12H10N2O3S	263.053	262.041	6.1787	[M+H]+	12.1631	1	0.7366	rp	2484-88-0	17210	-	-	-	B	2305.7	2082.17	1507.74	1998.57	1811.04	1064.58	5454.91	5482.67	5528.79	-
T3_positive	MW0130361	2,3,5-Trifluorocinnamic acid	Organic acid and Its derivatives	Organic acid and Its derivatives	C9H5F3O2	240.984	202.024	0.5864	[M+K]+	0.41025	4	0.9898	rp	237761-79-4	5708775	-	-	-	B	35023.3	33243.4	36236.5	28122.1	34036.1	5522.94	35772.3	35968.3	35797.2	-
T3_positive	MW0104240	1-Aminocyclopropane-1-carboxylic acid	Organic acid and Its derivatives	Organic acid and Its derivatives	C4H7NO2	102.053	101.048	0.8105	[M+H]+	4.7	3	0.8077	rp	22059-21-8	535	HMDB0036458	-	C01234	A	5008.57	4610.67	5129.63	3894.21	5034.15	5110.21	5310.53	5321.48	5423.27	ko00270,ko01100
T3_positive	MW0011583	(R)-2,3-Dihydroxy-isovalerate	Organic acid and Its derivatives	Organic acid and Its derivatives	C5H10O4	307.08	134.058	1.431	[2M+K]+	2.45	3	0.8592	rp	19451-56-0	440279	HMDB0012141	-	C04272	B	8755.66	8058.05	7206.02	6850.64	7526.07	8783.83	14424.2	14411.8	14196.8	ko00290,ko00770,ko01100,ko01210,ko01230
T3_positive	MW0114283	Diprogulic Acid	Organic acid and Its derivatives	Organic acid and Its derivatives	C12H18O7	275.107	274.105	2.604	[M+H]+	14.753	2	0.7749	rp	18467-77-1 | 68539-16-2	65420	-	-	C18825	B	220.414	1856.43	184.516	129.631	2091.83	1173.72	6421.04	6525.27	6619.34	-
T3_positive	MW0049159	D-Citramalic acid	Organic acid and Its derivatives	Organic acid and Its derivatives	C5H8O5	297.079	148.037	7.3111	[2M+H]+	7.1	3	0.7079	rp	1583974	439766	-	-	C02612	B	3207.94	4054.1	3139.36	2621.58	2790.61	1913.08	14431.6	14502.4	14417.2	ko00290,ko01100,ko01210,ko01230
T3_positive	MW0122826	Amfonelic acid	Organic acid and Its derivatives	Organic acid and Its derivatives	C18H16N2O3	309.127	308.116	6.385	[M+H]+	11.6526	2	0.8896	rp	15180-02-6	2137	-	-	-	B	38721.6	37227.3	41048	34984.2	33601.3	34290.5	34438.9	34413.8	34614.8	-
T3_positive	MW0150742	Protoheme	Organic acid and Its derivatives	Organic acid and Its derivatives	C34H32FeN4O4	617.172	616.177	6.26	[M+H]+	20.283	3	0.7197	rp	14875-96-8	26945	HMDB0003178	-	-	B	30928.8	30056.5	30607.9	20070.7	23035.1	27703.7	28102.6	28069.9	27735.1	-
T3_positive	MW0143730	6-(alpha-D-glucosaminyl)-1D-myo-inositol 1,2-cyclic phosphate	Organic acid and Its derivatives	Organic acid and Its derivatives	C12H22NO12P	404.09	403.088	4.985	[M+H]+	13.2925	3	0.7628	rp	140391-24-8	5461149	-	-	-	B	16463.9	16308.5	16824.6	14464.4	14138.3	15089.6	15090.8	15148.4	15121.9	-
T3_positive	MW0194047	3-Isopropylmalic acid	Organic acid and Its derivatives	Organic acid and Its derivatives	C7H12O5	218.105	176.069	2.335	[M+CH3CN+H]+	7.825	3	0.7667	rp	126576-14-5	5462261	HMDB0012156	-	C04411	B	375.596	699.51	239.78	179.857	818.03	416.206	1996.12	2001.29	2032.57	ko00290,ko01100,ko01210,ko01230
T3_positive	MW0105221	4-Hydroxy-2-oxoglutaric acid	Organic acid and Its derivatives	Organic acid and Its derivatives	C5H6O6	180.049	162.016	0.8615	[M+NH4]+	4.1	3	0.7755	rp	1187-99-1	599	HMDB0002070	6471	C01127	A	6519.57	6379.37	7821.97	6866.47	8250.4	3678.95	6120.06	6424.4	6174.72	ko00630,ko01100
T3_positive	MW0110487	Zoledronic acid	Organic acid and Its derivatives	Organic acid and Its derivatives	C5H10N2O7P2	254.99	271.996	0.9389	[M+H-H2O]+	5.49516	2	0.7788	rp	118072-93-8	68740	HMDB0014543	-	-	B	6082.92	4617.41	5704.66	1914.37	1440.79	3118.11	5323.34	5350.76	5306.59	-
T3_positive	MW0111483	(3r)-3-Hydroxy-5-{[(R)-Hydroxy(Phosphonooxy)phosphoryl]oxy}-3-Methylpentanoic Acid	Organic acid and Its derivatives	Organic acid and Its derivatives	C6H14O10P2	272.989	308.006	1.398	[M+H-2H2O]+	8.3	3	0.7341	rp	103025-21-4	439418	HMDB0001090	-	C01143	B	5555.09	5887.46	5510.15	4587.67	2594.28	4325	4238.65	4283.38	4252.79	ko00900,ko01100
T3_positive	MW0052724	Ethyl cinnamate	Organic acid and Its derivatives	Organic acid and Its derivatives	C11H12O2	245.075	176.084	6.474	[M+Na+HCOOH]+	8.05	3	0.7022	rp	103-36-6 | 4192-77-2	637758	HMDB0033834	66386	C06359	B	6968.51	5867.07	6769.25	5566.29	5226.54	8820.11	7016.96	7022.39	6962.61	-
T3_positive	MW0142015	3-Sulfopropanediol	Organic acid and Its derivatives	Organic acid and Its derivatives	C3H8O5S	139	156.009	7.5379	[M+H-H2O]+	14.1	3	0.8033	rp	10296-76-1	112025	-	-	C20797	B	5573.92	5294.69	6019.72	3657.6	3913.79	1366.63	2388.14	2431.51	2196	-
T3_positive	MW0009865	Terephthalic acid	Organic acid and Its derivatives	Organic acid and Its derivatives	C8H6O4	167.031	166.027	8.3758	[M+H]+	6.025	3	0.9284	rp	100-21-0	7489	HMDB0002428	6676	C06337	A	12380	7239.34	10423.9	7459.61	2949	978.076	3307.05	2803.85	3129.52	ko01100
T3_positive	MW0111256	Phosphocholine	Organic acid and Its derivatives	Phosphoric acids	C5H15NO4P+	184.071	184.074	0.8105	[M+]+	6.5993	1	0.9605	rp	-	1014	HMDB0001565	6326	C00588	A	33398	26819.9	31941.3	30957.8	37426.9	39687.2	35482.2	35587.3	36501	ko00564,ko01100,ko05231
T3_positive	MEDP1241	5-Hydroxy-2-oxo-4-ureido-2,5-dihydro-1H-imidazole-5-carboxylic acid ester	Organic acid and Its derivatives	Organic acid and Its derivatives	C5H6N4O5	203.041	202.034	0.5864	[M+H]+	1.19358	1	0.9424	rp	-	-	-	-	-	B	656921	599015	724981	559689	554117	697934	640285	638914	640301	-
T3_positive	MEDP1247	1-Deoxyvaleric-acid	Organic acid and Its derivatives	Organic acid and Its derivatives	C15H22O2	235.166	234.162	7.1531	[M+H]+	11.739	1	0.928	rp	-	71448993	-	-	C20404	B	6756.89	7068.11	6830.22	4514.8	5123.16	4149.16	4228.13	4238.57	4118.8	ko01100
T3_positive	MW0110917	N-(2-hydroxyethyl)icosanamide	Organic acid and Its derivatives	Organic acid and Its derivatives	C22H45NO2	356.349	355.345	6.5127	[M+H]+	9.13307	1	0.9086	rp	-	3787294	HMDB0248559	-	-	A	347575	283653	380015	158856	236046	329102	277154	277777	276890	-
T3_positive	MW0169484	Miltefosine	Organic acid and Its derivatives	Phosphoric acids	C21H46NO4P	408.318	407.316	7.0955	[M+H]+	12.6872	1	0.8646	rp	-	3599	HMDB0254735	-	-	B	7669.63	1403.36	8443.16	4881.3	8391.2	6987.13	4343.31	4551.93	4141.42	-
T3_positive	MW0014650	5,8,11,14-Eicosatetraynoic acid	Organic acid and Its derivatives	Organic acid and Its derivatives	C20H24O2	319.169	296.178	3.1343	[M+Na]+	5.21018	2	0.8929	rp	-	1780	HMDB0252124	-	-	A	3786.71	3593.34	2708.08	2473.07	3401.86	2551.96	3676.92	3697.8	3719.53	-
T3_positive	MW0053571	Gibberellin A79	Organic acid and Its derivatives	Organic acid and Its derivatives	C19H24O7	329.134	364.152	4.7694	[M+H-2H2O]+	7.46783	2	0.7657	rp	-	85366860	HMDB0039623	-	-	B	5212.74	4808.84	4799.77	3858.03	3339.42	4686.16	3990.16	3926.82	3948.34	-
T3_positive	MW0126295	Pyrazin-2-carboxylic acid	Organic acid and Its derivatives	Organic acid and Its derivatives	C5H4N2O2	124.022	124.027	1.7357	[M+]+	11.1214	2	0.7474	rp	-	1047	HMDB0059734	-	C19915	B	355203	368470	434503	249308	261815	312847	230812	243284	145522	-
T3_positive	MW0104699	Spermidic acid	Organic acid and Its derivatives	Organic acid and Its derivatives	C7H13NO4	176.089	175.084	0.5864	[M+H]+	7.26779	2	0.7471	rp	-	2572	HMDB0002201	6542	-	A	10685.4	12820.8	13284.6	11475.7	9217.49	12504.1	11495.7	11570.6	11555.9	-
T3_positive	MW0103960	[(E)-4-Methyl-5-Oxidanyl-Pent-3-Enyl]-Phosphonooxy-Phosphinic Acid	Organic acid and Its derivatives	Organic acid and Its derivatives	C6H14O7P2	278.057	260.022	3.5503	[M+NH4]+	1.18751	2	0.7388	rp	-	9901847	-	64798	-	B	3159.46	2030.34	3114.2	2444.43	2988.29	3461.22	3381.21	3394.88	3370.67	-
T3_positive	MW0168630	5,7-Dichlorokynurenic acid	Organic acid and Its derivatives	Organic acid and Its derivatives	C10H5Cl2NO3	256.962	256.965	1.9819	[M+]+	5.23392	2	0.7265	rp	-	1779	HMDB0246868	-	-	A	8245.98	14626.7	8503.44	10446	7783.05	27052.2	16757	24912.5	19604.5	-
T3_positive	MW0143628	5-Hydroxy-2,4-dioxopentanoic acid	Organic acid and Its derivatives	Organic acid and Its derivatives	C5H6O5	129.016	146.022	7.5379	[M+H-H2O]+	5.05	3	0.8596	rp	-	6326997	-	-	C05406	B	5535.42	5239.43	5864.72	3757.29	3747.06	2256.99	2552.64	2487.57	2409.92	-
T3_positive	MW0048987	Colubrinic acid	Organic acid and Its derivatives	Organic acid and Its derivatives	C30H46O4	453.339	470.34	3.7159	[M+H-H2O]+	3.73284	3	0.7396	rp	-	21672700	-	-	-	B	96003.4	89167.9	90738.9	87717.3	85283.9	92743.6	93288.8	93007.9	93233.2	-
T3_positive	MW0147450	Choline sulfate	Organic acid and Its derivatives	Phosphoric acids	C5H13NO4S	201.094	183.056	0.5864	[M+NH4]+	9.675	3	0.7282	rp	-	485	HMDB0250194	-	C00919	A	2558.91	2539.63	2937.47	2500.42	2348.07	3058.99	2781.28	2835.2	2832.02	ko02010
T3_positive	MW0128977	{[5-hydroxy-8-methyl-6-(2-methylpropanoyl)-2-oxo-4-phenyl-2H,8H-pyrano[2,3-f]chromen-8-yl]methoxy}sulfonic acid	Organic acid and Its derivatives	Organic acid and Its derivatives	C24H22O9S	487.105	486.099	7.7489	[M+H]+	0.471247	3	0.715	rp	-	131832542	HMDB0126098	-	-	B	959.187	798.345	1096.71	221.87	366.112	1254.65	4386.4	4317.29	4312.85	-
T3_positive	MW0143338	4-Hydroxy-2-oxohexanoic acid	Organic acid and Its derivatives	Organic acid and Its derivatives	C6H10O4	129.052	146.058	6.6349	[M+H-H2O]+	6.775	3	0.7137	rp	-	441164	-	-	C06762	B	2752.34	2299.23	12376.4	3146.16	3027.44	542.986	4617.52	4413.5	3772.15	ko01100
T3_positive	MW0102989	Tsugaric acid B	Organic acid and Its derivatives	Organic acid and Its derivatives	C33H52O5	511.388	528.381	7.2557	[M+H-H2O]+	13.5938	3	0.7084	rp	-	101936600	HMDB0031962	-	-	B	5611.32	3908.81	5061.7	6214.75	7790.2	5213.51	6389.15	6744.41	6987.47	-
T3_positive	MW0154862	Palythenic acid	Organic acid and Its derivatives	Organic acid and Its derivatives	C14H20N2O7	351.116	328.127	4.7694	[M+Na]+	0.12775	4	0.9968	rp	-	101016648	-	-	-	A	8665.68	8409.58	9018.03	7800.67	7706.22	8648.28	8737.05	8738.86	8705.77	-
T3_positive	MW0163352	deacetylcephalosporin C(1-)	Organic acid and Its derivatives	Organic acid and Its derivatives	C14H18N3O7S-	395.077	372.087	0.7329	[M+Na]+	1.13575	4	0.9724	rp	-	25246073	-	-	-	B	353338	326031	335269	279117	279498	289723	283699	283342	282429	-
T3_positive	MW0148356	Calcium galacturonate	Organic acid and Its derivatives	Phosphoric acids	C12H18CaO14	464.995	426.032	0.6045	[M+K]+	5.27216	4	0.8841	rp	-	46173918	-	-	C17477	B	5893.05	5911.58	6093.63	5196.34	6070.81	6324.89	5762.88	5838.82	5766.56	-
T3_positive	MW0106484	Disulfoton sulfone	Organic acid and Its derivatives	Sulfonic acids	C8H19O4PS3	329.003	306.018	0.6597	[M+Na]+	5.77075	4	0.8747	rp	-	17241	-	-	-	B	252775	224679	248820	186008	220669	241784	229647	229647	229856	-
T3_positive	MW0104428	2-[(7-hydroxy-1-oxo-1H-isochromen-3-yl)formamido]acetic acid	Organic acid and Its derivatives	Organic acid and Its derivatives	C12H9NO6	302.006	263.043	2.1047	[M+K]+	0.03225	4	0.7492	rp	-	131834943	HMDB0128639	-	-	B	3810.67	3796.74	3822.65	3088.21	3702.3	3490.82	3448.07	3412.3	3401.26	-
T3_positive	MW0113423	6-(2-Carboxyacetyl)oxy-3,4,5-trihydroxyoxane-2-carboxylic acid	Organic acid and Its derivatives	Organic acid and Its derivatives	C9H12O10	298.079	280.043	6.9071	[M+NH4]+	0.11675	4	0.7471	rp	-	77381530	HMDB0127482	-	-	B	2405.55	2250.36	2542.6	1809.4	1811.94	1822	7463.14	7597.99	7557.73	-
T3_positive	MW0145230	Arbutin 6-phosphate	Organic acid and Its derivatives	Organic acid and Its derivatives	C12H17O10P	353.064	352.056	1.753	[M+H]+	0.16525	4	0.7459	rp	-	440937	-	-	C06187	B	3996.88	2504.31	3406.2	2554.26	2014.85	3029.77	2348.45	2153.67	2299.44	ko00010
T3_positive	MW0162544	2-(2-Methylthioethyl)malate(2-)	Organic acid and Its derivatives	Organic acid and Its derivatives	C7H10O5S-2	224.062	206.025	6.9033	[M+NH4]+	0.2645	4	0.7434	rp	-	25203353	-	-	-	B	1307.15	966.533	1346	1117.52	1079.81	749.549	4568.55	4660.34	4576.44	-
T3_positive	MW0112598	3,4,5-Trihydroxy-6-[3-(4-methoxy-1-benzouran-5-yl)-3-oxopropanoyl]oxyoxane-2-carboxylic acid	Organic acid and Its derivatives	Organic acid and Its derivatives	C18H18O11	433.069	410.085	5.0641	[M+Na]+	14.4158	4	0.7432	rp	-	131835654	HMDB0129404	-	-	B	13465.8	18760.6	19944.2	16438.6	23179.5	19849.7	19899.1	19922.3	19948.8	-
T3_positive	MW0142541	2-Oxo-7-methylthioheptanoic acid	Organic acid and Its derivatives	Organic acid and Its derivatives	C8H14O3S	213.062	190.066	4.4577	[M+Na]+	1.58725	4	0.7119	rp	-	22266655	-	-	C17220	B	12190.5	8033.48	10875.4	3311.24	9081.51	2824.26	10620.2	10704.6	10142.4	ko01210
T3_positive	MW0013769	3,4,5-trihydroxy-6-[2-hydroxy-1-(1-oxo-1H-isochromen-3-yl)butoxy]oxane-2-carboxylic acid	Organic acid and Its derivatives	Organic acid and Its derivatives	C19H22O10	433.117	410.121	4.7694	[M+Na]+	1.71388	4	0.7089	rp	-	131836271	HMDB0130066	-	-	B	2201.69	2441.78	2152.84	2015.1	1585.01	2258.86	2348.21	2335.08	2334.81	-
T3_positive	MW0120134	4-[3-(4-Chlorophenyl)-1,2,4-oxadiazol-5-yl]butanoic acid	Organic acid and Its derivatives	Organic acid and Its derivatives	C12H11ClN2O3	305.01	266.046	1.5619	[M+K]+	2.05	4	0.7013	rp	-	731146	HMDB0246675	-	-	B	4432.41	4040.85	4074.23	3453.39	3279.57	3098.57	3085.99	3110.77	3102.97	-
T3_positive	MW0110180	Tumonoic acid I	Organic acid and Its derivatives	Organic acid and Its derivatives	C27H47NO7	498.339	497.335	7.1355	[M+H]+	8.76637	2	0.765	rp	-	25058102	-	65437	-	B	64389.5	48715.2	72363.2	42139.6	49843.5	50884.8	44027.5	43735.4	43643.9	-
T3_positive	MW0148486	DIHYDRO--TUBAIC ACID	Organic acid and Its derivatives	Organic acid and Its derivatives	C13H16O4	237.111	236.105	1.5053	[M+H]+	3.86211	2	0.7383	rp	-	-	-	44213	-	B	11445.7	10660.9	10115	9262.88	9335.98	9102.86	10103.4	10103.6	10081.8	-
T3_positive	MW0110174	Tumonoic acid A	Organic acid and Its derivatives	Organic acid and Its derivatives	C19H33NO4	340.255	339.241	3.405	[M+H]+	15.9006	2	0.7176	rp	-	10854587	-	65396	-	B	2610.05	2409.41	2676.59	2001.32	2304.05	2594.74	1595.45	1680.74	1794.58	-
T3_positive	MW0105310	5-Hydroxy-2-oxo-4-ureido-2,5-dihydro-1H-imidazole-5-carboxylate	Organic acid and Its derivatives	Organic acid and Its derivatives	C5H6N4O5	247.001	202.034	0.6561	[M-H+2Na]+	10.05	3	0.7811	rp	-	443736	HMDB0301917	-	C12248	B	108970	92255.5	101802	78110.2	94740.6	100789	96612.3	96848.3	96861.1	ko00230,ko01100
T3_positive	MW0063227	PtdIns-(4)-P1(1,2-dihexanoyl)	Organic acid and Its derivatives	Sulfonic acids	C21H40O16P2	611.177	610.179	7.6248	[M+H]+	1.37746	4	0.7167	rp	-	53394541	-	45079	-	B	81936.5	124685	65850.3	1695.15	45666.9	32423.5	14748.3	19535.2	18539.9	-
T3_negative	MW0103076	Valproic acid	Organic acid and Its derivatives	Organic acid and Its derivatives	C8H16O2	143.109	144.115	6.2587	[M-H]-	0.625623	1	0.9403	rp	99-66-1	3121	HMDB0001877	2986	C07185	B	13880.8	11334.5	12398	9671.66	31667	11091.7	25962.9	27842.7	24516	ko00982,ko04976
T3_negative	MW0005090	4-Hydroxybenzenesulfonic acid	Organic acid and Its derivatives	Sulfonic acids	C6H6O4S	172.992	173.999	3.4889	[M-H]-	0.576452	1	0.9523	rp	98-67-9	4765	-	34512	-	B	18207.4	15955.4	16861.2	13866.7	14183.6	16685.6	15651.1	15662.5	15730.8	-
T3_negative	MW0116945	1-ethyl-6-thien-2-yl-1H-pyrazolo[3,4-b]pyridine-4-carboxylic acid	Organic acid and Its derivatives	Organic acid and Its derivatives	C13H11N3O2S	272.059	273.057	4.4412	[M-H]-	2.0065	4	0.7023	rp	923919-56-6	16227451	-	-	-	B	2519.57	1356.01	2238.58	2003.31	2410.1	2073.81	2132.63	2072.35	2133.13	-
T3_negative	MW0109790	Hydroxypropanedioic acid	Organic acid and Its derivatives	Organic acid and Its derivatives	C3H4O5	179.015	120.006	1.8178	[M+CH3COO]-	10.8911	2	0.8175	rp	80-69-3	45	HMDB0035227	-	C02287	A	821269	1.02132e+06	841669	661404	688089	870795	464957	476499	317601	-
T3_negative	MW0010166	Phosphoric acid	Organic acid and Its derivatives	Organic acid and Its derivatives	H3O4P	96.9614	97.9769	1.4141	[M-H]-	22.6336	2	0.8246	rp	7664-38-2	-	HMDB0000973	-	C00009	B	72023.7	51274.1	83026.6	62148	60427.7	72338.1	74425.9	74629.1	75501.4	ko00190,ko02010,ko04928,ko04978,ko05012,ko05022
T3_negative	MEDN0479	4-Methylvaleric Acid	Organic acid and Its derivatives	Organic acid and Its derivatives	C6H12O2	115.077	116.084	5.154	[M-H]-	2.64003	1	0.8059	rp	646-07-1	12587	HMDB0000689	4191	-	A	12242.4	10748.7	8732.86	6723.17	8137.61	9025.23	12923	12799.5	12927.8	-
T3_negative	MW0126804	3',5'-Cyclic dtmp	Organic acid and Its derivatives	Organic acid and Its derivatives	C10H13N2O7P	363.054	304.046	1.4077	[M+CH3COO]-	14.5788	2	0.7572	rp	6453-60-7	12359154	-	-	-	B	74090	55270.3	66088.6	62786.1	52084.5	66576.3	62776.6	63712.9	62991.9	-
T3_negative	MW0014105	3-Hydroxynonyl acetate	Organic acid and Its derivatives	Organic acid and Its derivatives	C11H22O3	201.15	202.157	5.432	[M-H]-	3.10892	3	0.7683	rp	60826-15-5	234237	HMDB0032443	-	-	B	3548.77	2536.29	2801.32	2986.14	3277.47	2451.84	2916.72	2979.18	2951.71	-
T3_negative	MW0015566	3-[4-Methyl-1-(2-methylpropanoyl)-3-oxocyclohexyl]butanoic acid	Organic acid and Its derivatives	Organic acid and Its derivatives	C15H24O4	327.186	268.168	6.3376	[M+CH3COO]-	9.99224	2	0.7335	rp	55700-39-5	15558301	HMDB0038165	-	-	B	30937.3	28557.9	32401.6	24534.7	27758.9	28280.6	25465.6	25517.6	25466	-
T3_negative	MEDN1360	4-Methyloctanoic acid	Organic acid and Its derivatives	Organic acid and Its derivatives	C9H18O2	157.124	158.131	6.661	[M-H]-	2.7126	1	0.8358	rp	54947-74-9	62089	HMDB0031557	-	-	B	170025	149162	151770	154878	132355	138696	176428	176526	178596	-
T3_negative	MW0127546	Pirinixic acid	Organic acid and Its derivatives	Organic acid and Its derivatives	C14H14ClN3O2S	382.075	323.05	2.5172	[M+CH3COO]-	22.8732	2	0.7487	rp	50892-23-4	5694	-	43447	C75388	B	11017.7	9643.88	4048.75	6720.01	7657.71	8839.57	4747.93	4289.37	3351.26	-
T3_negative	MEDP0902	12-Hydroxydodecanoic acid	Organic acid and Its derivatives	Organic acid and Its derivatives	C12H24O3	215.166	216.173	5.8667	[M-H]-	1.85477	1	0.963	rp	505-95-3	79034	HMDB0002059	6465	C08317	A	27346	25762.3	24840.3	21320.1	21942.7	22928.1	23445	23464.5	23633.2	-
T3_negative	MW0063692	Suberic acid	Organic acid and Its derivatives	Organic acid and Its derivatives	C8H14O4	173.083	174.089	3.7588	[M-H]-	0.539789	1	0.9616	rp	505-48-6	10457	HMDB0000893	4243	C08278	A	24323.1	21495.2	21456.3	19727.7	20204.7	22362.3	21613.7	21712.3	21552.3	-
T3_negative	MW0000271	Guvacine	Organic acid and Its derivatives	Organic acid and Its derivatives	C6H9NO2	126.062	127.063	4.4413	[M-H]-	13.1405	3	0.8859	rp	498-96-4	3532	-	44304	C10149	B	466333	417174	431694	385628	379174	422934	411577	411409	410645	-
T3_negative	MW0138750	Lecanoric acid	Organic acid and Its derivatives	Organic acid and Its derivatives	C16H14O7	353.049	318.074	5.832	[M+Cl]-	14.386	2	0.7466	rp	480-56-8	99613	-	41021	C02868	B	21893.5	32888.3	26048.5	21294.9	22208.1	44213	37441.4	40238.3	35539.3	-
T3_negative	MW0125631	Nalidixic acid	Organic acid and Its derivatives	Organic acid and Its derivatives	C12H12N2O3	231.071	232.085	3.5755	[M-H]-	21.82	1	0.7435	rp	389-08-2	4421	HMDB0014917	-	C05079	B	12734.3	39409.5	39707.4	36448.7	36096.9	25836.4	32516.6	33734	34236.9	-
T3_negative	MW0106363	Daucic acid	Organic acid and Its derivatives	Organic acid and Its derivatives	C7H8O7	263.036	204.027	1.8265	[M+CH3COO]-	8.51002	3	0.735	rp	34098-52-7	5316316	HMDB0031665	-	-	B	444541	399445	412765	279849	347124	353586	387602	387599	387129	-
T3_negative	MW0049167	FFA(10:0)	Organic acid and Its derivatives	Organic acid and Its derivatives	C10H20O2	171.14	172.146	6.9046	[M-H]-	2.175	3	0.7498	rp	334-48-5	2969	HMDB0000511	336	C01571	A	33384.7	31588.5	30961.8	27589	31966.9	33189	26067.3	26870.6	26155.6	ko00061,ko01100
T3_negative	MEDTN03187	p-Cresol sulfate	Organic acid and Its derivatives	Organic acid and Its derivatives	C7H8O4S	187.008	188.014	4.346	[M-H]-	0.588381	1	0.7921	rp	3233-58-7	4615423	HMDB0011635	-	-	B	3420.97	3288	3555.88	3445.21	3975.31	4719.73	3796.43	3809.91	3831.22	-
T3_negative	MW0104827	Oxoadipic acid	Organic acid and Its derivatives	Organic acid and Its derivatives	C6H8O5	141.018	160.037	0.6858	[M-H2O-H]-	1.34396	1	0.8716	rp	3184-35-8	71	HMDB0000225	5234	C00322	A	1.3776e+06	1.36318e+06	1.29545e+06	1.16752e+06	1.17975e+06	1.25008e+06	1.23793e+06	1.23426e+06	1.23619e+06	ko00310,ko00380,ko00785,ko01100,ko01210,ko01230,ko01240
T3_negative	MW0107187	Glyoxylic acid	Organic acid and Its derivatives	Organic acid and Its derivatives	C2H2O3	133.015	74.0004	1.3886	[M+CH3COO]-	1.57821	2	0.7534	rp	298-12-4	760	HMDB0000119	3213	C00048	A	14882	12514.2	13643.3	11724.3	11025.6	14024.1	13913.9	14438.9	14433.8	ko00230,ko00232,ko00260,ko00330,ko00630,ko01100,ko01200
T3_negative	MW0053478	Geniposidic acid	Organic acid and Its derivatives	Organic acid and Its derivatives	C16H22O10	409.085	374.121	1.7279	[M+Cl]-	8.6199	2	0.7082	rp	27741-01-1	443354	HMDB0034942	-	-	B	5433.3	3742.23	4861.09	3517.95	1522.49	4316.93	4080.76	4086.97	4104.16	-
T3_negative	MEDN1299	1-Aminocyclohexanoic acid	Organic acid and Its derivatives	Organic acid and Its derivatives	C7H13NO2	285.183	143.095	2.8989	[2M-H]-	1.83769	1	0.7408	rp	2756-85-6	1366	-	-	-	B	218786	214848	212509	183014	190857	197705	195967	195660	196282	-
T3_negative	MW0117575	4-Chloro-1H-indole-3-acetic acid	Organic acid and Its derivatives	Organic acid and Its derivatives	C10H8ClNO2	208.008	209.024	4.7148	[M-H]-	19.2225	2	0.7298	rp	2519-61-1	100413	HMDB0032936	-	-	B	3023.72	1720.43	1059.82	2651.51	1970.91	1914.11	2892.75	2850.96	2701.61	-
T3_negative	MEDN1324	5-Phenylvaleric acid	Organic acid and Its derivatives	Organic acid and Its derivatives	C11H14O2	177.093	178.099	6.2324	[M-H]-	1.19181	1	0.8749	rp	2270-20-4	16757	HMDB0002043	6456	-	A	3768.83	4450.51	2229.5	1353.64	3702.28	849.775	5235.12	5282.14	5278.98	-
T3_negative	MW0014128	3-Hydroxytetradecanoic acid	Organic acid and Its derivatives	Organic acid and Its derivatives	C14H28O3	243.197	244.204	6.548	[M-H]-	2.08951	2	0.9556	rp	1961-72-4 | 3422-31-9	16064	HMDB0061656	35541	-	A	12347.8	11246	11905.3	9881.61	11533.7	9565.43	11031.1	11136.7	11140.2	-
T3_negative	MW0115763	trans-4-Methylene-2-octyl-5-oxotetrahydrofuran-3-carboxylic acid	Organic acid and Its derivatives	Organic acid and Its derivatives	C14H22O4	253.145	254.152	4.4062	[M-H]-	1.70188	2	0.7501	rp	191282-48-1	9881506	-	96547	-	B	2294.71	2464.55	1500.64	3107.16	1861.49	3014.93	1721.5	1706.26	1821.59	-
T3_negative	MW0053997	Hydroxyvalerenic Acid	Organic acid and Its derivatives	Organic acid and Its derivatives	C15H22O3	309.171	250.157	6.3904	[M+CH3COO]-	5.17867	2	0.7862	rp	1619-16-5	6537505	HMDB0036563	-	-	B	9894.17	8446.49	7841.02	5843.69	9653	7288.87	7372.44	7348.38	7414.34	-
T3_negative	MW0105037	3-Hydroxydecanoic acid	Organic acid and Its derivatives	Organic acid and Its derivatives	C10H20O3	187.135	188.141	6.285	[M-H]-	2.65	3	0.8886	rp	14292-26-3 | 5561-87-5 | 33044-91-6	26612	HMDB0002203	6544	-	B	5230.34	4244.96	4375.96	4599.78	5163.1	7592.53	2498.66	3420.66	3278.99	-
T3_negative	MEDN0304	Cinnamic Acid	Organic acid and Its derivatives	Organic acid and Its derivatives	C9H8O2	147.046	148.052	2.0932	[M-H]-	2.175	3	0.8676	rp	140-10-3	444539	HMDB0000930	5880	C10438	A	73173.1	73807.7	77392.6	72639.4	78122.3	81068	75046.9	75117.2	75137.4	-
T3_negative	MW0109254	Phosphoenolpyruvate	Organic acid and Its derivatives	Phosphoric acids	C3H5O6P	166.97	167.982	1.3523	[M-H]-	10.6072	1	0.8677	rp	138-08-9	1005	HMDB0000263	-	C00074	A	8082.28	7251.48	7728.88	6099.86	5525.13	8039.52	7376.38	7457.34	7460.33	ko00010,ko00020,ko00400,ko00440,ko00620,ko01100,ko01200,ko01230,ko01240,ko04922,ko04964,ko05230
T3_negative	MW0104839	2-Phosphoglycolic Acid	Organic acid and Its derivatives	Organic acid and Its derivatives	C2H5O6P	174.983	155.982	1.2829	[M+F]-	5.575	3	0.9074	rp	13147-57-4	529	HMDB0000816	-	C00988	A	10015.7	8261.32	7908.05	7037.39	6615.36	8955.15	7634.81	7406.45	7631.1	ko00630,ko01100,ko01200
T3_negative	MW0015582	Adipic acid	Organic acid and Its derivatives	Organic acid and Its derivatives	C6H10O4	145.051	146.058	2.5518	[M-H]-	1.975	3	0.866	rp	124-04-9	196	HMDB0000448	115	C06104	B	5258.99	897.009	5095.28	5644.72	4905.57	6324.08	2554.86	3155.02	3413.34	ko01100
T3_negative	MW0016023	Azelaic acid	Organic acid and Its derivatives	Organic acid and Its derivatives	C9H16O4	187.099	188.105	4.3193	[M-H]-	3.85915	1	0.963	rp	123-99-9	2266	HMDB0000784	5750	C08261	A	73477.6	66858.6	64163.2	57907.5	62738.6	98790.2	69740.7	70010.9	69735.8	-
T3_negative	MW0142864	3-Carboxy-cis,cis-muconic acid	Organic acid and Its derivatives	Organic acid and Its derivatives	C7H6O6	205.011	186.016	1.8439	[M+F]-	10.1	3	0.8801	rp	1116-26-3	5280404	-	-	C01163	B	392946	325411	242470	68832.6	157805	190057	96199.3	103693	89486	ko01100
T3_negative	MW0011067	Pantoic acid	Organic acid and Its derivatives	Organic acid and Its derivatives	C6H12O4	188.094	148.074	2.991	[M-H+CH3CN]-	3.3	3	0.8828	rp	1112-33-0	439251	HMDB0240389	-	C00522	B	3319.09	2513.92	3568.36	2595.25	2463.6	2801.03	2520.01	2509.7	2524.78	ko00770,ko01100,ko01240
T3_negative	MW0007542	Maleic acid	Organic acid and Its derivatives	Organic acid and Its derivatives	C4H4O4	132.031	116.011	1.1199	[M+NH4-2H]-	1.35	3	0.8879	rp	110-16-7	444266	HMDB0000176	-	C01384	A	5233.42	5632.05	6229.99	5947.54	6592.48	4913.47	5527.96	5375.75	5559.86	ko00350,ko00650,ko00760,ko01100
T3_negative	MW0169880	Succinic acid	Organic acid and Its derivatives	Organic acid and Its derivatives	C4H6O4	117.02	118.027	1.5669	[M-H]-	1.83512	1	0.8026	rp	110-15-6	1110	HMDB0000254	-	C00042	A	4769.23	2634.9	4394.19	4054.66	4442.69	3115.13	5899.77	5920.59	5909.17	ko00020,ko00190,ko00250,ko00310,ko00350,ko00360,ko00620,ko00630,ko00640,ko00650,ko00760,ko00920,ko01100,ko01200,ko04024,ko04727,ko04922,ko05230
T3_negative	MEDN0571	3-(3-Methoxyphenyl)Propionic Acid	Organic acid and Its derivatives	Organic acid and Its derivatives	C10H12O3	179.069	180.079	5.3364	[M-H]-	6.08352	1	0.7958	rp	10516-71-9	66336	HMDB0011751	-	-	A	2918.17	2171.93	2651.87	804.381	1554.17	1445.81	2346.76	2428.46	2415.42	-
T3_negative	MW0143684	5-Oxo-4,5-dihydro-2-furylacetic acid	Organic acid and Its derivatives	Organic acid and Its derivatives	C6H6O4	141.018	142.027	1.4449	[M-H]-	2.66541	1	0.9939	rp	-	104	-	-	C03586	A	9219.42	3848.77	9190.04	5858.85	8993.15	6457.87	6393.02	6681.65	6319.14	ko01100
T3_negative	MW0013656	2-Propyl-2-pentenoic acid	Organic acid and Its derivatives	Organic acid and Its derivatives	C8H14O2	283.193	142.099	6.857	[2M-H]-	2.22913	1	0.7724	rp	-	6437068	HMDB0013902	-	C16653	B	4874.65	2917.75	4636.6	4088.91	5489.29	5176.37	4242.03	4275.7	4439.98	ko00982
T3_negative	MEDL01915	2-Propylglutaric acid	Organic acid and Its derivatives	Organic acid and Its derivatives	C8H14O4	233.094	174.089	4.1113	[M+CH3COO]-	19.8931	1	0.7445	rp	-	134970	HMDB0060684	-	C16658	B	1492.67	5907.36	5513.99	4153.81	5932.5	5426.65	4500.85	4320.31	4488.82	ko00982
T3_negative	MW0104412	(2R,6S)-2,6-Diaminoheptanedioic acid	Organic acid and Its derivatives	Organic acid and Its derivatives	C7H14N2O4	171.067	190.095	3.7939	[M-H2O-H]-	22.3388	2	0.7774	rp	-	865	HMDB0242532	-	-	A	16746.6	18123.3	18344.7	12399.1	17415.6	13732.8	15325.1	15446	15394.6	-
T3_negative	MW0135553	Naringenin-4'-o-beta-d-glucuronide	Organic acid and Its derivatives	Organic acid and Its derivatives	C21H20O11	429.08	448.101	6.1973	[M-H2O-H]-	3.81424	2	0.7239	rp	-	53394091	HMDB0257722	-	-	B	158913	151218	164047	144170	144306	162426	150400	150045	150675	-
T3_negative	FDATP01419	Fosfosal	Organic acid and Its derivatives	Phosphoric acids	C7H7O6P	277.018	217.998	3.7661	[M+CH3COO]-	12.5301	2	0.7078	rp	-	3418	HMDB0252467	-	-	A	29798.3	35320.5	39002.9	35575.6	43909.1	42520.5	37604.8	37608.9	37817.2	-
T3_negative	MW0161604	Fructose-6-Phosphate (closed form)	Organic acid and Its derivatives	Organic acid and Its derivatives	C6H13O9P	300.049	260.03	1.376	[M-H+CH3CN]-	1.9	3	0.9145	rp	-	15648788	-	-	-	B	4926.99	3899.65	4239.06	3301.4	2672.2	4159.07	3417.91	3517.94	3428.39	-
T3_negative	MW0140064	(-)-Threo-isodihomocitric acid	Organic acid and Its derivatives	Organic acid and Its derivatives	C8H12O7	239.061	220.058	7.7594	[M+F]-	9.25	3	0.8154	rp	-	24892803	-	-	-	B	5270.72	20613.6	13494.7	4543.88	5181	4070.04	31116	31147.6	31649.5	-
T3_negative	MW0109038	Pantotheine-4'-phosphate	Organic acid and Its derivatives	Organic acid and Its derivatives	C11H23N2O7PS	357.089	358.096	2.4764	[M-H]-	1.12009	3	0.7726	rp	-	987	HMDB0001416	-	-	A	52834.4	48938.6	48659.8	38435.7	44442.8	68624	47945.7	48099.1	47961	-
T3_negative	MW0104015	(S)-9-Hydroxy-10-undecenoic acid	Organic acid and Its derivatives	Organic acid and Its derivatives	C11H20O3	199.135	200.141	5.9885	[M-H]-	2.95166	3	0.7713	rp	-	10465398	HMDB0032662	-	-	B	18725.3	15734.3	15224.8	18989.6	15015	15487.9	15388	15420.4	15221.1	-
T3_negative	MW0141729	1-epi-Valienol 7-phosphate	Organic acid and Its derivatives	Organic acid and Its derivatives	C7H13O8P	237.014	256.035	1.0922	[M-H2O-H]-	11.5724	3	0.7615	rp	-	101240808	-	-	C21205	B	17973	24378.6	17159.7	14345.5	13223.9	17603	18965.6	19437.7	18760	ko01100
T3_negative	MW0147511	cis-Dihomoaconitic acid	Organic acid and Its derivatives	Organic acid and Its derivatives	C8H10O6	223.029	202.048	7.7594	[M+Na-2H]-	17.4	3	0.7497	rp	-	25244890	-	-	C20581	B	60008.4	35039.4	24005.1	7772.17	9416.76	31173.6	55855.4	55890.7	56318.2	ko01100,ko01210
T3_negative	MW0140572	(2R)-dihomocitric acid	Organic acid and Its derivatives	Organic acid and Its derivatives	C8H12O7	239.061	220.058	6.548	[M+F]-	8.75	3	0.7277	rp	-	24892801	-	-	-	B	3263.66	3192.76	10628.4	3244.21	3770.2	3862.14	8328.73	8231.02	8291	-
T3_negative	MW0131533	3,4,5-trihydroxy-6-({4-hydroxy-2-oxo-2H-furo[2,3-h]chromen-8-yl}oxy)oxane-2-carboxylic acid	Organic acid and Its derivatives	Organic acid and Its derivatives	C17H14O11	375.031	394.054	4.4502	[M-H2O-H]-	8.46152	3	0.7174	rp	-	131839346	HMDB0135851	-	-	B	48416.5	54725.3	57804.7	57069	62725.3	62973.4	56013.7	56009	56076.4	-
T3_negative	MW0141190	1,7-Diphospho-1-epi-valienol	Organic acid and Its derivatives	Organic acid and Its derivatives	C7H14O11P2	381.009	336.001	2.0344	[M+HCOO]-	13.3327	3	0.7157	rp	-	50994408	-	-	C21206	B	14669.5	32813.3	8651.86	9497.34	5318.31	13476	11019	11127.7	11014.5	ko01100
T3_negative	MW0136653	6-hydroxy-1-oxo-1H-isochromene-3-carboxylic acid	Organic acid and Its derivatives	Organic acid and Its derivatives	C10H6O5	265.043	206.022	1.5607	[M+CH3COO]-	10.8358	3	0.7073	rp	-	131834928	HMDB0128624	-	-	B	8075.96	19486.9	31479.7	32204.5	7336.72	24543.1	19087.4	16719.1	20921.4	-
T3_negative	MW0129093	{2-[5,7-dihydroxy-2-(3-methoxyphenyl)-4-oxo-4H-chromen-6-yl]-4-hydroxy-6-methyl-5-oxooxan-3-yl}oxidanesulfonic acid	Organic acid and Its derivatives	Organic acid and Its derivatives	C22H20O12S	507.053	508.067	5.0561	[M-H]-	12.51	3	0.7071	rp	-	131833700	HMDB0127338	-	-	B	5043.11	10089.1	8535.01	10743.8	6903.55	11358.1	8413.08	8214.32	7793.68	-
T3_negative	MW0133360	Hexahydroxydiphenic acid	Organic acid and Its derivatives	Organic acid and Its derivatives	C14H10O10	337.026	338.027	2.1036	[M-H]-	1.50825	4	0.7137	rp	-	10315050	HMDB0126632	-	-	B	5501.35	5953.75	2302.03	5087.33	4456.72	5194.16	4926.03	5086.64	5077.93	-
HILIC_negative	MW0162863	3-(Imidazol-4-yl)-2-oxopropyl phosphate(2-)	Organic acid and Its derivatives	Organic acid and Its derivatives	C6H7N2O5P-2	217.003	218.009	1.6498	[M-H]-	1.854	4	0.7057	hilic	99979-59-6	25244516	-	-	-	B	3884.11	3769.67	2795.38	787.463	1578.23	1366.19	2669.42	2786.65	2110.78	-
HILIC_negative	MEDN1476	Allantoic acid	Organic acid and Its derivatives	Organic acid and Its derivatives	C4H8N4O4	221.053	176.055	2.6582	[M+HCOO]-	1.63073	1	0.7771	hilic	99-16-1	203	HMDB0001209	343	C00499	A	37133.2	27091.7	24554.2	11916.2	11404.3	15903.6	21196	20915.1	19389.3	ko00230,ko01100
HILIC_negative	MW0106168	Citric acid	Organic acid and Its derivatives	Organic acid and Its derivatives	C6H8O7	191.02	192.027	5.2442	[M-H]-	2.84279	1	0.9503	hilic	77-92-9	311	HMDB0000094	124	C00158	A	11519.6	6956.31	8566.88	3920.85	4581.97	4693.72	7285.36	6979.54	6745.46	ko00020,ko00250,ko00630,ko01100,ko01200,ko01210,ko01230,ko01240,ko04742,ko04922,ko05230
HILIC_negative	MEDN1302	1D-myo-inositol 1,4-bisphosphate	Organic acid and Its derivatives	Organic acid and Its derivatives	C6H14O12P2	338.989	339.996	5.4114	[M-H]-	3.27214	1	0.8205	hilic	74465-19-3	439444	HMDB0000968	5911	C01220	A	127448	108168	115370	66216.4	58088.9	132681	97233.3	97405.7	95510.7	ko00562,ko01100,ko04070
HILIC_negative	MW0106190	Creatinolfosfate	Organic acid and Its derivatives	Phosphoric acids	C4H12N3O4P	197.06	197.056	4.9177	[M-]-	8.6444	2	0.7401	hilic	6903-79-3	23342	-	73577	-	B	13572.5	16814	13039.3	10193	9916.01	9787.32	11630	11431.1	11141.3	-
HILIC_negative	MEDP1824	Caftaric acid	Organic acid and Its derivatives	Organic acid and Its derivatives	C13H12O9	311.039	312.048	2.8215	[M-H]-	2.79607	1	0.7859	hilic	67879-58-7	6440397	HMDB0013680	-	-	A	79800.2	57387.6	52699.9	35185	34041.4	37383.6	56819.3	54265	52742.9	-
HILIC_negative	MW0105579	Alendronic acid	Organic acid and Its derivatives	Organic acid and Its derivatives	C4H13NO7P2	229.999	249.017	3.7477	[M-H2O-H]-	14.9214	2	0.7397	hilic	66376-36-1	2088	HMDB0001915	818	C07752	B	7795	7082.17	6714.64	6187.62	6227.46	6936.01	6902.79	6929.11	6914.91	-
HILIC_negative	MW0150558	Glycerophosphoglycerol	Organic acid and Its derivatives	Phosphoric acids	C6H15O8P	245.043	246.05	2.8758	[M-H]-	0.0101237	3	0.8204	hilic	6418-92-4	439964	-	-	C03274	B	16813.1	17491.1	19613.1	17242.1	16322	15747.3	18435.1	18126.5	17823.9	-
HILIC_negative	MEDN0820	3-Hydroxyglutaric acid	Organic acid and Its derivatives	Organic acid and Its derivatives	C5H8O5	147.03	148.037	3.5496	[M-H]-	2.42345	1	0.7835	hilic	638-18-6	181976	HMDB0000428	5417	-	A	3956.6	4157.11	6680.94	5203.72	4151.59	4962.66	6486.36	6488.85	6384.74	-
HILIC_negative	MW0112907	3-O-Feruloylquinic acid	Organic acid and Its derivatives	Organic acid and Its derivatives	C17H20O9	367.107	368.111	2.6582	[M-H]-	11.7708	2	0.8101	hilic	62929-69-5	9799386	HMDB0030669	-	C02572	B	68647.8	134221	476836	624166	809692	342970	248686	249107	256897	-
HILIC_negative	MW0005966	Acitretin	Organic acid and Its derivatives	Organic acid and Its derivatives	C21H26O3	325.185	326.188	0.8006	[M-H]-	11.7695	1	0.9013	hilic	55079-83-9	5284513	HMDB0014602	-	-	A	66538.3	54884.3	43224.7	46521.7	46239.4	38435.7	78030.7	76336.8	76482.4	-
HILIC_negative	MW0054720	3-Hydroxymethylglutaric acid	Organic acid and Its derivatives	Organic acid and Its derivatives	C6H10O5	161.046	162.053	3.2761	[M-H]-	1.55538	1	0.9466	hilic	503-49-1	1662	HMDB0000355	5344	C03761	A	10399.8	8190.24	14836.7	9321.11	8535	15128.3	8405.85	8373.54	7921.64	-
HILIC_negative	MEDL00439	Lactic acid	Organic acid and Its derivatives	Organic acid and Its derivatives	C3H6O3	89.025	90.0317	1.6498	[M-H]-	1.84511	1	0.9491	hilic	50-21-5 | 26100-51-6 | 598-82-3 | 26811-96-1	612	HMDB0144295	-	C01432	A	473216	383639	386106	322900	324224	546053	395392	397099	397554	-
HILIC_negative	MW0109017	Oxalacetic acid	Organic acid and Its derivatives	Organic acid and Its derivatives	C4H4O5	112.986	132.006	4.0354	[M-H2O-H]-	7.97539	2	0.9329	hilic	328-42-7	970	HMDB0000223	123	C00036	A	1.07762e+06	958683	1.03068e+06	917890	899915	997534	984080	988076	988406	ko00010,ko00020,ko00250,ko00470,ko00620,ko00630,ko01100,ko01200,ko01210,ko01230,ko01240,ko04922,ko04964,ko05230
HILIC_negative	MW0159669	Potassium bicarbonate	Organic acid and Its derivatives	Organic acid and Its derivatives	KHCO3	98.9491	99.9563	0.8006	[M-H]-	2.06789	3	0.8588	hilic	298-14-6	516893	-	-	C18606	B	210.901	104.824	2248.88	135.298	144.251	137.077	2826.68	2780.08	2858.52	-
HILIC_negative	MW0123679	Dihydropteroate	Organic acid and Its derivatives	Organic acid and Its derivatives	C14H14N6O3	366.109	314.113	2.6582	[M+Cl+NH3]-	1.775	3	0.8992	hilic	2134-76-1	135398662	HMDB0001412	-	C00921	B	16208.9	31468.1	103649	132033	169474	75292.6	56268.1	56341.8	57946.3	ko00790,ko01100,ko01240
HILIC_negative	MW0011694	C22H30Ino4S	Organic acid and Its derivatives	Organic acid and Its derivatives	C22H30INO4S	530.077	531.094	2.7312	[M-H]-	14.1167	2	0.705	hilic	133538-58-6	5312147	-	45634	-	B	25317.3	21716.5	17318.1	18218.9	10950	13354.1	19292.1	18325.5	17908.3	-
HILIC_negative	MW0109836	Thiodiglycolic acid	Organic acid and Its derivatives	Organic acid and Its derivatives	C4H6O4S	298.99	149.999	1.6311	[2M-H]-	0.121464	3	0.7156	hilic	123-93-3	31277	HMDB0042032	-	C14872	A	39295.3	33123.8	32081.8	15505.2	14257.8	23587.7	31376.5	31821.3	28509.8	ko00980
HILIC_negative	MW0111244	1-Palmitoyl-2-thiopalmitoyl phosphatidylcholine	Organic acid and Its derivatives	Phosphoric acids	C40H80NO7PS	784.515	749.539	0.8927	[M+Cl]-	2.25218	4	0.9468	hilic	113881-60-0	195048	-	64953	-	B	22634.2	26760.9	28877.3	23452.9	18267.3	20684.8	21179.8	20986.9	21113.7	-
HILIC_negative	MW0169232	Glutaric acid	Organic acid and Its derivatives	Organic acid and Its derivatives	C5H8O4	113.024	132.042	2.6582	[M-H2O-H]-	10.7893	1	0.7348	hilic	110-94-1	743	HMDB0000661	3254	C00489	A	3242.44	5492.9	7259.03	8668.64	10238.4	6637.6	6570.68	6626.13	6669.38	ko00071,ko00310,ko01100
HILIC_negative	MW0111044	3-Guanidinopropionic acid	Organic acid and Its derivatives	Organic acid and Its derivatives	C4H9N3O2	261.133	131.07	3.2761	[2M-H]-	1.15974	1	0.9547	hilic	-	67701	HMDB0013222	-	C03065	B	1127.32	678.628	984.648	300.997	686.967	265.891	2377.94	2159.18	1611.22	-
HILIC_negative	MEDN1382	1-Hydroxy-2-naphthoate	Organic acid and Its derivatives	Organic acid and Its derivatives	C11H7O3-	187.042	187.04	1.6496	[M-H]-	7.86607	1	0.8529	hilic	-	54675865	-	-	-	A	95686.5	65216.9	78889.3	66596.6	73120.9	124189	79423.9	81272.7	85851.8	-
HILIC_negative	MEDL02771	Dihydroxyacetone phosphate	Organic acid and Its derivatives	Organic acid and Its derivatives	C3H7O6P	168.991	169.998	4.2537	[M-H]-	0.246773	1	0.8382	hilic	-	668	HMDB0001473	6262	C00111	A	24050	21859.3	21378.7	15615.6	16257.7	23933.4	19346	19285.7	19226.4	ko00010,ko00040,ko00051,ko00052,ko00561,ko00562,ko00564,ko00630,ko00640,ko00760,ko01100,ko01200,ko01230
HILIC_negative	MW0152132	L-Ascorbate 6-phosphate	Organic acid and Its derivatives	Organic acid and Its derivatives	C6H9O9P	236.978	255.998	4.2537	[M-H2O-H]-	7.39446	3	0.765	hilic	-	54723872	-	-	-	B	3871.02	3675.19	4369.1	3608.22	3504.12	6566.94	4689.63	4944.18	4909.92	-
HILIC_negative	MW0113327	6-(2-ethenyl-5-hydroxy-4-methoxyphenoxy)-3,4,5-trihydroxyoxane-2-carboxylic acid	Organic acid and Its derivatives	Organic acid and Its derivatives	C15H18O9	387.097	342.095	0.7893	[M+HCOO]-	19.0671	3	0.7593	hilic	-	131834413	HMDB0128038	-	-	B	969.252	2635.59	7089.34	1274.54	4525.5	4230.85	41428	42113	41653.8	-
HILIC_negative	MW0112394	Quinol glucuronide	Organic acid and Its derivatives	Organic acid and Its derivatives	C12H14O8	331.065	286.069	3.526	[M+HCOO]-	4.90441	3	0.714	hilic	-	18938462	HMDB0259508	-	-	B	653.421	1294.98	1624.49	444.092	725.575	1148.47	1305.29	1236.25	1070.06	-
HILIC_negative	MW0154537	N-methyl-2-oxoglutaramic acid	Organic acid and Its derivatives	Organic acid and Its derivatives	C6H9NO4	199.07	159.053	5.9209	[M-H+CH3CN]-	5.7	3	0.7046	hilic	-	440065	-	-	C03623	B	2989.17	2762.55	2616.74	1969.88	2403.18	3198.81	2798.43	2803.86	2731.58	-
T3_positive	MW0103574	Gemcitabine	Others	FDA	C9H11F2N3O4	264.079	263.072	2.3677	[M+H]+	0.883376	1	0.7425	rp	95058-81-4	60750	HMDB0014584	-	C07650	B	1544.87	1214.55	1565.88	1277.53	1724.34	1750.1	1586.48	1618.39	1588.85	-
T3_positive	MW0127102	Demeton-S-methyl	Others	Others	C6H15O3PS2	195.014	230.02	5.0641	[M+H-2H2O]+	18.8293	2	0.7232	rp	919-86-8	13526	-	-	C18655	-	4231.98	5944.52	5199.74	2433.25	6275.19	5641.86	5592.31	5622.37	5688.2	-
T3_positive	MW0109259	(R)-3-Amino-4-(3-hexylphenylamino)-4-oxobutylphosphonic acid	Others	Others	C16H27N2O4P	325.169	342.171	3.387	[M+H-H2O]+	3.40606	2	0.757	rp	909725-61-7	6857802	-	45167	-	-	5576.19	5087.81	5609.67	4134.58	4587.63	5208.26	4627.84	4607.35	4364.18	-
T3_positive	MW0123340	Ciprofloxacin	Others	Medicine	C17H18FN3O3	354.124	331.133	2.5441	[M+Na]+	5.81074	2	0.7205	rp	85721-33-1	2764	HMDB0014677	-	C05349	B	9142.03	8681.48	9213.58	6622.04	7766.01	8627.91	8855.62	8864.95	8865.05	ko02010
T3_positive	FDATN00620	Penicillin G sodium	Others	Medicine	C16H17N2NaO4S	335.103	356.081	5.0641	[M+H]+	7.60599	1	0.9767	rp	69-57-8	23668834	-	-	C76205	B	129092	182315	207235	165602	249195	213844	205579	205586	205630	-
T3_positive	MW0109835	Thiodicarb	Others	Insecticide	C10H18N4O4S3	377.04	354.049	4.4638	[M+Na]+	6.75574	2	0.7167	rp	59669-26-0	9601227	-	-	-	B	5095.51	4688.43	5861.74	4578.12	6316.17	5852.74	5504.38	5487.53	5517.65	-
T3_positive	FDATP01719	Octodrine	Others	Medicine	C8H19N	130.157	129.152	2.8285	[M+H]+	4.72044	1	0.7643	rp	543-82-8	10982	-	-	-	B	4412.2	3026.12	2921.38	2912.23	2799.44	2848.23	3364.01	3387.33	3375.18	-
T3_positive	MW0106098	Camylofin	Others	Medicine	C19H32N2O2	338.285	320.246	7.0226	[M+NH4]+	10.2262	2	0.7062	rp	54-30-8	5902	-	-	-	B	1461.27	2773.19	2043.85	1671.47	812.613	818.956	1906.15	1905.41	1924.72	-
T3_positive	MW0139844	Tranilast	Others	Medicine	C18H17NO5	308.091	327.111	2.5441	[M+H-2H2O]+	0.260755	2	0.7587	rp	53902-12-8 | 70806-55-2 | 53902-17-3	5282230	-	-	-	B	19688.1	17874.8	18666.6	16185.1	16210.4	17474.5	16903.7	16946.7	16896.4	-
T3_positive	FDATN01417	Histamine phosphate	Others	Medicine	C5H15N3O8P2	330.024	307.033	4.4577	[M+Na]+	1.4035	4	0.7161	rp	51-74-1	65513	HMDB0014805	-	-	B	6883.73	5253.37	5806.01	5380.47	5318.32	5727.71	6112.75	6118.79	6076.47	-
T3_positive	MW0111296	Tetrabutylammonium hydrogen sulfate	Others	Others	C16H37NO4S	242.281	339.244	5.1726	[M+]+	5.53428	2	0.8741	rp	32503-27-8	94433	-	85164	-	-	5981.5	5021.15	5662.3	3853.98	4548.18	5324.17	5227.37	5226.2	5266.16	-
T3_positive	MW0127401	Axitinib	Others	Others	C22H18N4OS	387.128	386.12	6.8148	[M+H]+	0.64384	1	0.7624	rp	319460-85-0 | 319463-51-9	6450551	-	85189	-	-	1635.84	435.667	1146.01	2440.24	247.346	467.676	2977.44	3003.09	2994.42	-
T3_positive	FDATN01054	Midodrine hydrochloride	Others	Medicine	C12H19ClN2O4	313.094	290.103	0.5864	[M+Na]+	0.83725	4	0.7295	rp	3092-17-9 | 43218-56-0	18340	-	-	-	B	7543.64	7321.14	9049.51	6772.12	8008.39	8929.25	7582.93	7582.66	7558.29	-
T3_positive	MW0127565	Carbamimidothioic acid, methyl ester	Others	Others	C2H6N2S	113.019	90.0252	0.9389	[M+Na]+	0.327725	4	0.7419	rp	2986-19-8 | 867-44-7	5142	-	64870	-	-	1745.58	703.177	1456.71	707.623	849.896	1936.63	1422.84	1434.22	1389.63	-
T3_positive	MW0123225	Carbimazole	Others	Medicine	C7H10N2O2S	209.039	186.046	4.3032	[M+Na]+	6.14314	1	0.7317	rp	22232-54-8	31072	HMDB0014533	-	C07615	B	2804.75	1690.65	1857.1	2188.11	2307.42	2442.7	2411.49	2403.57	2369.23	-
T3_positive	MW0125198	Molinate	Others	Others	C9H17NOS	188.108	187.103	6.4208	[M+H]+	7.79864	2	0.8042	rp	2212-67-1	16653	-	68828	-	B	4900.82	4517.4	4108.92	3893.96	3649.56	3776.87	4080.47	3997.15	3985.67	-
T3_positive	MW0111311	Tetrapentylammonium	Others	Others	C20H44N+	298.343	298.347	6.474	[M+]+	12.8528	2	0.8828	rp	15959-61-2	17249	-	-	-	-	7727.37	9634.75	7648.77	8283.16	8083.88	12464.4	9339.34	9361.09	9363.58	-
T3_positive	MW0017158	cis-5,6-Dihydro-5,6-dihydroxy-carotene	Others	Hydrocarbon derivatives	C40H58O2	571.453	570.444	8.1165	[M+H]+	5.30948	3	0.8157	rp	143167-26-4	53477757	HMDB0002746	-	-	B	81205.7	78037.9	32453.3	71989.3	58963.2	22608.5	43571.9	45543.8	39985	-
T3_positive	FDATN01438	Monosodium glutamate	Others	Medicine	C5H8NNaO4	148.058	169.035	0.8419	[M+H]+	7.08289	1	0.9646	rp	142-47-2 | 16177-21-2 | 6106-04-3	23672308	-	-	-	B	62615.8	51992.2	57592.1	45448	55732.5	58028	55797.8	56419.3	56795.7	-
T3_positive	MW0143451	5-(4-Piperidyl)isoxazol-3-ol	Others	Others	C8H12N2O2	191.074	168.09	0.6965	[M+Na]+	12.1942	4	0.7718	rp	132033-91-1	125520	-	-	C13710	-	22542.8	21497.6	23316.8	20223.2	23484.1	24053.9	23324.3	23331	23534.2	-
T3_positive	FDATP00975	Trimetazidine dihydrochloride	Others	Medicine	C14H24Cl2N2O3	267.169	338.116	7.101	[M+H]+	1.5448	1	0.9052	rp	13171-25-0	83201	-	-	-	B	46661.4	39255.2	40962.8	28002.5	35486.4	27700	26640.7	26266.8	26238.8	-
T3_positive	MW0000418	Quininae	Others	Others	C20H24N2O2	351.184	324.184	4.3032	[M+NH4]+	19.4715	2	0.723	rp	130-95-0	8549	HMDB0014611	65426	C06526	B	15357.8	14179.6	15492.6	10947.2	13286.6	14663.2	14639.1	14553.6	14549.8	ko04742,ko04976
T3_positive	FDATP02068	Pyridostigmine bromide	Others	Medicine	C9H13BrN2O2	283.003	260.016	0.9572	[M+Na]+	0.097	4	0.7476	rp	101-26-8	7550	-	-	-	B	4621.03	4331.38	3260.84	3279.64	2124.61	5899.35	2514.99	2486	2176.82	-
T3_positive	MW0063633	Spironolactone	Others	Others	C24H32O4S	439.188	416.202	6.978	[M+Na]+	9.3257	1	0.7655	rp	-	5833	HMDB0014565	-	C07310	B	3079.29	5097.86	2856.39	3330.58	5130.57	3920	2621.19	2649.74	2643.86	-
T3_positive	MW0162175	(2S)-2-azaniumyl-3-[4-(3-methylbut-2-en-1-yl)-1H-indol-3-yl]propanoate	Others	Others	C16H20N2O2	295.142	272.152	4.9987	[M+Na]+	0.8	3	0.9648	rp	-	25200966	-	-	-	-	2509.3	2025.28	1774.09	1615.62	648.497	1477.58	2093.83	2133.14	2059.56	-
T3_positive	MW0129307	{4-[3-(5-hydroxy-2,2-dimethyl-2H-chromen-6-yl)prop-2-enoyl]phenyl}oxidanesulfonic acid	Others	Others	C20H18O7S	403.087	402.077	4.985	[M+H]+	4.0664	3	0.7898	rp	-	131832336	HMDB0125870	-	-	-	64704.8	64265.9	65551.5	56951.5	55453	59327.8	59004.7	59019.5	59300.9	-
T3_positive	MW0129857	Mollicellin J	Others	Others	C21H19ClO6	403.087	402.087	5.2829	[M+H]+	14.2402	3	0.7167	rp	-	24787300	HMDB0139187	-	-	-	48166.5	46947.8	47963.2	43853.4	41311.9	42981.7	44407.9	44315.1	44400.8	-
T3_positive	MW0168054	desferrimycobactin T	Others	Others	C46H75N5O10	880.523	857.551	6.641	[M+Na]+	8.62218	4	0.8249	rp	-	136041710	-	-	-	B	12878.7	19563.1	14646	10695.5	7771.2	8094.55	14736.7	14333.7	14886.1	-
T3_positive	MW0129309	{4-[3-(5-methoxy-2,2-dimethyl-2H-chromen-6-yl)prop-2-enoyl]phenyl}oxidanesulfonic acid	Others	Others	C21H20O7S	417.091	416.093	5.0641	[M+H]+	9.55036	4	0.8102	rp	-	131832324	HMDB0125858	-	-	-	4084.91	4477.82	4885.04	1523.51	6471.64	5497.02	5381.36	5409.41	5408.81	-
T3_positive	MW0165841	5OH-Hic	Others	Others	C11H15O4-	212.11	211.097	0.5864	[M+H]+	0.085	4	0.7479	rp	-	90658696	-	-	-	B	7871.9	7899.68	9231.35	7239.92	7250.55	8665.18	7618.77	7712.09	7614.11	-
T3_positive	MW0162426	2,3,7,9-tetrahydro-1H-purine-6,8-dione	Others	Others	C5H6N4O2	172.086	154.049	0.5864	[M+NH4]+	0.18875	4	0.7453	rp	-	25202617	-	-	-	-	15105.7	14348.8	17113.3	13684.9	13818.4	16404.3	14374.3	14359.8	14286.7	-
T3_positive	MW0194328	(R)-4(1H)-[2-[[(2S)-2-Carboxy-5-hydroxy-6-(beta-D-glucopyranosyloxy)-1-azoniaindoline]-1-ylidene]ethylidene]-2,3-dihydropyridine-2,6-dicarboxylic acid	Others	Others	C24H27N2O13+	569.185	551.151	7.2055	[M+NH4]+	0.569898	4	0.736	rp	-	101774297	-	-	-	-	20008.8	162315	119502	12279.9	142987	73303.5	44451.6	60240.6	54512.5	-
T3_positive	MW0127157	1-(Methylsulfinyl)propyl 1-propenyl disulfide	Others	Others	C7H14OS3	233.01	210.021	4.4378	[M+Na]+	0.807	4	0.7302	rp	-	14704628	HMDB0033058	-	-	-	1611.26	2118.02	1899.6	1737.63	1155.01	2004.49	2224.42	2219.4	2164.51	-
T3_positive	MW0121511	FD&C Yellow No. 5 free acid	Others	Others	C16H12N4O9S2	491.002	468.005	0.6227	[M+Na]+	15.8767	4	0.7261	rp	-	16014	HMDB0059914	-	-	-	7390.66	6917.62	6898.12	5465.76	7041.82	6866.25	7063.24	7097.66	7036.69	-
T3_positive	MW0165531	Thyroxine-4-sulfate	Others	Others	C15H10I4NO7S-	894.624	855.636	6.21	[M+K]+	17.8934	4	0.7044	rp	-	90657726	-	-	-	B	6084.4	6139.07	6279.78	3410.38	3390.99	3077.72	3800.7	3701.32	3739.53	-
T3_positive	MW0141841	1-Stearoyl-2-Oleoyl-sn-Glycero-3-[Phospho-rac-(1-glycerol)]	Others	Others	C42H81O10P	799.534	776.557	6.5707	[M+Na]+	10.3154	2	0.8772	rp	-	-	-	43206	-	-	1461.46	9600.65	1299.93	2992.97	7577.45	3120.26	30485.2	34117.2	31860.7	-
T3_positive	MW0144210	Abu-Phe4Cl-OH	Others	Others	C18H17ClN2O6	393.078	392.077	1.5412	[M+H]+	16.5049	2	0.8101	rp	-	-	-	64979	-	-	99570.8	101341	96865.6	81297.4	84377.4	114064	138938	126047	136299	-
T3_positive	MW0140296	(2R,4R)-tert-butyl 2-phenyl-4-vinylthiazolidine-3-carboxylate	Others	Others	C16H21NO2S	256.119	291.129	6.1823	[M+H-2H2O]+	9.10247	2	0.7286	rp	-	-	-	65472	-	-	20789.9	18900.4	18774	16928.2	16250.4	17061.7	17091.8	17163.8	17156.5	-
T3_positive	MW0144019	8,12-iso-iPF2VI-d11	Others	Others	C20H23D11O5	348.307	365.31	5.2433	[M+H-H2O]+	0.519104	2	0.7095	rp	-	-	-	96390	-	-	51670.4	24684.1	51312.6	4215.97	5287.34	5849.92	30169.3	30191.8	29745.9	-
T3_positive	MW0130104	2-(3,4-dihydroxy-5-methoxyphenyl)-3,5,7-trihydroxy-1lambdachromen-1-ylium	Others	Others	C16H13ClO7	353.043	352.035	4.789	[M+H]+	5.50302	3	0.7681	rp	-	-	HMDB0131422	-	-	-	2403.39	2162.42	2381.65	1888.97	2491.18	2562.62	2497.43	2452.56	2499.19	-
T3_positive	MW0146447	AVAAQFAK/1_0	Others	Others	C37H60N10O10	822.475	804.449	7.5379	[M+NH4]+	11.6707	4	0.779	rp	-	-	-	-	-	-	9243.7	8023.7	1001.91	3331.35	3051.26	1490.32	2771.07	2485.49	2855.56	-
T3_positive	MW0140925	[Met5,Lys6,7] alpha-Neo-Endorphin (1-7)	Others	Others	C39H59N9O9S	852.391	829.416	6.641	[M+Na]+	14.0408	4	0.7478	rp	-	-	-	-	-	-	165789	276019	300327	180754	179397	148728	184035	184610	181848	-
T3_positive	FDATN01078	Metronidazole benzoate	Others	Medicine	C13H13N3O4	298.08	275.091	1.4855	[M+Na]+	0.985	4	0.726	rp	-	83213	HMDB0254688	-	-	B	6953.17	6884.39	6774.09	10359.3	5583.82	6461.99	11522.2	10118.1	10871.2	-
T3_negative	MW0142228	2-amino-5-formylamino-6-(5-phosphoribosylamino)pyrimidin-4(3H)-one	Others	Others	C10H16N5O9P	426.068	381.069	1.7334	[M+HCOO]-	5.80971	3	0.7361	rp	88299-87-0	135476781	-	-	-	-	5950.21	3070	5122.79	3700.13	2198.42	3577.4	3017.88	3293.33	3587.89	-
T3_negative	FDATN01006	Sodium pantothenate	Others	Medicine	C9H16NNaO5	218.105	241.093	2.3485	[M-H]-	5.27504	1	0.9687	rp	867-81-2	23679004	-	-	-	B	220833	205488	214783	208553	209829	226390	212553	212056	212185	-
T3_negative	MW0123275	Naxcel	Others	Medicine	C19H17N5O7S3	557.992	523.029	2.1036	[M+Cl]-	1.89263	4	0.7049	rp	80370-57-6	6328657	-	-	-	B	713.533	1120.39	1987.83	1262.18	2134.08	933.042	1335.27	1430.79	1389.19	-
T3_negative	MW0123262	Cefodizime	Others	Medicine	C20H20N6O7S4	583.03	584.028	0.5866	[M-H]-	0.633702	4	0.9844	rp	69739-16-8	5361871	HMDB0041850	-	-	B	28448.6	26855.7	25206.4	23659	27313.2	24626.2	26956.3	27145.7	26899.5	-
T3_negative	MW0013912	3-Acetyl-11-keto-beta-boswellic acid	Others	Others	C32H48O5	512.353	512.35	3.6968	[M-]-	9.60791	2	0.7332	rp	67416-61-9	11168203	HMDB0245953	-	-	B	63985.3	63996.3	60007	53591.3	56939.6	65842.8	57820.6	57558.8	57494.3	-
T3_negative	FDATN01003	Kasugamycin hydrochloride	Others	Medicine	C14H26ClN3O9	414.133	415.136	2.1036	[M-H]-	6.64197	4	0.8587	rp	19408-46-9 | 6980-18-3	88045	-	-	-	B	9661.82	11082.9	7581.1	7125.7	12045.5	707.644	9496.27	9567.58	9631.18	-
T3_negative	MW0109742	Sodium dodecyl sulfate	Others	Others	C12H25NaO4S	265.149	288.137	8.2704	[M-H]-	5.01491	1	0.8208	rp	151-21-3 | 12738-53-3 | 12765-21-8 | 1334-67-4	3423265	-	58284	-	-	124991	114780	137611	84335.2	104702	69260.8	105641	105226	103632	-
T3_negative	MW0151251	(1-Hydroxy-3,7,11-trimethyldodeca-2,6,10-trienyl)phosphonic acid	Others	Others	C15H27O4P	301.167	302.165	5.6581	[M-H]-	20.2733	2	0.7025	rp	148796-53-6 | 140633-12-1	5353399	-	-	-	-	13779	7050.63	7467.85	8751.12	8241.71	7365.72	7997.86	8110.83	7910.42	-
T3_negative	MEDTP02857	Thiram	Others	Others	C6H12N2S4	299.004	239.988	1.8872	[M+CH3COO]-	0.730294	3	0.7442	rp	137-26-8	5455	-	-	-	B	542473	128726	99744.4	117687	489225	106329	156993	166366	90872.6	-
T3_negative	FDATN01253	Selumetinib	Others	Medicine	C17H15BrClFN4O3	436.977	457.998	4.3538	[M-H2O-H]-	2.45888	2	0.7635	rp	-	10127622	HMDB0304858	-	-	B	2963.26	9343.88	2520.63	7574.98	3971.25	1579.13	6209.95	5198.73	5722.03	-
T3_negative	MW0166794	CMP-7-O-acetyl-N-acetyl-beta-neuraminate	Others	Others	C22H31N4O17P-2	689.099	654.142	2.0863	[M+Cl]-	12.5094	4	0.7675	rp	-	122706321	-	-	-	B	5008.94	3635.45	4320.3	4327.13	3622.71	3372.3	2972.55	3017.94	3015.8	-
T3_negative	MW0164093	[[[(2R,4S)-5-(6-aminopurin-9-yl)-4-hydroxy-3-oxooxolan-2-yl]methoxy-oxidophosphoryl]oxy-oxidophosphoryl] phosphate	Others	Others	C10H10N5O13P3-4	499.949	500.949	0.8658	[M-H]-	12.3831	4	0.7692	rp	-	46173507	-	-	-	-	7266.78	6688.07	6051.28	6506.71	5393.82	5273.29	6049.71	6099.64	5979.32	-
T3_negative	MW0142126	2,7-Naphthalenedisulfonic acid,5-(acetylamino)-3-[2-[4-[[[3-(ethenylsulfonyl)phenyl]amino]carbonyl]phenyl]diazenyl]-4-hydroxy-	Others	Others	C27H22N4O11S3	709.022	674.045	0.6505	[M+Cl]-	13.7677	4	0.7512	rp	-	-	-	-	-	-	100725	100250	95780.4	85850.4	93509.1	93671.8	96048.6	96047.5	95888.8	-
HILIC_negative	MW0109220	Phenyl hydrogen sulfate	Others	Others	C6H6O4S	214.015	173.999	3.2761	[M-H+CH3CN]-	6.75	3	0.795	hilic	937-34-8	74426	HMDB0060015	-	C02180	B	4385.7	3776.23	4127.96	2695.54	2868.79	3032.44	3565.4	3592.82	3286.44	-
HILIC_negative	MW0168086	Bromide	Others	Others	Br-	78.9187	78.9183	1.125	[M-]-	1.58426	3	0.9992	hilic	7726-95-6	259	HMDB0002500	-	C01324	B	17930.1	24740.1	24095.4	17922	15785.1	19480.3	15731.2	15901.3	14922.2	-
HILIC_negative	MW0114829	Methoxyflurane	Others	Others	C3H4Cl2F2O	208.954	163.961	1.5941	[M+HCOO]-	9.29761	3	0.8219	hilic	76-38-0	4116	HMDB0015162	-	C07517	B	3613.33	4439.99	4375.57	2091.11	1471.13	1965.7	3340.3	3232.53	2988.53	-
HILIC_negative	MW0115671	Bromomethane	Others	Hydrocarbon derivatives	CH3Br	92.9278	93.9418	1.2915	[M-H]-	17.179	3	0.7459	hilic	74-83-9	6323	HMDB0031524	-	C18447	B	3802.28	3986.4	3711.35	8675.28	10437.3	11673.8	6581.6	6600.7	7758.96	-
HILIC_negative	FDATN00900	D-Arabinose	Others	Medicine	C5H10O5	195.051	150.053	3.4765	[M+HCOO]-	3.30089	1	0.8033	hilic	6748-95-4	6902	HMDB0029942	-	-	B	9302.64	8797.31	11084.3	7740.31	7121.76	7174.96	12095.2	11957.9	10860.7	-
HILIC_negative	MW0052898	Fenoldopam	Others	Medicine	C16H16ClNO3	305.082	305.082	0.4687	[M-]-	2.64591	2	0.7136	hilic	67227-56-9	3341	HMDB0014938	4024	C07693	B	6653.07	4215.27	5204.84	4089.29	4574.27	6851.81	4399.66	4400.13	4375.04	-
HILIC_negative	MW0014655	5,8-Epoxy-5,8-dihydro-3-hydroxy-8'-apo-b,y-carotenal	Others	Carotenoids	C30H40O3	447.283	448.298	1.467	[M-H]-	19.6917	3	0.7384	hilic	54899-35-3	131752520	HMDB0039024	-	-	B	491954	379560	473858	390077	321154	285293	401106	399945	391708	-
HILIC_negative	MW0141009	1-(1Z-Octadecenyl)-2-(4Z,7Z,10Z,13Z,16Z,19Z-docosahexaenoyl)-sn-glycero-3-phosphoethanolamine	Others	Others	C45H78NO7P	774.544	775.552	0.8752	[M-H]-	2.60532	2	0.9419	hilic	206059-98-5	42607458	HMDB0011394	-	-	B	645458	616745	696194	602459	547378	674015	583588	583038	592055	-
HILIC_negative	MW0127095	Amifostine	Others	Others	C5H15N2O3PS	214.048	214.054	3.7119	[M-]-	16.1877	1	0.8001	hilic	20537-88-6	2141	HMDB0015274	-	C06819	B	6190.68	8557.6	8584.42	10717	11216.4	7412.13	8670.48	8617.34	8697.01	-
HILIC_negative	FDATN00247	Bazedoxifene HCl	Others	Medicine	C30H35ClN2O3	505.228	506.234	1.5022	[M+Cl]-	0.968899	1	0.8111	hilic	198480-56-7	9936012	-	-	-	B	29286	36716.3	37797.2	24283.3	36209.8	26249	36342.8	35243.6	34863.8	-
HILIC_negative	MW0143929	7-[2-TRIFLUOROMETHYL-4-(2-HYDROXYPHENYL)-1,3-DIOXAN-cis-5-YL]-HEPT-5Z-ENOIC ACID	Others	Others	C18H21F3O5	373.126	374.134	2.6582	[M-H]-	2.44423	2	0.9136	hilic	106393-80-0	5311390	-	44667	-	B	29652.2	27738.1	66186.8	68025	70218.2	61526.6	39070.8	39525	40244	-
HILIC_negative	MEDP0797	1-Hydroxyanthraquinone	Others	Others	C14H8O3	223.029	224.047	0.7903	[M-H]-	24.8064	1	0.7773	hilic	-	8512	HMDB0243898	-	C02980	B	3758.09	6488.1	11705.6	4243.05	9877.62	8767.46	62587.5	61855.3	62305.9	-
HILIC_negative	MW0011627	(S)-3,7-Dimethyl-1,6-octadiene	Others	Hydrocarbon derivatives	C10H18	137.131	138.141	2.1132	[M-H]-	5.82248	3	0.8928	hilic	-	10887985	HMDB0061795	-	-	B	76266	67100.5	73109	66443.7	66597.5	71843	68683.4	68379.9	68681.2	-
HILIC_negative	MW0159357	VINYL FLUORIDE	Others	Hydrocarbon derivatives	C2H3F	91.0219	46.0219	0.7819	[M+HCOO]-	8.60263	3	0.8563	hilic	-	6339	HMDB0259825	-	C19185	B	345.096	351.391	699.272	93.35	630.84	573.411	4123.37	4071.55	4123.81	-
HILIC_negative	MW0194158	(2R,6S,7R,9R,12S,16S)-6-hydroxy-15-[(1S)-1-[5-(hydroxymethyl)-4-methyl-6-oxo-2,3-dihydropyran-2-yl]ethyl]-2,16-dimethyl-8-oxapentacyclo[9.7.0.02,7.07,9.012,16]octadec-4-en-3-one	Others	Others	C28H38O6	469.263	470.267	1.5023	[M-H]-	9.58243	2	0.7712	hilic	-	16745397	-	-	-	-	2863.5	2673.62	2618.17	3125.3	2972.05	3480.39	2775.12	2814.61	2888.25	-
HILIC_negative	MW0129827	12,16-dihydroxy-5,7,9,21-tetraoxahexacyclo[11.8.0.0(2),(1).0(3),.0,.0(1),(2)]henicosa-1(13),2(10),11,15,17,19-hexaen-14-one	Others	Others	C17H10O7	325.032	326.043	1.873	[M-H]-	6.47467	3	0.7585	hilic	-	131839489	HMDB0140674	-	-	B	9497.36	7071.4	9966.23	4895.19	3597.28	6168.98	6678.77	6471.21	6380.07	-
HILIC_negative	MW0165014	[(5aR,8R,9aR)-2-amino-4-oxo-6,7-disulfido-1,5,5a,8,9a,10-hexahydropyrano[3,2-g]pteridin-8-yl]methyl phosphate	Others	Others	C20H20MoN10O13P2S4-4	894.843	895.862	4.0354	[M-H]-	4.73736	4	0.8945	hilic	-	90658193	-	-	-	B	208712	178695	189037	153134	146180	165456	169193	168279	167297	-
T3_positive	MW0138153	Ferulic acid	Phenolic acids	Phenolic acids	C10H10O4	241.065	194.058	4.5395	[M+HCOO+2H]+	12.9	3	0.7411	rp	537-98-4	445858	HMDB0000954	4156	C01494	B	1029.81	2623.32	3082.18	2132.74	2834.69	3560.73	4251.95	4272.65	4277.26	ko01100
T3_negative	MEDL01909	1,7-Bis(4-hydroxyphenyl)-3-heptanone	Phenolic acids	Phenolic acids	C19H22O3	297.154	298.157	8.2871	[M-H]-	11.2356	1	0.733	rp	130233-83-9	14608480	HMDB0138216	-	-	B	43692.6	62822.9	62315	49282.4	48657.9	48515.9	63661.5	63587.4	62492.1	-
T3_negative	MEDL01837	Nordihydrocapsiate	Phenolic acids	Phenolic acids	C17H26O4	293.178	294.183	6.3904	[M-H]-	5.92745	1	0.9663	rp	-	9817607	HMDB0034779	-	-	B	373545	315018	409708	436341	375304	532211	433156	433402	438492	-
T3_positive	MEDP2241	SPH(d17:1)	SP	SPH	C17H35NO2	286.271	285.267	5.8769	[M+H]+	6.62851	2	0.8088	rp	6918-48-5	5283557	-	41557	-	A	5569.47	5301.29	5782.88	1156.13	1210.61	770.971	3716.36	3724.8	3709.45	-
T3_positive	MW0056748	N-Palmitoylsphingomyelin	SP	SM	C39H79N2O6P	703.566	702.568	6.2255	[M+H]+	13.0693	2	0.8668	rp	6254-89-3	9939941	HMDB0010169	-	-	A	29702.4	30433.5	48971.2	173069	43210.7	81267.5	93629.1	108080	104895	-
T3_positive	MEDP1685	Phytosphingosine	SP	SPH	C18H39NO3	318.297	317.293	5.4434	[M+H]+	8.19558	1	0.8956	rp	554-62-1	122121	HMDB0004610	7066	C12144	A	523746	438219	501112	291530	327433	444459	445285	441234	445037	ko00600,ko01100
T3_positive	MW0110977	Dehydrophytosphingosine (not validated, isomer of 1677)	SP	SPH	C18H37NO3	316.281	315.277	5.9995	[M+H]+	10.681	3	0.728	rp	3687-54-5	14757419	HMDB0038057	-	-	A	2363.3	2029.42	2583.39	1141.2	1845.58	2292.48	1726.16	1674.94	1779.37	-
T3_positive	MW0055241	N-acetylsphingosine	SP	SPH	C20H39NO3	342.304	341.293	6.9245	[M+H]+	8.86981	2	0.7154	rp	3102-57-6 | 195194-58-2	5497136	-	411	-	A	30049.5	26503.7	20774.5	22155.6	13268.4	16941.8	23133.2	23227.4	22345.9	-
T3_positive	MW0055403	N-Palmitoylsphingosine	SP	Cer	C34H67NO3	520.501	537.512	7.9671	[M+H-H2O]+	16.6622	2	0.7597	rp	24696-26-2	5283564	HMDB0004949	7202	C00195	A	73397.7	61426.9	66857.1	81228.9	57289.7	28239.1	42338.6	42130.5	34912.1	ko00600,ko01100,ko04071,ko04217,ko04722,ko04920,ko04931,ko04933,ko05140,ko05415
T3_positive	MW0055310	N-hexanoylsphingosine	SP	SPH	C24H47NO3	380.345	397.356	6.6936	[M+H-H2O]+	22.487	2	0.7157	rp	124753-97-5	5702613	-	63012	-	A	40028.9	32388.6	39099.6	18464.4	31880.9	36307.3	28418.8	28656.3	28362.4	-
T3_positive	MW0111288	Sphingosine	SP	SM	C18H37NO2	300.286	299.282	6.1613	[M+H]+	8.09371	1	0.929	rp	123-78-4	5280335	HMDB0000252	-	C00319	A	22508.1	25340.3	36560.8	20627.6	23539.4	12682.6	25421.7	25404.1	25306	ko00600,ko01100,ko04071,ko04210,ko04217
T3_positive	MW0055340	N-(9Z-octadecenoyl)-sphing-4-enine-1-phosphocholine	SP	SM	C41H81N2O6P	728.593	728.583	7.6422	[M+]+	9.22869	2	0.7615	rp	108392-10-5	6443882	HMDB0012101	-	-	A	43498.8	8210.51	10298.1	4563.88	851.064	37036.8	41379.3	40989.8	41489.7	-
T3_positive	MW0063555	N-[2-[[[[(2S,3R)-2-(Hexadecanoylamino)-3-hydroxy-4-octadecenyl]oxy]hydroxyphosphinyl]oxy]ethyl]trimethylaminium	SP	SM	C39H80N2O6P+	703.567	703.575	6.819	[M+H]+	3.82295	2	0.9349	rp	-	5283590	HMDB0010169	-	-	A	3.9344e+06	823298	47732.3	430177	429674	3.67701e+06	1.04078e+06	939210	1.06914e+06	-
T3_positive	MW0194315	1-beta-D-Galactosylsphingosine	SP	SP	C24H47NO7	462.335	461.335	6.9425	[M+H]+	9.66765	2	0.8042	rp	-	91746255	HMDB0000648	-	-	A	7770.1	7717.63	9308.13	4140.72	6499.82	1995.22	4425.76	4437.09	4313.38	-
T3_negative	MW0063622	Sphingosine 1-phosphate	SP	SM	C18H38NO5P	378.239	379.249	6.4858	[M-H]-	6.64469	1	0.7113	rp	26993-30-6	5283560	HMDB0000277	-	C06124	A	10969.3	13068.3	27984.2	15158.9	17109.2	24545.4	8199.41	8628.54	9202.4	ko00600,ko01100,ko04020,ko04071,ko04072,ko04080,ko04371,ko04666,ko05152
HILIC_negative	MW0017012	Cerebroside B	SP	GSP	C41H77NO9	726.546	727.56	0.8878	[M-H]-	6.54583	3	0.7072	hilic	88642-46-0	10010147	HMDB0035990	-	-	A	267134	242904	310643	236288	289786	307599	247021	250882	253495	-
HILIC_negative	MW0055404	C16-0(Palmitoyl)ceramide	SP	Cer	C34H67NO3	582.512	537.512	0.8006	[M+HCOO]-	4.31434	3	0.7766	hilic	4201-58-5 | 24696-26-2	5353456	HMDB0000790	-	C00195	A	503522	494168	393336	471215	339862	514403	371881	376992	375900	ko00600,ko01100,ko04071,ko04217,ko04722,ko04920,ko04931,ko04933,ko05140,ko05415
HILIC_negative	MW0055212	CerP(d18:1/24:0)	SP	Cer	C42H84NO6P	764.549	729.604	1.0662	[M+Cl]-	14.4682	2	0.7353	hilic	-	5283587	HMDB0010704	-	C00195	A	19856.9	21984	45663.8	40929.9	24590	39533.7	52487.7	55289.6	55631.7	ko00600,ko01100,ko04071,ko04217,ko04722,ko04920,ko04931,ko04933,ko05140,ko05415
HILIC_negative	MW0017001	Cer(d18:1/24:1(15Z))	SP	Cer	C42H81NO3	646.615	647.622	0.8085	[M-H]-	0.997034	4	0.9757	hilic	-	5283568	HMDB0004953	7206	C00195	A	9356.59	6087.46	5245.11	6022.23	4540.15	6316.3	7068.46	6464.45	7165.75	ko00600,ko01100,ko04071,ko04217,ko04722,ko04920,ko04931,ko04933,ko05140,ko05415
T3_positive	MW0015996	Aucubin	Steroids	Steroid	C15H22O9	369.108	346.126	2.1155	[M+Na]+	18.4502	2	0.7859	rp	479-98-1	91458	-	-	C09771	B	5649.33	5873.41	7789.04	6854.32	7621.62	6554.54	7603.77	7546.09	7417.85	-
T3_negative	MW0016972	Cellobiotol	Steroids	Steroid	C12H24O11	403.153	344.132	5.8787	[M+CH3COO]-	9.62239	2	0.7156	rp	535-94-4	160514	-	44376	-	B	2456.03	2594.92	3232.49	1763.47	1989.25	2755.36	2488.47	2490.37	2525.59	-
T3_positive	MW0103193	Zedoarondiol	Terpenoids	Sesquiterpenoids	C15H24O3	275.158	252.173	6.978	[M+Na]+	8.86175	4	0.821	rp	98644-24-7	14632997	HMDB0036448	-	-	B	15818.8	16205.4	16280.8	9843.51	16099	10637.9	9866.05	10001.6	9960.52	-
T3_positive	MW0157403	Simplexin, 22,23,24,25-tetradehydro-	Terpenoids	Ditepenoids	C30H40O8	529.27	528.272	6.7117	[M+H]+	16.5009	3	0.733	rp	92219-48-2 | 52306-12-4	5477859	-	-	-	B	3201.79	3932.29	3384.92	3508.81	2987.04	3684.93	3353.54	3408.97	3501.05	-
T3_positive	MW0155739	Presilphiperfolan-8beta-ol	Terpenoids	Sesquiterpenoids	C15H26O	289.15	222.198	7.101	[M-2H+3Na]+	3.675	3	0.8545	rp	80931-08-4	10775424	-	-	C19756	B	11566.2	10398.1	10713.1	5973.8	8757.82	6037.81	5913.54	5779.92	5766.38	-
[truncated: 15 more rows]
