# Supplementary material for: Targeting mitochondrial phosphatidylethanolamine alters mitochondrial metabolism and proliferation in hepatocellular carcinoma
Source: Research Square preprint supplement (doi:10.21203/rs.3.rs-7042684/v1), 2025-07-15
Supplement: Supplementary file 2 [file ec6243d0bdcf12fed6ee8122.xlsx]

## Sheet: shee1
Supplemental Table 1. Lipidomics analysis of mouse liver tumor vs. adjacent non-tumor tissue. Data are in pmol.
Index	Compounds	Class I	Class II	Length of carbon chain	Unsaturation of carbon chain	Q1 (Da)	Molecular Weight	Ionization model	Formula	Male Non-Tumor 1	Male Non-Tumor Control 2	Male Non-Tumor 3	Female Non-Tumor 1	Female Non-Tumor 2	Female Non-Tumor 3	Male Tumor 1	Male Tumor 2	Male Tumor 3	Female Tumor 1	Female Tumor 2	Female Tumor 3	QC01	QC02	QC03	cpd_ID	HMDB	lipidmaps ID	Pubchem CID	CAS	ChEBI	Metlin	kegg_map
LIPID-N-0001	taurolithocholicacid-3-sulfate	ST	BA	-	-	281.1	563.258667	[M-H]-	C26H45NO8S2	7.32	4.64	3.904	5	8.12	10.2	7.32	2.444	5.68	6.12	23.08	6.4	7.04	8.36	9.04	C03642	HMDB0002580	LMST05020003	440071	15324-65-9	440071	-	ko04976
LIPID-N-0016	Taurochenodeoxycholic acid	ST	BA	-	-	498.5	499.296753	[M-H]-	C26H45NO6S	158	70	59.2	2112	992	1128	161.2	32.64	57.6	362	1776	456	520	536	504	C05465	HMDB0000951	LMST05040005	387316	516-35-8	387316	-	ko00120,ko04976,ko04979
LIPID-N-0015	Glycocholic acid	ST	BA	-	-	464.4	465.309052	[M-H]-	C26H43NO6	24.88	25.72	24.16	28.44	42.8	55.2	24.76	19.72	19.52	18.92	118	38.04	33.72	27.24	27.96	C01921	HMDB0000138	LMST05030001	23617285	475-31-0	23617285	-	ko00120,ko01100,ko04976,ko04979
LIPID-N-0014	lithocholicacid-3-sulfate	ST	BA	-	-	455.6	456.254547	[M-H]-	C24H38O3	17.8	12.16	16.68	13.48	8.24	28.88	12.36	8.92	12	14.08	14.4	14.12	17.64	16.24	16.92	-	HMDB0000907	LMST05020015	10253562	34669-57-3	10253562	-	-
LIPID-N-0010	Ursocholic acid	ST	BA	-	-	407.4	408.287567	[M-H]-	C24H40O5	390.8	150.4	157.2	512	333.2	1840	464	54	185.2	64	1100	640	376.8	408	428	C17644	HMDB0000917	LMST04010088	122340	2955-27-3	122340	-	-
LIPID-N-0017	Taurocholic acid	ST	BA	-	-	514.7	515.291687	[M-H]-	C26H45NO7S	126.4	28.4	21.56	328	81.6	412	54.8	30.88	27.72	208	860	300.8	174.4	166.8	168	C05122	HMDB0000036	LMST05040001	6675	81-24-3	6675	-	ko00120,ko00430,ko01100,ko04976,ko04979
LIPID-N-0007	norcholic acid	ST	BA	-	-	393.2	394.271912	[M-H]-	C24H38O3	80.8	83.2	106.8	134.4	139.6	140.8	103.2	118.8	120.8	107.2	728	150	86	81.2	94	-	-	LMST04060019	158738	60696-62-0	-	-	-
LIPID-N-0006	Ursodeoxycholic acid	ST	BA	-	-	391.5	392.292664	[M-H]-	C24H40O4	9.88	17.68	22.4	64.4	39.64	25.36	20.36	37.44	6.12	3.36	60.4	8.84	22.08	22.32	17.48	C07880	HMDB0000946	LMST04010033	31401	128-13-2	31401	-	-
LIPID-N-0005	Chenodeoxycholic acid	ST	BA	-	-	391.5	392.292664	[M-H]-	C24H40O4	33.6	9.6	17.6	20.44	27.84	29.64	11.36	15.44	22.04	3.664	84.4	42	19.68	21.68	19.52	C02528	HMDB0000518	LMST04010032	10133	474-25-9	10133	-	ko00120,ko01100,ko04976
LIPID-N-0009	12-Oxochenodeoxycholic acid	ST	BA	-	-	405.4	406.271912	[M-H]-	C24H38O3	12.96	7.52	5.84	18.72	15.68	38.56	13.68	N/A	N/A	4.96	38.12	7.28	10.32	7.32	9.72	-	-	LMST04010176	94235	-	-	-	-
LIPID-P-1578	BMP(22:6_22:6)	GP	BMP	44	12	884.543611	866.5097856	[M+NH4]+	C50H75O10P	775	26.8	48.7	56.3	127	90	90.7	216	138	55.6	365	101	230	220	167	-	-	-	-	-	-	-	-
LIPID-P-1599	BMP(18:1_22:6)	GP	BMP	40	7	838.5592611	820.5254357	[M+NH4]+	C46H77O10P	694	156.4	246	270	646	626	436	586	258	378	1194	448	452	806	602	-	-	-	-	-	-	-	-
LIPID-P-0031	Carnitine C8:1	FA	CAR	8	1	286.2025765	285.194009	[M+H]+	C15H27NO4	0.02252	0.01808	0.01764	0.01808	0.01292	0.01584	0.01468	0.01076	0.00756	0.01992	0.035	0.01888	0.01788	0.02756	0.02292	C02301	HMDB0013324	LMFA07070014	70679121	-	-	-	ko04714
LIPID-P-0032	Carnitine C8:1-OH	FA	CAR	8	1	302.1974915	301.188924	[M+H]+	C15H27NO5	N/A	0.02132	0.00684	0.0052	N/A	0.01508	0.00816	N/A	0.00648	N/A	0.0772	0.09	0.01812	0.01932	0.02248	C02301	-	LMFA07070038	71464491	-	-	-	ko04714
LIPID-P-0036	Carnitine C12:1-OH	FA	CAR	12	1	358.2603115	357.251524	[M+H]+	C19H35NO5	0.02112	0.0246	0.02444	0.02128	0.02316	0.02568	0.01852	0.02504	0.024	0.0236	0.0604	0.0224	0.01504	0.02596	0.02764	C02301	-	LMFA07070024	71464579	-	-	-	ko04714
LIPID-P-0037	Carnitine C14:1	FA	CAR	14	1	370.2968065	369.287909	[M+H]+	C21H39NO4	0.0428	0.01036	0.015	0.02152	0.03152	0.02332	0.00992	0.0732	0.0464	0.02052	0.412	0.0896	0.048	0.048	0.0608	C02301	HMDB0002014	LMFA07070057	22833575	835598-21-5	-	-	ko04714
LIPID-P-0039	Carnitine C16:1	FA	CAR	16	1	398.3282165	397.319209	[M+H]+	C23H43NO4	0.12	0.0528	0.0792	0.1588	0.4	0.082	0.027	0.1856	0.1632	0.0824	1.204	0.2584	0.1912	0.1992	0.2048	C02301	HMDB0006317	LMFA07070097	53477817	-	-	-	ko04714
LIPID-P-1289	Carnitine C15:1	FA	CAR	15	1	384.311384	383.303559	[M+H]+	C22H41NO4	0.01192	0.03168	0.01556	0.01692	0.01688	0.01232	0.01712	0.0226	0.01488	0.02284	N/A	0.01412	0.01312	0.01592	0.01712	C02301	-	-	-	-	-	-	ko04714
LIPID-P-0045	Carnitine C18:1-OH	FA	CAR	18	1	442.3545415	441.345424	[M+H]+	C25H47NO5	0.02256	0.0126	0.01948	0.02916	0.048	0.015	0.01128	0.02324	0.0456	0.01116	0.508	0.1304	0.056	0.0516	0.0644	C02301	HMDB0013339	LMFA07070025	71464558	-	-	-	ko04714
LIPID-P-0046	Carnitine C10:2	FA	CAR	10	2	312.2182815	311.209659	[M+H]+	C17H29NO4	0.01196	0.01732	0.0106	0.0086	0.0088	0.02944	0.01588	0.0106	0.01616	0.00652	0.02764	0.01832	0.01272	0.01772	0.01836	C02301	-	LMFA07070015	71464496	-	-	-	ko04714
LIPID-P-0049	Carnitine C18:2	FA	CAR	18	2	424.3439215	423.334859	[M+H]+	C25H45NO4	0.02756	0.01336	0.01852	0.02888	0.1048	0.0532	0.01792	0.02112	0.01984	N/A	0.432	0.1636	0.0536	0.0472	0.0568	C02301	HMDB0006469	LMFA07070009	6450015	36816-10-1	-	-	ko04714
LIPID-P-0029	Carnitine C6:1	FA	CAR	6	1	258.1711665	257.162709	[M+H]+	C13H23NO4	0.01152	0.00684	0.00812	0.00476	0.0098	0.00892	0.01216	0.00896	0.00976	0.00464	0.01792	0.01664	0.00928	0.009	0.01348	C02301	HMDB0013161	LMFA07070031	53481638	-	-	-	ko04714
LIPID-P-1290	Carnitine C17:1	FA	CAR	17	1	412.342684	411.334859	[M+H]+	C24H45NO4	0.01528	0.01796	0.01928	0.0316	0.0776	0.0264	0.00972	0.01452	0.02748	0.00788	0.0892	0.04	0.02944	0.03308	0.02512	C02301	-	-	-	-	-	-	ko04714
LIPID-P-1300	Carnitine C20:3	FA	CAR	20	3	450.358334	449.350509	[M+H]+	C27H47NO4	0.001184	0.001548	N/A	N/A	0.00872	0.00436	N/A	0.00632	0.0072	0.0048	0.01616	0.03776	0.0092	0.00844	0.0102	C02301	-	-	-	-	-	-	ko04714
LIPID-P-1302	Carnitine C20:4	FA	CAR	20	4	448.342684	447.334859	[M+H]+	C27H45NO4	0.0492	0.00704	0.02276	0.01996	0.0552	0.0484	0.00876	0.03972	0.076	0.013	0.664	0.2084	0.0844	0.0892	0.084	C02301	-	LMFA07070088	71464486	-	-	-	ko04714
LIPID-P-0040	Carnitine C16:1-OH	FA	CAR	16	1	414.321949	413.314124	[M+H]+	C23H43NO5	0.01928	N/A	0.0224	0.01472	0.03108	0.0668	0.01172	0.02388	0.02156	0.01288	0.3204	0.0392	0.03376	0.03344	0.044	C02301	HMDB0013333	LMFA07070044	71464549	-	-	-	ko04714
LIPID-P-0028	Carnitine C5:1	FA	CAR	5	1	244.1554615	243.147059	[M+H]+	C12H21NO4	0.156	0.0496	0.104	0.1292	0.1796	0.2492	0.0636	0.0756	0.2496	0.00832	0.0684	0.436	0.1468	0.164	0.1948	C02301	HMDB0002366	LMFA07070108	91825636	64681-36-3	-	-	ko04714
LIPID-P-0022	Carnitine C16-OH	FA	CAR	16	0	416.3388365	415.329774	[M+H]+	C23H45NO5	0.0262	0.003588	0.01716	0.02228	0.0368	0.0176	0.00724	0.0306	0.0488	0.01236	0.6	0.1312	0.05	0.0632	0.0696	C02301	HMDB0013336	LMFA07070113	126456228	195207-76-2	-	-	ko04714
LIPID-P-0026	Carnitine C3:1-2OH	FA	CAR	3	1	248.1134123	247.105589	[M+H]+	C10H17NO6	0.01852	0.01688	0.01444	0.01772	0.02132	0.01996	0.014	0.02512	0.02688	0.01788	0.05	0.0504	0.02504	0.02312	0.02676	C02301	HMDB0002095	LMFA07070080	91825606	910825-21-7	-	-	ko04714
LIPID-P-0003	Carnitine C3:0	FA	CAR	3	0	218.1397565	217.131409	[M+H]+	C10H19NO4	0.0448	0.0476	0.0708	0.1508	0.0828	0.0628	0.03824	0.0724	0.06	0.1236	0.288	0.2152	0.0824	0.1116	0.1012	C03017	HMDB0000824	LMFA07070105	107738	17298-37-2	-	-	-
LIPID-P-0004	Carnitine C4:0	FA	CAR	4	0	232.1554615	231.147059	[M+H]+	C11H21NO4	0.1112	0.02028	0.03852	0.0236	0.03052	0.064	0.02052	0.0668	0.1216	0.01724	0.0468	0.1196	0.0588	0.0596	0.062	C02862	HMDB0002013	LMFA07070054	213144	25576-40-3	-	-	-
LIPID-P-0006	Carnitine C4-OH	FA	CAR	4	0	248.1503765	247.141974	[M+H]+	C11H21NO5	0.02368	0.02016	0.01968	0.02256	0.01888	0.01576	0.01724	0.02684	0.02948	0.02304	0.0592	0.0552	0.02724	0.03104	0.0306	C02301	-	LMFA07070071	53481617	-	-	-	ko04714
LIPID-P-0007	Carnitine C6:0	FA	CAR	6	0	260.1868715	259.178359	[M+H]+	C13H25NO4	0.01788	0.02224	0.0158	0.01248	0.02484	0.025	0.01972	0.01496	0.01264	0.003968	0.0576	0.03384	0.02016	0.02344	0.02904	C02301	HMDB0000705	LMFA07070070	6426853	6418-78-6	-	-	ko04714
LIPID-P-0008	Carnitine C5-OH	FA	CAR	5	0	262.1660815	261.157624	[M+H]+	C12H23NO5	0.1268	0.078	0.0768	0.1488	0.1796	0.16	0.0632	0.0968	0.1168	0.0768	0.098	0.3372	0.1396	0.1496	0.1672	C02301	HMDB0062555	LMFA07070073	57357187	-	-	-	ko04714
LIPID-P-0009	Carnitine C6-OH	FA	CAR	6	0	276.1817865	275.173274	[M+H]+	C13H25NO5	0.0456	0.03904	0.03244	0.0272	0.046	0.0756	0.03916	0.03488	0.03912	0.01668	0.03204	0.0612	0.04	0.0504	0.058	C02301	HMDB0013130	LMFA07070072	53481624	102636-82-8	-	-	ko04714
LIPID-P-0010	Carnitine C8:0	FA	CAR	8	0	288.2182815	287.209659	[M+H]+	C15H29NO4	0.01844	0.02732	0.03152	0.04	0.0444	0.0724	0.0532	0.01716	0.03276	0.01668	0.0712	0.0544	0.03532	0.0468	0.0524	C02301	HMDB0000791	LMFA07070095	11953814	25243-95-2	-	-	ko04714
LIPID-P-0027	Carnitine C4:1-2OH	FA	CAR	4	1	262.1290623	261.121239	[M+H]+	C11H19NO6	0.1176	0.0648	0.0656	0.1472	0.1796	0.1568	0.0572	0.0928	0.1148	0.0684	0.0872	0.3376	0.1352	0.1484	0.1624	C02301	HMDB0061717	LMFA07070101	71464481	256928-74-2	-	-	ko04714
LIPID-P-0011	Carnitine C6-2OH	FA	CAR	6	0	290.1609965	289.152539	[M+H]+	C13H23NO6	0.01864	0.01216	0.01244	0.01564	0.01716	0.01844	0.01472	0.02632	0.0238	0.01744	0.02472	0.03272	0.0168	0.02048	0.02024	C02301	HMDB0000552	LMFA07070087	128145	102673-95-0	-	-	ko04714
LIPID-P-0014	Carnitine C12:0	FA	CAR	12	0	344.2811015	343.272259	[M+H]+	C19H37NO4	0.00676	0.002928	0.003128	0.00792	0.01244	0.00652	0.00196	0.00736	0.0088	0.00812	0.0992	0.03508	0.01316	0.01544	0.01016	C02301	HMDB0002250	LMFA07070062	168381	25518-54-1	-	-	ko04714
LIPID-P-0016	Carnitine C12-OH	FA	CAR	12	0	360.2760165	359.267174	[M+H]+	C19H37NO5	8.24	6.4	5.8	8.32	11.04	7.24	7.84	7.64	8.4	9.44	7.6	7.64	9.16	8.04	11.96	C02301	-	LMFA07070039	71464535	-	-	-	ko04714
LIPID-P-0017	Carnitine C14:0	FA	CAR	14	0	372.3125115	371.303559	[M+H]+	C21H41NO4	0.0992	0.02388	0.0452	0.146	0.2492	0.058	0.02488	0.1308	0.1496	0.0936	1.824	0.3248	0.1856	0.192	0.2268	C02301	HMDB0005066	LMFA07070102	53477791	25597-07-3	-	-	ko04714
LIPID-P-0018	Carnitine C15:0	FA	CAR	15	0	386.32504	385.319209	[M+H]+	C22H43NO4	0.0484	0.02728	0.03796	0.0624	0.1296	0.0604	0.02688	0.03764	0.0728	0.02816	0.3	0.0792	0.0664	0.068	0.0872	C02301	-	-	-	-	-	-	ko04714
LIPID-P-0019	Carnitine C12:1-2OH	FA	CAR	12	1	374.2552265	373.246439	[M+H]+	C19H35NO6	0.0112	0.01224	0.00764	0.01064	0.01548	0.01304	0.0114	0.00636	0.00556	0.0062	0.01852	0.01132	0.00892	0.01192	0.01288	C02301	-	LMFA07070083	71464543	-	-	-	ko04714
LIPID-P-0024	Carnitine C20:0	FA	CAR	20	0	456.40433	455.397459	[M+H]+	C27H53NO4	0.0298	0.01704	0.02544	0.0552	0.0888	0.02772	0.0116	0.03064	0.0484	0.02116	0.0744	0.1016	0.03104	0.0472	0.03976	C02301	-	LMFA07070052	53477833	-	-	-	ko04714
LIPID-P-0025	Carnitine C18-OH	FA	CAR	18	0	444.3702465	443.361074	[M+H]+	C25H49NO5	0.01512	0.00548	0.01892	0.02928	0.042	0.01096	0.00888	0.0348	0.0368	0.01668	0.1236	0.0604	0.02904	0.02656	0.03472	C02301	-	LMFA07070043	71464560	-	-	-	ko04714
LIPID-P-0013	Carnitine C10:0	FA	CAR	10	0	316.2496915	315.240959	[M+H]+	C17H33NO4	0.01232	0.01028	0.003948	0.00704	0.00752	0.0358	N/A	0.00532	0.00572	N/A	0.2332	0.0976	0.02112	0.03496	0.03444	C02301	HMDB0000651	LMFA07070059	10245190	1492-27-9	-	-	ko04714
LIPID-P-0002	Carnitine C2:0	FA	CAR	2	0	204.1240515	203.115759	[M+H]+	C9H17NO4	0.2304	0.1268	0.1504	0.1428	0.1612	0.1284	0.126	0.2056	0.3632	0.2156	0.64	0.436	0.1984	0.2396	0.2176	C02571	HMDB0000201	LMFA07070049	7045767	3040-38-8	-	-	ko04931
LIPID-P-0001	DL-Carnitine	FA	CAR	-	-	162.1134315	161.105194	[M+H]+	C7H15NO3	0.672	0.3076	0.3796	0.456	0.476	0.572	0.278	0.684	0.668	0.2316	1.068	2.632	0.76	0.796	0.948	C00318	HMDB0000062	-	10917	541-15-1	-	-	ko04714,ko04976,ko05415
LIPID-P-0056	CE(16:0)	ST	CE	16	0	642.62824	624.58453	[M+NH4]+	C43H76O2	1358	426	1120	820	920	1088	1492	1254	1016	638	430	1920	1332	1570	840	C11251	HMDB0000885	LMST01020005	246520	601-34-3	-	-	-
LIPID-P-0066	CE(18:1)	ST	CE	18	1	668.64394	650.60018	[M+NH4]+	C45H78O2	6620	2120	5580	4020	6520	4740	7820	4700	3320	1764	2400	6500	5840	5720	3880	C14641	HMDB0000918	LMST01020003	50938266	303-43-5	-	-	-
LIPID-P-0057	CE(18:0)	ST	CE	18	0	670.65954	652.61583	[M+NH4]+	C45H80O2	420	N/A	642	604	532	606	278	364	342	270	196.6	734	618	700	434	C02530	HMDB0010368	LMST01020007	53480457	-	-	-	ko00100,ko04913,ko04975,ko04976,ko04977,ko04979,ko05417
LIPID-P-1503	Cer(d18:0/22:1(2OH))	SP	Cer-ADS	40	1	638.608734	637.600909	[M+H]+	C40H79NO4	8.5	8.55	10.7	20.2	36.5	13.1	8.56	13.1	9.42	2.65	6.09	10.1	13.9	18.4	20.2	C12126	-	-	138176132	-	-	-	ko00600,ko01100,ko04071
LIPID-P-1993	Cer(t26:1/12:1(2OH))	SP	Cer-AP	38	2	606.5455805	623.5488745	[M-H2O+H]+	C38H73NO5	43.1	8.94	13.9	13.5	28.8	31.3	13.5	30.3	43.6	22.2	37.6	14.9	19.9	17.5	30.2	C12145	-	-	138255395	-	-	-	ko00600,ko01100
LIPID-P-1996	Cer(t26:2/32:2(2OH))	SP	Cer-AP	58	4	882.8272816	899.8305756	[M-H2O+H]+	C58H109NO5	62.7	10.4	13.8	N/A	11.9	14.2	2.27	24	28.1	3.16	64.6	17.2	17.4	29	24.5	C12145	-	-	138125309	-	-	-	ko00600,ko01100
LIPID-P-1997	Cer(t26:2/34:2(2OH))	SP	Cer-AP	60	4	910.8585817	927.8618757	[M-H2O+H]+	C60H113NO5	261	23.8	40	18	23.4	51.2	47.7	162	128	14.1	355	68.2	99.4	88.9	104	C12145	-	-	138131787	-	-	-	ko00600,ko01100
LIPID-P-2000	Cer(t30:0/18:1(2OH))	SP	Cer-AP	48	1	748.7177312	765.7210252	[M-H2O+H]+	C48H95NO5	95.5	34.7	86.3	35.1	122	114	40.6	77	130	10	170	78.9	78.5	85.5	122	C12145	-	-	138194288	-	-	-	ko00600,ko01100
LIPID-P-1962	Cer(t18:2/42:2(2OH))	SP	Cer-AP	60	4	910.8585817	927.8618757	[M-H2O+H]+	C60H113NO5	70.6	6.48	8.73	3.88	19.7	16.9	6.11	14.5	24.9	4.58	49	28	26.1	22.4	29.1	C12145	-	-	138163789	-	-	-	ko00600,ko01100
LIPID-P-1961	Cer(t18:2/40:2(2OH))	SP	Cer-AP	58	4	882.8272816	899.8305756	[M-H2O+H]+	C58H109NO5	255	31.5	43.8	27.1	68.3	70.4	37.4	132	174	18.3	266	110	91.6	106	147	C12145	-	-	138168457	-	-	-	ko00600,ko01100
LIPID-P-1960	Cer(t18:2/38:2(2OH))	SP	Cer-AP	56	4	854.7959815	871.7992755	[M-H2O+H]+	C56H105NO5	189	14.6	29.2	28.8	42.7	45.7	40.6	79.5	71.2	4.41	100	52.8	46.1	46.6	71.1	C12145	-	-	138304651	-	-	-	ko00600,ko01100
LIPID-P-1981	Cer(t22:1/34:2(2OH))	SP	Cer-AP	56	3	856.8116315	873.8149255	[M-H2O+H]+	C56H107NO5	139	29	34.6	30.4	80.8	44.4	34.2	78.5	105	13.6	71.4	69.1	48.1	61.7	82	C12145	-	-	138310237	-	-	-	ko00600,ko01100
LIPID-P-1992	Cer(t24:2/34:2(2OH))	SP	Cer-AP	58	4	882.8272816	899.8305756	[M-H2O+H]+	C58H109NO5	206	23.5	46.1	18.1	62.4	77.5	44.2	112	142	12.3	204	72.2	84	94.5	130	C12145	-	-	138253036	-	-	-	ko00600,ko01100
LIPID-P-1957	Cer(t18:1/40:2(2OH))	SP	Cer-AP	58	3	884.8429317	901.8462257	[M-H2O+H]+	C58H111NO5	140	22.2	42	24.8	38.5	41.5	32.8	144	145	12.2	73.3	72.6	56.2	74.2	94.2	C12145	-	-	138284848	-	-	-	ko00600,ko01100
LIPID-P-1956	Cer(t18:1/38:2(2OH))	SP	Cer-AP	56	3	856.8116315	873.8149255	[M-H2O+H]+	C56H107NO5	445	89.8	115	75	164	159	128	325	273	49.5	194	146	139	201	247	C12145	-	-	138270422	-	-	-	ko00600,ko01100
LIPID-P-1954	Cer(t18:1/36:2(2OH))	SP	Cer-AP	54	3	828.7803314	845.7836254	[M-H2O+H]+	C54H103NO5	128	15	28.7	22.4	49.5	30	23	43.9	61	11.5	62.5	34.6	26.1	30.5	37.9	C12145	-	-	138153536	-	-	-	ko00600,ko01100
LIPID-P-1951	Cer(t18:1/20:1(2OH))	SP	Cer-AP	38	2	606.5455805	623.5488745	[M-H2O+H]+	C38H73NO5	50.9	11.1	12	12.6	25.5	29.2	11.3	25.6	35.2	25	41	18.1	25.5	23.5	38.5	C12145	-	-	138188888	-	-	-	ko00600,ko01100
LIPID-P-1949	Cer(t18:0/20:1(2OH))	SP	Cer-AP	38	1	608.5612305	625.5645245	[M-H2O+H]+	C38H75NO5	19.4	2.57	6.25	5.21	10.7	4.35	N/A	51.2	38.1	6.44	4.96	5.15	9.14	14.6	11.5	C12145	-	-	138288693	-	-	-	ko00600,ko01100
LIPID-P-1958	Cer(t18:2/36:2(2OH))	SP	Cer-AP	54	4	826.7646814	843.7679754	[M-H2O+H]+	C54H101NO5	32.4	3.19	4.94	N/A	9.65	3.81	5.99	7.78	14.6	N/A	13.2	6.15	9.39	10.4	14.1	C12145	-	-	138231866	-	-	-	ko00600,ko01100
LIPID-P-1947	Cer(t17:1/21:0(2OH))	SP	Cer-AP	38	1	608.5612305	625.5645245	[M-H2O+H]+	C38H75NO5	11.2	10.1	9.61	4.52	4.31	6.82	8.2	36.1	11.7	17.3	N/A	4.49	14.1	13.6	13.6	C12145	-	-	138242045	-	-	-	ko00600,ko01100
LIPID-P-1991	Cer(t24:2/16:2(2OH))	SP	Cer-AP	40	4	630.5455805	647.5488745	[M-H2O+H]+	C40H73NO5	75.1	68.8	95.1	78.9	185	105	64.1	188	149	41.8	45.5	61.4	138	137	156	C12145	-	-	138161737	-	-	-	ko00600,ko01100
LIPID-P-1989	Cer(t24:1/34:2(2OH))	SP	Cer-AP	58	3	884.8429317	901.8462257	[M-H2O+H]+	C58H111NO5	445	58.5	77.2	45.9	98.8	111	71.8	353	288	45.4	187	116	130	169	204	C12145	-	-	138266209	-	-	-	ko00600,ko01100
LIPID-P-1967	Cer(t20:1/40:2(2OH))	SP	Cer-AP	60	3	912.8742318	929.8775258	[M-H2O+H]+	C60H115NO5	352	36.8	54.7	24.8	52.2	53.7	42.3	229	267	23.9	130	119	112	112	145	C12145	-	-	138269583	-	-	-	ko00600,ko01100
LIPID-P-1968	Cer(t20:2/18:0(2OH))	SP	Cer-AP	38	2	606.5455805	623.5488745	[M-H2O+H]+	C38H73NO5	57.9	14.5	13.1	16.9	40.6	26.2	10.7	34.6	39.3	31.3	50	28.1	26.6	30.2	45.7	C12145	-	-	138310231	-	-	-	ko00600,ko01100
LIPID-P-1969	Cer(t20:2/18:1(2OH))	SP	Cer-AP	38	3	604.5299304	621.5332244	[M-H2O+H]+	C38H71NO5	24.5	12.1	16	19.5	43.7	27.2	14.4	60.1	33.7	13.4	15.6	16	38.9	30.7	48.7	C12145	-	-	138262235	-	-	-	ko00600,ko01100
LIPID-P-1972	Cer(t20:2/34:2(2OH))	SP	Cer-AP	54	4	826.7646814	843.7679754	[M-H2O+H]+	C54H101NO5	90.2	6.01	7.15	4.65	8.06	15.4	3.99	24.4	24.8	1.7	84.1	4.74	13.3	22.2	23.4	C12145	-	-	138162459	-	-	-	ko00600,ko01100
LIPID-P-1973	Cer(t20:2/36:1(2OH))	SP	Cer-AP	56	3	856.8116315	873.8149255	[M-H2O+H]+	C56H107NO5	344	31.6	46.8	16.2	68.2	78.8	34.3	132	258	31	397	94.5	81	131	128	C12145	-	-	138277540	-	-	-	ko00600,ko01100
LIPID-P-1974	Cer(t20:2/36:2(2OH))	SP	Cer-AP	56	4	854.7959815	871.7992755	[M-H2O+H]+	C56H105NO5	660	74.2	94.9	40.3	112	124	77.3	218	332	40.3	646	165	174	208	229	C12145	-	-	138279636	-	-	-	ko00600,ko01100
LIPID-P-1975	Cer(t20:2/38:1(2OH))	SP	Cer-AP	58	3	884.8429317	901.8462257	[M-H2O+H]+	C58H111NO5	125	12.7	16.1	10	28.8	25.2	20.1	30.5	73.1	9.31	162	41	47.4	39.4	55.1	C12145	-	-	138215484	-	-	-	ko00600,ko01100
LIPID-P-1976	Cer(t20:2/38:2(2OH))	SP	Cer-AP	58	4	882.8272816	899.8305756	[M-H2O+H]+	C58H109NO5	2660	370	511	241	770	812	490	1350	2020	152	3070	1200	927	1180	1460	C12145	-	-	138200132	-	-	-	ko00600,ko01100
LIPID-P-1977	Cer(t20:2/40:1(2OH))	SP	Cer-AP	60	3	912.8742318	929.8775258	[M-H2O+H]+	C60H115NO5	47.6	2.66	6.94	7.05	13	13.7	4.33	8.68	43.7	2.26	105	16.4	17.2	20.5	23.2	C12145	-	-	138122282	-	-	-	ko00600,ko01100
LIPID-P-1978	Cer(t20:2/40:2(2OH))	SP	Cer-AP	60	4	910.8585817	927.8618757	[M-H2O+H]+	C60H113NO5	662	70.8	83.1	53.2	143	222	82.4	211	427	45.5	694	284	274	258	284	C12145	-	-	138210499	-	-	-	ko00600,ko01100
LIPID-P-1980	Cer(t22:1/16:1(2OH))	SP	Cer-AP	38	2	606.5455805	623.5488745	[M-H2O+H]+	C38H73NO5	12.5	2.73	4.09	3.68	7.05	11	2.94	16.7	19.9	7.12	15.4	6.1	9.03	12.2	9.61	C12145	-	-	138237628	-	-	-	ko00600,ko01100
LIPID-P-1964	Cer(t20:0/18:2(2OH))	SP	Cer-AP	38	2	606.5455805	623.5488745	[M-H2O+H]+	C38H73NO5	23.2	2.41	4.81	4.47	7.92	9.89	1.47	7.7	7.75	6.98	14.5	5.22	9.31	6.84	11	C12145	-	-	138241317	-	-	-	ko00600,ko01100
LIPID-P-1982	Cer(t22:1/38:2(2OH))	SP	Cer-AP	60	3	912.8742318	929.8775258	[M-H2O+H]+	C60H115NO5	438	64	104	30.9	66.7	96.3	73.3	589	316	70.3	212	107	157	169	215	C12145	-	-	138209965	-	-	-	ko00600,ko01100
LIPID-P-1983	Cer(t22:2/34:2(2OH))	SP	Cer-AP	56	4	854.7959815	871.7992755	[M-H2O+H]+	C56H105NO5	38.3	4.72	10.8	2.64	5.85	6.4	9.34	23	26.2	3.66	37	12.5	9.74	15.6	16.9	C12145	-	-	138192280	-	-	-	ko00600,ko01100
LIPID-P-1984	Cer(t22:2/36:1(2OH))	SP	Cer-AP	58	3	884.8429317	901.8462257	[M-H2O+H]+	C58H111NO5	134	15.6	19.1	11.7	33.9	18.6	25	65.1	75	7.4	195	27.3	39.7	62.4	45.2	C12145	-	-	138247548	-	-	-	ko00600,ko01100
LIPID-P-1985	Cer(t22:2/38:2(2OH))	SP	Cer-AP	60	4	910.8585817	927.8618757	[M-H2O+H]+	C60H113NO5	988	108	152	59.8	133	231	149	513	519	54.4	1280	225	344	376	493	C12145	-	-	138199357	-	-	-	ko00600,ko01100
LIPID-P-1986	Cer(t22:2/40:2(2OH))	SP	Cer-AP	62	4	938.8898819	955.8931759	[M-H2O+H]+	C62H117NO5	137	15.7	17	12.6	33	28.4	17.7	66.4	86.9	5.7	148	58	52.2	48.1	61.1	C12145	-	-	138142549	-	-	-	ko00600,ko01100
LIPID-P-1988	Cer(t24:1/32:2(2OH))	SP	Cer-AP	56	3	856.8116315	873.8149255	[M-H2O+H]+	C56H107NO5	131	24.5	22.3	21.6	35.2	24.8	18	89.2	54.2	10.8	51.9	34.2	31.8	39.1	44.6	C12145	-	-	138145779	-	-	-	ko00600,ko01100
LIPID-P-1990	Cer(t24:2/16:1(2OH))	SP	Cer-AP	40	3	632.5612305	649.5645245	[M-H2O+H]+	C40H75NO5	31.6	59.9	53.7	65.9	66.6	35.1	26.3	155	82.9	32.1	11.6	35.2	75.9	76.4	103	C12145	-	-	138264684	-	-	-	ko00600,ko01100
LIPID-P-1943	Cer(t15:0/18:1(2OH))	SP	Cer-AP	33	1	538.4829802	555.4862742	[M-H2O+H]+	C33H65NO5	18.5	20.3	N/A	N/A	N/A	N/A	16.7	N/A	6.77	12.5	31.9	N/A	40.8	41.6	63.1	C12145	-	-	138162551	-	-	-	ko00600,ko01100
LIPID-P-1965	Cer(t20:1/36:2(2OH))	SP	Cer-AP	56	3	856.8116315	873.8149255	[M-H2O+H]+	C56H107NO5	339	64	78.4	41.8	90.3	101	54	260	165	35.8	141	104	89.7	106	127	C12145	-	-	138258018	-	-	-	ko00600,ko01100
LIPID-P-1966	Cer(t20:1/38:2(2OH))	SP	Cer-AP	58	3	884.8429317	901.8462257	[M-H2O+H]+	C58H111NO5	1740	299	366	209	435	442	313	1470	1140	196	735	533	519	652	877	C12145	-	-	138158904	-	-	-	ko00600,ko01100
LIPID-P-2588	Cer(d24:3/33:0(2OH))	SP	Cer-AS	57	3	854.832367	871.835661	[M-H2O+H]+	C57H109NO4	54.1	5.89	5.43	3.25	15	16	9.92	12.9	32.5	N/A	40.6	22.8	10	17.4	17.1	C02960	-	-	138179878	-	-	-	ko00600,ko01100
LIPID-P-2615	Cer(d27:2/36:2(2OH))	SP	Cer-AS	63	4	936.9106173	953.9139113	[M-H2O+H]+	C63H119NO4	73	4.53	10.4	2.64	8.23	10.6	6.74	22	37.1	3.22	62.6	19.1	22.2	22.3	23.7	C02960	-	-	138216010	-	-	-	ko00600,ko01100
LIPID-P-2616	Cer(d27:3/32:0(2OH))	SP	Cer-AS	59	3	882.8636671	899.8669611	[M-H2O+H]+	C59H113NO4	77.8	7.01	17.6	7.95	12.8	14.7	9.69	55.7	42.3	3.23	11.8	12.7	28.6	34.7	41.5	C02960	-	-	138284670	-	-	-	ko00600,ko01100
LIPID-P-2618	Cer(d28:1/29:1(2OH))	SP	Cer-AS	57	2	856.8480171	873.8513111	[M-H2O+H]+	C57H111NO4	86.5	9.2	13.2	12.7	28.6	17.5	21.4	48.4	49.5	3.46	38.9	43.7	17.1	27.7	30.2	C02960	-	-	138291038	-	-	-	ko00600,ko01100
LIPID-P-2619	Cer(d28:2/29:0(2OH))	SP	Cer-AS	57	2	856.8480171	873.8513111	[M-H2O+H]+	C57H111NO4	134	27.4	30.6	20.1	44.4	39.2	21.3	81.3	68.7	8.17	51.2	38.6	46.7	30.6	49.4	C02960	-	-	138236185	-	-	-	ko00600,ko01100
LIPID-P-2620	Cer(d28:2/31:0(2OH))	SP	Cer-AS	59	2	884.8793172	901.8826112	[M-H2O+H]+	C59H115NO4	165	31	42.6	30.8	48.3	41.2	34.8	98.2	146	20	46.9	65.6	56.1	66.7	72.9	C02960	-	-	138213052	-	-	-	ko00600,ko01100
LIPID-P-2621	Cer(d28:2/31:1(2OH))	SP	Cer-AS	59	3	882.8636671	899.8669611	[M-H2O+H]+	C59H113NO4	123	14.2	28.1	15.1	33.3	19.9	8.46	72.1	55.3	9.05	19.6	36.7	30.5	45.7	54.7	C02960	-	-	138303425	-	-	-	ko00600,ko01100
LIPID-P-2623	Cer(d29:1/28:0(2OH))	SP	Cer-AS	57	1	858.8636671	875.8669611	[M-H2O+H]+	C57H113NO4	83.1	32.4	17.9	25.1	38.2	28.6	22.8	63.3	40	10.8	39.4	30.6	29.7	29.4	46.7	C02960	-	-	138216320	-	-	-	ko00600,ko01100
LIPID-P-2624	Cer(d29:1/28:1(2OH))	SP	Cer-AS	57	2	856.8480171	873.8513111	[M-H2O+H]+	C57H111NO4	96.2	14.9	29.9	18.4	41.9	36.5	31.4	52.5	45.5	4.44	54	27.6	37.9	44.4	61.6	C02960	-	-	138287503	-	-	-	ko00600,ko01100
LIPID-P-2626	Cer(d29:1/30:0(2OH))	SP	Cer-AS	59	1	886.8949673	903.8982613	[M-H2O+H]+	C59H117NO4	96.9	19.7	36.4	38.6	40.7	42.3	31.3	99.2	89.4	29.1	36.2	46.7	48.4	58.9	59.8	C02960	-	-	138269542	-	-	-	ko00600,ko01100
LIPID-P-2627	Cer(d29:1/30:2(2OH))	SP	Cer-AS	59	3	882.8636671	899.8669611	[M-H2O+H]+	C59H113NO4	130	18.7	23	18.5	33.1	25.7	19.3	46.2	78.6	15.7	54.4	34.9	25.4	45	42.3	C02960	-	-	138245737	-	-	-	ko00600,ko01100
LIPID-P-2628	Cer(d29:2/28:0(2OH))	SP	Cer-AS	57	2	856.8480171	873.8513111	[M-H2O+H]+	C57H111NO4	125	16.4	24.4	19.9	37.3	26.1	19.9	45.4	68.1	4.96	48	46.7	30.5	46.2	49.4	C02960	-	-	138169149	-	-	-	ko00600,ko01100
LIPID-P-2629	Cer(d29:2/30:0(2OH))	SP	Cer-AS	59	2	884.8793172	901.8826112	[M-H2O+H]+	C59H115NO4	142	25.2	46.5	30.4	54.9	58.1	41	141	138	23.7	70.3	55.7	52.9	70.7	81.2	C02960	-	-	138184782	-	-	-	ko00600,ko01100
LIPID-P-2630	Cer(d29:2/30:1(2OH))	SP	Cer-AS	59	3	882.8636671	899.8669611	[M-H2O+H]+	C59H113NO4	104	9.75	31.9	14.8	36.9	18.7	15.3	46.6	27.3	12	27.7	23.8	35.8	37.9	29.4	C02960	-	-	138210790	-	-	-	ko00600,ko01100
LIPID-P-2632	Cer(d30:1/27:1(2OH))	SP	Cer-AS	57	2	856.8480171	873.8513111	[M-H2O+H]+	C57H111NO4	83.4	12.6	23	15.3	25.1	31.8	8.95	61.6	60.2	11.7	43.2	37.2	26.8	33.6	44.1	C02960	-	-	138123488	-	-	-	ko00600,ko01100
LIPID-P-2633	Cer(d30:1/29:0(2OH))	SP	Cer-AS	59	1	886.8949673	903.8982613	[M-H2O+H]+	C59H117NO4	73.5	17.4	15.9	17.5	26	24.4	16	72	71.6	15.7	28.2	26.9	22.2	37.5	40.1	C02960	-	-	138313185	-	-	-	ko00600,ko01100
LIPID-P-2634	Cer(d30:1/29:1(2OH))	SP	Cer-AS	59	2	884.8793172	901.8826112	[M-H2O+H]+	C59H115NO4	103	19.8	33.6	16.2	29.4	42.5	28	80.9	97.9	21.9	45.7	40	33.7	47.2	44.5	C02960	-	-	138154487	-	-	-	ko00600,ko01100
LIPID-P-2635	Cer(d30:2/29:0(2OH))	SP	Cer-AS	59	2	884.8793172	901.8826112	[M-H2O+H]+	C59H115NO4	185	22.3	50	20.7	55.2	51.3	33.3	99.1	129	14.8	63	61.2	40.6	50.8	69.2	C02960	-	-	138210688	-	-	-	ko00600,ko01100
LIPID-P-2614	Cer(d27:2/34:2(2OH))	SP	Cer-AS	61	4	908.8793172	925.8826112	[M-H2O+H]+	C61H115NO4	58.6	5.4	6.98	4.49	13.1	23.1	9.81	45.8	35	4.89	103	25.6	31.8	27	28.2	C02960	-	-	138160527	-	-	-	ko00600,ko01100
LIPID-P-2612	Cer(d27:2/32:1(2OH))	SP	Cer-AS	59	3	882.8636671	899.8669611	[M-H2O+H]+	C59H113NO4	115	17.4	31.4	18.3	36.9	29.1	20.6	73.1	92.6	9.02	58	30.4	40.7	57.4	62.8	C02960	-	-	138169383	-	-	-	ko00600,ko01100
LIPID-P-2611	Cer(d27:2/30:1(2OH))	SP	Cer-AS	57	3	854.832367	871.835661	[M-H2O+H]+	C57H109NO4	29.6	5.87	9.73	6.03	12.3	12.6	4.65	20.9	18.5	6.16	12.5	9.65	12.1	14.3	11.1	C02960	-	-	138260057	-	-	-	ko00600,ko01100
LIPID-P-2610	Cer(d27:2/30:0(2OH))	SP	Cer-AS	57	2	856.8480171	873.8513111	[M-H2O+H]+	C57H111NO4	100	19.7	21.5	20.5	47	43.7	31.5	63.3	77	15.5	58.3	43.4	46.7	51.3	64.6	C02960	-	-	138318130	-	-	-	ko00600,ko01100
LIPID-P-1563	Cer(d18:1/24:1(2OH))	SP	Cer-AS	42	2	664.624384	663.616559	[M+H]+	C42H81NO4	658	12.9	21.8	25.5	112	62.4	7.25	262	199	7.64	80.9	50.6	136	132	200	C02960	-	-	138240952	-	-	-	ko00600,ko01100
LIPID-P-1553	Cer(d17:1/16:0(2OH))	SP	Cer-AS	33	1	540.499184	539.491359	[M+H]+	C33H65NO4	39.2	18.4	31.2	21.7	37.3	33.5	19.3	61.1	48.7	32.8	19.7	20.1	22.9	29.4	27.6	C02960	-	-	138213530	-	-	-	ko00600,ko01100
LIPID-P-2590	Cer(d25:1/32:1(2OH))	SP	Cer-AS	57	2	856.8480171	873.8513111	[M-H2O+H]+	C57H111NO4	52.4	10.3	13.6	7.18	20.4	15.2	8.9	31	41.9	7.07	23.8	17.3	19.1	26.5	31.4	C02960	-	-	138279580	-	-	-	ko00600,ko01100
LIPID-P-2592	Cer(d25:1/34:2(2OH))	SP	Cer-AS	59	3	882.8636671	899.8669611	[M-H2O+H]+	C59H113NO4	78.2	14.4	23.5	15.1	28.9	22.4	16.7	53.7	47.4	5.78	59	26.9	31.3	37.8	49.7	C02960	-	-	138182887	-	-	-	ko00600,ko01100
LIPID-P-2636	Cer(d30:2/29:1(2OH))	SP	Cer-AS	59	3	882.8636671	899.8669611	[M-H2O+H]+	C59H113NO4	93.3	16.4	14.6	14.4	13.6	18.2	13.2	71.4	73.5	4.37	51.6	33	20.9	32.9	36.5	C02960	-	-	138147161	-	-	-	ko00600,ko01100
LIPID-P-2594	Cer(d25:2/34:1(2OH))	SP	Cer-AS	59	3	882.8636671	899.8669611	[M-H2O+H]+	C59H113NO4	160	22.5	33.5	20.1	41.5	49.1	25.1	117	103	11.1	78.6	51.5	51.1	71.4	92.3	C02960	-	-	138142393	-	-	-	ko00600,ko01100
LIPID-P-2589	Cer(d25:1/32:0(2OH))	SP	Cer-AS	57	1	858.8636671	875.8669611	[M-H2O+H]+	C57H113NO4	32.7	17.4	18.9	18.1	17.6	21.8	17.2	33.4	37.9	9.3	22.4	16.4	22.7	26.2	37.6	C02960	-	-	138264098	-	-	-	ko00600,ko01100
LIPID-P-2596	Cer(d25:2/36:1(2OH))	SP	Cer-AS	61	3	910.8949673	927.8982613	[M-H2O+H]+	C61H117NO4	81.1	16.7	11.9	6.89	16.5	12.9	9.71	91	86.8	11.4	37.7	32.7	22.8	34	35	C02960	-	-	138212885	-	-	-	ko00600,ko01100
LIPID-P-2599	Cer(d26:1/31:0(2OH))	SP	Cer-AS	57	1	858.8636671	875.8669611	[M-H2O+H]+	C57H113NO4	61.6	16.3	24.8	17.8	21.7	42.1	20.2	61.7	42.2	13.6	19.8	20.9	36.4	37.7	39.8	C02960	-	-	138176938	-	-	-	ko00600,ko01100
LIPID-P-2601	Cer(d26:2/31:0(2OH))	SP	Cer-AS	57	2	856.8480171	873.8513111	[M-H2O+H]+	C57H111NO4	99.7	19.3	18.1	18.7	43.5	33.2	19.3	54.5	57.3	6.23	50.4	29.7	45.1	53.6	46.9	C02960	-	-	138282522	-	-	-	ko00600,ko01100
LIPID-P-2602	Cer(d26:2/33:1(2OH))	SP	Cer-AS	59	3	882.8636671	899.8669611	[M-H2O+H]+	C59H113NO4	123	20	21.2	15.3	21.5	26.4	18.8	62	52.9	8.27	55.9	38.5	26	31.4	27.6	C02960	-	-	138210308	-	-	-	ko00600,ko01100
LIPID-P-2603	Cer(d26:3/33:0(2OH))	SP	Cer-AS	59	3	882.8636671	899.8669611	[M-H2O+H]+	C59H113NO4	117	16	25.1	8.72	16.2	25.4	13.1	67	67.6	7.72	110	18.5	40.7	42.6	58.3	C02960	-	-	138157276	-	-	-	ko00600,ko01100
LIPID-P-2605	Cer(d26:3/35:1(2OH))	SP	Cer-AS	61	4	908.8793172	925.8826112	[M-H2O+H]+	C61H115NO4	103	13.8	21.2	4.71	14.5	17.3	17.7	69.1	75	6.73	163	41.9	47.9	51.7	52.3	C02960	-	-	138304504	-	-	-	ko00600,ko01100
LIPID-P-2606	Cer(d27:1/30:0(2OH))	SP	Cer-AS	57	1	858.8636671	875.8669611	[M-H2O+H]+	C57H113NO4	75.6	22.2	23.5	27.4	48.3	33.1	29	84	74.7	13.4	37.7	38.4	41.6	46.5	65.2	C02960	-	-	138193540	-	-	-	ko00600,ko01100
LIPID-P-2597	Cer(d25:3/34:0(2OH))	SP	Cer-AS	59	3	882.8636671	899.8669611	[M-H2O+H]+	C59H113NO4	74.8	12.7	16.7	10.4	15.9	10.3	11.2	39.7	42.9	5.61	37.7	13.8	16.9	20.2	25.7	C02960	-	-	138285141	-	-	-	ko00600,ko01100
LIPID-P-1565	Cer(d18:2/16:0(2OH))	SP	Cer-AS	34	2	552.499184	551.491359	[M+H]+	C34H65NO4	20.3	5.73	8.51	10.1	12.5	7.9	1.67	17.2	12.8	2.91	N/A	5.12	10.8	11.9	14	C02960	-	-	15609679	-	-	-	ko00600,ko01100
LIPID-P-2584	Cer(d24:2/35:0(2OH))	SP	Cer-AS	59	2	884.8793172	901.8826112	[M-H2O+H]+	C59H115NO4	540	102	127	80	122	151	116	373	418	47.6	211	162	189	181	238	C02960	-	-	138216026	-	-	-	ko00600,ko01100
LIPID-P-2474	Cer(d14:3/27:1(2OH))	SP	Cer-AS	41	4	628.5663159	645.5696099	[M-H2O+H]+	C41H75NO4	559	331	401	294	607	627	279	547	653	78.9	483	504	533	650	844	C02960	-	-	138230583	-	-	-	ko00600,ko01100
LIPID-P-2534	Cer(d18:2/40:1(2OH))	SP	Cer-AS	58	3	868.8480171	885.8513111	[M-H2O+H]+	C58H111NO4	127	49.5	79.2	44	99.9	108	94.2	120	113	26.1	81.6	140	85.5	83.5	120	C02960	-	-	138140473	-	-	-	ko00600,ko01100
LIPID-P-2535	Cer(d18:2/40:2(2OH))	SP	Cer-AS	58	4	866.832367	883.835661	[M-H2O+H]+	C58H109NO4	410	167	202	117	168	199	189	399	345	35.6	139	377	170	219	258	C02960	-	-	138209193	-	-	-	ko00600,ko01100
LIPID-P-2536	Cer(d18:2/42:2(2OH))	SP	Cer-AS	60	4	894.8636671	911.8669611	[M-H2O+H]+	C60H113NO4	159	47.9	79.7	54.7	87.4	110	75.8	150	173	13.8	111	184	106	105	122	C02960	-	-	138202242	-	-	-	ko00600,ko01100
LIPID-P-2550	Cer(d19:3/40:0(2OH))	SP	Cer-AS	59	3	882.8636671	899.8669611	[M-H2O+H]+	C59H113NO4	70.4	7.69	25.8	12.2	11.8	28	13.4	47.5	53.2	7.45	34.4	21.8	21.4	32.6	34.1	C02960	-	-	138212972	-	-	-	ko00600,ko01100
LIPID-P-2555	Cer(d20:1/24:0(2OH))	SP	Cer-AS	44	1	676.6602163	693.6635103	[M-H2O+H]+	C44H87NO4	38.8	38.5	41.5	35	56.5	62.3	41.4	83.4	87	28.3	54.2	44.4	67	43.1	77.3	C02960	-	-	12988913	-	-	-	ko00600,ko01100
LIPID-P-2557	Cer(d20:1/24:2(2OH))	SP	Cer-AS	44	3	672.6289162	689.6322102	[M-H2O+H]+	C44H83NO4	12.5	6.93	19.6	12.3	14	26.2	12	25.3	16.8	10.7	10.2	13.8	18.1	19.1	19.1	C02960	-	-	138195811	-	-	-	ko00600,ko01100
LIPID-P-2559	Cer(d21:1/36:0(2OH))	SP	Cer-AS	57	1	858.8636671	875.8669611	[M-H2O+H]+	C57H113NO4	53.7	16.8	16.2	14.9	25.1	29.3	17	43.9	43.8	11.3	29.3	32.2	22.7	30.4	38.6	C02960	-	-	138128042	-	-	-	ko00600,ko01100
LIPID-P-2560	Cer(d21:1/36:1(2OH))	SP	Cer-AS	57	2	856.8480171	873.8513111	[M-H2O+H]+	C57H111NO4	49.7	10.1	8.71	6.28	19.4	14.5	8.27	43.8	36.9	6.28	15.5	16.7	9.11	15.7	16.6	C02960	-	-	138314627	-	-	-	ko00600,ko01100
LIPID-P-2561	Cer(d21:1/38:1(2OH))	SP	Cer-AS	59	2	884.8793172	901.8826112	[M-H2O+H]+	C59H115NO4	94.8	24.7	15.8	15.5	38.8	22.1	14.5	90.9	81.9	13.7	31.9	26.8	25.8	39.5	32.1	C02960	-	-	138219490	-	-	-	ko00600,ko01100
LIPID-P-2563	Cer(d21:2/36:0(2OH))	SP	Cer-AS	57	2	856.8480171	873.8513111	[M-H2O+H]+	C57H111NO4	69.2	21.6	27	6.61	37.5	34.9	14.6	51.2	61.6	2.98	45.9	23.7	22.6	20.8	23.3	C02960	-	-	138262180	-	-	-	ko00600,ko01100
LIPID-P-2564	Cer(d21:2/38:1(2OH))	SP	Cer-AS	59	3	882.8636671	899.8669611	[M-H2O+H]+	C59H113NO4	141	19.7	27.6	10.4	24	37.2	13.2	87.9	79.8	6.34	50.9	40.6	33	37.9	55.5	C02960	-	-	138216177	-	-	-	ko00600,ko01100
LIPID-P-2565	Cer(d21:2/38:2(2OH))	SP	Cer-AS	59	4	880.8480171	897.8513111	[M-H2O+H]+	C59H111NO4	96.7	30.1	33	34.7	58.7	73.6	35.2	117	101	29.9	82.7	44.5	60.7	67.7	79.8	C02960	-	-	138241632	-	-	-	ko00600,ko01100
LIPID-P-2532	Cer(d18:2/23:1(2OH))	SP	Cer-AS	41	3	630.581966	647.58526	[M-H2O+H]+	C41H77NO4	229	88.7	188	104	345	339	106	295	390	30.5	508	557	271	371	438	C02960	-	-	138287153	-	-	-	ko00600,ko01100
LIPID-P-2566	Cer(d21:3/38:0(2OH))	SP	Cer-AS	59	3	882.8636671	899.8669611	[M-H2O+H]+	C59H113NO4	83.2	15.5	9.54	12.8	23.9	22.9	21.3	41.4	57.5	9.48	38	23.4	33.4	34.2	44.1	C02960	-	-	138291662	-	-	-	ko00600,ko01100
LIPID-P-2569	Cer(d22:1/35:0(2OH))	SP	Cer-AS	57	1	858.8636671	875.8669611	[M-H2O+H]+	C57H113NO4	66.8	19.4	19.1	25.7	21.8	22.3	15.6	44.5	51.9	10.1	30.3	31.4	20.5	32.7	37.9	C02960	-	-	138147748	-	-	-	ko00600,ko01100
LIPID-P-2570	Cer(d22:1/35:1(2OH))	SP	Cer-AS	57	2	856.8480171	873.8513111	[M-H2O+H]+	C57H111NO4	55.2	12.2	19.5	12.3	15.2	24.7	17.9	34.8	40.8	4.34	18.6	26.5	15.6	16.8	23.8	C02960	-	-	138156037	-	-	-	ko00600,ko01100
LIPID-P-2571	Cer(d22:2/35:1(2OH))	SP	Cer-AS	57	3	854.832367	871.835661	[M-H2O+H]+	C57H109NO4	74.8	11.6	12.9	7.38	25.9	25.1	16.8	30.6	34.2	3.79	30.4	25	25.9	32	33.5	C02960	-	-	138198224	-	-	-	ko00600,ko01100
LIPID-P-2573	Cer(d23:2/34:0(2OH))	SP	Cer-AS	57	2	856.8480171	873.8513111	[M-H2O+H]+	C57H111NO4	68	12.1	21.7	17.3	28.5	16.3	14.6	26.9	65	4.44	27.5	24.5	20.3	31.3	27.7	C02960	-	-	138195894	-	-	-	ko00600,ko01100
LIPID-P-2575	Cer(d23:2/36:1(2OH))	SP	Cer-AS	59	3	882.8636671	899.8669611	[M-H2O+H]+	C59H113NO4	115	16.8	25.6	11.2	31.4	18.8	17.3	55.6	46	5.74	33	29.3	22.7	41	37.5	C02960	-	-	138199608	-	-	-	ko00600,ko01100
LIPID-P-2577	Cer(d23:3/36:0(2OH))	SP	Cer-AS	59	3	882.8636671	899.8669611	[M-H2O+H]+	C59H113NO4	68.5	9.13	12.6	5.56	25.9	15.6	11.5	40.6	61.7	N/A	22.1	23.7	16.5	24.3	25.7	C02960	-	-	138126583	-	-	-	ko00600,ko01100
LIPID-P-2579	Cer(d24:1/18:0(2OH))	SP	Cer-AS	42	1	648.6289162	665.6322102	[M-H2O+H]+	C42H83NO4	2660	1070	1460	1470	2590	2540	986	2800	2850	1610	825	504	1760	1910	2640	C02960	-	-	138122520	-	-	-	ko00600,ko01100
LIPID-P-2582	Cer(d24:1/35:1(2OH))	SP	Cer-AS	59	2	884.8793172	901.8826112	[M-H2O+H]+	C59H115NO4	70.4	15	18	10.7	18.6	17.4	13.1	38.5	58.5	9.82	13.1	10.7	28.1	32.2	42.4	C02960	-	-	138169698	-	-	-	ko00600,ko01100
LIPID-P-2583	Cer(d24:2/33:0(2OH))	SP	Cer-AS	57	2	856.8480171	873.8513111	[M-H2O+H]+	C57H111NO4	174	23.9	37.3	18.4	55.5	58.8	28.8	100	82.4	15.2	62.1	40.6	45.4	60.6	77.7	C02960	-	-	138289609	-	-	-	ko00600,ko01100
LIPID-P-2567	Cer(d21:3/38:2(2OH))	SP	Cer-AS	59	5	878.832367	895.835661	[M-H2O+H]+	C59H109NO4	35.9	6.37	14.9	21	20.6	19	13.3	21.9	26.8	5.23	26.6	9.29	12.7	18.4	23.5	C02960	-	-	138238233	-	-	-	ko00600,ko01100
LIPID-P-2531	Cer(d18:2/22:0(2OH))	SP	Cer-AS	40	2	618.581966	635.58526	[M-H2O+H]+	C40H77NO4	96.2	32.6	82.7	74.3	190	225	36.9	122	152	8.54	132	158	99.5	111	156	C02960	-	-	25245218	-	-	-	ko00600,ko01100
LIPID-P-2527	Cer(d18:1/42:2(2OH))	SP	Cer-AS	60	3	896.8793172	913.8826112	[M-H2O+H]+	C60H115NO4	467	102	137	78.7	146	126	126	349	328	35	89.2	168	154	188	259	C02960	-	-	138243091	-	-	-	ko00600,ko01100
LIPID-P-2526	Cer(d18:1/42:1(2OH))	SP	Cer-AS	60	2	898.8949673	915.8982613	[M-H2O+H]+	C60H117NO4	181	55.6	78.1	77	108	84.5	93.2	89.6	161	14.9	91.4	92.5	105	119	121	C02960	-	-	138194826	-	-	-	ko00600,ko01100
LIPID-P-2476	Cer(d15:1/42:1(2OH))	SP	Cer-AS	57	2	856.8480171	873.8513111	[M-H2O+H]+	C57H111NO4	37.9	4.11	3.63	3.83	14.8	14.6	9.2	32.9	13.6	3.91	6.34	15	18.2	13.4	17	C02960	-	-	138206271	-	-	-	ko00600,ko01100
LIPID-P-2478	Cer(d15:2/42:0(2OH))	SP	Cer-AS	57	2	856.8480171	873.8513111	[M-H2O+H]+	C57H111NO4	64.6	11.2	21	16.1	25.5	26	9.7	54.5	41.3	8.84	27.6	22	24.5	33.8	35.8	C02960	-	-	138257813	-	-	-	ko00600,ko01100
LIPID-P-2482	Cer(d17:1/15:1(2OH))	SP	Cer-AS	32	2	506.4567654	523.4600594	[M-H2O+H]+	C32H61NO4	83	15.7	25	29.1	84.7	69.4	19.9	129	87.7	9.97	38.6	27	40	60.9	41.9	C02960	-	-	138311178	-	-	-	ko00600,ko01100
LIPID-P-2484	Cer(d17:1/16:2(2OH))	SP	Cer-AS	33	3	518.4567654	535.4600594	[M-H2O+H]+	C33H61NO4	23	6.51	13.3	13.5	18.5	15.2	7.4	29.5	15.7	8.21	22.7	12.8	11.3	14.2	16.3	C02960	-	-	138184977	-	-	-	ko00600,ko01100
LIPID-P-2487	Cer(d17:1/40:0(2OH))	SP	Cer-AS	57	1	858.8636671	875.8669611	[M-H2O+H]+	C57H113NO4	68.7	10.8	19.7	10.7	12.4	18.3	16	56.3	36.4	5.31	31.2	21.3	23.7	35.1	30.8	C02960	-	-	138237346	-	-	-	ko00600,ko01100
LIPID-P-2488	Cer(d17:1/40:1(2OH))	SP	Cer-AS	57	2	856.8480171	873.8513111	[M-H2O+H]+	C57H111NO4	30.3	12.3	22.1	5.66	22.8	12.2	12.1	33	25.5	3.02	8.28	12.8	12.2	17.9	10.5	C02960	-	-	138197361	-	-	-	ko00600,ko01100
LIPID-P-2489	Cer(d17:1/42:0(2OH))	SP	Cer-AS	59	1	886.8949673	903.8982613	[M-H2O+H]+	C59H117NO4	18.6	5.94	1.75	11	10.8	8.6	8.87	16.7	41	9.15	5.21	8.43	11.8	17.2	15.5	C02960	-	-	138302779	-	-	-	ko00600,ko01100
LIPID-P-2586	Cer(d24:3/15:1(2OH))	SP	Cer-AS	39	4	600.5350158	617.5383098	[M-H2O+H]+	C39H71NO4	62	25.1	23.9	16.8	28.1	29.4	22.9	54.6	56	61.2	49	24.8	28.4	35.6	41.9	C02960	-	-	138151147	-	-	-	ko00600,ko01100
LIPID-P-2493	Cer(d17:2/40:0(2OH))	SP	Cer-AS	57	2	856.8480171	873.8513111	[M-H2O+H]+	C57H111NO4	118	26.5	35.7	20.6	38.3	48.7	30	72.1	68.7	15.3	67.5	27.8	38.1	39.3	44.7	C02960	-	-	138223535	-	-	-	ko00600,ko01100
LIPID-P-2494	Cer(d17:2/42:0(2OH))	SP	Cer-AS	59	2	884.8793172	901.8826112	[M-H2O+H]+	C59H115NO4	232	51	61	44.4	83.2	85.5	54.1	232	196	32.1	90.9	76.1	78.3	100	139	C02960	-	-	138202209	-	-	-	ko00600,ko01100
LIPID-P-2495	Cer(d17:2/42:1(2OH))	SP	Cer-AS	59	3	882.8636671	899.8669611	[M-H2O+H]+	C59H113NO4	222	16.3	28.6	22.7	48.8	45.6	31.7	130	147	20.3	82.9	57.7	46.2	63.3	68	C02960	-	-	138156141	-	-	-	ko00600,ko01100
LIPID-P-2497	Cer(d17:3/42:1(2OH))	SP	Cer-AS	59	4	880.8480171	897.8513111	[M-H2O+H]+	C59H111NO4	66.7	10.4	5.32	4.94	12.8	14.3	9.91	23.6	31.8	N/A	58.2	9.02	22.1	23.9	28.4	C02960	-	-	138155400	-	-	-	ko00600,ko01100
LIPID-P-2499	Cer(d18:1/13:1(2OH))	SP	Cer-AS	31	2	492.4411154	509.4444094	[M-H2O+H]+	C31H59NO4	24.2	2.5	3.62	3.82	15.8	12.1	3.76	23.8	19.1	3.01	N/A	3.31	8.26	6.94	12	C02960	-	-	138252295	-	-	-	ko00600,ko01100
LIPID-P-2500	Cer(d18:1/15:0(2OH))	SP	Cer-AS	33	1	522.4880656	539.4913596	[M-H2O+H]+	C33H65NO4	18.3	5.89	6.88	4.58	11.8	12.3	3.22	24.9	14.2	9.9	7.42	7.87	9.99	14.5	15.8	C02960	-	-	59593559	-	-	-	ko00600,ko01100
LIPID-P-2501	Cer(d18:1/15:1(2OH))	SP	Cer-AS	33	2	520.4724155	537.4757095	[M-H2O+H]+	C33H63NO4	945	170	214	197	353	352	138	1170	580	132	201	414	370	391	417	C02960	-	-	138258561	-	-	-	ko00600,ko01100
LIPID-P-2503	Cer(d18:1/16:1(2OH))	SP	Cer-AS	34	2	534.4880656	551.4913596	[M-H2O+H]+	C34H65NO4	38	11.7	20.1	19.5	51.1	39.6	18.9	43.6	53.1	13.7	28.9	22	22.2	31.4	35.9	C02960	-	-	138214341	-	-	-	ko00600,ko01100
LIPID-P-2506	Cer(d18:1/18:0(2OH))	SP	Cer-AS	36	1	564.5350158	581.5383098	[M-H2O+H]+	C36H71NO4	101	21.2	29	22	42.4	58	21.5	84.4	54.8	10.3	34.9	31.2	32.5	32.1	50.1	C02960	-	-	138315087	-	-	-	ko00600,ko01100
LIPID-P-2510	Cer(d18:1/21:0(2OH))	SP	Cer-AS	39	1	606.581966	623.58526	[M-H2O+H]+	C39H77NO4	2210	1170	2710	845	1970	2340	1280	1770	3550	175	2520	2010	1960	2300	3070	C02960	-	-	138165993	-	-	-	ko00600,ko01100
LIPID-P-2511	Cer(d18:1/21:1(2OH))	SP	Cer-AS	39	2	604.5663159	621.5696099	[M-H2O+H]+	C39H75NO4	317	209	329	122	329	184	160	249	425	12.3	91.3	589	327	386	496	C02960	-	-	138171610	-	-	-	ko00600,ko01100
LIPID-P-2514	Cer(d18:1/22:2(2OH))	SP	Cer-AS	40	3	616.5663159	633.5696099	[M-H2O+H]+	C40H75NO4	72.3	17.2	21.9	17.2	33	40.4	10.4	72.7	53.7	3.38	29.6	54.8	47	49.1	64.1	C02960	-	-	138307318	-	-	-	ko00600,ko01100
LIPID-P-2521	Cer(d18:1/38:1(2OH))	SP	Cer-AS	56	2	842.832367	859.835661	[M-H2O+H]+	C56H109NO4	60.6	30	27.4	18.4	25.9	18.4	31.5	27.6	58.2	5.6	14.1	40.1	27.1	35.5	44.1	C02960	-	-	138266921	-	-	-	ko00600,ko01100
LIPID-P-2522	Cer(d18:1/38:2(2OH))	SP	Cer-AS	56	3	840.8167169	857.8200109	[M-H2O+H]+	C56H107NO4	503	321	325	110	175	175	238	329	394	28.7	116	249	206	281	350	C02960	-	-	138309218	-	-	-	ko00600,ko01100
LIPID-P-2523	Cer(d18:1/40:0(2OH))	SP	Cer-AS	58	1	872.8793172	889.8826112	[M-H2O+H]+	C58H115NO4	107	50.6	84.9	63.1	111	97.6	79.3	72.1	92.5	16.5	88.3	67.6	68.1	89	104	C02960	-	-	138245908	-	-	-	ko00600,ko01100
LIPID-P-2524	Cer(d18:1/40:1(2OH))	SP	Cer-AS	58	2	870.8636671	887.8669611	[M-H2O+H]+	C58H113NO4	465	162	218	115	177	205	197	368	346	28.5	132	219	171	197	276	C02960	-	-	138241382	-	-	-	ko00600,ko01100
LIPID-P-2525	Cer(d18:1/40:2(2OH))	SP	Cer-AS	58	3	868.8480171	885.8513111	[M-H2O+H]+	C58H111NO4	4360	1470	2020	1070	1890	1610	1950	3260	3900	272	1220	2270	1800	2120	2530	C02960	-	-	138164871	-	-	-	ko00600,ko01100
LIPID-P-2585	Cer(d24:2/35:1(2OH))	SP	Cer-AS	59	3	882.8636671	899.8669611	[M-H2O+H]+	C59H113NO4	240	33.3	50.5	27.3	61.2	65.7	43.3	169	175	27	108	63.7	50.7	77.8	90.8	C02960	-	-	138222565	-	-	-	ko00600,ko01100
LIPID-P-2490	Cer(d17:1/42:1(2OH))	SP	Cer-AS	59	2	884.8793172	901.8826112	[M-H2O+H]+	C59H115NO4	78.5	13.5	18	12	14.3	22.5	15.8	50.4	39.8	7.7	9.85	21.6	23.5	19.2	32.7	C02960	-	-	138205629	-	-	-	ko00600,ko01100
LIPID-P-2637	Cer(d30:3/29:0(2OH))	SP	Cer-AS	59	3	882.8636671	899.8669611	[M-H2O+H]+	C59H113NO4	143	18.9	19.7	12.9	36.4	41	27.2	66.8	94.7	12	70.6	39.9	40.5	38.4	49.1	C02960	-	-	138307609	-	-	-	ko00600,ko01100
LIPID-P-2013	Cer(d17:0/18:0)	SP	Cer-NDS	35	0	536.5401012	553.5433952	[M-H2O+H]+	C35H71NO3	360	137	155	125	146	168	125	399	257	219	155	115	144	175	241	C12126	-	-	132994412	-	-	-	ko00600,ko01100,ko04071
LIPID-P-2017	Cer(d18:0/18:1)	SP	Cer-NDS	36	1	548.5401012	565.5433952	[M-H2O+H]+	C36H71NO3	254	34.4	56.5	68.3	168	172	54.5	157	272	30	100	89.5	105	129	127	C12126	-	-	6442401	-	-	-	ko00600,ko01100,ko04071
LIPID-P-0107	Cer(d18:0/24:1)	SP	Cer-NDS	42	1	650.6	649.637294	[M+H]+	C42H83NO3	127	17.3	41.8	28.5	186	129	19.4	45.6	86.5	8.83	98.9	187	56.3	60.9	94.6	C12126	HMDB0011769	LMSP02020011	5283576	-	-	-	ko00600,ko01100,ko04071
LIPID-P-2005	Cer(d16:0/18:0)	SP	Cer-NDS	34	0	522.5244511	539.5277451	[M-H2O+H]+	C34H69NO3	276	31.1	50.7	37.4	105	86	50.2	165	121	27.9	108	101	56	77.1	84.5	C12126	-	-	11049813	-	-	-	ko00600,ko01100,ko04071
LIPID-P-2006	Cer(d16:0/18:1)	SP	Cer-NDS	34	1	520.508801	537.512095	[M-H2O+H]+	C34H67NO3	542	60.1	126	80.9	239	205	115	381	327	66.9	145	125	134	185	160	C12126	-	-	51348997	-	-	-	ko00600,ko01100,ko04071
LIPID-P-2030	Cer(d24:0/18:1)	SP	Cer-NDS	42	1	632.6340015	649.6372955	[M-H2O+H]+	C42H83NO3	113	19.9	30.3	22.5	62.3	47	16.5	99.9	85.8	10.4	45.3	104	42.9	65.1	73.9	C12126	-	-	164265031	-	-	-	ko00600,ko01100,ko04071
LIPID-P-2029	Cer(d24:0/18:0)	SP	Cer-NDS	42	0	634.6496516	651.6529456	[M-H2O+H]+	C42H85NO3	137	46.9	99.4	73.6	218	157	39.8	104	163	12.4	416	275	134	180	226	C12126	-	-	138160842	-	-	-	ko00600,ko01100,ko04071
LIPID-P-2028	Cer(d23:0/18:1)	SP	Cer-NDS	41	1	618.6183515	635.6216455	[M-H2O+H]+	C41H81NO3	64.2	18.8	29.9	38.4	122	80.4	21	79.7	88	10.5	47.3	45.7	58.8	73.2	104	C12126	-	-	164376488	-	-	-	ko00600,ko01100,ko04071
LIPID-P-0102	Cer(d18:0/16:0)	SP	Cer-NDS	34	0	540.535569	539.527744	[M+H]+	C34H69NO3	139	13.4	21.7	15.9	34.4	35.8	16.1	57.7	61.9	15.9	44.6	44.7	21.8	38.7	28.8	C12126	HMDB0011760	LMSP02020001	5283572	5966-29-0	-	-	ko00600,ko01100,ko04071
LIPID-P-2026	Cer(d22:0/21:1)	SP	Cer-NDS	43	1	646.6496516	663.6529456	[M-H2O+H]+	C43H85NO3	22.2	5.58	12.2	16.5	15.9	23.9	7.71	30.6	26.6	7.42	26.7	24.9	20.5	14.8	26.5	C12126	-	-	164305003	-	-	-	ko00600,ko01100,ko04071
LIPID-P-2024	Cer(d20:0/18:2)	SP	Cer-NDS	38	2	574.5557512	591.5590452	[M-H2O+H]+	C38H73NO3	5.63	6.85	12.8	6.37	20.3	22.2	6.99	15	24.3	N/A	15.4	27.8	13.7	17	24.2	C12126	-	-	164309309	-	-	-	ko00600,ko01100,ko04071
LIPID-P-2019	Cer(d18:0/19:1)	SP	Cer-NDS	37	1	562.5557512	579.5590452	[M-H2O+H]+	C37H73NO3	20.1	13.2	12.6	7.48	21.7	19.8	10.5	20.1	17.1	19.4	20.7	9.56	29.4	16.9	28.8	C12126	-	-	138231761	-	-	-	ko00600,ko01100,ko04071
LIPID-P-2023	Cer(d20:0/18:0)	SP	Cer-NDS	38	0	578.5870513	595.5903453	[M-H2O+H]+	C38H77NO3	17	4	6.41	4.14	26	22.7	6.52	11.1	30.2	1.74	26.7	24.8	16.2	21.2	19.5	C12126	-	-	21259879	-	-	-	ko00600,ko01100,ko04071
LIPID-P-2020	Cer(d18:0/23:0)	SP	Cer-NDS	41	0	620.6340015	637.6372955	[M-H2O+H]+	C41H83NO3	243	75.7	202	154	324	350	95.7	213	348	21.4	222	167	211	226	346	C12126	-	-	53817918	-	-	-	ko00600,ko01100,ko04071
LIPID-P-2027	Cer(d23:0/18:0)	SP	Cer-NDS	41	0	620.6340015	637.6372955	[M-H2O+H]+	C41H83NO3	49.8	5.53	21.6	27.2	63	52.4	13.6	22.6	72.6	10.2	25.2	28.9	37.7	37.8	58.4	C12126	-	-	138184889	-	-	-	ko00600,ko01100,ko04071
LIPID-P-2021	Cer(d18:0/24:2)	SP	Cer-NDS	42	2	630.6183515	647.6216455	[M-H2O+H]+	C42H81NO3	52.4	19.8	41.8	22.8	62.2	59.4	21.3	65.1	97.6	7.34	79.8	59.3	46.1	56.3	75.2	C12126	-	-	164192622	-	-	-	ko00600,ko01100,ko04071
LIPID-P-1548	Cer(t18:1/24:0)	SP	Cer-NP	42	1	666.640034	665.632209	[M+H]+	C42H83NO4	32.6	6.9	15.6	7	43.2	33.9	6.89	18.2	19.6	8.61	68.4	59.4	24	38.5	33.6	C12145	-	LMSP02010140	14757369	-	-	-	ko00600,ko01100
LIPID-P-1540	Cer(t18:0/18:0)	SP	Cer-NP	36	0	584.530484	583.553959	[M+H]+	C36H73NO4	25	7.71	8.79	2.69	8.56	5.31	4.84	16.6	21.9	3.36	4.48	5.68	6.57	11.4	8.74	C12145	-	LMSP02030006	9898642	-	-	-	ko00600,ko01100
LIPID-P-2428	Cer(t17:2/20:2)	SP	Cer-NP	37	4	572.5037156	589.5070096	[M-H2O+H]+	C37H67NO4	46.6	10.3	26.1	29.3	59.6	36.2	14.5	41.2	36.1	11.6	20.4	16.3	27.4	38.6	43.9	C12145	-	-	138286494	-	-	-	ko00600,ko01100
LIPID-P-2430	Cer(t17:2/22:1)	SP	Cer-NP	39	3	602.5506658	619.5539598	[M-H2O+H]+	C39H73NO4	401	699	676	317	816	440	312	1410	973	244	338	283	529	749	802	C12145	-	-	138170622	-	-	-	ko00600,ko01100
LIPID-P-2436	Cer(t17:2/31:0)	SP	Cer-NP	48	2	730.7071665	747.7104605	[M-H2O+H]+	C48H93NO4	109	24.8	38.7	32.9	46.1	41.9	32.4	103	68.3	15.5	27.7	37.2	40.7	50.3	58.3	C12145	-	-	138226622	-	-	-	ko00600,ko01100
LIPID-P-2437	Cer(t17:2/33:0)	SP	Cer-NP	50	2	758.7384666	775.7417606	[M-H2O+H]+	C50H97NO4	976	151	204	187	426	313	220	736	602	78.1	145	328	264	349	389	C12145	-	-	138199101	-	-	-	ko00600,ko01100
LIPID-P-2438	Cer(t17:2/35:0)	SP	Cer-NP	52	2	786.7697667	803.7730607	[M-H2O+H]+	C52H101NO4	276	41.9	77.4	89	181	145	83.4	193	213	34.4	76.6	168	86.9	134	155	C12145	-	-	138143475	-	-	-	ko00600,ko01100
LIPID-P-2441	Cer(t18:0/15:1)	SP	Cer-NP	33	1	522.4880656	539.4913596	[M-H2O+H]+	C33H65NO4	9.76	10.1	3.19	N/A	4.49	N/A	5.88	3.71	3.41	13.4	18.1	2.34	28.1	29.6	37.5	C12145	-	-	138271916	-	-	-	ko00600,ko01100
LIPID-P-2442	Cer(t18:0/16:0)	SP	Cer-NP	34	0	556.5299357	555.5226597	[M+H]+	C34H69NO4	35.4	2.94	9.15	18.6	43.1	21.8	11.1	33.2	20.8	6.02	15.6	13.3	23.3	22.8	33.6	C12145	-	-	9807776	-	-	-	ko00600,ko01100
LIPID-P-2445	Cer(t18:0/22:0)	SP	Cer-NP	40	0	640.6238361	639.6165601	[M+H]+	C40H81NO4	78.1	26.4	75.7	48.3	86.6	89.9	26.8	69.4	109	8.28	67.3	47.6	62.9	75.2	68.2	C12145	-	-	14757379	-	-	-	ko00600,ko01100
LIPID-P-2446	Cer(t18:0/23:1)	SP	Cer-NP	41	1	634.6132661	651.6165601	[M-H2O+H]+	C41H81NO4	38.2	1.76	6.87	3.71	6.96	7.08	4.17	20.6	19.2	N/A	7.99	5.78	11.1	9.98	11.8	C12145	-	-	138172146	-	-	-	ko00600,ko01100
LIPID-P-2451	Cer(t18:1/15:1)	SP	Cer-NP	33	2	520.4724155	537.4757095	[M-H2O+H]+	C33H63NO4	51.5	5.39	21.4	12	58.4	24.9	13.2	60.9	48.5	11	34.9	33	29.2	33	21.2	C12145	-	-	138236462	-	-	-	ko00600,ko01100
LIPID-P-2455	Cer(t18:1/32:1)	SP	Cer-NP	50	2	758.7384666	775.7417606	[M-H2O+H]+	C50H97NO4	52.3	9.56	11.8	9.93	30.4	18	19.9	43.7	44.3	4.6	9.32	24.5	23.6	28.8	29.1	C12145	-	-	138306608	-	-	-	ko00600,ko01100
LIPID-P-2464	Cer(t21:2/18:1)	SP	Cer-NP	39	3	602.5506658	619.5539598	[M-H2O+H]+	C39H73NO4	10.5	21.2	26.6	25.7	45.9	33.2	22.1	13.1	31.1	4.62	48	18.5	35.1	29.1	39	C12145	-	-	138232591	-	-	-	ko00600,ko01100
LIPID-P-2465	Cer(t24:0/18:0)	SP	Cer-NP	42	0	650.6445662	667.6478602	[M-H2O+H]+	C42H85NO4	124	25.4	38.7	67.4	165	128	16.4	88.6	130	20.7	155	216	78.3	64	104	C12145	-	-	138127487	-	-	-	ko00600,ko01100
LIPID-P-2439	Cer(t17:2/35:1)	SP	Cer-NP	52	3	784.7541167	801.7574107	[M-H2O+H]+	C52H99NO4	1110	129	198	170	366	246	163	851	679	98.9	115	320	254	330	313	C12145	-	-	138296566	-	-	-	ko00600,ko01100
LIPID-P-2425	Cer(t17:2/18:0)	SP	Cer-NP	35	2	548.5037156	565.5070096	[M-H2O+H]+	C35H67NO4	47.6	22.6	28.5	42.7	54.3	31	26.9	71	59.8	18.2	29.2	73.1	45	63.2	57.3	C12145	-	-	138312481	-	-	-	ko00600,ko01100
LIPID-P-2432	Cer(t17:2/24:0)	SP	Cer-NP	41	2	632.597616	649.60091	[M-H2O+H]+	C41H79NO4	201	49.8	82	79	328	184	47.8	253	309	24.8	243	235	235	219	306	C12145	-	-	138225849	-	-	-	ko00600,ko01100
LIPID-P-2421	Cer(t17:1/26:0)	SP	Cer-NP	43	1	662.6445662	679.6478602	[M-H2O+H]+	C43H85NO4	32.5	9.88	12.9	8.27	16.1	20.2	10	35.7	22.2	12	22.9	14.5	17.9	25.6	20.5	C12145	-	-	138304620	-	-	-	ko00600,ko01100
LIPID-P-2422	Cer(t17:2/16:0)	SP	Cer-NP	33	2	520.4724155	537.4757095	[M-H2O+H]+	C33H63NO4	835	162	318	247	844	331	208	1720	917	213	150	180	538	775	785	C12145	-	-	138148199	-	-	-	ko00600,ko01100
LIPID-P-2392	Cer(t14:1/19:1)	SP	Cer-NP	33	2	520.4724155	537.4757095	[M-H2O+H]+	C33H63NO4	7.6	6.36	5.42	3.84	4.47	5.2	3.64	15.8	11.6	13.7	2.43	7.11	3.43	6.14	5.98	C12145	-	-	138275254	-	-	-	ko00600,ko01100
LIPID-P-2400	Cer(t15:0/22:1)	SP	Cer-NP	37	1	578.5506658	595.5539598	[M-H2O+H]+	C37H73NO4	148	86.4	87.6	71.6	171	124	51.1	198	167	21.9	661	97.5	161	293	272	C12145	-	-	138197632	-	-	-	ko00600,ko01100
LIPID-P-2401	Cer(t15:0/22:2)	SP	Cer-NP	37	2	576.5350158	593.5383098	[M-H2O+H]+	C37H71NO4	97.2	63.2	78.4	68.4	172	105	61.6	93.9	127	18.7	162	78.9	124	127	168	C12145	-	-	138133544	-	-	-	ko00600,ko01100
LIPID-P-2404	Cer(t16:1/25:0)	SP	Cer-NP	41	1	634.6132661	651.6165601	[M-H2O+H]+	C41H81NO4	56.1	3.46	5.51	3.63	15.2	8.9	N/A	26.3	19.9	1.2	7.85	7.93	12.2	12.7	17.7	C12145	-	-	138119701	-	-	-	ko00600,ko01100
LIPID-P-2405	Cer(t16:1/25:1)	SP	Cer-NP	41	2	632.597616	649.60091	[M-H2O+H]+	C41H79NO4	28	6.75	11.3	10.3	39.9	30.5	6.08	33.1	23.1	4.03	32.4	30.2	28.3	21.7	33.3	C12145	-	-	138198230	-	-	-	ko00600,ko01100
LIPID-P-2397	Cer(t14:2/23:0)	SP	Cer-NP	37	2	576.5350158	593.5383098	[M-H2O+H]+	C37H71NO4	28.7	11.5	19.3	19.4	32.6	26.4	14.2	15.7	20.3	4.16	38.7	20.6	18.8	31.1	33.4	C12145	-	-	138254629	-	-	-	ko00600,ko01100
LIPID-P-2412	Cer(t17:1/16:0)	SP	Cer-NP	33	1	522.4880656	539.4913596	[M-H2O+H]+	C33H65NO4	26.6	6.31	8.37	14.8	23.3	22.1	9.59	43.9	28.1	9.02	13.2	12.1	16.1	19	20.3	C12145	-	-	138146109	-	-	-	ko00600,ko01100
LIPID-P-2415	Cer(t17:1/20:0)	SP	Cer-NP	37	1	578.5506658	595.5539598	[M-H2O+H]+	C37H73NO4	198	133	121	112	247	146	66.9	269	261	47.5	893	135	265	312	442	C12145	-	-	138280584	-	-	-	ko00600,ko01100
LIPID-P-2416	Cer(t17:1/20:1)	SP	Cer-NP	37	2	576.5350158	593.5383098	[M-H2O+H]+	C37H71NO4	32	32.2	25.4	19.5	32.8	26.8	11.1	28.3	51.7	9.62	54.1	13	23.4	32.3	36.2	C12145	-	-	138153889	-	-	-	ko00600,ko01100
LIPID-P-2418	Cer(t17:1/22:1)	SP	Cer-NP	39	2	604.5663159	621.5696099	[M-H2O+H]+	C39H75NO4	323	290	315	336	524	275	183	561	531	101	1720	280	644	684	962	C12145	-	-	138173831	-	-	-	ko00600,ko01100
LIPID-P-2419	Cer(t17:1/22:2)	SP	Cer-NP	39	3	602.5506658	619.5539598	[M-H2O+H]+	C39H73NO4	228	203	236	232	509	452	177	195	319	67.9	400	268	331	476	546	C12145	-	-	138297802	-	-	-	ko00600,ko01100
LIPID-P-2406	Cer(t16:1/26:0)	SP	Cer-NP	42	1	648.6289162	665.6322102	[M-H2O+H]+	C42H83NO4	190	23	54.6	66.6	107	101	30.9	159	149	10.5	184	74	103	118	145	C12145	-	-	138172607	-	-	-	ko00600,ko01100
LIPID-P-2420	Cer(t17:1/24:1)	SP	Cer-NP	41	2	632.597616	649.60091	[M-H2O+H]+	C41H79NO4	130	26.8	50.6	43.8	172	114	32.4	154	133	8.04	116	129	116	128	171	C12145	-	-	138238206	-	-	-	ko00600,ko01100
LIPID-P-0123	Cer(d18:1/22:1)	SP	Cer-NS	40	2	620.598125	619.590344	[M+H]+	C40H77NO3	1110	526	1400	303	1320	985	513	712	1900	68.3	974	803	762	1010	1270	C00195	HMDB0011775	-	53481052	-	-	-	ko00600,ko01100,ko04071,ko04217,ko04722,ko04920,ko04931,ko04933,ko05140,ko05415
LIPID-P-0122	Cer(d18:1/20:1)	SP	Cer-NS	38	2	592.566825	591.559044	[M+H]+	C38H73NO3	502	166	477	166	656	501	228	277	770	12.4	362	392	351	492	598	C00195	-	-	138280278	-	-	-	ko00600,ko01100,ko04071,ko04217,ko04722,ko04920,ko04931,ko04933,ko05140,ko05415
LIPID-P-0121	Cer(d18:1/18:1)	SP	Cer-NS	36	2	564.53557	563.527744	[M+H]+	C36H69NO3	1710	217	323	328	790	822	268	765	1020	194	556	451	452	569	623	C00195	HMDB0004948	LMSP02010003	5283563	5966-28-9	-	-	ko00600,ko01100,ko04071,ko04217,ko04722,ko04920,ko04931,ko04933,ko05140,ko05415
LIPID-P-0141	Cer(d18:2/24:0)	SP	Cer-NS	42	2	648.6	647.621644	[M+H]+	C42H81NO3	5830	2160	6430	3700	9910	11500	2690	6900	10200	1100	18900	18600	7820	7670	10700	C00195	-	-	138311445	-	-	-	ko00600,ko01100,ko04071,ko04217,ko04722,ko04920,ko04931,ko04933,ko05140,ko05415
LIPID-P-2114	Cer(d20:2/24:1)	SP	Cer-NS	44	3	656.6340015	673.6372955	[M-H2O+H]+	C44H83NO3	192	34.1	66.1	69.9	203	117	58.5	190	212	35	529	171	180	192	279	C00195	-	-	164498931	-	-	-	ko00600,ko01100,ko04071,ko04217,ko04722,ko04920,ko04931,ko04933,ko05140,ko05415
LIPID-P-2116	Cer(d21:3/16:0)	SP	Cer-NS	37	3	558.5244511	575.5277451	[M-H2O+H]+	C37H69NO3	57.3	25.6	28.7	18.6	37.4	40.5	21.1	59.9	66.1	41.7	46.1	29	33.7	41.6	44.4	C00195	-	-	138137370	-	-	-	ko00600,ko01100,ko04071,ko04217,ko04722,ko04920,ko04931,ko04933,ko05140,ko05415
LIPID-P-2113	Cer(d20:2/24:0)	SP	Cer-NS	44	2	658.6496516	675.6529456	[M-H2O+H]+	C44H85NO3	58.6	13.1	48.8	49.8	112	74	23.2	51.3	75.7	18.9	273	95	78.1	82.8	119	C00195	-	-	138280035	-	-	-	ko00600,ko01100,ko04071,ko04217,ko04722,ko04920,ko04931,ko04933,ko05140,ko05415
LIPID-P-2112	Cer(d20:2/23:0)	SP	Cer-NS	43	2	644.6340015	661.6372955	[M-H2O+H]+	C43H83NO3	38.6	9.8	19.3	26.9	64	38.4	8.66	48.1	52.2	10.3	97	26.3	30.3	35.2	42.1	C00195	-	-	138271787	-	-	-	ko00600,ko01100,ko04071,ko04217,ko04722,ko04920,ko04931,ko04933,ko05140,ko05415
LIPID-P-2111	Cer(d20:2/22:0)	SP	Cer-NS	42	2	630.6183515	647.6216455	[M-H2O+H]+	C42H81NO3	53.4	15.7	29.3	29.6	62.7	45.9	19.6	55.7	80	9.8	152	64.9	51.2	63.3	62.9	C00195	-	-	138247245	-	-	-	ko00600,ko01100,ko04071,ko04217,ko04722,ko04920,ko04931,ko04933,ko05140,ko05415
LIPID-P-0124	Cer(d18:1/24:1)	SP	Cer-NS	42	2	648.62947	647.621644	[M+H]+	C42H81NO3	222000	68900	146000	84400	214000	222000	77700	197000	283000	21600	282000	179000	180000	199000	261000	C00195	HMDB0004953	LMSP02010009	5283568	-	-	-	ko00600,ko01100,ko04071,ko04217,ko04722,ko04920,ko04931,ko04933,ko05140,ko05415
LIPID-P-2117	Cer(d22:1/26:0)	SP	Cer-NS	48	1	716.7279019	733.7311959	[M-H2O+H]+	C48H95NO3	58.3	26.6	33.3	17.9	31.8	36.9	9.53	33.2	28.7	28	27.7	25.8	41.2	26	42.5	C00195	-	-	138259789	-	-	-	ko00600,ko01100,ko04071,ko04217,ko04722,ko04920,ko04931,ko04933,ko05140,ko05415
LIPID-P-0125	Cer(d18:1/26:1)	SP	Cer-NS	44	2	676.66077	675.652944	[M+H]+	C44H85NO3	443	136	345	301	870	789	141	515	701	47.9	2120	723	676	631	931	C00195	-	LMSP02010010	5283569	-	-	-	ko00600,ko01100,ko04071,ko04217,ko04722,ko04920,ko04931,ko04933,ko05140,ko05415
LIPID-P-0140	Cer(d18:2/23:0)	SP	Cer-NS	41	2	634.6	633.605994	[M+H]+	C41H79NO3	3450	1240	2920	2960	6750	7670	1740	4350	5240	423	4380	5650	3610	3760	5470	C00195	-	LMSP02010030	52931124	-	-	-	ko00600,ko01100,ko04071,ko04217,ko04722,ko04920,ko04931,ko04933,ko05140,ko05415
LIPID-P-0127	Cer(d16:1/18:0)	SP	Cer-NS	34	1	538.6	537.512094	[M+H]+	C34H67NO3	43.3	9.46	14.9	23.8	37.5	27.9	13.2	27.6	38.6	11	14.3	13.7	20.2	21.2	22.8	C00195	-	LMSP02010046	10582678	-	-	-	ko00600,ko01100,ko04071,ko04217,ko04722,ko04920,ko04931,ko04933,ko05140,ko05415
LIPID-P-0128	Cer(d16:1/20:0)	SP	Cer-NS	36	1	566.6	565.543394	[M+H]+	C36H71NO3	142	61.7	116	88.1	155	164	92.4	115	168	14.7	65.2	83.7	75.4	126	132	C00195	-	LMSP02010047	70698937	-	-	-	ko00600,ko01100,ko04071,ko04217,ko04722,ko04920,ko04931,ko04933,ko05140,ko05415
LIPID-P-0130	Cer(d16:1/23:0)	SP	Cer-NS	39	1	608.6	607.590344	[M+H]+	C39H77NO3	511	165	351	598	976	707	325	475	568	75.8	236	193	413	498	699	C00195	-	LMSP02010017	11273482	-	-	-	ko00600,ko01100,ko04071,ko04217,ko04722,ko04920,ko04931,ko04933,ko05140,ko05415
LIPID-P-0131	Cer(d16:1/24:0)	SP	Cer-NS	40	1	622.6	621.605994	[M+H]+	C40H79NO3	885	367	767	744	1360	1130	643	887	1120	139	923	490	733	918	1310	C00195	-	LMSP02010050	10627700	-	-	-	ko00600,ko01100,ko04071,ko04217,ko04722,ko04920,ko04931,ko04933,ko05140,ko05415
LIPID-P-0132	Cer(d16:1/24:1)	SP	Cer-NS	40	2	620.6	619.590344	[M+H]+	C40H77NO3	1490	491	1020	1020	2080	1510	796	1470	1780	131	996	687	1050	1300	1790	C00195	-	-	164439072	-	-	-	ko00600,ko01100,ko04071,ko04217,ko04722,ko04920,ko04931,ko04933,ko05140,ko05415
LIPID-P-0133	Cer(d18:2/14:0)	SP	Cer-NS	32	2	508.5	507.465144	[M+H]+	C32H61NO3	79.9	21.5	50.4	49.3	110	78.4	28.1	122	102	15.1	93.3	59.3	62	62.5	72	C00195	-	LMSP02010022	52931116	-	-	-	ko00600,ko01100,ko04071,ko04217,ko04722,ko04920,ko04931,ko04933,ko05140,ko05415
LIPID-P-0139	Cer(d18:2/22:0)	SP	Cer-NS	40	2	620.6	619.590344	[M+H]+	C40H77NO3	3720	1990	5060	1570	4460	5500	2040	3890	6900	351	7420	8290	3720	4600	6450	C00195	-	LMSP02010029	52931123	-	-	-	ko00600,ko01100,ko04071,ko04217,ko04722,ko04920,ko04931,ko04933,ko05140,ko05415
LIPID-P-0137	Cer(d18:2/20:0)	SP	Cer-NS	38	2	592.6	591.559044	[M+H]+	C38H73NO3	686	312	753	392	1150	1200	381	673	1220	53	896	1380	726	977	1290	C00195	-	LMSP02010026	52931120	-	-	-	ko00600,ko01100,ko04071,ko04217,ko04722,ko04920,ko04931,ko04933,ko05140,ko05415
LIPID-P-0136	Cer(d18:2/18:0)	SP	Cer-NS	36	2	564.6	563.527744	[M+H]+	C36H69NO3	412	90.9	181	263	496	448	119	460	515	94.4	294	345	205	305	303	C00195	-	-	15870105	-	-	-	ko00600,ko01100,ko04071,ko04217,ko04722,ko04920,ko04931,ko04933,ko05140,ko05415
LIPID-P-0135	Cer(d18:2/17:0)	SP	Cer-NS	35	2	550.5	549.512094	[M+H]+	C35H67NO3	27.8	4.03	16.9	12.6	33	26.1	10.3	22.9	28.4	6.09	33.7	25.5	14.8	24.9	27.5	C00195	-	-	138253123	-	-	-	ko00600,ko01100,ko04071,ko04217,ko04722,ko04920,ko04931,ko04933,ko05140,ko05415
LIPID-P-0134	Cer(d18:2/16:0)	SP	Cer-NS	34	2	536.5	535.496444	[M+H]+	C34H65NO3	538	140	250	200	375	415	193	729	555	143	366	414	265	326	296	C00195	-	LMSP02010024	52931118	-	-	-	ko00600,ko01100,ko04071,ko04217,ko04722,ko04920,ko04931,ko04933,ko05140,ko05415
LIPID-P-2108	Cer(d20:1/26:0)	SP	Cer-NS	46	1	688.6966018	705.6998958	[M-H2O+H]+	C46H91NO3	90.4	46.2	94.9	76.7	112	86.2	55.1	123	140	69	127	83.3	106	80.5	133	C00195	-	-	138278543	-	-	-	ko00600,ko01100,ko04071,ko04217,ko04722,ko04920,ko04931,ko04933,ko05140,ko05415
LIPID-P-0126	Cer(d16:1/16:0)	SP	Cer-NS	32	1	510.6	509.480794	[M+H]+	C32H63NO3	315	58.7	94.2	147	182	158	98.9	282	176	55.1	85	79.8	112	134	141	C00195	-	-	138235827	-	-	-	ko00600,ko01100,ko04071,ko04217,ko04722,ko04920,ko04931,ko04933,ko05140,ko05415
LIPID-P-2107	Cer(d20:1/25:1)	SP	Cer-NS	45	2	672.6653017	689.6685957	[M-H2O+H]+	C45H87NO3	7.04	6.88	9.23	15.9	12.9	22	5.17	22.9	14.7	13	14.7	26.6	19.4	18.2	24.7	C00195	-	-	-	-	-	-	ko00600,ko01100,ko04071,ko04217,ko04722,ko04920,ko04931,ko04933,ko05140,ko05415
LIPID-P-2095	Cer(d19:1/23:1)	SP	Cer-NS	42	2	630.6183515	647.6216455	[M-H2O+H]+	C42H81NO3	10.2	4.39	10.3	6.43	8.06	17	5.93	12.9	28.7	N/A	31.1	9.99	11.1	8.91	10.2	C00195	-	-	-	-	-	-	ko00600,ko01100,ko04071,ko04217,ko04722,ko04920,ko04931,ko04933,ko05140,ko05415
LIPID-P-2104	Cer(d20:1/24:1)	SP	Cer-NS	44	2	658.6496516	675.6529456	[M-H2O+H]+	C44H85NO3	178	38.4	50.4	72.4	192	176	33.5	129	213	26.7	683	282	210	203	257	C00195	-	-	164325119	-	-	-	ko00600,ko01100,ko04071,ko04217,ko04722,ko04920,ko04931,ko04933,ko05140,ko05415
LIPID-P-0111	Cer(d18:1/18:0)	SP	Cer-NS	36	1	566.55122	565.543394	[M+H]+	C36H71NO3	14900	1740	3160	3900	8620	9330	2790	8760	15400	1860	4890	5140	4990	6270	7640	C00195	HMDB0004950	LMSP02010006	5283565	2304-81-6	-	-	ko00600,ko01100,ko04071,ko04217,ko04722,ko04920,ko04931,ko04933,ko05140,ko05415
LIPID-P-0110	Cer(d18:1/17:0)	SP	Cer-NS	35	1	552.535569	551.527744	[M+H]+	C35H69NO3	949	152	300	240	543	553	223	638	772	98	497	343	350	449	524	C00195	-	LMSP02010020	44584335	-	-	-	ko00600,ko01100,ko04071,ko04217,ko04722,ko04920,ko04931,ko04933,ko05140,ko05415
LIPID-P-0109	Cer(d18:1/16:0)	SP	Cer-NS	34	1	538.51992	537.512094	[M+H]+	C34H67NO3	28300	3970	7170	5410	12400	11400	6050	21300	19000	3890	7620	7580	7930	9920	8610	C00195	HMDB0004949	LMSP02010004	5283564	24696-26-2	-	-	ko00600,ko01100,ko04071,ko04217,ko04722,ko04920,ko04931,ko04933,ko05140,ko05415
LIPID-P-0108	Cer(d18:1/14:0)	SP	Cer-NS	32	1	510.488618	509.480794	[M+H]+	C32H63NO3	789	116	197	215	486	293	197	712	583	156	283	175	261	301	322	C13916	HMDB0011773	LMSP02010001	5282310	-	-	-	-
LIPID-P-2073	Cer(d18:1/22:2)	SP	Cer-NS	40	3	600.5714013	617.5746953	[M-H2O+H]+	C40H75NO3	88.3	30.4	61.3	23	180	113	38.4	53.9	130	4.23	51.7	71.7	62.5	89.3	107	C00195	-	-	164433175	-	-	-	ko00600,ko01100,ko04071,ko04217,ko04722,ko04920,ko04931,ko04933,ko05140,ko05415
LIPID-P-2071	Cer(d18:1/15:0)	SP	Cer-NS	33	1	506.493151	523.496445	[M-H2O+H]+	C33H65NO3	245	36.2	64.2	55.7	110	112	52.9	208	168	39.3	112	49.9	70.2	93.3	94.2	C00195	-	-	132939178	-	-	-	ko00600,ko01100,ko04071,ko04217,ko04722,ko04920,ko04931,ko04933,ko05140,ko05415
LIPID-P-2070	Cer(d18:1/12:0)	SP	Cer-NS	30	1	464.4462008	481.4494948	[M-H2O+H]+	C30H59NO3	73.8	9.71	26.5	20.3	57.3	40.6	13.8	53.3	70.8	6.04	44.5	26.9	32.1	42.6	50.2	C00195	-	-	11454491	-	-	-	ko00600,ko01100,ko04071,ko04217,ko04722,ko04920,ko04931,ko04933,ko05140,ko05415
LIPID-P-2069	Cer(d17:2/24:1)	SP	Cer-NS	41	3	614.5870513	631.5903453	[M-H2O+H]+	C41H77NO3	26.1	14.6	26.4	18.3	43.6	45.8	14.6	37.8	48.6	2.55	45.4	57.9	34	36.8	49.2	C00195	-	-	164354502	-	-	-	ko00600,ko01100,ko04071,ko04217,ko04722,ko04920,ko04931,ko04933,ko05140,ko05415
LIPID-P-2067	Cer(d17:1/26:2)	SP	Cer-NS	43	3	642.6183515	659.6216455	[M-H2O+H]+	C43H81NO3	7.79	4.03	5.87	7.12	18	21.2	0.981	27.4	20.8	N/A	31.7	18	12.7	17.3	16.3	C00195	-	-	164195599	-	-	-	ko00600,ko01100,ko04071,ko04217,ko04722,ko04920,ko04931,ko04933,ko05140,ko05415
LIPID-P-2064	Cer(d17:1/25:0)	SP	Cer-NS	42	1	632.6340015	649.6372955	[M-H2O+H]+	C42H83NO3	29.3	5.37	13.2	21	41.6	56.8	7.13	34.9	36.5	5.94	93	77.9	46.5	35.2	28.6	C00195	-	-	138218170	-	-	-	ko00600,ko01100,ko04071,ko04217,ko04722,ko04920,ko04931,ko04933,ko05140,ko05415
LIPID-P-2062	Cer(d17:1/24:1)	SP	Cer-NS	41	2	616.6027014	633.6059954	[M-H2O+H]+	C41H79NO3	8980	3470	7200	4320	12200	11200	4010	10600	12900	607	8650	6540	6930	8520	11800	C00195	-	-	164285331	-	-	-	ko00600,ko01100,ko04071,ko04217,ko04722,ko04920,ko04931,ko04933,ko05140,ko05415
LIPID-P-2061	Cer(d17:1/24:0)	SP	Cer-NS	41	1	618.6183515	635.6216455	[M-H2O+H]+	C41H81NO3	143	47.7	82.1	81.9	272	193	58.9	220	189	15.3	168	120	147	157	201	C00195	-	-	138231924	-	-	-	ko00600,ko01100,ko04071,ko04217,ko04722,ko04920,ko04931,ko04933,ko05140,ko05415
LIPID-P-2060	Cer(d17:1/23:1)	SP	Cer-NS	40	2	602.5870513	619.5903453	[M-H2O+H]+	C40H77NO3	320	159	436	139	426	478	180	372	614	31.7	504	706	311	375	535	C00195	-	-	-	-	-	-	ko00600,ko01100,ko04071,ko04217,ko04722,ko04920,ko04931,ko04933,ko05140,ko05415
LIPID-P-0112	Cer(d18:1/19:0)	SP	Cer-NS	37	1	580.6	579.559044	[M+H]+	C37H73NO3	391	76.3	200	178	612	547	100	296	512	35.5	167	258	222	294	400	C00195	-	LMSP02010032	52931126	-	-	-	ko00600,ko01100,ko04071,ko04217,ko04722,ko04920,ko04931,ko04933,ko05140,ko05415
LIPID-P-2059	Cer(d17:1/23:0)	SP	Cer-NS	40	1	604.6027014	621.6059954	[M-H2O+H]+	C40H79NO3	58.7	16.2	39.5	32.1	82.9	62.6	20.8	77.7	72.1	6.06	40.6	50.2	51	56.6	66.6	C00195	-	-	102157659	-	-	-	ko00600,ko01100,ko04071,ko04217,ko04722,ko04920,ko04931,ko04933,ko05140,ko05415
LIPID-P-2056	Cer(d17:1/21:0)	SP	Cer-NS	38	1	576.5714013	593.5746953	[M-H2O+H]+	C38H75NO3	45.4	23.7	54.8	29.7	81.3	84	26.4	55.8	77.6	4.36	19	33.6	36.5	50.1	66.3	C00195	-	-	138146535	-	-	-	ko00600,ko01100,ko04071,ko04217,ko04722,ko04920,ko04931,ko04933,ko05140,ko05415
LIPID-P-2055	Cer(d17:1/20:0)	SP	Cer-NS	37	1	562.5557512	579.5590452	[M-H2O+H]+	C37H73NO3	300	145	371	190	487	469	171	277	541	29	164	301	201	272	355	C00195	-	-	138140730	-	-	-	ko00600,ko01100,ko04071,ko04217,ko04722,ko04920,ko04931,ko04933,ko05140,ko05415
LIPID-P-2054	Cer(d17:1/18:1)	SP	Cer-NS	35	2	532.508801	549.512095	[M-H2O+H]+	C35H67NO3	147	20.1	27.5	42.5	99.7	80.4	31	64.7	85.6	14.6	59.2	41.6	42.7	59.2	75.9	C00195	-	-	164388566	-	-	-	ko00600,ko01100,ko04071,ko04217,ko04722,ko04920,ko04931,ko04933,ko05140,ko05415
LIPID-P-2053	Cer(d17:1/18:0)	SP	Cer-NS	35	1	534.5244511	551.5277451	[M-H2O+H]+	C35H69NO3	485	82.4	138	241	430	433	102	398	533	58.4	193	222	203	285	337	C00195	-	-	45934169	-	-	-	ko00600,ko01100,ko04071,ko04217,ko04722,ko04920,ko04931,ko04933,ko05140,ko05415
LIPID-P-2052	Cer(d17:1/17:0)	SP	Cer-NS	34	1	520.508801	537.512095	[M-H2O+H]+	C34H67NO3	18.7	2.63	N/A	3.42	3.04	4.94	3.83	11.7	16.2	2.25	6.24	3.77	5.05	7.93	6.21	C00195	-	-	138274039	-	-	-	ko00600,ko01100,ko04071,ko04217,ko04722,ko04920,ko04931,ko04933,ko05140,ko05415
LIPID-P-2051	Cer(d17:1/16:0)	SP	Cer-NS	33	1	506.493151	523.496445	[M-H2O+H]+	C33H65NO3	2580	351	647	690	1250	1150	584	2390	1640	431	876	725	694	986	901	C00195	-	-	138198887	-	-	-	ko00600,ko01100,ko04071,ko04217,ko04722,ko04920,ko04931,ko04933,ko05140,ko05415
LIPID-P-2049	Cer(d17:1/14:0)	SP	Cer-NS	31	1	478.4618508	495.4651448	[M-H2O+H]+	C31H61NO3	82.6	14.8	24.8	25.4	47.5	35.4	19.6	93.2	77.5	15	36.9	18.6	37.7	36.6	51.5	C00195	-	-	138298719	-	-	-	ko00600,ko01100,ko04071,ko04217,ko04722,ko04920,ko04931,ko04933,ko05140,ko05415
LIPID-P-2048	Cer(d16:1/26:1)	SP	Cer-NS	42	2	630.6183515	647.6216455	[M-H2O+H]+	C42H81NO3	54.9	17.3	30.4	18.9	53.3	51.5	11.6	57.7	59.8	8.72	75.2	41.1	37.1	46.1	60.4	C00195	-	-	164313393	-	-	-	ko00600,ko01100,ko04071,ko04217,ko04722,ko04920,ko04931,ko04933,ko05140,ko05415
LIPID-P-2047	Cer(d16:1/26:0)	SP	Cer-NS	42	1	632.6340015	649.6372955	[M-H2O+H]+	C42H83NO3	76.9	52.5	49.2	56	118	51	40.8	90.3	121	46	98.8	66.9	58	79	79.9	C00195	-	-	138254529	-	-	-	ko00600,ko01100,ko04071,ko04217,ko04722,ko04920,ko04931,ko04933,ko05140,ko05415
LIPID-P-2046	Cer(d16:1/25:1)	SP	Cer-NS	41	2	616.6027014	633.6059954	[M-H2O+H]+	C41H79NO3	18.7	6.16	9.92	11.8	28.5	19	3.2	13.5	23.8	1.45	18.1	3.93	13.1	12.7	18.1	C00195	-	-	-	-	-	-	ko00600,ko01100,ko04071,ko04217,ko04722,ko04920,ko04931,ko04933,ko05140,ko05415
LIPID-P-2037	Cer(d14:1/15:1)	SP	Cer-NS	29	2	448.4149006	465.4181946	[M-H2O+H]+	C29H55NO3	10.7	9.53	3.65	4.24	6.51	2.22	13.1	3.52	2.96	7.85	40.1	3.54	31.2	28.3	47.5	C00195	-	-	138214506	-	-	-	ko00600,ko01100,ko04071,ko04217,ko04722,ko04920,ko04931,ko04933,ko05140,ko05415
LIPID-P-2058	Cer(d17:1/22:1)	SP	Cer-NS	39	2	588.5714013	605.5746953	[M-H2O+H]+	C39H75NO3	96.8	34.6	111	27.4	89	95.8	51.9	71.5	138	4.61	53.6	42.8	66.3	74.9	112	C00195	-	-	164440228	-	-	-	ko00600,ko01100,ko04071,ko04217,ko04722,ko04920,ko04931,ko04933,ko05140,ko05415
LIPID-P-2106	Cer(d20:1/25:0)	SP	Cer-NS	45	1	674.6809517	691.6842457	[M-H2O+H]+	C45H89NO3	34.9	20.2	27.3	22.3	51.2	50	22.9	75.8	77	21.9	48	28.7	45.4	43.9	63.4	C00195	-	-	138280526	-	-	-	ko00600,ko01100,ko04071,ko04217,ko04722,ko04920,ko04931,ko04933,ko05140,ko05415
LIPID-P-0114	Cer(d18:1/21:0)	SP	Cer-NS	39	1	608.598169	607.590344	[M+H]+	C39H77NO3	1340	580	1340	679	2050	2140	564	1110	2030	116	767	932	1020	1320	1810	C00195	-	-	57713716	-	-	-	ko00600,ko01100,ko04071,ko04217,ko04722,ko04920,ko04931,ko04933,ko05140,ko05415
LIPID-P-0116	Cer(d18:1/23:0)	SP	Cer-NS	41	1	636.629469	635.621644	[M+H]+	C41H81NO3	55600	21600	51200	35900	87400	82700	25700	52400	85300	6210	48800	32500	43600	51500	72100	C00195	HMDB0000950	LMSP02010021	52931115	67605-84-9	-	-	ko00600,ko01100,ko04071,ko04217,ko04722,ko04920,ko04931,ko04933,ko05140,ko05415
LIPID-P-2101	Cer(d20:1/22:1)	SP	Cer-NS	42	2	630.6183515	647.6216455	[M-H2O+H]+	C42H81NO3	11.3	4.41	7.9	4.48	14.7	12.2	5.05	6.22	15.5	2.14	17.3	17.8	10.9	12.2	14.6	C00195	-	-	164359573	-	-	-	ko00600,ko01100,ko04071,ko04217,ko04722,ko04920,ko04931,ko04933,ko05140,ko05415
LIPID-P-2100	Cer(d19:2/24:1)	SP	Cer-NS	43	3	642.6183515	659.6216455	[M-H2O+H]+	C43H81NO3	24.1	9.06	16.7	11	26.1	18.7	5.93	37.4	27.8	4.52	100	43.2	27	23.9	34.9	C00195	-	-	164244752	-	-	-	ko00600,ko01100,ko04071,ko04217,ko04722,ko04920,ko04931,ko04933,ko05140,ko05415
LIPID-P-2099	Cer(d19:2/24:0)	SP	Cer-NS	43	2	644.6340015	661.6372955	[M-H2O+H]+	C43H83NO3	16	N/A	8.02	5.72	15.4	9.04	3.81	8.74	17.3	2.63	116	54.3	18.2	25.6	32.9	C00195	-	-	138295712	-	-	-	ko00600,ko01100,ko04071,ko04217,ko04722,ko04920,ko04931,ko04933,ko05140,ko05415
LIPID-P-2097	Cer(d19:1/25:0)	SP	Cer-NS	44	1	660.6653017	677.6685957	[M-H2O+H]+	C44H87NO3	30.5	18.7	63.4	41.7	87	81.4	26.7	70.3	90.7	16.5	111	40.3	73.3	63.3	61.8	C00195	-	-	138125755	-	-	-	ko00600,ko01100,ko04071,ko04217,ko04722,ko04920,ko04931,ko04933,ko05140,ko05415
LIPID-P-2096	Cer(d19:1/24:1)	SP	Cer-NS	43	2	644.6340015	661.6372955	[M-H2O+H]+	C43H83NO3	1070	244	662	489	1460	1230	342	829	1410	124	2570	968	978	1010	1390	C00195	-	-	164242696	-	-	-	ko00600,ko01100,ko04071,ko04217,ko04722,ko04920,ko04931,ko04933,ko05140,ko05415
LIPID-P-0142	Cer(d18:2/24:1)	SP	Cer-NS	42	3	646.6	645.605994	[M+H]+	C42H79NO3	7320	2900	5940	3370	11100	11300	3090	9980	12000	782	15200	18300	8300	10200	14500	C00195	-	-	164413685	-	-	-	ko00600,ko01100,ko04071,ko04217,ko04722,ko04920,ko04931,ko04933,ko05140,ko05415
LIPID-P-2094	Cer(d19:1/23:0)	SP	Cer-NS	42	1	632.6340015	649.6372955	[M-H2O+H]+	C42H83NO3	223	71.1	194	199	460	372	118	189	359	43.6	315	136	174	222	263	C00195	-	-	138222905	-	-	-	ko00600,ko01100,ko04071,ko04217,ko04722,ko04920,ko04931,ko04933,ko05140,ko05415
LIPID-P-2093	Cer(d19:1/22:1)	SP	Cer-NS	41	2	616.6027014	633.6059954	[M-H2O+H]+	C41H79NO3	21.9	9.81	24.9	4.62	14.2	22.1	7.24	23.4	35.6	2.47	18.1	9.81	18	15.5	22	C00195	-	-	164397435	-	-	-	ko00600,ko01100,ko04071,ko04217,ko04722,ko04920,ko04931,ko04933,ko05140,ko05415
LIPID-P-2092	Cer(d19:1/22:0)	SP	Cer-NS	41	1	618.6183515	635.6216455	[M-H2O+H]+	C41H81NO3	329	143	383	179	438	425	156	245	575	49.5	649	308	285	314	414	C00195	-	-	138141186	-	-	-	ko00600,ko01100,ko04071,ko04217,ko04722,ko04920,ko04931,ko04933,ko05140,ko05415
LIPID-P-2091	Cer(d19:1/18:0)	SP	Cer-NS	37	1	562.5557512	579.5590452	[M-H2O+H]+	C37H73NO3	33.5	9.1	16.8	16	34.8	34.1	10.5	25.3	46	3.49	30	21.1	17.6	25.7	29	C00195	-	-	138266303	-	-	-	ko00600,ko01100,ko04071,ko04217,ko04722,ko04920,ko04931,ko04933,ko05140,ko05415
LIPID-P-2089	Cer(d19:1/16:0)	SP	Cer-NS	35	1	534.5244511	551.5277451	[M-H2O+H]+	C35H69NO3	46.5	15.3	21.1	11.9	33.6	19.1	14.9	27.5	39.2	6.03	29.5	13.2	20.5	29.8	24.6	C00195	-	-	138157469	-	-	-	ko00600,ko01100,ko04071,ko04217,ko04722,ko04920,ko04931,ko04933,ko05140,ko05415
LIPID-P-2087	Cer(d18:2/26:1)	SP	Cer-NS	44	3	656.6340015	673.6372955	[M-H2O+H]+	C44H83NO3	55.2	18.7	31.6	22.7	91.1	97.8	19.6	71.3	56.9	9.16	407	183	99.4	96.8	151	C00195	-	-	164271374	-	-	-	ko00600,ko01100,ko04071,ko04217,ko04722,ko04920,ko04931,ko04933,ko05140,ko05415
LIPID-P-2086	Cer(d18:2/25:1)	SP	Cer-NS	43	3	642.6183515	659.6216455	[M-H2O+H]+	C43H81NO3	102	28	60.2	61.8	154	192	27.5	109	122	10.1	248	182	109	136	165	C00195	-	-	-	-	-	-	ko00600,ko01100,ko04071,ko04217,ko04722,ko04920,ko04931,ko04933,ko05140,ko05415
LIPID-P-0115	Cer(d18:1/22:0)	SP	Cer-NS	40	1	622.61382	621.605994	[M+H]+	C40H79NO3	73500	37200	90200	29300	67600	78100	43800	58000	119000	5740	91500	66400	65100	72200	107000	C00195	HMDB0004952	LMSP02010008	5283567	27888-44-4	-	-	ko00600,ko01100,ko04071,ko04217,ko04722,ko04920,ko04931,ko04933,ko05140,ko05415
LIPID-P-2085	Cer(d18:2/25:0)	SP	Cer-NS	43	2	644.6340015	661.6372955	[M-H2O+H]+	C43H83NO3	342	235	581	297	598	671	192	721	919	72.3	605	583	443	495	627	C00195	-	-	138260618	-	-	-	ko00600,ko01100,ko04071,ko04217,ko04722,ko04920,ko04931,ko04933,ko05140,ko05415
LIPID-P-2083	Cer(d18:2/22:1)	SP	Cer-NS	40	3	600.5714013	617.5746953	[M-H2O+H]+	C40H75NO3	387	637	946	150	455	382	335	682	1220	24.5	460	488	516	659	814	C00195	-	-	164277320	-	-	-	ko00600,ko01100,ko04071,ko04217,ko04722,ko04920,ko04931,ko04933,ko05140,ko05415
LIPID-P-2082	Cer(d18:2/19:0)	SP	Cer-NS	37	2	560.5401012	577.5433952	[M-H2O+H]+	C37H71NO3	36.1	8.45	24.5	16.5	65	62.4	12.7	40.1	68.1	3.58	22.8	49.4	30	34	34.7	C00195	-	-	21775879	-	-	-	ko00600,ko01100,ko04071,ko04217,ko04722,ko04920,ko04931,ko04933,ko05140,ko05415
LIPID-P-2081	Cer(d18:2/16:1)	SP	Cer-NS	34	3	516.4775009	533.4807949	[M-H2O+H]+	C34H63NO3	30.6	7.16	6.24	14.6	14.9	28.9	12.6	10.5	13.2	4.33	4.73	17.8	15.1	12.7	21.9	C00195	-	-	164447817	-	-	-	ko00600,ko01100,ko04071,ko04217,ko04722,ko04920,ko04931,ko04933,ko05140,ko05415
LIPID-P-2080	Cer(d18:2/15:0)	SP	Cer-NS	33	2	504.4775009	521.4807949	[M-H2O+H]+	C33H63NO3	13.1	2.95	6.87	1.98	7.35	7.91	3.18	11.9	24.5	1.33	10.9	8.6	7.81	8.66	12	C00195	-	-	138180324	-	-	-	ko00600,ko01100,ko04071,ko04217,ko04722,ko04920,ko04931,ko04933,ko05140,ko05415
LIPID-P-2078	Cer(d18:1/28:0)	SP	Cer-NS	46	1	688.6966018	705.6998958	[M-H2O+H]+	C46H91NO3	52.3	27.6	41.7	23.7	59.8	53.4	28.9	70	49.5	29.8	53.4	30.6	42.3	42.9	64.8	C00195	-	-	10122880	-	-	-	ko00600,ko01100,ko04071,ko04217,ko04722,ko04920,ko04931,ko04933,ko05140,ko05415
LIPID-P-2077	Cer(d18:1/26:2)	SP	Cer-NS	44	3	656.6340015	673.6372955	[M-H2O+H]+	C44H83NO3	49.1	12.2	22.1	21.7	75.6	67.7	19.5	36.7	62.1	11	284	68.1	58.6	69.1	92.6	C00195	-	-	164307826	-	-	-	ko00600,ko01100,ko04071,ko04217,ko04722,ko04920,ko04931,ko04933,ko05140,ko05415
LIPID-P-2076	Cer(d18:1/25:1)	SP	Cer-NS	43	2	644.6340015	661.6372955	[M-H2O+H]+	C43H83NO3	1980	485	1280	1100	2760	2820	526	1750	2710	201	2980	1320	1560	1690	2400	C00195	-	-	-	-	-	-	ko00600,ko01100,ko04071,ko04217,ko04722,ko04920,ko04931,ko04933,ko05140,ko05415
LIPID-P-2075	Cer(d18:1/24:2)	SP	Cer-NS	42	3	628.6027014	645.6059954	[M-H2O+H]+	C42H79NO3	3920	799	2630	1360	4650	4490	1210	2960	5910	294	6290	3420	2550	3010	4430	C00195	-	-	164259035	-	-	-	ko00600,ko01100,ko04071,ko04217,ko04722,ko04920,ko04931,ko04933,ko05140,ko05415
LIPID-P-2074	Cer(d18:1/23:1)	SP	Cer-NS	41	2	616.6027014	633.6059954	[M-H2O+H]+	C41H79NO3	3510	1760	3680	926	3190	2770	1280	3280	5990	230	3520	2020	2480	2970	4200	C00195	-	-	-	-	-	-	ko00600,ko01100,ko04071,ko04217,ko04722,ko04920,ko04931,ko04933,ko05140,ko05415
LIPID-P-0120	Cer(d18:1/16:1)	SP	Cer-NS	34	2	536.504225	535.496444	[M+H]+	C34H65NO3	223	59.3	52.3	48.4	46.1	63.5	47.7	106	106	80.7	137	61.5	54.5	85.4	63.8	C00195	HMDB0035480	-	131751776	141980-53-2	-	-	ko00600,ko01100,ko04071,ko04217,ko04722,ko04920,ko04931,ko04933,ko05140,ko05415
LIPID-P-0119	Cer(d18:1/26:0)	SP	Cer-NS	44	1	678.676419	677.668594	[M+H]+	C44H87NO3	631	272	441	747	1140	1200	255	751	1040	206	1320	673	808	833	1030	C00195	HMDB0004955	LMSP02010011	5283570	-	-	-	ko00600,ko01100,ko04071,ko04217,ko04722,ko04920,ko04931,ko04933,ko05140,ko05415
LIPID-P-0118	Cer(d18:1/25:0)	SP	Cer-NS	43	1	664.660769	663.652944	[M+H]+	C43H85NO3	6390	5100	10900	5180	11300	11100	3380	9890	16100	764	6420	3970	7140	7590	9940	C00195	HMDB0004957	LMSP02010013	9547202	67492-18-6	-	-	ko00600,ko01100,ko04071,ko04217,ko04722,ko04920,ko04931,ko04933,ko05140,ko05415
LIPID-P-0117	Cer(d18:1/24:0)	SP	Cer-NS	42	1	650.64512	649.637294	[M+H]+	C42H83NO3	80600	32000	80200	48900	125000	111000	40800	73600	135000	8300	167000	83600	68700	79200	116000	C00195	HMDB0004956	LMSP02010012	5283571	34435-05-7	-	-	ko00600,ko01100,ko04071,ko04217,ko04722,ko04920,ko04931,ko04933,ko05140,ko05415
LIPID-P-2084	Cer(d18:2/24:2)	SP	Cer-NS	42	4	626.5870513	643.5903453	[M-H2O+H]+	C42H77NO3	185	59.2	145	77.3	320	262	80.7	196	281	23.9	380	412	211	240	359	C00195	-	-	164455028	-	-	-	ko00600,ko01100,ko04071,ko04217,ko04722,ko04920,ko04931,ko04933,ko05140,ko05415
LIPID-P-0143	Cer(d18:2/26:0)	SP	Cer-NS	44	2	676.6	675.652944	[M+H]+	C44H85NO3	61	20.5	35.9	37.6	84.4	89.9	14.9	69.2	96.6	15.5	188	134	60.8	71.2	105	C00195	-	-	138314265	-	-	-	ko00600,ko01100,ko04071,ko04217,ko04722,ko04920,ko04931,ko04933,ko05140,ko05415
LIPID-P-2065	Cer(d17:1/25:1)	SP	Cer-NS	42	2	630.6183515	647.6216455	[M-H2O+H]+	C42H81NO3	499	177	589	392	969	1160	288	576	843	82.9	2070	1950	684	839	1210	C00195	-	-	-	-	-	-	ko00600,ko01100,ko04071,ko04217,ko04722,ko04920,ko04931,ko04933,ko05140,ko05415
LIPID-N-0606	CerP(d18:1/24:0)	SP	CerP	42	1	728.595802	729.603626	[M-H]-	C42H84NO6P	28.9	12.2	19.25	31.4	47.9	39.55	15.75	N/A	26	N/A	176.5	37.1	25.7	22.45	26.7	C02960	HMDB0010704	LMSP02050008	5283587	-	-	-	ko00600,ko01100
LIPID-P-0052	Cholesterol	ST	Cholesterol	27	1	369.4	386.354865	[M-H2O+H]+	C27H46O	21600	17800	26350	26300	45900	35800	20300	15400	28400	5250	55000	38500	33100	33900	40100	C00187	HMDB0000067	LMST01010001	5997	57-88-5	-	-	ko00100,ko00120,ko00140,ko01100,ko04913,ko04925,ko04927,ko04934,ko04975,ko04976,ko04977,ko04979,ko05200,ko05217,ko05417
LIPID-P-0161	CoenzymeQ10	PR	CoQ	10	0	863.69147	862.68391	[M+H]+	C59H90O4	283.2	73.2	158.4	200.8	332.4	464	138.4	91.2	139.2	26.8	848	536	302	312	252.4	C11378	HMDB0001072	LMPR02010001	5281915	303-98-0	-	-	ko04216
LIPID-P-0160	CoenzymeQ9	PR	CoQ	9	0	795.62878	794.62131	[M+H]+	C54H82O4	3252	2096	2392	4520	5800	7640	3388	1292	2524	424	12800	6760	5480	5040	4320	C01967	HMDB0006707	LMPR02010004	5280473	303-97-9	-	-	-
LIPID-P-0159	CoenzymeQ8	PR	CoQ	8	0	727.56592	780.60566	[M+H]+	C53H80O4	159.6	244	183.2	568	692	816	384	75.6	144	23.56	932	416	484	428	360.4	C17569	HMDB0006709	LMPR02010005	5283546	606-06-4	-	-	-
LIPID-P-0215	DG(17:1_18:1)	GL	DG	35	2	624.55499	606.522325	[M+NH4]+	C38H70O5	195	104.2	133	284	142.6	138.4	130.6	151.6	109.8	92.2	121.6	216	104.6	96	133.8	C00641	-	LMGL02010007	5283472	-	-	-	ko00561,ko00562,ko00564,ko01100,ko04070,ko04730
LIPID-P-0196	DG(16:0_18:1)	GL	DG	34	1	612.566066	594.522325	[M+NH4]+	C37H70O5	5440	3100	4180	5080	3260	5640	3820	7400	6640	3820	5280	5060	4440	3340	4240	C13861	HMDB0007102	LMGL02010006	5282283	29541-66-0	-	-	-
LIPID-P-0214	DG(16:0_18:2)	GL	DG	34	2	610.550416	592.506675	[M+NH4]+	C37H68O5	1016	386	604	690	696	1270	914	834	980	338	3060	1236	356	636	544	C00641	HMDB0007103	LMGL02010027	9543695	51621-26-2	-	-	ko00561,ko00562,ko00564,ko01100,ko04070,ko04730
LIPID-P-0201	DG(18:0_18:1)	GL	DG	36	1	640.597366	622.553625	[M+NH4]+	C39H74O5	452	242	123.8	324	154	228	154.2	308	446	206	406	420	222	244	156.6	C00641	HMDB0007160	LMGL02010043	6443547	-	-	-	ko00561,ko00562,ko00564,ko01100,ko04070,ko04730
LIPID-P-0217	DG(18:0_18:2)	GL	DG	36	2	638.581716	620.537975	[M+NH4]+	C39H72O5	129.8	57.6	124.2	212	390	564	137.2	126.4	161.6	63	476	440	244	240	204	C00641	HMDB0007161	LMGL02010050	6441562	-	-	-	ko00561,ko00562,ko00564,ko01100,ko04070,ko04730
LIPID-P-0218	DG(18:1_18:1)	GL	DG	36	2	638.581716	620.537975	[M+NH4]+	C39H72O5	9370	2720	4550	6550	7210	5330	6370	6470	5130	8220	3630	9060	3680	5850	4350	C00641	HMDB0007218	LMGL02010049	9543716	-	-	-	ko00561,ko00562,ko00564,ko01100,ko04070,ko04730
LIPID-P-0228	DG(16:0_20:3)	GL	DG	36	3	636.566066	618.522325	[M+NH4]+	C39H70O5	95.6	73	230	232	346	306	118.6	142.2	248	46.4	634	392	169	224	136	C00641	HMDB0007111	LMGL02010062	9543728	257891-89-7	-	-	ko00561,ko00562,ko00564,ko01100,ko04070,ko04730
LIPID-P-0233	DG(18:1_20:2)	GL	DG	38	3	664.597366	646.553625	[M+NH4]+	C41H74O5	204	34.4	43.8	51	46.4	120.8	46	214	161.4	34.6	64.4	382	83.4	91	130	C00641	HMDB0007225	LMGL02010100	9543766	-	-	-	ko00561,ko00562,ko00564,ko01100,ko04070,ko04730
LIPID-P-0194	DG(15:0_18:1)	GL	DG	33	1	598.53351	580.506675	[M+NH4]+	C36H68O5	125.6	21.4	78	73	123.6	114.4	88	70.2	91.2	38.8	85.6	108.6	62	72.8	74.8	C00641	HMDB0007072	LMGL02010432	53478004	-	-	-	ko00561,ko00562,ko00564,ko01100,ko04070,ko04730
LIPID-P-0234	DG(18:0_20:3)	GL	DG	38	3	664.58539	646.553625	[M+NH4]+	C41H74O5	126	47.6	54.2	117.4	123.4	234	61.6	52.6	140	N/A	448	376	122.8	111.8	73.6	C00641	HMDB0007168	LMGL02010101	53478052	-	-	-	ko00561,ko00562,ko00564,ko01100,ko04070,ko04730
LIPID-P-0239	DG(16:0_20:4)	GL	DG	36	4	634.550416	616.506675	[M+NH4]+	C39H68O5	1344	678	1358	1654	1520	3780	666	1224	1386	252	7560	1592	1562	1806	1424	C00165	HMDB0007112	LMGL02010070	9543736	-	-	-	ko01521,ko04010,ko04012,ko04014,ko04015,ko04020,ko04024,ko04062,ko04064,ko04066,ko04071,ko04072,ko04261,ko04270,ko04370,ko04371,ko04540,ko04611,ko04613,ko04625,ko04650,ko04658,ko04659,ko04660,ko04662,ko04664,ko04666,ko04713,ko04714,ko04720,ko04722,ko04723,ko04724,ko04725,ko04726,ko04728,ko04730,ko04750,ko04911,ko04912,ko04915,ko04916,ko04918,ko04919,ko04920,ko04921,ko04923,ko04925,ko04926,ko04928…
LIPID-P-0242	DG(18:1_20:3)	GL	DG	38	4	662.581716	644.537975	[M+NH4]+	C41H72O5	89.2	31	112	45.2	38.6	156.2	25.2	N/A	108.6	N/A	118.6	197.8	86	112.8	89.4	C00641	HMDB0007227	LMGL02010110	9543776	-	-	-	ko00561,ko00562,ko00564,ko01100,ko04070,ko04730
LIPID-P-0243	DG(18:0_20:4)	GL	DG	38	4	662.581716	644.537975	[M+NH4]+	C41H72O5	2500	404	1238	1166	2360	2340	1016	1286	1826	500	7800	4080	1798	2580	2400	C00165	HMDB0007170	LMGL02010111	6438587	-	-	-	ko01521,ko04010,ko04012,ko04014,ko04015,ko04020,ko04024,ko04062,ko04064,ko04066,ko04071,ko04072,ko04261,ko04270,ko04370,ko04371,ko04540,ko04611,ko04613,ko04625,ko04650,ko04658,ko04659,ko04660,ko04662,ko04664,ko04666,ko04713,ko04714,ko04720,ko04722,ko04723,ko04724,ko04725,ko04726,ko04728,ko04730,ko04750,ko04911,ko04912,ko04915,ko04916,ko04918,ko04919,ko04920,ko04921,ko04923,ko04925,ko04926,ko04928…
LIPID-P-0246	DG(18:1_22:3)	GL	DG	40	4	690.59583	672.569275	[M+NH4]+	C43H76O5	141.6	19.1	38.4	39.6	41.8	31	43	140.2	70.8	56.4	93	128.6	71.8	65.2	47.6	C00641	-	LMGL02010181	9543846	-	-	-	ko00561,ko00562,ko00564,ko01100,ko04070,ko04730
LIPID-P-0252	DG(18:1_20:4)	GL	DG	38	5	660.566066	642.522325	[M+NH4]+	C41H70O5	1034	462	778	854	878	1800	816	862	1094	148.2	4000	1968	1112	1516	846	C00641	HMDB0007228	LMGL02010121	9543786	-	-	-	ko00561,ko00562,ko00564,ko01100,ko04070,ko04730
LIPID-P-0254	DG(18:0_20:5)	GL	DG	38	5	660.55707	642.522325	[M+NH4]+	C41H70O5	34.4	13.34	18.68	32	99.2	108.8	14.16	N/A	18.76	N/A	92.4	79.6	35.4	46.6	42.6	C00641	HMDB0007172	LMGL02010122	9543787	-	-	-	ko00561,ko00562,ko00564,ko01100,ko04070,ko04730
LIPID-P-0269	DG(18:1_22:6)	GL	DG	40	7	684.560826	666.522325	[M+NH4]+	C43H70O5	1346	434	494	642	1244	1142	770	1062	1090	272	2140	2840	462	778	630	C00641	HMDB0007208	-	53478083	-	-	-	ko00561,ko00562,ko00564,ko01100,ko04070,ko04730
LIPID-P-0266	DG(18:0_22:6)	GL	DG	40	6	686.56982	668.537975	[M+NH4]+	C43H72O5	564	124.4	350	498	496	840	136.2	272	630	71.8	990	690	404	548	318	C00641	HMDB0007179	LMGL02010216	9543881	-	-	-	ko00561,ko00562,ko00564,ko01100,ko04070,ko04730
LIPID-P-0229	DG(18:1_18:2)	GL	DG	36	3	636.566066	618.522325	[M+NH4]+	C39H70O5	1408	652	784	1614	1156	2100	1030	1212	1940	816	2000	1826	1092	1448	1348	C00641	HMDB0007219	LMGL02010056	9543722	91125-76-7	-	-	ko00561,ko00562,ko00564,ko01100,ko04070,ko04730
LIPID-P-0193	DG(16:0_17:1)	GL	DG	33	1	598.53351	580.506675	[M+NH4]+	C36H68O5	68.2	31.8	67.6	61.6	25.6	41.6	40.8	79.8	46.4	17.9	55.8	35	51.8	74.4	43.8	C00641	-	LMGL02010014	9543682	-	-	-	ko00561,ko00562,ko00564,ko01100,ko04070,ko04730
LIPID-P-0191	DG(14:0_18:1)	GL	DG	32	1	584.534766	566.491025	[M+NH4]+	C35H66O5	644	220	374	446	244	246	222	422	440	362	446	284	206	240	258	C00641	HMDB0007014	LMGL02010384	53477952	-	-	-	ko00561,ko00562,ko00564,ko01100,ko04070,ko04730
LIPID-P-1422	DG(12:0_16:1)	GL	DG	28	1	528.462799	510.428425	[M+NH4]+	C31H58O5	101.6	86	49.6	98.6	31.2	45.2	110.2	134.4	21.6	270	94.4	63.6	104.2	143.8	123.2	C00641	-	LMGL02010322	56936297	-	-	-	ko00561,ko00562,ko00564,ko01100,ko04070,ko04730
LIPID-P-1432	DG(8:0_18:2)	GL	DG	26	2	498.415849	480.381475	[M+NH4]+	C29H52O5	78.2	18.84	53	76.2	64	100	29.2	106.4	119.6	27.4	50.8	63.4	62.6	65.4	73.2	C00641	-	-	-	-	-	-	ko00561,ko00562,ko00564,ko01100,ko04070,ko04730
LIPID-P-0213	DG(16:1_18:1)	GL	DG	34	2	610.550416	592.506675	[M+NH4]+	C37H68O5	2840	1270	1110	1248	1732	948	1120	2580	2160	1772	2500	1788	1482	1286	1476	C00641	HMDB0007131	LMGL02010026	9543694	-	-	-	ko00561,ko00562,ko00564,ko01100,ko04070,ko04730
LIPID-P-0211	DG(16:1_16:1)	GL	DG	32	2	582.519116	564.475375	[M+NH4]+	C35H64O5	57.7	36.2	48.1	20.1	23	N/A	N/A	25.3	25.9	57.3	22.7	12.8	35.1	33.5	25.2	C00641	HMDB0007128	LMGL02010011	9543679	-	-	-	ko00561,ko00562,ko00564,ko01100,ko04070,ko04730
LIPID-P-0169	DG(16:0_16:0)	GL	DG	32	0	586.550416	568.506675	[M+NH4]+	C35H68O5	864	704	1030	1190	1040	1070	1020	1230	995	1280	1430	1400	742	956	910	C00165	HMDB0007098	LMGL02010001	644078	-	-	-	ko01521,ko04010,ko04012,ko04014,ko04015,ko04020,ko04024,ko04062,ko04064,ko04066,ko04071,ko04072,ko04261,ko04270,ko04370,ko04371,ko04540,ko04611,ko04613,ko04625,ko04650,ko04658,ko04659,ko04660,ko04662,ko04664,ko04666,ko04713,ko04714,ko04720,ko04722,ko04723,ko04724,ko04725,ko04726,ko04728,ko04730,ko04750,ko04911,ko04912,ko04915,ko04916,ko04918,ko04919,ko04920,ko04921,ko04923,ko04925,ko04926,ko04928…
LIPID-P-0174	DG(16:0_18:0)	GL	DG	34	0	614.581716	596.537975	[M+NH4]+	C37H72O5	386	392	600	750	620	928	850	526	506	1016	692	736	318	464	480	C00165	HMDB0007100	LMGL02010020	9543688	-	-	-	ko01521,ko04010,ko04012,ko04014,ko04015,ko04020,ko04024,ko04062,ko04064,ko04066,ko04071,ko04072,ko04261,ko04270,ko04370,ko04371,ko04540,ko04611,ko04613,ko04625,ko04650,ko04658,ko04659,ko04660,ko04662,ko04664,ko04666,ko04713,ko04714,ko04720,ko04722,ko04723,ko04724,ko04725,ko04726,ko04728,ko04730,ko04750,ko04911,ko04912,ko04915,ko04916,ko04918,ko04919,ko04920,ko04921,ko04923,ko04925,ko04926,ko04928…
LIPID-P-1458	DG(16:2_18:2)	GL	DG	34	4	606.509749	588.475375	[M+NH4]+	C37H64O5	181.2	118	167	446	440	332	85.8	111.6	152	486	478	163	177.8	222	196	C00641	-	-	-	-	-	-	ko00561,ko00562,ko00564,ko01100,ko04070,ko04730
LIPID-P-0181	DG(19:0_18:0)	GL	DG	37	0	656.61432	638.584925	[M+NH4]+	C40H78O5	1056	1000	1756	1516	678	1874	1336	1144	1698	2400	1618	1158	1084	870	926	C00641	HMDB0094065	LMGL02010065	9543731	-	-	-	ko00561,ko00562,ko00564,ko01100,ko04070,ko04730
LIPID-P-0178	DG(18:0_18:0)	GL	DG	36	0	642.613016	624.569275	[M+NH4]+	C39H76O5	102	138	79	191	72	367	73.5	132	107	467	333	152	72.3	93.2	126	C00641	HMDB0007158	LMGL02010002	102615	-	-	-	ko00561,ko00562,ko00564,ko01100,ko04070,ko04730
LIPID-P-0182	DG(21:0_16:0)	GL	DG	37	0	656.61432	638.584925	[M+NH4]+	C40H78O5	770	1292	2500	1990	674	2400	1688	1326	2440	2700	2400	778	800	1110	1452	C00641	HMDB0094301	LMGL02010087	9543753	-	-	-	ko00561,ko00562,ko00564,ko01100,ko04070,ko04730
LIPID-P-1672	DG(O-18:0_18:2)	GL	DG-O	36	2	624.593084	606.55871	[M+NH4]+	C39H74O4	422	484	1212	1294	2040	1338	866	686	1130	111.4	294	1956	1152	1210	1082	C03201	-	-	-	-	-	-	ko00565,ko01100
LIPID-P-1639	DG(O-19:0_16:0)	GL	DG-O	35	0	614.608734	596.57436	[M+NH4]+	C38H76O4	220	716	410	934	612	1050	386	756	860	698	548	826	464	726	674	C03201	-	-	-	-	-	-	ko00565,ko01100
LIPID-P-1704	DG(O-16:1_22:6)	GL	DG-O	38	7	642.546134	624.51176	[M+NH4]+	C41H68O4	948	230	270	332	458	546	199	888	774	187.2	988	776	440	624	404	C03201	-	-	-	-	-	-	ko00565,ko01100
LIPID-P-1678	DG(O-19:2_20:0)	GL	DG-O	39	2	666.640034	648.60566	[M+NH4]+	C42H80O4	124	33.4	135.4	202	336	440	170.4	84.4	133.4	105	140.4	165	149.6	166	112.2	C03201	-	-	-	-	-	-	ko00565,ko01100
LIPID-P-1801	DGDG(16:0_16:3)	GL	DGDG	32	3	904.599749	886.565375	[M+NH4]+	C47H82O15	13.06	41.8	43.4	28.4	40.6	60.2	64.6	86.8	87.4	N/A	52	18.96	78	75.2	109.4	C06037	-	-	-	-	-	-	ko00561,ko01100
LIPID-N-0063	TXB2	FA	Eicosanoid	-	-	369.227675	370.2355388	[M-H]-	C20H34O6	N/A	N/A	38.56	35.08	55.6	58.4	23.84	9.76	15.76	N/A	13	30.8	27.44	37.76	25.2	C05963	HMDB0003252	LMFA03030002	5283137	54397-85-2	5283137	-	ko00590,ko01100,ko04726,ko04976
LIPID-N-0057	PGF2α	FA	Eicosanoid	-	-	353.232775	354.2406242	[M-H]-	C20H34O5	9.36	44.8	74	41.2	101.2	94	52.4	20.04	36.64	N/A	100	43.2	66.4	82	64.4	C00639	HMDB0001139	LMFA03010002	5283078	551-11-1	10469728	-	ko00590,ko01100,ko04072,ko04080,ko04726,ko04913,ko04921,ko04976
LIPID-N-0056	PGE2	FA	Eicosanoid	-	-	351.217151	352.2249741	[M-H]-	C20H32O5	9.44	12.36	38.52	44.8	47.2	54.4	26.92	26.84	14.6	N/A	76.4	63.6	59.2	74.8	51.2	C00584	HMDB0001220	LMFA03010003	5280360	363-24-6	5280914	-	ko00590,ko01100,ko04024,ko04080,ko04625,ko04726,ko04750,ko04921,ko04923,ko04924,ko04976,ko05140,ko05143,ko05146,ko05163,ko05165,ko05200,ko05323
LIPID-N-0041	11(S)-HETE	FA	Eicosanoid	-	-	319.22732	320.2351449	[M-H]-	C20H32O3	37.88	32.52	76.4	111.6	146.4	171.6	64.8	33.76	55.6	N/A	74.4	132.8	90	96.4	87.2	-	-	LMFA03060085	5283152	54886-50-9	-	-	-
LIPID-N-0034	(±)12-HETE	FA	Eicosanoid	-	-	319.22732	320.2351449	[M-H]-	C20H32O3	295.6	137.6	178.8	298.4	152.4	1064	624	173.6	211.6	30.96	188.4	13800	1504	1816	1452	C14777	HMDB0006111	LMFA03060088	5353272	59985-28-3	-	-	ko00590,ko04913,ko04925
LIPID-N-0028	(±)12-HEPE	FA	Eicosanoid	-	-	317.21167	318.2194948	[M-H]-	C20H30O3	23.92	N/A	23.56	29.4	31.32	129.6	155.6	N/A	N/A	N/A	N/A	1444	183.6	151.2	138	-	HMDB0010202	LMFA03070031	10041593	81187-21-5	5283159	-	-
LIPID-N-0023	9,10-EpOME	FA	Eicosanoid	-	-	295.227275	296.2351449	[M-H]-	C18H32O3	19.28	25.72	83.6	128.4	150.4	188	60	27.24	69.6	12.32	50.8	102	70.8	82.8	86.4	C14825	HMDB0004701	-	5283018	65167-83-1	5356421	-	ko00591,ko01100
LIPID-N-0022	12,13-EpOME	FA	Eicosanoid	-	-	295.227275	296.2351449	[M-H]-	C18H32O3	54	62.8	79.2	101.6	132	198.8	108.4	63.2	68	21.12	54.4	161.2	80.4	97.2	84.8	C14826	HMDB0004702	-	5356421	-	5356421	-	ko00591,ko01100
LIPID-N-0062	TxB3	FA	Eicosanoid	-	-	367.212075	368.2198888	[M-H]-	C20H32O6	148.4	103.6	131.6	142.4	140	205.2	153.2	186	219.2	119.6	166	120	108.4	138	122.4	-	HMDB0005099	LMFA03030016	6438711	71953-80-5	10469728	-	-
LIPID-N-0714	FFA(32:1)	FA	FFA	32	1	477.467155	478.47498	[M-H]-	C32H62O2	19.54	29.2	12.36	22	19.76	17.34	20.4	17.84	20.8	28.4	18.26	17.16	16.24	14.62	16.7	C00162	-	LMFA01030098	5282778	-	-	-	ko00062,ko00071,ko00561,ko04152,ko04714,ko04911,ko04920,ko04923,ko04930,ko04931,ko04932,ko04975,ko04977,ko04979,ko05231,ko05415
LIPID-N-0085	FFA(19:1)	FA	FFA	19	1	295.263705	296.27153	[M-H]-	C19H36O2	54.2	34.4	41.8	64.2	63.6	62.4	47.8	43.6	62.8	27.6	82	72.2	55.2	52.2	57.2	C00162	-	LMFA01030857	52921828	-	-	-	ko00062,ko00071,ko00561,ko04152,ko04714,ko04911,ko04920,ko04923,ko04930,ko04931,ko04932,ko04975,ko04977,ko04979,ko05231,ko05415
LIPID-N-0103	FFA(24:5)	FA	FFA	24	5	357.279355	358.28718	[M-H]-	C24H38O2	448.5	23	62	27.95	35.1	48.15	28.4	238.5	243.5	87.5	79.5	80.5	105	103.5	109.5	C00162	HMDB0006322	LMFA01030820	14505435	-	-	-	ko00062,ko00071,ko00561,ko04152,ko04714,ko04911,ko04920,ko04923,ko04930,ko04931,ko04932,ko04975,ko04977,ko04979,ko05231,ko05415
LIPID-N-0102	FFA(22:5)	FA	FFA	22	5	329.248055	330.25588	[M-H]-	C22H34O2	84.4	34.6	41.8	29	91.6	116	63.6	25.8	37.8	8.84	922	132.4	155.4	134	124	C00162	HMDB0004708	LMFA01030182	5497182	24880-45-3	-	-	ko00062,ko00071,ko00561,ko04152,ko04714,ko04911,ko04920,ko04923,ko04930,ko04931,ko04932,ko04975,ko04977,ko04979,ko05231,ko05415
LIPID-N-0099	FFA(22:4)	FA	FFA	22	4	331.263705	332.27153	[M-H]-	C22H36O2	306	79.4	111.8	84.6	179.6	228	134.4	111.4	151.6	29.4	1394	302	312	278	258	C16527	HMDB0034295	LMFA01030177	5282938	496-86-6	-	-	ko01040,ko04216
LIPID-N-0098	FFA(20:4)	FA	FFA	20	4	303.232405	304.24023	[M-H]-	C20H32O2	730	455	820	615	1060	1565	860	348	870	63.5	2050	1520	965	1030	1030	C00219	HMDB0001043	LMFA01030173	5497181	28874-58-0	-	-	ko00590,ko00591,ko01040,ko01100,ko04216,ko04217,ko04270,ko04611,ko04664,ko04666,ko04723,ko04726,ko04730,ko04750,ko04912,ko04913,ko04921,ko04923,ko04925,ko05140,ko05146
LIPID-N-0096	FFA(22:3)	FA	FFA	22	3	333.279355	334.28718	[M-H]-	C22H38O2	171.8	48.6	58.4	73.6	63	80.2	46.2	149	137.4	58.4	304	159	127.6	107.6	108	C00162	HMDB0002823	LMFA01030161	5312557	28845-86-5	-	-	ko00062,ko00071,ko00561,ko04152,ko04714,ko04911,ko04920,ko04923,ko04930,ko04931,ko04932,ko04975,ko04977,ko04979,ko05231,ko05415
LIPID-N-0095	FFA(20:3)	FA	FFA	20	3	305.248055	306.25588	[M-H]-	C20H34O2	228	162	195.4	296	252	310	136.6	193	254	61.6	548	390	292	278	262	C03242	HMDB0002925	LMFA01030157	5280581	1783-84-2	-	-	ko00591,ko01040,ko01100
LIPID-N-0084	FFA(18:1)	FA	FFA	18	1	281.248055	282.25588	[M-H]-	C18H34O2	4740	2840	3500	5220	5840	5120	3620	3400	4920	2300	7420	8520	4840	5040	4840	C00712	HMDB0000207	LMFA01030061	445639	112-80-1	-	-	ko00061,ko01040
LIPID-N-0094	FFA(18:3)	FA	FFA	18	3	277.216755	278.22458	[M-H]-	C18H30O2	3.76	2.38	1.942	2.6	2.7	5.36	3	1.978	2.44	1.506	8.86	4.46	3.58	4.06	4.36	C08364	HMDB0030963	LMFA01030140	5280934	463-40-1	-	-	-
LIPID-N-0091	FFA(20:2)	FA	FFA	20	2	307.263705	308.27153	[M-H]-	C20H36O2	216	136	139.4	170.2	169.6	154	140.4	189.2	208	92.8	294	214	190.4	188.4	169.4	C16525	HMDB0005060	LMFA01030130	6439848	5598-38-9	-	-	ko01040
LIPID-N-0090	FFA(18:2)	FA	FFA	18	2	279.232405	280.24023	[M-H]-	C18H32O2	410	212	308	360	598	708	380	224	352	109.8	1192	912	498	532	520	C01595	HMDB0000673	LMFA01030110	5280450	60-33-3	-	-	ko00591,ko01040,ko01100
LIPID-N-0089	FFA(16:2)	FA	FFA	16	2	251.201105	252.20893	[M-H]-	C16H28O2	20.2	6.12	4.74	7.78	5.9	7.48	4.42	12.5	14.26	2.82	11.64	9.78	9.68	9.28	8.7	C00162	-	LMFA01030275	5312427	5070-03-1	-	-	ko00062,ko00071,ko00561,ko04152,ko04714,ko04911,ko04920,ko04923,ko04930,ko04931,ko04932,ko04975,ko04977,ko04979,ko05231,ko05415
LIPID-N-0088	FFA(24:1)	FA	FFA	24	1	365.341955	366.34978	[M-H]-	C24H46O2	82.8	37.8	39.6	28.8	25	36.6	29.4	23.6	32.4	15.54	101	68.8	35	48.2	40.8	C08323	HMDB0006059	LMFA01030092	5280877	80434-82-8	-	-	ko01040
LIPID-N-0087	FFA(22:1)	FA	FFA	22	1	337.310655	338.31848	[M-H]-	C22H42O2	75	75.6	55.4	44.6	65.8	65.2	46.4	45.8	52.2	16.24	106.2	96.6	62.4	50	49.8	C08316	HMDB0002068	LMFA01030088	5281116	112-86-7	-	-	ko01040
LIPID-N-0086	FFA(20:1)	FA	FFA	20	1	309.279355	310.28718	[M-H]-	C20H38O2	166.6	165.2	173.6	190.2	153.2	140.2	135.4	158.6	189.8	106.8	216	268	190	167	145.4	C16526	HMDB0002231	LMFA01030082	5282768	5561-99-9	-	-	ko01040
LIPID-N-0092	FFA(22:2)	FA	FFA	22	2	335.295005	336.30283	[M-H]-	C22H40O2	14.5	9.88	5.66	8.84	13.98	5	8.92	10.78	11	7.1	39.2	21.6	15.08	9.88	12.62	C14813	HMDB0004693	LMFA01030131	11954058	219535-29-2	-	-	ko00590,ko01100
LIPID-N-0101	FFA(20:5)	FA	FFA	20	5	301.216755	302.22458	[M-H]-	C20H30O2	131	184	241.5	232.5	390.5	463.5	394.5	70	192	27.35	423	314.5	255.5	274	275.5	C06428	HMDB0001999	LMFA01030180	5282846	10417-94-4	-	-	ko01040
LIPID-N-0105	FFA(24:6)	FA	FFA	24	6	355.263705	356.27153	[M-H]-	C24H36O2	88.5	13.75	15.4	16	17.65	28.8	18.05	33.55	39	23.7	23	49.05	35.55	34	30.4	C00162	HMDB0002007	LMFA01030822	11792612	68378-49-4	-	-	ko00062,ko00071,ko00561,ko04152,ko04714,ko04911,ko04920,ko04923,ko04930,ko04931,ko04932,ko04975,ko04977,ko04979,ko05231,ko05415
LIPID-N-0698	FFA(26:0)	FA	FFA	26	0	395.388905	396.39673	[M-H]-	C26H52O2	13.92	17.74	19.92	15.46	12.66	11.5	10.74	18.92	7.96	20	14.2	15.82	11.7	8.5	15.26	C00162	HMDB0002356	LMFA01010026	10469	506-46-7	-	-	ko00062,ko00071,ko00561,ko04152,ko04714,ko04911,ko04920,ko04923,ko04930,ko04931,ko04932,ko04975,ko04977,ko04979,ko05231,ko05415
LIPID-N-0080	FFA(14:1)	FA	FFA	14	1	225.185455	226.19328	[M-H]-	C14H26O2	20.8	7.3	4.42	11.98	10.06	8.4	13	5	12.9	2.98	4.66	14.44	14.88	16.46	11.46	C08322	HMDB0002000	LMFA01030047	5281119	554-64-9	-	-	-
LIPID-N-0079	FFA(24:0)	FA	FFA	24	0	367.357605	368.36543	[M-H]-	C24H48O2	60.4	44.2	44.8	50	25.6	40	43.4	48	40.6	57.2	82.4	58.4	50.2	38.8	53.4	C08320	HMDB0002003	LMFA01010024	11197	557-59-5	-	-	ko01040
LIPID-N-0076	FFA(20:0)	FA	FFA	20	0	311.295005	312.30283	[M-H]-	C20H40O2	13.4	40.4	23.4	15.52	20.2	19.72	20.4	38.6	19.04	39.4	51	38.8	29.8	30.6	25.8	C06425	HMDB0002212	LMFA01010020	10467	506-30-9	-	-	ko01040
LIPID-N-0720	FFA(21:2)	FA	FFA	21	2	321.279355	322.28718	[M-H]-	C21H38O2	6.58	6.52	6.9	5.82	7.2	5.5	8.14	8.68	7.22	9.62	7.16	7.94	6.9	7.44	6.1	C00162	-	LMFA01030862	52921833	-	-	-	ko00062,ko00071,ko00561,ko04152,ko04714,ko04911,ko04920,ko04923,ko04930,ko04931,ko04932,ko04975,ko04977,ko04979,ko05231,ko05415
LIPID-N-0715	FFA(34:1)	FA	FFA	34	1	505.498455	506.50628	[M-H]-	C34H66O2	10.24	11.84	10.2	5.24	4.92	8.52	8.24	14.28	8.96	10.88	9.94	N/A	8.22	7.38	7.12	C00162	-	LMFA01031111	92033288	-	-	-	ko00062,ko00071,ko00561,ko04152,ko04714,ko04911,ko04920,ko04923,ko04930,ko04931,ko04932,ko04975,ko04977,ko04979,ko05231,ko05415
LIPID-N-0708	FFA(36:0)	FA	FFA	36	0	535.545405	536.55323	[M-H]-	C36H72O2	304	199.6	145.8	154.4	132.2	126.8	197.8	238	193.8	113.8	168	228	189	202	189.8	C00162	-	LMFA01010036	5282596	4299-38-1	-	-	ko00062,ko00071,ko00561,ko04152,ko04714,ko04911,ko04920,ko04923,ko04930,ko04931,ko04932,ko04975,ko04977,ko04979,ko05231,ko05415
LIPID-N-0700	FFA(28:0)	FA	FFA	28	0	423.420205	424.42803	[M-H]-	C28H56O2	64.2	65.8	56.2	111.6	88.4	64.6	73.6	88.4	101.6	95.4	78.8	88.2	64.2	83.2	69.8	C00162	HMDB0002348	LMFA01010028	10470	506-48-9	-	-	ko00062,ko00071,ko00561,ko04152,ko04714,ko04911,ko04920,ko04923,ko04930,ko04931,ko04932,ko04975,ko04977,ko04979,ko05231,ko05415
LIPID-N-0082	FFA(16:1)	FA	FFA	16	1	253.216755	254.22458	[M-H]-	C16H30O2	100.8	65.4	76.2	101.8	115.8	94	80.8	58.6	83.6	24.8	193.2	173.8	97.2	106	103.4	C08362	HMDB0003229	LMFA01030054	445638	373-49-9	-	-	ko00061,ko01100
LIPID-N-0083	FFA(17:1)	FA	FFA	17	1	267.232405	268.24023	[M-H]-	C17H32O2	122.8	71.8	100.4	136.6	162.4	147.4	115.4	75	111.6	43.4	266	206	125.2	134.6	149.8	C16536	HMDB0030997	LMFA01030059	192796	-	-	-	-
LIPID-N-0695	FFA(19:0)	FA	FFA	19	0	297.279355	298.28718	[M-H]-	C19H38O2	18.54	15.44	19.38	10.02	16.1	11.3	23.2	15.22	14.18	N/A	23.8	18.08	13.26	12	12.94	C00162	HMDB0000772	LMFA01010019	12591	646-30-0	-	-	ko00062,ko00071,ko00561,ko04152,ko04714,ko04911,ko04920,ko04923,ko04930,ko04931,ko04932,ko04975,ko04977,ko04979,ko05231,ko05415
LIPID-N-0104	FFA(22:6)	FA	FFA	22	6	327.232405	328.24023	[M-H]-	C22H32O2	1665	380.5	530	487.5	1000	1345	780	600	990	139.5	1755	1175	915	855	830	C06429	HMDB0002183	LMFA01030185	445580	6217-54-5	-	-	ko01040
LIPID-N-0075	FFA(18:0)	FA	FFA	18	0	283.263705	284.27153	[M-H]-	C18H36O2	1198	1084	916	1052	1254	1468	1018	738	888	1162	2460	1746	1780	1766	1688	C01530	HMDB0000827	LMFA01010018	5281	57-11-4	-	-	ko00061,ko01040,ko01100
LIPID-N-0074	FFA(17:0)	FA	FFA	17	0	269.248055	270.25588	[M-H]-	C17H34O2	50.2	28	37.8	48.4	69.6	90.2	37.4	29.4	48.6	42.8	143.6	84.6	66.4	75.8	73.4	C00162	HMDB0002259	LMFA01010017	10465	506-12-7	-	-	ko00062,ko00071,ko00561,ko04152,ko04714,ko04911,ko04920,ko04923,ko04930,ko04931,ko04932,ko04975,ko04977,ko04979,ko05231,ko05415
LIPID-N-0073	FFA(16:0)	FA	FFA	16	0	255.232405	256.24023	[M-H]-	C16H32O2	1708	1178	1154	1370	1628	1808	1318	1214	1380	1074	3580	2380	2060	2320	2200	C00249	HMDB0000220	LMFA01010001	985	57-10-3	-	-	ko00061,ko00062,ko00071,ko01040,ko01100,ko01212
LIPID-N-0072	FFA(15:0)	FA	FFA	15	0	241.216755	242.22458	[M-H]-	C15H30O2	93.4	66.4	81.4	77.8	95.4	108.4	78.2	72.4	85	61.8	174.6	109.2	99.8	97.6	96.2	C16537	HMDB0000826	LMFA01010015	13849	1002-84-2	-	-	-
LIPID-N-0071	FFA(14:0)	FA	FFA	14	0	227.201105	228.20893	[M-H]-	C14H28O2	96.8	38.8	61.4	88.4	58.8	89	65.6	59.8	67.8	33.6	125.2	74.4	81.4	78.8	72	C06424	HMDB0000806	LMFA01010014	11005	544-63-8	-	-	ko00061,ko01100
LIPID-N-0067	FFA(10:0)	FA	FFA	10	0	171.138505	172.14633	[M-H]-	C10H20O2	25.6	36	20.8	22.4	19.7	26.4	31.2	23	21.4	44	22.8	22.4	23	25	24.2	C01571	HMDB0000511	LMFA01010010	2969	334-48-5	-	-	ko00061,ko01100
LIPID-N-0697	FFA(25:0)	FA	FFA	25	0	381.373255	382.38108	[M-H]-	C25H50O2	8.82	10.94	10.76	9.74	10.94	11.76	15.14	16.98	9.96	13.44	13.7	13.72	13.36	11.12	11.48	C00162	-	LMFA01010025	10468	506-38-7	-	-	ko00062,ko00071,ko00561,ko04152,ko04714,ko04911,ko04920,ko04923,ko04930,ko04931,ko04932,ko04975,ko04977,ko04979,ko05231,ko05415
LIPID-P-0317	Hex2Cer(d18:1/16:0)	SP	Hex2Cer	34	1	862.6	861.617744	[M+H]+	C46H87NO13	2212	404	592	916	836	816	1080	1256	696	206.4	1044	1160	1428	928	1296	C01290	HMDB0004868	LMSP0501AB03	53477895	-	-	-	ko00600,ko01100
LIPID-P-2125	HexCer(t14:1/17:0(2OH))	SP	HexCer-AP	31	1	510.4516705	689.5077975	[M-H2O+H]+	C37H71NO10	85.6	41.2	53.2	67.2	70	80	84	45.6	46.4	24.08	109.2	49.6	73.6	56	86.8	-	-	-	-	-	-	-	-
LIPID-P-2181	HexCer(t30:2/28:0(2OH))	SP	HexCer-AP	58	2	886.8585722	1065.914699	[M-H2O+H]+	C64H123NO10	84.4	26.84	30.12	50	37.56	68.8	44.4	60.8	44.4	19.4	73.2	62.4	69.2	46	80	-	-	-	-	-	-	-	-
LIPID-P-2178	HexCer(t27:2/31:0(2OH))	SP	HexCer-AP	58	2	886.8585722	1065.914699	[M-H2O+H]+	C64H123NO10	229.6	55.6	90.4	96	68.4	79.2	100	103.6	94.4	29.32	106.4	101.2	111.6	95.2	113.6	-	-	-	-	-	-	-	-
LIPID-P-2128	HexCer(t14:1/24:0(2OH))	SP	HexCer-AP	38	1	608.5612209	787.6173479	[M-H2O+H]+	C44H85NO10	168	40.8	35.6	62.8	44	78.4	93.2	39.08	78.4	41.2	215.6	83.6	70.4	51.2	89.2	-	-	-	-	-	-	-	-
LIPID-P-2133	HexCer(t15:0/16:2(2OH))	SP	HexCer-AP	31	2	508.4360204	687.4921474	[M-H2O+H]+	C37H69NO10	5.96	2.884	N/A	6.4	9.16	13.36	8.4	N/A	3.216	N/A	18.16	7.24	6.92	5.56	9.2	-	-	-	-	-	-	-	-
LIPID-P-2138	HexCer(t16:2/32:1(2OH))	SP	HexCer-AP	48	3	744.6864215	923.7425485	[M-H2O+H]+	C54H101NO10	131.2	48.8	64.4	70.4	86	78	94	78.4	60.8	19	107.6	78.8	88	66	63.2	-	-	-	-	-	-	-	-
LIPID-P-2141	HexCer(t17:1/16:0(2OH))	SP	HexCer-AP	33	1	538.4829706	717.5390976	[M-H2O+H]+	C39H75NO10	66	104	14.12	9.44	N/A	10.88	145.2	12.28	6.04	50.8	352.8	14.52	269.2	162.8	300.4	-	-	-	-	-	-	-	-
LIPID-P-2148	HexCer(t17:2/32:2(2OH))	SP	HexCer-AP	49	4	756.6864215	935.7425485	[M-H2O+H]+	C55H101NO10	800	146.8	172	255.2	271.6	234	374.8	323.6	242.4	64	311.2	242	325.2	213.6	280.4	-	-	-	-	-	-	-	-
LIPID-P-2150	HexCer(t17:2/40:1(2OH))	SP	HexCer-AP	57	3	870.827272	1049.883399	[M-H2O+H]+	C63H119NO10	2816	1668	2192	2228	2420	2120	5640	1016	1620	268.8	4080	1872	2744	1752	2824	-	-	-	-	-	-	-	-
LIPID-P-2151	HexCer(t17:2/42:1(2OH))	SP	HexCer-AP	59	3	898.8585722	1077.914699	[M-H2O+H]+	C65H123NO10	488	278.4	386.8	640	632	580	972	169.6	314.8	82.4	1172	404	580	420	600	-	-	-	-	-	-	-	-
LIPID-P-2156	HexCer(t18:0/20:1(2OH))	SP	HexCer-AP	38	1	608.5612209	787.6173479	[M-H2O+H]+	C44H85NO10	104.8	32.96	40.8	50.4	77.2	95.6	72.4	50.8	48.4	63.6	305.2	75.2	104.8	62.4	103.6	-	-	-	-	-	-	-	-
LIPID-P-2158	HexCer(t18:0/24:0(2OH))	SP	HexCer-AP	42	0	666.6394713	845.6955983	[M-H2O+H]+	C48H95NO10	202.8	64.8	80	188.8	344	171.6	171.2	136.8	121.6	21.6	310.4	168.8	283.2	178	309.6	-	-	-	-	-	-	-	-
LIPID-P-2159	HexCer(t18:1/20:0(2OH))	SP	HexCer-AP	38	1	608.5612209	787.6173479	[M-H2O+H]+	C44H85NO10	203.2	60	57.2	94.8	128	112	104.8	63.2	82	62.8	397.6	104.8	107.6	101.2	152.8	-	-	-	-	-	-	-	-
LIPID-P-2161	HexCer(t18:2/20:0(2OH))	SP	HexCer-AP	38	2	606.5455709	785.6016979	[M-H2O+H]+	C44H83NO10	165.2	41.6	62.4	102.4	116	96.4	105.2	66.4	77.6	53.6	306	73.2	110.4	66.8	117.6	-	-	-	-	-	-	-	-
LIPID-P-2167	HexCer(t20:2/38:2(2OH))	SP	HexCer-AP	58	4	882.827272	1061.883399	[M-H2O+H]+	C64H119NO10	289.2	205.6	235.6	342.4	251.2	382.8	500	174.8	176	99.6	620	181.6	345.2	214.8	331.6	-	-	-	-	-	-	-	-
LIPID-P-2168	HexCer(t22:1/16:1(2OH))	SP	HexCer-AP	38	2	606.5455709	785.6016979	[M-H2O+H]+	C44H83NO10	580	196.4	166	322	288.8	334.8	310.8	165.2	222	200.8	992	259.6	297.6	244	424	-	-	-	-	-	-	-	-
LIPID-P-2170	HexCer(t22:2/14:1(2OH))	SP	HexCer-AP	36	3	576.4986207	755.5547477	[M-H2O+H]+	C42H77NO10	101.2	54	58.4	193.6	784	560	54.4	95.2	46.8	14.92	808	326.4	416	305.2	556	-	-	-	-	-	-	-	-
LIPID-P-2171	HexCer(t22:2/15:1(2OH))	SP	HexCer-AP	37	3	590.5142707	769.5703977	[M-H2O+H]+	C43H79NO10	162	96.4	122.4	408	1360	816	157.6	107.2	80.8	30.36	1148	512	748	464	796	-	-	-	-	-	-	-	-
LIPID-P-2172	HexCer(t22:2/16:2(2OH))	SP	HexCer-AP	38	4	602.5142707	781.5703977	[M-H2O+H]+	C44H79NO10	44.4	10.68	6.08	59.2	158	123.6	29.16	10.24	13.28	6.88	96.8	55.2	98.4	54.4	91.2	-	-	-	-	-	-	-	-
LIPID-P-2173	HexCer(t23:2/15:1(2OH))	SP	HexCer-AP	38	3	604.5299208	783.5860478	[M-H2O+H]+	C44H81NO10	77.2	49.6	34.16	127.6	496	293.6	68	62	30.32	3.228	416	175.6	252.4	139.2	214.8	-	-	-	-	-	-	-	-
LIPID-P-2123	HexCer(t14:0/24:1(2OH))	SP	HexCer-AP	38	1	608.5612209	787.6173479	[M-H2O+H]+	C44H85NO10	39.4	16.04	13.64	25.24	20.68	27.32	19	12.56	8.6	14.96	99.6	27.32	36.08	32.88	44.4	-	-	-	-	-	-	-	-
LIPID-P-2149	HexCer(t17:2/34:2(2OH))	SP	HexCer-AP	51	4	784.7177216	963.7738486	[M-H2O+H]+	C57H105NO10	3084	355.6	644	828	996	688	1296	1184	1164	180.8	620	928	1060	736	1316	-	-	-	-	-	-	-	-
LIPID-P-2237	HexCer(d18:2/22:1)	SP	HexCer-NS	40	3	600.5719357	779.6275187	[M-H2O+H]+	C46H85NO8	79.2	146	201.2	43.2	114.4	77.2	162.8	70	160.8	4.36	246.8	110.8	161.2	105.6	187.6	C01190	-	-	-	-	-	-	ko00600,ko01100
LIPID-P-0285	HexCer(d16:1/18:0)	SP	HexCer-NS	34	1	700.6	699.564919	[M+H]+	C40H77NO8	107.6	36.72	62	120.4	106.8	90	93.6	54.4	64.4	18.36	80.4	50.8	46	45.6	66.4	C01190	-	LMSP0501AA49	70699230	-	-	-	ko00600,ko01100
LIPID-P-0292	HexCer(d18:1/16:0)	SP	HexCer-NS	34	1	700.572744	699.564919	[M+H]+	C40H77NO8	2440	892	1228	1872	2344	2292	2124	2304	1516	700	3292	1080	1868	1508	1924	C01190	HMDB0004971	LMSP0501AA03	14035030	-	-	-	ko00600,ko01100
LIPID-P-0293	HexCer(d18:1/17:0)	SP	HexCer-NS	35	1	714.588394	713.580569	[M+H]+	C41H79NO8	134	32.16	78	147.2	154.4	154	146	103.2	86	18.96	196.8	75.6	124.8	102.8	124.8	C01190	-	-	-	-	-	-	ko00600,ko01100
LIPID-P-0294	HexCer(d18:1/18:0)	SP	HexCer-NS	36	1	728.604025	727.596219	[M+H]+	C42H81NO8	816	180	273.2	968	944	860	396.4	652	780	218	600	516	656	524	760	C01190	HMDB0004972	LMSP0501AA05	11958364	-	-	-	ko00600,ko01100
LIPID-P-0295	HexCer(d18:1/19:0)	SP	HexCer-NS	37	1	742.619694	741.611869	[M+H]+	C43H83NO8	175.2	54	102.8	99.6	213.2	136.8	137.6	90.4	137.6	10.36	66.4	80	104	126.4	174.4	C01190	-	-	-	-	-	-	ko00600,ko01100
LIPID-P-0298	HexCer(d18:1/23:0)	SP	HexCer-NS	41	1	798.682294	797.674469	[M+H]+	C47H91NO8	6480	1480	3112	6600	10520	7960	4520	4040	3776	656	8120	4400	7200	4760	8080	C01190	-	LMSP0501AA32	52931253	-	-	-	ko00600,ko01100
LIPID-P-2199	HexCer(d16:1/26:1)	SP	HexCer-NS	42	2	630.6188859	809.6744689	[M-H2O+H]+	C48H91NO8	205.6	68.4	127.2	101.6	204	258	238	88	166.4	17.2	540	202.8	201.6	140.4	257.2	C01190	-	-	-	-	-	-	ko00600,ko01100
LIPID-P-0300	HexCer(d18:1/25:0)	SP	HexCer-NS	43	1	826.713594	825.705769	[M+H]+	C49H95NO8	13000	11400	23320	17680	21880	23560	15880	10000	18960	1008	24880	9320	20960	13200	24360	C01190	HMDB0004979	-	20057360	-	-	-	ko00600,ko01100
LIPID-P-0302	HexCer(d18:1/16:1)	SP	HexCer-NS	34	2	698.557125	697.549269	[M+H]+	C40H75NO8	312.8	69.2	46.4	137.2	94.4	130.4	224.8	114.4	148.8	16.84	165.2	64.4	156.8	111.2	89.6	C01190	-	-	-	-	-	-	ko00600,ko01100
LIPID-P-0303	HexCer(d18:1/18:1)	SP	HexCer-NS	36	2	726.588425	725.580569	[M+H]+	C42H79NO8	3768	508	748	1348	1756	1756	1516	924	1424	294.4	1972	1116	1380	1016	1608	C01190	HMDB0004970	LMSP0501AA27	20057355	-	-	-	ko00600,ko01100
LIPID-P-0304	HexCer(d18:1/20:1)	SP	HexCer-NS	38	2	754.619725	753.611869	[M+H]+	C44H83NO8	1436	408	596	844	1220	440	1284	664	856	139.2	960	358.8	728	600	1036	C01190	-	-	-	-	-	-	ko00600,ko01100
LIPID-P-0305	HexCer(d18:1/22:1)	SP	HexCer-NS	40	2	782.651025	781.643169	[M+H]+	C46H87NO8	2340	1332	3388	972	1912	2092	2888	828	2404	97.2	4520	2084	2220	1768	3128	C01190	-	-	-	-	-	-	ko00600,ko01100
LIPID-P-0306	HexCer(d18:1/24:1)	SP	HexCer-NS	42	2	810.682325	809.674469	[M+H]+	C48H91NO8	408000	151600	308800	281200	440000	460000	377600	205600	324800	28200	1152000	393600	508000	325200	596000	C01190	HMDB0004975	LMSP0501AA08	20057357	-	-	-	ko00600,ko01100
LIPID-P-2240	HexCer(d18:2/24:2)	SP	HexCer-NS	42	4	626.5875858	805.6431688	[M-H2O+H]+	C48H87NO8	46	15.16	37.76	33.88	94.8	94.4	61.6	16.16	38.76	3.14	219.2	80.4	77.6	53.6	95.6	C01190	-	-	-	-	-	-	ko00600,ko01100
LIPID-P-0301	HexCer(d18:1/26:0)	SP	HexCer-NS	44	1	840.729225	839.721419	[M+H]+	C50H97NO8	91.2	52.4	90	132.4	126.8	105.6	50.4	59.2	62.8	19.96	524	23.12	126	82.4	135.6	C01190	HMDB0004977	LMSP0501AA11	20057359	-	-	-	ko00600,ko01100
LIPID-P-2205	HexCer(d17:1/18:0)	SP	HexCer-NS	35	1	534.5249855	713.5805685	[M-H2O+H]+	C41H79NO8	89.6	13.12	34.36	56.4	56.8	53.2	23.48	38.2	29.68	6.16	74.8	32.52	39.28	37.4	62	C01190	-	-	-	-	-	-	ko00600,ko01100
LIPID-P-2203	HexCer(d17:1/16:0)	SP	HexCer-NS	33	1	506.4936854	685.5492684	[M-H2O+H]+	C39H75NO8	267.2	33.32	78.4	108.8	113.6	135.2	143.2	133.2	105.2	35.2	156	60	99.6	67.6	66.4	C01190	-	-	-	-	-	-	ko00600,ko01100
LIPID-P-2250	HexCer(d19:1/23:0)	SP	HexCer-NS	42	1	632.634536	811.690119	[M-H2O+H]+	C48H93NO8	62.4	29.04	58.8	76.8	119.6	120.4	93.2	25.72	40.4	12.12	202	54.4	77.2	70	88	C01190	-	-	-	-	-	-	ko00600,ko01100
LIPID-P-2212	HexCer(d17:1/24:0)	SP	HexCer-NS	41	1	618.6188859	797.6744689	[M-H2O+H]+	C47H91NO8	60.4	36.4	63.6	51.2	105.2	119.6	55.2	52.8	68.4	4.24	167.2	58.8	78.4	60	92.4	C01190	-	-	-	-	-	-	ko00600,ko01100
LIPID-P-2230	HexCer(d18:1/25:1)	SP	HexCer-NS	43	2	644.634536	823.690119	[M-H2O+H]+	C49H93NO8	484	126.8	384	416	716	840	349.2	224.8	420	33.4	1688	389.2	640	452	692	C01190	-	-	-	-	-	-	ko00600,ko01100
LIPID-P-2213	HexCer(d17:1/24:2)	SP	HexCer-NS	41	3	614.5875858	793.6431688	[M-H2O+H]+	C47H87NO8	53.2	18.72	51.2	45.6	68	82.4	68	24.84	47.6	N/A	120	44.4	54.8	35.36	64	C01190	-	-	-	-	-	-	ko00600,ko01100
LIPID-P-2267	HexCer(d20:2/24:1)	SP	HexCer-NS	44	3	656.634536	835.690119	[M-H2O+H]+	C50H93NO8	47.2	9.12	18.12	60.8	60.8	26.4	25.92	17.12	28	6	192	47.2	73.2	39.8	61.6	C01190	-	-	-	-	-	-	ko00600,ko01100
LIPID-P-2263	HexCer(d20:1/24:1)	SP	HexCer-NS	44	2	658.650186	837.705769	[M-H2O+H]+	C50H95NO8	50	15.68	11.4	22.04	57.2	36.24	29.64	22.12	39.32	4.56	349.2	104.4	67.6	38.6	58.8	C01190	-	-	-	-	-	-	ko00600,ko01100
LIPID-P-2262	HexCer(d20:1/24:0)	SP	HexCer-NS	44	1	660.6658361	839.7214191	[M-H2O+H]+	C50H97NO8	69.2	30.04	55.2	79.2	44.8	54	71.6	30.76	31.64	18.28	552	87.6	112.4	85.6	137.6	C01190	-	-	-	-	-	-	ko00600,ko01100
LIPID-P-2253	HexCer(d19:1/24:1)	SP	HexCer-NS	43	2	644.634536	823.690119	[M-H2O+H]+	C49H93NO8	270.8	82	168.8	254.4	424	354.8	238	104.8	231.2	22.52	1388	271.2	390.8	263.2	362.8	C01190	-	-	-	-	-	-	ko00600,ko01100
LIPID-P-2252	HexCer(d19:1/24:0)	SP	HexCer-NS	43	1	646.650186	825.705769	[M-H2O+H]+	C49H95NO8	101.2	46.4	119.2	196	241.6	230.4	190.4	32.56	100.8	20.36	936	186	299.2	160	244.8	C01190	-	-	-	-	-	-	ko00600,ko01100
LIPID-P-2210	HexCer(d17:1/22:1)	SP	HexCer-NS	39	2	588.5719357	767.6275187	[M-H2O+H]+	C45H85NO8	50.4	109.6	140	46	75.6	54	100.4	36.12	91.2	1.584	42.8	31.12	88.8	73.2	129.2	C01190	-	-	-	-	-	-	ko00600,ko01100
LIPID-P-2248	HexCer(d19:1/22:0)	SP	HexCer-NS	41	1	618.6188859	797.6744689	[M-H2O+H]+	C47H91NO8	88.4	39.28	99.6	75.6	112.8	125.6	87.2	25.88	82.4	11.32	285.6	95.6	117.2	86	98.4	C01190	-	-	-	-	-	-	ko00600,ko01100
LIPID-P-2243	HexCer(d18:2/26:1)	SP	HexCer-NS	44	3	656.634536	835.690119	[M-H2O+H]+	C50H93NO8	33.44	N/A	N/A	14.6	32	29.88	N/A	10.32	8.08	N/A	217.6	58.8	51.6	30	47.6	C01190	-	-	-	-	-	-	ko00600,ko01100
LIPID-P-2242	HexCer(d18:2/26:0)	SP	HexCer-NS	44	2	658.650186	837.705769	[M-H2O+H]+	C50H95NO8	46.4	7.64	13.8	28.36	46.4	29.28	19	18.52	42.4	N/A	284.4	46	81.6	68.8	65.2	C01190	-	-	-	-	-	-	ko00600,ko01100
LIPID-P-2214	HexCer(d17:1/25:0)	SP	HexCer-NS	42	1	632.634536	811.690119	[M-H2O+H]+	C48H93NO8	61.2	75.2	148	162.8	76.4	129.2	110.4	89.2	119.2	13.76	78.8	40.4	104	90.4	143.2	C01190	-	-	-	-	-	-	ko00600,ko01100
LIPID-P-2216	HexCer(d17:1/26:0)	SP	HexCer-NS	43	1	646.650186	825.705769	[M-H2O+H]+	C49H95NO8	27.52	18.64	24.04	30.8	33.48	39.48	29.36	15.08	19.04	9.84	100.4	17.08	36.68	39.24	38.48	C01190	-	-	-	-	-	-	ko00600,ko01100
LIPID-P-2228	HexCer(d18:1/23:1)	SP	HexCer-NS	41	2	616.6032358	795.6588188	[M-H2O+H]+	C47H89NO8	720	496	1004	336	768	756	780	366.4	840	37.4	1608	532	860	636	1084	C01190	-	-	-	-	-	-	ko00600,ko01100
LIPID-N-0960	LNAPE(18:1/N-17:0)	GP	LNAPE	35	1	730.538681	731.546506	[M-H]-	C40H78NO8P	9.42	5.94	8.56	12.78	12.24	16.24	6.42	4.8	7.78	4.08	191.6	18.06	13.84	16.8	14.98	-	-	-	-	-	-	-	-
LIPID-N-0969	LNAPE(20:5/N-18:1)	GP	LNAPE	38	6	762.507381	763.515206	[M-H]-	C43H74NO8P	28.4	38	58.2	77	109.8	125.2	90	9.66	33	7.3	138.8	105.6	63.6	72.2	60.8	-	-	-	-	-	-	-	-
LIPID-N-0959	LNAPE(16:0/N-18:1)	GP	LNAPE	34	1	716.523031	717.530856	[M-H]-	C39H76NO8P	214	128	144	204	226	266	123.2	121.4	138	67.4	2520	270	268	314	250	-	-	-	-	-	-	-	-
LIPID-N-0970	LNAPE(22:4/N-18:2)	GP	LNAPE	40	6	790.538681	791.546506	[M-H]-	C45H78NO8P	1.25	0.386	0.924	0.576	1.15	1.896	0.496	0.458	0.4	0.416	12	1.186	1.198	1.206	0.758	-	-	-	-	-	-	-	-
LIPID-N-0957	LNAPE(16:0/N-16:0)	GP	LNAPE	32	0	690.507381	691.515206	[M-H]-	C37H74NO8P	10.46	3.08	6.06	9.7	8.66	10.76	4.9	5.06	5.26	2.98	96.2	12.44	9.18	7.88	8.06	-	-	-	-	-	-	-	-
LIPID-N-0964	LNAPE(18:1/N-18:2)	GP	LNAPE	36	3	740.523031	741.530856	[M-H]-	C41H76NO8P	264	212	334	480	480	624	322	102.8	240	81.8	2600	518	342	438	342	-	-	-	-	-	-	-	-
LIPID-N-0958	LNAPE(16:1/N-16:0)	GP	LNAPE	32	1	688.491731	689.499556	[M-H]-	C37H72NO8P	61.4	67.8	48.6	63	39	59.4	48.4	26.2	34.4	22	604	66.6	52.6	57.4	56.8	-	-	-	-	-	-	-	-
LIPID-N-0965	LNAPE(18:2/N-18:2)	GP	LNAPE	36	4	738.507381	739.515206	[M-H]-	C41H74NO8P	35.8	38.2	66.8	78	100.2	136.2	69.4	11.34	38	6.2	238	88	54.4	79.6	65.8	-	-	-	-	-	-	-	-
LIPID-N-0961	LNAPE(22:6/N-20:4)	GP	LNAPE	42	10	810.507381	811.515206	[M-H]-	C47H74NO8P	3.28	0.704	1.828	2.5	2.92	3.6	2.1	0.736	1.742	N/A	13.68	4.58	2.08	2.98	2.12	-	-	-	-	-	-	-	-
LIPID-N-0971	LNAPE(20:5/N-18:2)	GP	LNAPE	38	7	760.491731	761.499556	[M-H]-	C43H72NO8P	1.15	0.996	2.32	3.26	3.22	5.04	3.78	0.204	1	0.1726	2.42	2.48	1.634	2.54	1.614	-	-	-	-	-	-	-	-
LIPID-N-0972	LNAPE(22:5/N-20:2)	GP	LNAPE	42	7	816.554331	817.562156	[M-H]-	C47H80NO8P	7.8	2.78	4.2	3.02	3.2	7.66	5.68	2.44	3.64	1.464	54.2	7.34	3.12	4.58	4.02	-	-	-	-	-	-	-	-
LIPID-N-0973	LNAPE(22:6/N-20:1)	GP	LNAPE	42	7	816.554331	817.562156	[M-H]-	C47H80NO8P	55	46.2	78.8	64.4	82.6	114.8	75.8	26	46	12.56	202	85.8	48.6	64.8	49	-	-	-	-	-	-	-	-
LIPID-N-0975	LNAPE(22:6/N-18:2)	GP	LNAPE	40	8	786.507381	787.515206	[M-H]-	C45H74NO8P	24.6	9.24	20.8	24.4	23.4	35.4	28	6.18	15.1	2.7	113	43.6	20.6	25.2	21.8	-	-	-	-	-	-	-	-
LIPID-N-0976	LNAPE(20:4/N-22:4)	GP	LNAPE	42	8	814.538681	815.546506	[M-H]-	C47H78NO8P	0.612	N/A	0.776	0.412	0.696	0.95	0.382	0.624	0.326	0.342	5.44	2.12	0.468	0.582	0.328	-	-	-	-	-	-	-	-
LIPID-N-0977	LNAPE(22:6/N-20:3)	GP	LNAPE	42	9	812.523031	813.530856	[M-H]-	C47H76NO8P	2.34	0.966	2.1	4.48	3.72	5.12	2.36	1.112	2.52	0.606	13.28	4.38	2.56	3.22	2.8	-	-	-	-	-	-	-	-
LIPID-N-0967	LNAPE(20:5/N-16:1)	GP	LNAPE	36	6	734.476081	735.483906	[M-H]-	C41H70NO8P	0.79	1.306	1.968	1.702	2.66	2.46	2.68	0.33	0.728	0.362	3.74	2.66	1.448	2.08	1.762	-	-	-	-	-	-	-	-
LIPID-N-0968	LNAPE(20:4/N-18:2)	GP	LNAPE	38	6	762.507381	763.515206	[M-H]-	C43H74NO8P	75	57.2	106	111.8	138.8	198.2	117.4	25.4	70.2	13.32	304	143.8	82.8	108.4	83.4	-	-	-	-	-	-	-	-
LIPID-N-0966	LNAPE(24:5/N-18:0)	GP	LNAPE	42	5	820.585631	821.593456	[M-H]-	C47H84NO8P	0.328	0.1502	0.542	0.444	1.292	0.942	0.416	0.1522	0.244	N/A	1.226	1.024	0.532	0.786	0.468	-	-	-	-	-	-	-	-
LIPID-N-0615	LPA(16:0)	GP	LPA	16	0	409.235515	410.24334	[M-H]-	C19H39O7P	49.55	21.45	24.4	25.85	39.15	35.15	28	24.25	47.1	N/A	494.5	50	40.55	34.25	36.25	C00681	HMDB0007849	LMGP10050042	56960317	-	53478599	-	ko00561,ko00564,ko01100,ko04072,ko04080,ko04540,ko04810,ko04975,ko04977,ko05200
LIPID-N-0659	LPA(22:5)	GP	LPA	22	5	483.235517	482.243343	[M-H]-	C25H39O7P	160	13.8	18.05	19.45	13.45	52	26.4	32.7	29.1	14.05	213	65	40.55	35.55	28.3	C00681	-	-	-	-	-	-	ko00561,ko00564,ko01100,ko04072,ko04080,ko04540,ko04810,ko04975,ko04977,ko05200
LIPID-P-0391	LPC(22:5/0:0)	GP	LPC	22	5	570.363792	569.348141	[M+H]+	C30H52NO7P	18.3	7.44	14.52	13.2	18.42	23.6	14.94	6.9	12.2	1.474	144.6	34.4	19.76	19.58	19.1	C04230	HMDB0010402	LMGP01050142	53480475	-	-	-	ko00564,ko05231
LIPID-P-0369	LPC(17:1)	GP	LPC	17	1	508.33932	507.332491	[M+H]+	C25H50NO7P	2.5	2.68	3.86	3.96	2.98	3.44	3.76	0.918	3.38	0.636	8.68	3.54	3.66	3.2	3.2	C04230	-	LMGP01050002	42607442	-	-	-	ko00564,ko05231
LIPID-P-0367	LPC(15:1)	GP	LPC	15	1	480.30682	479.301191	[M+H]+	C23H46NO7P	0.278	0.0958	0.1196	0.172	0.1224	0.1852	0.1366	0.1014	0.1424	0.037	0.626	0.268	0.22	0.1748	0.1708	C04230	-	LMGP01050125	52924041	-	-	-	ko00564,ko05231
LIPID-P-0368	LPC(16:1)	GP	LPC	16	1	494.324667	493.316841	[M+H]+	C24H48NO7P	180	111	147.2	134.4	107.8	127.2	123.8	113.8	140.4	29.2	506	232	159.4	143.2	159	C04230	HMDB0010383	LMGP01050021	24779461	76790-27-7	-	-	ko00564,ko05231
LIPID-P-0366	LPC(14:1)	GP	LPC	14	1	466.293367	465.285541	[M+H]+	C22H44NO7P	0.252	0.0372	0.0862	0.1256	0.0832	0.1542	0.0994	0.082	0.0986	0.0274	0.442	0.224	0.134	0.1302	0.1132	C04230	HMDB0010380	LMGP01050014	24779456	-	-	-	ko00564,ko05231
LIPID-P-0364	LPC(24:0)	GP	LPC	24	0	608.465517	607.457691	[M+H]+	C32H66NO7P	0.66	0.234	0.43	0.7	0.536	0.386	0.272	0.368	0.32	0.1414	0.724	0.66	0.566	0.362	0.474	C04230	HMDB0010405	LMGP01050057	24779481	-	-	-	ko00564,ko05231
LIPID-P-0355	LPC(0:0/17:0)	GP	LPC	17	0	510.35565	509.348141	[M+H]+	C25H52NO7P	14.76	6.34	14.82	20.4	20.6	26.2	13.02	6.8	17.5	2.58	41	27	17.32	16.28	17.12	C04230	-	-	-	-	-	-	ko00564,ko05231
LIPID-P-0361	LPC(0:0/20:0)	GP	LPC	20	0	552.402917	551.395091	[M+H]+	C28H58NO7P	1.11	1.984	2.86	0.99	0.906	0.958	1.744	0.73	1.984	0.13	1.42	1.758	1.02	1.42	1.16	C04230	-	-	-	-	-	-	ko00564,ko05231
LIPID-P-0354	LPC(16:0/0:0)	GP	LPC	16	0	496.340317	495.332491	[M+H]+	C24H50NO7P	674	396	590	614	594	716	488	408	672	172	1830	1012	618	590	628	C04230	HMDB0010382	LMGP01050018	460602	17364-16-8	-	-	ko00564,ko05231
LIPID-P-0353	LPC(0:0/16:0)	GP	LPC	16	0	496.340317	495.332491	[M+H]+	C24H50NO7P	60.4	23.4	44.8	49	61.2	69.2	35.6	36.4	49	11.06	214	119.8	62.4	58.4	61.6	C04230	-	LMGP01050074	-	-	-	-	ko00564,ko05231
LIPID-P-0352	LPC(15:0/0:0)	GP	LPC	15	0	482.32181	481.316841	[M+H]+	C23H48NO7P	11.16	3.84	8	6.64	7.68	11.16	6	3.76	8.74	1.68	33	11.8	9.1	8.14	8.72	C04230	HMDB0010381	LMGP01050016	24779458	-	-	-	ko00564,ko05231
LIPID-P-0351	LPC(0:0/15:0)	GP	LPC	15	0	482.32181	481.316841	[M+H]+	C23H48NO7P	11	4.08	7.76	6.28	7.8	10.74	5.74	3.78	9.08	1.774	32.2	11.76	9.24	8.08	8.98	C04230	-	-	-	-	-	-	ko00564,ko05231
LIPID-P-0363	LPC(22:0)	GP	LPC	22	0	580.434217	579.426391	[M+H]+	C30H62NO7P	0.1998	0.076	0.1202	0.1766	0.117	0.074	0.0808	0.067	0.1046	0.027	0.171	0.1308	0.085	0.0902	0.119	C04230	HMDB0010398	LMGP01050053	24779479	-	-	-	ko00564,ko05231
LIPID-P-0370	LPC(0:0/18:1)	GP	LPC	18	1	522.355967	521.348141	[M+H]+	C26H52NO7P	692	358	538	522	518	620	426	608	570	188.8	2440	1084	618	594	636	C04230	-	LMGP01050079	24779492	-	-	-	ko00564,ko05231
LIPID-P-0371	LPC(18:1/0:0)	GP	LPC	18	1	522.355967	521.348141	[M+H]+	C26H52NO7P	98	115.2	169.8	222	176.6	164.8	176.2	67.2	146	31.2	208	202	135.8	133	148.6	C04230	HMDB0010385	LMGP01050029	53480465	-	-	-	ko00564,ko05231
LIPID-P-0372	LPC(19:1)	GP	LPC	19	1	536.37085	535.363791	[M+H]+	C27H54NO7P	2.32	2.02	3.32	4.86	4.3	2.48	4.68	1.466	3	0.508	3.14	3.08	2.96	3.2	3	C04230	-	LMGP01050130	52924049	-	-	-	ko00564,ko05231
LIPID-P-0392	LPC(22:6)	GP	LPC	22	6	568.340317	567.332491	[M+H]+	C30H50NO7P	872	300	624	598	676	950	578	474	732	112.2	1428	1306	690	698	684	C04230	HMDB0010404	LMGP01050056	10415542	162440-05-3	-	-	ko00564,ko05231
LIPID-P-0389	LPC(20:5)	GP	LPC	20	5	542.324667	541.316841	[M+H]+	C28H48NO7P	54	19.2	45.4	60.6	53.8	72.6	64.2	22.4	43.4	6.74	76.8	110.4	56	54.2	53.8	C04230	HMDB0010397	LMGP01050050	11757087	-	-	-	ko00564,ko05231
LIPID-P-0388	LPC(22:4/0:0)	GP	LPC	22	4	572.371617	571.363791	[M+H]+	C30H54NO7P	9.44	4.54	8.02	8.08	9.3	10.16	7.84	6.02	7.38	1.172	38	16.06	8.94	9.22	8.8	C04230	HMDB0010401	LMGP01050124	52924039	-	-	-	ko00564,ko05231
LIPID-P-0387	LPC(0:0/22:4)	GP	LPC	22	4	572.371617	571.363791	[M+H]+	C30H54NO7P	8.46	4	6.88	7.02	8.28	8.82	6.82	6.64	6.44	1.134	31.8	13.46	7.78	7.98	7.76	C04230	-	-	-	-	-	-	ko00564,ko05231
LIPID-P-0386	LPC(20:4)	GP	LPC	20	4	544.340317	543.332491	[M+H]+	C28H50NO7P	13.84	3.44	8.12	7.98	8.54	10.14	6.62	9.46	11.52	1.764	22.4	17.68	8.62	9.04	9.94	C04230	HMDB0010395	LMGP01050048	24779476	60701-99-7	-	-	ko00564,ko05231
LIPID-P-0385	LPC(18:4)	GP	LPC	18	4	516.309017	515.301191	[M+H]+	C26H46NO7P	0.482	0.114	0.312	0.276	0.284	0.328	0.25	0.304	0.318	0.0494	0.59	0.476	0.35	0.344	0.34	C04230	HMDB0010389	LMGP01050040	52924047	-	-	-	ko00564,ko05231
LIPID-P-0384	LPC(20:3)	GP	LPC	20	3	546.355967	545.348141	[M+H]+	C28H52NO7P	426	115.8	272	276	282	324	246	260	292	49.6	476	686	308	308	306	C04230	HMDB0010393	LMGP01050133	53480467	1199257-41-4	-	-	ko00564,ko05231
LIPID-P-0383	LPC(18:3)	GP	LPC	18	3	518.324667	517.316841	[M+H]+	C26H48NO7P	40.6	9.54	19.82	22.6	16.12	25.4	18.16	20.8	21.8	4.9	48.8	48.2	25	24.2	24.6	C04230	HMDB0010388	LMGP01050038	24779469	-	-	-	ko00564,ko05231
LIPID-P-0350	LPC(14:0)	GP	LPC	14	0	468.309017	467.301191	[M+H]+	C22H46NO7P	9.66	2.92	5.26	6.82	5.06	6.68	5.3	2.58	5.4	1.38	22.8	7.16	6.78	6.46	6.94	C04230	HMDB0010379	LMGP01050012	460604	20559-16-4	-	-	ko00564,ko05231
LIPID-P-0382	LPC(22:2)	GP	LPC	22	2	576.402917	575.395091	[M+H]+	C30H58NO7P	0.0576	0.0216	0.00512	0.029	0.01936	0.0332	0.0222	0.0294	0.0468	0.00918	0.0764	0.172	0.0346	0.0552	0.038	C04230	HMDB0010400	LMGP01050135	52924059	-	-	-	ko00564,ko05231
LIPID-P-0359	LPC(0:0/19:0)	GP	LPC	19	0	538.387627	537.379441	[M+H]+	C27H56NO7P	1.984	2.24	4.18	3.56	3.58	4.22	2.48	1.642	3.6	0.392	3.46	3.7	2.04	2.8	2.52	C04230	-	-	-	-	-	-	ko00564,ko05231
LIPID-P-1929	LPC(16:2)	GP	LPC	16	2	492.309016	491.301191	[M+H]+	C24H46NO7P	28.6	15.08	22.4	19.74	14.64	16.76	20.2	15.08	19.74	2.82	63.6	25.6	18.96	22.2	32.8	C04230	-	-	-	-	-	-	ko00564,ko05231
LIPID-P-1931	LPC(16:3)	GP	LPC	16	3	490.293366	489.285541	[M+H]+	C24H44NO7P	0.812	0.308	0.438	0.61	0.308	0.542	0.412	0.378	0.486	0.0502	2.24	0.794	0.556	0.758	0.75	C04230	-	-	-	-	-	-	ko00564,ko05231
LIPID-P-0360	LPC(19:0/0:0)	GP	LPC	19	0	538.387627	537.379441	[M+H]+	C27H56NO7P	1.806	2.04	3.86	3.14	3.32	3.86	2.24	1.46	3.28	0.35	3.24	3.4	1.816	2.56	2.4	C04230	-	LMGP01050041	24779472	-	-	-	ko00564,ko05231
LIPID-P-0381	LPC(20:2/0:0)	GP	LPC	20	2	548.371617	547.363791	[M+H]+	C28H54NO7P	1.81	1.07	1.648	3.48	1.986	1.552	1.608	2.06	1.688	0.44	2.82	2.04	1.792	2.02	1.824	C04230	HMDB0010392	LMGP01050132	52924053	-	-	-	ko00564,ko05231
LIPID-P-0380	LPC(0:0/20:2)	GP	LPC	20	2	548.371617	547.363791	[M+H]+	C28H54NO7P	23.4	9.54	14.34	18.98	19.34	17.04	14.2	23.8	18.02	4.1	27.6	26.4	17.3	17.54	17.28	C04230	-	-	-	-	-	-	ko00564,ko05231
LIPID-P-0379	LPC(18:2/0:0)	GP	LPC	18	2	520.340317	519.332491	[M+H]+	C26H50NO7P	614	236	494	524	528	580	440	370	444	120	1228	1094	532	538	548	C04230	HMDB0010386	LMGP01050034	11005824	22252-07-9	-	-	ko00564,ko05231
LIPID-P-0378	LPC(0:0/18:2)	GP	LPC	18	2	520.340317	519.332491	[M+H]+	C26H50NO7P	596	226	480	496	512	622	424	368	442	114.4	1228	1098	526	514	528	C04230	-	-	-	-	-	-	ko00564,ko05231
LIPID-P-0377	LPC(24:1)	GP	LPC	24	1	606.449867	605.442041	[M+H]+	C32H64NO7P	0.1502	0.076	0.0786	0.1282	0.13	0.1382	0.0768	0.0826	0.085	0.0312	0.352	0.312	0.133	0.1292	0.175	C04230	HMDB0010406	LMGP01050144	53480477	-	-	-	ko00564,ko05231
LIPID-P-0376	LPC(22:1/0:0)	GP	LPC	22	1	578.418567	577.410741	[M+H]+	C30H60NO7P	0.1724	0.262	0.296	0.234	0.208	0.272	0.149	0.1376	0.25	0.0276	0.412	0.47	0.1782	0.254	0.202	C04230	HMDB0010399	LMGP01050134	53480471	-	-	-	ko00564,ko05231
LIPID-P-0375	LPC(0:0/22:1)	GP	LPC	22	1	578.418567	577.410741	[M+H]+	C30H60NO7P	0.1644	0.264	0.302	0.216	0.214	0.242	0.1484	0.1386	0.256	0.0338	0.446	0.452	0.1878	0.226	0.212	C04230	-	-	-	-	-	-	ko00564,ko05231
LIPID-P-0374	LPC(20:1/0:0)	GP	LPC	20	1	550.387267	549.379441	[M+H]+	C28H56NO7P	11.3	15.48	20.6	18.02	15.34	11.38	20.8	7.84	17.64	1.866	14.8	19.18	14.88	15.42	14.88	C04230	HMDB0010391	LMGP01050047	52924051	-	-	-	ko00564,ko05231
LIPID-P-0373	LPC(0:0/20:1)	GP	LPC	20	1	550.387267	549.379441	[M+H]+	C28H56NO7P	11.5	15.82	20.8	17.58	14.88	11.32	20.6	7.9	17.72	1.888	14.88	19.66	14.62	15.46	14.68	C04230	-	-	-	-	-	-	ko00564,ko05231
LIPID-P-0390	LPC(0:0/22:5)	GP	LPC	22	5	570.363792	569.348141	[M+H]+	C30H52NO7P	33.6	11.62	25.2	23.6	26.4	39	22.8	18.9	29.6	4.52	56	52.2	27.4	27.8	27.8	C04230	-	-	-	-	-	-	ko00564,ko05231
LIPID-P-0358	LPC(18:0/0:0)	GP	LPC	18	0	524.371617	523.363791	[M+H]+	C26H54NO7P	368	238	386	616	536	586	384	260	438	111.2	822	680	398	440	404	C04230	HMDB0010384	LMGP01050026	497299	19420-57-6	-	-	ko00564,ko05231
LIPID-P-0362	LPC(20:0/0:0)	GP	LPC	20	0	552.402917	551.395091	[M+H]+	C28H58NO7P	1.112	2.06	2.88	0.98	0.926	0.994	1.762	0.716	1.96	0.1206	1.486	1.722	0.992	1.472	1.18	C04230	HMDB0010390	LMGP01050045	24779473	108341-80-6	-	-	ko00564,ko05231
LIPID-P-0357	LPC(0:0/18:0)	GP	LPC	18	0	524.371617	523.363791	[M+H]+	C26H54NO7P	364	240	390	600	514	578	378	248	440	108.8	804	660	390	424	402	C04230	HMDB0011128	LMGP01050076	24779491	4421-58-3	-	-	ko00564,ko05231
LIPID-P-0356	LPC(17:0/0:0)	GP	LPC	17	0	510.35565	509.348141	[M+H]+	C25H52NO7P	14.44	6.5	15	20.4	21	26.2	16.6	7.26	17.56	2.6	43.6	27.6	17.16	16.26	16.68	C04230	HMDB0012108	LMGP01050024	24779463	50930-23-9	-	-	ko00564,ko05231
LIPID-P-0406	LPC(O-20:3)	GP	LPC-O	20	3	532.376725	531.368876	[M+H]+	C28H54NO6P	0.3	0.304	0.292	0.268	0.286	0.292	0.278	0.318	0.302	0.354	0.296	0.278	0.288	0.268	0.28	C04317	-	-	-	-	-	-	ko00565,ko01100
LIPID-P-0404	LPC(O-20:2)	GP	LPC-O	20	2	534.392325	533.384526	[M+H]+	C28H56NO6P	0.01354	0.0072	0.0135	0.01126	0.0158	0.01314	0.01214	0.00976	0.00654	N/A	0.0506	0.0218	0.01716	0.01364	0.01044	C04317	-	-	-	-	-	-	ko00565,ko01100
LIPID-P-0403	LPC(O-18:2)	GP	LPC-O	18	2	506.361025	505.353226	[M+H]+	C26H52NO6P	0.0638	0.046	0.1084	0.0738	0.0894	0.1294	0.076	0.0364	0.0528	0.01854	0.1776	0.177	0.087	0.0906	0.0862	C04317	HMDB0010408	LMGP01070012	24779513	-	-	-	ko00565,ko01100
LIPID-P-0401	LPC(O-20:1)	GP	LPC-O	20	1	536.408025	535.400176	[M+H]+	C28H58NO6P	0.1094	0.0566	0.0806	0.1214	0.1248	0.1688	0.0878	0.051	0.0612	0.01678	0.222	0.1936	0.0782	0.1002	0.0928	C04317	-	-	-	-	-	-	ko00565,ko01100
LIPID-P-0400	LPC(O-18:1)	GP	LPC-O	18	1	508.376725	507.368876	[M+H]+	C26H54NO6P	5.96	4.9	8.68	7.18	7.82	10.2	6.88	2.78	4.56	0.718	17.62	16.92	8.04	7.8	7.66	C04317	-	LMGP01060034	21672239	-	-	-	ko00565,ko01100
LIPID-P-0399	LPC(O-16:1)	GP	LPC-O	16	1	480.345402	479.337576	[M+H]+	C24H50NO6P	0.348	0.1394	0.1858	0.238	0.382	0.426	0.228	0.1296	0.1844	0.0506	0.882	0.452	0.312	0.29	0.296	C04317	-	LMGP01060028	24779503	-	-	-	ko00565,ko01100
LIPID-P-0397	LPC(O-22:0)	GP	LPC-O	22	0	566.454925	565.447126	[M+H]+	C30H64NO6P	0.36	0.0984	0.113	0.452	0.436	0.318	0.202	0.129	0.0902	0.0872	0.356	0.1962	0.256	0.276	0.252	C04317	-	-	-	-	-	-	ko00565,ko01100
LIPID-P-0396	LPC(O-20:0)	GP	LPC-O	20	0	538.423625	537.415826	[M+H]+	C28H60NO6P	0.181	0.0958	0.1136	0.39	0.414	0.384	0.1752	0.0746	0.0746	0.0534	0.47	0.278	0.202	0.22	0.1874	C04317	-	LMGP01060041	52924061	-	-	-	ko00565,ko01100
LIPID-P-0395	LPC(O-18:0)	GP	LPC-O	18	0	510.392325	509.384526	[M+H]+	C26H56NO6P	1.766	1.162	1.98	2.76	2.84	3.06	2.14	0.72	1.162	0.374	5.1	3.92	1.978	2.28	2.02	C04317	HMDB0011149	LMGP01060014	2733532	74430-89-0	-	-	ko00565,ko01100
LIPID-P-0394	LPC(O-16:0)	GP	LPC-O	16	0	482.361025	481.353226	[M+H]+	C24H52NO6P	4.04	5.28	8.6	8.12	8.46	10.8	7.7	2.34	3.72	0.926	14.84	12.82	8.08	7.04	7.28	C04317	-	LMGP01060010	162126	-	-	-	ko00565,ko01100
LIPID-P-0393	LPC(O-14:0)	GP	LPC-O	14	0	454.329725	453.321926	[M+H]+	C22H48NO6P	0.0472	0.0508	0.0706	0.0712	0.0842	0.0878	0.065	0.0224	0.0348	0.00858	0.111	0.0768	0.0712	0.0568	0.059	C04317	-	LMGP01060007	15298292	-	-	-	ko00565,ko01100
LIPID-P-1936	LPC(O-24:1)	GP	LPC-O	24	1	592.470601	591.462776	[M+H]+	C32H66NO6P	1.048	0.236	0.266	0.746	1.154	0.404	0.43	0.1646	0.1818	0.1128	0.818	0.24	0.482	0.728	0.86	C04317	-	-	-	-	-	-	ko00565,ko01100
LIPID-P-1937	LPC(O-24:0)	GP	LPC-O	24	0	594.486251	593.478426	[M+H]+	C32H68NO6P	0.578	0.328	0.316	0.978	0.56	0.466	0.43	0.34	0.1656	0.296	N/A	0.356	0.332	0.566	0.368	C04317	-	-	-	-	-	-	ko00565,ko01100
LIPID-P-0423	LPE(0:0/18:2)	GP	LPE	18	2	478.293364	477.285541	[M+H]+	C23H44NO7P	161.8	46.6	88.6	129.8	122.6	199.8	110	50.4	91	15.84	514	288	153	135.2	144.2	C04438	HMDB0011477	LMGP02050041	53480926	-	-	-	ko00564
LIPID-P-0424	LPE(18:2/0:0)	GP	LPE	18	2	478.293364	477.285541	[M+H]+	C23H44NO7P	262	80.6	156.8	238	199.6	336	180.6	72.8	157.4	26.4	886	494	248	230	222	C04438	HMDB0011507	LMGP02050011	52925130	85046-18-0	-	-	ko00564
LIPID-P-0407	LPE(0:0/16:0)	GP	LPE	16	0	454.293364	453.285541	[M+H]+	C21H44NO7P	1618	804	990	1338	1126	1710	1142	652	1080	224	3700	1940	1268	1168	1328	C04438	HMDB0011473	LMGP02050036	53480922	-	-	-	ko00564
LIPID-P-0408	LPE(16:0/0:0)	GP	LPE	16	0	454.293364	453.285541	[M+H]+	C21H44NO7P	1564	794	992	1316	1120	1706	1180	618	1126	238	3580	1960	1240	1194	1322	C04438	HMDB0011503	LMGP02050002	9547069	53862-35-4	-	-	ko00564
LIPID-P-0409	LPE(17:0)	GP	LPE	17	0	468.30493	467.301191	[M+H]+	C22H46NO7P	103.8	40.8	79.4	92.6	76.2	160.8	82.8	34	88	6.76	189.8	177.6	106.8	87.2	83.8	C04438	-	LMGP02050030	52925149	-	-	-	ko00564
LIPID-P-0410	LPE(0:0/18:0)	GP	LPE	18	0	482.324664	481.316841	[M+H]+	C23H48NO7P	1744	796	1332	1482	1104	2520	1244	670	1552	141.6	4660	3180	1616	1478	1476	C04438	HMDB0011129	LMGP02050038	53480667	899443-67-5	-	-	ko00564
LIPID-P-0411	LPE(18:0/0:0)	GP	LPE	18	0	482.324664	481.316841	[M+H]+	C23H48NO7P	1724	802	1322	1448	1122	2520	1262	682	1492	138.6	4460	3280	1640	1478	1536	C04438	HMDB0011130	LMGP02050001	9547068	69747-55-3	-	-	ko00564
LIPID-P-0412	LPE(20:0)	GP	LPE	20	0	510.355965	509.348141	[M+H]+	C25H52NO7P	1.756	3.42	4.48	1.096	0.884	1.802	3.18	0.8	3.58	N/A	4.3	3.82	3.08	2.8	2.56	C04438	HMDB0011481	LMGP02050045	53480930	-	-	-	ko00564
LIPID-P-0415	LPE(16:1)	GP	LPE	16	1	452.277714	451.269891	[M+H]+	C21H42NO7P	18.76	21.2	23	40.6	23.6	25.8	36.6	9	16.58	6.22	56.8	27.4	23.4	22.8	23.8	C04438	HMDB0011474	LMGP02050037	53480923	-	-	-	ko00564
LIPID-P-0416	LPE(17:1)	GP	LPE	17	1	466.29028	465.285541	[M+H]+	C22H44NO7P	9.7	6.06	10.86	16.42	12	14.96	13.18	2.82	8.58	1.516	26.4	18.56	12.06	12.22	11.62	C04438	-	LMGP02050008	42607464	-	-	-	ko00564
LIPID-P-0417	LPE(0:0/18:1)	GP	LPE	18	1	480.309014	479.301191	[M+H]+	C23H46NO7P	974	672	922	1432	1004	1402	1014	426	938	151.6	2580	1896	1104	1068	1078	C04438	HMDB0011476	LMGP02050040	53480925	-	-	-	ko00564
LIPID-P-0418	LPE(18:1/0:0)	GP	LPE	18	1	480.309014	479.301191	[M+H]+	C23H46NO7P	994	686	962	1612	1020	1374	1040	432	918	151.4	2440	1818	1070	1080	1022	C04438	HMDB0011506	LMGP02050004	9547071	89576-29-4	-	-	ko00564
LIPID-P-0419	LPE(0:0/20:1)	GP	LPE	20	1	508.340315	507.332491	[M+H]+	C25H50NO7P	41	38.4	50.6	36.4	30.8	42.8	44	20.4	49.6	3.72	83.2	64.4	34	43.4	35.4	C04438	HMDB0011482	LMGP02050046	53480931	-	-	-	ko00564
LIPID-P-0420	LPE(20:1/0:0)	GP	LPE	20	1	508.340315	507.332491	[M+H]+	C25H50NO7P	40.6	38.8	48	35.6	29.6	41.6	43	21.2	47.8	3.62	75.4	64.6	32.6	42.8	35.6	C04438	HMDB0011512	LMGP02050020	52925139	-	-	-	ko00564
LIPID-P-0421	LPE(22:1)	GP	LPE	22	1	536.371617	535.363791	[M+H]+	C27H54NO7P	0.606	0.728	0.89	0.442	0.442	0.86	0.458	0.464	0.784	0.1082	2.26	1.91	1.002	1.186	0.91	C04438	HMDB0011491	LMGP02050055	53480940	-	-	-	ko00564
LIPID-P-1533	LPE(15:0)	GP	LPE	15	0	440.277716	439.269891	[M+H]+	C20H42NO7P	1.502	0.364	0.778	0.962	0.768	0.904	0.694	0.51	0.772	0.39	1.906	1.142	0.848	0.836	0.948	C04438	HMDB0011502	LMGP02050031	52925150	-	-	-	ko00564
LIPID-P-0430	LPE(20:3/0:0)	GP	LPE	20	3	504.309014	531.332491	[M+H]+	C27H50NO7P	25.2	13.1	19.86	40.4	29.2	34.8	14.48	20.6	22	7.5	83.6	54.6	28.4	30.2	26.2	C04438	HMDB0011516	LMGP02050022	52925141	-	-	-	ko00564
LIPID-P-0425	LPE(0:0/20:2)	GP	LPE	20	2	506.324664	505.316841	[M+H]+	C25H48NO7P	6.3	1.372	2.96	3.84	1.914	3.2	1.592	3.2	5.1	1.126	16.84	9	4.24	5.06	3.96	C04438	HMDB0011483	LMGP02050047	53480932	-	-	-	ko00564
LIPID-P-0426	LPE(20:2/0:0)	GP	LPE	20	2	506.324664	505.316841	[M+H]+	C25H48NO7P	6.02	2.74	4.78	7.62	3.7	4.52	5.66	1.814	4.92	0.58	8.44	9.2	6.16	5.52	3.74	C04438	HMDB0011513	LMGP02050021	52925140	-	-	-	ko00564
LIPID-P-0427	LPE(22:2)	GP	LPE	22	2	534.355967	533.348141	[M+H]+	C27H52NO7P	0.278	N/A	0.264	0.384	0.264	0.262	0.1466	0.412	0.1888	0.1236	3.04	0.576	0.286	0.49	0.414	C04438	HMDB0011492	LMGP02050056	53480941	-	-	-	ko00564
LIPID-P-0437	LPE(22:6)	GP	LPE	22	6	526.293364	525.285541	[M+H]+	C27H44NO7P	3520	672	1292	1354	1432	2700	1584	900	1780	272	9280	3840	1972	2040	1978	C04438	HMDB0011496	LMGP02050060	53480945	-	-	-	ko00564
LIPID-P-0428	LPE(18:3)	GP	LPE	18	3	476.277714	475.269891	[M+H]+	C23H42NO7P	9.92	1.3	3.22	5.42	3.98	8.62	4.48	2.4	3.94	0.6	14.94	11.86	8.04	6.22	5.62	C04438	HMDB0011478	LMGP02050042	53480927	-	-	-	ko00564
LIPID-P-0429	LPE(0:0/20:3)	GP	LPE	20	3	504.309014	503.301191	[M+H]+	C25H46NO7P	248	48.2	99.6	127.8	137.2	212	103.4	76.6	123.6	13.44	462	408	190	153.8	150.4	C04438	-	LMGP02050049	53480934	-	-	-	ko00564
LIPID-P-0431	LPE(22:3)	GP	LPE	22	3	532.340316	531.332491	[M+H]+	C27H50NO7P	4	1.372	2.82	4.1	5	3.36	1.802	2.18	2.94	1.162	30.8	6.1	3.98	3.98	3.88	C04438	-	-	-	-	-	-	ko00564
LIPID-P-0436	LPE(22:5/0:0)	GP	LPE	22	5	528.309014	527.301191	[M+H]+	C27H46NO7P	982	63	185.4	133.4	101.8	176.8	126.4	268	410	44.4	938	320	298	300	234	C04438	HMDB0011524	LMGP02050069	53480954	-	-	-	ko00564
LIPID-P-0435	LPE(0:0/22:5)	GP	LPE	22	5	528.309014	527.301191	[M+H]+	C27H46NO7P	61.6	13.02	32.4	34.4	51.6	63.6	40.2	15.2	27	3.5	1016	120.2	70.2	76.6	59	C04438	HMDB0011494	LMGP02050058	53480943	-	-	-	ko00564
LIPID-P-0434	LPE(20:5)	GP	LPE	20	5	500.277714	499.269891	[M+H]+	C25H42NO7P	54	15.6	35.2	52.8	51.4	70	57.8	13.12	33.6	3.96	101	139.8	62.4	57.4	45.8	C04438	-	LMGP02050053	53480938	-	-	-	ko00564
LIPID-P-0433	LPE(22:4)	GP	LPE	22	4	530.324664	529.316841	[M+H]+	C27H48NO7P	60.2	12.16	28.8	26	43.8	45.6	24.4	18.24	28	3.28	390	75.8	44.4	48	40.4	C04438	HMDB0011493	LMGP02050057	53480942	-	-	-	ko00564
LIPID-P-0432	LPE(20:4)	GP	LPE	20	4	502.293364	501.285541	[M+H]+	C25H44NO7P	1662	544	984	970	916	1560	958	680	1064	104.2	3160	2280	1272	1130	1126	C04438	HMDB0011487	LMGP02050051	53480936	-	-	-	ko00564
LIPID-P-0439	LPE(P-17:0)	GP	LPE-P	17	0	452.31046	451.306276	[M+H]+	C22H46NO6P	1.502	0.496	1.156	0.892	1.534	2.78	1.036	0.542	0.996	0.27	5.06	3.72	1.286	1.812	1.334	C04635	-	-	-	-	-	-	ko00565,ko01100
LIPID-P-0440	LPE(P-18:0)	GP	LPE-P	18	0	466.3	465.321926	[M+H]+	C23H48NO6P	16.88	5.54	8.74	10.88	15.76	20.4	10.96	5.36	8.54	2.04	45	37.6	10.1	14.48	11.74	C04635	HMDB0240598	LMGP02070002	42607470	174062-73-8	-	-	ko00565,ko01100
LIPID-P-0438	LPE(P-16:0)	GP	LPE-P	16	0	438.3	437.290626	[M+H]+	C21H44NO6P	44	14.34	29.2	28.6	43.8	71.4	29.8	18.02	25.4	6.18	164	144.2	53.2	44.2	39.2	C04635	HMDB0011152	LMGP02070001	42607469	174062-72-7	-	-	ko00565,ko01100
LIPID-P-0445	LPE(P-18:1)	GP	LPE-P	18	1	464.3	463.306276	[M+H]+	C23H46NO6P	1.378	0.43	0.85	1.29	1.696	2.88	0.864	0.364	0.964	0.254	6.46	5.36	1.632	1.952	1.16	C04635	-	-	-	-	-	-	ko00565,ko01100
LIPID-P-0441	LPE(P-20:0)	GP	LPE-P	20	0	494.3	493.353226	[M+H]+	C25H52NO6P	2.9	0.646	0.702	1.96	2.24	2.88	1.112	0.714	0.956	0.276	3.58	2.56	1.908	1.546	1.672	C04635	-	LMGP02070004	52925153	-	-	-	ko00565,ko01100
LIPID-N-0169	LPG(16:1)	GP	LPG	16	1	481.25803	482.264472	[M-H]-	C22H43O9P	13.2	1.58	1.282	2.3	2.38	3.68	1.828	5.8	2.9	1.808	141.2	5.54	6.16	6.36	6.12	C18126	-	LMGP04050013	52927436	-	-	-	ko00564
LIPID-N-0665	LPG(20:2)	GP	LPG	20	2	535.303597	536.311422	[M-H]-	C26H49O9P	7.2	0.49	0.518	0.996	1.44	1.476	0.59	3.46	0.982	0.878	42.4	2.14	2.56	2.98	3.22	C18126	-	LMGP04050024	52927447	-	-	-	ko00564
LIPID-N-0661	LPG(17:0)	GP	LPG	17	0	497.287947	498.295772	[M-H]-	C23H47O9P	2.1	1.732	1.918	1.902	2.1	2.1	1.836	2	2.18	1.968	2.4	2.06	1.878	2.08	1.982	C18126	-	LMGP04050033	52927456	-	-	-	ko00564
LIPID-N-0166	LPG(16:0)	GP	LPG	16	0	483.272298	484.280122	[M-H]-	C22H45O9P	28.6	5.68	6.7	8.18	5.86	12.98	10.12	10.32	11.3	3.06	70.2	26.8	12.28	12.88	13.28	C18126	-	LMGP04050008	42607483	-	-	-	ko00564
LIPID-N-0167	LPG(18:0)	GP	LPG	18	0	511.303597	512.311422	[M-H]-	C24H49O9P	8.22	0.956	1.346	2.2	1.924	3.52	1.258	5.18	2.98	1.762	17.9	4.72	3.06	3.26	3.64	C18126	-	LMGP04050009	42607484	-	-	-	ko00564
LIPID-N-0174	LPG(22:6)	GP	LPG	22	6	557.2901	556.280122	[M-H]-	C28H45O9P	18.96	0.484	0.838	1.834	3.18	4.54	1.916	4.82	3	1.73	120	5.76	5.24	7.46	7	C18126	-	LMGP04050016	52927439	-	-	-	ko00564
LIPID-N-0173	LPG(22:5)	GP	LPG	22	5	555.27313	558.295772	[M-H]-	C28H47O9P	12.64	0.326	0.418	0.542	0.62	1.102	0.486	3.8	1.718	1.294	36.2	1.258	2.46	2.9	3.18	C18126	-	-	-	-	-	-	ko00564
LIPID-N-0172	LPG(20:4)	GP	LPG	20	4	531.26959	532.280122	[M-H]-	C26H45O9P	4.24	0.248	N/A	0.296	1.026	0.558	0.3	1.364	0.51	0.368	66.8	2.54	2.14	2.72	2.7	C18126	-	LMGP04050010	42607485	-	-	-	ko00564
LIPID-N-0171	LPG(18:2)	GP	LPG	18	2	507.272298	508.280122	[M-H]-	C24H45O9P	34.4	3.58	4.8	7.62	8.32	14.38	5.54	11.8	9.28	4.02	270	25.2	15.22	17.38	17.96	C18126	-	LMGP04050014	52927437	-	-	-	ko00564
LIPID-N-0170	LPG(18:1)	GP	LPG	18	1	509.287948	510.295772	[M-H]-	C24H47O9P	11.1	1.866	1.492	3.88	3.82	5.18	2.2	6.56	2.9	2.84	100.6	5.46	5.86	5.96	7.26	C18126	-	LMGP04050006	9547135	-	-	-	ko00564
LIPID-N-0668	LPG(22:4)	GP	LPG	22	4	559.303597	560.311422	[M-H]-	C28H49O9P	2.24	0.0644	0.202	0.23	0.522	0.544	0.244	0.732	0.406	0.218	36.6	1.86	1.298	1.53	1.676	C18126	-	LMGP04050017	52927440	-	-	-	ko00564
LIPID-N-0666	LPG(20:3)	GP	LPG	20	3	533.287947	534.295772	[M-H]-	C26H47O9P	9.32	0.696	0.892	1.666	1.986	3.4	1.202	3.88	1.898	0.98	70.6	5	4	4.38	4.66	C18126	-	LMGP04050025	52927448	-	-	-	ko00564
LIPID-N-0182	LPI(22:4)	GP	LPI	22	4	647.319643	648.327467	[M-H]-	C31H53O12P	10.68	4.74	3.84	2.46	6	4.76	4.3	2.94	3.56	0.63	37	12.18	5.02	4.82	4.12	C03819	-	LMGP06050013	52928608	-	-	-	ko00564
LIPID-N-0184	LPI(22:5)	GP	LPI	22	5	645.303993	646.311817	[M-H]-	C31H51O12P	11.56	2.44	4.2	1.66	2.32	2.66	1.952	4.98	7.86	0.858	N/A	6.14	3.64	2.78	3.46	C03819	-	-	-	-	-	-	ko00564
LIPID-N-0681	LPI(17:0)	GP	LPI	17	0	585.303992	586.311817	[M-H]-	C26H51O12P	24.8	12.9	16.56	11.88	28.8	39.8	15.38	10.9	20.8	1.55	87.8	36.4	16.88	15.78	16.7	C03819	-	LMGP06050029	52928624	-	-	-	ko00564
LIPID-N-0179	LPI(18:2)	GP	LPI	18	2	595.288343	596.296167	[M-H]-	C27H49O12P	10.86	6	4.6	5.08	7.04	5.78	2.42	2.92	5.52	0.754	91	21.8	6.62	4.38	5.62	C03819	-	LMGP06050010	52928605	-	-	-	ko00564
LIPID-N-0684	LPI(20:0)	GP	LPI	20	0	627.350942	628.358767	[M-H]-	C29H57O12P	4.72	18.96	15.36	1.404	3.68	4.42	9.04	2.94	11.54	N/A	31.8	7.96	7.42	6.28	6.42	C03819	-	LMGP06050011	52928606	-	-	-	ko00564
LIPID-N-0180	LPI(20:3)	GP	LPI	20	3	621.303993	622.311817	[M-H]-	C29H51O12P	234	118.8	143.2	195.8	258	230	94.2	148.2	193.8	44.8	914	492	182.6	165.6	171.4	C03819	-	LMGP06050021	52928616	-	-	-	ko00564
LIPID-N-0181	LPI(20:4)	GP	LPI	20	4	619.288343	620.296167	[M-H]-	C29H49O12P	468	126.2	197.6	168.8	424	390	214	162.4	228	32.8	2520	680	274	212	220	C03819	-	LMGP06050006	42607497	-	-	-	ko00564
LIPID-N-0686	LPI(20:2)	GP	LPI	20	2	623.319642	624.327467	[M-H]-	C29H53O12P	8.34	10.6	8.7	13.46	21.6	14.06	5.14	7.58	6.38	1.934	18.96	15.78	11	8.3	8	C03819	-	LMGP06050020	52928615	-	-	-	ko00564
LIPID-N-0178	LPI(18:1)	GP	LPI	18	1	597.303993	598.311817	[M-H]-	C27H51O12P	86.8	142.2	124	85.4	141.2	149	122.2	61.8	111.4	14.18	254	204	97.6	95.2	94	C03819	-	LMGP06050005	42607496	-	-	-	ko00564
LIPID-N-0175	LPI(16:0)	GP	LPI	16	0	571.288343	572.296167	[M-H]-	C25H49O12P	153	126	90.2	78.6	142.4	236	127.6	80.2	135	14.78	792	252	108.6	113.8	123.2	C03819	-	LMGP06050002	42607493	-	-	-	ko00564
LIPID-N-0185	LPI(22:6)	GP	LPI	22	6	643.288343	644.296167	[M-H]-	C31H49O12P	8.68	0.704	0.982	N/A	0.65	1.178	1.23	1.536	3	N/A	N/A	3.36	1.608	1.944	1.8	C03819	-	LMGP06050012	52928607	-	-	-	ko00564
LIPID-N-0176	LPI(18:0)	GP	LPI	18	0	599.319643	600.327467	[M-H]-	C27H53O12P	1714	1122	1382	1224	2500	2980	1214	882	1802	161.4	5260	3020	1456	1278	1264	C03819	HMDB0061696	LMGP06050004	71581135	327620-46-2	-	-	ko00564
LIPID-N-0201	LPS(22:6)	GP	LPS	22	6	568.267546	569.275371	[M-H]-	C28H44NO9P	65.6	14.04	36.8	30.8	37.2	44.4	30.6	23.2	55.2	15.74	137	63.4	30	28.8	32.4	C18125	-	LMGP03050013	52926281	-	-	-	ko00564
LIPID-N-0198	LPS(20:4)	GP	LPS	20	4	544.267546	545.275371	[M-H]-	C26H44NO9P	109.8	26	65.8	63	82.2	81.8	60.8	47.4	62.2	17.2	33	58.4	51	51.8	59	C18125	-	LMGP03050007	42607475	-	-	-	ko00564
LIPID-N-0192	LPS(18:1)	GP	LPS	18	1	522.283196	523.291021	[M-H]-	C24H46NO9P	12.2	4.1	5.7	5.66	8.68	6.26	3.66	5.4	7.46	1.384	42.4	11.56	5.06	6	5.84	C18125	HMDB0240603	LMGP03050001	9547099	89319-60-8	9547099	-	ko00564
LIPID-N-0187	LPS(18:0)	GP	LPS	18	0	524.298846	525.306671	[M-H]-	C24H48NO9P	62.8	36.6	61.4	74.6	68.4	57.6	60.2	38	68	12.3	41.8	61.2	53.2	50	56.2	C18125	HMDB0240606	LMGP03050006	42607474	119786-67-3	42607474	-	ko00564
LIPID-P-0282	MG(18:1)	GL	MG	18	1	374.336401	356.29266	[M+NH4]+	C21H40O4	107	18.7	53	37.85	26.6	24.4	21.9	120.5	73.5	34.15	107.5	101.5	48.3	68.5	55	C01885	HMDB0011566	LMGL01010004	53480977	-	-	-	ko00561,ko01100,ko04714,ko04923,ko04975,ko04977
LIPID-P-0276	MG(18:0)	GL	MG	18	0	376.352051	358.30831	[M+NH4]+	C21H42O4	2290	3240	2100	2770	3740	2820	2680	2835	3850	2535	4500	2560	3635	3820	3555	C01885	HMDB0011131	LMGL01010003	15560610	22610-61-3	-	-	ko00561,ko01100,ko04714,ko04923,ko04975,ko04977
LIPID-P-0274	MG(16:0)	GL	MG	16	0	348.320751	330.27701	[M+NH4]+	C19H38O4	3115	4035	2670	4710	2735	2905	2630	3910	3055	3170	4410	2815	2665	3615	4790	C01885	HMDB0011564	LMGL01010001	3084463	32899-41-5	-	-	ko00561,ko01100,ko04714,ko04923,ko04975,ko04977
LIPID-P-1762	MGDG(16:0_20:5)	GL	MGDG	36	5	794.578224	776.54385	[M+NH4]+	C45H76O10	1204	95	93.2	127.8	71.8	84.6	64.2	444	183.8	70.6	418	151	238	148.8	157	C03692	-	-	-	-	-	-	ko00561,ko01100
LIPID-P-1782	MGDG(20:4_20:4)	GL	MGDG	40	8	844.593874	826.5595	[M+NH4]+	C49H78O10	466	6.51	21.2	34.2	76.9	56.3	46.5	82.9	39.7	34	245	114	61.5	92.3	105	C03692	-	-	-	-	-	-	ko00561,ko01100
LIPID-P-1775	MGDG(18:1_20:5)	GL	MGDG	38	6	820.593874	802.5595	[M+NH4]+	C47H78O10	36000	4920	3520	6020	3160	4880	4340	14680	5380	4800	15360	4440	7400	11000	13180	C03692	-	-	-	-	-	-	ko00561,ko01100
LIPID-N-0650	PA(18:1_22:6)	GP	PA	40	7	745.480832	746.488657	[M-H]-	C43H71O8P	1010	719	704	643	912	2850	750	694	820	261	4390	1570	736	1350	1010	C00416	-	LMGP10010040	-	-	460605	-	ko00561,ko00564,ko01100,ko04024,ko04070,ko04072,ko04666,ko04912,ko04975,ko05200,ko05212,ko05231
LIPID-N-0647	PA(18:0_22:6)	GP	PA	40	6	747.496482	748.504307	[M-H]-	C43H73O8P	271	48.6	139	156	268	673	112	82.4	126	77.9	1510	354	118	181	191	C00416	-	LMGP10010039	138259995	-	460605	-	ko00561,ko00564,ko01100,ko04024,ko04070,ko04072,ko04666,ko04912,ko04975,ko05200,ko05212,ko05231
LIPID-N-1512	PA(20:3_22:5)	GP	PA	42	8	771.4964863	772.5043063	[M-H]-	C45H73O8P	320	25	13.9	79.4	40.6	136	24.3	310	74.9	134	207	39.1	75.7	120	91.6	C00416	-	-	-	-	-	-	ko00561,ko00564,ko01100,ko04024,ko04070,ko04072,ko04666,ko04912,ko04975,ko05200,ko05212,ko05231
LIPID-N-0643	PA(16:1_22:4)	GP	PA	38	5	721.480832	722.488657	[M-H]-	C41H71O8P	55.8	41.6	37.4	35.2	59.7	201	52.7	71.5	53.8	176	537	73	36	40.1	39	C00416	-	LMGP10010223	138126825	-	460605	-	ko00561,ko00564,ko01100,ko04024,ko04070,ko04072,ko04666,ko04912,ko04975,ko05200,ko05212,ko05231
LIPID-N-0641	PA(20:4_16:1)	GP	PA	36	5	693.449532	694.457357	[M-H]-	C39H67O8P	20.8	12.9	11.1	11.9	30.1	29.6	7.88	N/A	17.5	N/A	268	21.3	25.4	20.7	16.5	C00416	-	LMGP10010624	-	-	460605	-	ko00561,ko00564,ko01100,ko04024,ko04070,ko04072,ko04666,ko04912,ko04975,ko05200,ko05212,ko05231
LIPID-N-0640	PA(18:0_20:4)	GP	PA	38	4	723.496482	724.504307	[M-H]-	C41H73O8P	49.9	153	201	300	712	247	285	143	245	48.2	293	121	300	338	274	C00416	-	LMGP10010024	-	-	460605	-	ko00561,ko00564,ko01100,ko04024,ko04070,ko04072,ko04666,ko04912,ko04975,ko05200,ko05212,ko05231
LIPID-N-0635	PA(18:1_18:1)	GP	PA	36	2	699.496482	700.504307	[M-H]-	C39H73O8P	600	440.5	595	630	660	1450	545	459	560	695	3600	479.5	364	610	650	C00416	HMDB0007865	LMGP10010962	14057128	14268-17-8	446066	-	ko00561,ko00564,ko01100,ko04024,ko04070,ko04072,ko04666,ko04912,ko04975,ko05200,ko05212,ko05231
LIPID-N-0634	PA(16:1_18:1)	GP	PA	34	2	671.465182	672.473007	[M-H]-	C37H69O8P	25.2	19.8	34.1	34.9	26.1	43.6	33	37.6	33.2	18.4	237	35.9	20.1	32.8	31.4	C00416	-	LMGP10010903	52929493	-	-	-	ko00561,ko00564,ko01100,ko04024,ko04070,ko04072,ko04666,ko04912,ko04975,ko05200,ko05212,ko05231
LIPID-N-0639	PA(18:2_18:2)	GP	PA	36	4	695.465182	696.473007	[M-H]-	C39H69O8P	30.6	33.05	62	48.35	85.5	168	56.5	20.65	40.9	N/A	710	41.25	23.75	40.7	32.7	C00416	-	LMGP10010957	6437796	-	460605	-	ko00561,ko00564,ko01100,ko04024,ko04070,ko04072,ko04666,ko04912,ko04975,ko05200,ko05212,ko05231
LIPID-N-0690	PA(16:0_20:4)	GP	PA	36	4	695.465182	696.473007	[M-H]-	C39H69O8P	N/A	19.2	32.2	23.5	44	33	22.2	17.1	8.09	14.6	N/A	9.87	12.8	17	23	C00416	-	LMGP10010025	9547168	-	-	-	ko00561,ko00564,ko01100,ko04024,ko04070,ko04072,ko04666,ko04912,ko04975,ko05200,ko05212,ko05231
LIPID-N-0692	PA(18:1_18:2)	GP	PA	36	3	697.480832	698.488657	[M-H]-	C39H71O8P	120	65.6	91.2	97.2	95.1	334	92.3	29.3	40.3	462	1450	118	61.3	99.3	94.9	C00416	-	LMGP10010961	52929548	-	-	-	ko00561,ko00564,ko01100,ko04024,ko04070,ko04072,ko04666,ko04912,ko04975,ko05200,ko05212,ko05231
LIPID-N-1510	PA(18:2_22:5)	GP	PA	40	7	745.4808362	746.4886562	[M-H]-	C43H71O8P	2190	79.9	147	176	254	658	115	441	190	403	5950	420	387	612	561	C00416	-	-	-	-	-	-	ko00561,ko00564,ko01100,ko04024,ko04070,ko04072,ko04666,ko04912,ko04975,ko05200,ko05212,ko05231
LIPID-N-1509	PA(22:0_22:6)	GP	PA	44	6	803.5590866	804.5669066	[M-H]-	C47H81O8P	109	25.1	40.3	62	88.2	205	67.9	28.4	61.8	34.8	1210	96.1	55.4	68.4	77.6	C00416	HMDB0115419	LMGP10010841	52929434	-	-	-	ko00561,ko00564,ko01100,ko04024,ko04070,ko04072,ko04666,ko04912,ko04975,ko05200,ko05212,ko05231
LIPID-N-1501	PA(18:1_20:5)	GP	PA	38	6	719.4651862	720.4730062	[M-H]-	C41H69O8P	136	61.6	92.7	166	121	447	129	73.3	102	46.5	423	143	94.3	173	136	C00416	HMDB0115204	LMGP10010856	52929449	-	-	-	ko00561,ko00564,ko01100,ko04024,ko04070,ko04072,ko04666,ko04912,ko04975,ko05200,ko05212,ko05231
LIPID-N-1497	PA(22:1_20:4)	GP	PA	42	5	777.5434365	778.5512565	[M-H]-	C45H79O8P	15.4	6.49	12.9	15.9	33.3	51.7	11.6	6.32	14.3	N/A	98.8	26	15.8	25.1	21.7	C00416	-	LMGP10010643	52929236	-	-	-	ko00561,ko00564,ko01100,ko04024,ko04070,ko04072,ko04666,ko04912,ko04975,ko05200,ko05212,ko05231
LIPID-N-1495	PA(20:2_20:3)	GP	PA	40	5	749.5121364	750.5199564	[M-H]-	C43H75O8P	80	50.6	21.1	68	58.7	117	50.7	46.9	34.9	72.1	234	44.2	24	41.1	41	C00416	HMDB0115547	LMGP10010578	52929171	-	-	-	ko00561,ko00564,ko01100,ko04024,ko04070,ko04072,ko04666,ko04912,ko04975,ko05200,ko05212,ko05231
LIPID-N-1494	PA(20:1_20:4)	GP	PA	40	5	749.5121364	750.5199564	[M-H]-	C43H75O8P	830	222	528	469	1180	2250	459	252	496	203	5600	1300	556	697	797	C00416	HMDB0115106	LMGP10010548	52929141	-	-	-	ko00561,ko00564,ko01100,ko04024,ko04070,ko04072,ko04666,ko04912,ko04975,ko05200,ko05212,ko05231
LIPID-N-1492	PA(16:0_22:5)	GP	PA	38	5	721.4808362	722.4886562	[M-H]-	C41H71O8P	716	42.7	94.8	86.5	157	667	125	253	126	382	2230	370	130	220	191	C00416	-	-	-	-	-	-	ko00561,ko00564,ko01100,ko04024,ko04070,ko04072,ko04666,ko04912,ko04975,ko05200,ko05212,ko05231
LIPID-N-1513	PA(20:4_22:5)	GP	PA	42	9	769.4808362	770.4886562	[M-H]-	C45H71O8P	1710	128	213	194	267	762	193	534	378	271	3280	634	405	660	610	C00416	-	-	-	-	-	-	ko00561,ko00564,ko01100,ko04024,ko04070,ko04072,ko04666,ko04912,ko04975,ko05200,ko05212,ko05231
LIPID-N-1487	PA(20:1_20:3)	GP	PA	40	4	751.5277864	752.5356064	[M-H]-	C43H77O8P	286	152	203	496	453	1230	222	197	302	115	1530	439	284	443	364	C00416	HMDB0115573	LMGP10010607	52929200	-	-	-	ko00561,ko00564,ko01100,ko04024,ko04070,ko04072,ko04666,ko04912,ko04975,ko05200,ko05212,ko05231
LIPID-N-1483	PA(19:0_20:4)	GP	PA	39	4	737.5121364	738.5199564	[M-H]-	C42H75O8P	127	68.4	129	156	337	507	112	62.2	94.1	39.9	818	141	117	182	166	C00416	-	LMGP10010470	52929063	-	-	-	ko00561,ko00564,ko01100,ko04024,ko04070,ko04072,ko04666,ko04912,ko04975,ko05200,ko05212,ko05231
LIPID-N-1472	PA(20:1_18:2)	GP	PA	38	3	725.5121364	726.5199564	[M-H]-	C41H75O8P	73.3	49.5	84.3	166	147	454	128	49.6	116	209	88.7	99.1	42.7	74.8	65.2	C00416	HMDB0114959	LMGP10010355	52928948	-	-	-	ko00561,ko00564,ko01100,ko04024,ko04070,ko04072,ko04666,ko04912,ko04975,ko05200,ko05212,ko05231
LIPID-N-1470	PA(18:0_20:3)	GP	PA	38	3	725.5121364	726.5199564	[M-H]-	C41H75O8P	139	45.4	99.5	209	235	346	65.6	85	81.9	80.5	817	153	96.7	152	151	C00416	HMDB0115566	LMGP10010598	52929191	-	-	-	ko00561,ko00564,ko01100,ko04024,ko04070,ko04072,ko04666,ko04912,ko04975,ko05200,ko05212,ko05231
LIPID-N-1464	PA(18:1_20:1)	GP	PA	38	2	727.5277864	728.5356064	[M-H]-	C41H77O8P	84.8	37.5	59.7	80.6	125	202	16.5	65.5	54.3	28.3	827	122	58.4	101	94.6	C00416	HMDB0115098	LMGP10010538	52929131	-	-	-	ko00561,ko00564,ko01100,ko04024,ko04070,ko04072,ko04666,ko04912,ko04975,ko05200,ko05212,ko05231
LIPID-N-1457	PA(20:0_18:1)	GP	PA	38	1	729.5434365	730.5512565	[M-H]-	C41H79O8P	303	97.2	255	216	126	431	337	205	185	94.9	553	147	151	256	221	C00416	HMDB0115069	LMGP10010953	52929541	-	-	-	ko00561,ko00564,ko01100,ko04024,ko04070,ko04072,ko04666,ko04912,ko04975,ko05200,ko05212,ko05231
LIPID-N-1455	PA(16:0_20:1)	GP	PA	36	1	701.5121364	702.5199564	[M-H]-	C39H75O8P	40.4	31.5	61.3	85	91.1	145	43.2	42	32.2	13.7	683	180	61	93.8	63.1	C00416	HMDB0115094	LMGP10010532	52929125	-	-	-	ko00561,ko00564,ko01100,ko04024,ko04070,ko04072,ko04666,ko04912,ko04975,ko05200,ko05212,ko05231
LIPID-N-1484	PA(18:0_22:4)	GP	PA	40	4	751.5277864	752.5356064	[M-H]-	C43H77O8P	399	176	402	522	951	1430	373	130	327	127	3220	671	351	593	520	C00416	HMDB0115328	LMGP10010797	52929390	-	-	-	ko00561,ko00564,ko01100,ko04024,ko04070,ko04072,ko04666,ko04912,ko04975,ko05200,ko05212,ko05231
LIPID-N-1500	PA(16:1_22:5)	GP	PA	38	6	719.4651862	720.4730062	[M-H]-	C41H69O8P	1970	376	321	439	440	1260	310	918	446	653	1710	710	464	866	704	C00416	-	-	-	-	-	-	ko00561,ko00564,ko01100,ko04024,ko04070,ko04072,ko04666,ko04912,ko04975,ko05200,ko05212,ko05231
LIPID-N-0908	PC(16:0_20:2)	GP	PC	36	2	830.591111	785.5934557	[M+COOH]-	C44H84NO8P	68	80.2	84.8	94	139	138.4	48.8	60.2	89.6	18.76	149.6	131.2	132.2	75.6	88.8	C00157	HMDB0007979	LMGP01011469	52922420	-	-	-	ko00564,ko00590,ko00591,ko00592,ko01100,ko04723,ko05231
LIPID-N-0253	PC(15:0_20:3)	GP	PC	35	3	814.559811	769.562156	[M+COOH]-	C43H80NO8P	2.9	2.4	6.78	11.04	7.42	9.28	3.44	5.26	3.84	N/A	28.6	13.36	7.36	4.42	4.9	C00157	HMDB0007948	LMGP01011423	52922328	-	-	-	ko00564,ko00590,ko00591,ko00592,ko01100,ko04723,ko05231
LIPID-N-0251	PC(16:0_18:3)	GP	PC	34	3	800.544161	755.546506	[M+COOH]-	C42H78NO8P	662	392	630	854	926	1078	478	396	1004	155.4	1726	1194	662	874	666	C00157	HMDB0007974	LMGP01010598	24778699	203393-39-9	24778699	-	ko00564,ko00590,ko00591,ko00592,ko01100,ko04723,ko05231
LIPID-N-0250	PC(16:1_18:2)	GP	PC	34	3	800.544161	755.546506	[M+COOH]-	C42H78NO8P	394	552	674	628	1122	1006	440	206	662	69.6	2880	540	694	692	686	C00157	HMDB0008006	LMGP01010690	24778768	182820-31-1	24778768	-	ko00564,ko00590,ko00591,ko00592,ko01100,ko04723,ko05231
LIPID-N-0247	PC(16:1_16:2)	GP	PC	32	3	772.512861	727.515206	[M+COOH]-	C40H74NO8P	95	21	16.68	25.6	15	19.92	15.46	37.6	24.6	10.64	147.6	23.2	61.8	40.8	48.8	C00157	-	-	-	-	-	-	ko00564,ko00590,ko00591,ko00592,ko01100,ko04723,ko05231
LIPID-N-0245	PC(14:1_18:2)	GP	PC	32	3	772.512861	727.515206	[M+COOH]-	C40H74NO8P	3360	658	884	1116	1774	1318	818	1142	1178	400	9760	1534	2980	2120	2220	C00157	HMDB0007907	LMGP01011391	52922264	-	-	-	ko00564,ko00590,ko00591,ko00592,ko01100,ko04723,ko05231
LIPID-N-0241	PC(18:0_20:2)	GP	PC	38	2	858.622411	813.624756	[M+COOH]-	C46H88NO8P	74.8	114.6	163.2	352	422	288	77.8	74.8	191	30.2	204	154.6	178.2	119.6	144.2	C00157	HMDB0008045	LMGP01010788	24778847	-	24778847	-	ko00564,ko00590,ko00591,ko00592,ko01100,ko04723,ko05231
LIPID-N-0240	PC(18:2_20:0)	GP	PC	38	2	858.622411	813.624756	[M+COOH]-	C46H88NO8P	6.82	27.8	39.8	9.54	19.86	14.82	27.6	5.28	35.2	1.158	16.98	19.02	25.8	14.88	18.4	C00157	HMDB0008143	LMGP01011630	52922739	-	52922739	-	ko00564,ko00590,ko00591,ko00592,ko01100,ko04723,ko05231
LIPID-N-0239	PC(18:1_20:1)	GP	PC	38	2	858.622411	813.624756	[M+COOH]-	C46H88NO8P	91.6	278	254	163.6	198.4	153.8	169.6	95.8	280	23.4	230	171.4	242	144.8	177.8	C00157	HMDB0008077	LMGP01010843	53478733	-	53478733	-	ko00564,ko00590,ko00591,ko00592,ko01100,ko04723,ko05231
LIPID-N-0290	PC(18:1_20:4)	GP	PC	38	5	852.575461	807.577806	[M+COOH]-	C46H82NO8P	1478	1268	2580	2600	3720	2280	2020	1170	3140	422	4340	2500	2140	1344	2300	C00157	HMDB0008114	LMGP01010905	24778948	85082-03-7	24778735	-	ko00564,ko00590,ko00591,ko00592,ko01100,ko04723,ko05231
LIPID-N-0238	PC(18:1_19:1)	GP	PC	37	2	844.606761	799.609106	[M+COOH]-	C45H86NO8P	20.8	37.4	57.2	63.8	77.2	30.2	36	22.6	47.6	7.18	77.2	43.8	61.4	45	36.8	C00157	-	LMGP01011606	52922691	-	-	-	ko00564,ko00590,ko00591,ko00592,ko01100,ko04723,ko05231
LIPID-N-0236	PC(18:0_18:2)	GP	PC	36	2	830.591111	785.593456	[M+COOH]-	C44H84NO8P	1504	1360	3840	5460	8080	6440	2900	1204	3960	600	5500	5240	5580	3360	4100	C00157	HMDB0008039	LMGP01010764	6441487	27098-24-4	6441487	-	ko00564,ko00590,ko00591,ko00592,ko01100,ko04723,ko05231
LIPID-N-0234	PC(17:0_18:2)	GP	PC	35	2	816.575461	771.577806	[M+COOH]-	C43H82NO8P	64.8	51.8	72.6	143.2	206	191.6	135.8	N/A	127.8	16.72	290	270	145	87	124.6	C00157	-	LMGP01011505	52922491	-	-	-	ko00564,ko00590,ko00591,ko00592,ko01100,ko04723,ko05231
LIPID-N-0233	PC(17:1_18:1)	GP	PC	35	2	816.575461	771.577806	[M+COOH]-	C43H82NO8P	153.4	185.4	212	276	340	214	121.8	94.6	272	28.2	818	290	252	140.2	193.2	C00157	-	LMGP01011532	52922543	-	-	-	ko00564,ko00590,ko00591,ko00592,ko01100,ko04723,ko05231
LIPID-N-0232	PC(16:0_18:2)	GP	PC	34	2	802.559811	757.562156	[M+COOH]-	C42H80NO8P	11640	8260	13920	11400	20200	24800	10460	5520	16440	2680	42600	29800	13300	19220	18100	C00157	HMDB0007973	LMGP01010585	5287971	17708-90-6	5287971	-	ko00564,ko00590,ko00591,ko00592,ko01100,ko04723,ko05231
LIPID-N-0231	PC(16:1_18:1)	GP	PC	34	2	802.559811	757.562156	[M+COOH]-	C42H80NO8P	900	2080	2080	2460	2600	2200	1250	588	1812	342	8420	1794	2620	1702	1592	C00157	HMDB0008004	LMGP01010678	24778766	-	24778766	-	ko00564,ko00590,ko00591,ko00592,ko01100,ko04723,ko05231
LIPID-N-0229	PC(14:0_18:2)	GP	PC	32	2	774.528511	729.530856	[M+COOH]-	C40H76NO8P	17.24	18.52	50.6	69.4	103	130.4	44.6	15.4	69.8	12.76	362	64	77	56.6	56.6	C00157	HMDB0007874	LMGP01010494	24778624	92345-33-0	24778624	-	ko00564,ko00590,ko00591,ko00592,ko01100,ko04723,ko05231
LIPID-N-0228	PC(16:1_16:1)	GP	PC	32	2	774.528511	729.530856	[M+COOH]-	C40H76NO8P	109	265	225	191	211	162	129	94.2	172	32.4	861	169	273	152	198	C00157	HMDB0008002	LMGP01010682	24778764	-	24778764	-	ko00564,ko00590,ko00591,ko00592,ko01100,ko04723,ko05231
LIPID-N-0237	PC(19:0_18:2)	GP	PC	37	2	844.606761	799.609106	[M+COOH]-	C45H86NO8P	4.96	12.88	25	18.12	38	40.6	14.32	5.44	18.6	1.38	19.12	18.7	26.2	21.6	20.8	C00157	-	LMGP01011739	52922957	-	-	-	ko00564,ko00590,ko00591,ko00592,ko01100,ko04723,ko05231
LIPID-N-0227	PC(24:0_18:1)	GP	PC	42	1	916.700661	871.703006	[M+COOH]-	C50H98NO8P	0.48	1.028	1.696	1.678	2.66	0.812	1.05	0.716	1.99	0.244	7.82	7.38	3.52	2.06	2.48	C00157	HMDB0008283	LMGP01011026	24779051	-	24779051	-	ko00564,ko00590,ko00591,ko00592,ko01100,ko04723,ko05231
LIPID-N-0294	PC(18:2_20:3)	GP	PC	38	5	852.575461	807.577806	[M+COOH]-	C46H82NO8P	65.2	51.2	156.6	156.6	206	192	118	13.68	90.8	10.92	49.2	152.2	96.6	112.8	117.4	C00157	HMDB0008139	LMGP01011633	53478787	-	53478787	-	ko00564,ko00590,ko00591,ko00592,ko01100,ko04723,ko05231
LIPID-N-0905	PC(18:1_20:5)	GP	PC	38	6	850.559811	805.5621555	[M+COOH]-	C46H80NO8P	49.2	67.8	89.4	187.6	210	170	138.6	14.12	78.6	11.96	63.8	131	136.6	107.4	95.8	C00157	HMDB0008083	LMGP01010844	24778898	-	-	-	ko00564,ko00590,ko00591,ko00592,ko01100,ko04723,ko05231
LIPID-N-1044	PC(15:0_22:6)	GP	PC	37	6	836.5441601	791.5465055	[M+COOH]-	C45H78NO8P	43.6	65.6	50.8	40.4	65	30.4	23.4	51.6	83.2	9.46	286	65.4	108.2	91.8	65.8	C00157	HMDB0007958	LMGP01011430	52922342	253127-60-5	-	-	ko00564,ko00590,ko00591,ko00592,ko01100,ko04723,ko05231
LIPID-N-1046	PC(20:4_20:5)	GP	PC	40	9	872.5441601	827.5465055	[M+COOH]-	C48H78NO8P	9.56	24.8	37	27	82.4	24.8	21.2	8.52	30.8	9.36	37.2	25.2	25.8	38	22.4	C00157	HMDB0008445	LMGP01011919	52923315	-	-	-	ko00564,ko00590,ko00591,ko00592,ko01100,ko04723,ko05231
LIPID-N-0315	PC(18:1_22:6)	GP	PC	40	7	876.575461	831.577806	[M+COOH]-	C48H82NO8P	238	372	522	882	1262	844	512	175.4	694	95.2	1562	768	658	612	624	C00157	HMDB0008090	LMGP01010847	24778901	-	24778901	-	ko00564,ko00590,ko00591,ko00592,ko01100,ko04723,ko05231
LIPID-N-0314	PC(18:2_20:5)	GP	PC	38	7	848.544161	803.546506	[M+COOH]-	C46H78NO8P	2.38	10.74	25.6	33.6	54.6	51.4	37.2	N/A	22.2	N/A	17.88	32.4	23.2	22.8	18.14	C00157	HMDB0008149	LMGP01011634	52922747	-	52922747	-	ko00564,ko00590,ko00591,ko00592,ko01100,ko04723,ko05231
LIPID-N-0313	PC(16:1_22:6)	GP	PC	38	7	848.544161	803.546506	[M+COOH]-	C46H78NO8P	64.8	108	183.6	87.8	324	200	155.2	36	190.4	16.82	268	214	149.8	158.2	181.4	C00157	HMDB0008023	LMGP01010696	24778773	-	24778773	-	ko00564,ko00590,ko00591,ko00592,ko01100,ko04723,ko05231
LIPID-N-0312	PC(20:0_22:6)	GP	PC	42	6	906.622411	861.624756	[M+COOH]-	C50H88NO8P	1.488	7	6.76	1.322	2.72	2.76	2.92	0.992	7.24	N/A	2.76	5.72	3.38	3.9	3.92	C00157	HMDB0008734	LMGP01012115	52923707	-	52923707	-	ko00564,ko00590,ko00591,ko00592,ko01100,ko04723,ko05231
LIPID-N-0311	PC(20:2_20:4)	GP	PC	40	6	878.591111	833.593456	[M+COOH]-	C48H84NO8P	20.2	28.8	29.2	29.6	48.6	39.2	18.4	10.2	43.6	5.32	32.8	16.24	24.2	17.04	30.2	C00157	HMDB0008345	LMGP01011858	52923195	-	24778876	-	ko00564,ko00590,ko00591,ko00592,ko01100,ko04723,ko05231
LIPID-N-0292	PC(20:5_18:0)	GP	PC	38	5	852.575461	807.577806	[M+COOH]-	C46H82NO8P	30.2	29.2	56.4	144.6	149	122.6	70.8	10.56	35.4	10.52	116.8	119.8	112.8	82.6	83.2	C00157	HMDB0008497	LMGP01011937	52923351	-	52923351	-	ko00564,ko00590,ko00591,ko00592,ko01100,ko04723,ko05231
LIPID-N-0310	PC(18:1_22:5)	GP	PC	40	6	878.591111	833.593456	[M+COOH]-	C48H84NO8P	21	40.2	79	61.8	61.6	39	28.8	35.6	71	6.08	24.4	24.4	50.4	43.4	39.6	C00157	-	-	-	-	24778876	-	ko00564,ko00590,ko00591,ko00592,ko01100,ko04723,ko05231
LIPID-N-0307	PC(22:6_17:0)	GP	PC	39	6	864.575461	819.577806	[M+COOH]-	C47H82NO8P	84.2	67	78	176	202	224	86.2	64.6	185.2	15.56	252	168.4	190.6	107.6	154.8	C00157	-	LMGP01012104	52923685	-	-	-	ko00564,ko00590,ko00591,ko00592,ko01100,ko04723,ko05231
LIPID-N-0304	PC(18:2_20:4)	GP	PC	38	6	850.559811	805.562156	[M+COOH]-	C46H80NO8P	218	298	562	570	792	766	592	140.4	484	32.8	830	578	564	324	508	C00157	HMDB0008147	LMGP01010943	24778979	85082-02-6	24778979	-	ko00564,ko00590,ko00591,ko00592,ko01100,ko04723,ko05231
LIPID-N-0303	PC(16:0_22:6)	GP	PC	38	6	850.559811	805.562156	[M+COOH]-	C46H80NO8P	1438	1182	1882	2520	5060	4240	1450	768	2840	222	6800	4300	2780	2240	1898	C00157	HMDB0007991	LMGP01010650	6441886	-	6441886	-	ko00564,ko00590,ko00591,ko00592,ko01100,ko04723,ko05231
LIPID-N-0301	PC(22:5_14:1)	GP	PC	36	6	822.528511	777.530856	[M+COOH]-	C44H76NO8P	2160	178.6	350	372	382	454	234	756	786	306	1758	398	888	728	728	C00157	HMDB0008690	LMGP01012233	53479343	-	53479343	-	ko00564,ko00590,ko00591,ko00592,ko01100,ko04723,ko05231
LIPID-N-0297	PC(22:4_18:1)	GP	PC	40	5	880.606761	835.609106	[M+COOH]-	C48H86NO8P	13.58	23.4	41	28.2	50	35.6	24.2	13.12	18	2.98	108.6	38.6	44.6	30.8	36	C00157	HMDB0008629	LMGP01012078	53479251	-	53479251	-	ko00564,ko00590,ko00591,ko00592,ko01100,ko04723,ko05231
LIPID-N-0296	PC(18:0_22:5)	GP	PC	40	5	880.606761	835.609106	[M+COOH]-	C48H86NO8P	22.6	29.8	37.8	43.2	90.2	98.4	44.2	5.5	38	6.22	264	58	81.4	53.2	48.4	C00157	HMDB0008661	LMGP01010816	53479285	-	53479285	-	ko00564,ko00590,ko00591,ko00592,ko01100,ko04723,ko05231
LIPID-N-0295	PC(20:1_20:4)	GP	PC	40	5	880.606761	835.609106	[M+COOH]-	C48H86NO8P	12.06	22.4	35.8	25.2	37.4	29	25	10.52	37.4	3.86	25.6	38	45.4	26.8	33.6	C00157	HMDB0008312	LMGP01011827	52923133	-	52923133	-	ko00564,ko00590,ko00591,ko00592,ko01100,ko04723,ko05231
LIPID-N-0308	PC(18:0_22:6)	GP	PC	40	6	878.591111	833.593456	[M+COOH]-	C48H84NO8P	490	468	770	1238	1652	1830	654	306	1052	111.2	1680	1062	1330	1020	798	C00157	HMDB0008057	LMGP01010821	24778876	-	24778876	-	ko00564,ko00590,ko00591,ko00592,ko01100,ko04723,ko05231
LIPID-N-0906	PC(15:0_18:1)	GP	PC	33	1	790.559811	745.5621555	[M+COOH]-	C41H80NO8P	59.2	27.8	46.2	60.2	87.6	78.2	38	22.4	79.4	8.38	192.6	92.6	92.6	57.4	62.6	C00157	HMDB0007938	LMGP01010541	24778662	-	-	-	ko00564,ko00590,ko00591,ko00592,ko01100,ko04723,ko05231
LIPID-N-0225	PC(18:1_22:0)	GP	PC	40	1	888.669361	843.671706	[M+COOH]-	C48H94NO8P	1.102	1.584	2.5	2.22	2.78	2.06	0.906	1.102	1.998	0.284	5.94	5.92	3.32	2.26	2.84	C00157	HMDB0008531	LMGP01010839	24779108	-	24779108	-	ko00564,ko00590,ko00591,ko00592,ko01100,ko04723,ko05231
LIPID-N-0222	PC(19:0_18:1)	GP	PC	37	1	846.622411	801.624756	[M+COOH]-	C45H88NO8P	5.32	21.6	26.2	24.2	28.6	33.6	11.22	6.4	22.6	2	36.4	16.92	31.2	19.6	23	C00157	-	LMGP01011738	52922955	-	-	-	ko00564,ko00590,ko00591,ko00592,ko01100,ko04723,ko05231
LIPID-N-0276	PC(22:4_16:0)	GP	PC	38	4	854.591111	809.593456	[M+COOH]-	C46H84NO8P	78.8	66.2	102.4	61.8	169.2	140	72.8	42.2	91.2	18.56	634	111.8	172	149.4	92	C00157	HMDB0008626	LMGP01012072	52923621	-	52923621	-	ko00564,ko00590,ko00591,ko00592,ko01100,ko04723,ko05231
LIPID-N-0275	PC(18:0_20:4)	GP	PC	38	4	854.591111	809.593456	[M+COOH]-	C46H84NO8P	2280	1560	3100	4700	6380	7460	2820	1892	3900	662	7600	6340	4700	3380	3540	C00157	HMDB0008048	LMGP01010802	16219824	35418-59-8	16219824	-	ko00564,ko00590,ko00591,ko00592,ko01100,ko04723,ko05231
LIPID-N-0274	PC(20:3_18:1)	GP	PC	38	4	854.591111	809.593456	[M+COOH]-	C46H84NO8P	428	546	1036	1148	1072	730	506	264	486	50.6	896	780	754	554	732	C00157	HMDB0008401	LMGP01011878	52923233	-	52923233	-	ko00564,ko00590,ko00591,ko00592,ko01100,ko04723,ko05231
LIPID-N-0273	PC(20:4_17:0)	GP	PC	37	4	840.559811	795.577806	[M+COOH]-	C45H82NO8P	87.8	56.4	68	153.8	193.4	132	56.2	24.4	82.4	3.74	170.6	156.8	83.6	91	90	C00157	-	LMGP01011904	52923285	-	-	-	ko00564,ko00590,ko00591,ko00592,ko01100,ko04723,ko05231
LIPID-N-0272	PC(16:0_20:4)	GP	PC	36	4	826.559811	781.562156	[M+COOH]-	C44H80NO8P	5980	3740	4220	6760	10740	9460	3840	4820	9600	1182	21000	12640	9480	6880	6520	C00157	HMDB0008203	LMGP01010007	7983442	-	7983442	-	ko00564,ko00590,ko00591,ko00592,ko01100,ko04723,ko05231
LIPID-N-0271	PC(18:3_18:1)	GP	PC	36	4	826.559811	781.562156	[M+COOH]-	C44H80NO8P	56.2	63.8	99.2	160.4	133	127.6	88	38.8	98.4	19.28	104.2	127.6	126.4	79.2	114.4	C00157	HMDB0008073	LMGP01010955	53478725	-	53478725	-	ko00564,ko00590,ko00591,ko00592,ko01100,ko04723,ko05231
LIPID-N-0270	PC(18:2_18:2)	GP	PC	36	4	826.559811	781.562156	[M+COOH]-	C44H80NO8P	111	134	329	405	424	529	254	60.9	261	34	354	464	358	257	324	C00157	HMDB0008138	LMGP01010921	5288075	998-06-1	5288075	-	ko00564,ko00590,ko00591,ko00592,ko01100,ko04723,ko05231
LIPID-N-0269	PC(15:0_20:4)	GP	PC	35	4	812.544161	767.546506	[M+COOH]-	C43H78NO8P	100	45.2	105.6	91.8	143.6	167.2	91.2	32.6	173	15.04	456	134.4	132.6	92.8	129.6	C00157	HMDB0007949	LMGP01011424	52922330	-	-	-	ko00564,ko00590,ko00591,ko00592,ko01100,ko04723,ko05231
LIPID-N-0277	PC(19:0_20:4)	GP	PC	39	4	868.606761	823.609106	[M+COOH]-	C47H86NO8P	115.6	59	136.2	199.2	324	270	132.8	81.2	196.6	27.6	300	264	248	174.4	176	C00157	-	LMGP01011748	52922975	-	-	-	ko00564,ko00590,ko00591,ko00592,ko01100,ko04723,ko05231
LIPID-N-0268	PC(14:0_20:4)	GP	PC	34	4	798.528511	753.530856	[M+COOH]-	C42H76NO8P	46.6	26.8	45.2	59.8	101.6	114.2	25.4	34.2	79	9.8	358	51.6	97.4	79.2	78.6	C00157	HMDB0007883	LMGP01010506	24778634	-	24778634	-	ko00564,ko00590,ko00591,ko00592,ko01100,ko04723,ko05231
LIPID-N-0263	PC(20:0_20:3)	GP	PC	40	3	884.638061	839.640406	[M+COOH]-	C48H90NO8P	2.4	9.5	12.88	3.78	6.02	3.52	8.46	1.586	8.84	N/A	4.5	5.5	7.94	5.12	4.94	C00157	-	LMGP01011022	24779047	-	-	-	ko00564,ko00590,ko00591,ko00592,ko01100,ko04723,ko05231
LIPID-N-0260	PC(20:2_18:1)	GP	PC	38	3	856.606761	811.609106	[M+COOH]-	C46H86NO8P	54.2	117	110.8	138	202	55.8	72.8	60.8	96.4	24.8	74.6	88.2	124.8	93.8	67.8	C00157	HMDB0008335	LMGP01011847	52923173	-	52923115	-	ko00564,ko00590,ko00591,ko00592,ko01100,ko04723,ko05231
LIPID-N-0257	PC(19:1_18:2)	GP	PC	37	3	842.591111	797.593456	[M+COOH]-	C45H84NO8P	8.26	9.1	14.2	35.2	47.8	23.6	22.8	4.72	14	1.692	22.8	10.9	25.2	17.9	32.2	C00157	-	LMGP01011769	52923017	-	-	-	ko00564,ko00590,ko00591,ko00592,ko01100,ko04723,ko05231
LIPID-N-0256	PC(17:0_20:3)	GP	PC	37	3	842.591111	797.593456	[M+COOH]-	C45H84NO8P	66	85.8	89.8	141.2	169.4	151.2	90.8	65.2	102.6	25.4	240	109.2	107.6	111.4	87.8	C00157	-	LMGP01011514	52922507	-	-	-	ko00564,ko00590,ko00591,ko00592,ko01100,ko04723,ko05231
LIPID-N-0255	PC(16:0_20:3)	GP	PC	36	3	828.575461	783.577806	[M+COOH]-	C44H82NO8P	1790	1052	1708	2340	4020	3440	1826	1704	3900	368	8680	5120	3420	1946	2520	C00157	HMDB0007980	LMGP01010622	24778715	-	24778715	-	ko00564,ko00590,ko00591,ko00592,ko01100,ko04723,ko05231
LIPID-N-0254	PC(18:1_18:2)	GP	PC	36	3	828.575461	783.577806	[M+COOH]-	C44H82NO8P	1376	1982	2680	3500	5320	3280	3260	862	3100	488	4600	4200	3620	2480	2560	C00157	HMDB0008072	LMGP01010893	53478723	-	53478723	-	ko00564,ko00590,ko00591,ko00592,ko01100,ko04723,ko05231
LIPID-N-0267	PC(16:2_18:2)	GP	PC	34	4	798.528511	753.530856	[M+COOH]-	C42H76NO8P	155.4	31.8	33	38.8	45.4	34.4	31.2	52.2	51	11.98	294	36.8	113.2	78.2	74	C00157	-	LMGP01010699	24778776	-	-	-	ko00564,ko00590,ko00591,ko00592,ko01100,ko04723,ko05231
LIPID-N-0224	PC(18:1_20:0)	GP	PC	38	1	860.638061	815.640406	[M+COOH]-	C46H90NO8P	2.22	10.68	17.56	5.12	6.12	6.42	6.56	2.26	9.72	N/A	11.14	8.22	10.44	6.82	7.18	C00157	HMDB0008076	LMGP01010879	53478731	-	53478731	-	ko00564,ko00590,ko00591,ko00592,ko01100,ko04723,ko05231
LIPID-N-0202	PC(14:0_14:0)	GP	PC	28	0	722.497211	677.499556	[M+COOH]-	C36H72NO8P	2.47	2.84	2.59	6.25	3.67	6.1	3.09	1.32	4.3	1.48	10.2	4.12	5.59	3.83	3.49	C00157	HMDB0007866	LMGP01010477	5459377	18194-24-6	5459377	-	ko00564,ko00590,ko00591,ko00592,ko01100,ko04723,ko05231
LIPID-N-0221	PC(16:0_20:1)	GP	PC	36	1	832.606761	787.609106	[M+COOH]-	C44H86NO8P	43	57.6	81.6	53.8	87.4	92.8	30	44.8	101.2	9.02	187	133.8	111.2	62	81.6	C00157	HMDB0007978	LMGP01011468	52922418	-	-	-	ko00564,ko00590,ko00591,ko00592,ko01100,ko04723,ko05231
LIPID-N-0220	PC(18:0_18:1)	GP	PC	36	1	832.606761	787.609106	[M+COOH]-	C44H86NO8P	2640	3540	5740	8140	9100	7880	3720	2020	5980	1036	12100	6720	6940	5100	4840	C00157	HMDB0008037	LMGP01010750	24778815	-	24778815	-	ko00564,ko00590,ko00591,ko00592,ko01100,ko04723,ko05231
LIPID-N-0218	PC(16:0_18:1)	GP	PC	34	1	804.575461	759.577806	[M+COOH]-	C42H82NO8P	35000	35600	42600	41400	70200	64600	26800	25400	68400	8980	178000	81200	40600	56000	50800	C00157	HMDB0007972	LMGP01010005	5497103	26853-31-6	4266266	-	ko00564,ko00590,ko00591,ko00592,ko01100,ko04723,ko05231
LIPID-N-0217	PC(14:0_18:1)	GP	PC	32	1	776.544161	731.546506	[M+COOH]-	C40H78NO8P	182.6	276	342	422	460	522	284	166.2	370	190.4	950	424	354	344	304	C00157	HMDB0007872	LMGP01010490	24778618	-	24778618	-	ko00564,ko00590,ko00591,ko00592,ko01100,ko04723,ko05231
LIPID-N-0216	PC(16:0_16:1)	GP	PC	32	1	776.544161	731.546506	[M+COOH]-	C40H78NO8P	1174	2280	1900	2260	2980	2740	1514	1376	2420	318	6660	2780	2140	1616	2460	C00157	HMDB0007969	LMGP01010566	6443788	53595-24-7	6443788	-	ko00564,ko00590,ko00591,ko00592,ko01100,ko04723,ko05231
LIPID-N-0215	PC(15:0_16:1)	GP	PC	31	1	762.528511	717.530856	[M+COOH]-	C39H76NO8P	150.2	44.8	114.2	84.4	103.6	62.4	61.4	45.6	142.2	20.2	179.6	45.4	145.6	84.6	96	C00157	HMDB0007936	LMGP01010535	24778657	-	-	-	ko00564,ko00590,ko00591,ko00592,ko01100,ko04723,ko05231
LIPID-N-0214	PC(14:0_16:1)	GP	PC	30	1	748.512861	703.515206	[M+COOH]-	C38H74NO8P	13.42	9.58	25.6	36	49.4	40.4	16.78	11.1	22.2	5.18	100	20.2	32	27	31.6	C00157	HMDB0007870	LMGP01010485	24778615	-	24778615	-	ko00564,ko00590,ko00591,ko00592,ko01100,ko04723,ko05231
LIPID-N-0210	PC(18:0_18:0)	GP	PC	36	0	834.622411	789.624756	[M+COOH]-	C44H88NO8P	3.89	3.4	6.17	9.85	15.6	12	4.63	3.06	6.31	1.25	21.5	13.4	8.73	5.62	5.74	C00157	HMDB0008036	LMGP01010006	94190	-	94190	-	ko00564,ko00590,ko00591,ko00592,ko01100,ko04723,ko05231
LIPID-N-0205	PC(15:0_16:0)	GP	PC	31	0	764.544161	719.546506	[M+COOH]-	C39H78NO8P	370	606	1050	1452	2060	2240	1032	234	786	90.2	2100	2300	1720	1080	1162	C00157	HMDB0007935	LMGP01010532	24778655	-	-	-	ko00564,ko00590,ko00591,ko00592,ko01100,ko04723,ko05231
LIPID-N-0287	PC(18:2_18:3)	GP	PC	36	5	824.544161	779.546506	[M+COOH]-	C44H78NO8P	7.54	11.46	22.4	30.4	23.6	33.6	20.6	3	14.54	2.62	18.18	24	20.6	21.8	17.64	C00157	HMDB0008141	LMGP01011625	52922731	85046-19-1	52922731	-	ko00564,ko00590,ko00591,ko00592,ko01100,ko04723,ko05231
LIPID-N-0284	PC(16:0_20:5)	GP	PC	36	5	824.544161	779.546506	[M+COOH]-	C44H78NO8P	133.6	250	392	430	756	1032	412	72.6	242	54.4	996	654	458	372	336	C00157	HMDB0007984	LMGP01010633	24778723	-	-	-	ko00564,ko00590,ko00591,ko00592,ko01100,ko04723,ko05231
LIPID-N-0204	PC(18:0_12:0)	GP	PC	30	0	750.528511	705.530856	[M+COOH]-	C38H76NO8P	54	45.2	45.4	64.2	82	83	41.4	34	64	15.72	187.6	121.6	99.8	78.6	69	C00157	-	LMGP01010736	24778808	-	-	-	ko00564,ko00590,ko00591,ko00592,ko01100,ko04723,ko05231
LIPID-N-0203	PC(16:0_14:0)	GP	PC	30	0	750.528511	705.530856	[M+COOH]-	C38H76NO8P	66	27.2	65.4	95.6	149.4	111.2	43.4	35.4	90.2	20.2	460	86.8	95.2	60.2	94	C00157	HMDB0007965	LMGP01010560	24778679	-	24778679	-	ko00564,ko00590,ko00591,ko00592,ko01100,ko04723,ko05231
LIPID-N-0208	PC(16:0_18:0)	GP	PC	34	0	806.591111	761.593456	[M+COOH]-	C42H84NO8P	68.4	46.4	116.2	141.4	258	206	71.8	53.8	128.6	25.4	468	238	191.8	106.8	159	C00157	HMDB0007970	LMGP01010573	24778686	59403-51-9	24778686	-	ko00564,ko00590,ko00591,ko00592,ko01100,ko04723,ko05231
LIPID-N-0907	PC(18:0_22:1)	GP	PC	40	1	888.669361	843.671706	[M+COOH]-	C48H94NO8P	163.6	306	392	308	592	264	192	202	544	60.2	180.8	426	560	364	388	C00157	HMDB0008052	LMGP01010811	24778866	-	-	-	ko00564,ko00590,ko00591,ko00592,ko01100,ko04723,ko05231
LIPID-N-1047	PC(19:1_22:6)	GP	PC	41	7	890.5911103	845.5934557	[M+COOH]-	C49H84NO8P	9.24	16.94	32.4	57.6	75.6	51	30.6	18.52	43.8	8.12	57	32.4	34	40.4	41.2	C00157	-	LMGP01011786	52923051	-	-	-	ko00564,ko00590,ko00591,ko00592,ko01100,ko04723,ko05231
LIPID-N-0913	PC(20:4_22:5)	GP	PC	42	9	900.575461	855.5778056	[M+COOH]-	C50H82NO8P	19.9	8.96	9.06	6.44	21.6	23.8	9.16	5.94	19.34	N/A	N/A	23.2	27.4	23.6	22.2	C00157	HMDB0008450	-	53479041	-	-	-	ko00564,ko00590,ko00591,ko00592,ko01100,ko04723,ko05231
LIPID-N-1019	PC(15:1_18:1)	GP	PC	33	2	788.5441601	743.5465055	[M+COOH]-	C41H78NO8P	3.32	18.36	26.8	25.2	53.6	6.36	13.16	27.4	22.4	9.9	29.6	31.4	51	29.4	39	C00157	-	LMGP01011443	52922368	-	-	-	ko00564,ko00590,ko00591,ko00592,ko01100,ko04723,ko05231
LIPID-N-1021	PC(15:1_18:2)	GP	PC	33	3	786.52851	741.5308554	[M+COOH]-	C41H76NO8P	536	372	728	872	1448	1238	840	172.8	746	58.2	1836	1570	1138	818	834	C00157	-	LMGP01011444	52922370	-	-	-	ko00564,ko00590,ko00591,ko00592,ko01100,ko04723,ko05231
LIPID-N-1022	PC(14:1_20:1)	GP	PC	34	2	802.5598101	757.5621555	[M+COOH]-	C42H80NO8P	690	230	266	308	414	292	240	268	260	50.6	1898	340	700	422	480	C00157	HMDB0007912	LMGP01011398	52922278	-	-	-	ko00564,ko00590,ko00591,ko00592,ko01100,ko04723,ko05231
LIPID-N-1023	PC(15:1_19:1)	GP	PC	34	2	802.5598101	757.5621555	[M+COOH]-	C42H80NO8P	146.4	64.8	128.4	214	318	186.6	147.4	74	188.4	18.7	698	218	244	152.8	182.4	C00157	-	LMGP01011449	52922380	-	-	-	ko00564,ko00590,ko00591,ko00592,ko01100,ko04723,ko05231
LIPID-N-1024	PC(14:1_20:2)	GP	PC	34	3	800.5441601	755.5465055	[M+COOH]-	C42H78NO8P	1380	256	326	418	600	390	250	550	448	127.2	2520	426	1094	684	718	C00157	-	LMGP01011399	52922280	-	-	-	ko00564,ko00590,ko00591,ko00592,ko01100,ko04723,ko05231
LIPID-N-1025	PC(18:1_16:2)	GP	PC	34	3	800.5441601	755.5465055	[M+COOH]-	C42H78NO8P	1432	324	328	426	698	350	234	546	448	128	2620	472	1104	690	844	C00157	-	-	-	-	-	-	ko00564,ko00590,ko00591,ko00592,ko01100,ko04723,ko05231
LIPID-N-1027	PC(18:1_16:3)	GP	PC	34	4	798.52851	753.5308554	[M+COOH]-	C42H76NO8P	23.2	31.2	13.74	43.4	46.6	29	20.6	14.92	15.4	10.28	73.2	25.8	29.6	16.78	30.4	C00157	-	-	-	-	-	-	ko00564,ko00590,ko00591,ko00592,ko01100,ko04723,ko05231
LIPID-N-1028	PC(14:1_20:4)	GP	PC	34	5	796.5128599	751.5152053	[M+COOH]-	C42H74NO8P	940	115.6	214	179.2	316	320	182.6	292	292	104.2	4140	678	928	648	688	C00157	HMDB0007916	LMGP01011401	52922284	-	-	-	ko00564,ko00590,ko00591,ko00592,ko01100,ko04723,ko05231
LIPID-N-1031	PC(15:1_20:1)	GP	PC	35	2	816.5754602	771.5778056	[M+COOH]-	C43H82NO8P	410	456	536	422	662	404	522	222	688	49	1262	554	786	480	548	C00157	-	LMGP01011451	52922384	-	-	-	ko00564,ko00590,ko00591,ko00592,ko01100,ko04723,ko05231
LIPID-N-1016	PC(18:0_15:1)	GP	PC	33	1	790.5598101	745.5621555	[M+COOH]-	C41H80NO8P	25400	10920	21800	25000	39200	36000	16980	13320	34600	3640	97600	45400	44200	28800	31600	C00157	-	LMGP01011442	52922366	-	-	-	ko00564,ko00590,ko00591,ko00592,ko01100,ko04723,ko05231
LIPID-N-1043	PC(17:0_20:5)	GP	PC	37	5	838.5598101	793.5621555	[M+COOH]-	C45H80NO8P	7.3	11.82	14.92	20.8	26.8	36.4	22.6	4.2	17.68	3.92	58.8	29	15.06	11.92	13.78	C00157	-	LMGP01011515	52922509	-	-	-	ko00564,ko00590,ko00591,ko00592,ko01100,ko04723,ko05231
LIPID-N-1040	PC(18:1_19:2)	GP	PC	37	3	842.5911103	797.5934557	[M+COOH]-	C45H84NO8P	40.2	76.4	51	99.4	172.4	99.8	105.8	31.8	88.8	10.72	169.6	125.6	106.2	69.4	83.8	C00157	-	-	-	-	-	-	ko00564,ko00590,ko00591,ko00592,ko01100,ko04723,ko05231
LIPID-N-1039	PC(14:1_22:6)	GP	PC	36	7	820.5128599	775.5152053	[M+COOH]-	C44H74NO8P	2440	240	416	708	1164	826	610	696	916	302	3700	848	1522	1074	1176	C00157	HMDB0007925	LMGP01011408	52922298	-	-	-	ko00564,ko00590,ko00591,ko00592,ko01100,ko04723,ko05231
LIPID-N-0316	PC(20:3_20:4)	GP	PC	40	7	876.575461	831.577806	[M+COOH]-	C48H82NO8P	5.86	26.8	53	42.2	43	50	27.6	N/A	32	3.66	28.6	17.28	26.2	31.4	20.8	C00157	HMDB0008379	LMGP01011889	53478979	-	53478979	-	ko00564,ko00590,ko00591,ko00592,ko01100,ko04723,ko05231
LIPID-N-0318	PC(20:1_22:6)	GP	PC	42	7	904.606761	859.609106	[M+COOH]-	C50H86NO8P	14.92	18.48	22	16.72	30.4	13.12	26	6.76	25.4	1.77	22.8	33	20.8	15.5	21.4	C00157	HMDB0008321	LMGP01011834	52923147	-	52923147	-	ko00564,ko00590,ko00591,ko00592,ko01100,ko04723,ko05231
LIPID-N-0319	PC(20:4_20:4)	GP	PC	40	8	874.559811	829.562156	[M+COOH]-	C48H80NO8P	51.4	55.2	145.2	147.2	238	169.8	95.2	27.8	128	7.72	172.2	156.4	119	64.4	95.8	C00157	-	LMGP01011047	24779072	-	24778983	-	ko00564,ko00590,ko00591,ko00592,ko01100,ko04723,ko05231
LIPID-N-0320	PC(18:2_22:6)	GP	PC	40	8	874.559811	829.562156	[M+COOH]-	C48H80NO8P	79.2	75.4	145.6	197.8	222	246	121.8	34	113.6	10.94	194.8	252	171.4	103.8	117.2	C00157	HMDB0008156	LMGP01010947	24778983	-	24778983	-	ko00564,ko00590,ko00591,ko00592,ko01100,ko04723,ko05231
LIPID-N-1036	PC(14:1_22:4)	GP	PC	36	5	824.5441601	779.5465055	[M+COOH]-	C44H78NO8P	318	57.4	148.8	150.6	244	226	129.4	113.2	154.6	37	1318	286	370	276	320	C00157	HMDB0007922	LMGP01011407	52922296	-	-	-	ko00564,ko00590,ko00591,ko00592,ko01100,ko04723,ko05231
LIPID-N-1035	PC(16:1_20:3)	GP	PC	36	4	826.5598101	781.5621555	[M+COOH]-	C44H80NO8P	42.2	80.8	105.4	118.6	115.8	94.6	73.2	39.4	108.4	15.28	274	116.8	112.4	74.4	80	C00157	HMDB0008014	LMGP01011491	52922463	-	-	-	ko00564,ko00590,ko00591,ko00592,ko01100,ko04723,ko05231
LIPID-N-1034	PC(15:1_20:4)	GP	PC	35	5	810.52851	765.5308554	[M+COOH]-	C43H76NO8P	115.4	75	157	131.6	240	270	153.4	46.4	169.8	12.96	426	280	200	157	165.8	C00157	-	LMGP01011454	52922390	-	-	-	ko00564,ko00590,ko00591,ko00592,ko01100,ko04723,ko05231
LIPID-N-1033	PC(18:1_17:2)	GP	PC	35	3	814.5598101	769.5621555	[M+COOH]-	C43H80NO8P	51	126.2	84.4	82.4	63	56.6	69.4	84	92	176.8	107.6	50.2	69	41.6	60.4	C00157	-	LMGP01011562	52922603	-	-	-	ko00564,ko00590,ko00591,ko00592,ko01100,ko04723,ko05231
LIPID-N-1032	PC(16:1_19:2)	GP	PC	35	3	814.5598101	769.5621555	[M+COOH]-	C43H80NO8P	10.06	11.38	9.28	16.1	30.2	17.94	4.88	10.72	14.1	2.4	40.2	18.88	12.04	15.18	10.1	C00157	-	-	-	-	-	-	ko00564,ko00590,ko00591,ko00592,ko01100,ko04723,ko05231
LIPID-N-1042	PC(15:1_22:4)	GP	PC	37	5	838.5598101	793.5621555	[M+COOH]-	C45H80NO8P	N/A	4.52	8.76	13.1	17.7	N/A	3.68	7.4	13.04	1.406	N/A	8.72	17.88	13.24	9.9	C00157	-	LMGP01011460	52922402	-	-	-	ko00564,ko00590,ko00591,ko00592,ko01100,ko04723,ko05231
LIPID-N-1015	PC(17:0_16:1)	GP	PC	33	1	790.5598101	745.5621555	[M+COOH]-	C41H80NO8P	61.8	93.2	84.2	100	133.6	109.4	69	52	97.8	33.8	318	115.2	104	83.6	96.8	C00157	-	LMGP01011502	52922485	-	-	-	ko00564,ko00590,ko00591,ko00592,ko01100,ko04723,ko05231
LIPID-N-1041	PC(18:2_19:2)	GP	PC	37	4	840.5754602	795.5778056	[M+COOH]-	C45H82NO8P	13.16	14.56	33.2	47.6	56.4	48.2	21	6.24	36	0.958	20.8	51.2	27.8	23.4	18.34	C00157	-	-	-	-	-	-	ko00564,ko00590,ko00591,ko00592,ko01100,ko04723,ko05231
LIPID-N-1013	PC(16:0_17:0)	GP	PC	33	0	792.5754602	747.5778056	[M+COOH]-	C41H82NO8P	2.54	6.68	9.84	7.52	11.74	11.04	3.02	1.824	8.76	1.53	21	9.9	6.3	6.9	10.62	C00157	-	LMGP01010569	24778682	-	-	-	ko00564,ko00590,ko00591,ko00592,ko01100,ko04723,ko05231
LIPID-N-1014	PC(16:0_17:1)	GP	PC	33	1	790.5598101	745.5621555	[M+COOH]-	C41H80NO8P	3880	3620	7340	5000	7460	11740	4220	2100	7720	608	14880	10440	6180	4800	5400	C00157	-	LMGP01011527	52922533	-	-	-	ko00564,ko00590,ko00591,ko00592,ko01100,ko04723,ko05231
LIPID-N-0915	PC(16:0_16:2)	GP	PC	32	2	774.528511	729.5308554	[M+COOH]-	C40H76NO8P	18.5	21.2	18.54	19.36	19.68	17.3	11.02	13.38	26.6	9.36	106.2	21	26.6	25.6	19.26	C00157	-	-	-	-	-	-	ko00564,ko00590,ko00591,ko00592,ko01100,ko04723,ko05231
LIPID-N-0916	PC(20:4_22:6)	GP	PC	42	10	898.559811	853.5621555	[M+COOH]-	C50H80NO8P	37.8	68	62.8	116.6	126.4	352	56.2	20.6	89	N/A	27.4	328	250	150.6	181	C00157	HMDB0008452	LMGP01011925	52923327	-	-	-	ko00564,ko00590,ko00591,ko00592,ko01100,ko04723,ko05231
LIPID-N-0980	PC(10:0_18:0)	GP	PC	28	0	722.4972099	677.4995553	[M+COOH]-	C36H72NO8P	28	34.6	36.8	55	60.2	48.2	34.8	27	52.6	44.4	112.6	60.8	62	42.6	47	C00157	-	LMGP01010390	24778529	-	-	-	ko00564,ko00590,ko00591,ko00592,ko01100,ko04723,ko05231
LIPID-N-0981	PC(12:0_16:0)	GP	PC	28	0	722.4972099	677.4995553	[M+COOH]-	C36H72NO8P	52.4	14.46	N/A	18.96	17.54	29.6	10.18	37.2	20.4	14.92	66	33.6	18.18	10.76	13.82	C00157	-	LMGP01010435	24778570	-	-	-	ko00564,ko00590,ko00591,ko00592,ko01100,ko04723,ko05231
LIPID-N-0982	PC(12:0_16:1)	GP	PC	28	1	720.4815598	675.4839052	[M+COOH]-	C36H70NO8P	125	57.2	40.4	42	54.6	67	36	123	75.2	31.4	59.4	79	100.2	66.8	99	C00157	-	LMGP01011319	52922120	-	-	-	ko00564,ko00590,ko00591,ko00592,ko01100,ko04723,ko05231
LIPID-N-0984	PC(13:0_16:0)	GP	PC	29	0	736.5128599	691.5152053	[M+COOH]-	C37H74NO8P	162.6	346	438	668	1260	1356	650	94.2	406	74.8	986	1158	788	574	578	C00157	-	LMGP01011342	52922166	-	-	-	ko00564,ko00590,ko00591,ko00592,ko01100,ko04723,ko05231
LIPID-N-0987	PC(14:0_15:1)	GP	PC	29	1	734.4972099	689.4995553	[M+COOH]-	C37H72NO8P	27.2	19.64	29.6	42.4	75.4	57.2	32.4	12.28	37.6	9.78	154.6	45.4	55.4	49	52.2	C00157	-	LMGP01011433	52922348	-	-	-	ko00564,ko00590,ko00591,ko00592,ko01100,ko04723,ko05231
LIPID-N-0989	PC(12:0_18:1)	GP	PC	30	1	748.5128599	703.5152053	[M+COOH]-	C38H74NO8P	870	123.8	161.6	264	434	400	143.6	416	256	128	1410	530	664	506	534	C00157	-	-	-	-	-	-	ko00564,ko00590,ko00591,ko00592,ko01100,ko04723,ko05231
LIPID-N-0990	PC(15:0_15:1)	GP	PC	30	1	748.5128599	703.5152053	[M+COOH]-	C38H74NO8P	81.8	40.4	95.4	135.8	332	238	120.2	23	136.4	12.6	448	132	199	156.8	160.6	C00157	-	LMGP01011412	52922306	-	-	-	ko00564,ko00590,ko00591,ko00592,ko01100,ko04723,ko05231
LIPID-N-0993	PC(14:1_16:1)	GP	PC	30	2	746.4972099	701.4995553	[M+COOH]-	C38H72NO8P	1668	510	478	618	868	554	354	812	578	286	4440	778	1428	994	1166	C00157	-	LMGP01011385	52922252	-	-	-	ko00564,ko00590,ko00591,ko00592,ko01100,ko04723,ko05231
LIPID-N-0994	PC(13:0_18:0)	GP	PC	31	0	764.5441601	719.5465055	[M+COOH]-	C39H78NO8P	360	630	1060	1456	2380	2500	1252	208	858	131	2160	2360	1446	1188	1414	C00157	-	LMGP01011346	52922174	-	-	-	ko00564,ko00590,ko00591,ko00592,ko01100,ko04723,ko05231
LIPID-N-0986	PC(13:0_16:1)	GP	PC	29	1	734.4972099	689.4995553	[M+COOH]-	C37H72NO8P	13.24	31.2	34.4	56.2	101.4	58.2	49.6	2.82	23.6	6.92	85.4	59.4	52.4	34.8	44.4	C00157	-	LMGP01011474	52922430	-	-	-	ko00564,ko00590,ko00591,ko00592,ko01100,ko04723,ko05231
LIPID-N-0997	PC(14:0_17:1)	GP	PC	31	1	762.52851	717.5308554	[M+COOH]-	C39H76NO8P	22.2	17.04	23.4	43	57.6	71.8	22	13.36	44.2	6.82	141.8	33.4	40.6	32.6	39.6	C00157	-	LMGP01011367	52922216	-	-	-	ko00564,ko00590,ko00591,ko00592,ko01100,ko04723,ko05231
LIPID-N-1012	PC(15:0_18:0)	GP	PC	33	0	792.5754602	747.5778056	[M+COOH]-	C41H82NO8P	1628	446	1042	926	1070	734	490	1026	2320	220	2900	1040	1758	1116	1282	C00157	HMDB0007937	LMGP01010539	11787533	-	-	-	ko00564,ko00590,ko00591,ko00592,ko01100,ko04723,ko05231
LIPID-N-0996	PC(13:0_18:1)	GP	PC	31	1	762.52851	717.5308554	[M+COOH]-	C39H76NO8P	470	798	1266	1988	3580	2380	1594	228	964	136.4	1870	2040	1864	1246	1446	C00157	-	LMGP01011347	52922176	-	-	-	ko00564,ko00590,ko00591,ko00592,ko01100,ko04723,ko05231
LIPID-N-1011	PC(15:1_17:1)	GP	PC	32	2	774.52851	729.5308554	[M+COOH]-	C40H76NO8P	72.8	68	162.2	216	284	214	165.4	25.2	175.6	10.8	284	202	181.4	141.6	143	C00157	-	LMGP01011440	52922362	-	-	-	ko00564,ko00590,ko00591,ko00592,ko01100,ko04723,ko05231
LIPID-N-1010	PC(14:1_18:1)	GP	PC	32	2	774.52851	729.5308554	[M+COOH]-	C40H76NO8P	18340	6420	8520	11960	15080	11420	6800	8440	9680	3040	51400	13440	20600	14240	15540	C00157	HMDB0007906	LMGP01011390	52922262	-	-	-	ko00564,ko00590,ko00591,ko00592,ko01100,ko04723,ko05231
LIPID-N-1009	PC(10:0_22:2)	GP	PC	32	2	774.52851	729.5308554	[M+COOH]-	C40H76NO8P	9.24	1.676	N/A	N/A	4.2	3.98	1.598	4.42	3.9	N/A	3.84	N/A	8.16	8.48	6.22	C00157	-	-	-	-	-	-	ko00564,ko00590,ko00591,ko00592,ko01100,ko04723,ko05231
LIPID-N-1007	PC(17:0_15:1)	GP	PC	32	1	776.5441601	731.5465055	[M+COOH]-	C40H78NO8P	726	210	500	790	1378	1618	350	248	926	77	3600	1234	1038	666	850	C00157	-	LMGP01011439	52922360	-	-	-	ko00564,ko00590,ko00591,ko00592,ko01100,ko04723,ko05231
LIPID-N-1008	PC(18:0_14:1)	GP	PC	32	1	776.5441601	731.5465055	[M+COOH]-	C40H78NO8P	440	159.4	183.4	296	348	222	156.8	200	197.6	63.4	1202	286	458	268	318	C00157	HMDB0008032	LMGP01011582	52922643	-	-	-	ko00564,ko00590,ko00591,ko00592,ko01100,ko04723,ko05231
LIPID-N-1005	PC(12:0_20:1)	GP	PC	32	1	776.5441601	731.5465055	[M+COOH]-	C40H78NO8P	19.54	14.52	26.2	12.5	21.6	18.46	22.2	17.12	30	1.862	51.8	28	40.2	22.8	30.8	C00157	-	LMGP01011329	52922140	-	-	-	ko00564,ko00590,ko00591,ko00592,ko01100,ko04723,ko05231
LIPID-N-1003	PC(15:0_17:0)	GP	PC	32	0	778.5598101	733.5621555	[M+COOH]-	C40H80NO8P	105.8	18.84	66.6	68.6	58.6	50	27	46.2	114.6	13.28	133.4	25.2	85.2	77.6	58	C00157	-	LMGP01010537	24778659	-	-	-	ko00564,ko00590,ko00591,ko00592,ko01100,ko04723,ko05231
LIPID-N-1002	PC(10:0_22:0)	GP	PC	32	0	778.5598101	733.5621555	[M+COOH]-	C40H80NO8P	3.52	2.58	2.92	4.36	3.74	3.54	6.1	3.38	5.12	5.42	N/A	3.42	6.24	3.86	5.68	C00157	-	LMGP01010397	24778536	-	-	-	ko00564,ko00590,ko00591,ko00592,ko01100,ko04723,ko05231
LIPID-N-1000	PC(15:1_16:1)	GP	PC	31	2	760.5128599	715.5152053	[M+COOH]-	C39H74NO8P	604	524	924	1046	1856	1430	826	230	918	113.2	3100	1344	1262	978	1000	C00157	-	LMGP01011438	52922358	-	-	-	ko00564,ko00590,ko00591,ko00592,ko01100,ko04723,ko05231
LIPID-P-0549	PC(O-16:1_18:2)	GP	PC-O	34	3	742.575025	741.567241	[M+H]+	C42H80NO7P	9.72	4.6	5.22	7.62	14.78	10.72	9.5	4.22	6.22	2.72	34.4	10.74	9.62	8.74	9.78	C05212	-	LMGP01020257	53481709	-	-	-	ko00565,ko01100
LIPID-P-0545	PC(O-18:0_18:2)	GP	PC-O	36	2	772.622019	771.614191	[M+H]+	C44H86NO7P	81.4	51.2	85.2	93.6	188.2	154	49	69.4	91	7.56	574	368	140.2	149.4	157.2	C05212	HMDB0013418	LMGP01020203	6443070	-	-	-	ko00565,ko01100
LIPID-P-0548	PC(O-18:1_24:1)	GP	PC-O	42	2	856.715925	855.708091	[M+H]+	C50H98NO7P	4.56	2.66	2.44	7.18	11.86	11.36	3.06	3.2	2.38	0.7	17.62	10	4.48	6.36	7.74	C05212	-	-	-	-	-	-	ko00565,ko01100
LIPID-P-0550	PC(O-18:1_18:2)	GP	PC-O	36	3	770.606325	769.598541	[M+H]+	C44H84NO7P	13.26	8.76	19.54	14.44	29	22.8	10.46	11.72	19.7	3.38	122.6	51.2	16.86	16.2	21.6	C05212	-	LMGP01020053	16759365	155575-01-2	-	-	ko00565,ko01100
LIPID-P-0547	PC(O-18:1_22:1)	GP	PC-O	40	2	828.684625	827.676791	[M+H]+	C48H94NO7P	6.62	2.16	3.44	8.6	14.28	10.44	5.08	3.56	3.2	0.838	22.2	14.94	7.34	10.76	7.92	C05212	-	-	-	-	-	-	ko00565,ko01100
LIPID-P-0544	PC(O-16:0_18:2)	GP	PC-O	34	2	744.590719	743.582891	[M+H]+	C42H82NO7P	57.2	35.6	53.8	41.4	85	86	40.6	44	46.4	13.06	290	160.4	72.6	70	75.4	C05212	HMDB0011151	LMGP01020039	6443157	88542-95-4	-	-	ko00565,ko01100
LIPID-P-0537	PC(O-16:0_16:1)	GP	PC-O	32	1	718.575066	717.567241	[M+H]+	C40H80NO7P	6.06	3.84	7.38	7.04	13.72	11.78	4.72	5.82	5.42	0.814	41.6	22.8	8.64	10.9	11.9	C05212	HMDB0013404	LMGP01020182	52923742	-	-	-	ko00565,ko01100
LIPID-P-0541	PC(O-18:1_22:0)	GP	PC-O	40	1	830.700225	829.692441	[M+H]+	C48H96NO7P	20.4	23.8	47.6	74.8	97.6	66	27.8	18.1	43.4	4.06	98.2	45.2	40.4	41.2	50	C05212	-	LMGP01020268	53481731	-	-	-	ko00565,ko01100
LIPID-P-0540	PC(O-16:0_22:1)	GP	PC-O	38	1	802.668925	801.661141	[M+H]+	C46H92NO7P	88.2	94.4	199.8	434	860	392	171.6	69.2	183	27.2	386	248	258	250	276	C05212	-	LMGP01020190	53481727	-	-	-	ko00565,ko01100
LIPID-P-0539	PC(O-18:0_18:1)	GP	PC-O	36	1	774.637625	773.629841	[M+H]+	C44H88NO7P	3.7	4.96	8.94	13.6	30.6	11.52	6	2.36	7.9	1.212	13.12	6.8	10.52	15.32	10.22	C05212	-	LMGP01020202	53481723	-	-	-	ko00565,ko01100
LIPID-P-0538	PC(O-18:1_16:0)	GP	PC-O	34	1	746.606325	745.598541	[M+H]+	C42H84NO7P	50.2	31	57	60.4	151.8	121.8	38	41.8	56.6	6.24	318	246	84.4	101.8	114	C05212	HMDB0013426	LMGP01020152	53481719	-	-	-	ko00565,ko01100
LIPID-P-0551	PC(O-18:0_20:3)	GP	PC-O	38	3	798.637625	797.629841	[M+H]+	C46H88NO7P	23.6	13.22	23.8	28	52.6	52.4	17.08	15.04	19.34	2.22	128.6	70.2	31.8	39.8	36.6	C05212	-	LMGP01020211	52923798	-	-	-	ko00565,ko01100
LIPID-P-0535	PC(O-16:0_22:0)	GP	PC-O	38	0	804.684619	803.676791	[M+H]+	C46H94NO7P	2.34	1.148	3.62	16.2	19.72	11.38	2.34	2.14	4.14	1.412	13.38	8.22	4.66	5.32	4.52	C05212	HMDB0013408	LMGP01020060	24779329	-	-	-	ko00565,ko01100
LIPID-P-0542	PC(O-18:0_24:1)	GP	PC-O	42	1	858.731525	857.723741	[M+H]+	C50H100NO7P	2.6	0.746	1.862	3.12	6.92	4.2	0.936	1.704	1.458	0.304	7.76	5.9	2.16	3.88	3.68	C05212	-	-	53481749	-	-	-	ko00565,ko01100
LIPID-P-0552	PC(O-16:1_24:2	GP	PC-O	40	3	826.668925	825.661141	[M+H]+	C48H92NO7P	4.84	1.086	1.562	4.04	8.8	7.7	1.228	1.746	1.926	0.42	13.9	5.54	4.8	5.08	4.54	C05212	-	-	53481745	-	-	-	ko00565,ko01100
LIPID-P-0567	PC(O-22:2_20:4)	GP	PC-O	42	6	848.653325	847.645491	[M+H]+	C50H90NO7P	2.18	0.644	1.428	1.95	1.922	3.02	1.164	0.708	1.318	0.1646	5.12	1.752	1.25	2.04	2.14	C05212	-	LMGP01020244	52923864	-	-	-	ko00565,ko01100
LIPID-P-0554	PC(O-16:0_20:4)	GP	PC-O	36	4	768.590725	767.582891	[M+H]+	C44H82NO7P	438	226	418	366	720	784	432	218	336	42.6	1838	1048	478	578	538	C05212	-	LMGP01020054	53481735	-	-	-	ko00565,ko01100
LIPID-P-0531	PC(O-16:0_14:0)	GP	PC-O	30	0	692.559419	691.551591	[M+H]+	C38H78NO7P	35.6	19.76	32	49	67.6	58.6	30.8	28.8	30	9.02	180.8	101.4	48.4	47.4	49.4	C05212	-	LMGP01020178	24779275	-	-	-	ko00565,ko01100
LIPID-P-0569	PC(O-18:1_22:6)	GP	PC-O	40	7	818.606369	817.598541	[M+H]+	C48H84NO7P	131.4	53.8	80.6	86.8	157.2	212	83.8	68	91.4	13.86	660	368	136.4	139.8	133.4	C05212	-	-	-	-	-	-	ko00565,ko01100
LIPID-P-0568	PC(O-16:1_22:6)	GP	PC-O	38	7	790.575069	789.567241	[M+H]+	C46H80NO7P	26	10.52	18.36	18.6	37.4	44.4	19.56	11.12	16.8	3.1	87.6	37.4	24.2	24.6	26.2	C05212	-	-	-	-	-	-	ko00565,ko01100
LIPID-P-0566	PC(O-18:0_22:6)	GP	PC-O	40	6	820.622019	819.614191	[M+H]+	C48H86NO7P	18.6	7.04	13.04	8.44	28	13.12	8.36	11.9	14.14	1.704	39	24	11.7	12.86	12.3	C05212	HMDB0013422	LMGP01020110	24779341	-	-	-	ko00565,ko01100
LIPID-P-0565	PC(O-18:2_20:4)	GP	PC-O	38	6	792.590719	791.582891	[M+H]+	C46H82NO7P	1124	1042	1062	1052	1052	1172	1130	1086	1108	1190	1316	1356	1410	960	956	C05212	HMDB0013409	LMGP01020064	16759366	132213-85-5	-	-	ko00565,ko01100
LIPID-P-0564	PC(O-16:1_20:5)	GP	PC-O	36	6	764.559419	763.551591	[M+H]+	C44H78NO7P	2.7	1.452	1.594	2.84	5.16	4.9	2.96	1.232	1.87	1.04	11.42	4.24	3.94	3.68	3.32	C05212	-	-	-	-	-	-	ko00565,ko01100
LIPID-P-0553	PC(O-14:0_20:4)	GP	PC-O	34	4	740.559419	739.551591	[M+H]+	C42H78NO7P	5.74	2.84	5.06	5.66	11.68	12.62	5.4	2.1	4.26	0.346	17.14	10.5	7.02	6.9	7.38	C05212	-	LMGP01020021	24779283	-	-	-	ko00565,ko01100
LIPID-P-0563	PC(O-24:1_20:4)	GP	PC-O	44	5	878.700225	877.692441	[M+H]+	C52H96NO7P	7.68	2.18	2.36	9.8	20.4	13.64	3.86	3.4	2.8	1.012	24.8	9.78	8.46	7.54	8.48	C05212	-	-	53481767	-	-	-	ko00565,ko01100
LIPID-P-0560	PC(O-18:1_20:4)	GP	PC-O	38	5	794.606325	793.598541	[M+H]+	C46H84NO7P	698	350	550	466	1002	1102	552	334	488	92.4	2560	1568	672	758	752	C05212	-	LMGP01020104	24779379	-	-	-	ko00565,ko01100
LIPID-P-0559	PC(O-16:1_20:4)	GP	PC-O	36	5	766.575025	765.567241	[M+H]+	C44H80NO7P	128.4	62.4	110.8	124.8	250	250	124.4	49.4	99.8	18.92	484	199.8	140.6	152.6	151	C05212	-	LMGP01020259	53481713	-	-	-	ko00565,ko01100
LIPID-P-0558	PC(O-24:0_20:4)	GP	PC-O	44	4	880.715925	879.708091	[M+H]+	C52H98NO7P	2.62	0.478	0.694	1.53	3.1	2.64	0.58	0.662	0.62	0.208	3.46	1.114	1.64	1.244	1.388	C05212	-	LMGP01020254	53481765	-	-	-	ko00565,ko01100
LIPID-P-0557	PC(O-20:0_22:4)	GP	PC-O	42	4	852.684625	851.676791	[M+H]+	C50H94NO7P	2.32	1.368	1.47	1.24	3.02	3.72	1.404	1.3	1.772	0.1684	3.92	4.84	2.16	2.62	3.32	C05212	-	LMGP01020243	53481763	-	-	-	ko00565,ko01100
LIPID-P-0556	PC(O-20:0_20:4)	GP	PC-O	40	4	824.653325	823.645491	[M+H]+	C48H90NO7P	24.4	10.24	18.7	25	48	43.6	14.72	11.46	19.6	1.882	102.8	67.6	24.6	36.2	35.4	C05212	HMDB0013442	LMGP01020238	52923852	-	-	-	ko00565,ko01100
LIPID-P-0555	PC(O-18:0_20:4)	GP	PC-O	38	4	796.622025	795.614191	[M+H]+	C46H86NO7P	160.4	49	123.8	120	350	300	112	67.8	90	11.98	798	356	156.4	224	212	C05212	-	LMGP01020100	6443065	-	-	-	ko00565,ko01100
LIPID-P-0562	PC(O-22:1_20:4)	GP	PC-O	42	5	850.668969	849.661141	[M+H]+	C50H92NO7P	12.96	3.6	8.22	10.34	23.8	19.82	8.02	4.94	6.38	1.254	31.4	15.12	13.68	12.58	12.58	C05212	-	-	53481757	-	-	-	ko00565,ko01100
LIPID-P-0532	PC(O-16:0_16:0)	GP	PC-O	32	0	720.590719	719.582891	[M+H]+	C40H82NO7P	286	195.2	372	468	1058	784	304	238	342	47.8	2580	1394	636	646	656	C05212	-	LMGP01020029	145911	-	-	-	ko00565,ko01100
LIPID-P-0561	PC(O-20:1_20:4)	GP	PC-O	40	5	822.637669	821.629841	[M+H]+	C48H88NO7P	25.2	12.14	17.5	24.8	48.4	40.6	23.8	12.7	17.64	3.66	86	51.2	27	26.2	26.6	C05212	-	LMGP01020274	53481743	-	-	-	ko00565,ko01100
LIPID-N-0374	PE(17:0_22:3)	GP	PE	39	3	782.5675	783.577806	[M-H]-	C44H82NO8P	1	0.626	0.712	0.62	1.282	1.6	0.616	0.914	0.858	0.1694	1.822	1.32	0.862	1.044	0.852	C00350	-	-	-	-	-	-	ko00563,ko00564,ko01100,ko04136,ko04140,ko04723,ko05167
LIPID-N-1069	PE(14:0_22:3)	GP	PE	36	3	740.5230354	741.5308554	[M-H]-	C41H76NO8P	0.674	0.53	0.646	1.034	0.68	0.806	0.654	0.518	0.264	N/A	1.464	0.802	0.47	0.722	0.446	C00350	-	-	-	-	-	-	ko00563,ko00564,ko01100,ko04136,ko04140,ko04723,ko05167
LIPID-N-1068	PE(18:1_17:2)	GP	PE	35	3	726.5073853	727.5152053	[M-H]-	C40H74NO8P	0.406	2.94	1.454	1.664	1.074	0.42	1.65	0.636	0.814	0.99	5.1	0.498	0.652	0.97	0.646	C00350	-	LMGP02010602	52924303	-	-	-	ko00563,ko00564,ko01100,ko04136,ko04140,ko04723,ko05167
LIPID-N-1067	PE(15:1_20:2)	GP	PE	35	3	726.5073853	727.5152053	[M-H]-	C40H74NO8P	0.382	0.248	0.394	0.312	0.642	0.442	0.47	0.412	0.456	N/A	N/A	0.634	0.536	0.41	0.586	C00350	-	LMGP02010495	52924198	-	-	-	ko00563,ko00564,ko01100,ko04136,ko04140,ko04723,ko05167
LIPID-N-1066	PE(16:0_18:3)	GP	PE	34	3	712.4917353	713.4995553	[M-H]-	C39H72NO8P	9.86	3.52	6.86	6.92	8.3	15.92	6.16	2.7	4.98	1.502	67.6	11.18	8.04	10.6	9.5	C00350	HMDB0009121	LMGP02010685	52924386	-	-	-	ko00563,ko00564,ko01100,ko04136,ko04140,ko04723,ko05167
LIPID-N-1063	PE(17:0_18:2)	GP	PE	35	2	728.5230354	729.5308554	[M-H]-	C40H76NO8P	9.16	5.74	9.82	12.6	15.44	28.8	10.74	2.08	7.2	0.95	62	16.86	12.58	13.62	12.36	C00350	-	LMGP02010546	42627790	-	-	-	ko00563,ko00564,ko01100,ko04136,ko04140,ko04723,ko05167
LIPID-N-1061	PE(18:0_16:2)	GP	PE	34	2	714.5073853	715.5152053	[M-H]-	C39H74NO8P	2.82	2.36	2.26	3.26	2.3	3.9	2.34	2.28	2.4	0.534	30.4	4.22	2.94	3.52	2.52	C00350	-	-	-	-	-	-	ko00563,ko00564,ko01100,ko04136,ko04140,ko04723,ko05167
LIPID-N-1060	PE(14:0_20:2)	GP	PE	34	2	714.5073853	715.5152053	[M-H]-	C39H74NO8P	3.72	1.394	2.74	3.08	3.42	5.72	3.34	1.088	1.488	0.966	25.2	4.06	3.2	3.82	2.4	C00350	HMDB0008835	LMGP02010416	52924121	-	-	-	ko00563,ko00564,ko01100,ko04136,ko04140,ko04723,ko05167
LIPID-N-1057	PE(18:0_22:1)	GP	PE	40	1	800.6169358	801.6247558	[M-H]-	C45H88NO8P	0.202	0.216	0.304	0.226	0.32	0.202	0.204	0.1516	0.26	N/A	1.484	0.518	0.228	0.334	0.212	C00350	-	LMGP02010633	52924334	-	-	-	ko00563,ko00564,ko01100,ko04136,ko04140,ko04723,ko05167
LIPID-N-1056	PE(16:0_19:1)	GP	PE	35	1	730.5386855	731.5465055	[M-H]-	C40H78NO8P	0.49	0.358	N/A	0.832	0.404	0.884	0.492	0.386	0.718	N/A	3.8	0.538	0.944	1.044	0.796	C00350	-	LMGP02010509	52924212	-	-	-	ko00563,ko00564,ko01100,ko04136,ko04140,ko04723,ko05167
LIPID-N-1055	PE(16:0_17:1)	GP	PE	33	1	702.5073853	703.5152053	[M-H]-	C38H74NO8P	1.228	0.296	0.722	0.964	1.188	1.112	0.842	0.306	0.536	N/A	2.74	0.802	0.768	0.77	0.754	C00350	-	LMGP02010567	52924268	-	-	-	ko00563,ko00564,ko01100,ko04136,ko04140,ko04723,ko05167
LIPID-N-0373	PE(20:1_18:2)	GP	PE	38	3	768.554333	769.562156	[M-H]-	C43H80NO8P	12.42	21.4	24.2	15.82	37.4	27.6	22.8	8.98	18.28	2.46	39.2	19.58	19.18	23.2	23.2	C00350	HMDB0009258	LMGP02010854	52924555	-	52924555	-	ko00563,ko00564,ko01100,ko04136,ko04140,ko04723,ko05167
LIPID-N-0329	PE(16:1_14:0)	GP	PE	30	1	660.460432	661.468256	[M-H]-	C35H68NO8P	0.914	0.418	0.482	0.606	0.914	1.096	0.594	0.302	1.214	N/A	2.88	0.604	0.68	0.776	0.45	C00350	HMDB0008953	LMGP02010516	52924219	-	52924219	-	ko00563,ko00564,ko01100,ko04136,ko04140,ko04723,ko05167
LIPID-N-0430	PE(22:6_18:2)	GP	PE	40	8	786.507382	787.515206	[M-H]-	C45H74NO8P	64.4	31	51.6	57	104.2	141	72.4	18.42	51.8	6.72	167.8	122	72.8	73.8	64.2	C00350	HMDB0009687	LMGP02011144	52924845	-	52924845	-	ko00563,ko00564,ko01100,ko04136,ko04140,ko04723,ko05167
LIPID-N-0428	PE(22:6_20:1)	GP	PE	42	7	816.554333	817.562156	[M-H]-	C47H80NO8P	73.2	60.2	62.4	36.8	77.2	60.2	72.6	33.6	62.4	8.12	200	65.8	59.6	69	57.2	C00350	HMDB0009692	LMGP02011151	52924852	-	52924852	-	ko00563,ko00564,ko01100,ko04136,ko04140,ko04723,ko05167
LIPID-N-0426	PE(22:6_18:1)	GP	PE	40	7	788.523033	789.530856	[M-H]-	C45H76NO8P	1726	864	970	1250	2520	2060	1484	740	1478	304	5740	1676	1444	1246	1338	C00350	HMDB0009685	LMGP02011143	53479975	-	53479975	-	ko00563,ko00564,ko01100,ko04136,ko04140,ko04723,ko05167
LIPID-N-0425	PE(17:1_22:6)	GP	PE	39	7	774.50598	775.515206	[M-H]-	C44H74NO8P	18	12.56	18.9	25.8	36	40.2	30	5.62	19.2	3.68	48.6	28.6	18.14	26	19.76	C00350	-	LMGP02010590	52924291	-	-	-	ko00563,ko00564,ko01100,ko04136,ko04140,ko04723,ko05167
LIPID-N-0424	PE(20:5_18:2)	GP	PE	38	7	760.491732	761.499556	[M-H]-	C43H72NO8P	2.32	4.82	6.2	10.76	19.22	22.2	14.98	1.154	4.98	0.412	8.98	10.14	6.78	9.86	8.54	C00350	HMDB0009456	LMGP02010974	52924675	-	52924675	-	ko00563,ko00564,ko01100,ko04136,ko04140,ko04723,ko05167
LIPID-N-0422	PE(16:1_22:6)	GP	PE	38	7	760.491732	761.499556	[M-H]-	C43H72NO8P	78.4	56.6	84.4	78.6	171.2	170	113.4	27.8	73	12.4	348	108.6	103.2	105.4	104.2	C00350	HMDB0008979	LMGP02011216	52924914	-	52924914	-	ko00563,ko00564,ko01100,ko04136,ko04140,ko04723,ko05167
LIPID-N-0421	PE(20:4_22:2)	GP	PE	42	6	818.569983	819.577806	[M-H]-	C47H82NO8P	14.46	8.2	14.66	23.2	50.4	33.4	16.58	9	13.74	2.88	47.6	33	22.6	24.4	25.4	C00350	HMDB0009404	LMGP02010959	52924660	-	52924660	-	ko00563,ko00564,ko01100,ko04136,ko04140,ko04723,ko05167
LIPID-N-0419	PE(22:6_20:0)	GP	PE	42	6	818.569983	819.577806	[M-H]-	C47H82NO8P	4.6	5.62	7.36	1.624	3.36	4.08	5.22	1.592	6.12	0.1924	23.6	7.5	5.84	6.44	6.28	C00350	HMDB0009691	LMGP02011150	52924851	-	52924851	-	ko00563,ko00564,ko01100,ko04136,ko04140,ko04723,ko05167
LIPID-N-0418	PE(19:0_22:6)	GP	PE	41	6	804.54974	805.562156	[M-H]-	C46H80NO8P	8.36	3.56	7.06	3.52	8.4	11.9	4.56	4.12	7.5	0.49	24	8.68	6.82	8.7	8.28	C00350	-	LMGP02010792	52924493	-	-	-	ko00563,ko00564,ko01100,ko04136,ko04140,ko04723,ko05167
LIPID-N-0416	PE(18:1_22:5)	GP	PE	40	6	790.538683	791.546506	[M-H]-	C45H78NO8P	178	70.2	84.2	94.6	85	54.2	64.8	111.4	150.4	40.8	N/A	54.2	99.6	146.6	108.6	C00350	-	-	-	-	52924843	-	ko00563,ko00564,ko01100,ko04136,ko04140,ko04723,ko05167
LIPID-N-0415	PE(22:6_18:0)	GP	PE	40	6	790.538683	791.546506	[M-H]-	C45H78NO8P	3140	1120	1702	1896	3140	4160	1810	1478	2700	362	10480	3660	2800	3260	2860	C00350	HMDB0009012	LMGP02010094	9546798	-	52924843	-	ko00563,ko00564,ko01100,ko04136,ko04140,ko04723,ko05167
LIPID-N-0414	PE(17:0_22:6)	GP	PE	39	6	776.52045	777.530856	[M-H]-	C44H76NO8P	150.8	34.6	63.4	79.4	147	198.6	65.2	36.4	97.4	13.08	678	184.2	106.4	111.8	114.6	C00350	-	LMGP02011210	52924909	-	-	-	ko00563,ko00564,ko01100,ko04136,ko04140,ko04723,ko05167
LIPID-N-0413	PE(22:6_16:0)	GP	PE	38	6	762.507383	763.515206	[M-H]-	C43H74NO8P	4480	2080	2640	3400	5380	6200	3640	1778	3680	666	12940	4460	3420	4020	3980	C00350	HMDB0009682	LMGP02011161	52924862	-	52924862	-	ko00563,ko00564,ko01100,ko04136,ko04140,ko04723,ko05167
LIPID-N-0412	PE(20:5_18:1)	GP	PE	38	6	762.507383	763.515206	[M-H]-	C43H74NO8P	75.4	138.2	172	238	530	552	314	37	128	23.2	282	308	222	288	212	C00350	HMDB0009454	LMGP02011172	53479832	-	53479832	-	ko00563,ko00564,ko01100,ko04136,ko04140,ko04723,ko05167
LIPID-N-1070	PE(18:0_18:3)	GP	PE	36	3	740.5230354	741.5308554	[M-H]-	C41H76NO8P	29.4	11.6	15.1	19.82	21.4	30.8	16.54	12.18	12	6.52	212	33.8	28.2	29	22	C00350	HMDB0008995	LMGP02010628	52924329	-	-	-	ko00563,ko00564,ko01100,ko04136,ko04140,ko04723,ko05167
LIPID-N-1071	PE(18:1_19:2)	GP	PE	37	3	754.5386855	755.5465055	[M-H]-	C42H78NO8P	1.052	1.598	1.854	1.512	1.5	2.84	0.808	1.05	0.7	0.424	10.6	1.44	1.234	1.654	1.286	C00350	-	-	-	-	-	-	ko00563,ko00564,ko01100,ko04136,ko04140,ko04723,ko05167
LIPID-N-1072	PE(18:1_20:2)	GP	PE	38	3	768.5543355	769.5621555	[M-H]-	C43H80NO8P	7.18	5.3	5.2	8.44	7.96	6.14	3.3	3.76	5.56	2.82	47.2	5.74	6.5	8.64	6.48	C00350	HMDB0009066	LMGP02010647	52924348	-	-	-	ko00563,ko00564,ko01100,ko04136,ko04140,ko04723,ko05167
LIPID-N-1076	PE(15:0_20:4)	GP	PE	35	4	724.4917353	725.4995553	[M-H]-	C40H72NO8P	12.86	4.54	9.3	8.88	20.6	28.2	9.32	4	7.54	0.648	77.6	21.6	9.3	15.04	11.54	C00350	HMDB0008904	LMGP02010467	52924170	-	-	-	ko00563,ko00564,ko01100,ko04136,ko04140,ko04723,ko05167
LIPID-N-0325	PE(16:0_18:0)	GP	PE	34	0	718.538683	719.546506	[M-H]-	C39H78NO8P	7.36	4.96	6.38	9.26	19	19.44	6.46	4.6	8.72	0.488	22.4	25.4	9.84	11.9	11.6	C00350	HMDB0008925	LMGP02011225	5326793	-	5326793	-	ko00563,ko00564,ko01100,ko04136,ko04140,ko04723,ko05167
LIPID-N-0324	PE(18:0_14:0)	GP	PE	32	0	690.507383	691.515206	[M-H]-	C37H74NO8P	1.018	0.794	0.93	1.85	3.3	3.22	1.108	1.078	1.292	0.316	2.5	2.2	1.336	1.544	1.532	C00350	HMDB0005325	LMGP02011206	447790	-	447790	-	ko00563,ko00564,ko01100,ko04136,ko04140,ko04723,ko05167
LIPID-N-0323	PE(16:0_16:0)	GP	PE	32	0	690.507383	691.515206	[M-H]-	C37H74NO8P	11.4	7.36	9.49	10.9	19.7	21.9	8.07	6.47	9.34	1.5	27.3	20.9	10.1	11.3	12.7	C00350	HMDB0008923	LMGP02010037	445468	923-61-5	445468	-	ko00563,ko00564,ko01100,ko04136,ko04140,ko04723,ko05167
LIPID-N-0322	PE(16:0_14:0)	GP	PE	30	0	662.476082	663.483906	[M-H]-	C35H70NO8P	1.706	0.798	0.548	1.224	1.414	2.06	0.886	0.504	0.908	N/A	4.8	0.902	1.474	0.94	1.436	C00350	HMDB0008920	LMGP02010297	446670	-	14714258	-	ko00563,ko00564,ko01100,ko04136,ko04140,ko04723,ko05167
LIPID-N-1107	PE(20:4_22:6)	GP	PE	42	10	810.5073853	811.5152053	[M-H]-	C47H74NO8P	3.76	7.08	11.54	15.76	25.6	5.66	9.18	6.94	7.76	1.966	4.16	8.08	14.1	15.64	13.1	C00350	HMDB0009408	LMGP02010961	52924662	-	-	-	ko00563,ko00564,ko01100,ko04136,ko04140,ko04723,ko05167
LIPID-N-1105	PE(20:2_22:6)	GP	PE	42	8	814.5386855	815.5465055	[M-H]-	C47H78NO8P	23	6.88	10.28	11.78	8.66	12.7	11.26	8.72	8.1	3.94	88	14.86	8.92	12.26	9.56	C00350	HMDB0009309	LMGP02010901	52924602	-	-	-	ko00563,ko00564,ko01100,ko04136,ko04140,ko04723,ko05167
LIPID-N-1104	PE(20:4_20:4)	GP	PE	40	8	786.5073853	787.5152053	[M-H]-	C45H74NO8P	18.4	10	18.5	17.8	15.2	28.2	19.5	4.79	11.7	1.56	55.3	24.5	15.5	19.7	14.1	C00350	HMDB0009399	LMGP02011173	52924874	-	-	-	ko00563,ko00564,ko01100,ko04136,ko04140,ko04723,ko05167
LIPID-N-1103	PE(22:2_22:5)	GP	PE	44	7	844.5856357	845.5934557	[M-H]-	C49H84NO8P	0.494	0.163	0.46	0.502	0.462	0.218	0.24	0.3	0.384	0.1114	1.152	0.666	0.276	0.4	0.372	C00350	-	-	-	-	-	-	ko00563,ko00564,ko01100,ko04136,ko04140,ko04723,ko05167
LIPID-N-1102	PE(22:3_20:4)	GP	PE	42	7	816.5543355	817.5621555	[M-H]-	C47H80NO8P	17.38	6.3	10.6	7.64	6.66	12.62	11.26	5.76	7.88	5.24	90.6	20.6	7.3	9.64	7.12	C00350	-	-	-	-	-	-	ko00563,ko00564,ko01100,ko04136,ko04140,ko04723,ko05167
LIPID-N-1101	PE(20:2_22:5)	GP	PE	42	7	816.5543355	817.5621555	[M-H]-	C47H80NO8P	2.2	0.724	2.32	0.778	1.18	1.47	1.418	0.87	1.88	0.69	2.54	1.748	1.048	1.254	0.98	C00350	-	-	-	-	-	-	ko00563,ko00564,ko01100,ko04136,ko04140,ko04723,ko05167
LIPID-N-1100	PE(20:3_20:4)	GP	PE	40	7	788.5230354	789.5308554	[M-H]-	C45H76NO8P	1.294	1.756	2.38	4.12	1.148	3.28	1.572	0.742	1.59	0.476	7.4	2.58	1.468	2.2	1.852	C00350	HMDB0009366	LMGP02010925	52924626	-	-	-	ko00563,ko00564,ko01100,ko04136,ko04140,ko04723,ko05167
LIPID-N-1098	PE(18:2_22:5)	GP	PE	40	7	788.5230354	789.5308554	[M-H]-	C45H76NO8P	3.7	1.354	1.854	1.85	2.96	5.36	0.806	1.016	1.88	0.378	60.8	3.96	2.78	2.68	3.04	C00350	-	-	-	-	-	-	ko00563,ko00564,ko01100,ko04136,ko04140,ko04723,ko05167
LIPID-N-0411	PE(15:0_22:6)	GP	PE	37	6	748.49316	749.499556	[M-H]-	C42H72NO8P	14.18	6	13	12.6	44.6	65.2	17.78	3.08	12.76	2.36	71.2	16.84	16.9	20.8	20.4	C00350	HMDB0008913	LMGP02010473	52924176	-	-	-	ko00563,ko00564,ko01100,ko04136,ko04140,ko04723,ko05167
LIPID-N-1096	PE(20:2_20:4)	GP	PE	40	6	790.5386855	791.5465055	[M-H]-	C45H78NO8P	32.4	15.28	20.2	24	13.46	30.4	23	12.72	15.06	6.88	169	40.8	16.22	22.8	16.18	C00350	HMDB0009300	LMGP02010894	52924595	-	-	-	ko00563,ko00564,ko01100,ko04136,ko04140,ko04723,ko05167
LIPID-N-1092	PE(20:1_20:4)	GP	PE	40	5	792.5543355	793.5621555	[M-H]-	C45H80NO8P	23.2	26.2	32.8	18.92	25.6	26	27.2	13.02	22.2	4.08	63.2	29	25.6	29	21.2	C00350	HMDB0009267	LMGP02010863	52924564	-	-	-	ko00563,ko00564,ko01100,ko04136,ko04140,ko04723,ko05167
LIPID-N-1091	PE(19:1_20:4)	GP	PE	39	5	778.5386855	779.5465055	[M-H]-	C44H78NO8P	11.88	7.72	13.36	11.22	12.94	18.52	14.12	6.32	10.14	2.7	37.2	15.72	11.36	14.04	10.92	C00350	-	LMGP02010816	52924517	-	-	-	ko00563,ko00564,ko01100,ko04136,ko04140,ko04723,ko05167
LIPID-N-1090	PE(20:2_18:3)	GP	PE	38	5	764.5230354	765.5308554	[M-H]-	C43H76NO8P	2.28	1.868	3.16	4.84	2.42	6.16	3.96	0.796	1.736	0.526	8.66	3.5	1.882	2.42	2.02	C00350	HMDB0009132	LMGP02010700	52924401	-	-	-	ko00563,ko00564,ko01100,ko04136,ko04140,ko04723,ko05167
LIPID-N-1088	PE(16:1_22:4)	GP	PE	38	5	764.5230354	765.5308554	[M-H]-	C43H76NO8P	28.2	23	32.2	21.4	25.6	40.6	30.6	13.12	24.8	4.7	268	33.6	23	37.4	26.4	C00350	HMDB0008976	LMGP02010538	52924241	-	-	-	ko00563,ko00564,ko01100,ko04136,ko04140,ko04723,ko05167
LIPID-N-1087	PE(17:2_20:3)	GP	PE	37	5	750.5073853	751.5152053	[M-H]-	C42H74NO8P	3.24	1.78	2.54	2.5	3.76	2.32	1.574	3.24	1.694	1.05	10.8	3.8	2.62	3.04	2.34	C00350	-	LMGP02010612	52924313	-	-	-	ko00563,ko00564,ko01100,ko04136,ko04140,ko04723,ko05167
LIPID-N-1086	PE(15:1_22:4)	GP	PE	37	5	750.5073853	751.5152053	[M-H]-	C42H74NO8P	56.2	29.8	67.2	69.4	98	92.4	51.6	24	40.2	14.26	260	99.2	62.2	76.8	63	C00350	-	LMGP02010503	52924206	-	-	-	ko00563,ko00564,ko01100,ko04136,ko04140,ko04723,ko05167
LIPID-N-1085	PE(18:2_18:3)	GP	PE	36	5	736.4917353	737.4995553	[M-H]-	C41H72NO8P	N/A	0.552	1.41	1.732	1.396	2.42	1.772	N/A	0.988	N/A	1.97	1.696	1.208	1.152	1.254	C00350	HMDB0009094	LMGP02010664	52924365	-	-	-	ko00563,ko00564,ko01100,ko04136,ko04140,ko04723,ko05167
LIPID-N-1083	PE(24:0_20:4)	GP	PE	44	4	850.6325859	851.6404059	[M-H]-	C49H90NO8P	0.1638	0.076	0.089	0.115	0.0996	0.1544	0.0954	0.115	0.0636	0.0486	1.108	0.618	0.1642	0.242	0.1764	C00350	-	-	-	-	-	-	ko00563,ko00564,ko01100,ko04136,ko04140,ko04723,ko05167
LIPID-N-1081	PE(18:2_20:2)	GP	PE	38	4	766.5386855	767.5465055	[M-H]-	C43H78NO8P	2.96	2.78	3	3.82	4.62	6.34	2.96	1.004	2.6	N/A	11.98	3.78	3.94	2.66	2.48	C00350	HMDB0009099	LMGP02010671	52924372	-	-	-	ko00563,ko00564,ko01100,ko04136,ko04140,ko04723,ko05167
LIPID-N-1080	PE(15:1_22:3)	GP	PE	37	4	752.5230354	753.5308554	[M-H]-	C42H76NO8P	1.282	1.4	2.06	2.32	3.28	2.84	1.538	0.834	1.204	0.304	8.22	2.96	1.954	2.28	1.702	C00350	-	-	-	-	-	-	ko00563,ko00564,ko01100,ko04136,ko04140,ko04723,ko05167
LIPID-N-1079	PE(15:0_22:4)	GP	PE	37	4	752.5230354	753.5308554	[M-H]-	C42H76NO8P	6.32	1.846	5.38	2.92	5.22	7.24	3.06	1.708	4.32	1.516	39.2	5.74	3.78	5.22	3.9	C00350	HMDB0008910	LMGP02010472	52924175	-	-	-	ko00563,ko00564,ko01100,ko04136,ko04140,ko04723,ko05167
LIPID-N-1078	PE(18:1_18:3)	GP	PE	36	4	738.5073853	739.5152053	[M-H]-	C41H74NO8P	3	2.62	4.14	2.92	3	5.66	3.24	1.592	2.64	0.71	26.6	3.2	3.04	3.12	3.16	C00350	HMDB0009061	LMGP02010643	52924344	-	-	-	ko00563,ko00564,ko01100,ko04136,ko04140,ko04723,ko05167
LIPID-N-1077	PE(14:0_22:4)	GP	PE	36	4	738.5073853	739.5152053	[M-H]-	C41H74NO8P	5.34	1.702	2.68	2.6	3.14	6.98	3.22	1.498	2.62	1.054	20.4	4.24	2.88	3.84	3.28	C00350	HMDB0008844	LMGP02010421	52924126	-	-	-	ko00563,ko00564,ko01100,ko04136,ko04140,ko04723,ko05167
LIPID-N-1095	PE(20:1_20:5)	GP	PE	40	6	790.5386855	791.5465055	[M-H]-	C45H78NO8P	14.8	13.84	29.6	35.2	42.6	53.8	46.4	5.02	14.72	4.06	54.6	28.8	24.6	32.6	23.4	C00350	HMDB0009269	LMGP02010864	52924565	-	-	-	ko00563,ko00564,ko01100,ko04136,ko04140,ko04723,ko05167
LIPID-N-0409	PE(20:5_16:1)	GP	PE	36	6	734.476082	735.483906	[M-H]-	C41H70NO8P	2.84	5.42	5.74	7.6	16.64	15.08	10.56	1.122	3.82	0.714	12.26	10.14	6.36	8.86	8.2	C00350	HMDB0009452	LMGP02010969	52924670	-	52924670	-	ko00563,ko00564,ko01100,ko04136,ko04140,ko04723,ko05167
LIPID-N-0331	PE(16:1_16:0)	GP	PE	32	1	688.491732	689.499556	[M-H]-	C37H72NO8P	83.8	109.4	60.2	80.4	113.8	183.6	80.2	41.6	67.2	27.8	444	113	77.4	105.4	85.2	C00350	HMDB0008956	LMGP02010520	52924223	-	52924223	-	ko00563,ko00564,ko01100,ko04136,ko04140,ko04723,ko05167
LIPID-N-0404	PE(18:0_24:5)	GP	PE	42	5	820.585633	821.593456	[M-H]-	C47H84NO8P	0.488	0.292	0.348	0.42	2.42	1.772	0.55	N/A	0.398	N/A	1.052	1.304	0.77	0.808	0.708	C00350	HMDB0009593	LMGP02011122	52924823	-	52924823	-	ko00563,ko00564,ko01100,ko04136,ko04140,ko04723,ko05167
LIPID-N-0347	PE(16:1_16:1)	GP	PE	32	2	686.476082	687.483906	[M-H]-	C37H70NO8P	10.64	21.4	14.7	16.04	18.7	22.8	13.8	7.5	12.96	3.46	70	15.78	17.3	19.74	16.92	C00350	HMDB0005342	LMGP02010108	9546809	-	9546809	-	ko00563,ko00564,ko01100,ko04136,ko04140,ko04723,ko05167
LIPID-N-0348	PE(16:1_17:1)	GP	PE	33	2	700.49469	701.499556	[M-H]-	C38H72NO8P	N/A	4.26	3.66	3.96	5.28	6.08	4.44	0.982	3.74	N/A	9.32	3.5	3.56	4	3.36	C00350	-	LMGP02010522	52924225	-	-	-	ko00563,ko00564,ko01100,ko04136,ko04140,ko04723,ko05167
LIPID-N-0349	PE(18:1_16:1)	GP	PE	34	2	714.507383	715.515206	[M-H]-	C39H74NO8P	80.6	159.6	115	135	158	165.8	109	59.4	101	30	482	96.4	133	146.4	142.4	C00350	HMDB0009023	LMGP02011198	53479622	-	53479622	-	ko00563,ko00564,ko01100,ko04136,ko04140,ko04723,ko05167
LIPID-N-0350	PE(18:2_16:0)	GP	PE	34	2	714.507383	715.515206	[M-H]-	C39H74NO8P	794	658	722	886	1634	1956	900	372	752	154.8	4260	1376	1120	1194	1162	C00350	HMDB0009088	LMGP02011194	52924895	-	52924895	-	ko00563,ko00564,ko01100,ko04136,ko04140,ko04723,ko05167
LIPID-N-0351	PE(17:1_18:1)	GP	PE	35	2	728.52051	729.530856	[M-H]-	C40H76NO8P	5.72	6.36	6.54	7.84	6.78	5.8	8.6	6.96	7.16	0.804	15.36	3.94	8.24	7.46	8.22	C00350	-	LMGP02010572	52924273	-	-	-	ko00563,ko00564,ko01100,ko04136,ko04140,ko04723,ko05167
LIPID-N-0386	PE(17:0_20:4)	GP	PE	37	4	752.52448	753.530856	[M-H]-	C42H76NO8P	179.2	131.8	208	175.4	354	576	212	93.8	220	24.4	456	312	214	195	232	C00350	-	LMGP02010003	5283493	-	-	-	ko00563,ko00564,ko01100,ko04136,ko04140,ko04723,ko05167
LIPID-N-0384	PE(18:3_18:1)	GP	PE	36	4	738.507383	739.515206	[M-H]-	C41H74NO8P	19.94	24.4	22.6	36.4	49.4	58.6	27.6	10.3	22.8	4.8	88	29.2	28.4	35.4	26.6	C00350	HMDB0009124	LMGP02010691	53479673	-	53479673	-	ko00563,ko00564,ko01100,ko04136,ko04140,ko04723,ko05167
LIPID-N-0352	PE(18:1_18:1)	GP	PE	36	2	742.538683	743.546506	[M-H]-	C41H78NO8P	192	252	280	363	534	437	179	177	257	112	2990	327	423	551	555	C00350	HMDB0009025	LMGP02010039	53479624	-	53479624	-	ko00563,ko00564,ko01100,ko04136,ko04140,ko04723,ko05167
LIPID-N-0353	PE(18:0_18:2)	GP	PE	36	2	742.538683	743.546506	[M-H]-	C41H78NO8P	516	390	542	812	1428	1616	630	268	572	116.6	1984	1162	878	902	916	C00350	HMDB0008994	LMGP02010044	9546749	7266-53-7	9546749	-	ko00563,ko00564,ko01100,ko04136,ko04140,ko04723,ko05167
LIPID-N-0354	PE(20:2_16:0)	GP	PE	36	2	742.538683	743.546506	[M-H]-	C41H78NO8P	15.74	12.88	12.14	18.76	30.8	25	11.74	13.5	19.78	5.88	48	16.72	17.64	20.4	20.8	C00350	HMDB0009286	LMGP02010877	52924578	-	52924578	-	ko00563,ko00564,ko01100,ko04136,ko04140,ko04723,ko05167
LIPID-N-0355	PE(19:0_18:2)	GP	PE	37	2	756.55396	757.562156	[M-H]-	C42H80NO8P	3.24	2.3	3.34	3.08	5.68	11.26	3.68	1.436	3.2	0.374	9.46	6.02	4.88	5.64	5.1	C00350	-	LMGP02010776	52924477	-	-	-	ko00563,ko00564,ko01100,ko04136,ko04140,ko04723,ko05167
LIPID-N-0356	PE(20:2_18:0)	GP	PE	38	2	770.569983	771.577806	[M-H]-	C43H82NO8P	4.24	3.36	3.92	4.88	6.76	3.92	2.14	4.66	7.06	2.02	15.76	7.02	5.32	6.52	5.98	C00350	HMDB0009288	LMGP02010122	52924583	-	52924583	-	ko00563,ko00564,ko01100,ko04136,ko04140,ko04723,ko05167
LIPID-N-0357	PE(20:0_18:2)	GP	PE	38	2	770.569983	771.577806	[M-H]-	C43H82NO8P	1.064	2.06	2.48	0.52	1.024	1.246	2.02	0.3	1.526	0.181	4	2.1	1.532	2.16	1.938	C00350	HMDB0009225	LMGP02010125	9546825	-	9546825	-	ko00563,ko00564,ko01100,ko04136,ko04140,ko04723,ko05167
LIPID-N-0346	PE(18:2_14:0)	GP	PE	32	2	686.476082	687.483906	[M-H]-	C37H70NO8P	2.08	1.13	1.114	2.04	2.54	4.58	1.978	0.658	0.862	N/A	8.36	2.36	2.48	1.8	2.56	C00350	HMDB0008829	LMGP02010655	52924943	-	52924943	-	ko00563,ko00564,ko01100,ko04136,ko04140,ko04723,ko05167
LIPID-N-0358	PE(20:1_18:1)	GP	PE	38	2	770.569983	771.577806	[M-H]-	C43H82NO8P	25.2	37.6	36	40.6	71.6	34	29.2	34	46.4	10.36	115.2	34.2	42.6	51.6	51.4	C00350	HMDB0009256	LMGP02010853	53479718	-	53479718	-	ko00563,ko00564,ko01100,ko04136,ko04140,ko04723,ko05167
LIPID-N-0361	PE(20:1_20:1)	GP	PE	40	2	798.601283	799.609106	[M-H]-	C45H86NO8P	0.862	1.378	1.384	0.682	1.342	0.512	0.958	1.16	1.646	0.27	4.06	0.678	1.384	1.326	1.366	C00350	HMDB0009263	LMGP02011175	52924876	-	52924725	-	ko00563,ko00564,ko01100,ko04136,ko04140,ko04723,ko05167
LIPID-N-0362	PE(18:1_22:1)	GP	PE	40	2	798.601283	799.609106	[M-H]-	C45H86NO8P	1.574	2.42	2.28	1.982	4.38	2.8	1.356	2.24	2.8	0.348	5.34	3.24	2.86	2.96	2.68	C00350	-	LMGP02010650	52924725	-	52924725	-	ko00563,ko00564,ko01100,ko04136,ko04140,ko04723,ko05167
LIPID-N-0363	PE(18:1_24:1)	GP	PE	42	2	826.632583	827.640406	[M-H]-	C47H90NO8P	0.506	0.666	0.828	0.77	1.394	1.134	0.442	0.786	0.646	0.0778	3.1	2.28	1.06	1.198	1.004	C00350	HMDB0009527	-	53479865	-	53479865	-	ko00563,ko00564,ko01100,ko04136,ko04140,ko04723,ko05167
LIPID-N-0364	PE(14:0_18:3)	GP	PE	32	3	684.460432	685.468256	[M-H]-	C37H68NO8P	1.23	0.942	1.202	0.61	1.154	1.094	1.192	0.734	1.28	0.824	N/A	0.472	0.848	0.808	1.266	C00350	HMDB0008830	LMGP02010412	52924117	-	52924117	-	ko00563,ko00564,ko01100,ko04136,ko04140,ko04723,ko05167
LIPID-N-0365	PE(18:3_16:0)	GP	PE	34	3	712.491732	713.499556	[M-H]-	C39H72NO8P	30.8	18.38	19.54	31	53.4	91.2	27.4	16.08	26.6	6.14	140.8	39.4	34	37.2	37.2	C00350	HMDB0009154	LMGP02010047	9546752	-	14714008	-	ko00563,ko00564,ko01100,ko04136,ko04140,ko04723,ko05167
LIPID-N-0366	PE(16:1_18:2)	GP	PE	34	3	712.491732	713.499556	[M-H]-	C39H72NO8P	27.8	44.4	50.4	63.8	108.6	138.4	67.4	13.94	42.8	6.72	170.6	73.8	58.6	67.8	60.4	C00350	HMDB0008961	LMGP02011219	52924917	-	52924917	-	ko00563,ko00564,ko01100,ko04136,ko04140,ko04723,ko05167
LIPID-N-0367	PE(17:1_18:2)	GP	PE	35	3	726.51062	727.515206	[M-H]-	C40H74NO8P	6	6.2	8.76	7.8	14.1	17.56	9.76	2.92	6.34	1.584	21.4	8.12	8.08	8	8.36	C00350	-	LMGP02010573	52924274	-	-	-	ko00563,ko00564,ko01100,ko04136,ko04140,ko04723,ko05167
LIPID-N-0368	PE(18:1_18:2)	GP	PE	36	3	740.523033	741.530856	[M-H]-	C41H76NO8P	766	938	1164	1744	2680	2700	1214	400	1026	222	4180	1748	1328	1460	1492	C00350	HMDB0009060	LMGP02010048	9546753	1188-56-3	9546753	-	ko00563,ko00564,ko01100,ko04136,ko04140,ko04723,ko05167
LIPID-N-0369	PE(16:0_20:3)	GP	PE	36	3	740.523033	741.530856	[M-H]-	C41H76NO8P	73	90.4	77.8	179.4	183.2	174.4	56.8	89.2	100.2	31.6	268	136	121.6	125.2	118	C00350	HMDB0008935	LMGP02011222	53479587	-	53479587	-	ko00563,ko00564,ko01100,ko04136,ko04140,ko04723,ko05167
LIPID-N-0370	PE(18:2_19:1)	GP	PE	37	3	754.54095	755.546506	[M-H]-	C42H78NO8P	6.7	13.02	12.96	13.38	23.8	25.4	14.74	5.4	12.22	1.658	31.6	13.02	14.38	18.82	15.72	C00350	-	LMGP02010668	52924369	-	-	-	ko00563,ko00564,ko01100,ko04136,ko04140,ko04723,ko05167
LIPID-N-0371	PE(17:0_20:3)	GP	PE	37	3	754.54095	755.546506	[M-H]-	C42H78NO8P	6.86	4.74	6.22	6.36	26	20.8	8.12	2.06	9.08	2.46	13.52	10.82	8.5	9.44	10.18	C00350	-	LMGP02010554	52924255	-	-	-	ko00563,ko00564,ko01100,ko04136,ko04140,ko04723,ko05167
LIPID-N-0372	PE(20:3_18:0)	GP	PE	38	3	768.554333	769.562156	[M-H]-	C43H80NO8P	53.4	35	48.8	59.4	128.2	118.2	56.6	33.8	50.6	11.16	212	97.4	72.6	76.8	82.8	C00350	HMDB0009354	LMGP02010913	52924614	-	52924386	-	ko00563,ko00564,ko01100,ko04136,ko04140,ko04723,ko05167
LIPID-N-0408	PE(14:0_22:6)	GP	PE	36	6	734.476082	735.483906	[M-H]-	C41H70NO8P	5.18	1.776	2.98	3.72	10.08	10.42	4.56	1.692	4.76	0.946	32.2	4.42	5.9	6.3	6.78	C00350	HMDB0008847	LMGP02011239	52924936	-	52924936	-	ko00563,ko00564,ko01100,ko04136,ko04140,ko04723,ko05167
LIPID-N-0359	PE(22:2_18:0)	GP	PE	40	2	798.601283	799.609106	[M-H]-	C45H86NO8P	0.408	0.35	0.278	0.32	0.592	0.37	0.1936	0.506	0.47	0.1166	2	0.592	0.566	0.508	0.498	C00350	HMDB0009489	LMGP02011082	52924725	-	52924725	-	ko00563,ko00564,ko01100,ko04136,ko04140,ko04723,ko05167
LIPID-N-0344	PE(22:1_18:0)	GP	PE	40	1	800.616933	801.624756	[M-H]-	C45H88NO8P	0.204	0.286	0.342	0.296	0.512	0.402	0.204	0.1336	0.416	0.05	1.186	0.64	0.44	0.47	0.444	C00350	HMDB0009519	LMGP02011051	53479857	-	53479857	-	ko00563,ko00564,ko01100,ko04136,ko04140,ko04723,ko05167
LIPID-N-0345	PE(24:0_18:1)	GP	PE	42	1	828.648233	829.656056	[M-H]-	C47H92NO8P	0.292	0.38	0.39	0.422	0.656	0.64	0.1932	0.42	0.352	0.1114	1.412	1.454	0.632	0.83	0.714	C00350	HMDB0009719	LMGP02010294	9546993	-	9546993	-	ko00563,ko00564,ko01100,ko04136,ko04140,ko04723,ko05167
LIPID-N-0388	PE(18:1_20:3)	GP	PE	38	4	766.538683	767.546506	[M-H]-	C43H78NO8P	140.8	292	304	620	658	292	204	191.2	286	101.8	668	352	322	422	348	C00350	HMDB0009034	LMGP02010115	53479633	-	53479633	-	ko00563,ko00564,ko01100,ko04136,ko04140,ko04723,ko05167
LIPID-N-0402	PE(17:0_22:5)	GP	PE	39	5	778.5451	779.546506	[M-H]-	C44H78NO8P	33.2	6.08	9.3	10.5	8.62	8.52	6.8	12.78	22	4.82	98.4	4.4	13.06	20.4	14.04	C00350	-	-	-	-	-	-	ko00563,ko00564,ko01100,ko04136,ko04140,ko04723,ko05167
LIPID-N-0401	PE(16:0_22:5)	GP	PE	38	5	764.523033	765.530856	[M-H]-	C43H76NO8P	1026	139.4	258	260	382	376	192.6	466	702	117.8	2120	246	468	434	458	C00350	HMDB0009005	LMGP02011201	52924902	-	52924902	-	ko00563,ko00564,ko01100,ko04136,ko04140,ko04723,ko05167
LIPID-N-0400	PE(18:0_20:5)	GP	PE	38	5	764.523033	765.530856	[M-H]-	C43H76NO8P	81.4	123.8	157.6	200	364	578	228	50.6	121.6	23.2	460	404	224	250	230	C00350	HMDB0009453	LMGP02010973	52924674	-	52924902	-	ko00563,ko00564,ko01100,ko04136,ko04140,ko04723,ko05167
LIPID-N-0399	PE(18:1_20:4)	GP	PE	38	5	764.523033	765.530856	[M-H]-	C43H76NO8P	135.8	118.2	155.8	144.4	288	294	155	70.6	146.6	18.58	362	200	163.4	185.2	179.4	C00350	HMDB0009036	LMGP02011196	53479635	-	53479635	-	ko00563,ko00564,ko01100,ko04136,ko04140,ko04723,ko05167
LIPID-N-0398	PE(17:0_20:5)	GP	PE	37	5	750.50739	751.515206	[M-H]-	C42H74NO8P	3.08	2.6	4.5	6.74	12.96	13.3	9.42	1.13	4.26	0.96	15.02	8.26	6.44	6.94	7.46	C00350	-	LMGP02010555	52924256	-	-	-	ko00563,ko00564,ko01100,ko04136,ko04140,ko04723,ko05167
LIPID-N-0397	PE(16:0_20:5)	GP	PE	36	5	736.491732	737.499556	[M-H]-	C41H72NO8P	44	76	87.6	111.8	214	266	154.8	23.8	74.4	13.54	222	170.8	107.2	122.2	116.4	C00350	HMDB0008939	LMGP02011221	52924919	-	52924919	-	ko00563,ko00564,ko01100,ko04136,ko04140,ko04723,ko05167
LIPID-N-0396	PE(16:1_20:4)	GP	PE	36	5	736.491732	737.499556	[M-H]-	C41H72NO8P	183.8	181.4	216	238	582	470	292	100	193.6	33.6	614	348	250	280	266	C00350	HMDB0008970	LMGP02011217	52924915	-	52924915	-	ko00563,ko00564,ko01100,ko04136,ko04140,ko04723,ko05167
LIPID-N-0393	PE(20:4_20:0)	GP	PE	40	4	794.569983	795.577806	[M-H]-	C45H82NO8P	9.88	36.4	33.6	5.2	11.7	17.44	21	6.2	22.4	0.772	29.4	21	19.46	23.8	21.2	C00350	HMDB0009394	LMGP02010951	52924652	-	52924652	-	ko00563,ko00564,ko01100,ko04136,ko04140,ko04723,ko05167
LIPID-N-0392	PE(18:0_22:4)	GP	PE	40	4	794.569983	795.577806	[M-H]-	C45H82NO8P	79.8	50.4	83.4	90.2	230	166.4	75.2	44.8	81.8	11.7	622	166	149	170.4	156.6	C00350	HMDB0009009	LMGP02011200	52924901	-	52924901	-	ko00563,ko00564,ko01100,ko04136,ko04140,ko04723,ko05167
LIPID-N-0391	PE(19:0_20:4)	GP	PE	39	4	780.55957	781.562156	[M-H]-	C44H80NO8P	26.2	42	48.6	21.4	48	80.2	37	24	42	2.18	63.8	47.4	39.4	50	46.2	C00350	-	LMGP02010785	52924486	-	-	-	ko00563,ko00564,ko01100,ko04136,ko04140,ko04723,ko05167
LIPID-N-0390	PE(18:3_20:1)	GP	PE	38	4	766.538683	767.546506	[M-H]-	C43H78NO8P	0.844	0.498	0.77	0.766	1.078	0.854	0.56	0.348	0.496	N/A	3.4	0.532	0.808	0.68	0.532	C00350	HMDB0009131	LMGP02010699	52924400	-	52924400	-	ko00563,ko00564,ko01100,ko04136,ko04140,ko04723,ko05167
LIPID-N-0389	PE(16:0_22:4)	GP	PE	38	4	766.538683	767.546506	[M-H]-	C43H78NO8P	114.8	61.6	73.4	66.8	173	135.6	78.8	61	78.6	13.24	1718	125.4	171.4	204	204	C00350	HMDB0008943	LMGP02010116	9546817	-	9546817	-	ko00563,ko00564,ko01100,ko04136,ko04140,ko04723,ko05167
LIPID-N-0343	PE(22:0_18:1)	GP	PE	40	1	800.616933	801.624756	[M-H]-	C45H88NO8P	0.1752	0.18	0.242	0.1914	0.34	0.294	0.1602	0.246	0.1664	0.0656	0.58	0.562	0.226	0.346	0.358	C00350	HMDB0009487	LMGP02010153	9546853	-	9546853	-	ko00563,ko00564,ko01100,ko04136,ko04140,ko04723,ko05167
LIPID-N-0403	PE(18:0_22:5)	GP	PE	40	5	792.554333	793.562156	[M-H]-	C45H80NO8P	44	27.4	38.2	48	121.4	100.4	51.8	20.4	33.4	8.76	892	89	110.6	127.8	105.2	C00350	HMDB0009586	-	53479897	-	53479897	-	ko00563,ko00564,ko01100,ko04136,ko04140,ko04723,ko05167
LIPID-N-0387	PE(20:4_18:0)	GP	PE	38	4	766.538683	767.546506	[M-H]-	C43H78NO8P	5580	5660	6740	6540	10620	15140	7020	4040	7180	1016	12620	11520	7920	9620	8600	C00350	HMDB0009387	LMGP02010943	52924644	-	52924644	-	ko00563,ko00564,ko01100,ko04136,ko04140,ko04723,ko05167
LIPID-N-0380	PE(20:4_14:0)	GP	PE	34	4	710.476082	711.483906	[M-H]-	C39H70NO8P	8.8	4.5	5.44	5.5	9.32	13.52	6.02	2.98	5.32	1.188	22.2	7.78	6.1	7.34	6.76	C00350	HMDB0009382	LMGP02010935	52924636	-	52924636	-	ko00563,ko00564,ko01100,ko04136,ko04140,ko04723,ko05167
LIPID-N-0332	PE(14:0_18:1)	GP	PE	32	1	688.491732	689.499556	[M-H]-	C37H72NO8P	2.02	1.812	1.848	2.54	2.32	3.22	1.5	1.032	2.22	1.084	14.9	1.832	1.386	1.938	1.428	C00350	HMDB0008827	LMGP02011247	53479551	-	53479551	-	ko00563,ko00564,ko01100,ko04136,ko04140,ko04723,ko05167
LIPID-N-0381	PE(18:3_16:1)	GP	PE	34	4	710.476082	711.483906	[M-H]-	C39H70NO8P	1.282	2.56	1.768	2.78	2.22	4.64	2.14	0.746	1.862	0.31	7.04	1.868	2.06	2.16	2.46	C00350	HMDB0009122	LMGP02010686	52924387	-	123061932	-	ko00563,ko00564,ko01100,ko04136,ko04140,ko04723,ko05167
LIPID-N-0382	PE(18:2_18:2)	GP	PE	36	4	738.507383	739.515206	[M-H]-	C41H74NO8P	22.7	29.2	40.2	52.6	107	142	52.8	9.29	32.7	4.54	95.9	58.8	44.5	59.2	48.4	C00350	HMDB0005350	LMGP02010111	9546812	20707-71-5	9546812	-	ko00563,ko00564,ko01100,ko04136,ko04140,ko04723,ko05167
LIPID-N-0383	PE(16:0_20:4)	GP	PE	36	4	738.507383	739.515206	[M-H]-	C41H74NO8P	3540	2620	2700	3060	4880	6380	3560	1780	3180	650	10160	4900	3480	3700	4020	C00350	HMDB0008937	LMGP02010096	9546800	70812-59-8	9546800	-	ko00563,ko00564,ko01100,ko04136,ko04140,ko04723,ko05167
LIPID-N-0333	PE(15:0_18:1)	GP	PE	33	1	702.50867	703.515206	[M-H]-	C38H74NO8P	2.42	2.74	3.1	2.56	3.12	5.9	1.388	1.182	2.64	0.454	7.18	4.42	4.66	3.4	2.82	C00350	-	LMGP02010543	52924245	-	-	-	ko00563,ko00564,ko01100,ko04136,ko04140,ko04723,ko05167
LIPID-N-0334	PE(16:0_18:1)	GP	PE	34	1	716.523033	717.530856	[M-H]-	C39H76NO8P	560	558	498	674	1204	1200	496	444	630	179	5960	800	1104	1136	1176	C00350	HMDB0005320	LMGP02010009	5283496	-	5283496	-	ko00563,ko00564,ko01100,ko04136,ko04140,ko04723,ko05167
LIPID-N-0335	PE(16:1_18:0)	GP	PE	34	1	716.523033	717.530856	[M-H]-	C39H76NO8P	15.82	28	23.2	27.6	42.4	46.2	23.8	11.68	18.86	4.34	52.4	38.2	28.8	29	29.8	C00350	HMDB0008958	LMGP02010524	52924227	-	52924227	-	ko00563,ko00564,ko01100,ko04136,ko04140,ko04723,ko05167
LIPID-N-0336	PE(17:0_18:1)	GP	PE	35	1	730.53998	731.546506	[M-H]-	C40H78NO8P	10.74	10.24	10.1	14.2	23	30	8.2	7.46	11.14	2.54	151.2	18.64	21.8	23.8	22.6	C00350	-	LMGP02011211	52924910	-	-	-	ko00563,ko00564,ko01100,ko04136,ko04140,ko04723,ko05167
LIPID-N-0337	PE(20:1_16:0)	GP	PE	36	1	744.554333	745.562156	[M-H]-	C41H80NO8P	13.3	11.1	12.32	17.26	34.6	20.2	10.82	11.12	18.14	3.4	38.8	16.38	16.74	21.2	20	C00350	HMDB0009250	LMGP02010847	52924544	-	52924544	-	ko00563,ko00564,ko01100,ko04136,ko04140,ko04723,ko05167
LIPID-N-0338	PE(18:1_18:0)	GP	PE	36	1	744.554333	745.562156	[M-H]-	C41H80NO8P	102	107	116	193	282	269	102	95.4	147	30.1	1470	293	238	292	284	C00350	HMDB0009057	LMGP02010050	9546755	-	14714011	-	ko00563,ko00564,ko01100,ko04136,ko04140,ko04723,ko05167
LIPID-N-0339	PE(20:1_18:0)	GP	PE	38	1	772.585633	773.593456	[M-H]-	C43H84NO8P	9.82	8.32	10.24	15.56	28.6	13.78	7.82	10.74	17.7	3.54	28	16.7	14.96	15.16	17	C00350	HMDB0009255	LMGP02010852	52924553	-	9546835	-	ko00563,ko00564,ko01100,ko04136,ko04140,ko04723,ko05167
LIPID-N-0340	PE(20:0_18:1)	GP	PE	38	1	772.585633	773.593456	[M-H]-	C43H84NO8P	0.58	1.842	1.788	0.986	1.038	1.192	1.138	0.93	1.622	N/A	9.26	2.5	1.968	2.72	1.934	C00350	HMDB0009224	LMGP02010135	9546835	-	9546835	-	ko00563,ko00564,ko01100,ko04136,ko04140,ko04723,ko05167
LIPID-N-0375	PE(18:2_22:1)	GP	PE	40	3	796.585633	797.593456	[M-H]-	C45H84NO8P	0.282	0.674	0.47	0.1982	0.562	0.396	0.29	0.26	0.532	0.0452	1.488	0.902	0.456	0.648	0.64	C00350	-	LMGP02010676	53479639	-	53479639	-	ko00563,ko00564,ko01100,ko04136,ko04140,ko04723,ko05167
LIPID-N-0868	PE(O-16:2_22:6)	GP	PE-O	38	8	744.496816	745.504641	[M-H]-	C43H72NO7P	0.864	0.828	0.892	0.686	1.982	1.878	0.96	0.356	0.794	N/A	3.04	2.58	0.706	1.23	1.252	C04475	-	-	-	-	-	-	ko00565,ko01100
LIPID-N-0865	PE(O-20:1_22:6)	GP	PE-O	42	7	802.575066	803.582891	[M-H]-	C47H82NO7P	3.48	1.086	1.308	3.04	7.14	7.96	1.734	1.344	1.702	0.54	8.6	3.38	3.86	4.36	4.32	C04475	-	-	-	-	-	-	ko00565,ko01100
LIPID-N-0871	PE(O-18:2_22:6)	GP	PE-O	40	8	772.528116	773.535941	[M-H]-	C45H76NO7P	87.8	34.4	60.8	62.8	120.6	109	51.8	43.2	67.2	7.6	332	147.8	81	79.4	97	C04475	-	-	-	-	-	-	ko00565,ko01100
LIPID-N-0862	PE(O-18:3_22:4)	GP	PE-O	40	7	774.543766	775.551591	[M-H]-	C45H78NO7P	1.134	0.838	0.428	0.972	2.24	2.54	1.03	N/A	0.908	0.1758	3.22	2.1	1.498	1.314	1.258	C04475	-	-	-	-	-	-	ko00565,ko01100
LIPID-N-0873	PE(O-20:2_22:6)	GP	PE-O	42	8	800.559416	801.567241	[M-H]-	C47H80NO7P	1.44	0.372	0.922	1.052	2.34	1.838	0.812	0.602	0.816	N/A	2.86	1.998	1.524	1.47	1.316	C04475	-	-	-	-	-	-	ko00565,ko01100
LIPID-N-0860	PE(O-20:3_20:4)	GP	PE-O	40	7	774.543766	775.551591	[M-H]-	C45H78NO7P	1.36	0.938	1.916	1.394	5.04	3.46	1.676	0.724	1.346	N/A	2.88	2.62	1.828	2.42	2.14	C04475	-	-	-	-	-	-	ko00565,ko01100
LIPID-N-0794	PE(O-18:1_20:3)	GP	PE-O	38	4	752.559416	753.567241	[M-H]-	C43H80NO7P	3.54	1.7	3.12	7.22	11.86	8.68	3.3	2.02	3.92	0.636	7.44	6.52	5.88	6.88	5.56	C04475	-	-	-	-	-	-	ko00565,ko01100
LIPID-N-0793	PE(O-18:0_20:4)	GP	PE-O	38	4	752.559416	753.567241	[M-H]-	C43H80NO7P	13.72	10.24	12.9	17.22	38.4	33	13.02	11.4	9.56	2.32	57	33.8	19.86	25.6	25	C04475	-	LMGP02020092	52925027	-	-	-	ko00565,ko01100
LIPID-N-0791	PE(O-18:2_18:2)	GP	PE-O	36	4	724.528116	725.535941	[M-H]-	C41H76NO7P	6.74	5.6	6.72	11.1	14.72	10.34	5.58	8.02	5.72	2.48	57.8	10.88	12.4	10.52	14.3	C04475	-	-	-	-	-	-	ko00565,ko01100
LIPID-N-0789	PE(O-16:1_20:3)	GP	PE-O	36	4	724.528116	725.535941	[M-H]-	C41H76NO7P	18.86	19.64	22.2	44.8	59.4	43.6	15.6	26.2	24.6	10.44	69.6	39.8	33.4	39	38.8	C04475	-	-	-	-	-	-	ko00565,ko01100
LIPID-N-0788	PE(O-16:0_20:4)	GP	PE-O	36	4	724.528116	725.535941	[M-H]-	C41H76NO7P	13.08	19.4	21.2	23	57.2	64.2	16.68	18.84	18.28	1.914	57.6	61.4	30.4	33	30.6	C04475	-	LMGP02020019	42607456	-	-	-	ko00565,ko01100
LIPID-N-0784	PE(O-18:0_22:3)	GP	PE-O	40	3	782.606366	783.614191	[M-H]-	C45H86NO7P	0.81	0.658	0.964	1.63	1.89	1.644	0.686	1.352	0.786	0.268	2.42	1.496	1.302	1.502	1.328	C04475	-	-	-	-	-	-	ko00565,ko01100
LIPID-N-0783	PE(O-18:1_22:2)	GP	PE-O	40	3	782.606366	783.614191	[M-H]-	C45H86NO7P	0.222	0.214	0.258	0.392	0.554	0.35	0.1684	0.272	0.266	0.1442	0.824	0.548	0.486	0.464	0.428	C04475	-	-	-	-	-	-	ko00565,ko01100
LIPID-N-0780	PE(O-20:0_20:3)	GP	PE-O	40	3	782.606366	783.614191	[M-H]-	C45H86NO7P	0.778	0.354	0.254	0.652	0.918	0.796	0.1388	0.686	0.32	0.244	2.44	0.638	0.73	0.778	0.638	C04475	-	LMGP02020082	52925017	-	-	-	ko00565,ko01100
LIPID-N-0778	PE(O-18:2_20:1)	GP	PE-O	38	3	754.575066	755.582891	[M-H]-	C43H82NO7P	0.17	0.1288	0.202	0.33	0.97	0.288	0.0754	0.1212	0.354	N/A	0.676	0.8	0.328	0.524	0.506	C04475	-	-	-	-	-	-	ko00565,ko01100
LIPID-N-0777	PE(O-20:1_18:2)	GP	PE-O	38	3	754.575066	755.582891	[M-H]-	C43H82NO7P	0.328	0.145	0.238	0.532	1.57	0.836	0.304	0.149	0.106	0.1316	1.5	0.662	0.544	0.73	0.574	C04475	-	-	-	-	-	-	ko00565,ko01100
LIPID-N-0773	PE(O-18:1_18:2)	GP	PE-O	36	3	726.543766	727.551591	[M-H]-	C41H78NO7P	5.96	3.18	4.14	9.72	20.2	11.16	4.78	4.54	3.88	1.824	34.4	11.78	10.12	10.58	10.62	C04475	-	-	-	-	-	-	ko00565,ko01100
LIPID-N-0861	PE(O-18:2_22:5)	GP	PE-O	40	7	774.543766	775.551591	[M-H]-	C45H78NO7P	6.7	3.02	7.36	5.14	7.5	7.98	3.06	7.12	6.66	1.48	N/A	6.52	5.42	6.44	5.1	C04475	-	-	-	-	-	-	ko00565,ko01100
LIPID-N-0760	PE(O-20:1_18:1)	GP	PE-O	38	2	756.590716	757.598541	[M-H]-	C43H84NO7P	0.518	0.29	0.294	0.55	1.214	0.74	0.316	0.436	0.264	0.244	2.24	0.756	0.692	0.878	0.842	C04475	-	-	-	-	-	-	ko00565,ko01100
LIPID-N-0759	PE(O-16:1_22:1)	GP	PE-O	38	2	756.590716	757.598541	[M-H]-	C43H84NO7P	0.338	0.374	0.366	0.642	0.91	0.616	0.34	0.48	0.506	0.1594	1.802	1.212	0.66	0.894	0.778	C04475	-	-	-	-	-	-	ko00565,ko01100
LIPID-N-0758	PE(O-18:1_20:1)	GP	PE-O	38	2	756.590716	757.598541	[M-H]-	C43H84NO7P	0.734	0.534	0.938	1.284	2.36	1.224	0.784	0.91	1.138	0.402	2.88	1.868	1.256	1.47	1.566	C04475	-	-	-	-	-	-	ko00565,ko01100
LIPID-N-0753	PE(O-18:1_18:1)	GP	PE-O	36	2	728.559416	729.567241	[M-H]-	C41H80NO7P	4.06	3.04	3.92	5.36	8.78	5.54	3.14	3.84	4.14	2.08	18.12	9.74	5.46	6.7	6.6	C04475	-	-	-	-	-	-	ko00565,ko01100
LIPID-N-0750	PE(O-16:1_18:1)	GP	PE-O	34	2	700.528116	701.535941	[M-H]-	C39H76NO7P	14.46	12.92	15.04	25	34.2	21.2	12.28	21	16.54	6.72	77.4	34.4	23.2	25	26.8	C04475	-	-	-	-	-	-	ko00565,ko01100
LIPID-N-0749	PE(O-16:0_18:2)	GP	PE-O	34	2	700.528116	701.535941	[M-H]-	C39H76NO7P	0.318	0.592	0.354	1.182	0.826	2.6	1.17	0.664	0.616	0.23	1.268	1.508	0.922	1.32	1.062	C04475	-	LMGP02020100	52925035	-	-	-	ko00565,ko01100
LIPID-N-0748	PE(O-16:1_16:1)	GP	PE-O	32	2	672.496816	673.504641	[M-H]-	C37H72NO7P	1.254	2.1	1.384	1.544	3.6	3.18	1.362	1.538	1.472	0.938	11.5	5.88	2.72	2.76	3.02	C04475	-	-	-	-	-	-	ko00565,ko01100
LIPID-N-0734	PE(O-16:1_16:0)	GP	PE-O	32	1	674.512466	675.520291	[M-H]-	C37H74NO7P	1.64	1.698	2.04	3.32	4.78	3.04	0.984	1.392	1.898	0.474	6.64	5.88	3.02	2.26	2.56	C04475	-	-	-	-	-	-	ko00565,ko01100
LIPID-N-0729	PE(O-16:0_16:0)	GP	PE-O	32	0	676.528116	677.535941	[M-H]-	C37H76NO7P	0.388	0.462	0.578	1.038	1.25	1.276	0.464	0.492	0.508	N/A	2.62	1.604	1.118	1.326	0.816	C04475	-	LMGP02020103	52925038	-	-	-	ko00565,ko01100
LIPID-N-0795	PE(O-18:2_20:2)	GP	PE-O	38	4	752.559416	753.567241	[M-H]-	C43H80NO7P	1.378	0.956	0.948	1.478	2.24	1.95	0.404	1.212	0.922	0.306	2.38	1.868	1.688	1.764	1.486	C04475	-	-	-	-	-	-	ko00565,ko01100
LIPID-N-0801	PE(O-20:0_22:4)	GP	PE-O	42	4	808.622016	809.629841	[M-H]-	C47H88NO7P	0.298	0.0912	0.1192	0.232	0.44	0.378	0.1614	0.208	0.102	0.0554	0.734	0.214	0.3	0.324	0.296	C04475	-	LMGP02020088	52925023	-	-	-	ko00565,ko01100
LIPID-N-0763	PE(O-18:1_22:1)	GP	PE-O	40	2	784.622016	785.629841	[M-H]-	C45H88NO7P	0.191	0.1584	0.226	0.39	0.534	0.442	0.1792	0.262	0.272	0.0978	1.04	0.492	0.29	0.42	0.354	C04475	-	-	-	-	-	-	ko00565,ko01100
LIPID-N-0810	PE(O-20:5_16:0)	GP	PE-O	36	5	722.512466	723.520291	[M-H]-	C41H74NO7P	4.78	0.844	0.928	1.61	1.164	1.064	0.878	2.6	2.06	1.548	5.08	3.14	2.34	2.06	2.6	C04475	-	-	-	-	-	-	ko00565,ko01100
LIPID-N-0859	PE(O-18:1_22:6)	GP	PE-O	40	7	774.543766	775.551591	[M-H]-	C45H78NO7P	44	15	26.6	34	80.6	69.8	31.6	19.04	35.2	6.14	100.2	73	45	53	47.6	C04475	-	-	-	-	-	-	ko00565,ko01100
LIPID-N-0809	PE(O-16:1_20:4)	GP	PE-O	36	5	722.512466	723.520291	[M-H]-	C41H74NO7P	316	183	306	344	738	636	300	186	290	59.4	942	740	346	470	450	C04475	-	-	-	-	-	-	ko00565,ko01100
LIPID-N-0857	PE(O-16:1_22:6)	GP	PE-O	38	7	746.512466	747.520291	[M-H]-	C43H74NO7P	111.4	49.6	97.6	87.8	186.6	189.2	92.4	68.2	109	25.2	362	226	116.8	127	125.8	C04475	-	-	-	-	-	-	ko00565,ko01100
LIPID-N-0854	PE(O-15:1_22:6)	GP	PE-O	37	7	732.496816	733.504641	[M-H]-	C42H72NO7P	0.542	N/A	0.426	0.946	1.442	1.924	0.626	0.68	0.506	0.292	2.38	1.236	1.048	1.376	0.95	C04475	-	-	-	-	-	-	ko00565,ko01100
LIPID-N-0843	PE(O-18:0_22:6)	GP	PE-O	40	6	776.559416	777.567241	[M-H]-	C45H80NO7P	4.8	1.716	2.56	4.66	7.8	8.08	3.32	2.54	2.88	0.736	18.58	8.6	4.74	6.08	5.96	C04475	-	LMGP02020104	52923729	-	-	-	ko00565,ko01100
LIPID-N-0842	PE(O-18:1_22:5)	GP	PE-O	40	6	776.559416	777.567241	[M-H]-	C45H80NO7P	10.92	8.86	13.16	18.8	42.8	29.8	16.04	4.8	11.86	2.62	43.8	30.6	21.4	23.2	23.2	C04475	-	-	-	-	-	-	ko00565,ko01100
LIPID-N-0841	PE(O-17:1_22:5)	GP	PE-O	39	6	762.543766	763.551591	[M-H]-	C44H78NO7P	0.88	0.67	N/A	0.87	1.662	2.18	1.24	0.976	0.778	0.466	2.3	1.56	0.948	1.376	0.806	C04475	-	-	-	-	-	-	ko00565,ko01100
LIPID-N-0840	PE(O-16:1_22:5)	GP	PE-O	38	6	748.528116	749.535941	[M-H]-	C43H76NO7P	47.6	34.6	52.2	51.4	127.6	146.2	61.6	20.8	38.6	10.72	230	121.6	71.8	74.6	77.6	C04475	-	-	-	-	-	-	ko00565,ko01100
LIPID-N-0839	PE(O-16:0_22:6)	GP	PE-O	38	6	748.528116	749.535941	[M-H]-	C43H76NO7P	7.56	3.42	5.94	7.68	15.28	16.58	7.2	7.38	8.74	1.104	26.4	18.34	8.4	8.68	11.42	C04475	-	LMGP02020020	22833649	-	-	-	ko00565,ko01100
LIPID-N-0837	PE(O-18:2_20:4)	GP	PE-O	38	6	748.528116	749.535941	[M-H]-	C43H76NO7P	210	123.6	191.2	163.4	424	398	186	112.2	157.6	36.4	596	364	228	256	256	C04475	-	-	-	-	-	-	ko00565,ko01100
LIPID-N-0806	PE(O-15:1_20:4)	GP	PE-O	35	5	708.496816	709.504641	[M-H]-	C40H72NO7P	0.702	0.552	1.41	1.908	2.12	3.22	1.928	0.804	0.932	0.542	6.42	2.22	1.522	2.16	1.466	C04475	-	-	-	-	-	-	ko00565,ko01100
LIPID-N-0831	PE(O-16:1_20:5)	GP	PE-O	36	6	720.496816	721.504641	[M-H]-	C41H72NO7P	2.74	2.44	2.78	4.02	7.48	5.38	3.92	3.06	2.24	1.42	19.5	5.28	3.12	2.64	4.26	C04475	-	-	-	-	-	-	ko00565,ko01100
LIPID-N-0828	PE(O-18:1_24:4)	GP	PE-O	42	5	806.606366	807.614191	[M-H]-	C47H86NO7P	0.584	0.292	0.56	0.64	1.442	0.994	0.542	0.286	0.376	N/A	2.18	1.236	0.846	0.8	1.012	C04475	-	-	-	-	-	-	ko00565,ko01100
LIPID-N-0826	PE(O-20:1_22:4)	GP	PE-O	42	5	806.606366	807.614191	[M-H]-	C47H86NO7P	0.264	0.1822	0.328	0.57	1.522	0.716	0.294	0.1554	0.264	0.084	0.692	0.376	0.486	0.516	0.522	C04475	-	-	-	-	-	-	ko00565,ko01100
LIPID-N-0825	PE(O-22:1_20:4)	GP	PE-O	42	5	806.606366	807.614191	[M-H]-	C47H86NO7P	0.374	0.192	0.208	0.404	1.328	0.67	0.216	0.24	0.254	N/A	1.51	0.646	0.574	0.568	0.586	C04475	-	-	-	-	-	-	ko00565,ko01100
LIPID-N-0823	PE(O-16:1_24:4)	GP	PE-O	40	5	778.575066	779.582891	[M-H]-	C45H82NO7P	1.306	0.8	1.496	1.888	4.7	3.14	1.26	0.934	1.112	0.3	6.28	3.48	2.24	2.78	2.8	C04475	-	-	-	-	-	-	ko00565,ko01100
LIPID-N-0821	PE(O-20:1_20:4)	GP	PE-O	40	5	778.575066	779.582891	[M-H]-	C45H82NO7P	7.38	2.52	4.8	10.14	39.6	17.72	5.1	3.82	5.08	0.908	26	19.96	13.14	15.64	15.48	C04475	-	-	-	-	-	-	ko00565,ko01100
LIPID-N-0820	PE(O-18:1_22:4)	GP	PE-O	40	5	778.575066	779.582891	[M-H]-	C45H82NO7P	12.1	7.54	14.52	17.98	42	22	14.1	5.58	12.54	3.26	34.4	27	18.5	21.6	20.4	C04475	-	-	-	-	-	-	ko00565,ko01100
LIPID-N-0811	PE(O-17:1_20:4)	GP	PE-O	37	5	736.528116	737.535941	[M-H]-	C42H76NO7P	3.86	3.28	4.68	5.22	11.68	6.9	5.14	2.28	5.82	2.52	13.36	7.3	6.52	7.16	7.08	C04475	-	-	-	-	-	-	ko00565,ko01100
LIPID-N-0814	PE(O-18:1_20:4)	GP	PE-O	38	5	750.543766	751.551591	[M-H]-	C43H78NO7P	115.8	62.6	102.8	154.2	332	214	113.2	60.2	101	24.2	348	260	155.6	189	190.6	C04475	-	-	-	-	-	-	ko00565,ko01100
LIPID-N-0833	PE(O-16:2_20:4)	GP	PE-O	36	6	720.496816	721.504641	[M-H]-	C41H72NO7P	2.88	1.706	3.52	2.8	8.62	6.5	2.08	1.466	2.44	0.626	7.62	4.3	3.06	2.54	3.66	C04475	-	-	-	-	-	-	ko00565,ko01100
LIPID-N-0816	PE(O-17:1_22:4)	GP	PE-O	39	5	764.559416	765.567241	[M-H]-	C44H80NO7P	2.32	1.49	3.18	4.48	8.8	5.8	2.56	1.41	2.74	0.516	7	5.52	4.12	4.76	5.12	C04475	-	-	-	-	-	-	ko00565,ko01100
LIPID-P-1357	PE(P-18:1_20:3)	GP	PE-P	38	4	752.559416	751.551591	[M+H]+	C43H78NO7P	89.4	57.4	47.4	136.4	218	80.4	74.2	118.4	80.6	10.26	482	135.6	117	125.4	132.6	C04756	-	-	-	-	-	-	ko00565,ko01100
LIPID-P-1352	PE(P-14:0_20:4)	GP	PE-P	34	4	696.496816	695.488991	[M+H]+	C39H70NO7P	10.9	4.36	8.5	12.2	37.2	18.2	17.14	5.36	7.96	1.396	54.4	20.2	22	15.74	24.2	C04756	-	-	-	-	-	-	ko00565,ko01100
LIPID-P-1349	PE(P-18:0_24:3)	GP	PE-P	42	3	810.637666	809.629841	[M+H]+	C47H88NO7P	5.18	3.36	4.12	15.88	32.6	10.84	9.96	5.3	9.1	1.43	38	14.96	11.52	10.2	14.1	C04756	-	-	-	-	-	-	ko00565,ko01100
LIPID-P-1346	PE(P-20:0_20:3)	GP	PE-P	40	3	782.606366	781.598541	[M+H]+	C45H84NO7P	6.12	1.158	2.64	14.9	25.2	10.32	5	4.66	3.14	0.81	28.8	5.82	9.76	12.36	15.02	C04756	-	LMGP02030084	52925117	-	-	-	ko00565,ko01100
LIPID-P-1323	PE(P-18:0_20:1)	GP	PE-P	38	1	758.606366	757.598541	[M+H]+	C43H84NO7P	11.5	5.94	5.76	15.04	30	13.28	18.84	13.34	8.08	2.5	77.4	18.42	20.2	15.62	24.6	C04756	HMDB0011381	LMGP02030053	52925086	-	-	-	ko00565,ko01100
LIPID-P-1340	PE(P-16:0_20:3)	GP	PE-P	36	3	726.543766	725.535941	[M+H]+	C41H76NO7P	183.2	144	144.8	454	614	304	282	314	252	48.6	1392	388	362	318	424	C04756	HMDB0011351	LMGP02030027	52925060	-	-	-	ko00565,ko01100
LIPID-P-1331	PE(P-18:0_18:2)	GP	PE-P	36	2	728.559416	727.551591	[M+H]+	C41H78NO7P	59.2	24.4	28.2	84	172	65	74.8	52.4	30.6	9.56	520	86	84.6	85	121.2	C04756	HMDB0011376	LMGP02030046	52925079	205648-90-4	-	-	ko00565,ko01100
LIPID-P-1362	PE(P-19:0_20:4)	GP	PE-P	39	4	766.575066	765.567241	[M+H]+	C44H80NO7P	7.68	0.494	4.24	6.1	29	6	11.54	4.4	5.38	0.768	27.8	13.16	10.44	9.36	14.36	C04756	-	-	-	-	-	-	ko00565,ko01100
LIPID-P-1322	PE(P-20:0_18:1)	GP	PE-P	38	1	758.606366	757.598541	[M+H]+	C43H84NO7P	4.56	4.04	2.42	9.24	22.6	7	7.32	7.52	2.74	1.16	43.8	6.88	6.3	9.26	11.68	C04756	-	LMGP02030074	52925107	-	-	-	ko00565,ko01100
LIPID-P-1345	PE(P-16:0_22:3)	GP	PE-P	38	3	754.575066	753.567241	[M+H]+	C43H80NO7P	141.4	117.8	128	324	612	280	200	206	192.8	24.4	1246	342	366	350	452	C04756	-	-	-	-	-	-	ko00565,ko01100
LIPID-P-1373	PE(P-16:1_20:4)	GP	PE-P	36	5	722.512466	721.504641	[M+H]+	C41H72NO7P	17.48	10.18	11.58	25.4	34	28	30.2	13.62	16.26	3.46	83.8	41.6	19.78	21.6	23.8	C04756	-	-	-	-	-	-	ko00565,ko01100
LIPID-P-1377	PE(P-18:1_22:4)	GP	PE-P	40	5	778.575066	777.567241	[M+H]+	C45H80NO7P	30.4	9.18	30.4	41.2	222	82.2	65.6	16.44	50.6	1.58	258	64.8	80	74.4	81.8	C04756	-	-	-	-	-	-	ko00565,ko01100
LIPID-P-1375	PE(P-18:0_20:5)	GP	PE-P	38	5	750.543766	749.535941	[M+H]+	C43H76NO7P	35.8	16.32	20.2	52.2	67.4	42.8	43.4	18.34	19.68	5.52	172.6	43.8	39.2	45.8	52.6	C04756	HMDB0011387	LMGP02030056	52925089	-	-	-	ko00565,ko01100
LIPID-P-1376	PE(P-16:0_24:5)	GP	PE-P	40	5	778.575066	777.567241	[M+H]+	C45H80NO7P	19.92	8.68	9.1	23.2	45.6	19.22	17.14	15.16	16.62	2.16	75.4	21.4	23.4	29.8	29.6	C04756	-	-	-	-	-	-	ko00565,ko01100
LIPID-P-1380	PE(P-20:0_22:5)	GP	PE-P	42	5	806.606366	805.598541	[M+H]+	C47H84NO7P	3.52	2.36	3.16	9.36	21	11.72	8.2	1.882	3	0.366	34.6	8.46	7.92	8.9	12.16	C04756	-	-	-	-	-	-	ko00565,ko01100
LIPID-P-1381	PE(P-22:1_20:4)	GP	PE-P	42	5	806.606366	805.598541	[M+H]+	C47H84NO7P	13.64	4.48	4.86	18.34	70.8	31.4	21.2	7.46	8.26	1.286	82	23.8	25	22.8	34.2	C04756	-	-	-	-	-	-	ko00565,ko01100
LIPID-P-1382	PE(P-18:0_24:5)	GP	PE-P	42	5	806.606366	805.598541	[M+H]+	C47H84NO7P	7.68	2.36	3.42	9.7	22.8	8.14	9.24	3.1	4.44	1.18	22.4	9.14	8.58	8.08	12.52	C04756	-	-	-	-	-	-	ko00565,ko01100
LIPID-P-1386	PE(P-14:0_22:6)	GP	PE-P	36	6	720.496816	719.488991	[M+H]+	C41H70NO7P	14.8	4.04	4.24	7.22	21.8	14.7	14.18	2.66	8.44	1.068	53.4	10.78	10.56	8.58	12.24	C04756	-	-	-	-	-	-	ko00565,ko01100
LIPID-P-1387	PE(P-18:1_20:5)	GP	PE-P	38	6	748.528116	747.520291	[M+H]+	C43H74NO7P	19.46	13.78	13.2	22.4	68.2	22.2	43.2	12.52	16.8	6.02	105.6	32.8	25.8	25	21.6	C04756	-	-	-	-	-	-	ko00565,ko01100
LIPID-P-1388	PE(P-18:2_20:4)	GP	PE-P	38	6	748.528116	747.520291	[M+H]+	C43H74NO7P	18.52	8.86	10.88	22.2	35.4	25.4	22.6	12.54	12.06	2.32	52.8	27	18.52	15.76	18.56	C04756	-	-	-	-	-	-	ko00565,ko01100
LIPID-P-1390	PE(P-18:1_22:5)	GP	PE-P	40	6	776.559416	775.551591	[M+H]+	C45H78NO7P	108.2	32.4	53	48	68.4	49.4	97.2	74	102.8	8.78	113.6	47.6	74	64.4	86.6	C04756	-	-	-	-	-	-	ko00565,ko01100
LIPID-P-1401	PE(P-20:1_22:6)	GP	PE-P	42	7	802.575066	801.567241	[M+H]+	C47H80NO7P	6	2.16	2.3	2.98	14.42	4.74	6.3	2.32	2.98	N/A	34.4	6.84	7.24	8.28	7.14	C04756	-	-	-	-	-	-	ko00565,ko01100
LIPID-P-1403	PE(P-22:1_22:6)	GP	PE-P	44	7	830.606366	829.598541	[M+H]+	C49H84NO7P	8.18	2.84	3.3	15.4	55.8	27.4	6.7	4.56	5.66	1.086	62.8	15.44	15.84	19.14	25.6	C04756	-	-	-	-	-	-	ko00565,ko01100
LIPID-P-1405	PE(P-18:2_22:6)	GP	PE-P	40	8	772.528116	771.520291	[M+H]+	C45H74NO7P	21.2	3.84	4.52	6.62	23.2	8.44	12.7	7.66	5.84	1.936	39.8	24.4	9.78	10.28	15.48	C04756	-	-	-	-	-	-	ko00565,ko01100
LIPID-P-1374	PE(P-16:0_22:5)	GP	PE-P	38	5	750.543766	749.535941	[M+H]+	C43H76NO7P	366	192.8	268	504	928	664	820	236	362	55.8	2620	746	622	496	724	C04756	-	-	-	-	-	-	ko00565,ko01100
LIPID-P-1389	PE(P-17:0_22:6)	GP	PE-P	39	6	762.543766	761.535941	[M+H]+	C44H76NO7P	28.6	5.78	8.58	21.8	36	32.4	35.2	16.76	11.1	3.48	106.6	41.8	27.6	32.2	27.2	C04756	-	-	-	-	-	-	ko00565,ko01100
LIPID-P-0664	PE(P-18:1_22:6)	GP	PE-P	40	7	774.543766	773.535941	[M+H]+	C45H76NO7P	10.24	6.66	16.04	27	11.56	6.22	26.4	10.66	10.72	2.36	72.6	28.4	17.32	20.8	22.8	C04756	HMDB0011460	LMGP02030006	52925039	-	-	-	ko00565,ko01100
LIPID-P-0631	PE(P-18:0_18:0)	GP	PE-P	36	0	732.590716	731.582891	[M+H]+	C41H82NO7P	57	30.4	37.4	88.6	157.4	79.4	86.2	57.6	27.4	7.9	374	103.8	109.6	92.2	142.2	C04756	HMDB0011373	LMGP02030045	52925078	-	-	-	ko00565,ko01100
LIPID-P-0632	PE(P-18:0_20:0)	GP	PE-P	38	0	760.622016	759.614191	[M+H]+	C43H86NO7P	29.6	13.04	7.08	38.6	68.2	40.2	42.6	25.2	16.8	4	181.8	30.8	21	33.4	36	C04756	HMDB0011380	LMGP02030052	52925085	-	-	-	ko00565,ko01100
LIPID-P-0644	PE(P-18:0_22:2)	GP	PE-P	40	2	784.622016	783.614191	[M+H]+	C45H86NO7P	12.58	3.7	3.34	15.7	26.8	14.16	5	7.02	3.76	1.752	60.8	11.46	17.74	11.54	13.6	C04756	HMDB0011390	LMGP02030060	52925093	-	-	-	ko00565,ko01100
LIPID-P-0646	PE(P-15:0_20:3)	GP	PE-P	35	3	712.528116	711.520291	[M+H]+	C40H74NO7P	1320	818	638	1012	646	926	1360	1130	758	1476	668	838	1194	1238	1338	C04756	-	-	-	-	-	-	ko00565,ko01100
LIPID-P-0647	PE(P-18:1_18:2)	GP	PE-P	36	3	726.543766	725.535941	[M+H]+	C41H76NO7P	63.4	67.4	47.2	91	157.4	96.4	77.6	61	40.8	12.56	244	157.8	98.8	91.4	92	C04756	HMDB0011377	LMGP02030047	52925080	-	-	-	ko00565,ko01100
LIPID-P-0661	PE(P-16:0_22:6)	GP	PE-P	38	6	748.528116	747.520291	[M+H]+	C43H74NO7P	14.76	6.4	9.26	10.12	23.2	16.42	13.98	24.8	19.22	3.48	65.2	40.2	22.8	21.4	13.04	C04756	HMDB0005780	LMGP02030001	5283497	206059-97-4	-	-	ko00565,ko01100
LIPID-P-0649	PE(P-18:0_20:3)	GP	PE-P	38	3	754.575066	753.567241	[M+H]+	C43H80NO7P	326	131.2	117	198.2	516	276	298	216	159	32	1388	368	306	300	374	C04756	HMDB0011383	LMGP02030055	53480854	-	-	-	ko00565,ko01100
LIPID-P-0651	PE(P-15:0_20:4)	GP	PE-P	35	4	710.512466	709.504641	[M+H]+	C40H72NO7P	190.8	146	123.4	192.2	230	146	238	185.4	128.6	234	172.2	134.4	202	272	270	C04756	-	-	-	-	-	-	ko00565,ko01100
LIPID-P-0658	PE(P-18:1_20:4)	GP	PE-P	38	5	750.543766	749.535941	[M+H]+	C43H76NO7P	108.2	59.6	48.2	86.8	82.4	42.8	157.2	125	60	76.6	48.4	63.2	82.2	53.8	96.8	C04756	-	-	85366510	-	-	-	ko00565,ko01100
LIPID-P-0660	PE(P-18:0_22:5)	GP	PE-P	40	5	778.575066	777.567241	[M+H]+	C45H80NO7P	294	58.2	90.8	282	806	336	242	167.4	172.4	18.9	1914	614	390	402	546	C04756	HMDB0011418	-	53480878	-	-	-	ko00565,ko01100
LIPID-P-0648	PE(P-17:0_20:3)	GP	PE-P	37	3	740.559416	739.551591	[M+H]+	C42H78NO7P	157.8	88.2	53	159	145.4	135.8	146.8	133.2	115.2	25.8	2440	145.6	206	224	268	C04756	-	-	-	-	-	-	ko00565,ko01100
LIPID-N-1158	PG(16:0_20:2)	GP	PG	36	2	773.5332657	774.5410857	[M-H]-	C42H79O10P	2.04	2.61	2.21	2.45	2.41	2.71	2.44	3.51	1.49	3.42	4.26	1.3	0.83	1.21	1.08	C00344	-	LMGP04010197	52926462	-	-	-	ko00564,ko01100
LIPID-N-1156	PG(16:1_17:1)	GP	PG	33	2	731.4863155	732.4941355	[M-H]-	C39H73O10P	11.8	8.06	13.6	18.2	36.8	33.1	15.6	11.9	22.6	3.33	144	21.5	15.6	18.6	17.2	C00344	-	LMGP04010209	52926474	-	-	-	ko00564,ko01100
LIPID-N-1155	PG(16:0_17:2)	GP	PG	33	2	731.4863155	732.4941355	[M-H]-	C39H73O10P	8.95	8.68	9.17	11.3	18.7	14.8	8.64	11.3	11.1	7.23	63.5	11.2	9.7	9.51	9.24	C00344	-	LMGP04010195	52926460	-	-	-	ko00564,ko01100
LIPID-N-1153	PG(15:0_18:2)	GP	PG	33	2	731.4863155	732.4941355	[M-H]-	C39H73O10P	4.11	2.1	3.46	2.92	8.6	10.9	3.99	2.09	5.01	0.727	52.9	4.24	3.85	4.54	5.7	C00344	-	LMGP04010344	52926609	-	-	-	ko00564,ko01100
LIPID-N-1152	PG(16:0_16:2)	GP	PG	32	2	717.4706655	718.4784855	[M-H]-	C38H71O10P	30.8	33.5	33.1	31.9	85.1	58.1	26.1	22.1	37.1	5.95	281	50.4	39.2	26.5	29.9	C00344	-	-	-	-	-	-	ko00564,ko01100
LIPID-N-1151	PG(14:0_18:2)	GP	PG	32	2	717.4706655	718.4784855	[M-H]-	C38H71O10P	4.51	3.41	3.49	5.23	16.4	14	4.87	3.92	6.74	1.2	42.2	4.81	5.36	3.98	4.54	C00344	-	LMGP04010342	52926607	-	-	-	ko00564,ko01100
LIPID-N-1148	PG(22:0_18:1)	GP	PG	40	1	831.6115161	832.6193361	[M-H]-	C46H89O10P	59.2	116	113	118	294	225	113	66.9	126	21.4	610	152	103	92.8	98.8	C00344	-	LMGP04010946	52927209	-	-	-	ko00564,ko01100
LIPID-N-1145	PG(19:0_20:1)	GP	PG	39	1	817.595866	818.603686	[M-H]-	C45H87O10P	11.2	9.69	13.4	9.19	30.1	12.8	13.9	7.45	16.7	1.32	67	11.1	13.3	11.7	10.9	C00344	-	LMGP04010469	52926734	-	-	-	ko00564,ko01100
LIPID-N-1144	PG(22:0_17:1)	GP	PG	39	1	817.595866	818.603686	[M-H]-	C45H87O10P	0.966	2.52	1.87	2.06	8.52	5.3	2.51	1.29	3.44	0.203	12.4	2.71	2.04	3.09	1.8	C00344	-	LMGP04010273	52926538	-	-	-	ko00564,ko01100
LIPID-N-1142	PG(18:0_20:1)	GP	PG	38	1	803.5802159	804.5880359	[M-H]-	C44H85O10P	10.6	3.33	4.67	5.76	16	7.58	4.67	4.36	7.98	0.551	55.8	6.05	6.24	6.09	4.38	C00344	-	LMGP04010539	52926804	-	-	-	ko00564,ko01100
LIPID-N-1135	PG(18:0_16:1)	GP	PG	34	1	747.5176157	748.5254357	[M-H]-	C40H77O10P	15.8	7.73	9.88	12.5	49.2	33	10.8	10.7	13.9	2.06	81.8	33	16.6	14.1	13.7	C00344	HMDB0010587	LMGP04010211	52926476	-	-	-	ko00564,ko01100
LIPID-N-1140	PG(16:0_22:1)	GP	PG	38	1	803.5802159	804.5880359	[M-H]-	C44H85O10P	37.9	37.4	45.6	41.1	125	144	35.1	37.1	44.7	11	458	85.3	52.9	42.9	44.5	C00344	-	LMGP04010199	52926464	-	-	-	ko00564,ko01100
LIPID-N-1132	PG(15:0_16:1)	GP	PG	31	1	705.4706655	706.4784855	[M-H]-	C37H71O10P	1.54	0.701	1.35	N/A	4.54	4.45	1.24	1.39	1.48	0.215	17.5	3.62	2.87	2.15	2.55	C00344	-	LMGP04010205	52926470	-	-	-	ko00564,ko01100
LIPID-N-1130	PG(14:0_16:1)	GP	PG	30	1	691.4550154	692.4628354	[M-H]-	C36H69O10P	4.36	1.81	3.54	5.62	14.3	11.1	2.78	3.37	5.12	0.874	45.9	5.54	3.53	4.06	3.69	C00344	-	LMGP04010203	52926468	-	-	-	ko00564,ko01100
LIPID-N-1120	PG(16:0_22:0)	GP	PG	38	0	805.595866	806.603686	[M-H]-	C44H87O10P	131	113	111	124	484	417	132	149	230	32	1480	254	209	140	166	C00344	-	LMGP04010705	52926970	-	-	-	ko00564,ko01100
LIPID-N-1159	PG(18:0_19:2)	GP	PG	37	2	787.5489158	788.5567358	[M-H]-	C43H81O10P	12.1	7.3	9.87	12.5	45.8	33.4	15.7	4.79	14.9	0.833	77	21.7	15.3	15.2	13.6	C00344	-	-	-	-	-	-	ko00564,ko01100
LIPID-N-1117	PG(15:0_22:0)	GP	PG	37	0	791.5802159	792.5880359	[M-H]-	C43H85O10P	0.972	1.53	N/A	1.11	4.36	3.08	1.72	0.759	3.29	0.385	22.9	1.26	2.62	2.37	2.54	C00344	-	LMGP04010156	52926421	-	-	-	ko00564,ko01100
LIPID-N-1116	PG(17:0_19:0)	GP	PG	36	0	777.5645659	778.5723859	[M-H]-	C42H83O10P	23.3	4.65	13	16.1	75.2	59.9	12.3	9.8	24.4	2.95	210	32	23.1	19.3	21.1	C00344	-	LMGP04010237	52926502	-	-	-	ko00564,ko01100
LIPID-N-1115	PG(16:0_20:0)	GP	PG	36	0	777.5645659	778.5723859	[M-H]-	C42H83O10P	15.9	16.9	20.3	16.8	39	33.2	14.9	15	24.3	3.42	187	25.1	21.5	16.8	15.3	C00344	-	LMGP04010864	52927129	-	-	-	ko00564,ko01100
LIPID-N-1114	PG(17:0_18:0)	GP	PG	35	0	763.5489158	764.5567358	[M-H]-	C41H81O10P	587	218	327	380	1500	1210	381	306	564	75.3	3150	696	515	574	471	C00344	-	LMGP04010312	52926577	-	-	-	ko00564,ko01100
LIPID-N-1111	PG(14:0_16:0)	GP	PG	30	0	693.4706655	694.4784855	[M-H]-	C36H71O10P	3.9	0.681	0.536	1.09	2.18	2.07	0.769	1.69	1.52	0.317	5.36	1.34	1.39	1.2	0.912	C00344	-	LMGP04010974	-	-	-	-	ko00564,ko01100
LIPID-N-1141	PG(22:0_16:1)	GP	PG	38	1	803.5802159	804.5880359	[M-H]-	C44H85O10P	15	22.3	20.4	18.6	45.4	33.8	17.8	14.7	35.5	6.73	199	25.9	24.2	18.7	18.5	C00344	-	LMGP04010222	52926487	-	-	-	ko00564,ko01100
LIPID-N-1119	PG(18:0_19:0)	GP	PG	37	0	791.5802159	792.5880359	[M-H]-	C43H85O10P	1070	364	590	748	2250	1760	615	555	1190	109	6440	1310	1130	930	871	C00344	-	LMGP04010317	52926582	-	-	-	ko00564,ko01100
LIPID-N-1160	PG(18:1_19:1)	GP	PG	37	2	787.5489158	788.5567358	[M-H]-	C43H81O10P	138	17	21.5	36.8	97.1	69.9	34.3	49	35.9	9.51	391	42	63.5	58.6	55.5	C00344	-	LMGP04010492	52926757	-	-	-	ko00564,ko01100
LIPID-N-1167	PG(18:0_24:2)	GP	PG	42	2	857.6271661	858.6349861	[M-H]-	C48H91O10P	1.52	2.72	2.77	10.3	14.4	9.91	2.17	2.38	4.09	0.806	12.2	3.78	4.55	4.52	2.89	C00344	-	-	-	-	-	-	ko00564,ko01100
LIPID-N-1204	PG(14:0_20:5)	GP	PG	34	5	739.4550154	740.4628354	[M-H]-	C40H69O10P	1.63	0.462	0.877	1.26	4.35	3.91	1.49	1.12	1.73	0.187	15.2	1.38	1.57	1.9	1.64	C00344	-	LMGP04010650	52926915	-	-	-	ko00564,ko01100
LIPID-N-1205	PG(16:0_20:5)	GP	PG	36	5	767.4863155	768.4941355	[M-H]-	C42H73O10P	184	81	137	124	384	374	113	155	227	27.4	1090	251	163	155	141	C00344	-	LMGP04010654	52926919	-	-	-	ko00564,ko01100
LIPID-N-1206	PG(19:2_20:3)	GP	PG	39	5	809.5332657	810.5410857	[M-H]-	C45H79O10P	4.46	2.91	2.76	4.79	9.75	10.7	3.47	2.75	3.96	1	28.5	6.97	3.92	4.3	2.43	C00344	-	-	-	-	-	-	ko00564,ko01100
LIPID-N-1207	PG(21:1_20:4)	GP	PG	41	5	837.5645659	838.5723859	[M-H]-	C47H83O10P	0.515	0.409	0.685	N/A	1.16	2.11	0.439	0.327	0.848	N/A	3.64	0.317	0.572	0.933	0.768	C00344	-	-	-	-	-	-	ko00564,ko01100
LIPID-N-1208	PG(22:0_20:5)	GP	PG	42	5	851.5802159	852.5880359	[M-H]-	C48H85O10P	1.48	2.37	3.68	5.7	21.8	10.8	5.49	0.998	4.02	0.406	7.91	2.89	4.43	4.09	3.6	C00344	-	LMGP04010673	52926938	-	-	-	ko00564,ko01100
LIPID-N-1210	PG(16:1_20:5)	GP	PG	36	6	765.4706655	766.4784855	[M-H]-	C42H71O10P	11.8	11.3	12.8	11.1	35	29.7	14.6	7.91	17	1.53	130	16.4	13.3	13	11.7	C00344	-	LMGP04010220	52926485	-	-	-	ko00564,ko01100
LIPID-N-1216	PG(22:0_22:6)	GP	PG	44	6	877.595866	878.603686	[M-H]-	C50H87O10P	15.2	15.6	18.3	23.1	82.4	57.7	20	9.94	26.9	2.08	57.4	22.9	18.6	19.2	24	C00344	-	LMGP04010842	52927107	-	-	-	ko00564,ko01100
LIPID-N-1217	PG(16:3_22:4)	GP	PG	38	7	791.4863155	792.4941355	[M-H]-	C44H73O10P	1.45	1.94	3	2.96	9.93	8.81	2.7	1.71	5.16	0.182	18.2	4.54	4.15	3.18	2.88	C00344	-	-	-	-	-	-	ko00564,ko01100
LIPID-N-1220	PG(20:1_22:6)	GP	PG	42	7	847.5489158	848.5567358	[M-H]-	C48H81O10P	2.26	2.82	1.52	2.88	5.23	1.57	2.81	4.22	4.13	5.27	7.44	0.785	0.644	0.666	0.61	C00344	-	LMGP04010557	52926822	-	-	-	ko00564,ko01100
LIPID-N-1221	PG(20:4_20:4)	GP	PG	40	8	817.5019656	818.5097856	[M-H]-	C46H75O10P	31.65	1.395	2.31	1.18	10.6	7.6	4.085	5.75	5.65	0.64	279	29.25	17.65	17	15.4	C00344	HMDB0116589	LMGP04010858	52927123	-	-	-	ko00564,ko01100
LIPID-N-1225	PG(22:6_22:6)	GP	PG	44	12	865.5019656	866.5097856	[M-H]-	C50H75O10P	1075	23.2	48.3	95	530	434	196.5	218	412	49.7	2260	342	399	395.5	384.5	C00344	HMDB0116605	LMGP04010977	52927240	-	-	-	ko00564,ko01100
LIPID-N-1214	PG(20:0_22:6)	GP	PG	42	6	849.5645659	850.5723859	[M-H]-	C48H83O10P	22.3	1.28	1.34	4.65	13.6	13.4	7.62	4.55	5.05	0.943	20.9	2.09	6.94	6.2	5.61	C00344	-	LMGP04010835	52927100	-	-	-	ko00564,ko01100
LIPID-N-1161	PG(16:0_22:2)	GP	PG	38	2	801.5645659	802.5723859	[M-H]-	C44H83O10P	1	0.669	0.72	0.859	1.78	0.672	0.651	0.755	0.466	N/A	18.6	0.876	1.33	0.971	1.35	C00344	-	LMGP04010200	52926465	-	-	-	ko00564,ko01100
LIPID-N-1200	PG(22:0_20:4)	GP	PG	42	4	853.595866	854.603686	[M-H]-	C48H87O10P	37.3	31.7	39.9	47.9	206	115	51	29.9	64.7	6.92	220	64.4	46.3	41.2	43	C00344	-	LMGP04010644	52926909	-	-	-	ko00564,ko01100
LIPID-N-1198	PG(21:0_20:4)	GP	PG	41	4	839.5802159	840.5880359	[M-H]-	C47H85O10P	3.23	1.49	2.1	3.21	7.22	8.68	1.58	0.835	2.28	N/A	16.5	5.53	4.13	2.62	2.49	C00344	-	LMGP04010643	52926908	-	-	-	ko00564,ko01100
LIPID-N-1171	PG(16:1_16:2)	GP	PG	32	3	715.4550154	716.4628354	[M-H]-	C38H69O10P	11.9	17.1	14.2	13.6	41.2	30.8	12.7	11	18.3	2.66	122	12.6	18.9	17	16.2	C00344	-	-	-	-	-	-	ko00564,ko01100
LIPID-N-1173	PG(16:0_18:3)	GP	PG	34	3	743.4863155	744.4941355	[M-H]-	C40H73O10P	93.6	59.3	84.5	80.2	419	235	95	60.3	110	21.9	735	192	114	107	125	C00344	HMDB0010660	LMGP04010372	52926637	-	-	-	ko00564,ko01100
LIPID-N-1174	PG(16:1_18:2)	GP	PG	34	3	743.4863155	744.4941355	[M-H]-	C40H73O10P	38.6	57	49	55.7	128	74.6	43.4	34.7	67.1	12	304	57.7	51.5	43.5	40.1	C00344	HMDB0010590	LMGP04010901	52927166	-	-	-	ko00564,ko01100
LIPID-N-1175	PG(18:0_16:3)	GP	PG	34	3	743.4863155	744.4941355	[M-H]-	C40H73O10P	2.82	2.26	2.16	4.28	13.1	6.67	3.58	1.3	2.56	0.445	22.9	3.41	3.78	3.39	3.65	C00344	-	-	-	-	-	-	ko00564,ko01100
LIPID-N-1176	PG(17:1_18:2)	GP	PG	35	3	757.5019656	758.5097856	[M-H]-	C41H75O10P	4.55	6.5	8.09	10.9	23.2	15.2	8.63	4.36	8.94	1.39	47	7.79	8.13	7.04	6.85	C00344	-	LMGP04010260	52926525	-	-	-	ko00564,ko01100
LIPID-N-1178	PG(20:1_18:2)	GP	PG	38	3	799.5489158	800.5567358	[M-H]-	C44H81O10P	3.91	2.69	2.44	2.89	3.44	5.98	3.47	3.27	5.57	0.914	27.2	3.17	2.76	3.98	2.4	C00344	HMDB0116576	LMGP04010541	52926806	-	-	-	ko00564,ko01100
LIPID-N-1199	PG(22:1_20:3)	GP	PG	42	4	853.595866	854.603686	[M-H]-	C48H87O10P	1.06	1.13	1.03	1.88	3.86	2.56	0.975	1.79	1.75	0.36	6.41	2.19	1.65	1.7	1.32	C00344	-	LMGP04010616	52926881	-	-	-	ko00564,ko01100
LIPID-N-1183	PG(22:1_18:2)	GP	PG	40	3	827.5802159	828.5880359	[M-H]-	C46H85O10P	3.21	2.18	2.5	4.91	10.8	8.56	4.11	2.01	4.85	0.721	24.2	6.82	4.52	4.69	3.68	C00344	-	LMGP04010363	52926628	-	-	-	ko00564,ko01100
LIPID-N-1187	PG(16:1_18:3)	GP	PG	34	4	741.4706655	742.4784855	[M-H]-	C40H71O10P	22.1	12	15.9	19.6	53.4	42.5	13	12.5	29.5	4.58	147	27.1	23.9	20.1	14.8	C00344	HMDB0010591	LMGP04010212	52926477	-	-	-	ko00564,ko01100
LIPID-N-1188	PG(16:1_20:3)	GP	PG	36	4	769.5019656	770.5097856	[M-H]-	C42H75O10P	67.6	65.5	80	87	187	157	44.3	104	117	20.9	346	132	94.6	69.3	78.8	C00344	HMDB0010594	LMGP04010219	52926484	-	-	-	ko00564,ko01100
LIPID-N-1191	PG(18:2_20:2)	GP	PG	38	4	797.5332657	798.5410857	[M-H]-	C44H79O10P	47.8	5.36	6.54	7.54	19	10.6	5.59	19.6	9.86	4.92	168	8.06	18.9	17.5	14.2	C00344	-	LMGP04010358	52926623	-	-	-	ko00564,ko01100
LIPID-N-1192	PG(18:2_21:2)	GP	PG	39	4	811.5489158	812.5567358	[M-H]-	C45H81O10P	17.7	11.1	16.6	22.3	62.7	52.4	17.9	11.2	23.9	2.63	133	24.6	22.3	18.9	20.4	C00344	-	-	-	-	-	-	ko00564,ko01100
LIPID-N-1195	PG(18:2_22:2)	GP	PG	40	4	825.5645659	826.5723859	[M-H]-	C46H83O10P	3.22	3.09	4.33	5.36	9.85	6.25	4.25	1.89	5.35	0.994	17.6	3.55	3.78	2.62	2.69	C00344	-	LMGP04010364	52926629	-	-	-	ko00564,ko01100
LIPID-N-1196	PG(20:0_20:4)	GP	PG	40	4	825.5645659	826.5723859	[M-H]-	C46H83O10P	8.63	8.65	11.6	8.53	32.3	20.8	9.1	6.18	14.5	1.22	112	8.7	10.2	9.94	9.56	C00344	-	LMGP04010638	52926903	-	-	-	ko00564,ko01100
LIPID-N-1185	PG(22:0_20:3)	GP	PG	42	3	855.6115161	856.6193361	[M-H]-	C48H89O10P	2.7	4.39	7.14	19.8	20.6	12.1	6.52	3.66	9.77	0.815	19	9.2	6.27	3.87	5.43	C00344	-	LMGP04010615	52926880	-	-	-	ko00564,ko01100
LIPID-N-1224	PG(22:5_22:6)	GP	PG	44	11	867.5176157	868.5254357	[M-H]-	C50H77O10P	712	6.11	14.8	19.1	65.4	53.4	28.8	155	171	36.2	374	28.6	101	114	98.4	C00344	-	-	-	-	-	-	ko00564,ko01100
LIPID-N-1223	PG(20:4_22:6)	GP	PG	42	10	841.5019656	842.5097856	[M-H]-	C48H75O10P	476	5.01	7.95	9.1	83.2	44.1	17.3	54	56.1	11.8	1330	101	141	138	131	C00344	HMDB0116742	LMGP04010839	52927104	-	-	-	ko00564,ko01100
LIPID-N-0444	PG(18:2_16:0)	GP	PG	34	2	745.509789	746.509787	[M-H]-	C40H75O10P	80.6	23.9	31.6	37.4	129	130	41.4	56.1	68.5	11.5	97	104	56.4	62.2	48.8	C00344	HMDB0010645	LMGP04010877	52927142	-	-	-	ko00564,ko01100
LIPID-N-0433	PG(18:0_16:0)	GP	PG	34	0	749.541089	750.541087	[M-H]-	C40H79O10P	3.82	0.466	0.821	0.825	1.58	2.67	0.788	4.41	2.51	0.773	8.74	3.48	2.35	2.39	2.03	C00344	HMDB0010600	LMGP04010888	52927153	-	-	-	ko00564,ko01100
LIPID-N-0435	PG(18:0_18:0)	GP	PG	36	0	777.57709	778.572387	[M-H]-	C42H83O10P	0.25	0.2205	0.2225	0.229	1.25	0.4245	0.2285	0.2365	0.3415	0.0755	2.3	0.466	0.291	0.2205	0.3705	C00344	HMDB0010602	LMGP04010038	24779552	-	-	-	ko00564,ko01100
LIPID-N-0436	PG(16:0_16:1)	GP	PG	32	1	719.494139	720.494137	[M-H]-	C38H73O10P	25.3	9.27	6.33	6.78	17.2	19.8	7.53	26.8	11.8	5.5	17.1	13.5	13.4	13	12.8	C00344	HMDB0010571	LMGP04010910	52927174	-	-	-	ko00564,ko01100
LIPID-N-0437	PG(18:1_14:0)	GP	PG	32	1	719.494139	720.494137	[M-H]-	C38H73O10P	4.06	3.23	3.37	5.29	11.3	12.1	5.9	3.98	7.84	0.92	9.95	6.63	5.93	5.32	4.66	C00344	-	LMGP04010882	-	-	460605	-	ko00564,ko01100
LIPID-N-0438	PG(16:0_18:1)	GP	PG	34	1	747.525439	748.525437	[M-H]-	C40H77O10P	392	241	252	295	758	755	323	313	415	56	2210	696	400	463	382	C00344	-	LMGP04010002	5283509	-	-	-	ko00564,ko01100
LIPID-N-0439	PG(17:0_18:1)	GP	PG	35	1	761.52203	762.541087	[M-H]-	C41H79O10P	25.4	14.3	22	30	67.3	53.4	31.2	20.8	31.6	4.36	154	44.1	37.7	36.3	32.4	C00344	-	LMGP04010893	-	-	-	-	ko00564,ko01100
LIPID-N-0440	PG(18:0_18:1)	GP	PG	36	1	775.556739	776.556737	[M-H]-	C42H81O10P	83.7	20.5	23.4	29.8	99.7	82.2	22.9	128	85.6	17.4	483	81.5	91.9	82.2	80.2	C00344	HMDB0010604	LMGP04010037	24779551	-	460605	-	ko00564,ko01100
LIPID-N-0441	PG(16:1_16:1)	GP	PG	32	2	717.478489	718.478487	[M-H]-	C38H71O10P	2.59	3.09	1.86	1.55	4.28	3.61	1.28	2.25	2.76	N/A	4.44	2.69	2.63	2.16	3.15	C00344	HMDB0010586	LMGP04010967	52927230	-	460605	-	ko00564,ko01100
LIPID-N-0442	PG(18:1_16:1)	GP	PG	34	2	745.509789	746.509787	[M-H]-	C40H75O10P	971	232	189	240	664	303	219	512	291	122	3960	301	513	534	459	C00344	HMDB0010631	LMGP04010881	52927146	-	460605	-	ko00564,ko01100
LIPID-N-0468	PG(20:3_22:6)	GP	PG	42	9	843.51331	844.525437	[M-H]-	C48H77O10P	108	3.06	3.16	6.92	23.5	15.6	8.05	28.9	21.8	6.42	214	14.8	24	25.8	24.2	C00344	-	LMGP04010619	52926884	-	-	-	ko00564,ko01100
LIPID-N-0446	PG(18:1_18:1)	GP	PG	36	2	773.541089	774.541087	[M-H]-	C42H79O10P	128.5	28.95	23.65	32.25	96.5	57.5	28.4	160	88	18.25	123.5	73.5	73.5	78.5	65.5	C00344	-	LMGP04010033	-	-	460605	-	ko00564,ko01100
LIPID-N-0467	PG(20:2_22:6)	GP	PG	42	8	845.51038	846.541087	[M-H]-	C48H79O10P	183	11.7	9.24	19.2	51.2	28.2	25.3	59.7	38	14.5	260	19.4	39	43	40.5	C00344	-	LMGP04010588	52926853	-	-	-	ko00564,ko01100
LIPID-N-0447	PG(18:0_18:2)	GP	PG	36	2	773.541089	774.541087	[M-H]-	C42H79O10P	139	23.7	51.7	66.3	215	157	40.2	135	123	25.9	408	80.8	102	85.1	97.7	C00344	HMDB0010605	LMGP04010982	52927245	-	-	-	ko00564,ko01100
LIPID-N-0432	PG(16:0_16:0)	GP	PG	32	0	721.509789	722.509787	[M-H]-	C38H75O10P	9.45	2.595	1.615	3.7	5.15	7.4	2.305	8.05	4.21	3.225	26.3	9.05	4.265	4.76	5.55	C00344	HMDB0010570	LMGP04010986	446440	-	460605	-	ko00564,ko01100
LIPID-N-0449	PG(20:1_18:1)	GP	PG	38	2	801.572389	802.572387	[M-H]-	C44H83O10P	8.26	8.58	6.1	7.7	13.1	9.15	6.42	12.4	12.3	3.53	140	5.65	9.99	9.33	9.73	C00344	-	LMGP04010540	52926805	-	-	-	ko00564,ko01100
LIPID-N-0451	PG(18:2_18:1)	GP	PG	36	3	771.525439	772.525437	[M-H]-	C42H77O10P	40.2	15.3	14.7	18.6	73.1	59	21.4	46.7	42	3.69	52.1	37.5	25.8	14.3	23	C00344	HMDB0010649	LMGP04010350	52926615	-	460605	-	ko00564,ko01100
LIPID-N-0452	PG(18:1_20:2)	GP	PG	38	3	799.556739	800.556737	[M-H]-	C44H81O10P	3.9	1.17	1.86	2.15	4.35	2.85	0.699	5.73	3.47	0.411	13.6	1.42	4.14	2.53	2.7	C00344	-	LMGP04010357	52926622	-	-	-	ko00564,ko01100
LIPID-N-0453	PG(18:2_18:2)	GP	PG	36	4	769.509789	770.509787	[M-H]-	C42H75O10P	14.6	6.95	11.55	8.05	34.7	61	18.6	7.5	22.65	0.565	46.85	37.85	21.3	19.9	20.4	C00344	HMDB0010650	LMGP04010956	52927219	-	460605	-	ko00564,ko01100
LIPID-N-0454	PG(16:0_20:4)	GP	PG	36	4	769.509789	770.509787	[M-H]-	C42H75O10P	28.6	4.07	3.52	6.83	15	16	6.1	20.3	17.6	2.13	51.3	13.3	13.8	11.8	12.5	C00344	HMDB0010580	LMGP04010036	24779550	-	-	-	ko00564,ko01100
LIPID-N-0466	PG(18:2_22:6)	GP	PG	40	8	817.509789	818.509787	[M-H]-	C46H75O10P	241	7.24	11	13.1	81.5	51.3	25.1	40.3	36.1	11.6	593	34.9	69.4	70.7	64.1	C00344	HMDB0010659	LMGP04010045	52926310	-	460605	-	ko00564,ko01100
LIPID-N-0465	PG(18:1_22:6)	GP	PG	40	7	819.525439	820.525437	[M-H]-	C46H77O10P	1250	101	121	218	779	475	284	424	406	116	3060	295	409	484	394	C00344	HMDB0010644	LMGP04010043	52926308	-	460605	-	ko00564,ko01100
LIPID-N-0463	PG(18:1_22:5)	GP	PG	40	6	821.541089	822.541087	[M-H]-	C46H79O10P	1960	124	204	231	576	450	205	710	576	202	2720	223	546	537	444	C00344	-	-	-	-	-	-	ko00564,ko01100
LIPID-N-0462	PG(18:0_22:6)	GP	PG	40	6	821.541089	822.541087	[M-H]-	C46H79O10P	65.4	4.02	7.19	17.1	54	53.6	20.8	19.9	23.1	4.14	309	22.8	38.5	40.5	33.1	C00344	-	LMGP04010581	52926846	-	-	-	ko00564,ko01100
LIPID-N-0461	PG(16:0_22:6)	GP	PG	38	6	793.509789	794.509787	[M-H]-	C44H75O10P	184	5.45	5.6	11.6	35.3	34.9	11.7	47.1	31.4	12.6	305	25.8	42.3	42.7	38.7	C00344	HMDB0010584	LMGP04010041	52926307	-	-	-	ko00564,ko01100
LIPID-N-0460	PG(18:1_20:5)	GP	PG	38	6	793.509789	794.509787	[M-H]-	C44H75O10P	43.4	3.69	5.23	5.64	31.4	15.8	8.59	10.2	11.4	1.85	682	17.3	34.6	32.7	31.9	C00344	-	LMGP04010878	52927143	-	-	-	ko00564,ko01100
LIPID-N-0459	PG(18:1_20:4)	GP	PG	38	5	795.525439	796.525437	[M-H]-	C44H77O10P	543	40.7	69.7	70.8	259	194	89.3	182	149	41.2	3470	284	281	293	266	C00344	HMDB0010640	LMGP04010879	52927144	-	460605	-	ko00564,ko01100
LIPID-N-0458	PG(16:1_20:4)	GP	PG	36	5	767.494139	768.494137	[M-H]-	C42H73O10P	59.6	2.4	1.81	1.82	13.3	7.34	2.58	11.4	3.52	2.61	317	11.6	25.5	27.3	24.4	C00344	HMDB0010595	LMGP04010899	52927164	-	460605	-	ko00564,ko01100
LIPID-N-0457	PG(18:2_18:3)	GP	PG	36	5	767.494139	768.494137	[M-H]-	C42H73O10P	35.6	0.925	1.75	2.26	7.91	5.39	2.31	4.91	3.78	1.6	122	3.18	11	12.9	11.3	C00344	HMDB0010651	LMGP04010351	52926616	-	-	-	ko00564,ko01100
LIPID-N-0450	PG(18:2_16:1)	GP	PG	34	3	743.494139	744.494137	[M-H]-	C40H73O10P	5.67	4.75	4.31	4.8	14	18.6	6.02	7.28	7.45	0.811	11.8	11.3	6.37	5.66	6.47	C00344	HMDB0010646	LMGP04010346	52926611	-	460605	-	ko00564,ko01100
LIPID-N-0455	PG(18:0_20:4)	GP	PG	38	4	797.541089	798.541087	[M-H]-	C44H79O10P	35.7	5.18	4.68	7.45	17.4	19.5	6.03	29	24.1	2.15	29.7	10.5	20.5	14.6	17	C00344	HMDB0010610	LMGP04010039	24779553	-	460605	-	ko00564,ko01100
LIPID-N-1407	PI(15:0_19:2)	GP	PI	34	2	833.5180096	834.5258296	[M-H]-	C43H79O13P	55	78.4	69.8	32.4	55	70.6	46.8	38.2	65.6	19.64	984	120.2	84.4	65.4	66.6	C01194	-	-	-	-	-	-	ko00562,ko00563,ko00564,ko01100,ko04070,ko04136,ko04140,ko05132,ko05152
LIPID-N-1434	PI(16:1_22:3)	GP	PI	38	4	885.5493097	886.5571297	[M-H]-	C47H83O13P	9.34	7.16	12.48	8.44	14.98	24	8.48	8.92	14.14	4.26	141	18.16	8.92	9.74	7.12	C01194	-	-	-	-	-	-	ko00562,ko00563,ko00564,ko01100,ko04070,ko04136,ko04140,ko05132,ko05152
LIPID-N-1435	PI(17:2_21:2)	GP	PI	38	4	885.5493097	886.5571297	[M-H]-	C47H83O13P	9.34	8.22	10.2	4.54	14.68	15.86	9.24	2.76	9.32	1.524	36.6	14.52	5.92	7.82	7	C01194	-	-	-	-	-	-	ko00562,ko00563,ko00564,ko01100,ko04070,ko04136,ko04140,ko05132,ko05152
LIPID-N-1436	PI(18:1_20:3)	GP	PI	38	4	885.5493097	886.5571297	[M-H]-	C47H83O13P	710	1490	1918	1768	1696	1020	1178	832	1598	294	1830	1482	1254	1302	1424	C01194	HMDB0009843	LMGP06010303	52927756	-	-	-	ko00562,ko00563,ko00564,ko01100,ko04070,ko04136,ko04140,ko05132,ko05152
LIPID-N-1438	PI(20:1_20:3)	GP	PI	40	4	913.5806099	914.5884299	[M-H]-	C49H87O13P	12.4	24.2	26.8	18.9	15.14	16.16	7.86	17.7	20.4	5.16	37.6	25	21	15.5	17.48	C01194	-	LMGP06010517	52927970	-	-	-	ko00562,ko00563,ko00564,ko01100,ko04070,ko04136,ko04140,ko05132,ko05152
LIPID-N-1439	PI(15:1_20:4)	GP	PI	35	5	841.4867095	842.4945295	[M-H]-	C44H75O13P	2100	12.64	26.2	22.4	87.4	111	54	87	119.6	38.4	12200	534	276	304	332	C01194	-	LMGP06010152	52927605	-	-	-	ko00562,ko00563,ko00564,ko01100,ko04070,ko04136,ko04140,ko05132,ko05152
LIPID-N-1440	PI(15:1_22:4)	GP	PI	37	5	869.5180096	870.5258296	[M-H]-	C46H79O13P	502	5.16	8.06	13.7	22.8	48.4	28.4	44	56	11.78	2900	118.6	62.8	73.6	67.6	C01194	-	LMGP06010158	52927611	-	-	-	ko00562,ko00563,ko00564,ko01100,ko04070,ko04136,ko04140,ko05132,ko05152
LIPID-N-1441	PI(18:1_20:4)	GP	PI	38	5	883.5336597	884.5414797	[M-H]-	C47H81O13P	1974	2680	3720	2260	4480	3860	4080	1238	2780	544	8740	4760	2620	2920	3000	C01194	HMDB0009896	LMGP06010599	52928052	-	-	-	ko00562,ko00563,ko00564,ko01100,ko04070,ko04136,ko04140,ko05132,ko05152
LIPID-N-1442	PI(19:1_20:4)	GP	PI	39	5	897.5493097	898.5571297	[M-H]-	C48H83O13P	20.2	36.4	53	19.36	49.4	43.6	47.4	14.72	25.4	6.36	67.8	36.2	34.8	21.8	34.2	C01194	-	LMGP06010471	52927924	-	-	-	ko00562,ko00563,ko00564,ko01100,ko04070,ko04136,ko04140,ko05132,ko05152
LIPID-N-1443	PI(21:1_20:4)	GP	PI	41	5	925.5806099	926.5884299	[M-H]-	C50H87O13P	4.2	2.76	3.4	3.9	3.86	6.22	4.18	2.04	3.64	1.412	42	N/A	2.32	3.88	3.48	C01194	-	-	-	-	-	-	ko00562,ko00563,ko00564,ko01100,ko04070,ko04136,ko04140,ko05132,ko05152
LIPID-N-1391	PI(16:0_17:1)	GP	PI	33	1	821.5180096	822.5258296	[M-H]-	C42H79O13P	13.34	12.46	5.6	9.06	10.46	15.88	16.76	5.08	9.58	N/A	202	51.8	8.74	12.44	12.34	C01194	-	LMGP06010222	52927675	-	-	-	ko00562,ko00563,ko00564,ko01100,ko04070,ko04136,ko04140,ko05132,ko05152
LIPID-N-1389	PI(15:0_17:1)	GP	PI	32	1	807.5023595	808.5101795	[M-H]-	C41H77O13P	6.88	11.38	5.56	4.52	4.34	3.84	4.94	6.62	11.22	2.3	96.6	5.8	8.16	7.3	9.9	C01194	-	LMGP06010111	52927564	-	-	-	ko00562,ko00563,ko00564,ko01100,ko04070,ko04136,ko04140,ko05132,ko05152
LIPID-N-1386	PI(12:0_18:1)	GP	PI	30	1	779.4710594	780.4788794	[M-H]-	C39H73O13P	210	104.2	104.2	95	63.6	127.8	105.2	64	77.6	144.6	558	218	88.2	96.4	91	C01194	-	LMGP06010290	52927743	-	-	-	ko00562,ko00563,ko00564,ko01100,ko04070,ko04136,ko04140,ko05132,ko05152
LIPID-N-1382	PI(15:0_21:0)	GP	PI	36	0	865.5806099	866.5884299	[M-H]-	C45H87O13P	13.36	8.52	7.8	5.84	4.76	14.42	5.92	6.7	11.8	3.42	153	24.2	9.98	9.06	11.5	C01194	-	LMGP06010647	52928100	-	-	-	ko00562,ko00563,ko00564,ko01100,ko04070,ko04136,ko04140,ko05132,ko05152
LIPID-N-1381	PI(17:0_18:0)	GP	PI	35	0	851.5649598	852.5727798	[M-H]-	C44H85O13P	244	63	107.8	81.2	139.2	388	105	47.8	169.4	21.6	2460	276	122.6	81.2	102.6	C01194	-	LMGP06010280	52927733	-	-	-	ko00562,ko00563,ko00564,ko01100,ko04070,ko04136,ko04140,ko05132,ko05152
LIPID-N-1380	PI(16:0_19:0)	GP	PI	35	0	851.5649598	852.5727798	[M-H]-	C44H85O13P	1034	294	344	428	564	1274	372	210	348	106.4	8600	1690	420	488	530	C01194	-	LMGP06010925	52928378	-	-	-	ko00562,ko00563,ko00564,ko01100,ko04070,ko04136,ko04140,ko05132,ko05152
LIPID-N-1379	PI(15:0_19:0)	GP	PI	34	0	837.5493097	838.5571297	[M-H]-	C43H83O13P	20.4	9.34	12.6	7.18	10.8	11.68	8.34	15.36	11.08	1.826	432	21.2	10.6	16.24	13.3	C01194	-	LMGP06010839	52928292	-	-	-	ko00562,ko00563,ko00564,ko01100,ko04070,ko04136,ko04140,ko05132,ko05152
LIPID-N-1378	PI(16:0_17:0)	GP	PI	33	0	823.5336597	824.5414797	[M-H]-	C42H81O13P	22.8	7.66	4.36	6.02	5.66	13.16	7.46	7.28	11.62	4.78	162.4	20.8	6.88	6.58	6.78	C01194	-	LMGP06010197	52927650	-	-	-	ko00562,ko00563,ko00564,ko01100,ko04070,ko04136,ko04140,ko05132,ko05152
LIPID-N-1375	PI(15:0_17:0)	GP	PI	32	0	809.5180096	810.5258296	[M-H]-	C41H79O13P	5.3	7.36	4.96	6.62	2.5	5.52	3.58	4.4	6.22	5.16	N/A	5.08	4.54	2.64	3.4	C01194	-	LMGP06010867	52928320	-	-	-	ko00562,ko00563,ko00564,ko01100,ko04070,ko04136,ko04140,ko05132,ko05152
LIPID-N-1374	PI(12:0_18:0)	GP	PI	30	0	781.4867095	782.4945295	[M-H]-	C39H75O13P	6.26	2.48	2.22	2.28	2.22	4.18	3.52	1.798	4.28	2.1	53.6	4.62	2.42	1.938	2.16	C01194	-	LMGP06010860	52928313	-	-	-	ko00562,ko00563,ko00564,ko01100,ko04070,ko04136,ko04140,ko05132,ko05152
LIPID-N-1433	PI(16:0_22:4)	GP	PI	38	4	885.5493097	886.5571297	[M-H]-	C47H83O13P	51	51.2	49.6	23.2	49.8	33.8	71.8	24	55.2	6.7	616	83.8	57.2	55.2	62.2	C01194	HMDB0009914	LMGP06010762	52928215	-	-	-	ko00562,ko00563,ko00564,ko01100,ko04070,ko04136,ko04140,ko05132,ko05152
LIPID-N-1411	PI(19:0_17:2)	GP	PI	36	2	861.5493097	862.5571297	[M-H]-	C45H83O13P	67.2	56.2	39.8	42	41.6	62.2	55.4	49.4	76.8	21.8	724	105	63.6	50.8	61.4	C01194	-	LMGP06010262	52927715	-	-	-	ko00562,ko00563,ko00564,ko01100,ko04070,ko04136,ko04140,ko05132,ko05152
LIPID-N-1432	PI(15:0_22:4)	GP	PI	37	4	871.5336597	872.5414797	[M-H]-	C46H81O13P	74.6	43.6	77	46.4	71.4	102.6	63.2	37.4	63	15.14	408	128.6	66	76.8	71.2	C01194	-	LMGP06010127	52927580	-	-	-	ko00562,ko00563,ko00564,ko01100,ko04070,ko04136,ko04140,ko05132,ko05152
LIPID-N-1429	PI(18:0_18:4)	GP	PI	36	4	857.5180096	858.5258296	[M-H]-	C45H79O13P	4.68	10.16	6.46	3.2	6.32	8.7	10.04	3.14	8.9	10.04	115.4	12.46	6.12	6.58	3.9	C01194	-	LMGP06010404	52927857	-	-	-	ko00562,ko00563,ko00564,ko01100,ko04070,ko04136,ko04140,ko05132,ko05152
LIPID-N-1406	PI(15:1_18:1)	GP	PI	33	2	819.5023595	820.5101795	[M-H]-	C42H77O13P	32600	1196	2240	2980	4700	6580	5100	4020	4660	2140	168400	8940	5700	5180	5860	C01194	-	LMGP06010141	52927594	-	-	-	ko00562,ko00563,ko00564,ko01100,ko04070,ko04136,ko04140,ko05132,ko05152
LIPID-N-1403	PI(15:1_16:1)	GP	PI	31	2	791.4710594	792.4788794	[M-H]-	C40H73O13P	3960	107.4	138	145.2	368	438	312	302	336	153	21400	900	598	662	728	C01194	-	LMGP06010136	52927589	-	-	-	ko00562,ko00563,ko00564,ko01100,ko04070,ko04136,ko04140,ko05132,ko05152
LIPID-N-1402	PI(13:1_18:1)	GP	PI	31	2	791.4710594	792.4788794	[M-H]-	C40H73O13P	145.8	108.2	145.6	143.8	99.6	102	155.2	83.6	133.8	54.6	880	224	156.4	158.2	182	C01194	-	-	-	-	-	-	ko00562,ko00563,ko00564,ko01100,ko04070,ko04136,ko04140,ko05132,ko05152
LIPID-N-1401	PI(13:0_18:2)	GP	PI	31	2	791.4710594	792.4788794	[M-H]-	C40H73O13P	105.2	49.2	88.4	76.2	118	228	93.8	19.08	79.4	9.02	928	214	73	73.2	70.2	C01194	-	LMGP06010046	52927499	-	-	-	ko00562,ko00563,ko00564,ko01100,ko04070,ko04136,ko04140,ko05132,ko05152
LIPID-N-1413	PI(19:0_19:2)	GP	PI	38	2	889.5806099	890.5884299	[M-H]-	C47H87O13P	6.98	16.22	14.46	27.2	23.6	21.8	17.64	10.14	13.24	4.2	24.6	19.54	17.22	17.98	13.9	C01194	-	-	-	-	-	-	ko00562,ko00563,ko00564,ko01100,ko04070,ko04136,ko04140,ko05132,ko05152
LIPID-N-1398	PI(19:0_17:1)	GP	PI	36	1	863.5649598	864.5727798	[M-H]-	C45H85O13P	13.22	11.68	12.48	10.24	10.34	12.38	6.18	12.22	23.2	2.94	218	36.8	16.22	18.2	18.9	C01194	-	LMGP06010232	52927685	-	-	-	ko00562,ko00563,ko00564,ko01100,ko04070,ko04136,ko04140,ko05132,ko05152
LIPID-N-1397	PI(15:0_21:1)	GP	PI	36	1	863.5649598	864.5727798	[M-H]-	C45H85O13P	97.8	84.8	77.8	61.4	62	101.8	47.2	65.8	115.2	20.4	1096	210	94.2	95.6	103.2	C01194	-	-	-	-	-	-	ko00562,ko00563,ko00564,ko01100,ko04070,ko04136,ko04140,ko05132,ko05152
LIPID-N-1396	PI(19:0_16:1)	GP	PI	35	1	849.5493097	850.5571297	[M-H]-	C44H83O13P	38	19.34	34.4	30.6	41.6	58.2	41	11.24	24	3.96	974	58.4	19.8	27	27.8	C01194	-	LMGP06010182	52927635	-	-	-	ko00562,ko00563,ko00564,ko01100,ko04070,ko04136,ko04140,ko05132,ko05152
LIPID-N-1395	PI(16:0_19:1)	GP	PI	35	1	849.5493097	850.5571297	[M-H]-	C44H83O13P	96.8	5.5	15.18	13.48	11.1	16.88	13.06	24.4	44	12.08	464	22.6	10.38	18.68	16.52	C01194	-	LMGP06010164	52927617	-	-	-	ko00562,ko00563,ko00564,ko01100,ko04070,ko04136,ko04140,ko05132,ko05152
LIPID-N-1394	PI(15:0_20:1)	GP	PI	35	1	849.5493097	850.5571297	[M-H]-	C44H83O13P	8.16	5.84	4.94	4.58	4.48	9.64	8.06	4.46	8.48	3.72	125.4	9.54	4.94	4.28	5.48	C01194	-	LMGP06010119	52927572	-	-	-	ko00562,ko00563,ko00564,ko01100,ko04070,ko04136,ko04140,ko05132,ko05152
LIPID-N-1393	PI(19:0_15:1)	GP	PI	34	1	835.5336597	836.5414797	[M-H]-	C43H81O13P	41.6	18.98	14.76	8.28	12.56	9.92	18.66	18.52	31	6.38	696	43.4	23.8	31.8	26.8	C01194	-	LMGP06010146	52927599	-	-	-	ko00562,ko00563,ko00564,ko01100,ko04070,ko04136,ko04140,ko05132,ko05152
LIPID-N-1392	PI(15:0_19:1)	GP	PI	34	1	835.5336597	836.5414797	[M-H]-	C43H81O13P	206	115.4	87.4	46	75.8	88	66	120	180.8	38.2	5460	212	151.2	168.8	149.8	C01194	-	LMGP06010117	52927570	-	-	-	ko00562,ko00563,ko00564,ko01100,ko04070,ko04136,ko04140,ko05132,ko05152
LIPID-N-1416	PI(16:0_18:3)	GP	PI	34	3	831.5023595	832.5101795	[M-H]-	C43H77O13P	123	53.2	52	52.2	43.4	164.2	68.4	39	63.8	66.8	1522	117	48.6	45.6	39.4	C01194	-	LMGP06010340	52927793	-	-	-	ko00562,ko00563,ko00564,ko01100,ko04070,ko04136,ko04140,ko05132,ko05152
LIPID-N-1419	PI(18:0_18:3)	GP	PI	36	3	859.5336597	860.5414797	[M-H]-	C45H81O13P	100	165.6	146.2	163	185.6	99.6	97.8	118.4	172	37.4	300	191.4	144.2	124	125.4	C01194	HMDB0009810	LMGP06010283	52927736	-	-	-	ko00562,ko00563,ko00564,ko01100,ko04070,ko04136,ko04140,ko05132,ko05152
LIPID-N-1422	PI(14:1_24:2)	GP	PI	38	3	887.5649598	888.5727798	[M-H]-	C47H85O13P	41.2	24.6	41.8	41	66.2	64.6	54.8	18.72	50	8.22	350	71.6	40.6	37.4	39.4	C01194	-	-	-	-	-	-	ko00562,ko00563,ko00564,ko01100,ko04070,ko04136,ko04140,ko05132,ko05152
LIPID-N-1423	PI(18:0_20:3)	GP	PI	38	3	887.5649598	888.5727798	[M-H]-	C47H85O13P	1402	788	1312	1226	2040	2520	1340	810	1590	280	7680	2740	1124	1362	1368	C01194	HMDB0009887	LMGP06010568	52928021	-	-	-	ko00562,ko00563,ko00564,ko01100,ko04070,ko04136,ko04140,ko05132,ko05152
LIPID-N-1426	PI(13:0_20:4)	GP	PI	33	4	815.4710594	816.4788794	[M-H]-	C42H73O13P	19.36	9.9	19.24	19.1	22.2	48.6	22.2	5.74	22	N/A	177	34	13.74	11.4	8.74	C01194	-	LMGP06010054	52927507	-	-	-	ko00562,ko00563,ko00564,ko01100,ko04070,ko04136,ko04140,ko05132,ko05152
LIPID-N-1427	PI(15:1_18:3)	GP	PI	33	4	815.4710594	816.4788794	[M-H]-	C42H73O13P	354	6.38	11.04	15.72	27.2	47.2	27.4	24.2	30.6	13.4	2200	60.4	53.6	55.4	63.2	C01194	-	LMGP06010143	52927596	-	-	-	ko00562,ko00563,ko00564,ko01100,ko04070,ko04136,ko04140,ko05132,ko05152
LIPID-N-1430	PI(18:1_18:3)	GP	PI	36	4	857.5180096	858.5258296	[M-H]-	C45H79O13P	65.8	35.4	20.6	18.06	24.6	26.2	31.4	19.4	18.56	8.96	840	37.4	25.8	31.4	28.6	C01194	HMDB0009839	LMGP06010298	52927751	-	-	-	ko00562,ko00563,ko00564,ko01100,ko04070,ko04136,ko04140,ko05132,ko05152
LIPID-N-1399	PI(19:0_18:1)	GP	PI	37	1	877.5806099	878.5884299	[M-H]-	C46H87O13P	202	76.8	170.4	120.2	222	378	128.6	48.4	108.4	12.78	2820	280	106.4	106.6	173.4	C01194	-	LMGP06010300	52927753	-	-	-	ko00562,ko00563,ko00564,ko01100,ko04070,ko04136,ko04140,ko05132,ko05152
LIPID-N-0469	PI(16:0_18:0)	GP	PI	34	0	837.557134	838.557132	[M-H]-	C43H83O13P	28.2	20.8	11.42	9.7	11.76	10.72	9.28	21.2	25.6	3.06	968	31.6	26.4	25.8	23.4	C01194	HMDB0009781	LMGP06010878	52928331	182509-29-1	-	-	ko00562,ko00563,ko00564,ko01100,ko04070,ko04136,ko04140,ko05132,ko05152
LIPID-N-0503	PI(18:1_20:1)	GP	PI	38	2	889.588434	890.588432	[M-H]-	C47H87O13P	14.28	24	17.16	9.14	7.86	12.96	17.94	12.38	21.2	3.02	80.2	17.68	15.16	15.32	13.06	C01194	HMDB0009871	LMGP06010508	52927961	-	-	-	ko00562,ko00563,ko00564,ko01100,ko04070,ko04136,ko04140,ko05132,ko05152
LIPID-N-0506	PI(18:3_16:0)	GP	PI	34	3	831.510184	832.510182	[M-H]-	C43H77O13P	9.52	13.68	7.58	4.02	8.7	5.74	6.54	6.18	11.72	5.54	49.2	9.5	9.26	6.6	7.44	C01194	-	LMGP06010340	52927793	-	-	-	ko00562,ko00563,ko00564,ko01100,ko04070,ko04136,ko04140,ko05132,ko05152
LIPID-N-0508	PI(18:1_18:2)	GP	PI	36	3	859.541484	860.541482	[M-H]-	C45H81O13P	328	196.8	242	138.2	232	226	224	176.2	218	86.8	2000	380	183.2	188.2	224	C01194	HMDB0009838	LMGP06010931	52928384	-	-	-	ko00562,ko00563,ko00564,ko01100,ko04070,ko04136,ko04140,ko05132,ko05152
LIPID-N-0509	PI(16:0_20:3)	GP	PI	36	3	859.541484	860.541482	[M-H]-	C45H81O13P	594	960	926	1042	1084	978	832	760	1186	193	4020	1352	994	960	994	C01194	HMDB0009788	LMGP06010875	52928328	-	-	-	ko00562,ko00563,ko00564,ko01100,ko04070,ko04136,ko04140,ko05132,ko05152
LIPID-N-0511	PI(17:0_20:3)	GP	PI	37	3	873.549308	874.557132	[M-H]-	C46H83O13P	50.8	71.6	95.2	126.4	152.2	102.8	67.8	72.2	115	18.3	300	121	123.8	72.4	104.8	C01194	-	LMGP06010209	52927662	-	-	-	ko00562,ko00563,ko00564,ko01100,ko04070,ko04136,ko04140,ko05132,ko05152
LIPID-N-0514	PI(20:3_18:0)	GP	PI	38	3	887.572784	888.572782	[M-H]-	C47H85O13P	4140	4880	6900	9500	8920	8020	3760	5200	7120	2400	11540	10920	6160	6400	6880	C01194	HMDB0009880	LMGP06010568	53480094	-	-	-	ko00562,ko00563,ko00564,ko01100,ko04070,ko04136,ko04140,ko05132,ko05152
LIPID-N-0515	PI(18:1_20:2)	GP	PI	38	3	887.572784	888.572782	[M-H]-	C47H85O13P	96.6	226	170.2	183.8	123	89.2	183.6	100.2	161	30.8	142.4	140.8	150.2	121.4	132.2	C01194	-	LMGP06010302	52927755	-	-	-	ko00562,ko00563,ko00564,ko01100,ko04070,ko04136,ko04140,ko05132,ko05152
LIPID-N-0505	PI(18:2_16:1)	GP	PI	34	3	831.510184	834.525832	[M-H]-	C43H77O13P	54	5.02	4.04	4.32	7.48	N/A	N/A	8.24	7.2	5.88	220	13.84	7.62	6.6	8.48	C01194	-	LMGP06010314	52927767	-	-	-	ko00562,ko00563,ko00564,ko01100,ko04070,ko04136,ko04140,ko05132,ko05152
LIPID-N-0519	PI(18:0_22:3)	GP	PI	40	3	915.604084	916.604082	[M-H]-	C49H89O13P	29.6	47.4	49	51.4	52.4	34.6	32.2	50.6	65	14.84	49.8	54.4	41.8	36	42	C01194	-	-	-	-	-	-	ko00562,ko00563,ko00564,ko01100,ko04070,ko04136,ko04140,ko05132,ko05152
LIPID-N-0521	PI(18:2_18:2)	GP	PI	36	4	857.525834	858.525832	[M-H]-	C45H79O13P	26.1	9.21	4.93	4.02	6.38	N/A	7.28	4	5.84	2.3	118	11.8	6.37	6.43	5.13	C01194	HMDB0009850	LMGP06010927	52928380	182509-36-0	-	-	ko00562,ko00563,ko00564,ko01100,ko04070,ko04136,ko04140,ko05132,ko05152
LIPID-N-0522	PI(16:0_20:4)	GP	PI	36	4	857.525834	858.525832	[M-H]-	C45H79O13P	1200	1110	1310	846	1914	2200	1778	664	1204	248	12640	2500	1246	1452	1440	C01194	HMDB0009789	LMGP06010958	52928411	88587-97-7	-	-	ko00562,ko00563,ko00564,ko01100,ko04070,ko04136,ko04140,ko05132,ko05152
LIPID-N-0523	PI(17:0_20.4)	GP	PI	37	4	871.53424	872.541482	[M-H]-	C46H81O13P	146.4	92.6	148.8	125	272	294	174.2	87.6	181.6	36.2	960	226	145.2	175.8	140.6	C01194	-	LMGP06010004	9547141	-	-	-	ko00562,ko00563,ko00564,ko01100,ko04070,ko04136,ko04140,ko05132,ko05152
LIPID-N-0524	PI(18:0_20:4)	GP	PI	38	4	885.557134	886.557132	[M-H]-	C47H83O13P	20800	11140	18060	18160	26200	29400	20600	10160	21800	4240	108800	36200	18440	16600	19020	C01194	HMDB0009815	LMGP06010010	42607491	206059-96-3	-	-	ko00562,ko00563,ko00564,ko01100,ko04070,ko04136,ko04140,ko05132,ko05152
LIPID-N-0527	PI(19:1_20:3)	GP	PI	39	4	899.564957	900.5728	[M-H]-	C48H85O13P	7.04	15.06	10.32	15.58	11.46	6.7	6.6	8.26	8.94	1.774	N/A	23.4	10.5	9.74	9.68	C01194	-	LMGP06010470	52927923	-	-	-	ko00562,ko00563,ko00564,ko01100,ko04070,ko04136,ko04140,ko05132,ko05152
LIPID-N-0528	PI(19:0_20:4)	GP	PI	39	4	899.564957	900.5728	[M-H]-	C48H85O13P	19.76	15.86	36.2	8.98	11.36	8.9	28.2	7.92	16.18	2.88	N/A	6.76	12.9	9.6	17.1	C01194	-	LMGP06010471	52927924	-	-	-	ko00562,ko00563,ko00564,ko01100,ko04070,ko04136,ko04140,ko05132,ko05152
LIPID-N-0520	PI(15:0_20:4)	GP	PI	35	4	843.50732	844.510182	[M-H]-	C44H77O13P	170.8	1.174	2.7	2.08	2.68	12.98	4.72	14.98	12.1	4.7	474	11.28	12.4	10.68	14.88	C01194	-	LMGP06010122	52927575	-	-	-	ko00562,ko00563,ko00564,ko01100,ko04070,ko04136,ko04140,ko05132,ko05152
LIPID-N-0529	PI(18:0_22:4)	GP	PI	40	4	913.588434	914.588432	[M-H]-	C49H87O13P	123	141.6	164.6	117.4	192.4	142	173.8	110.2	157.8	24.8	482	222	145.2	127.8	142.8	C01194	HMDB0009817	LMGP06010853	53480065	-	-	-	ko00562,ko00563,ko00564,ko01100,ko04070,ko04136,ko04140,ko05132,ko05152
LIPID-N-0504	PI(18:0_22:2)	GP	PI	40	2	917.60541	918.619732	[M-H]-	C49H91O13P	N/A	4.8	2.04	6.3	3.28	3.94	3.9	5.28	4.24	1.858	N/A	6.56	3.8	3.28	3.76	C01194	-	LMGP06010289	52927742	-	-	-	ko00562,ko00563,ko00564,ko01100,ko04070,ko04136,ko04140,ko05132,ko05152
LIPID-N-0499	PI(18:0_19:2)	GP	PI	37	2	875.564957	876.572782	[M-H]-	C46H85O13P	N/A	15.82	25.4	35	57.6	10.5	10.5	10.44	13.96	5.12	27.6	13.76	20.2	25.6	27.2	C01194	-	-	-	-	-	-	ko00562,ko00563,ko00564,ko01100,ko04070,ko04136,ko04140,ko05132,ko05152
LIPID-N-0491	PI(16:1_18:1)	GP	PI	34	2	833.525834	834.525832	[M-H]-	C43H79O13P	58.4	105	74.2	34.8	51.6	50.6	47	48.6	76.8	25.4	560	111.6	59.6	63.2	69.2	C01194	HMDB0009801	LMGP06010873	52928326	-	-	-	ko00562,ko00563,ko00564,ko01100,ko04070,ko04136,ko04140,ko05132,ko05152
LIPID-N-0490	PI(18:2_16:0)	GP	PI	34	2	833.525834	834.525832	[M-H]-	C43H79O13P	135.2	110.6	104.4	66.6	99.4	108.8	98.4	77.2	125.2	30.6	1650	200	118	105.6	119.6	C01194	HMDB0009846	LMGP06010847	52928300	-	-	-	ko00562,ko00563,ko00564,ko01100,ko04070,ko04136,ko04140,ko05132,ko05152
LIPID-N-0487	PI(18:0_20:1)	GP	PI	38	1	891.604084	892.604082	[M-H]-	C47H89O13P	2.9	4.8	3.38	2.5	1.856	N/A	3.16	1.582	2.88	N/A	N/A	4.5	2.5	2.26	2.66	C01194	-	LMGP06010935	52928388	-	-	-	ko00562,ko00563,ko00564,ko01100,ko04070,ko04136,ko04140,ko05132,ko05152
LIPID-N-0482	PI(18:0_18:1)	GP	PI	36	1	863.572784	864.572782	[M-H]-	C45H85O13P	244	212	179.6	159.6	162.2	163.4	121.2	177.8	290	53.8	3100	438	234	206	252	C01194	-	LMGP06010957	52928410	-	-	-	ko00562,ko00563,ko00564,ko01100,ko04070,ko04136,ko04140,ko05132,ko05152
LIPID-N-0480	PI(17:0_18:1)	GP	PI	35	1	849.549308	850.557132	[M-H]-	C44H83O13P	122.4	43.6	45.2	40.2	33.8	51	60.6	37.4	39.2	47.6	820	44	36.4	25.2	33.2	C01194	-	LMGP06010295	52927748	-	-	-	ko00562,ko00563,ko00564,ko01100,ko04070,ko04136,ko04140,ko05132,ko05152
LIPID-N-0479	PI(18:0_17:1)	GP	PI	35	1	849.549308	850.557132	[M-H]-	C44H83O13P	25.2	19.06	15.58	19.9	17.9	36.4	32	8.82	16.76	2.54	172.4	47.4	19.82	15.9	19.98	C01194	-	LMGP06010281	52927734	-	-	-	ko00562,ko00563,ko00564,ko01100,ko04070,ko04136,ko04140,ko05132,ko05152
LIPID-N-0502	PI(18:0_20:2)	GP	PI	38	2	889.588434	890.588432	[M-H]-	C47H87O13P	89.8	191.4	214	296	290	189.2	152.2	108.8	210	34.8	234	123.4	192.8	200	206	C01194	HMDB0009876	LMGP06010537	52927990	-	-	-	ko00562,ko00563,ko00564,ko01100,ko04070,ko04136,ko04140,ko05132,ko05152
LIPID-N-0478	PI(16:0_18:1)	GP	PI	34	1	835.541484	836.541482	[M-H]-	C43H81O13P	376	292	212	118.8	199.6	179.2	166.2	310	388	77.4	13900	400	350	330	360	C01194	HMDB0009782	LMGP06010001	53480051	-	-	-	ko00562,ko00563,ko00564,ko01100,ko04070,ko04136,ko04140,ko05132,ko05152
LIPID-N-0474	PI(15:0_16:1)	GP	PI	31	1	793.495	794.494532	[M-H]-	C40H75O13P	1404	19.84	32	27.2	31.6	60	31.2	124.4	109.8	60.6	3100	57.4	104.2	112.2	118.8	C01194	-	LMGP06010173	52927626	-	-	-	ko00562,ko00563,ko00564,ko01100,ko04070,ko04136,ko04140,ko05132,ko05152
LIPID-N-0471	PI(18:0_18:0)	GP	PI	36	0	865.588434	866.588432	[M-H]-	C45H87O13P	10.7	5.79	8.92	7.18	5.11	6	5.62	6.18	12	3.83	173	21.2	9.69	8.05	10.9	C01194	HMDB0009808	LMGP06010008	42607490	-	-	-	ko00562,ko00563,ko00564,ko01100,ko04070,ko04136,ko04140,ko05132,ko05152
LIPID-N-0493	PI(17:1_18:1)	GP	PI	35	2	847.533658	848.541482	[M-H]-	C44H81O13P	19.92	14.58	17.62	10.8	15.22	20.4	15.46	4.88	16.7	4.88	316	33.2	11.66	13.4	12.6	C01194	-	LMGP06010227	52927680	-	-	-	ko00562,ko00563,ko00564,ko01100,ko04070,ko04136,ko04140,ko05132,ko05152
LIPID-N-0494	PI(17:0_18:2)	GP	PI	35	2	847.533658	848.541482	[M-H]-	C44H81O13P	11.52	8.48	7.32	10.62	6.14	22.4	16.16	3.98	15.7	N/A	119.8	22	12.44	10.2	11.1	C01194	-	LMGP06010201	52927654	-	-	-	ko00562,ko00563,ko00564,ko01100,ko04070,ko04136,ko04140,ko05132,ko05152
LIPID-N-0495	PI(18:0_18:2)	GP	PI	36	2	861.557134	862.557132	[M-H]-	C45H83O13P	326	208	342	167.2	220	368	252	131.8	320	64.6	2020	716	298	318	352	C01194	HMDB0009809	LMGP06010956	52928409	-	-	-	ko00562,ko00563,ko00564,ko01100,ko04070,ko04136,ko04140,ko05132,ko05152
LIPID-N-0496	PI(18:1_18:1)	GP	PI	36	2	861.557134	862.557132	[M-H]-	C45H83O13P	562	349	288	239	277	280	305	483	521	145	6860	631	436	379	452	C01194	-	-	-	-	-	-	ko00562,ko00563,ko00564,ko01100,ko04070,ko04136,ko04140,ko05132,ko05152
LIPID-N-0475	PI(16:0_16:1)	GP	PI	32	1	807.510184	808.510182	[M-H]-	C41H77O13P	44.4	55.6	46	24.2	40.4	26.6	41.2	30.2	51.8	10.78	540	77	48.2	41.6	37.2	C01194	HMDB0009779	LMGP06010881	52928334	-	-	-	ko00562,ko00563,ko00564,ko01100,ko04070,ko04136,ko04140,ko05132,ko05152
LIPID-N-0531	PI(18:1_22:3)	GP	PI	40	4	913.588434	914.588432	[M-H]-	C49H87O13P	28	27.6	33	36.8	27.2	23	22.2	20.2	30.6	5.2	54.4	39	21.8	32.8	27.4	C01194	-	-	-	-	-	-	ko00562,ko00563,ko00564,ko01100,ko04070,ko04136,ko04140,ko05132,ko05152
LIPID-N-0525	PI(20:3_18:1)	GP	PI	38	4	885.557134	886.557132	[M-H]-	C47H83O13P	696	1318	1402	1672	1826	1374	1046	868	1342	338	1908	1666	1216	1114	1150	C01194	HMDB0009881	LMGP06010569	53480095	-	-	-	ko00562,ko00563,ko00564,ko01100,ko04070,ko04136,ko04140,ko05132,ko05152
LIPID-N-0533	PI(20:4_16:1)	GP	PI	36	5	855.510184	856.510182	[M-H]-	C45H77O13P	13.96	11.38	20.8	13.94	22.4	20	21.6	7.32	14.04	2.12	123.4	17.56	12.42	17.6	18.66	C01194	-	LMGP06010594	52928047	-	-	-	ko00562,ko00563,ko00564,ko01100,ko04070,ko04136,ko04140,ko05132,ko05152
LIPID-N-0532	PI(18:2_18:3)	GP	PI	36	5	855.510184	856.510182	[M-H]-	C45H77O13P	15.76	8.06	10.52	20	9.7	34.6	14.26	5.36	15.2	1.842	236	41	10.32	9.14	8.72	C01194	-	LMGP06010319	52927772	-	-	-	ko00562,ko00563,ko00564,ko01100,ko04070,ko04136,ko04140,ko05132,ko05152
LIPID-N-0557	PI(20:4_20:4)	GP	PI	40	8	905.525834	906.525832	[M-H]-	C49H79O13P	18.2	6.19	9.03	9.89	15.3	19.1	11	5.22	9.93	2.18	76.3	32.3	11.9	13.1	11.4	C01194	-	LMGP06010827	52928280	-	-	-	ko00562,ko00563,ko00564,ko01100,ko04070,ko04136,ko04140,ko05132,ko05152
LIPID-N-0555	PI(20:3_20:4)	GP	PI	40	7	907.541484	908.541482	[M-H]-	C49H81O13P	16.38	4.98	11.36	11	9.88	13.38	7.4	4.84	9.76	N/A	123.8	19.68	8.26	9.68	12.36	C01194	-	-	-	-	-	-	ko00562,ko00563,ko00564,ko01100,ko04070,ko04136,ko04140,ko05132,ko05152
LIPID-N-0554	PI(16:1_22:6)	GP	PI	38	7	879.49902	880.510182	[M-H]-	C47H77O13P	11.42	N/A	N/A	2.82	1.944	5.54	5.54	2.9	4.3	1.914	71.6	10.08	3.44	3.8	4.6	C01194	-	LMGP06010792	52928245	-	-	-	ko00562,ko00563,ko00564,ko01100,ko04070,ko04136,ko04140,ko05132,ko05152
LIPID-N-0553	PI(18:1_22:5)	GP	PI	40	6	909.557134	910.557132	[M-H]-	C49H83O13P	31.2	33.2	40.6	19.66	17.96	22	20.8	19.04	41.8	10.7	N/A	24.6	22.4	22.4	27.4	C01194	-	-	-	-	-	-	ko00562,ko00563,ko00564,ko01100,ko04070,ko04136,ko04140,ko05132,ko05152
LIPID-N-0552	PI(20:2_20:4)	GP	PI	40	6	909.557134	910.557132	[M-H]-	C49H83O13P	20.4	11.46	15.8	9.48	10.96	8.42	8.84	7.34	11.48	4.44	N/A	10.4	14.26	12.16	11.18	C01194	-	LMGP06010549	52928002	-	-	-	ko00562,ko00563,ko00564,ko01100,ko04070,ko04136,ko04140,ko05132,ko05152
LIPID-N-0551	PI(18:0_22:6)	GP	PI	40	6	909.557134	910.557132	[M-H]-	C49H83O13P	278	89.8	109.4	73	120.6	148.8	146	162.8	256	31.2	480	266	132.6	138	149.6	C01194	HMDB0009821	LMGP06010012	52927465	-	-	-	ko00562,ko00563,ko00564,ko01100,ko04070,ko04136,ko04140,ko05132,ko05152
LIPID-N-0549	PI(18:1_20:5)	GP	PI	38	6	881.525834	882.525832	[M-H]-	C47H79O13P	32.4	18.62	23.2	26	44.8	39.2	52	8.7	19.12	8.92	386	59.2	27.6	34	33.6	C01194	-	LMGP06010826	52928279	-	-	-	ko00562,ko00563,ko00564,ko01100,ko04070,ko04136,ko04140,ko05132,ko05152
LIPID-N-0548	PI(16:0_22:6)	GP	PI	38	6	881.525834	882.525832	[M-H]-	C47H79O13P	82.6	22.8	21	7.58	22.4	27.6	24.6	41.4	45	13.68	199.4	56.8	28.2	23	27.4	C01194	-	LMGP06010011	52927464	-	-	-	ko00562,ko00563,ko00564,ko01100,ko04070,ko04136,ko04140,ko05132,ko05152
LIPID-N-0556	PI(18:1_22:6)	GP	PI	40	7	907.541484	908.541482	[M-H]-	C49H81O13P	151.2	44.8	55.2	31.2	48.2	54.2	71.6	56.8	78.2	24.2	708	100.8	59.8	62.4	64	C01194	-	LMGP06010013	52927466	-	-	-	ko00562,ko00563,ko00564,ko01100,ko04070,ko04136,ko04140,ko05132,ko05152
LIPID-N-0544	PI(18:0_22:5)	GP	PI	40	5	911.572784	912.572782	[M-H]-	C49H85O13P	370	204	438	196.8	236	208	206	320	600	79.2	302	298	306	226	316	C01194	-	-	-	-	-	-	ko00562,ko00563,ko00564,ko01100,ko04070,ko04136,ko04140,ko05132,ko05152
LIPID-N-0547	PI(18:2_20:4)	GP	PI	38	6	881.525834	882.525832	[M-H]-	C47H79O13P	95.8	69.4	77	49	74.2	72.8	111.4	41.6	54.2	14.18	158	82	58.8	61.6	67.8	C01194	-	LMGP06010845	52928298	-	-	-	ko00562,ko00563,ko00564,ko01100,ko04070,ko04136,ko04140,ko05132,ko05152
LIPID-N-0538	PI(20:4_18:1)	GP	PI	38	5	883.541484	884.541482	[M-H]-	C47H81O13P	1018	1318	1872	1120	2240	1718	1986	568	1442	250	4340	2140	1336	1376	1402	C01194	HMDB0009895	LMGP06010599	53480102	-	-	-	ko00562,ko00563,ko00564,ko01100,ko04070,ko04136,ko04140,ko05132,ko05152
LIPID-N-0539	PI(18:0_20:5)	GP	PI	38	5	883.541484	884.541482	[M-H]-	C47H81O13P	36.2	27	40.6	58.8	88.4	69.6	46.4	21.4	45.2	10.58	113.2	94.2	50.2	46.4	50.8	C01194	-	LMGP06010628	52928081	-	-	-	ko00562,ko00563,ko00564,ko01100,ko04070,ko04136,ko04140,ko05132,ko05152
LIPID-N-0534	PI(16:0_20:5)	GP	PI	36	5	855.510184	856.510182	[M-H]-	C45H77O13P	8.14	6.42	8.24	4.4	7.04	13.78	11.48	2.64	6.66	2.38	45.2	13.58	7.02	4.84	4.72	C01194	-	LMGP06010623	52928076	-	-	-	ko00562,ko00563,ko00564,ko01100,ko04070,ko04136,ko04140,ko05132,ko05152
LIPID-N-0541	PI(18:1_22:4)	GP	PI	40	5	911.572784	912.572782	[M-H]-	C49H85O13P	33.2	50	47.4	26.4	45.2	38.8	50.2	16.64	47.8	3.66	168	64	39	37.4	39.2	C01194	-	LMGP06010307	52927760	-	-	-	ko00562,ko00563,ko00564,ko01100,ko04070,ko04136,ko04140,ko05132,ko05152
LIPID-N-0542	PI(20:2_20:3)	GP	PI	40	5	911.572784	912.572782	[M-H]-	C49H85O13P	2.76	4.38	8.7	4.52	3.58	4.36	N/A	4.42	5.56	N/A	N/A	N/A	4.42	4.5	3.86	C01194	-	LMGP06010548	52928001	-	-	-	ko00562,ko00563,ko00564,ko01100,ko04070,ko04136,ko04140,ko05132,ko05152
LIPID-N-0543	PI(20:4_20:1)	GP	PI	40	5	911.572784	912.572782	[M-H]-	C49H85O13P	31.2	55.6	73.4	27.2	38.4	43	59.6	29.4	47.6	19.72	234	87	42.6	38	42.4	C01194	HMDB0009898	LMGP06010607	52928060	-	-	-	ko00562,ko00563,ko00564,ko01100,ko04070,ko04136,ko04140,ko05132,ko05152
LIPID-N-0881	PMeOH(16:0_18:2)	GP	PMeOH	34	2	685.480832	686.488657	[M-H]-	C38H71O8P	0.647	0.499	0.548	0.535	0.961	1.44	0.851	0.359	0.354	0.333	2.25	1.45	1.18	0.853	1.02	-	-	-	-	-	-	-	-
LIPID-N-0892	PMeOH(18:0_22:4)	GP	PMeOH	40	4	765.543432	766.551257	[M-H]-	C44H79O8P	6.99	7.03	9.28	4.39	9.41	11.5	7.98	3.08	5.9	0.284	7.76	14.2	11	11	6.68	-	-	-	-	-	-	-	-
LIPID-N-0891	PMeOH(16:0_22:4)	GP	PMeOH	38	4	737.512132	738.519957	[M-H]-	C42H75O8P	3.62	3.06	4.03	2.44	5.36	6.12	4.17	1.79	2.38	0.566	6.34	4.99	4.84	4.8	3.89	-	-	-	-	-	-	-	-
LIPID-N-0883	PMeOH(18:1_18:1)	GP	PMeOH	36	2	713.512132	714.519957	[M-H]-	C40H75O8P	0.3	0.845	0.59	0.645	0.73	0.71	0.965	0.46	0.54	N/A	0.875	0.351	0.53	0.605	0.825	-	-	-	-	-	-	-	-
LIPID-N-0882	PMeOH(18:0_18:2)	GP	PMeOH	36	2	713.512132	714.519957	[M-H]-	C40H75O8P	N/A	0.305	0.285	0.757	1.28	1.07	0.827	0.207	0.346	0.267	0.768	0.927	0.657	0.95	0.759	-	-	-	-	-	-	-	-
LIPID-N-0877	PMeOH(16:0_16:0)	GP	PMeOH	32	0	661.480832	662.488657	[M-H]-	C36H71O8P	605	545	540	510	406.5	494	498	419	414.5	505	438.5	705	476	645	590	-	-	-	-	-	-	-	-
LIPID-N-0875	PMeOH(14:0_16:0)	GP	PMeOH	30	0	633.449532	634.457357	[M-H]-	C34H67O8P	0.917	0.93	1.1	0.705	0.596	0.92	0.813	0.818	1.01	0.893	0.77	0.738	0.614	0.668	0.988	-	-	-	-	-	-	-	-
LIPID-N-0901	PMeOH(18:0_22:6)	GP	PMeOH	40	6	761.512132	762.519957	[M-H]-	C44H75O8P	2.63	2.28	2.48	2.14	4.31	4.09	3.58	1.48	3.25	0.301	4.75	3.75	3.22	4.42	2.98	-	-	-	-	-	-	-	-
LIPID-N-0879	PMeOH(16:0_18:1)	GP	PMeOH	34	1	687.496482	688.504307	[M-H]-	C38H73O8P	3.33	5.86	4.76	4.56	8.27	12	4.79	3.61	6.71	1.53	11.7	7.2	8.82	7.25	8.11	-	-	-	-	-	-	-	-
LIPID-N-0876	PMeOH(15:0_16:0)	GP	PMeOH	31	0	647.465182	648.473007	[M-H]-	C35H69O8P	0.581	1.22	0.88	0.717	0.784	0.639	1.02	0.993	0.75	1.41	0.357	0.721	0.623	0.613	0.994	-	-	-	-	-	-	-	-
LIPID-N-1317	PS(21:0_20:3)	GP	PS	41	3	854.591115	855.598935	[M-H]-	C47H86NO10P	21.56	11.8	10.72	12.12	21.24	50.4	16.96	12.92	12.4	15.76	318.8	39.4	11.04	9.64	9.04	C02737	-	LMGP03010614	52925724	-	-	-	ko00260,ko00564,ko01100,ko05140,ko05146,ko05322
LIPID-N-1240	PS(16:0_20:0)	GP	PS	36	0	790.5598148	791.5676348	[M-H]-	C42H82NO10P	352	110	134.4	125.6	363.6	928	164.8	112.4	142.8	98.4	8840	792	197.6	172.4	170.8	C02737	HMDB0112345	LMGP03010035	9547095	-	-	-	ko00260,ko00564,ko01100,ko05140,ko05146,ko05322
LIPID-N-1237	PS(16:0_19:0)	GP	PS	35	0	776.5441648	777.5519848	[M-H]-	C41H80NO10P	48.4	15.84	16.84	14.28	25.12	81.6	20.36	20.84	27.08	17.2	576	37.8	17.16	21.2	20.8	C02737	-	LMGP03010953	52926060	-	-	-	ko00260,ko00564,ko01100,ko05140,ko05146,ko05322
LIPID-N-1229	PS(15:0_16:0)	GP	PS	31	0	720.4815645	721.4893845	[M-H]-	C37H72NO10P	132	29.52	19.32	21.96	48.4	93.6	30.56	66	21.32	46.8	234.4	86.8	42.4	26.52	26.96	C02737	HMDB0112342	LMGP03010910	52926018	-	-	-	ko00260,ko00564,ko01100,ko05140,ko05146,ko05322
LIPID-N-1245	PS(18:0_20:0)	GP	PS	38	0	818.591115	791.4737345	[M-H]-	C43H70NO10P	61.6	37.52	66	11.16	34.84	100.4	72	13.44	49.2	9.48	1444	118.8	41.6	35.76	39.48	C02737	HMDB0112516	LMGP03010952	52926059	-	-	-	ko00260,ko00564,ko01100,ko05140,ko05146,ko05322
LIPID-N-1322	PS(18:1_20:3)	GP	PS	38	4	810.5285147	817.5832849	[M-H]-	C44H84NO10P	95.2	37.32	43.6	67.6	24.68	172.8	62	18.92	33.16	31.52	1728	66.8	30.92	21.16	28.24	C02737	HMDB0012393	LMGP03010335	52925445	-	-	-	ko00260,ko00564,ko01100,ko05140,ko05146,ko05322
LIPID-N-1353	PS(22:2_20:4)	GP	PS	42	6	862.5598148	863.5676348	[M-H]-	C48H82NO10P	105.6	20.04	25.76	45.2	54.4	238	92.4	59.2	48.4	31.44	684	84.4	26.96	19.24	32.24	C02737	HMDB0112648	LMGP03010646	52925756	-	-	-	ko00260,ko00564,ko01100,ko05140,ko05146,ko05322
LIPID-N-1358	PS(17:1_22:6)	GP	PS	39	7	818.4972146	829.5832849	[M-H]-	C45H84NO10P	92.8	4.92	4.24	4.24	12.36	34	18.08	9.12	6	10.76	354	17.76	15.16	12	8.32	C02737	-	LMGP03010277	52925387	-	-	-	ko00260,ko00564,ko01100,ko05140,ko05146,ko05322
LIPID-N-1323	PS(18:2_20:2)	GP	PS	38	4	810.5285147	817.5832849	[M-H]-	C44H84NO10P	104.4	77.6	48.4	65.6	63.6	210.4	98	56.4	61.6	37.6	2000	118	40.4	41.6	31.56	C02737	HMDB0112431	LMGP03010358	52925468	-	-	-	ko00260,ko00564,ko01100,ko05140,ko05146,ko05322
LIPID-N-1330	PS(17:1_20:4)	GP	PS	37	5	794.4972146	795.5050346	[M-H]-	C43H74NO10P	72.4	27.16	45.6	35.04	70.4	123.6	55.6	25.08	36.28	21.72	832	81.2	29.24	21.96	20.76	C02737	-	LMGP03010270	52925380	-	-	-	ko00260,ko00564,ko01100,ko05140,ko05146,ko05322
LIPID-N-1334	PS(19:1_20:4)	GP	PS	39	5	822.5285147	823.5363347	[M-H]-	C45H78NO10P	320	144	132.8	127.2	88	383.2	240	148.8	181.6	361.6	2712	223.2	69.2	54.8	73.2	C02737	-	LMGP03010503	52925613	-	-	-	ko00260,ko00564,ko01100,ko05140,ko05146,ko05322
LIPID-N-1335	PS(18:1_22:4)	GP	PS	40	5	836.5441648	825.4580844	[M-H]-	C46H68NO10P	568	209.2	269.6	204.4	237.2	868	476	292.4	327.6	744	2520	412	190.4	239.2	150	C02737	HMDB0112420	LMGP03010339	52925449	-	-	-	ko00260,ko00564,ko01100,ko05140,ko05146,ko05322
LIPID-N-1345	PS(19:2_20:4)	GP	PS	39	6	820.5128646	829.5832849	[M-H]-	C45H84NO10P	26.2	32.2	27.56	26.4	21	72.4	77.6	15.56	23.32	11.28	166.4	34.84	10.8	17.72	14.68	C02737	-	-	-	-	-	-	ko00260,ko00564,ko01100,ko05140,ko05146,ko05322
LIPID-N-1338	PS(18:1_24:4)	GP	PS	42	5	864.5754649	865.5832849	[M-H]-	C48H84NO10P	70.4	39.52	38.36	26.92	31.32	74.8	21.52	45.2	43.2	35.76	608	73.6	38.28	36.44	36.36	C02737	-	-	-	-	-	-	ko00260,ko00564,ko01100,ko05140,ko05146,ko05322
LIPID-N-0599	PS(18:1_22:6)	GP	PS	40	7	832.512861	833.520686	[M-H]-	C46H76NO10P	N/A	40.8	47.2	37.2	95.6	17	60.8	28.72	53.2	76.8	227.2	41.2	31.6	38.52	37.16	C02737	HMDB0012395	LMGP03010045	52925155	-	52925155	-	ko00260,ko00564,ko01100,ko05140,ko05146,ko05322
LIPID-N-1250	PS(18:0_23:0)	GP	PS	41	0	860.6380652	861.6458852	[M-H]-	C47H92NO10P	18.36	18.68	21.68	22.84	43.2	70.4	29.44	16.76	26.16	9.12	225.2	28.8	14.08	15.8	19.92	C02737	-	-	-	-	-	-	ko00260,ko00564,ko01100,ko05140,ko05146,ko05322
LIPID-N-0598	PS(18:0_22:6)	GP	PS	40	6	834.528511	835.536336	[M-H]-	C46H78NO10P	960	708	1212	1336	3076	1188	1444	1260	2564	760	9600	2564	1348	1376	1404	C02737	HMDB0010167	LMGP03010040	24779546	-	59720717	-	ko00260,ko00564,ko01100,ko05140,ko05146,ko05322
LIPID-N-1251	PS(20:0_21:0)	GP	PS	41	0	860.6380652	861.6458852	[M-H]-	C47H92NO10P	7.28	10.92	13.56	2.612	5	14.56	13.2	2.832	6.2	N/A	108.8	14.28	5.16	7.08	6.2	C02737	-	LMGP03010524	52925634	-	-	-	ko00260,ko00564,ko01100,ko05140,ko05146,ko05322
LIPID-N-0595	PS(18:0_22:5)	GP	PS	40	5	836.544161	837.551986	[M-H]-	C46H80NO10P	N/A	7.28	29.84	26.92	114	56	39.12	N/A	25.28	15.32	620	29.52	35.08	41.2	29.44	C02737	HMDB0010166	-	53480355	-	-	-	ko00260,ko00564,ko01100,ko05140,ko05146,ko05322
LIPID-N-1258	PS(15:0_18:1)	GP	PS	33	1	746.4972146	749.5206846	[M-H]-	C39H76NO10P	96	33.52	32.08	46.4	56.4	207.2	75.6	16.32	29.88	22.44	896	150.8	39.32	32.72	29.08	C02737	HMDB0112284	LMGP03010145	52925255	-	-	-	ko00260,ko00564,ko01100,ko05140,ko05146,ko05322
LIPID-N-1268	PS(18:0_19:1)	GP	PS	37	1	802.5598148	803.5676348	[M-H]-	C43H82NO10P	27.08	12.64	10.4	15.4	20	53.2	29.92	9.16	13.4	9.96	330	27.72	13.44	7.48	10.96	C02737	-	LMGP03010318	52925428	-	-	-	ko00260,ko00564,ko01100,ko05140,ko05146,ko05322
LIPID-N-1273	PS(20:0_18:1)	GP	PS	38	1	816.5754649	817.5832849	[M-H]-	C44H84NO10P	66.8	18.84	31.68	16.04	39.92	67.6	17.16	24	17.88	13.08	1092	111.2	21.12	24.12	28.88	C02737	HMDB0112518	LMGP03010951	52926058	-	-	-	ko00260,ko00564,ko01100,ko05140,ko05146,ko05322
LIPID-N-1277	PS(21:0_18:1)	GP	PS	39	1	830.591115	831.598935	[M-H]-	C45H86NO10P	28.8	21.44	17.04	28.88	48	97.2	29.28	15.08	29.48	8	1708	86.4	28.8	36.04	33.12	C02737	-	LMGP03010685	52925795	-	-	-	ko00260,ko00564,ko01100,ko05140,ko05146,ko05322
LIPID-N-1286	PS(15:0_18:2)	GP	PS	33	2	744.4815645	749.5206846	[M-H]-	C39H76NO10P	26.36	15.76	16.52	9.96	15.08	114.4	27.04	16.52	17.16	12.76	351.6	47.2	14.36	9.48	17.24	C02737	HMDB0112425	LMGP03010344	52925454	-	-	-	ko00260,ko00564,ko01100,ko05140,ko05146,ko05322
LIPID-N-1288	PS(16:1_17:1)	GP	PS	33	2	744.4815645	749.5206846	[M-H]-	C39H76NO10P	45.2	14	14.96	12.44	22.36	99.6	34.32	22.76	19.24	8.56	708	52.4	17.6	24.68	16.8	C02737	-	LMGP03010209	52925319	-	-	-	ko00260,ko00564,ko01100,ko05140,ko05146,ko05322
LIPID-N-1291	PS(17:1_18:1)	GP	PS	35	2	772.5128646	777.5519848	[M-H]-	C41H80NO10P	604	112.8	118	116	159.6	836	268	197.2	222.4	106.8	3852	612	251.6	143.6	171.2	C02737	-	LMGP03010259	52925369	-	-	-	ko00260,ko00564,ko01100,ko05140,ko05146,ko05322
LIPID-N-1304	PS(15:0_18:3)	GP	PS	33	3	742.4659145	749.5206846	[M-H]-	C39H76NO10P	61.2	3.248	3.2	4.16	5.36	12.36	3.668	7.08	4.84	6.24	788	7.72	7.64	11.44	11.12	C02737	HMDB0112324	LMGP03010146	52925256	-	-	-	ko00260,ko00564,ko01100,ko05140,ko05146,ko05322
LIPID-N-0570	PS(18:0_18:1)	GP	PS	36	1	788.544161	789.551986	[M-H]-	C42H80NO10P	61.2	49.2	69.2	91.2	158.8	99.2	83.2	80.8	51.2	77.6	692	113.6	74.8	84	78	C02737	HMDB0010163	LMGP03010025	59720717	124262-93-7	59720717	-	ko00260,ko00564,ko01100,ko05140,ko05146,ko05322
LIPID-N-0569	PS(18:0_17:1)	GP	PS	35	1	774.528511	775.536336	[M-H]-	C41H78NO10P	265.6	28.2	40.4	60.4	116	357.6	70.4	130.4	97.6	68.4	2236	184.4	80.4	80.8	72.4	C02737	-	LMGP03010313	52925423	-	-	-	ko00260,ko00564,ko01100,ko05140,ko05146,ko05322
LIPID-N-0566	PS(17:0_16:1)	GP	PS	33	1	746.497211	747.505036	[M-H]-	C39H74NO10P	218.4	73.2	45.2	33.48	57.2	208.8	65.2	177.2	78	102.8	596	160.8	63.2	70.8	61.2	C02737	-	LMGP03010230	52925340	-	-	-	ko00260,ko00564,ko01100,ko05140,ko05146,ko05322
LIPID-N-0560	PS(16:0_16:0)	GP	PS	32	0	734.497211	735.505036	[M-H]-	C38H74NO10P	7.84	10.42	11.2	13.06	19.76	8.3	11.34	15.06	10.52	N/A	N/A	23	11.5	7.86	12	C02737	HMDB0000614	LMGP03010029	9547090	40290-42-4	-	-	ko00260,ko00564,ko01100,ko05140,ko05146,ko05322
LIPID-N-0596	PS(16:0_22:6)	GP	PS	38	6	806.497211	807.505036	[M-H]-	C44H74NO10P	59.6	109.2	124.8	86.8	186	85.6	169.6	50.8	142	78.8	1020	135.2	92.4	91.6	94.4	C02737	HMDB0012362	LMGP03010043	46891805	-	-	-	ko00260,ko00564,ko01100,ko05140,ko05146,ko05322
LIPID-N-1309	PS(18:1_19:2)	GP	PS	37	3	798.5285147	799.5363347	[M-H]-	C43H78NO10P	39.36	20.92	32.96	40.4	36.24	138.4	64.8	11.96	32.04	29.52	1104	44	18.72	25.84	18.04	C02737	-	-	-	-	-	-	ko00260,ko00564,ko01100,ko05140,ko05146,ko05322
LIPID-N-1312	PS(18:1_20:2)	GP	PS	38	3	812.5441648	817.5832849	[M-H]-	C44H84NO10P	464	179.6	196.4	154	210	580	222.4	201.2	172.4	440	7320	428	96	127.2	127.2	C02737	HMDB0112413	LMGP03010334	52925444	-	-	-	ko00260,ko00564,ko01100,ko05140,ko05146,ko05322
LIPID-N-0571	PS(18:1_19:0)	GP	PS	37	1	802.559811	803.567636	[M-H]-	C43H82NO10P	23.76	12.68	20.6	18.44	13.68	38.56	27.52	19.32	12.68	36.8	136.8	24.2	11.84	10.76	12.12	C02737	-	LMGP03010332	52925442	-	-	-	ko00260,ko00564,ko01100,ko05140,ko05146,ko05322
LIPID-N-0572	PS(18:1_20:0)	GP	PS	38	1	816.575461	817.583286	[M-H]-	C44H84NO10P	50.4	11.2	17.28	11.6	31.6	112.4	28	21.96	21.8	20.12	1016	106	19.44	25.08	25.88	C02737	HMDB0112350	LMGP03010957	131819724	-	-	-	ko00260,ko00564,ko01100,ko05140,ko05146,ko05322
LIPID-N-0577	PS(18:0_18:2)	GP	PS	36	2	786.528511	787.536336	[M-H]-	C42H78NO10P	17.08	24	15.72	44.8	138	45.6	48.4	38.84	40.8	49.6	560	101.6	46.4	51.6	45.6	C02737	HMDB0012380	LMGP03010031	9547091	132014-81-4	-	-	ko00260,ko00564,ko01100,ko05140,ko05146,ko05322
LIPID-N-0578	PS(18:1_19:1)	GP	PS	37	2	800.544161	801.551986	[M-H]-	C43H80NO10P	124.8	54.4	49.6	51.6	56.4	118.8	71.6	90.4	95.6	90.8	2564	81.2	52	38.28	34.52	C02737	-	LMGP03010333	52925443	-	-	-	ko00260,ko00564,ko01100,ko05140,ko05146,ko05322
LIPID-N-0580	PS(18:1_22:1)	GP	PS	40	2	842.606761	843.614586	[M-H]-	C46H86NO10P	12.68	5.52	6.92	9.12	19.72	37.16	9.56	8	8.2	3.752	712	24.2	13.48	12.24	10.2	C02737	HMDB0112417	LMGP03010337	52926062	-	-	-	ko00260,ko00564,ko01100,ko05140,ko05146,ko05322
LIPID-N-0583	PS(17:0_20:3)	GP	PS	37	3	798.528511	799.536336	[M-H]-	C43H78NO10P	39.28	28.16	13.6	25.72	54.4	113.6	42.4	33.08	28.48	29	920	75.6	27.56	21.6	26.08	C02737	-	LMGP03010241	52925351	-	-	-	ko00260,ko00564,ko01100,ko05140,ko05146,ko05322
LIPID-N-0584	PS(18:0_20:3)	GP	PS	38	3	812.544161	813.551986	[M-H]-	C44H80NO10P	24.92	18.72	22.84	34.92	64.4	30.12	24.96	35.28	38.44	53.2	65.6	50.8	29.44	32.76	24.96	C02737	HMDB0012382	LMGP03010885	52925994	-	-	-	ko00260,ko00564,ko01100,ko05140,ko05146,ko05322
LIPID-N-0587	PS(16:0_20:4)	GP	PS	36	4	782.497211	783.505036	[M-H]-	C42H74NO10P	26.52	35.84	37.72	30.04	52	28.32	61.6	20.4	14.64	25.28	N/A	40.8	29.72	22.64	21.48	C02737	HMDB0012361	LMGP03010038	24779544	-	-	-	ko00260,ko00564,ko01100,ko05140,ko05146,ko05322
LIPID-N-0588	PS(17:0_20:4)	GP	PS	37	4	796.512861	797.520686	[M-H]-	C43H76NO10P	114.4	35.6	34	18.96	19.84	116.8	42.4	66.4	27.4	204.8	828	67.6	17.2	20.04	16.44	C02737	-	LMGP03010003	5283501	-	-	-	ko00260,ko00564,ko01100,ko05140,ko05146,ko05322
LIPID-N-0589	PS(18:0_20:4)	GP	PS	38	4	810.528511	811.536336	[M-H]-	C44H78NO10P	72.4	16.52	25.48	25.28	46.8	127.6	59.6	5.08	32.24	7.96	916	63.2	12.6	14.6	12.32	C02737	HMDB0012383	LMGP03010039	24779545	132014-80-3	-	-	ko00260,ko00564,ko01100,ko05140,ko05146,ko05322
LIPID-N-0593	PS(18:0_20:5)	GP	PS	38	5	808.512861	809.520686	[M-H]-	C44H76NO10P	11.24	13.04	23.32	22.84	60.4	29	45.6	16.08	12.16	10.52	N/A	8.96	14.96	18.6	26.28	C02737	HMDB0112378	LMGP03010884	52925993	-	-	-	ko00260,ko00564,ko01100,ko05140,ko05146,ko05322
LIPID-N-1311	PS(19:1_18:2)	GP	PS	37	3	798.5285147	799.5363347	[M-H]-	C43H78NO10P	148	71.6	78.8	117.2	98.8	338.8	173.6	54	77.6	81.2	2192	128.8	65.6	59.2	61.2	C02737	-	LMGP03010493	52925603	-	-	-	ko00260,ko00564,ko01100,ko05140,ko05146,ko05322
LIPID-N-0567	PS(16:0_18:1)	GP	PS	34	1	760.512861	761.520686	[M-H]-	C40H76NO10P	19.32	17.28	20.16	18.04	52.8	27.56	27.8	26.24	25.88	12.56	500	62.4	24.8	25.92	34.32	C02737	HMDB0012357	LMGP03010007	5283499	-	-	-	ko00260,ko00564,ko01100,ko05140,ko05146,ko05322
LIPID-P-0332	SHexCer(d18:1:/16:0)	SP	SHexCer	34	1	780.8	779.521734	[M+H]+	C40H77NO11S	12720	2920	5880	13640	20200	14440	8320	7880	8040	1180	14760	7840	11920	9440	16520	C06125	HMDB0012313	LMSP06020002	24779578	862509-48-6	-	-	ko00600,ko01100
LIPID-P-0745	SM(d18:1/23:0)	SP	SM	41	1	801.684951	800.677125	[M+H]+	C46H93N2O6P	80.8	79.8	156	306	472	242	143.2	55.2	130.4	32	370	133.8	193	152.8	184.6	C00550	HMDB0012105	LMSP03010078	46891684	121999-74-4	-	-	ko00600,ko01100,ko04071,ko04217
LIPID-P-0746	SM(d18:1/24:0)	SP	SM	42	1	815.700602	814.692775	[M+H]+	C47H95N2O6P	148.6	144.2	298	352	600	336	228	73.4	236	47	1382	418	302	322	304	C00550	HMDB0011697	LMSP03010008	5283595	60037-60-7	-	-	ko00600,ko01100,ko04071,ko04217
LIPID-P-0747	SM(d18:1/25:0)	SP	SM	43	1	829.716251	828.708425	[M+H]+	C48H97N2O6P	7.92	12.58	27	24.2	33.6	20	12.22	7.42	20.4	2.64	41.4	13.1	14.8	17.26	16.26	C00550	-	LMSP03010027	44260137	-	-	-	ko00600,ko01100,ko04071,ko04217
LIPID-P-0748	SM(d20:0/24:1)	SP	SM	44	1	843.731902	842.724075	[M+H]+	C49H99N2O6P	0.766	0.59	0.96	3.54	4.38	1.678	0.908	0.448	1.126	0.374	5.36	1.55	1.362	1.58	1.618	C00550	-	LMSP03010088	52931231	-	-	-	ko00600,ko01100,ko04071,ko04217
LIPID-P-0729	SM(d18:0/14:0)	SP	SM	32	0	677.559751	676.551925	[M+H]+	C37H77N2O6P	0.678	0.1566	0.308	0.718	1.082	0.538	0.284	0.392	0.514	0.458	1.21	0.608	0.756	0.468	0.75	C00550	HMDB0012085	LMSP03010030	44260138	871577-10-5	-	-	ko00600,ko01100,ko04071,ko04217
LIPID-P-0749	SM(d18:2/14:0)	SP	SM	32	2	673.528451	672.520625	[M+H]+	C37H73N2O6P	0.23	0.04	0.1918	0.302	0.524	0.264	0.1088	0.1452	0.197	0.1414	1.312	0.27	0.288	0.308	0.24	C00550	HMDB0240637	LMSP03010034	52931131	2292199-25-6	-	-	ko00600,ko01100,ko04071,ko04217
LIPID-P-1568	SM(d18:1/26:0)	SP	SM	44	1	843.7	842.724075	[M+H]+	C49H99N2O6P	0.672	0.574	0.738	3	3.16	1.89	0.8	0.498	1.126	0.304	5.38	1.528	1.356	1.43	1.43	C00550	-	LMSP03010026	44260136	-	-	-	ko00600,ko01100,ko04071,ko04217
LIPID-P-0741	SM(d18:1/19:0)	SP	SM	37	1	745.622351	744.614525	[M+H]+	C42H85N2O6P	5.58	4.02	7.7	9.64	18.98	16.98	7.7	3.78	5.78	1.698	12.96	8.2	7.38	9.76	8.28	C00550	-	LMSP03010055	52931171	-	-	-	ko00600,ko01100,ko04071,ko04217
LIPID-P-0751	SM(d18:1/17:1)	SP	SM	35	2	715.575401	714.567575	[M+H]+	C40H79N2O6P	0.48	0.164	0.348	0.734	1.388	0.664	0.618	0.262	0.428	0.185	2.78	0.844	0.906	0.618	0.55	C00550	-	-	-	-	-	-	ko00600,ko01100,ko04071,ko04217
LIPID-P-0754	SM(d18:1/20:1)	SP	SM	38	2	757.622351	756.614525	[M+H]+	C43H85N2O6P	1.692	1.666	2.88	3.1	5.54	3.54	1.998	1.612	2.76	1.412	11.46	4.36	3.48	2.48	2.3	C00550	HMDB0240610	LMSP03010059	52931179	222403-67-0	-	-	ko00600,ko01100,ko04071,ko04217
LIPID-P-0759	SM(d18:1/25:1)	SP	SM	43	2	827.700601	826.692775	[M+H]+	C48H95N2O6P	1.862	1.116	2.38	4.84	9.48	5.28	1.842	1.19	2.3	0.772	22.8	3.94	4.56	3.92	4.02	C00550	-	LMSP03010083	52931221	-	-	-	ko00600,ko01100,ko04071,ko04217
LIPID-P-0760	SM(d18:1/26:1)	SP	SM	44	2	841.716252	840.708425	[M+H]+	C49H97N2O6P	0.928	0.798	1.314	2.26	3.36	2.04	0.914	0.752	1.632	0.416	9.16	3.24	2.52	1.394	2.06	C00550	HMDB0013461	LMSP03010009	44260128	-	-	-	ko00600,ko01100,ko04071,ko04217
LIPID-P-0762	SM(d18:2/20:1)	SP	SM	38	3	755.606701	754.598875	[M+H]+	C43H83N2O6P	16.06	17.14	13.76	13.66	10.58	10.96	15.96	16.12	14.22	29	16.12	11.44	13.5	12.6	10.92	C00550	-	LMSP03010057	52931175	-	-	-	ko00600,ko01100,ko04071,ko04217
LIPID-P-0764	SM(d18:2/23:1)	SP	SM	41	3	797.653651	796.645825	[M+H]+	C46H89N2O6P	13.48	4.26	7.66	9.82	18.18	17.5	10.82	4.46	7.02	1.64	70.6	22.4	11.42	12.9	11.24	C00550	-	-	-	-	-	-	ko00600,ko01100,ko04071,ko04217
LIPID-P-0765	SM(d18:2/24:1)	SP	SM	42	3	811.669301	810.661475	[M+H]+	C47H91N2O6P	27.4	19.74	38.8	47.2	105.8	59	32	24.4	41.8	14.06	312	120.2	68.4	63	56.8	C00550	HMDB0240636	LMSP03010080	52931215	2256062-31-2	-	-	ko00600,ko01100,ko04071,ko04217
LIPID-P-0766	SM(d18:2/25:1)	SP	SM	43	3	825.684951	824.677125	[M+H]+	C48H93N2O6P	2.78	0.622	0.928	2.56	4.36	4.86	1.336	0.956	0.842	0.408	9.68	2.64	2.22	2.08	2.4	C00550	-	-	-	-	-	-	ko00600,ko01100,ko04071,ko04217
LIPID-P-0768	SM(d18:2/24:3)	SP	SM	42	5	807.638001	806.630175	[M+H]+	C47H87N2O6P	218	250	350	410	470	566	454	115.6	314	34.6	1022	418	380	340	372	C00550	-	-	-	-	-	-	ko00600,ko01100,ko04071,ko04217
LIPID-P-0752	SM(d18:1/18:1)	SP	SM	36	2	729.591051	728.583225	[M+H]+	C41H81N2O6P	4.8	2.14	3.38	9.94	15.18	8.18	4.08	2.98	5.02	6.1	15.6	6.64	8.34	6.04	6.26	C00550	HMDB0012101	LMSP03010050	6443882	108392-10-5	-	-	ko00600,ko01100,ko04071,ko04217
LIPID-P-0739	SM(d18:1/17:0)	SP	SM	35	1	717.591051	716.583225	[M+H]+	C40H81N2O6P	7.3	3.86	6.08	15.58	21.4	10.58	6.7	5.38	9.68	4.96	22.4	8.3	9.78	10.38	8.92	C00550	-	LMSP03010044	46891763	-	-	-	ko00600,ko01100,ko04071,ko04217
LIPID-P-0750	SM(d18:1/16:1)	SP	SM	34	2	701.559751	700.551925	[M+H]+	C39H77N2O6P	12.92	5.06	8.66	14.02	26.4	16.2	8.66	7.74	10.82	5.4	63.8	28.6	20.2	15.86	18.62	C00550	HMDB0240613	LMSP03010041	52931145	222403-66-9	-	-	ko00600,ko01100,ko04071,ko04217
LIPID-P-0734	SM(d18:0/22:0)	SP	SM	40	0	789.684952	788.677125	[M+H]+	C45H93N2O6P	4.3	2.66	5.78	7.98	10.74	8.06	3.76	1.654	5.02	1.244	20.2	17.12	7.64	7.32	7.86	C00550	HMDB0012091	LMSP03010022	44260132	221097-58-1	-	-	ko00600,ko01100,ko04071,ko04217
LIPID-P-0730	SM(d18:0/16:0)	SP	SM	34	0	705.591051	704.583225	[M+H]+	C39H81N2O6P	37.2	14.44	20.6	33.4	41	24	21.8	21.4	25.4	24.8	78.2	48.6	33.2	26.8	26	C00550	HMDB0010168	LMSP03010004	9939965	60322-02-3	-	-	ko00600,ko01100,ko04071,ko04217
LIPID-P-0731	SM(d18:0/17:0)	SP	SM	35	0	719.606701	718.598875	[M+H]+	C40H83N2O6P	10.04	7.08	9.26	9.68	13.2	13.12	7.12	8.46	7.76	2.52	66.6	21.8	12.42	10.36	10.94	C00550	-	LMSP03010046	52931153	-	-	-	ko00600,ko01100,ko04071,ko04217
LIPID-P-0732	SM(d18:0/18:0)	SP	SM	36	0	733.622351	732.614525	[M+H]+	C41H85N2O6P	7.8	4.42	4.68	7.42	8.72	4.64	7	2.96	7.9	4.92	13.26	7.72	6.74	8.18	6.94	C00550	HMDB0012087	LMSP03010020	44260130	-	-	-	ko00600,ko01100,ko04071,ko04217
LIPID-P-0735	SM(d18:1/12:0)	SP	SM	30	1	647.512801	646.504975	[M+H]+	C35H71N2O6P	0.688	0.1512	0.254	0.644	0.956	0.52	0.346	0.1788	0.406	0.278	2.44	0.63	0.768	0.498	0.636	C00550	HMDB0012096	LMSP03010002	44260123	-	-	-	ko00600,ko01100,ko04071,ko04217
LIPID-P-0736	SM(d18:1/14:0)	SP	SM	32	1	675.544101	674.536275	[M+H]+	C37H75N2O6P	21.2	3.98	8.6	22.2	36.4	18.66	11.08	8.88	12.88	8.28	84	18.34	23.8	18.54	20	C00550	HMDB0012097	LMSP03010028	11433862	121999-55-1	-	-	ko00600,ko01100,ko04071,ko04217
LIPID-P-0738	SM(d18:1/16:0)	SP	SM	34	1	703.575401	702.567575	[M+H]+	C39H79N2O6P	588	252	410	722	826	462	376	460	486	408	1888	608	668	498	552	C00550	HMDB0010169	LMSP03010003	9939941	6254-89-3	-	-	ko00600,ko01100,ko04071,ko04217
LIPID-P-0737	SM(d18:1/15:0)	SP	SM	33	1	689.559751	688.551925	[M+H]+	C38H77N2O6P	38.8	13.74	26.2	60.2	104.8	52	26	28.6	34.2	16.56	126.8	53	48.4	45.8	48.4	C00550	-	LMSP03010038	52931139	-	-	-	ko00600,ko01100,ko04071,ko04217
LIPID-P-0097	SPH(d18:2)	SP	SPH	18	2	298.274604	297.266779	[M+H]+	C18H35NO2	15.08	6.36	8.84	7.8	13.6	16.2	9.64	7.32	9.84	1.016	18.68	35.36	12.48	12.2	10.12	C00836	-	LMSP01080010	11220228	-	-	-	ko00600,ko01100,ko04071
LIPID-P-1279	SPH(d17:1)	SP	SPH	17	1	286.28244	285.266779	[M+H]+	C17H35NO2	5.48	2.592	3.116	4	5	4.88	3.96	2.784	3.064	0.556	3.764	4.8	3.864	3.764	3.872	C00836	-	LMSP01040002	5283557	-	-	-	ko00600,ko01100,ko04071
LIPID-P-0096	SPH(d18:1)	SP	SPH	18	1	300.290254	299.282429	[M+H]+	C18H37NO2	171.6	72.4	77.6	99.6	116.8	131.2	102.8	70	91.2	19.6	163.6	155.2	92.4	103.2	98.4	C00836	-	LMSP01010001	5280335	-	-	-	ko00600,ko01100,ko04071
LIPID-P-0094	SPH(d18:0)	SP	SPH	18	0	302.305904	301.298079	[M+H]+	C18H39NO2	4.76	1.872	2.596	2.832	4.36	4.44	2.072	2.032	2.828	0.784	5.12	4.88	2.332	2.972	2.68	C00836	HMDB0000269	LMSP01020001	91486	764-22-7	-	-	ko00600,ko01100,ko04071
LIPID-P-1278	SPH(d17:0)	SP	SPH	17	0	288.29068	287.282429	[M+H]+	C17H37NO2	0.0696	0.0596	0.0644	0.0828	0.07	0.0876	0.0596	0.0588	0.0354	0.0464	0.1	0.1088	0.046	0.056	0.0664	C00836	-	LMSP01040003	3247037	-	-	-	ko00600,ko01100,ko04071
LIPID-P-1280	SPH(d19:1)	SP	SPH	19	1	314.30701	313.298079	[M+H]+	C19H39NO2	0.1388	0.0112	0.0416	0.0964	0.1068	0.1096	0.01268	0.03324	0.1032	0.0048	0.3596	0.1792	0.082	0.0896	0.0628	C00836	-	-	-	-	-	-	ko00600,ko01100,ko04071
LIPID-P-2360	TG(20:1_18:3_18:3)	GL	TG	56	7	922.79	904.75199	[M+NH4]+	C59H100O6	48	5.08	6	2.248	2.712	7.56	6.36	10.04	9.28	2.528	13.6	7.36	10.72	7.72	12.44	C00422	-	-	-	-	-	-	ko00561,ko01100,ko04714,ko04923,ko04931,ko04975,ko04977,ko04979,ko05417
LIPID-P-2366	TG(18:0_16:1_24:6)	GL	TG	58	7	950.82	932.78329	[M+NH4]+	C61H104O6	84	11.64	8.4	6.88	8.4	25.84	14.36	14.64	36.44	5.56	32.96	64.4	32.84	23.12	40.8	C00422	-	-	-	-	-	-	ko00561,ko01100,ko04714,ko04923,ko04931,ko04975,ko04977,ko04979,ko05417
LIPID-P-2367	TG(18:1_18:2_19:2)	GL	TG	55	5	912.81	894.76764	[M+NH4]+	C58H102O6	30.08	5.84	7.64	4.64	3.8	3.436	4.68	11.64	14.08	4.36	4.4	13.84	9.76	8.88	8.88	C00422	-	-	-	-	-	-	ko00561,ko01100,ko04714,ko04923,ko04931,ko04975,ko04977,ko04979,ko05417
LIPID-P-2368	TG(18:1_18:2_22:3)	GL	TG	58	6	952.82	934.79894	[M+NH4]+	C61H106O6	880	119.2	128.4	36.64	37.76	104	105.2	216.4	243.2	68.8	233.2	416	201.2	173.2	235.6	C00422	-	-	-	-	-	-	ko00561,ko01100,ko04714,ko04923,ko04931,ko04975,ko04977,ko04979,ko05417
LIPID-P-2384	TG(18:2_20:3_22:5)	GL	TG	60	10	972.8	954.76764	[M+NH4]+	C63H102O6	53.6	2.196	4.08	1.22	1.348	3.56	2.664	5.32	20.36	2.248	18.16	11.56	11.96	7.8	7.32	C00422	-	-	-	-	-	-	ko00561,ko01100,ko04714,ko04923,ko04931,ko04975,ko04977,ko04979,ko05417
LIPID-P-2369	TG(18:1_18:2_24:5)	GL	TG	60	8	976.85	958.79894	[M+NH4]+	C63H106O6	26.8	2.268	2.288	0.556	N/A	1.34	1.276	4.36	5.24	1.328	3.072	2.952	3.876	3.764	4.6	C00422	-	-	-	-	-	-	ko00561,ko01100,ko04714,ko04923,ko04931,ko04975,ko04977,ko04979,ko05417
LIPID-P-2355	TG(18:0_18:2_20:2)	GL	TG	56	4	928.83	910.79894	[M+NH4]+	C59H106O6	2316	608	584	192.8	173.6	424	360.4	1736	536	296	267.6	528	776	588	548	C00422	-	-	-	-	-	-	ko00561,ko01100,ko04714,ko04923,ko04931,ko04975,ko04977,ko04979,ko05417
LIPID-P-2354	TG(18:0_18:1_24:5)	GL	TG	60	6	980.87	962.83024	[M+NH4]+	C63H110O6	21.2	2.536	2.328	0.604	1.116	1.5	1.748	4.24	8.48	0.572	3.172	5.28	3.536	3.696	2.468	C00422	-	-	-	-	-	-	ko00561,ko01100,ko04714,ko04923,ko04931,ko04975,ko04977,ko04979,ko05417
LIPID-P-2353	TG(20:1_18:2_18:3)	GL	TG	56	6	924.8	906.76764	[M+NH4]+	C59H102O6	8.32	2.124	5.36	0.784	1.204	2.98	0.96	2.18	5.16	0.864	5.24	5.04	4.68	4.76	6.08	C00422	-	-	-	-	-	-	ko00561,ko01100,ko04714,ko04923,ko04931,ko04975,ko04977,ko04979,ko05417
LIPID-P-2356	TG(18:0_18:2_20:3)	GL	TG	56	5	926.82	908.78329	[M+NH4]+	C59H104O6	5680	800	696	524	504	716	896	2928	1536	704	964	2312	2168	1236	1868	C00422	-	-	-	-	-	-	ko00561,ko01100,ko04714,ko04923,ko04931,ko04975,ko04977,ko04979,ko05417
LIPID-P-2371	TG(18:1_18:3_22:3)	GL	TG	58	7	950.82	932.78329	[M+NH4]+	C61H104O6	9.8	0.3684	2.18	0.3632	0.916	0.732	1.6	3.572	3.6	0.712	3.72	3.74	3.632	3.364	3.22	C00422	-	-	-	-	-	-	ko00561,ko01100,ko04714,ko04923,ko04931,ko04975,ko04977,ko04979,ko05417
LIPID-P-2380	TG(18:1_20:4_22:5)	GL	TG	60	10	972.8	954.76764	[M+NH4]+	C63H102O6	9.2	0.58	0.808	0.346	0.14	1.06	0.48	2.572	3.352	0.3184	7.84	4.48	2.36	3.684	4.2	C00422	-	-	-	-	-	-	ko00561,ko01100,ko04714,ko04923,ko04931,ko04975,ko04977,ko04979,ko05417
LIPID-P-2373	TG(18:1_20:1_20:2)	GL	TG	58	4	956.87	938.83024	[M+NH4]+	C61H110O6	188.8	75.2	83.2	11.68	7.92	28	53.6	144.8	109.2	18.84	16.44	60.8	51.6	87.2	71.6	C00422	-	-	-	-	-	-	ko00561,ko01100,ko04714,ko04923,ko04931,ko04975,ko04977,ko04979,ko05417
LIPID-P-2375	TG(18:1_20:1_22:4)	GL	TG	60	6	980.87	962.83024	[M+NH4]+	C63H110O6	25.36	1.98	3.64	0.532	0.784	1.588	4.36	5.52	4.56	0.756	7.92	6.68	4.28	5.88	6.56	C00422	-	-	-	-	-	-	ko00561,ko01100,ko04714,ko04923,ko04931,ko04975,ko04977,ko04979,ko05417
LIPID-P-2376	TG(18:1_20:1_24:5)	GL	TG	62	7	1006.87	988.84589	[M+NH4]+	C65H112O6	12.44	1.596	2.148	N/A	N/A	0.628	0.6	5.72	3.952	1.532	N/A	3.148	4.36	2.86	2.896	C00422	-	-	-	-	-	-	ko00561,ko01100,ko04714,ko04923,ko04931,ko04975,ko04977,ko04979,ko05417
LIPID-P-2377	TG(18:1_20:2_20:4)	GL	TG	58	7	950.81	932.78329	[M+NH4]+	C61H104O6	199.2	32.4	70.4	7.64	13.64	43.2	46.8	103.6	67.2	58.8	240.8	124.4	88	51.6	64	C00422	-	-	-	-	-	-	ko00561,ko01100,ko04714,ko04923,ko04931,ko04975,ko04977,ko04979,ko05417
LIPID-P-2378	TG(18:1_20:2_22:4)	GL	TG	60	7	978.84	960.81459	[M+NH4]+	C63H108O6	277.6	22.88	42	4.32	5.44	20.44	21.08	73.2	97.6	32.2	26.16	65.6	52.8	60	81.2	C00422	-	-	-	-	-	-	ko00561,ko01100,ko04714,ko04923,ko04931,ko04975,ko04977,ko04979,ko05417
LIPID-P-2379	TG(18:1_20:2_24:5)	GL	TG	62	8	1004.86	986.83024	[M+NH4]+	C65H110O6	42	2.548	4.2	0.608	N/A	2.188	1.548	7.16	6.88	2.648	1.776	5.6	7.28	4.24	5.08	C00422	-	-	-	-	-	-	ko00561,ko01100,ko04714,ko04923,ko04931,ko04975,ko04977,ko04979,ko05417
LIPID-P-2381	TG(18:1_20:5_22:5)	GL	TG	60	11	970.78	952.75199	[M+NH4]+	C63H100O6	18.48	1.84	2.624	3.368	3.436	6.84	3.588	2.356	10.12	0.564	15.16	22.68	10.64	8.36	8.64	C00422	-	-	-	-	-	-	ko00561,ko01100,ko04714,ko04923,ko04931,ko04975,ko04977,ko04979,ko05417
LIPID-P-2389	TG(20:0_20:4_22:6)	GL	TG	62	10	1000.83	982.79894	[M+NH4]+	C65H106O6	27.88	2.724	2.712	0.632	0.3872	3.696	1.26	6.68	8.64	2.804	6.96	13.64	6.92	3.884	6.88	C00422	-	-	-	-	-	-	ko00561,ko01100,ko04714,ko04923,ko04931,ko04975,ko04977,ko04979,ko05417
LIPID-P-2387	TG(20:0_18:1_22:6)	GL	TG	60	7	978.84	960.81459	[M+NH4]+	C63H108O6	17.12	6.6	3.82	0.768	0.2592	3.624	4.2	3.344	9.48	0.412	19.36	19.4	11.4	7.96	11.2	C00422	-	-	-	-	-	-	ko00561,ko01100,ko04714,ko04923,ko04931,ko04975,ko04977,ko04979,ko05417
LIPID-P-2386	TG(20:0_18:2_22:4)	GL	TG	60	6	980.87	962.83024	[M+NH4]+	C63H110O6	17.4	4.72	3.736	0.3664	0.46	3.244	3.848	7.32	10.6	2.072	15.12	9.2	10.36	8.76	5.6	C00422	-	-	-	-	-	-	ko00561,ko01100,ko04714,ko04923,ko04931,ko04975,ko04977,ko04979,ko05417
LIPID-P-2372	TG(18:1_19:1_22:6)	GL	TG	59	8	962.82	944.78329	[M+NH4]+	C62H104O6	33.52	3.556	3.016	2.152	2.628	4.88	2.424	4.6	10.36	2.264	6.76	17.44	4.68	8	6.28	C00422	-	-	-	-	-	-	ko00561,ko01100,ko04714,ko04923,ko04931,ko04975,ko04977,ko04979,ko05417
LIPID-P-2352	TG(20:0_18:3_18:3)	GL	TG	56	6	924.8	906.76764	[M+NH4]+	C59H102O6	80.4	5.48	11.12	5	6.8	8.52	7.32	15.16	24.96	3.668	12.56	18.72	18.2	12.68	20.96	C00422	-	-	-	-	-	-	ko00561,ko01100,ko04714,ko04923,ko04931,ko04975,ko04977,ko04979,ko05417
LIPID-P-2347	TG(17:1_18:2_22:6)	GL	TG	57	9	932.77	914.73634	[M+NH4]+	C60H98O6	19.72	1.76	2.536	0.784	1.264	3.108	2.72	4.4	6	0.94	7.52	6.32	5	4.72	7.08	C00422	-	-	-	-	-	-	ko00561,ko01100,ko04714,ko04923,ko04931,ko04975,ko04977,ko04979,ko05417
LIPID-P-2348	TG(17:1_19:2_19:2)	GL	TG	55	5	912.8	894.76764	[M+NH4]+	C58H102O6	34.84	9.16	12.48	4.28	5.92	5.92	4.48	21.76	15.84	5.6	7.12	17.6	9.92	12.84	16.04	C00422	-	-	-	-	-	-	ko00561,ko01100,ko04714,ko04923,ko04931,ko04975,ko04977,ko04979,ko05417
LIPID-P-2311	TG(16:0_17:1_22:6)	GL	TG	55	7	908.78	890.73634	[M+NH4]+	C58H98O6	199.6	14.52	36.48	6.84	15.4	64.4	23.44	47.2	69.6	11.64	78.4	98.8	40.4	51.2	67.2	C00422	-	-	-	-	-	-	ko00561,ko01100,ko04714,ko04923,ko04931,ko04975,ko04977,ko04979,ko05417
LIPID-P-2309	TG(16:0_16:2_18:3)	GL	TG	50	5	842.73	824.68939	[M+NH4]+	C53H92O6	63.2	20.8	29.4	9.8	10.92	21.36	18.72	18.6	22.4	5.04	21.28	25.44	22.36	28.24	20.76	C00422	-	-	-	-	-	-	ko00561,ko01100,ko04714,ko04923,ko04931,ko04975,ko04977,ko04979,ko05417
LIPID-P-2308	TG(16:0_16:1_18:4)	GL	TG	50	5	842.72	824.68939	[M+NH4]+	C53H92O6	18.44	3.032	5.52	3.268	3.356	4.56	8.12	3.532	7.32	0.948	7.2	6.36	5.88	5.96	5.16	C00422	-	-	-	-	-	-	ko00561,ko01100,ko04714,ko04923,ko04931,ko04975,ko04977,ko04979,ko05417
LIPID-P-2307	TG(16:0_16:0_20:2)	GL	TG	52	2	876.8	858.76764	[M+NH4]+	C55H102O6	122.8	20.48	38.48	9.2	12.6	16.64	20.04	68.4	38.24	19.44	32.88	46.4	58	32.76	48.4	C00422	-	-	-	-	-	-	ko00561,ko01100,ko04714,ko04923,ko04931,ko04975,ko04977,ko04979,ko05417
LIPID-P-2306	TG(15:1_18:2_22:6)	GL	TG	55	9	904.74	886.70504	[M+NH4]+	C58H94O6	14.48	0.776	1.68	1.016	1.86	4.08	0.816	3.36	5.68	0.528	10.24	9.84	4.72	4	5.48	C00422	-	-	-	-	-	-	ko00561,ko01100,ko04714,ko04923,ko04931,ko04975,ko04977,ko04979,ko05417
LIPID-P-2304	TG(15:1_18:1_18:2)	GL	TG	51	4	858.76	840.72069	[M+NH4]+	C54H96O6	45.6	4.12	13.48	7.08	5	17	6.72	8.68	15.2	2.984	7.08	7.32	11.68	9.64	11.68	C00422	-	-	-	-	-	-	ko00561,ko01100,ko04714,ko04923,ko04931,ko04975,ko04977,ko04979,ko05417
LIPID-P-2303	TG(16:0_15:1_18:2)	GL	TG	49	3	832.73	814.70504	[M+NH4]+	C52H94O6	42.4	8.56	8.6	5.08	2.936	10.28	8.04	14.16	11	2.944	8.72	8.24	7.68	11.56	11.48	C00422	-	-	-	-	-	-	ko00561,ko01100,ko04714,ko04923,ko04931,ko04975,ko04977,ko04979,ko05417
LIPID-P-2300	TG(14:0_17:2_18:2)	GL	TG	49	4	830.73	812.68939	[M+NH4]+	C52H92O6	12.88	2.784	5.68	3.02	3.8	4.96	3.12	2.724	5.36	1.24	4.48	4	4.28	3.388	3.936	C00422	-	-	-	-	-	-	ko00561,ko01100,ko04714,ko04923,ko04931,ko04975,ko04977,ko04979,ko05417
LIPID-P-2299	TG(15:1_15:1_19:2)	GL	TG	49	4	830.72	812.68939	[M+NH4]+	C52H92O6	30.8	8.76	9.12	5.38	5.46	8.7	8.9	10.28	8.04	2.36	7.4	15.02	8.22	9.68	8.62	C00422	-	-	-	-	-	-	ko00561,ko01100,ko04714,ko04923,ko04931,ko04975,ko04977,ko04979,ko05417
LIPID-P-2297	TG(15:0_18:1_20:5)	GL	TG	53	6	882.75	864.72069	[M+NH4]+	C56H96O6	17.88	2.484	3.436	0.3448	0.636	3.628	1.828	1.76	6.08	0.616	6.04	3.196	4.32	4.24	3.424	C00422	-	-	-	-	-	-	ko00561,ko01100,ko04714,ko04923,ko04931,ko04975,ko04977,ko04979,ko05417
LIPID-P-2296	TG(15:0_18:0_18:1)	GL	TG	51	1	864.77	846.76764	[M+NH4]+	C54H102O6	123.2	38.04	80.4	29.72	50.8	53.6	37	60	69.6	17.48	33.72	64	42	43.6	49.2	C00422	-	-	-	-	-	-	ko00561,ko01100,ko04714,ko04923,ko04931,ko04975,ko04977,ko04979,ko05417
LIPID-P-2295	TG(15:0_15:0_15:1)	GL	TG	45	1	780.69	762.67374	[M+NH4]+	C48H90O6	4.76	1.688	4.52	2.24	2.164	1.212	1.24	0.828	1.08	0.88	2.744	0.508	1.944	1.12	1.964	C00422	-	-	-	-	-	-	ko00561,ko01100,ko04714,ko04923,ko04931,ko04975,ko04977,ko04979,ko05417
LIPID-P-2294	TG(11:0_18:1_18:2)	GL	TG	47	3	804.71	786.67374	[M+NH4]+	C50H90O6	14.48	3.328	4.44	1.816	1.02	4.64	2.46	3.52	4.64	N/A	3.276	3.312	2.204	3.4	3.48	C00422	-	-	-	-	-	-	ko00561,ko01100,ko04714,ko04923,ko04931,ko04975,ko04977,ko04979,ko05417
LIPID-P-2290	TG(14:0_20:4_22:6)	GL	TG	56	10	916.73	898.70504	[M+NH4]+	C59H94O6	28.84	1.716	3.436	0.916	1.144	3.304	1.86	2.08	6.92	0.3312	13.16	5.64	5.92	6.36	4.24	C00422	-	-	-	-	-	-	ko00561,ko01100,ko04714,ko04923,ko04931,ko04975,ko04977,ko04979,ko05417
LIPID-P-2289	TG(14:0_20:2_22:6)	GL	TG	56	8	920.76	902.73634	[M+NH4]+	C59H98O6	1580	218	319.6	77.6	191.2	378.8	436	390	504	93.6	1192	1768	496	472	652	C00422	-	-	-	-	-	-	ko00561,ko01100,ko04714,ko04923,ko04931,ko04975,ko04977,ko04979,ko05417
LIPID-P-2286	TG(14:0_18:0_18:1)	GL	TG	50	1	850.78	832.75199	[M+NH4]+	C53H100O6	81.6	32.8	46.8	31.16	16.44	53.6	42.4	84	85.6	17.72	59.2	46.4	39.16	49.6	48	C00422	-	-	-	-	-	-	ko00561,ko01100,ko04714,ko04923,ko04931,ko04975,ko04977,ko04979,ko05417
LIPID-P-2284	TG(14:0_14:0_16:1)	GL	TG	44	1	766.69	748.65809	[M+NH4]+	C47H88O6	100.8	16.06	19.34	17.18	7.34	22.6	27.6	14.76	29.4	18.28	21.8	12.32	29.8	26	29.8	C00422	-	-	-	-	-	-	ko00561,ko01100,ko04714,ko04923,ko04931,ko04975,ko04977,ko04979,ko05417
LIPID-P-2282	TG(15:0_18:2_22:5)	GL	TG	55	7	908.75	890.73634	[M+NH4]+	C58H98O6	23.04	2.108	5	0.532	3.336	6.88	4.28	4.04	9.28	1.032	10.12	14.96	5.92	6.64	9.08	C00422	-	-	-	-	-	-	ko00561,ko01100,ko04714,ko04923,ko04931,ko04975,ko04977,ko04979,ko05417
LIPID-P-2280	TG(13:0_18:1_22:6)	GL	TG	53	7	880.74	862.70504	[M+NH4]+	C56H94O6	54.4	1.332	6.2	1.228	2.636	6.04	3.792	6.24	9.04	1.46	12.6	9.04	9.24	8.88	13.12	C00422	-	-	-	-	-	-	ko00561,ko01100,ko04714,ko04923,ko04931,ko04975,ko04977,ko04979,ko05417
LIPID-P-2279	TG(13:0_18:1_18:2)	GL	TG	49	3	832.73	814.70504	[M+NH4]+	C52H94O6	40	2.488	3.932	2.004	1.876	3.98	5.04	2.66	6.6	0.968	2.892	3.332	4.48	6.04	5.76	C00422	-	-	-	-	-	-	ko00561,ko01100,ko04714,ko04923,ko04931,ko04975,ko04977,ko04979,ko05417
LIPID-P-2277	TG(13:0_16:0_22:6)	GL	TG	51	6	854.73	836.68939	[M+NH4]+	C54H92O6	20.44	0.916	1.688	N/A	N/A	0.62	1.232	1.324	3.424	0.668	10.2	2.312	3.344	2.052	3.368	C00422	-	-	-	-	-	-	ko00561,ko01100,ko04714,ko04923,ko04931,ko04975,ko04977,ko04979,ko05417
LIPID-P-2276	TG(12:0_18:1_22:6)	GL	TG	52	7	866.72	848.68939	[M+NH4]+	C55H92O6	304.8	17.12	31.52	5.08	13.44	23.36	27.08	20.08	34.52	7.12	80	29.64	28.28	44.4	33.76	C00422	-	-	-	-	-	-	ko00561,ko01100,ko04714,ko04923,ko04931,ko04975,ko04977,ko04979,ko05417
LIPID-P-2274	TG(12:0_16:1_22:6)	GL	TG	50	7	838.7	820.65809	[M+NH4]+	C53H88O6	29.48	0.904	1.76	0.528	0.464	0.964	1.78	3.408	5.08	0.868	7.88	2.992	2.7	3.096	4.44	C00422	-	-	-	-	-	-	ko00561,ko01100,ko04714,ko04923,ko04931,ko04975,ko04977,ko04979,ko05417
LIPID-P-2312	TG(16:0_17:2_20:4)	GL	TG	53	6	882.75	864.72069	[M+NH4]+	C56H96O6	20.36	5	5.92	2.716	4.24	6.48	4.68	5.96	9.04	0.496	22.08	6.56	6.08	11.08	10.04	C00422	-	-	-	-	-	-	ko00561,ko01100,ko04714,ko04923,ko04931,ko04975,ko04977,ko04979,ko05417
LIPID-P-2351	TG(18:1_20:2_18:3)	GL	TG	56	6	924.8	906.76764	[M+NH4]+	C59H102O6	1672	306	321.2	104.8	241.2	424	331.6	428	740	110.8	1036	1172	828	496	660	C00422	-	-	-	-	-	-	ko00561,ko01100,ko04714,ko04923,ko04931,ko04975,ko04977,ko04979,ko05417
LIPID-P-2313	TG(16:1_18:1_16:3)	GL	TG	50	5	842.72	824.68939	[M+NH4]+	C53H92O6	226	56.4	42	34.48	32.76	25.52	50.8	53.6	62.8	11.08	56	44.4	43.2	63.6	50.4	C00422	-	-	-	-	-	-	ko00561,ko01100,ko04714,ko04923,ko04931,ko04975,ko04977,ko04979,ko05417
LIPID-P-2316	TG(16:0_19:2_20:4)	GL	TG	55	6	910.78	892.75199	[M+NH4]+	C58H100O6	97.6	12.36	15.72	7.84	10	19.36	18.2	24.36	25.84	2.68	41.6	39.44	24.56	23.8	34.44	C00422	-	-	-	-	-	-	ko00561,ko01100,ko04714,ko04923,ko04931,ko04975,ko04977,ko04979,ko05417
LIPID-P-2346	TG(18:0_20:2_18:3)	GL	TG	56	5	926.82	908.78329	[M+NH4]+	C59H104O6	236.4	37	26.68	13.88	24.16	46	43.6	35.4	64	4.44	130.8	120.4	60.8	73.6	60	C00422	-	-	-	-	-	-	ko00561,ko01100,ko04714,ko04923,ko04931,ko04975,ko04977,ko04979,ko05417
LIPID-P-2345	TG(17:0_18:3_18:3)	GL	TG	53	6	882.76	864.72069	[M+NH4]+	C56H96O6	1.444	0.374	0.58	0.1766	0.246	0.334	0.412	0.764	0.894	0.1374	0.776	0.638	0.744	0.802	0.472	C00422	-	-	-	-	-	-	ko00561,ko01100,ko04714,ko04923,ko04931,ko04975,ko04977,ko04979,ko05417
LIPID-P-2344	TG(17:0_18:2_22:5)	GL	TG	57	7	936.79	918.76764	[M+NH4]+	C60H102O6	35.8	6.4	6.04	1.356	1.7	6.68	1.508	7.52	18.56	3.144	15.8	17.2	15.2	10.36	9.52	C00422	-	-	-	-	-	-	ko00561,ko01100,ko04714,ko04923,ko04931,ko04975,ko04977,ko04979,ko05417
LIPID-P-2343	TG(17:0_18:2_20:4)	GL	TG	55	6	910.79	892.75199	[M+NH4]+	C58H100O6	7.28	0.624	0.528	0.68	N/A	1.6	0.752	2.852	0.808	1.036	2.812	1.964	2.344	3.856	4.04	C00422	-	-	-	-	-	-	ko00561,ko01100,ko04714,ko04923,ko04931,ko04975,ko04977,ko04979,ko05417
LIPID-P-2342	TG(17:0_18:2_18:3)	GL	TG	53	5	884.77	866.73634	[M+NH4]+	C56H98O6	30.24	6.28	9.92	6.88	6.52	7.2	8.16	9.36	7.84	2.256	7.88	9.28	11	6.84	12.56	C00422	-	-	-	-	-	-	ko00561,ko01100,ko04714,ko04923,ko04931,ko04975,ko04977,ko04979,ko05417
LIPID-P-2341	TG(17:0_18:1_20:3)	GL	TG	55	4	914.82	896.78329	[M+NH4]+	C58H104O6	108.8	14.12	18.96	11.92	10.24	22.6	14.6	46	29.68	10.28	20.88	27.28	22.36	25.24	34.32	C00422	-	-	-	-	-	-	ko00561,ko01100,ko04714,ko04923,ko04931,ko04975,ko04977,ko04979,ko05417
LIPID-P-2339	TG(20:0_18:2_18:2)	GL	TG	56	4	928.84	910.79894	[M+NH4]+	C59H106O6	896	210.8	382.4	88.4	60.8	140.8	248.4	327.6	234	50.4	92.4	253.6	244.4	241.6	218	C00422	-	-	-	-	-	-	ko00561,ko01100,ko04714,ko04923,ko04931,ko04975,ko04977,ko04979,ko05417
LIPID-P-2337	TG(18:1_19:1_18:3)	GL	TG	55	5	912.79	894.76764	[M+NH4]+	C58H102O6	8.56	0.86	2.86	1.796	1.368	2.692	4.36	4.6	2.52	1.388	1.852	3.376	2.832	3.164	2.32	C00422	-	-	-	-	-	-	ko00561,ko01100,ko04714,ko04923,ko04931,ko04975,ko04977,ko04979,ko05417
LIPID-P-2336	TG(19:0_18:2_18:2)	GL	TG	55	4	914.8	896.78329	[M+NH4]+	C58H104O6	260.4	39.44	63.2	44.4	33.88	40.8	60.8	96	89.6	18.08	27	94.4	78	82.4	98.4	C00422	-	-	-	-	-	-	ko00561,ko01100,ko04714,ko04923,ko04931,ko04975,ko04977,ko04979,ko05417
LIPID-P-2335	TG(16:1_18:3_20:4)	GL	TG	54	8	892.74	874.70504	[M+NH4]+	C57H94O6	11	1.62	3.404	1.112	2.392	2.82	2.972	1.92	2.316	0.2452	17.64	5.4	3.632	4.16	5.12	C00422	-	-	-	-	-	-	ko00561,ko01100,ko04714,ko04923,ko04931,ko04975,ko04977,ko04979,ko05417
LIPID-P-2334	TG(16:1_18:1_20:5)	GL	TG	54	7	894.76	876.72069	[M+NH4]+	C57H96O6	277.6	23.84	47.2	5.92	12.44	36.16	24.12	50.4	94.4	8.12	84.8	112.4	44.8	57.6	63.2	C00422	-	-	-	-	-	-	ko00561,ko01100,ko04714,ko04923,ko04931,ko04975,ko04977,ko04979,ko05417
LIPID-P-2333	TG(16:1_17:1_22:6)	GL	TG	55	8	906.75	888.72069	[M+NH4]+	C58H96O6	39	5.04	7.52	1.956	2.572	8.68	5.84	7.2	8.08	1.836	15.56	20.92	8.84	7.72	13	C00422	-	-	-	-	-	-	ko00561,ko01100,ko04714,ko04923,ko04931,ko04975,ko04977,ko04979,ko05417
LIPID-P-2332	TG(16:1_16:2_18:2)	GL	TG	50	5	842.73	824.68939	[M+NH4]+	C53H92O6	70.4	11.16	25.28	7	9.08	7.56	18.96	14.68	14.52	1.984	16.68	17.76	10.04	15.24	17.76	C00422	-	-	-	-	-	-	ko00561,ko01100,ko04714,ko04923,ko04931,ko04975,ko04977,ko04979,ko05417
LIPID-P-2331	TG(18:1_16:2_20:5)	GL	TG	54	8	892.74	874.70504	[M+NH4]+	C57H94O6	9.24	1.968	4.52	1.308	2.64	4.36	5.36	2.264	5.32	0.716	13.92	7.08	4.48	6.84	7.6	C00422	-	-	-	-	-	-	ko00561,ko01100,ko04714,ko04923,ko04931,ko04975,ko04977,ko04979,ko05417
LIPID-P-2330	TG(18:1_17:2_19:2)	GL	TG	54	5	898.78	880.75199	[M+NH4]+	C57H100O6	4640	656	824	552	660	1168	1108	1620	1212	297.2	896	1072	1196	1036	1332	C00422	-	-	-	-	-	-	ko00561,ko01100,ko04714,ko04923,ko04931,ko04975,ko04977,ko04979,ko05417
LIPID-P-2329	TG(18:0_16:2_20:2)	GL	TG	54	4	900.8	882.76764	[M+NH4]+	C57H102O6	636	252	280	83.6	62	147.2	202	480	227.2	80.4	203.6	162.8	285.6	260	218.4	C00422	-	-	-	-	-	-	ko00561,ko01100,ko04714,ko04923,ko04931,ko04975,ko04977,ko04979,ko05417
LIPID-P-2327	TG(18:0_16:1_20:1)	GL	TG	54	2	904.81	886.79894	[M+NH4]+	C57H106O6	5600	1096	1776	1336	836	1208	2252	1712	3264	784	1360	2720	1692	2192	2700	C00422	-	-	-	-	-	-	ko00561,ko01100,ko04714,ko04923,ko04931,ko04975,ko04977,ko04979,ko05417
LIPID-P-2326	TG(18:1_17:2_18:2)	GL	TG	53	5	884.78	866.73634	[M+NH4]+	C56H98O6	45.6	10.92	11.88	8.76	8.56	10.32	13.72	14.84	19.4	2.9	11.16	17.24	19.32	13.8	22.16	C00422	-	-	-	-	-	-	ko00561,ko01100,ko04714,ko04923,ko04931,ko04975,ko04977,ko04979,ko05417
LIPID-P-2325	TG(18:0_17:1_18:1)	GL	TG	53	2	890.83	872.78329	[M+NH4]+	C56H104O6	3140	992	1736	1184	1092	1400	1948	2004	2148	508	920	2328	1360	972	1696	C00422	-	-	-	-	-	-	ko00561,ko01100,ko04714,ko04923,ko04931,ko04975,ko04977,ko04979,ko05417
LIPID-P-2323	TG(16:0_20:4_24:6)	GL	TG	60	10	972.8	954.76764	[M+NH4]+	C63H102O6	20.2	1.684	0.848	N/A	0.342	1.476	1.944	2.76	5.96	0.432	12.56	5.76	4.8	3.784	3.708	C00422	-	-	-	-	-	-	ko00561,ko01100,ko04714,ko04923,ko04931,ko04975,ko04977,ko04979,ko05417
LIPID-P-2322	TG(16:0_20:3_24:5)	GL	TG	60	8	976.82	958.79894	[M+NH4]+	C63H106O6	61.2	2.48	4.12	0.464	0.796	2.252	2.872	10	6.96	2.92	0.72	6.92	7.72	5.16	5.72	C00422	-	-	-	-	-	-	ko00561,ko01100,ko04714,ko04923,ko04931,ko04975,ko04977,ko04979,ko05417
LIPID-P-2321	TG(16:0_20:2_24:5)	GL	TG	60	7	978.86	960.81459	[M+NH4]+	C63H108O6	12.92	1.812	1.12	0.704	0.528	1.776	1.288	3.672	4.4	1.424	5.4	5.16	3.668	4.48	4.04	C00422	-	-	-	-	-	-	ko00561,ko01100,ko04714,ko04923,ko04931,ko04975,ko04977,ko04979,ko05417
LIPID-P-2319	TG(16:0_20:1_21:1)	GL	TG	57	2	946.88	928.84589	[M+NH4]+	C60H112O6	9.28	2.28	2.372	0.46	0.3456	0.54	1.668	2.872	2.988	0.396	3.472	1.32	2.26	2.504	3.724	C00422	-	-	-	-	-	-	ko00561,ko01100,ko04714,ko04923,ko04931,ko04975,ko04977,ko04979,ko05417
LIPID-P-2317	TG(16:0_20:0_22:6)	GL	TG	58	6	952.83	934.79894	[M+NH4]+	C61H106O6	227.6	19.6	26.28	7.44	7.4	25.48	24.8	84.8	66.8	14.8	22.72	48	37.96	56	53.6	C00422	-	-	-	-	-	-	ko00561,ko01100,ko04714,ko04923,ko04931,ko04975,ko04977,ko04979,ko05417
LIPID-P-2315	TG(16:0_19:1_20:2)	GL	TG	55	3	916.83	898.79894	[M+NH4]+	C58H106O6	94.8	14.56	33.16	10.76	10.52	12.52	29.68	49.2	47.2	8.68	10.68	39.68	28.36	20.32	19.52	C00422	-	-	-	-	-	-	ko00561,ko01100,ko04714,ko04923,ko04931,ko04975,ko04977,ko04979,ko05417
LIPID-P-2310	TG(16:0_16:2_20:5)	GL	TG	52	7	866.73	848.68939	[M+NH4]+	C55H92O6	20.4	2.6	2.76	0.752	1.628	3.108	2.576	2.136	5.92	0.752	10.76	4.44	6.72	5.92	6.2	C00422	-	-	-	-	-	-	ko00561,ko01100,ko04714,ko04923,ko04931,ko04975,ko04977,ko04979,ko05417
LIPID-P-0893	TG(12:0_16:0_18:2)	GL	TG	46	2	792.70697	774.67374	[M+NH4]+	C49H90O6	76	12.48	10.12	9	7.64	15.32	11.28	17.84	16.8	14.08	19.16	17.72	19.88	21.24	26.52	C00422	-	LMGL03013327	56937117	-	-	-	ko00561,ko01100,ko04714,ko04923,ko04931,ko04975,ko04977,ko04979,ko05417
LIPID-P-0784	TG(12:0_16:0_16:0)	GL	TG	44	0	768.70703	750.67374	[M+NH4]+	C47H90O6	33.16	3.068	6.12	2.496	3.436	3.16	2.668	6.24	4.32	7	4.4	3.876	4.52	7.12	7.68	C00422	HMDB0095566	LMGL03012664	101627647	-	-	-	ko00561,ko01100,ko04714,ko04923,ko04931,ko04975,ko04977,ko04979,ko05417
LIPID-P-1053	TG(18:1_18:1_18:2)	GL	TG	54	4	900.802016	882.76764	[M+NH4]+	C57H102O6	7560	1998	2120	854	1328	1736	2520	3200	3860	860	1846	3220	2060	3280	3380	C00422	HMDB0005455	LMGL03010288	25240371	-	-	-	ko00561,ko01100,ko04714,ko04923,ko04931,ko04975,ko04977,ko04979,ko05417
LIPID-P-1050	TG(15:0_19:2_19:2)	GL	TG	53	4	886.78705	868.75199	[M+NH4]+	C56H100O6	38	4.82	10.86	9.9	8.1	5.44	11.12	15.12	15.14	5.64	6.12	11.46	13.68	10.82	12.6	C00422	-	-	-	-	-	-	ko00561,ko01100,ko04714,ko04923,ko04931,ko04975,ko04977,ko04979,ko05417
LIPID-P-1049	TG(17:1_18:1_18:2)	GL	TG	53	4	886.7851	868.75199	[M+NH4]+	C56H100O6	356	31.2	67	72.4	78.2	57.2	36.8	87.2	156.8	24.2	37.8	118	81.8	89.2	113.2	C00422	-	LMGL03010190	-	-	-	-	ko00561,ko01100,ko04714,ko04923,ko04931,ko04975,ko04977,ko04979,ko05417
LIPID-P-1048	TG(16:0_18:2_18:2)	GL	TG	52	4	872.77008	854.73634	[M+NH4]+	C55H98O6	1800	162.4	556	536	1104	186.8	250.4	864	492	156	456	964	300.4	440	516	C00422	HMDB0005390	LMGL03010141	25240363	-	-	-	ko00561,ko01100,ko04714,ko04923,ko04931,ko04975,ko04977,ko04979,ko05417
LIPID-P-1046	TG(16:0_16:0_20:4)	GL	TG	52	4	872.77386	854.73634	[M+NH4]+	C55H98O6	476	33.16	39.6	14.24	30.44	38.48	64.8	70.8	84.8	18.16	194	123.6	94.4	93.6	90	C00422	HMDB0005363	LMGL03010160	9544125	-	-	-	ko00561,ko01100,ko04714,ko04923,ko04931,ko04975,ko04977,ko04979,ko05417
LIPID-P-1043	TG(16:1_17:1_18:2)	GL	TG	51	4	858.75183	840.72069	[M+NH4]+	C54H96O6	114.4	35.76	40.8	17.92	29.12	24	29.84	21.76	25.52	7.08	20.96	33.24	40.4	27.2	28.76	C00422	-	LMGL03010089	9544055	-	-	-	ko00561,ko01100,ko04714,ko04923,ko04931,ko04975,ko04977,ko04979,ko05417
LIPID-P-1042	TG(15:0_18:2_18:2)	GL	TG	51	4	858.755064	840.72069	[M+NH4]+	C54H96O6	122	49.6	36.56	27.88	23.36	39.72	25.32	40.8	41.6	10.6	26.76	38.56	41.6	30.72	42.4	C00422	HMDB0011711	LMGL03012907	53481043	-	-	-	ko00561,ko01100,ko04714,ko04923,ko04931,ko04975,ko04977,ko04979,ko05417
LIPID-P-1041	TG(16:0_16:1_18:3)	GL	TG	50	4	844.739416	826.70504	[M+NH4]+	C53H94O6	448	103.6	104.4	84	78.4	68.4	108.8	76.4	116.8	22.48	62	143.2	96	106	124	C00422	HMDB0044074	LMGL03010065	9544033	-	-	-	ko00561,ko01100,ko04714,ko04923,ko04931,ko04975,ko04977,ko04979,ko05417
LIPID-P-1040	TG(14:0_16:0_20:4)	GL	TG	50	4	844.74042	826.70504	[M+NH4]+	C53H94O6	107.2	4.8	13.32	4.32	6.88	13.08	10.84	11.92	37.52	4.44	77.2	18.12	34.44	24.6	23.4	C00422	HMDB0042140	LMGL03014237	56938026	-	-	-	ko00561,ko01100,ko04714,ko04923,ko04931,ko04975,ko04977,ko04979,ko05417
LIPID-P-1038	TG(16:1_16:1_18:2)	GL	TG	50	4	844.739416	826.70504	[M+NH4]+	C53H94O6	1352	214.4	309.2	166.8	148	161.2	219.2	273.2	224.4	53.6	160.8	391.6	225.6	248.8	307.2	C00422	HMDB0005435	LMGL03010064	25240359	-	-	-	ko00561,ko01100,ko04714,ko04923,ko04931,ko04975,ko04977,ko04979,ko05417
LIPID-P-1036	TG(14:0_18:2_18:2)	GL	TG	50	4	844.74042	826.70504	[M+NH4]+	C53H94O6	204	13.42	33.8	19.6	21.8	20	20.4	37.4	34	8.84	39	38.8	28.2	34.6	41.6	C00422	HMDB0042526	LMGL03012793	56936587	-	-	-	ko00561,ko01100,ko04714,ko04923,ko04931,ko04975,ko04977,ko04979,ko05417
LIPID-P-1035	TG(15:0_16:1_18:3)	GL	TG	49	4	830.72632	812.68939	[M+NH4]+	C52H92O6	15.64	1.332	2.58	1.128	1.544	1.864	2.412	2.304	4.28	0.298	3.036	1.156	2.232	3.368	1.996	C00422	HMDB0043207	LMGL03015037	56938823	-	-	-	ko00561,ko01100,ko04714,ko04923,ko04931,ko04975,ko04977,ko04979,ko05417
LIPID-P-1033	TG(14:0_16:1_18:3)	GL	TG	48	4	816.708116	798.67374	[M+NH4]+	C51H90O6	172	27.88	41.6	23.56	19.6	13.04	18.44	32.24	32.12	9.88	29.8	30.88	23.44	22.2	28.48	C00422	HMDB0042317	LMGL03014253	56938042	-	-	-	ko00561,ko01100,ko04714,ko04923,ko04931,ko04975,ko04977,ko04979,ko05417
LIPID-P-1054	TG(16:0_16:1_22:3)	GL	TG	54	4	900.802016	882.76764	[M+NH4]+	C57H102O6	88.8	25.96	33.56	6.12	10.12	19.6	23.6	68.4	56	21.56	28.64	21.2	25.96	25.6	39.12	C00422	-	LMGL03010369	9544333	-	-	-	ko00561,ko01100,ko04714,ko04923,ko04931,ko04975,ko04977,ko04979,ko05417
LIPID-P-1032	TG(12:0_18:1_18:3)	GL	TG	48	4	816.708116	798.67374	[M+NH4]+	C51H90O6	106	5.48	16.32	6.44	8.28	3.164	3.536	12.44	12.8	3.176	10.16	7.08	8.4	10.6	11.6	C00422	-	LMGL03013463	56937253	-	-	-	ko00561,ko01100,ko04714,ko04923,ko04931,ko04975,ko04977,ko04979,ko05417
LIPID-P-1030	TG(14:1_16:1_18:2)	GL	TG	48	4	816.70752	798.67374	[M+NH4]+	C51H90O6	146	13.28	14.72	11.36	10.28	12.6	11.84	16.84	18.48	4.4	18.76	19.56	16.24	12.24	20.44	C00422	HMDB0047916	LMGL03014658	56938447	-	-	-	ko00561,ko01100,ko04714,ko04923,ko04931,ko04975,ko04977,ko04979,ko05417
LIPID-P-1029	TG(16:1_16:1_16:2)	GL	TG	48	4	816.70532	798.67374	[M+NH4]+	C51H90O6	104.4	18	24.52	14.56	15.88	13.96	12.12	29.92	18.32	3.336	22.32	21.48	17.6	14.08	23.84	C00422	-	-	-	-	-	-	ko00561,ko01100,ko04714,ko04923,ko04931,ko04975,ko04977,ko04979,ko05417
LIPID-P-1024	TG(18:1_20:1_24:1)	GL	TG	62	3	1014.94324	996.90849	[M+NH4]+	C65H120O6	2.456	1.312	2.924	N/A	N/A	0.412	0.856	1.576	1.848	0.16	1.644	3.004	1.908	1.344	1.892	C00422	HMDB0049308	-	131760105	-	-	-	ko00561,ko01100,ko04714,ko04923,ko04931,ko04975,ko04977,ko04979,ko05417
LIPID-P-1023	TG(18:1_18:1_26:1)	GL	TG	62	3	1014.93158	996.90849	[M+NH4]+	C65H120O6	2.94	1.152	2.66	0.268	0.234	0.598	1.102	1.406	1.158	0.1348	2.5	2.86	1.574	1.414	2.12	C00422	-	-	-	-	-	-	ko00561,ko01100,ko04714,ko04923,ko04931,ko04975,ko04977,ko04979,ko05417
LIPID-P-1021	TG(18:1_22:0_20:2)	GL	TG	60	3	986.911566	968.87719	[M+NH4]+	C63H116O6	1.612	0.552	0.752	N/A	N/A	N/A	0.27	0.44	0.5	N/A	0.648	0.572	0.404	0.524	0.716	C00422	HMDB0049185	LMGL03011338	9545299	-	-	-	ko00561,ko01100,ko04714,ko04923,ko04931,ko04975,ko04977,ko04979,ko05417
LIPID-P-1020	TG(24:0_18:1_18:2)	GL	TG	60	3	986.91034	968.87719	[M+NH4]+	C63H116O6	1.784	0.56	0.924	0.468	0.4	0.652	0.62	0.468	0.964	0.2084	1.844	1.556	1.012	0.844	1.424	C00422	HMDB0047230	-	131758073	-	-	-	ko00561,ko01100,ko04714,ko04923,ko04931,ko04975,ko04977,ko04979,ko05417
LIPID-P-1017	TG(18:1_18:1_24:1)	GL	TG	60	3	986.9054	968.87719	[M+NH4]+	C63H116O6	21.4	7.96	13.32	1.106	1.132	3.4	6.8	6.02	8.82	0.716	9.56	17.6	7.62	8.14	6.22	C00422	HMDB0049266	-	131760063	-	-	-	ko00561,ko01100,ko04714,ko04923,ko04931,ko04975,ko04977,ko04979,ko05417
LIPID-P-1016	TG(18:1_20:1_22:1)	GL	TG	60	3	986.91168	968.87719	[M+NH4]+	C63H116O6	94.4	49.6	69.2	5.48	5.6	14.16	36.08	34.48	43.6	5.24	36.68	73.2	33.16	39.48	40.4	C00422	HMDB0049924	LMGL03011348	131760687	-	-	-	ko00561,ko01100,ko04714,ko04923,ko04931,ko04975,ko04977,ko04979,ko05417
LIPID-P-1011	TG(18:1_20:1_20:1)	GL	TG	58	3	958.880266	940.84589	[M+NH4]+	C61H112O6	498	169.6	134.4	26.8	17.28	39	120.4	220	236	26.4	32.2	134.8	92.6	120.4	147.2	C00422	HMDB0005457	LMGL03010787	9544748	-	-	-	ko00561,ko01100,ko04714,ko04923,ko04931,ko04975,ko04977,ko04979,ko05417
LIPID-P-1010	TG(18:1_18:2_22:0)	GL	TG	58	3	958.8761	940.84589	[M+NH4]+	C61H112O6	6.44	2.54	3.76	0.72	0.672	1.14	3.4	1.796	3.46	0.3608	6.84	3.484	3.632	2.812	4.76	C00422	-	LMGL03010969	-	-	-	-	ko00561,ko01100,ko04714,ko04923,ko04931,ko04975,ko04977,ko04979,ko05417
LIPID-P-1009	TG(18:1_18:1_22:1)	GL	TG	58	3	958.87683	940.84589	[M+NH4]+	C61H112O6	232	183.2	167.2	15.72	15.12	35	126	87.2	104.4	17.04	45.2	110.4	86.8	83.6	122.4	C00422	HMDB0010466	LMGL03010976	25240385	-	-	-	ko00561,ko01100,ko04714,ko04923,ko04931,ko04975,ko04977,ko04979,ko05417
LIPID-P-1007	TG(16:1_18:1_24:1)	GL	TG	58	3	958.87244	940.84589	[M+NH4]+	C61H112O6	9.44	6.72	5.08	0.94	0.68	2.068	5.16	4.08	4.48	0.444	7	7.4	5.6	3.34	6	C00422	-	-	-	-	-	-	ko00561,ko01100,ko04714,ko04923,ko04931,ko04975,ko04977,ko04979,ko05417
LIPID-P-1001	TG(20:1_18:2_18:0)	GL	TG	56	3	930.84247	912.81459	[M+NH4]+	C59H108O6	270	51.2	56.4	15.84	18.68	37.76	76.4	128.8	78.4	25	40.8	113.6	70	60.8	79.2	C00422	HMDB0005410	LMGL03010483	25240377	-	-	-	ko00561,ko01100,ko04714,ko04923,ko04931,ko04975,ko04977,ko04979,ko05417
LIPID-P-1031	TG(12:0_18:2_18:2)	GL	TG	48	4	816.708116	798.67374	[M+NH4]+	C51H90O6	16.88	0.76	1.988	0.698	1.36	1.144	1.026	3.04	3.74	1.056	1.46	1.608	1.318	2.3	2.14	C00422	-	LMGL03012671	56936469	-	-	-	ko00561,ko01100,ko04714,ko04923,ko04931,ko04975,ko04977,ko04979,ko05417
LIPID-P-1055	TG(14:0_20:0_20:4)	GL	TG	54	4	900.802016	882.76764	[M+NH4]+	C57H102O6	32.16	5.04	11.72	3.696	2.192	4.92	6.84	18.92	16.32	5.92	5.08	5.68	13.64	11.56	13.96	C00422	HMDB0042200	LMGL03014484	56938273	-	-	-	ko00561,ko01100,ko04714,ko04923,ko04931,ko04975,ko04977,ko04979,ko05417
LIPID-P-1056	TG(16:0_18:0_20:4)	GL	TG	54	4	900.802016	882.76764	[M+NH4]+	C57H102O6	86	25.56	14	20.68	18.72	39.2	61.6	22.32	81.2	9.64	54.8	35.16	50.8	52.8	30.64	C00422	HMDB0005370	LMGL03010315	9544279	-	-	-	ko00561,ko01100,ko04714,ko04923,ko04931,ko04975,ko04977,ko04979,ko05417
LIPID-P-1057	TG(17:1_18:1_20:2)	GL	TG	55	4	914.81274	896.78329	[M+NH4]+	C58H104O6	924	121.2	202	103.6	104	157.6	162	305.2	404	75.6	90	274	218.4	294	208.4	C00422	-	LMGL03010392	-	-	-	-	ko00561,ko01100,ko04714,ko04923,ko04931,ko04975,ko04977,ko04979,ko05417
LIPID-P-1107	TG(16:0_17:0_22:5)	GL	TG	55	5	912.79401	894.76764	[M+NH4]+	C58H102O6	22.56	3.532	2.408	1.284	1.44	4.28	3.664	9.48	8.16	2.056	10	4.8	5.44	5.24	6.28	C00422	-	LMGL03010584	9544546	-	-	-	ko00561,ko01100,ko04714,ko04923,ko04931,ko04975,ko04977,ko04979,ko05417
LIPID-P-1106	TG(16:1_18:1_20:3)	GL	TG	54	5	898.786366	880.75199	[M+NH4]+	C57H100O6	952	222.4	289.2	116.4	80	120	280.8	472	302.4	71.6	200.8	404	201.2	232	332.8	C00422	HMDB0048643	LMGL03010352	9544316	-	-	-	ko00561,ko01100,ko04714,ko04923,ko04931,ko04975,ko04977,ko04979,ko05417
LIPID-P-1105	TG(16:0_18:1_20:4)	GL	TG	54	5	898.786366	880.75199	[M+NH4]+	C57H100O6	4200	484	864	239.6	488	1084	556	784	740	186	2248	1384	584	768	1024	C00422	HMDB0005385	LMGL03010355	9544319	-	-	-	ko00561,ko01100,ko04714,ko04923,ko04931,ko04975,ko04977,ko04979,ko05417
LIPID-P-1104	TG(18:1_18:2_18:2)	GL	TG	54	5	898.786366	880.75199	[M+NH4]+	C57H100O6	1252	138	258	242	286	135.6	170.6	630	256	104	332	404	186.6	338	306	C00422	HMDB0005461	LMGL03010327	25240373	-	-	-	ko00561,ko01100,ko04714,ko04923,ko04931,ko04975,ko04977,ko04979,ko05417
LIPID-P-1102	TG(15:0_18:1_20:4)	GL	TG	53	5	884.77124	866.73634	[M+NH4]+	C56H98O6	86.4	15.88	34.16	11.48	6.8	25.44	17.6	25.6	26.36	4.64	67.6	38.28	25.48	30.36	42.8	C00422	HMDB0043268	LMGL03015156	56938938	-	-	-	ko00561,ko01100,ko04714,ko04923,ko04931,ko04975,ko04977,ko04979,ko05417
LIPID-P-1101	TG(17:1_18:2_18:2)	GL	TG	53	5	884.770714	866.73634	[M+NH4]+	C56H98O6	28	3.26	7.2	3.94	4.44	7.72	6.52	5.34	8.96	3.18	8.64	6.92	5.02	8.14	5.7	C00422	-	LMGL03010218	9544183	-	-	-	ko00561,ko01100,ko04714,ko04923,ko04931,ko04975,ko04977,ko04979,ko05417
LIPID-P-1100	TG(16:0_17:1_20:4)	GL	TG	53	5	884.77124	866.73634	[M+NH4]+	C56H98O6	29.2	5.24	9.52	2.176	3.096	6.36	6.2	8.16	5.16	1.232	11.84	9.52	7.24	6.28	9.68	C00422	-	LMGL03010244	9544209	-	-	-	ko00561,ko01100,ko04714,ko04923,ko04931,ko04975,ko04977,ko04979,ko05417
LIPID-P-1098	TG(16:0_16:1_20:4)	GL	TG	52	5	870.755066	852.72069	[M+NH4]+	C55H96O6	632	169.6	121.6	68	77.2	124.4	152.4	99.6	181.2	32.12	708	267.2	192.8	313.6	250.4	C00422	HMDB0005380	LMGL03010185	9544150	-	-	-	ko00561,ko01100,ko04714,ko04923,ko04931,ko04975,ko04977,ko04979,ko05417
LIPID-P-1097	TG(16:1_18:1_18:3)	GL	TG	52	5	870.74597	852.72069	[M+NH4]+	C55H96O6	398	176.8	201.6	90.8	126	98	177.6	148.4	194.8	49.6	201.2	248	176.4	151.2	159.6	C00422	HMDB0048648	LMGL03010168	9544133	-	-	-	ko00561,ko01100,ko04714,ko04923,ko04931,ko04975,ko04977,ko04979,ko05417
LIPID-P-1096	TG(16:0_18:2_18:3)	GL	TG	52	5	870.75208	852.72069	[M+NH4]+	C55H96O6	250	60.8	99.6	29.68	64	74	68.4	45.6	61.2	20.88	186.4	126.4	107.2	85.2	87.2	C00422	HMDB0044263	LMGL03010167	25240367	-	-	-	ko00561,ko01100,ko04714,ko04923,ko04931,ko04975,ko04977,ko04979,ko05417
LIPID-P-1095	TG(16:1_18:2_18:2)	GL	TG	52	5	870.75372	852.72069	[M+NH4]+	C55H96O6	414	79.6	145.4	24.8	65.6	74.4	87.4	136.6	140.4	17	88.4	139.6	105.6	89.4	144.6	C00422	HMDB0005446	LMGL03010163	25240366	-	-	-	ko00561,ko01100,ko04714,ko04923,ko04931,ko04975,ko04977,ko04979,ko05417
LIPID-P-1094	TG(16:1_17:1_18:3)	GL	TG	51	5	856.7395	838.70504	[M+NH4]+	C54H94O6	14.08	1.912	3.948	2.676	2.712	4.08	4.48	1.32	2.516	0.84	3.528	3.452	2.004	2.724	3.524	C00422	-	LMGL03010108	9544073	-	-	-	ko00561,ko01100,ko04714,ko04923,ko04931,ko04975,ko04977,ko04979,ko05417
LIPID-P-1092	TG(15:0_18:2_18:3)	GL	TG	51	5	856.7356	838.70504	[M+NH4]+	C54H94O6	10.76	1.816	3.712	1.032	1.732	2.368	1.752	1.828	2.772	0.46	1.944	2.416	2.18	2.888	1.896	C00422	HMDB0043410	LMGL03015166	56938948	-	-	-	ko00561,ko01100,ko04714,ko04923,ko04931,ko04975,ko04977,ko04979,ko05417
LIPID-P-1090	TG(14:0_16:1_20:4)	GL	TG	50	5	842.723766	824.68939	[M+NH4]+	C53H92O6	123.6	9.44	8.56	5.56	8.88	10	8.6	8.92	29	4.28	67.2	16.88	15.72	28.16	26.08	C00422	HMDB0042320	LMGL03014262	56938051	-	-	-	ko00561,ko01100,ko04714,ko04923,ko04931,ko04975,ko04977,ko04979,ko05417
LIPID-P-1089	TG(12:0_16:0_22:5)	GL	TG	50	5	842.72583	824.68939	[M+NH4]+	C53H92O6	39.08	3.16	7.64	2.296	2.316	5.4	3.392	3.764	6.24	1.484	17.56	6.88	7.84	5.68	9.6	C00422	-	LMGL03013345	56937135	-	-	-	ko00561,ko01100,ko04714,ko04923,ko04931,ko04975,ko04977,ko04979,ko05417
LIPID-P-1058	TG(17:0_19:2_19:2)	GL	TG	55	4	914.81628	896.78329	[M+NH4]+	C58H104O6	120.6	32.4	40.6	27	15.86	26.4	31.6	57.6	80.6	15.98	14.18	54	49.6	55.8	61.4	C00422	-	-	-	-	-	-	ko00561,ko01100,ko04714,ko04923,ko04931,ko04975,ko04977,ko04979,ko05417
LIPID-P-1060	TG(16:0_18:1_22:3)	GL	TG	56	4	928.83008	910.79894	[M+NH4]+	C59H106O6	4400	1140	1252	339.2	260.4	464	816	2440	1692	580	528	1136	1560	1008	1056	C00422	-	LMGL03010636	-	-	-	-	ko00561,ko01100,ko04714,ko04923,ko04931,ko04975,ko04977,ko04979,ko05417
LIPID-P-1062	TG(18:0_18:1_20:3)	GL	TG	56	4	928.83112	910.79894	[M+NH4]+	C59H106O6	424	64.4	97.6	40.8	32.76	70.4	91.6	152.4	238	29.2	108.4	106.4	135.6	104	140.4	C00422	HMDB0044953	LMGL03010551	9544513	-	-	-	ko00561,ko01100,ko04714,ko04923,ko04931,ko04975,ko04977,ko04979,ko05417
LIPID-P-1063	TG(16:1_18:1_22:2)	GL	TG	56	4	928.81775	910.79894	[M+NH4]+	C59H106O6	21.6	12.2	16.84	1.36	1.084	2.324	9.84	14.6	5.44	3.9	5.12	9.2	11.56	8.32	12.16	C00422	HMDB0048645	LMGL03010772	9544733	-	-	-	ko00561,ko01100,ko04714,ko04923,ko04931,ko04975,ko04977,ko04979,ko05417
LIPID-P-1065	TG(18:1_18:2_20:1)	GL	TG	56	4	928.81982	910.79894	[M+NH4]+	C59H106O6	524	236	307.6	75.6	79.2	157.2	125.2	408	286	56.4	135.6	244.8	179.2	181.6	196.8	C00422	HMDB0005460	LMGL03010538	25240379	-	-	-	ko00561,ko01100,ko04714,ko04923,ko04931,ko04975,ko04977,ko04979,ko05417
LIPID-P-1066	TG(17:1_18:1_22:2)	GL	TG	57	4	942.84344	924.81459	[M+NH4]+	C60H108O6	70.4	12.24	23.24	3.968	2.516	10.52	23.72	44.4	32.6	9.32	9.76	15.68	23.12	34.92	35.36	C00422	-	LMGL03010914	9544875	-	-	-	ko00561,ko01100,ko04714,ko04923,ko04931,ko04975,ko04977,ko04979,ko05417
LIPID-P-1000	TG(16:1_18:1_22:1)	GL	TG	56	3	930.84247	912.81459	[M+NH4]+	C59H108O6	30.12	50.8	44.4	5.44	3.468	10.32	26.96	25.8	13.96	2.892	20.48	18.96	27	17.56	23.44	C00422	HMDB0048638	LMGL03010633	131759458	-	-	-	ko00561,ko01100,ko04714,ko04923,ko04931,ko04975,ko04977,ko04979,ko05417
LIPID-P-1069	TG(18:1_22:1_18:2)	GL	TG	58	4	956.86292	938.83024	[M+NH4]+	C61H110O6	18.32	17.08	18.6	1.912	1.744	2.12	11.72	6.28	10.6	0.988	7.6	13.52	9.16	7.12	8.4	C00422	HMDB0049351	-	131760148	-	-	-	ko00561,ko01100,ko04714,ko04923,ko04931,ko04975,ko04977,ko04979,ko05417
LIPID-P-1071	TG(18:1_18:1_22:2)	GL	TG	58	4	956.86188	938.83024	[M+NH4]+	C61H110O6	61.6	13.6	26.36	6.4	3.708	8.36	13.8	29.88	26.16	6.92	18.32	28.88	21.64	19.68	30.12	C00422	HMDB0049911	LMGL03011138	131760681	-	-	-	ko00561,ko01100,ko04714,ko04923,ko04931,ko04975,ko04977,ko04979,ko05417
LIPID-P-1075	TG(18:1_24:1_18:2)	GL	TG	60	4	984.89502	966.86154	[M+NH4]+	C63H114O6	44.8	7.24	10.44	2.072	2.076	3.904	8.4	12.52	11.72	1.696	12.6	20.4	12.44	10.76	12.36	C00422	HMDB0049372	-	131760169	-	-	-	ko00561,ko01100,ko04714,ko04923,ko04931,ko04975,ko04977,ko04979,ko05417
LIPID-P-1081	TG(16:0_16:2_16:3)	GL	TG	48	5	814.692466	796.65809	[M+NH4]+	C51H88O6	31.24	4.92	6.56	4.6	1.948	3.024	4.32	4.2	6.04	1.416	5.92	3.8	5	4.84	4.36	C00422	-	-	-	-	-	-	ko00561,ko01100,ko04714,ko04923,ko04931,ko04975,ko04977,ko04979,ko05417
LIPID-P-1083	TG(14:1_16:1_18:3)	GL	TG	48	5	814.692466	796.65809	[M+NH4]+	C51H88O6	11.04	2.508	2.916	1.364	1.204	1.232	2.24	2.388	2.444	0.74	1.776	0.872	2.328	3.276	3.896	C00422	HMDB0047917	LMGL03014659	56938448	-	-	-	ko00561,ko01100,ko04714,ko04923,ko04931,ko04975,ko04977,ko04979,ko05417
LIPID-P-1086	TG(16:1_16:1_18:3)	GL	TG	50	5	842.71686	824.68939	[M+NH4]+	C53H92O6	63.4	15.3	14.64	8.3	6.96	9.72	12.72	13.28	13.3	3.58	15.92	17.2	10.44	17.72	14.7	C00422	HMDB0048604	LMGL03010078	9544045	-	-	-	ko00561,ko01100,ko04714,ko04923,ko04931,ko04975,ko04977,ko04979,ko05417
LIPID-P-1087	TG(14:0_18:2_18:3)	GL	TG	50	5	842.723766	824.68939	[M+NH4]+	C53H92O6	95.2	11.6	17.72	5.4	7.68	11.32	9.76	11.52	14.52	2.744	15.32	13.28	7.92	13.4	12.24	C00422	HMDB0010471	LMGL03014382	53480527	-	-	-	ko00561,ko01100,ko04714,ko04923,ko04931,ko04975,ko04977,ko04979,ko05417
LIPID-P-1070	TG(18:0_18:1_22:3)	GL	TG	58	4	956.85828	938.83024	[M+NH4]+	C61H110O6	107.2	12.6	13.8	7.52	5.68	12.24	20.04	43.6	64	10.6	26.32	35.08	23.48	26.24	32.68	C00422	-	LMGL03010982	9544943	-	-	-	ko00561,ko01100,ko04714,ko04923,ko04931,ko04975,ko04977,ko04979,ko05417
LIPID-P-1108	TG(17:0_18:1_20:4)	GL	TG	55	5	912.79803	894.76764	[M+NH4]+	C58H102O6	103.6	13.2	18.12	5.44	8.96	22.8	15.88	13.04	27.76	4.04	52.4	34.56	24.12	28.72	25.48	C00422	-	LMGL03010448	-	-	-	-	ko00561,ko01100,ko04714,ko04923,ko04931,ko04975,ko04977,ko04979,ko05417
LIPID-P-0999	TG(18:1_18:1_20:1)	GL	TG	56	3	930.8479	912.81459	[M+NH4]+	C59H108O6	3488	1544	2624	1160	548	1688	2444	4000	3440	544	860	2340	2092	2744	2208	C00422	HMDB0005454	LMGL03010484	9544447	-	-	-	ko00561,ko01100,ko04714,ko04923,ko04931,ko04975,ko04977,ko04979,ko05417
LIPID-P-0994	TG(18:1_18:1_19:1)	GL	TG	55	3	916.8194	898.79894	[M+NH4]+	C58H106O6	1414	218	434	302	168.8	256	238	664	664	140.6	100.4	470	490	320	298	C00422	-	LMGL03013031	-	-	-	-	ko00561,ko01100,ko04714,ko04923,ko04931,ko04975,ko04977,ko04979,ko05417
LIPID-P-0935	TG(16:0_18:1_22:1)	GL	TG	56	2	932.86023	914.83024	[M+NH4]+	C59H110O6	174.8	177.6	148.8	18.96	18.32	28.96	82.4	64.8	103.6	9.12	60.8	80	90.8	95.6	103.6	C00422	HMDB0044120	LMGL03010572	9544534	-	-	-	ko00561,ko01100,ko04714,ko04923,ko04931,ko04975,ko04977,ko04979,ko05417
LIPID-P-0934	TG(18:0_18:2_20:0)	GL	TG	56	2	932.864616	914.83024	[M+NH4]+	C59H110O6	220	191.6	116	30.28	18.08	44.8	119.6	48	170.4	9.2	59.6	137.6	118.8	128	131.2	C00422	HMDB0005409	LMGL03010427	9544390	-	-	-	ko00561,ko01100,ko04714,ko04923,ko04931,ko04975,ko04977,ko04979,ko05417
LIPID-P-0933	TG(18:0_18:1_20:1)	GL	TG	56	2	932.8656	914.83024	[M+NH4]+	C59H110O6	672	184	127.6	64.4	46.4	84	161.6	238	404	56	85.6	206.8	235.6	256.4	276.4	C00422	HMDB0005404	LMGL03010434	25240375	-	-	-	ko00561,ko01100,ko04714,ko04923,ko04931,ko04975,ko04977,ko04979,ko05417
LIPID-P-0931	TG(16:0_18:1_21:1)	GL	TG	55	2	918.84564	900.81459	[M+NH4]+	C58H108O6	62.4	34.36	35.76	4.96	5.28	9.2	20	26.8	44.8	2.924	12.52	22.32	27.28	21.04	24.44	C00422	-	-	-	-	-	-	ko00561,ko01100,ko04714,ko04923,ko04931,ko04975,ko04977,ko04979,ko05417
LIPID-P-0929	TG(18:0_18:1_19:1)	GL	TG	55	2	918.84564	900.81459	[M+NH4]+	C58H108O6	159.6	58.8	77.2	29.52	26.16	31.28	46.8	85.2	103.6	12.96	20.96	60	58.4	45.2	62.4	C00422	-	LMGL03016144	-	-	-	-	ko00561,ko01100,ko04714,ko04923,ko04931,ko04975,ko04977,ko04979,ko05417
LIPID-P-0928	TG(15:0_18:1_22:1)	GL	TG	55	2	918.84167	900.81459	[M+NH4]+	C58H108O6	568	230.4	261.6	84.8	88.4	107.2	223.6	235.6	275.2	39.28	77.6	247.2	188.8	146.8	258.8	C00422	HMDB0043233	LMGL03015160	131754360	-	-	-	ko00561,ko01100,ko04714,ko04923,ko04931,ko04975,ko04977,ko04979,ko05417
LIPID-P-0927	TG(16:0_16:1_22:1)	GL	TG	54	2	904.833316	886.79894	[M+NH4]+	C57H106O6	10	17.32	9.2	1.724	1.38	4.28	14.04	11.88	5.56	1.392	11.44	7	10.08	7.32	7.16	C00422	HMDB0044064	LMGL03010325	9544289	-	-	-	ko00561,ko01100,ko04714,ko04923,ko04931,ko04975,ko04977,ko04979,ko05417
LIPID-P-0925	TG(16:1_18:0_20:1)	GL	TG	54	2	904.81213	886.79894	[M+NH4]+	C57H106O6	2264	2340	1764	984	592	1268	1936	2392	1316	496	800	1880	1736	1268	1196	C00422	HMDB0005424	LMGL03010235	9544200	-	-	-	ko00561,ko01100,ko04714,ko04923,ko04931,ko04975,ko04977,ko04979,ko05417
LIPID-P-0924	TG(16:0_18:1_20:1)	GL	TG	54	2	904.83606	886.79894	[M+NH4]+	C57H106O6	3992	1928	1760	1116	720	1364	1456	2128	1972	504	856	2128	1760	1572	1764	C00422	HMDB0005383	LMGL03010234	9544199	-	-	-	ko00561,ko01100,ko04714,ko04923,ko04931,ko04975,ko04977,ko04979,ko05417
LIPID-P-0923	TG(18:0_18:1_18:1)	GL	TG	54	2	904.833316	886.79894	[M+NH4]+	C57H106O6	1904	566	756	620	568	604	726	1150	708	284	724	1332	1066	1072	994	C00422	HMDB0005403	LMGL03010217	16058372	-	-	-	ko00561,ko01100,ko04714,ko04923,ko04931,ko04975,ko04977,ko04979,ko05417
LIPID-P-0922	TG(16:0_18:1_19:1)	GL	TG	53	2	890.8161	872.78329	[M+NH4]+	C56H104O6	892	293.2	408	204.4	172	436	520	380.4	472	67.2	132.8	476	424	302.4	301.2	C00422	-	LMGL03015729	56939511	-	-	-	ko00561,ko01100,ko04714,ko04923,ko04931,ko04975,ko04977,ko04979,ko05417
LIPID-P-0921	TG(17:0_18:1_18:1)	GL	TG	53	2	890.786364	872.78329	[M+NH4]+	C56H104O6	1292	532	720	976	340.4	924	792	704	1084	276.4	492	820	1008	564	852	C00422	HMDB0062701	LMGL03010138	9544103	-	-	-	ko00561,ko01100,ko04714,ko04923,ko04931,ko04975,ko04977,ko04979,ko05417
LIPID-P-0937	TG(15:0_18:1_24:1)	GL	TG	57	2	946.87158	928.84589	[M+NH4]+	C60H112O6	33.44	44.4	56.8	3.276	3.396	7.08	27.36	19.52	38.8	1.7	8.64	12.56	23.04	27.16	20.16	C00422	HMDB0043234	-	131754361	-	-	-	ko00561,ko01100,ko04714,ko04923,ko04931,ko04975,ko04977,ko04979,ko05417
LIPID-P-0916	TG(16:0_18:0_18:2)	GL	TG	52	2	876.79034	858.76764	[M+NH4]+	C55H102O6	716	286	285.6	260	141.2	341.6	260.4	333.6	338.8	139.6	390.4	332.8	353.6	194	286.8	C00422	HMDB0005369	LMGL03010104	9544069	-	-	-	ko00561,ko01100,ko04714,ko04923,ko04931,ko04975,ko04977,ko04979,ko05417
LIPID-P-0913	TG(15:0_17:0_19:2)	GL	TG	51	2	862.78485	844.75199	[M+NH4]+	C54H100O6	1212	376	776	326	212.4	640	544	500	540	238	224	472	712	656	604	C00422	-	-	-	-	-	-	ko00561,ko01100,ko04714,ko04923,ko04931,ko04975,ko04977,ko04979,ko05417
LIPID-P-0912	TG(16:0_17:1_18:1)	GL	TG	51	2	862.78485	844.75199	[M+NH4]+	C54H100O6	2904	1240	2292	1772	860	1396	1436	1732	1056	452	568	1812	2084	1216	1720	C00422	-	LMGL03010061	-	-	-	-	ko00561,ko01100,ko04714,ko04923,ko04931,ko04975,ko04977,ko04979,ko05417
LIPID-P-0908	TG(15:0_16:1_18:1)	GL	TG	49	2	834.75488	816.72069	[M+NH4]+	C52H96O6	620	136.8	288.4	68	94	169.2	180.8	174.8	179.6	67.6	94	189.2	154	167.2	243.2	C00422	HMDB0043201	LMGL03015035	56938821	-	-	-	ko00561,ko01100,ko04714,ko04923,ko04931,ko04975,ko04977,ko04979,ko05417
LIPID-P-0907	TG(15:0_16:0_18:2)	GL	TG	49	2	834.75488	816.72069	[M+NH4]+	C52H96O6	116.8	26.12	36.52	18.68	19.88	37.84	34.84	26.6	29.48	17	30.36	54.8	23.04	30.16	41.6	C00422	HMDB0043032	LMGL03015011	56938800	-	-	-	ko00561,ko01100,ko04714,ko04923,ko04931,ko04975,ko04977,ko04979,ko05417
LIPID-P-0906	TG(16:0_16:1_17:1)	GL	TG	49	2	834.755064	816.72069	[M+NH4]+	C52H96O6	399.6	94.4	200.4	79.2	80.8	104.8	136	116.4	67.2	65.2	42.8	112	129.2	156	170.8	C00422	-	LMGL03010025	9543994	-	-	-	ko00561,ko01100,ko04714,ko04923,ko04931,ko04975,ko04977,ko04979,ko05417
LIPID-P-0903	TG(14:0_16:1_18:1)	GL	TG	48	2	820.739416	802.70504	[M+NH4]+	C51H94O6	5760	404	848	748	476	1036	944	520	1048	378.4	516	976	560	1032	940	C00422	HMDB0010420	LMGL03014251	53480485	-	-	-	ko00561,ko01100,ko04714,ko04923,ko04931,ko04975,ko04977,ko04979,ko05417
LIPID-P-0901	TG(16:0_16:1_16:1)	GL	TG	48	2	820.739416	802.70504	[M+NH4]+	C51H94O6	2836	648	1180	616	448	712	932	1228	1048	444	512	2496	472	796	872	C00422	HMDB0005376	LMGL03010018	-	-	-	-	ko00561,ko01100,ko04714,ko04923,ko04931,ko04975,ko04977,ko04979,ko05417
LIPID-P-0900	TG(14:0_16:1_17:1)	GL	TG	47	2	806.72247	788.68939	[M+NH4]+	C50H92O6	63.2	16.64	14.36	12.96	10.24	12.04	17.96	14.88	12.24	6.68	11.12	16.92	13.76	15.2	17.92	C00422	-	LMGL03014248	56938037	-	-	-	ko00561,ko01100,ko04714,ko04923,ko04931,ko04975,ko04977,ko04979,ko05417
LIPID-P-0899	TG(15:0_16:1_16:1)	GL	TG	47	2	806.723764	788.68939	[M+NH4]+	C50H92O6	132.4	28.24	34.84	20.04	14.88	19.36	21.88	18.08	19.44	9.84	14.88	21.96	22.64	27.84	34.48	C00422	HMDB0043199	LMGL03012901	131754326	-	-	-	ko00561,ko01100,ko04714,ko04923,ko04931,ko04975,ko04977,ko04979,ko05417
LIPID-P-0898	TG(14:0_15:0_18:2)	GL	TG	47	2	806.72247	788.68939	[M+NH4]+	C50H92O6	32.08	3.968	6.28	2.948	2.896	4.84	8.44	5.04	6.16	2.836	4.08	3.4	3.5	5.28	5.92	C00422	HMDB0042106	LMGL03014174	56937964	-	-	-	ko00561,ko01100,ko04714,ko04923,ko04931,ko04975,ko04977,ko04979,ko05417
LIPID-P-0894	TG(14:0_14:1_18:1)	GL	TG	46	2	792.708116	774.67374	[M+NH4]+	C49H90O6	504	74	67.6	41.6	56.8	93.2	30.6	42	69.2	53.6	45.2	64	78	107.2	109.2	C00422	HMDB0042281	LMGL03014145	56937935	-	-	-	ko00561,ko01100,ko04714,ko04923,ko04931,ko04975,ko04977,ko04979,ko05417
LIPID-P-0938	TG(19:0_18:1_20:1)	GL	TG	57	2	946.87158	928.84589	[M+NH4]+	C60H112O6	13.32	5.04	8.84	1.6	1.284	2.24	3.816	13.64	12.52	0.904	1.088	3.512	5.4	4.2	4.56	C00422	-	-	-	-	-	-	ko00561,ko01100,ko04714,ko04923,ko04931,ko04975,ko04977,ko04979,ko05417
LIPID-P-0939	TG(22:0_18:1_18:1)	GL	TG	58	2	960.89227	942.86154	[M+NH4]+	C61H114O6	14.76	9.56	16.8	1.756	1.468	3.244	9.48	5.4	11.72	1.036	11.76	13.44	7.8	6.2	8.04	C00422	HMDB0046485	-	131757406	-	-	-	ko00561,ko01100,ko04714,ko04923,ko04931,ko04975,ko04977,ko04979,ko05417
LIPID-P-0940	TG(18:0_22:0_18:2)	GL	TG	58	2	960.89301	942.86154	[M+NH4]+	C61H114O6	24.84	9.52	8.08	1.444	1.696	3.348	7.4	13.72	12.52	1.56	4.36	12	10.2	9.24	11.36	C00422	HMDB0044815	-	131755837	-	-	-	ko00561,ko01100,ko04714,ko04923,ko04931,ko04975,ko04977,ko04979,ko05417
LIPID-P-0993	TG(17:1_18:1_20:1)	GL	TG	55	3	916.82721	898.79894	[M+NH4]+	C58H106O6	138.4	64	55.6	37.64	16.64	31.36	51.6	62.4	97.6	14.28	24.64	62.8	51.2	48	31.64	C00422	-	LMGL03010344	-	-	-	-	ko00561,ko01100,ko04714,ko04923,ko04931,ko04975,ko04977,ko04979,ko05417
LIPID-P-0991	TG(16:0_18:1_20:2)	GL	TG	54	3	902.82343	884.78329	[M+NH4]+	C57H104O6	2532	868	664	263.2	297.2	464	488	1208	796	191.2	400	540	524	420	708	C00422	HMDB0044096	LMGL03010271	131755175	-	-	-	ko00561,ko01100,ko04714,ko04923,ko04931,ko04975,ko04977,ko04979,ko05417
LIPID-P-0990	TG(18:0_18:1_18:2)	GL	TG	54	3	902.817666	884.78329	[M+NH4]+	C57H104O6	1708	235.6	369.6	217.6	253.6	369.2	367.6	369.2	576	112	520	508	272.8	400	452	C00422	HMDB0005405	LMGL03010252	9544216	-	-	-	ko00561,ko01100,ko04714,ko04923,ko04931,ko04975,ko04977,ko04979,ko05417
LIPID-P-0988	TG(18:1_18:1_18:1)	GL	TG	54	3	902.81805	884.78329	[M+NH4]+	C57H104O6	15334.1	6320.32	6306.98	5733.62	2613.46	6346.98	5613.61	7773.72	7373.7	3253.5	2520.13	8520.43	6453.66	7853.73	5146.92	C00422	HMDB0005453	LMGL03010250	5497163	122-32-7	-	-	ko00561,ko01100,ko04714,ko04923,ko04931,ko04975,ko04977,ko04979,ko05417
LIPID-P-0984	TG(17:1_18:1_18:1)	GL	TG	53	3	888.802014	870.76764	[M+NH4]+	C56H102O6	936	638	1364	736	360	506	622	804	766	328	500	662	914	796	1174	C00422	-	LMGL03010161	-	-	-	-	ko00561,ko01100,ko04714,ko04923,ko04931,ko04975,ko04977,ko04979,ko05417
LIPID-P-0983	TG(14:0_18:1_20:2)	GL	TG	52	3	874.786366	856.75199	[M+NH4]+	C55H100O6	126.8	28.44	61.6	13.4	14.44	17.32	25.68	56.8	80	9.48	27.08	21.76	44	44.4	34.24	C00422	HMDB0042378	LMGL03014370	56938159	-	-	-	ko00561,ko01100,ko04714,ko04923,ko04931,ko04975,ko04977,ko04979,ko05417
LIPID-P-0982	TG(16:0_18:1_18:2)	GL	TG	52	3	874.78589	856.75199	[M+NH4]+	C55H100O6	11880	2304	4680	3020	3296	3568	2788	5560	5520	1360	2564	4560	5040	4840	4440	C00422	HMDB0005384	LMGL03010121	25240361	-	-	-	ko00561,ko01100,ko04714,ko04923,ko04931,ko04975,ko04977,ko04979,ko05417
LIPID-P-0981	TG(16:1_18:1_18:1)	GL	TG	52	3	874.78491	856.75199	[M+NH4]+	C55H100O6	12680	7320	7120	5280	3260	4200	5920	6840	7320	1296	2952	7200	4920	5680	5680	C00422	HMDB0005438	LMGL03010118	9544083	-	-	-	ko00561,ko01100,ko04714,ko04923,ko04931,ko04975,ko04977,ko04979,ko05417
LIPID-P-0979	TG(16:0_17:1_18:2)	GL	TG	51	3	860.77283	842.73634	[M+NH4]+	C54H98O6	193	39.6	43.2	46.8	25.2	56.2	59.4	72	47.4	12.02	22.2	99.2	56.4	31	46.2	C00422	-	LMGL03010075	9544042	-	-	-	ko00561,ko01100,ko04714,ko04923,ko04931,ko04975,ko04977,ko04979,ko05417
LIPID-P-0978	TG(15:0_18:1_18:2)	GL	TG	51	3	860.76984	842.73634	[M+NH4]+	C54H98O6	572	55.2	152.8	111.6	71.6	215.6	174.4	130.8	125.2	35.72	60.4	148	158.4	142.8	154.4	C00422	HMDB0011708	LMGL03015146	53481040	-	-	-	ko00561,ko01100,ko04714,ko04923,ko04931,ko04975,ko04977,ko04979,ko05417
LIPID-P-0977	TG(16:1_17:1_18:1)	GL	TG	51	3	860.7666	842.73634	[M+NH4]+	C54H98O6	504	464	608	206.4	211.6	255.6	296.4	368.8	281.6	102.4	117.6	236	266.8	376.8	283.2	C00422	-	LMGL03010073	9544040	-	-	-	ko00561,ko01100,ko04714,ko04923,ko04931,ko04975,ko04977,ko04979,ko05417
LIPID-P-0972	TG(14:0_17:1_18:2)	GL	TG	49	3	832.73694	814.70504	[M+NH4]+	C52H94O6	23.96	5.32	7.6	6.6	7.2	5.92	8.6	6.4	10.64	3.604	4.92	6.32	7.08	8.6	11.52	C00422	-	LMGL03014299	56938088	-	-	-	ko00561,ko01100,ko04714,ko04923,ko04931,ko04975,ko04977,ko04979,ko05417
LIPID-P-0971	TG(15:0_16:1_18:2)	GL	TG	49	3	832.73694	814.70504	[M+NH4]+	C52H94O6	193.2	18	34.6	18.48	34.24	25.48	35.16	20.48	40.4	7.6	19.76	40.8	27.44	40.4	49.6	C00422	-	LMGL03015036	56938822	-	-	-	ko00561,ko01100,ko04714,ko04923,ko04931,ko04975,ko04977,ko04979,ko05417
LIPID-P-0942	TG(16:0_18:1_24:1)	GL	TG	58	2	960.88605	942.86154	[M+NH4]+	C61H114O6	32.56	14.6	18.12	2.848	2.612	5.36	12.28	9.8	13.84	1.952	28.28	18.16	10.28	13.72	17.4	C00422	HMDB0044093	-	131755172	-	-	-	ko00561,ko01100,ko04714,ko04923,ko04931,ko04975,ko04977,ko04979,ko05417
LIPID-P-0944	TG(23:0_18:1_18:1)	GL	TG	59	2	974.90228	956.87719	[M+NH4]+	C62H116O6	2.52	0.9	1.362	0.526	0.498	0.8	0.896	0.962	0.754	0.258	1.148	2.02	1.54	1.076	1.254	C00422	-	-	-	-	-	-	ko00561,ko01100,ko04714,ko04923,ko04931,ko04975,ko04977,ko04979,ko05417
LIPID-P-0945	TG(24:0_18:1_18:1)	GL	TG	60	2	988.92389	970.89284	[M+NH4]+	C63H118O6	7.56	3.616	6.76	1.784	0.844	2.004	5	2.572	4.04	0.56	9.92	12.28	6.12	4.76	5.32	C00422	HMDB0047224	-	131758067	-	-	-	ko00561,ko01100,ko04714,ko04923,ko04931,ko04975,ko04977,ko04979,ko05417
LIPID-P-0946	TG(18:0_20:1_22:1)	GL	TG	60	2	988.927	970.89284	[M+NH4]+	C63H118O6	2.636	1.12	2.356	0.2536	0.2128	0.512	1.14	1.164	1.332	0.114	1.924	2.28	1.676	1.456	2.412	C00422	HMDB0044975	LMGL03011272	131755987	-	-	-	ko00561,ko01100,ko04714,ko04923,ko04931,ko04975,ko04977,ko04979,ko05417
LIPID-P-0947	TG(16:0_18:1_26:1)	GL	TG	60	2	988.91797	970.89284	[M+NH4]+	C63H118O6	2.436	0.864	1.076	0.504	0.284	0.44	0.884	0.82	0.664	0.174	2.704	2.004	1.36	1.616	2.236	C00422	-	-	-	-	-	-	ko00561,ko01100,ko04714,ko04923,ko04931,ko04975,ko04977,ko04979,ko05417
LIPID-P-0955	TG(14:1_14:1_16:1)	GL	TG	44	3	762.65607	744.62679	[M+NH4]+	C47H84O6	14.8	2.952	2.708	2.16	0.928	1.352	3.728	4.72	2.632	2.188	1.944	0.72	2.372	2.476	3.908	C00422	HMDB0047886	LMGL03012816	56936610	-	-	-	ko00561,ko01100,ko04714,ko04923,ko04931,ko04975,ko04977,ko04979,ko05417
LIPID-P-0997	TG(18:1_18:2_20:0)	GL	TG	56	3	930.848966	912.81459	[M+NH4]+	C59H108O6	79.2	28.08	33.88	3.608	4.92	10.6	27.2	28.8	38.8	5.84	35.92	59.2	45.2	27.48	31.36	C00422	HMDB0005459	LMGL03010478	25240376	-	-	-	ko00561,ko01100,ko04714,ko04923,ko04931,ko04975,ko04977,ko04979,ko05417
LIPID-P-0956	TG(8:0_18:1_18:2)	GL	TG	44	3	762.65674	744.62679	[M+NH4]+	C47H84O6	7.48	0.52	1.128	1.436	0.3728	0.844	1.412	2.016	1.12	0.772	1.42	0.72	1.544	1.064	1.76	C00422	-	-	-	-	-	-	ko00561,ko01100,ko04714,ko04923,ko04931,ko04975,ko04977,ko04979,ko05417
LIPID-P-0960	TG(14:1_16:1_16:1)	GL	TG	46	3	790.68787	772.65809	[M+NH4]+	C49H88O6	159.6	24.6	24.44	12	11.24	12.72	19.36	20.44	19	9.24	17.64	11.8	19.84	25.6	26.84	C00422	HMDB0047909	LMGL03012845	56936639	-	-	-	ko00561,ko01100,ko04714,ko04923,ko04931,ko04975,ko04977,ko04979,ko05417
LIPID-P-0961	TG(12:0_16:1_18:2)	GL	TG	46	3	790.69464	772.65809	[M+NH4]+	C49H88O6	114	9.12	17.24	7.12	8.48	4.6	8.8	10.88	11.64	5.68	12.04	6.76	13.48	15.12	15.16	C00422	-	LMGL03013352	-	-	-	-	ko00561,ko01100,ko04714,ko04923,ko04931,ko04975,ko04977,ko04979,ko05417
LIPID-P-0962	TG(10:0_18:1_18:2)	GL	TG	46	3	790.69043	772.65809	[M+NH4]+	C49H88O6	105.6	9.32	19.84	8.84	8.24	10.16	15.24	14.08	12.44	8.64	9.84	11.72	11.2	20.52	18.84	C00422	-	-	-	-	-	-	ko00561,ko01100,ko04714,ko04923,ko04931,ko04975,ko04977,ko04979,ko05417
LIPID-P-0965	TG(14:1_16:1_18:1)	GL	TG	48	3	818.723766	800.68939	[M+NH4]+	C51H92O6	924	148.8	142.8	91.6	100.8	119.6	144.4	174	144.8	54	111.6	195.6	168.4	212	271.6	C00422	HMDB0047911	LMGL03014657	56938446	-	-	-	ko00561,ko01100,ko04714,ko04923,ko04931,ko04975,ko04977,ko04979,ko05417
LIPID-P-0966	TG(14:0_16:1_18:2)	GL	TG	48	3	818.723766	800.68939	[M+NH4]+	C51H92O6	836	67.2	90	61.2	111.2	122.4	111.6	100.4	113.6	43.2	162.4	225.6	128.4	230.8	183.6	C00422	HMDB0042316	LMGL03014252	56938041	-	-	-	ko00561,ko01100,ko04714,ko04923,ko04931,ko04975,ko04977,ko04979,ko05417
LIPID-P-0969	TG(16:0_14:1_18:2)	GL	TG	48	3	818.72034	800.68939	[M+NH4]+	C51H92O6	364.4	69.2	79.6	52.4	54.4	34.84	68	57.6	64.4	29.8	64.8	141.6	71.2	101.2	84	C00422	HMDB0044038	-	131755125	-	-	-	ko00561,ko01100,ko04714,ko04923,ko04931,ko04975,ko04977,ko04979,ko05417
LIPID-P-0957	TG(10:0_16:0_18:3)	GL	TG	44	3	762.65912	744.62679	[M+NH4]+	C47H84O6	5.04	0.432	0.3944	0.392	0.1252	0.408	1.896	0.672	1.136	0.148	0.556	0.408	0.844	0.94	0.76	C00422	-	-	-	-	-	-	ko00561,ko01100,ko04714,ko04923,ko04931,ko04975,ko04977,ko04979,ko05417
LIPID-P-1109	TG(19:1_18:2_18:2)	GL	TG	55	5	912.79803	894.76764	[M+NH4]+	C58H102O6	18.12	3.88	5.86	3.42	3.46	4.72	4.86	11.16	9.72	2.28	3.28	7.04	6.62	5.22	8.36	C00422	-	LMGL03013039	56936829	-	-	-	ko00561,ko01100,ko04714,ko04923,ko04931,ko04975,ko04977,ko04979,ko05417
LIPID-P-1113	TG(18:0_18:3_20:2)	GL	TG	56	5	926.817666	908.78329	[M+NH4]+	C59H104O6	436	63.6	155.6	33	30.64	87.6	70.4	260.4	238.4	44.8	61.6	149.2	163.6	97.2	151.6	C00422	HMDB0045114	LMGL03010601	9544563	-	-	-	ko00561,ko01100,ko04714,ko04923,ko04931,ko04975,ko04977,ko04979,ko05417
LIPID-P-0852	TG(18:0_18:0_18:1)	GL	TG	54	1	906.848966	888.81459	[M+NH4]+	C57H108O6	688	43	46.8	36.2	35.2	51.2	85	101.8	256	31.8	67.4	210	101	120	130.8	C00422	HMDB0005395	LMGL03010188	16058371	-	-	-	ko00561,ko01100,ko04714,ko04923,ko04931,ko04975,ko04977,ko04979,ko05417
LIPID-P-0853	TG(16:0_20:0_18:1)	GL	TG	54	1	906.84589	888.81459	[M+NH4]+	C57H108O6	146.4	113.6	74.4	23.68	13.12	35.6	153.2	37.56	89.2	10.12	60	114.8	66	56.8	84.8	C00422	-	-	-	-	-	-	ko00561,ko01100,ko04714,ko04923,ko04931,ko04975,ko04977,ko04979,ko05417
LIPID-P-0854	TG(15:0_16:0_24:1)	GL	TG	55	1	920.85815	902.83024	[M+NH4]+	C58H110O6	5.8	9.96	9.48	N/A	0.696	N/A	13.28	2.504	4.92	N/A	N/A	N/A	2.836	4.2	4.84	C00422	HMDB0043031	-	131754165	-	-	-	ko00561,ko01100,ko04714,ko04923,ko04931,ko04975,ko04977,ko04979,ko05417
LIPID-P-0855	TG(16:0_18:1_21:0)	GL	TG	55	1	920.85529	902.83024	[M+NH4]+	C58H110O6	5.4	11.28	11.84	0.852	N/A	0.852	11.52	3.172	4.52	0.322	0.952	1.844	3.476	4.64	4.92	C00422	-	LMGL03010455	9544418	-	-	-	ko00561,ko01100,ko04714,ko04923,ko04931,ko04975,ko04977,ko04979,ko05417
LIPID-P-0856	TG(18:0_18:1_20:0)	GL	TG	56	1	934.87579	916.84589	[M+NH4]+	C59H112O6	17.68	7.2	9.64	1.376	0.908	2.144	9.76	4.84	7.52	1.204	10.64	12.16	4.64	7.2	7.08	C00422	HMDB0005402	LMGL03010382	9544345	-	-	-	ko00561,ko01100,ko04714,ko04923,ko04931,ko04975,ko04977,ko04979,ko05417
LIPID-P-0858	TG(16:0_18:1_22:0)	GL	TG	56	1	934.880266	916.84589	[M+NH4]+	C59H112O6	34.12	14.24	15.24	2.624	1.816	2.928	10.64	7.44	15.04	1.216	14.64	14.76	8.52	10.28	12.48	C00422	HMDB0044112	LMGL03010511	9544474	-	-	-	ko00561,ko01100,ko04714,ko04923,ko04931,ko04975,ko04977,ko04979,ko05417
LIPID-P-0861	TG(15:0_24:0_18:1)	GL	TG	57	1	948.88812	930.86154	[M+NH4]+	C60H114O6	2.712	N/A	N/A	0.326	0.3104	0.784	0.632	0.96	0.912	N/A	0.904	0.892	0.864	1.184	1.204	C00422	HMDB0043142	-	131754270	-	-	-	ko00561,ko01100,ko04714,ko04923,ko04931,ko04975,ko04977,ko04979,ko05417
LIPID-P-0862	TG(16:0_23:0_18:1)	GL	TG	57	1	948.89142	930.86154	[M+NH4]+	C60H114O6	2.332	N/A	N/A	0.676	0.2308	0.66	0.692	0.792	0.632	0.44	1.568	1.3	0.864	1.152	1.484	C00422	-	-	-	-	-	-	ko00561,ko01100,ko04714,ko04923,ko04931,ko04975,ko04977,ko04979,ko05417
LIPID-P-0868	TG(16:0_25:0_18:1)	GL	TG	59	1	976.91925	958.89284	[M+NH4]+	C62H118O6	0.856	0.452	0.496	0.2716	0.2328	0.216	0.348	0.2824	0.676	0.1088	0.432	0.3856	0.3904	0.464	0.412	C00422	-	-	-	-	-	-	ko00561,ko01100,ko04714,ko04923,ko04931,ko04975,ko04977,ko04979,ko05417
LIPID-P-0871	TG(16:0_26:0_18:1)	GL	TG	60	1	990.93573	972.90849	[M+NH4]+	C63H120O6	1.756	0.804	0.756	0.3504	0.3376	0.836	0.796	0.68	0.924	0.2744	2.948	1.2	1.068	1.108	1.64	C00422	-	-	-	-	-	-	ko00561,ko01100,ko04714,ko04923,ko04931,ko04975,ko04977,ko04979,ko05417
LIPID-P-0872	TG(18:0_20:1_22:0)	GL	TG	60	1	990.942864	972.90849	[M+NH4]+	C63H120O6	0.616	0.3688	0.2732	0.206	0.1744	0.22	0.2428	0.1844	0.536	N/A	1.64	1.024	0.708	0.452	0.632	C00422	HMDB0044967	LMGL03011188	9545303	-	-	-	ko00561,ko01100,ko04714,ko04923,ko04931,ko04975,ko04977,ko04979,ko05417
LIPID-P-0878	TG(8:0_16:1_18:1)	GL	TG	42	2	736.64581	718.61114	[M+NH4]+	C45H82O6	7.12	1.1	1.436	1.624	1.78	0.744	1.708	2.192	2.16	2.2	1.744	0.64	1.168	1.444	1.828	C00422	-	-	-	-	-	-	ko00561,ko01100,ko04714,ko04923,ko04931,ko04975,ko04977,ko04979,ko05417
LIPID-P-0884	TG(14:0_14:1_16:1)	GL	TG	44	2	764.67267	746.64244	[M+NH4]+	C47H86O6	192.8	19.92	23.96	15.52	14.44	8.96	24.36	24.32	15.2	18.08	8.08	15.04	14.12	20.96	20.12	C00422	HMDB0042279	LMGL03014140	131753421	-	-	-	ko00561,ko01100,ko04714,ko04923,ko04931,ko04975,ko04977,ko04979,ko05417
LIPID-P-0885	TG(10:0_16:0_18:2)	GL	TG	44	2	764.672	746.64244	[M+NH4]+	C47H86O6	70.4	7.84	11.08	8.52	5.68	8.16	14.64	11.72	8.84	8.16	7.88	9.08	7	12.28	12.72	C00422	-	-	-	-	-	-	ko00561,ko01100,ko04714,ko04923,ko04931,ko04975,ko04977,ko04979,ko05417
LIPID-P-0886	TG(12:0_14:0_18:2)	GL	TG	44	2	764.67566	746.64244	[M+NH4]+	C47H86O6	40.4	8.16	13.04	4.68	5.44	4.16	9.6	6.24	6.24	7.36	8.2	8.16	8.4	8.4	9.16	C00422	-	LMGL03013218	56937008	-	-	-	ko00561,ko01100,ko04714,ko04923,ko04931,ko04975,ko04977,ko04979,ko05417
LIPID-P-0890	TG(15:0_14:1_16:1)	GL	TG	45	2	778.69275	760.65809	[M+NH4]+	C48H88O6	20.76	2.788	2.692	1.412	1.128	1.012	2.492	4.36	2.832	2.42	2.48	2.72	2.756	3.484	2.204	C00422	HMDB0043170	-	131754297	-	-	-	ko00561,ko01100,ko04714,ko04923,ko04931,ko04975,ko04977,ko04979,ko05417
LIPID-P-0891	TG(12:0_15:0_18:2)	GL	TG	45	2	778.69275	760.65809	[M+NH4]+	C48H88O6	9	1.344	1.488	0.428	1.268	0.48	0.872	1.796	1.432	0.736	1.124	0.868	1.232	1.28	1.42	C00422	-	LMGL03013275	56937065	-	-	-	ko00561,ko01100,ko04714,ko04923,ko04931,ko04975,ko04977,ko04979,ko05417
LIPID-P-1244	TG(18:2_22:5_22:6)	GL	TG	62	13	994.78632	976.75199	[M+NH4]+	C65H100O6	75.6	6.2	10.36	1.552	5.84	16.56	7.4	7.24	37.36	3.212	42	83.6	18.04	21.24	24.28	C00422	HMDB0052739	LMGL03012400	9546359	-	-	-	ko00561,ko01100,ko04714,ko04923,ko04931,ko04975,ko04977,ko04979,ko05417
LIPID-P-1243	TG(18:2_20:5_22:6)	GL	TG	60	13	966.75488	948.72069	[M+NH4]+	C63H96O6	26.36	2.316	3.52	0.298	1.452	3.448	1.672	3.712	9.84	0.724	15.84	19.2	8.4	4.88	6.2	C00422	HMDB0052799	LMGL03012093	9546054	-	-	-	ko00561,ko01100,ko04714,ko04923,ko04931,ko04975,ko04977,ko04979,ko05417
LIPID-P-1242	TG(18:1_22:5_22:6)	GL	TG	62	12	996.80176	978.76764	[M+NH4]+	C65H102O6	41.2	2.116	2.692	0.42	0.892	4.44	3.332	4.4	7.36	1	7.2	16.24	4.24	7	5.4	C00422	HMDB0050259	LMGL03012366	9546325	-	-	-	ko00561,ko01100,ko04714,ko04923,ko04931,ko04975,ko04977,ko04979,ko05417
LIPID-P-1240	TG(16:0_22:6_22:6)	GL	TG	60	12	968.77057	950.73634	[M+NH4]+	C63H98O6	157.4	6.84	9.36	1.954	4.08	12.14	6.9	31	64.6	2.66	49	57	35.4	28.6	28.8	C00422	HMDB0044639	LMGL03012142	9546103	-	-	-	ko00561,ko01100,ko04714,ko04923,ko04931,ko04975,ko04977,ko04979,ko05417
LIPID-P-1239	TG(14:0_22:6_22:6)	GL	TG	58	12	940.73926	922.70504	[M+NH4]+	C61H94O6	10.52	0.174	0.646	0.262	0.296	0.818	0.332	0.536	1.924	0.107	3.66	2.82	1.792	0.97	1.656	C00422	HMDB0042929	LMGL03012812	56936606	-	-	-	ko00561,ko01100,ko04714,ko04923,ko04931,ko04975,ko04977,ko04979,ko05417
LIPID-P-1236	TG(18:1_20:4_22:6)	GL	TG	60	11	970.7818	952.75199	[M+NH4]+	C63H100O6	70.4	16.2	12.16	8.24	21.44	33.36	14.64	13.32	40	2.224	82	86.8	33.64	28.4	30.68	C00422	HMDB0049490	LMGL03011970	9545931	-	-	-	ko00561,ko01100,ko04714,ko04923,ko04931,ko04975,ko04977,ko04979,ko05417
LIPID-P-1235	TG(16:0_22:5_22:6)	GL	TG	60	11	970.78467	952.75199	[M+NH4]+	C63H100O6	144	5.2	8.08	0.756	3.768	2.116	5.16	29.76	45.6	4.72	5.84	10.72	13.84	15.92	14.2	C00422	HMDB0044471	LMGL03012086	9546047	-	-	-	ko00561,ko01100,ko04714,ko04923,ko04931,ko04975,ko04977,ko04979,ko05417
LIPID-P-1234	TG(18:2_20:4_20:5)	GL	TG	58	11	942.755064	924.72069	[M+NH4]+	C61H96O6	14.04	1.132	1.204	0.908	2.644	3.608	2.312	1.764	2.956	0.3468	17.2	6.36	3.616	6.08	4.28	C00422	HMDB0052692	LMGL03011398	9545359	-	-	-	ko00561,ko01100,ko04714,ko04923,ko04931,ko04975,ko04977,ko04979,ko05417
LIPID-P-1233	TG(18:2_18:3_22:6)	GL	TG	58	11	942.75507	924.72069	[M+NH4]+	C61H96O6	30.72	3.168	4.6	1.728	3.848	12.84	6.04	4.2	13.28	0.66	38.6	22.84	6.16	11.28	10.48	C00422	HMDB0052649	LMGL03011620	9545581	-	-	-	ko00561,ko01100,ko04714,ko04923,ko04931,ko04975,ko04977,ko04979,ko05417
LIPID-P-1231	TG(18:1_20:3_22:6)	GL	TG	60	10	972.80157	954.76764	[M+NH4]+	C63H102O6	31.36	3.344	5.4	1.744	1.652	4.8	2.276	4.8	8.4	1.704	13.44	19.92	9.48	6.96	7.72	C00422	HMDB0049343	LMGL03011905	9545866	-	-	-	ko00561,ko01100,ko04714,ko04923,ko04931,ko04975,ko04977,ko04979,ko05417
LIPID-P-1230	TG(18:0_20:4_22:6)	GL	TG	60	10	972.802016	954.76764	[M+NH4]+	C63H102O6	89.4	6.02	11.72	4.54	2.88	9.96	3.9	16.96	15.1	3.88	15.74	36	17.64	11.1	16.7	C00422	HMDB0045206	LMGL03011904	9545865	-	-	-	ko00561,ko01100,ko04714,ko04923,ko04931,ko04975,ko04977,ko04979,ko05417
LIPID-P-1229	TG(16:0_20:4_22:6)	GL	TG	58	10	944.770713	926.73634	[M+NH4]+	C61H98O6	17.3	4.02	4.5	1.748	3.96	7.54	2.22	7.26	14.62	0.352	27.2	11.98	12	6.74	9.54	C00422	HMDB0044387	LMGL03011537	9545497	-	-	-	ko00561,ko01100,ko04714,ko04923,ko04931,ko04975,ko04977,ko04979,ko05417
LIPID-P-0851	TG(16:0_18:0_20:1)	GL	TG	54	1	906.84711	888.81459	[M+NH4]+	C57H108O6	138.8	17.12	20.8	8.96	4.76	12.48	23.6	38.8	78.4	6.48	15.56	33.32	23.8	21.4	34.44	C00422	HMDB0005368	LMGL03010205	9544170	-	-	-	ko00561,ko01100,ko04714,ko04923,ko04931,ko04975,ko04977,ko04979,ko05417
LIPID-P-0850	TG(17:0_17:0_19:1)	GL	TG	53	1	892.82593	874.79894	[M+NH4]+	C56H106O6	32.36	2.26	4.84	2.212	2.508	3.56	6.08	7.28	11.24	1.796	3.928	5.68	7.64	5.2	8.64	C00422	-	LMGL03012999	56936791	-	-	-	ko00561,ko01100,ko04714,ko04923,ko04931,ko04975,ko04977,ko04979,ko05417
LIPID-P-0849	TG(17:0_18:0_18:1)	GL	TG	53	1	892.83057	874.79894	[M+NH4]+	C56H106O6	89.6	9.24	12.2	9.28	7.96	11.52	23.6	38.96	35.96	4.88	13.48	35.56	23.8	30.28	24.4	C00422	-	LMGL03010119	9544084	-	-	-	ko00561,ko01100,ko04714,ko04923,ko04931,ko04975,ko04977,ko04979,ko05417
LIPID-P-0848	TG(16:0_16:1_20:0)	GL	TG	52	1	878.817666	860.78329	[M+NH4]+	C55H104O6	13.88	22	15.92	2.484	2.192	5.28	13.44	4.52	8.52	1.42	14.16	11.36	12.52	7.36	10.84	C00422	HMDB0005375	LMGL03010095	9544061	-	-	-	ko00561,ko01100,ko04714,ko04923,ko04931,ko04975,ko04977,ko04979,ko05417
LIPID-P-0786	TG(14:0_16:0_16:0)	GL	TG	46	0	796.739416	778.70504	[M+NH4]+	C49H94O6	96.6	23	28.2	9.32	15.12	31.2	25.4	32.6	30	28	43	55.6	29.8	23.6	36.6	C00422	HMDB0010411	LMGL03012786	545606	-	-	-	ko00561,ko01100,ko04714,ko04923,ko04931,ko04975,ko04977,ko04979,ko05417
LIPID-P-0787	TG(15:0_16:0_16:0)	GL	TG	47	0	810.75201	792.72069	[M+NH4]+	C50H96O6	72	21.6	17.74	13.26	8.32	26.6	14.52	26.4	14.54	19.52	24.4	33.2	17.62	29	28.2	C00422	HMDB0043019	LMGL03012900	56936694	-	-	-	ko00561,ko01100,ko04714,ko04923,ko04931,ko04975,ko04977,ko04979,ko05417
LIPID-P-0788	TG(16:0_16:0_16:0)	GL	TG	48	0	824.770716	806.73634	[M+NH4]+	C51H98O6	250.667	45.4667	70.1333	38.4	38.6667	79.8667	61.8667	105.467	63.2	58.1333	85.7333	137.333	69.4667	106.4	122.267	C00422	HMDB0005356	LMGL03010001	11147	555-44-2	-	-	ko00561,ko01100,ko04714,ko04923,ko04931,ko04975,ko04977,ko04979,ko05417
LIPID-P-0793	TG(16:0_16:0_18:0)	GL	TG	50	0	852.802016	834.76764	[M+NH4]+	C53H102O6	262	44.4	94	77.6	52.2	62.8	103.6	123	150.6	66	112.8	118.8	134.2	121.2	121.4	C00422	HMDB0005357	LMGL03010004	99649112	-	-	-	ko00561,ko01100,ko04714,ko04923,ko04931,ko04975,ko04977,ko04979,ko05417
LIPID-P-0798	TG(14:0_18:0_20:0)	GL	TG	52	0	880.833316	862.79894	[M+NH4]+	C55H106O6	9.4	5.44	3.976	1.992	1.188	1.676	7.88	2.236	4.64	1.212	6.12	8.64	4.64	4.36	4.64	C00422	HMDB0042155	LMGL03014348	56938029	-	-	-	ko00561,ko01100,ko04714,ko04923,ko04931,ko04975,ko04977,ko04979,ko05417
LIPID-P-0800	TG(16:0_18:0_18:0)	GL	TG	52	0	880.833316	862.79894	[M+NH4]+	C55H106O6	75.6	26.8	21.4	26	16.02	31.2	28.6	28	49.4	25.8	32	58	37.2	50.6	35.6	C00422	HMDB0005365	LMGL03010069	99647664	-	-	-	ko00561,ko01100,ko04714,ko04923,ko04931,ko04975,ko04977,ko04979,ko05417
LIPID-P-0804	TG(18:0_18:0_18:0)	GL	TG	54	0	908.864616	890.83024	[M+NH4]+	C57H110O6	16	5.44	4.34667	4.12	4.21333	6.28	6.42667	4.8	8.12	5.82667	7.46667	6.93333	5.82667	6.52	7.86667	C00422	HMDB0005393	LMGL03010002	11146	-	-	-	ko00561,ko01100,ko04714,ko04923,ko04931,ko04975,ko04977,ko04979,ko05417
LIPID-P-0806	TG(16:0_18:0_20:0)	GL	TG	54	0	908.8609	890.83024	[M+NH4]+	C57H110O6	6.28	2.132	2.128	1.248	0.724	0.464	4.4	2.168	2.044	1.232	5.32	2.732	2.852	2.752	3	C00422	HMDB0005366	LMGL03010175	131750339	-	-	-	ko00561,ko01100,ko04714,ko04923,ko04931,ko04975,ko04977,ko04979,ko05417
LIPID-P-0810	TG(16:0_16:0_24:0)	GL	TG	56	0	936.89459	918.86154	[M+NH4]+	C59H114O6	0.936	0.604	0.424	0.412	0.2948	0.456	0.448	0.416	0.3	0.2816	1.304	0.668	0.684	0.5	0.44	C00422	HMDB0043889	-	131754998	-	-	-	ko00561,ko01100,ko04714,ko04923,ko04931,ko04975,ko04977,ko04979,ko05417
LIPID-P-0819	TG(8:0_16:0_16:1)	GL	TG	40	1	710.62518	692.59549	[M+NH4]+	C43H80O6	5	N/A	0.924	1.5	2.044	1.168	2.072	2.484	N/A	3.644	2.612	1.028	1.832	1.88	1.136	C00422	-	-	-	-	-	-	ko00561,ko01100,ko04714,ko04923,ko04931,ko04975,ko04977,ko04979,ko05417
LIPID-P-0820	TG(8:0_14:0_18:1)	GL	TG	40	1	710.62683	692.59549	[M+NH4]+	C43H80O6	5.72	0.448	1.16	0.334	0.58	0.612	0.788	1.84	0.608	1.228	0.844	0.976	1.356	1.012	1.056	C00422	-	-	-	-	-	-	ko00561,ko01100,ko04714,ko04923,ko04931,ko04975,ko04977,ko04979,ko05417
LIPID-P-0892	TG(14:1_16:0_16:1)	GL	TG	46	2	792.708116	774.67374	[M+NH4]+	C49H90O6	548	56.4	48.8	47.2	59.2	69.6	61.2	68	87.2	41.2	61.6	117.6	60	85.2	87.6	C00422	HMDB0047771	LMGL03014627	56938416	-	-	-	ko00561,ko01100,ko04714,ko04923,ko04931,ko04975,ko04977,ko04979,ko05417
LIPID-P-1111	TG(18:1_18:2_20:2)	GL	TG	56	5	926.81464	908.78329	[M+NH4]+	C59H104O6	600	52	79.2	29	23.76	80.4	110.8	212	203.2	43.6	52.4	170.4	156	159.6	132.4	C00422	HMDB0049395	LMGL03010602	131760192	-	-	-	ko00561,ko01100,ko04714,ko04923,ko04931,ko04975,ko04977,ko04979,ko05417
LIPID-P-0823	TG(12:0_14:0_16:1)	GL	TG	42	1	738.65991	720.62679	[M+NH4]+	C45H84O6	26.08	4.52	12.96	2.6	1.9	5.72	7.48	3.616	6.52	5.4	5.68	3.052	5.96	6.32	4.44	C00422	-	LMGL03013212	56937002	-	-	-	ko00561,ko01100,ko04714,ko04923,ko04931,ko04975,ko04977,ko04979,ko05417
LIPID-P-0827	TG(12:0_16:0_16:1)	GL	TG	44	1	766.692466	748.65809	[M+NH4]+	C47H88O6	84	13.96	13.48	11.44	13.28	11.4	18.04	17.88	17.92	15.96	19.04	24.24	16.6	20.16	25.04	C00422	-	LMGL03013322	56937112	-	-	-	ko00561,ko01100,ko04714,ko04923,ko04931,ko04975,ko04977,ko04979,ko05417
LIPID-P-0828	TG(10:0_16:0_18:1)	GL	TG	44	1	766.692466	748.65809	[M+NH4]+	C47H88O6	98.8	23.32	13.76	15.4	13.24	19.56	38.76	30.48	28.28	20.2	12.04	20.04	23.48	31.88	32.92	C00422	-	-	-	-	-	-	ko00561,ko01100,ko04714,ko04923,ko04931,ko04975,ko04977,ko04979,ko05417
LIPID-P-0829	TG(12:0_14:0_18:1)	GL	TG	44	1	766.692466	748.65809	[M+NH4]+	C47H88O6	182.8	21.48	31.28	19.28	14.72	20.92	38.64	41.6	28.32	29.8	47.6	33	41.2	43.2	40.4	C00422	-	LMGL03013217	56937007	-	-	-	ko00561,ko01100,ko04714,ko04923,ko04931,ko04975,ko04977,ko04979,ko05417
LIPID-P-0836	TG(14:0_15:0_18:1)	GL	TG	47	1	808.73584	790.70504	[M+NH4]+	C50H94O6	106.8	13.04	25.8	23.12	18.64	14.88	21.72	28.4	9.44	10.96	16.84	19.32	26.12	25.16	38	C00422	HMDB0042100	LMGL03014173	56937963	-	-	-	ko00561,ko01100,ko04714,ko04923,ko04931,ko04975,ko04977,ko04979,ko05417
LIPID-P-0837	TG(16:0_16:0_16:1)	GL	TG	48	1	822.755064	804.72069	[M+NH4]+	C51H96O6	288	173.4	93.8	122.2	90.4	81	190	135.2	118.2	57.2	91.2	414	171.4	163.6	101.2	C00422	HMDB0005359	LMGL03010017	9543986	-	-	-	ko00561,ko01100,ko04714,ko04923,ko04931,ko04975,ko04977,ko04979,ko05417
LIPID-P-0838	TG(14:0_16:0_18:1)	GL	TG	48	1	822.755064	804.72069	[M+NH4]+	C51H96O6	1084	592	416	484	233.2	488	552	516	404	320.8	440	584	520	291.6	524	C00422	HMDB0042131	LMGL03014226	56938015	-	-	-	ko00561,ko01100,ko04714,ko04923,ko04931,ko04975,ko04977,ko04979,ko05417
LIPID-P-0840	TG(15:0_16:0_18:1)	GL	TG	49	1	836.77002	818.73634	[M+NH4]+	C52H98O6	640	111.6	226	143.6	98.8	318.4	221.6	160.8	206.8	76.8	204	233.6	263.6	205.2	269.2	C00422	HMDB0043027	LMGL03015010	131754161	-	-	-	ko00561,ko01100,ko04714,ko04923,ko04931,ko04975,ko04977,ko04979,ko05417
LIPID-P-0842	TG(16:0_16:0_18:1)	GL	TG	50	1	850.786366	832.75199	[M+NH4]+	C53H100O6	2140	1100	1892	972	804	456	1356	3080	1022	848	800	2140	832	1326	1478	C00422	HMDB0005360	LMGL03010005	25240460	-	-	-	ko00561,ko01100,ko04714,ko04923,ko04931,ko04975,ko04977,ko04979,ko05417
LIPID-P-0844	TG(16:0_17:0_18:1)	GL	TG	51	1	864.802014	846.76764	[M+NH4]+	C54H102O6	668	167.6	108.4	305.6	161.6	302	184	320.4	279.6	89.2	236	232	306.4	212.8	252.4	C00422	-	LMGL03010051	-	-	-	-	ko00561,ko01100,ko04714,ko04923,ko04931,ko04975,ko04977,ko04979,ko05417
LIPID-P-0847	TG(16:0_18:0_18:1)	GL	TG	52	1	878.81744	860.78329	[M+NH4]+	C55H104O6	3704	1044	1052	548	432	1144	1868	1668	1356	412	1272	1612	1524	820	1228	C00422	HMDB0005367	LMGL03010085	5365005	-	-	-	ko00561,ko01100,ko04714,ko04923,ko04931,ko04975,ko04977,ko04979,ko05417
LIPID-P-0824	TG(10:0_16:0_16:1)	GL	TG	42	1	738.66101	720.62679	[M+NH4]+	C45H84O6	20.52	4.96	8.2	3.352	1.348	3.764	7.36	4.12	5.28	4.24	4.8	3.204	5	5.84	6.56	C00422	-	-	-	-	-	-	ko00561,ko01100,ko04714,ko04923,ko04931,ko04975,ko04977,ko04979,ko05417
LIPID-P-1220	TG(20:1_18:2_22:6)	GL	TG	60	9	974.8175	956.78329	[M+NH4]+	C63H104O6	92.8	11.88	17.4	3.72	6.64	11.24	12.36	39.84	45.6	9.72	34.96	98.8	30.2	30.48	49.2	C00422	HMDB0050602	-	131761343	-	-	-	ko00561,ko01100,ko04714,ko04923,ko04931,ko04975,ko04977,ko04979,ko05417
LIPID-P-1227	TG(18:2_20:4_20:4)	GL	TG	58	10	944.77148	926.73634	[M+NH4]+	C61H98O6	9.94	0.97	1.188	0.304	1.214	2	1.232	1.868	1.788	0.294	4.82	5.96	2.22	1.98	3.18	C00422	HMDB0005476	LMGL03011316	9545277	-	-	-	ko00561,ko01100,ko04714,ko04923,ko04931,ko04975,ko04977,ko04979,ko05417
LIPID-P-1218	TG(18:2_20:3_20:4)	GL	TG	58	9	946.78577	928.75199	[M+NH4]+	C61H100O6	241.2	32.48	30.48	16.04	65.2	60	39.12	25.36	54	4.36	279.6	140.8	73.6	64.4	74.8	C00422	HMDB0052580	LMGL03011240	9545201	-	-	-	ko00561,ko01100,ko04714,ko04923,ko04931,ko04975,ko04977,ko04979,ko05417
LIPID-P-1168	TG(15:0_16:1_22:6)	GL	TG	53	7	880.73163	862.70504	[M+NH4]+	C56H94O6	42.4	5.16	8.92	1.184	1.532	5.48	4.76	6.28	14.8	2.308	16.92	15.6	8.56	8.96	12.64	C00422	HMDB0043219	LMGL03015055	56938841	-	-	-	ko00561,ko01100,ko04714,ko04923,ko04931,ko04975,ko04977,ko04979,ko05417
LIPID-P-1166	TG(16:1_16:1_20:5)	GL	TG	52	7	866.723766	848.68939	[M+NH4]+	C55H92O6	13	2.956	2.716	1.284	2.364	3.14	3.732	0.768	3.596	1.004	15.96	5.72	2.74	3.724	4.6	C00422	HMDB0048607	LMGL03010247	56938198	-	-	-	ko00561,ko01100,ko04714,ko04923,ko04931,ko04975,ko04977,ko04979,ko05417
LIPID-P-1161	TG(20:1_22:1_18:4)	GL	TG	60	6	980.86572	962.83024	[M+NH4]+	C63H110O6	29.88	3.288	3.408	0.3444	0.428	1.592	2.968	7.04	5.92	1.848	13.16	8.76	10.48	7.36	7.52	C00422	HMDB0050560	-	131761302	-	-	-	ko00561,ko01100,ko04714,ko04923,ko04931,ko04975,ko04977,ko04979,ko05417
LIPID-P-1160	TG(18:1_18:1_24:4)	GL	TG	60	6	980.86798	962.83024	[M+NH4]+	C63H110O6	47	7.78	10.56	2.84	0.97	5.12	3.22	25.6	28	10.78	9.68	12.82	16.62	13.96	9.52	C00422	-	-	-	-	-	-	ko00561,ko01100,ko04714,ko04923,ko04931,ko04975,ko04977,ko04979,ko05417
LIPID-P-1156	TG(18:0_18:0_22:6)	GL	TG	58	6	952.83392	934.79894	[M+NH4]+	C61H106O6	91.6	4.28	6.8	1.992	3.208	8.76	5.16	11.92	19.24	1.676	25.36	51.2	16.48	13.24	22.12	C00422	HMDB0044774	LMGL03011233	101079455	-	-	-	ko00561,ko01100,ko04714,ko04923,ko04931,ko04975,ko04977,ko04979,ko05417
LIPID-P-1155	TG(18:1_18:1_22:4)	GL	TG	58	6	952.83209	934.79894	[M+NH4]+	C61H106O6	460	31.84	88.8	15.96	25.68	60.4	49.6	129.6	91.2	27.36	204	146	112.4	122	179.6	C00422	HMDB0010467	LMGL03011221	9545182	-	-	-	ko00561,ko01100,ko04714,ko04923,ko04931,ko04975,ko04977,ko04979,ko05417
LIPID-P-1154	TG(17:0_18:1_22:5)	GL	TG	57	6	938.81488	920.78329	[M+NH4]+	C60H104O6	43.6	2.46	5.8	2.4	2.408	8.92	5.8	17.16	17.08	7.24	11.2	9.56	13.12	11.16	18.44	C00422	-	LMGL03010996	9544957	-	-	-	ko00561,ko01100,ko04714,ko04923,ko04931,ko04975,ko04977,ko04979,ko05417
LIPID-P-1152	TG(18:2_18:2_20:2)	GL	TG	56	6	924.80151	906.76764	[M+NH4]+	C59H102O6	314	26.6	41.4	23.2	16.2	43.8	39.6	105.2	77.6	19.08	58.8	89.6	90.8	49.4	80	C00422	HMDB0010491	LMGL03010663	9544625	-	-	-	ko00561,ko01100,ko04714,ko04923,ko04931,ko04975,ko04977,ko04979,ko05417
LIPID-P-1151	TG(16:0_18:0_22:6)	GL	TG	56	6	924.8017	906.76764	[M+NH4]+	C59H102O6	460	65.2	87.6	16.44	39.04	111.6	76	134.8	124.4	27.96	198.8	334.4	218.4	213.2	167.6	C00422	HMDB0043939	LMGL03010853	9544814	-	-	-	ko00561,ko01100,ko04714,ko04923,ko04931,ko04975,ko04977,ko04979,ko05417
LIPID-P-1150	TG(18:0_18:2_20:4)	GL	TG	56	6	924.80151	906.76764	[M+NH4]+	C59H102O6	2220	408	436	280	260	632	440	736	1504	188.4	1756	1332	704	688	1056	C00422	HMDB0005412	LMGL03010676	9544638	-	-	-	ko00561,ko01100,ko04714,ko04923,ko04931,ko04975,ko04977,ko04979,ko05417
LIPID-P-1148	TG(16:0_17:0_22:6)	GL	TG	55	6	910.7757	892.75199	[M+NH4]+	C58H100O6	25.36	4.24	7.96	1.796	2.316	5.4	6.16	10.88	10.88	2.732	8.28	7.64	7.68	9.6	12.6	C00422	-	LMGL03010648	9544610	-	-	-	ko00561,ko01100,ko04714,ko04923,ko04931,ko04975,ko04977,ko04979,ko05417
LIPID-P-1147	TG(17:1_18:1_20:4)	GL	TG	55	6	910.78217	892.75199	[M+NH4]+	C58H100O6	56.8	7.24	10.44	3.532	4.76	9.04	8.92	21.52	14.44	3.048	18	14.88	19.32	19.92	13	C00422	-	LMGL03010500	9544463	-	-	-	ko00561,ko01100,ko04714,ko04923,ko04931,ko04975,ko04977,ko04979,ko05417
LIPID-P-1146	TG(16:0_16:0_22:6)	GL	TG	54	6	896.770716	878.73634	[M+NH4]+	C57H98O6	1608	170	145.2	16.88	28.36	122.8	92	536	436	68.8	275.6	604	275.2	265.2	318	C00422	HMDB0010418	LMGL03010526	9544489	-	-	-	ko00561,ko01100,ko04714,ko04923,ko04931,ko04975,ko04977,ko04979,ko05417
LIPID-P-1145	TG(16:0_16:1_22:5)	GL	TG	54	6	896.770716	878.73634	[M+NH4]+	C57H98O6	330	74.4	100.8	29.4	58	78.8	80.4	91.2	95.6	21.6	262	170	104.8	124.4	120	C00422	HMDB0044073	LMGL03010525	9544488	-	-	-	ko00561,ko01100,ko04714,ko04923,ko04931,ko04975,ko04977,ko04979,ko05417
LIPID-P-1219	TG(16:0_20:4_22:5)	GL	TG	58	9	946.786366	928.75199	[M+NH4]+	C61H100O6	39.68	4.36	13.12	1.908	4.64	5	3.056	15.28	8.24	1.576	28.56	20.04	9.4	10.96	12.64	C00422	HMDB0044381	LMGL03011453	9545414	-	-	-	ko00561,ko01100,ko04714,ko04923,ko04931,ko04975,ko04977,ko04979,ko05417
LIPID-P-1144	TG(16:0_18:2_20:4)	GL	TG	54	6	896.77222	878.73634	[M+NH4]+	C57H98O6	1360	172	248.8	140.4	224.4	319.6	278	296	363.2	80	916	428	440	616	516	C00422	HMDB0005391	LMGL03010399	9544362	-	-	-	ko00561,ko01100,ko04714,ko04923,ko04931,ko04975,ko04977,ko04979,ko05417
LIPID-P-1139	TG(17:1_18:2_18:3)	GL	TG	53	6	882.74475	864.72069	[M+NH4]+	C56H96O6	10.36	0.676	1.184	1.524	N/A	N/A	1.624	N/A	N/A	N/A	2.888	2.112	1.964	3.14	2.212	C00422	-	LMGL03010254	9544218	-	-	-	ko00561,ko01100,ko04714,ko04923,ko04931,ko04975,ko04977,ko04979,ko05417
LIPID-P-1138	TG(16:0_18:2_18:4)	GL	TG	52	6	868.74237	850.70504	[M+NH4]+	C55H94O6	35.64	7.92	8.4	3.412	6.52	13.24	13.52	5.2	9.04	1.068	7.8	12.92	10.84	10.28	10.68	C00422	HMDB0044271	LMGL03015732	56939514	-	-	-	ko00561,ko01100,ko04714,ko04923,ko04931,ko04975,ko04977,ko04979,ko05417
LIPID-P-1137	TG(16:1_18:2_18:3)	GL	TG	52	6	868.73779	850.70504	[M+NH4]+	C55H94O6	70.8	9.2	14.04	6.8	7.6	10.6	12.2	8.2	13.6	2.588	20.96	15.08	9.84	10.64	15.64	C00422	HMDB0048751	LMGL03010193	9544158	-	-	-	ko00561,ko01100,ko04714,ko04923,ko04931,ko04975,ko04977,ko04979,ko05417
LIPID-P-1135	TG(16:0_16:1_20:5)	GL	TG	52	6	868.739416	850.70504	[M+NH4]+	C55H94O6	123.6	11.48	14.92	4.92	5.2	9.72	12.24	17.88	27.84	2.308	23.2	17.36	20	30.48	27.52	C00422	HMDB0044077	LMGL03010215	9544180	-	-	-	ko00561,ko01100,ko04714,ko04923,ko04931,ko04975,ko04977,ko04979,ko05417
LIPID-P-1125	TG(16:0_18:1_24:4)	GL	TG	58	5	954.84448	936.81459	[M+NH4]+	C61H108O6	143.2	11.72	18.84	4.24	2.74	4.68	9.12	70.4	46	12.6	11.52	17.8	31.68	17.8	31.4	C00422	-	-	-	-	-	-	ko00561,ko01100,ko04714,ko04923,ko04931,ko04975,ko04977,ko04979,ko05417
LIPID-P-1124	TG(18:0_18:1_22:4)	GL	TG	58	5	954.8457	936.81459	[M+NH4]+	C61H108O6	52	5.2	10.4	3.924	3.98	7.24	6.96	9.84	24.28	3.824	66.4	29.8	24.04	15.72	25.44	C00422	HMDB0044956	LMGL03011144	131755969	-	-	-	ko00561,ko01100,ko04714,ko04923,ko04931,ko04975,ko04977,ko04979,ko05417
LIPID-P-1123	TG(18:1_18:2_22:2)	GL	TG	58	5	954.84351	936.81459	[M+NH4]+	C61H108O6	22.72	2.552	5.28	1.596	0.576	2.928	4.08	10.68	9.88	2.252	5.92	7.32	8.36	5.6	8.44	C00422	HMDB0049398	LMGL03011214	9545175	-	-	-	ko00561,ko01100,ko04714,ko04923,ko04931,ko04975,ko04977,ko04979,ko05417
LIPID-P-1122	TG(18:2_18:2_22:1)	GL	TG	58	5	954.84814	936.81459	[M+NH4]+	C61H108O6	13.26	2.92	6.7	1.36	0.662	3.58	3.12	6.56	9.68	2.14	3.4	5.04	6.34	5.66	6.68	C00422	HMDB0052591	LMGL03011124	25240388	-	-	-	ko00561,ko01100,ko04714,ko04923,ko04931,ko04975,ko04977,ko04979,ko05417
LIPID-P-1118	TG(17:1_18:1_22:3)	GL	TG	57	5	940.84564	922.79894	[M+NH4]+	C60H106O6	11.44	2.48	5.08	0.6	0.5	1.72	2.288	5.88	4.4	2.608	3.392	3.276	4.24	2.38	3.272	C00422	-	LMGL03010838	9544799	-	-	-	ko00561,ko01100,ko04714,ko04923,ko04931,ko04975,ko04977,ko04979,ko05417
LIPID-P-1117	TG(18:2_18:2_20:1)	GL	TG	56	5	926.81641	908.78329	[M+NH4]+	C59H104O6	78.4	19.08	26.64	8.36	5.52	10.08	15.4	24	24.64	7.48	12.16	27.76	26.88	20.36	24.6	C00422	HMDB0005473	LMGL03010596	25240380	-	-	-	ko00561,ko01100,ko04714,ko04923,ko04931,ko04975,ko04977,ko04979,ko05417
LIPID-P-1116	TG(18:0_18:1_20:4)	GL	TG	56	5	926.81738	908.78329	[M+NH4]+	C59H104O6	252.8	50	70.4	28.32	53.2	114.8	136.4	75.6	163.6	14.92	424	241.6	171.6	145.2	148.8	C00422	HMDB0005406	LMGL03010615	9544577	-	-	-	ko00561,ko01100,ko04714,ko04923,ko04931,ko04975,ko04977,ko04979,ko05417
LIPID-P-1114	TG(16:0_18:1_22:4)	GL	TG	56	5	926.81519	908.78329	[M+NH4]+	C59H104O6	412	86	127.6	27.76	32.8	93.6	108	116	214	31.04	428	170.8	193.6	238.4	269.6	C00422	HMDB0044128	LMGL03010775	9544736	-	-	-	ko00561,ko01100,ko04714,ko04923,ko04931,ko04975,ko04977,ko04979,ko05417
LIPID-P-1142	TG(18:1_18:2_18:3)	GL	TG	54	6	896.770716	878.73634	[M+NH4]+	C57H98O6	508	85.2	98.4	54	81.2	99.2	87.6	100	129.6	28.44	144.4	126.4	151.6	126	171.2	C00422	HMDB0010481	LMGL03010373	53480537	-	-	-	ko00561,ko01100,ko04714,ko04923,ko04931,ko04975,ko04977,ko04979,ko05417
LIPID-P-1170	TG(16:0_18:2_20:5)	GL	TG	54	7	894.75232	876.72069	[M+NH4]+	C57H96O6	87.6	31.8	31.68	10.68	31.96	48.8	33.32	23	45.6	4.28	156.8	72	49.2	34.12	62.4	C00422	HMDB0044273	LMGL03010451	9544414	-	-	-	ko00561,ko01100,ko04714,ko04923,ko04931,ko04975,ko04977,ko04979,ko05417
LIPID-P-1169	TG(18:2_18:2_18:3)	GL	TG	54	7	894.755066	876.72069	[M+NH4]+	C57H96O6	51.6	21.6	25.2	15.74	13.5	13.34	13.24	15.08	24	8.1	33.8	21.6	16.7	20	21	C00422	HMDB0010490	LMGL03010420	9544383	-	-	-	ko00561,ko01100,ko04714,ko04923,ko04931,ko04975,ko04977,ko04979,ko05417
LIPID-P-1174	TG(15:0_18:1_22:6)	GL	TG	55	7	908.77136	890.73634	[M+NH4]+	C58H98O6	216.4	31.44	23.16	6.76	13.76	39.16	35.56	52.8	65.6	12.2	71.6	103.6	51.6	29.32	47.6	C00422	HMDB0043248	LMGL03015165	56938947	-	-	-	ko00561,ko01100,ko04714,ko04923,ko04931,ko04975,ko04977,ko04979,ko05417
LIPID-P-1202	TG(16:1_16:1_24:6)	GL	TG	56	8	920.76624	902.73634	[M+NH4]+	C59H98O6	201.2	21.36	40.4	8.72	37.92	65.6	28.04	35.2	59.2	7.72	108	146	70	65.6	62.8	C00422	-	-	-	-	-	-	ko00561,ko01100,ko04714,ko04923,ko04931,ko04975,ko04977,ko04979,ko05417
LIPID-P-1203	TG(17:0_18:2_22:6)	GL	TG	57	8	934.78571	916.75199	[M+NH4]+	C60H100O6	70.8	10.04	12.44	4.88	6.92	17.72	14.24	19.24	31.64	6.4	48.8	58	26.2	18.72	32.96	C00422	-	LMGL03011153	9545114	-	-	-	ko00561,ko01100,ko04714,ko04923,ko04931,ko04975,ko04977,ko04979,ko05417
LIPID-P-1205	TG(18:1_18:1_22:6)	GL	TG	58	8	948.79718	930.76764	[M+NH4]+	C61H102O6	304	55.6	78.4	32.2	45.6	134.2	48.4	68.4	224	38.4	130.8	566	216	176.2	154.2	C00422	HMDB0010465	LMGL03011389	9545350	-	-	-	ko00561,ko01100,ko04714,ko04923,ko04931,ko04975,ko04977,ko04979,ko05417
LIPID-P-1206	TG(18:0_18:2_22:6)	GL	TG	58	8	948.8009	930.76764	[M+NH4]+	C61H102O6	1976	252.4	544	164.4	195.6	484	444	524	1268	239.6	476	3032	1396	952	1300	C00422	HMDB0045098	LMGL03011388	9545349	-	-	-	ko00561,ko01100,ko04714,ko04923,ko04931,ko04975,ko04977,ko04979,ko05417
LIPID-P-1208	TG(17:1_17:1_24:6)	GL	TG	58	8	948.8009	930.76764	[M+NH4]+	C61H102O6	48	5	12.92	2.484	3.088	7.48	9.08	14.72	14.04	4.2	23.64	18.32	19.8	18.12	15.28	C00422	-	-	-	-	-	-	ko00561,ko01100,ko04714,ko04923,ko04931,ko04975,ko04977,ko04979,ko05417
LIPID-P-1201	TG(16:1_18:1_22:6)	GL	TG	56	8	920.76624	902.73634	[M+NH4]+	C59H98O6	292.8	42.8	47.6	11.4	22.24	58.4	49.2	57.6	54	10.52	112.8	151.2	65.6	63.2	93.6	C00422	HMDB0048631	LMGL03011000	9544961	-	-	-	ko00561,ko01100,ko04714,ko04923,ko04931,ko04975,ko04977,ko04979,ko05417
LIPID-P-1209	TG(18:1_20:1_22:6)	GL	TG	60	8	976.83276	958.79894	[M+NH4]+	C63H106O6	85.2	20.96	23.48	6.36	7.36	28.12	20.04	40.4	74.4	9.32	25.24	168.8	32.52	41.2	56	C00422	HMDB0049322	LMGL03011766	9545727	-	-	-	ko00561,ko01100,ko04714,ko04923,ko04931,ko04975,ko04977,ko04979,ko05417
LIPID-P-1211	TG(18:1_22:1_22:6)	GL	TG	62	8	1004.86475	986.83024	[M+NH4]+	C65H110O6	5.52	1.956	1.716	N/A	0.1292	0.672	0.876	0.936	1.8	0.3188	6.08	5.12	3.62	2.62	2.384	C00422	HMDB0049364	LMGL03012199	9546160	-	-	-	ko00561,ko01100,ko04714,ko04923,ko04931,ko04975,ko04977,ko04979,ko05417
LIPID-P-1212	TG(18:2_18:3_18:4)	GL	TG	54	9	890.72583	872.68939	[M+NH4]+	C57H92O6	1.96	N/A	0.62	0.844	N/A	0.872	0.508	0.608	0.824	0.904	1.172	1.076	0.66	1.06	1.164	C00422	HMDB0052645	LMGL03016289	56940071	-	-	-	ko00561,ko01100,ko04714,ko04923,ko04931,ko04975,ko04977,ko04979,ko05417
LIPID-P-1214	TG(16:1_16:2_22:6)	GL	TG	54	9	890.724	872.68939	[M+NH4]+	C57H92O6	18.72	1.44	3.824	1.216	1.972	1.984	1.584	3.092	3.344	0.3776	10.44	3.264	3.052	5.56	5.08	C00422	-	-	-	-	-	-	ko00561,ko01100,ko04714,ko04923,ko04931,ko04975,ko04977,ko04979,ko05417
LIPID-P-1215	TG(16:1_18:2_22:6)	GL	TG	56	9	918.75494	900.72069	[M+NH4]+	C59H96O6	213.6	13.32	30.32	8.4	17.4	42.4	32.6	36.8	57.6	8.2	94.4	84.8	36.4	48.8	48.8	C00422	HMDB0048763	LMGL03011075	9545036	-	-	-	ko00561,ko01100,ko04714,ko04923,ko04931,ko04975,ko04977,ko04979,ko05417
LIPID-P-1216	TG(18:2_18:3_20:4)	GL	TG	56	9	918.755066	900.72069	[M+NH4]+	C59H96O6	20.36	2.524	5.6	5.6	8	15.68	6.04	3.276	10.4	0.3744	48	18.24	9.72	15.88	15.84	C00422	HMDB0005448	LMGL03010876	9544831	-	-	-	ko00561,ko01100,ko04714,ko04923,ko04931,ko04975,ko04977,ko04979,ko05417
LIPID-P-1217	TG(18:1_18:2_22:6)	GL	TG	58	9	946.78754	928.75199	[M+NH4]+	C61H100O6	808	67.6	101.6	32.76	58.4	146	123.2	108.8	230	46	244.4	644	186.4	187.6	146.4	C00422	HMDB0049406	LMGL03011467	9545428	-	-	-	ko00561,ko01100,ko04714,ko04923,ko04931,ko04975,ko04977,ko04979,ko05417
LIPID-P-1210	TG(18:1_20:3_22:4)	GL	TG	60	8	976.82965	958.79894	[M+NH4]+	C63H106O6	116.4	8.32	37.12	5.84	4.56	17.64	12.4	36	54.4	25.16	7.64	60.8	41.2	31.32	32.92	C00422	HMDB0049336	LMGL03011746	9545707	-	-	-	ko00561,ko01100,ko04714,ko04923,ko04931,ko04975,ko04977,ko04979,ko05417
LIPID-P-1200	TG(16:0_18:2_22:6)	GL	TG	56	8	920.76624	902.73634	[M+NH4]+	C59H98O6	1772	236	320	88	172.8	452	364	388	592	70.4	796	1300	576	346.8	576	C00422	HMDB0044275	LMGL03010999	9544960	-	-	-	ko00561,ko01100,ko04714,ko04923,ko04931,ko04975,ko04977,ko04979,ko05417
LIPID-P-1197	TG(16:1_16:1_22:6)	GL	TG	54	8	892.7251	874.70504	[M+NH4]+	C57H94O6	170.8	32.48	29.84	9.44	15.24	30.6	16.32	53.6	39.32	8.6	118.4	116.4	50	63.2	66	C00422	HMDB0048609	LMGL03010649	9544611	-	-	-	ko00561,ko01100,ko04714,ko04923,ko04931,ko04975,ko04977,ko04979,ko05417
LIPID-P-1196	TG(18:2_18:3_18:3)	GL	TG	54	8	892.739416	874.70504	[M+NH4]+	C57H94O6	4.96	1.728	1.132	3.012	1.404	2.016	0.66	1.86	1.788	1.6	1.736	2.164	2.832	2.052	1.828	C00422	HMDB0052637	LMGL03010471	9544434	-	-	-	ko00561,ko01100,ko04714,ko04923,ko04931,ko04975,ko04977,ko04979,ko05417
LIPID-P-1175	TG(17:0_18:2_20:5)	GL	TG	55	7	908.77051	890.73634	[M+NH4]+	C58H98O6	3.032	1.14	0.992	0.612	1.02	1.152	1.944	2.2	1.936	0.676	5.48	2.812	2.888	1.876	2.96	C00422	-	LMGL03010560	9544522	-	-	-	ko00561,ko01100,ko04714,ko04923,ko04931,ko04975,ko04977,ko04979,ko05417
LIPID-P-1176	TG(18:1_18:2_20:4)	GL	TG	56	7	922.78271	904.75199	[M+NH4]+	C59H100O6	584	78.4	156	49.2	88	196.4	60.4	110	167.6	18.32	412	171.6	184	108.4	199.6	C00422	HMDB0005462	LMGL03010741	9544702	-	-	-	ko00561,ko01100,ko04714,ko04923,ko04931,ko04975,ko04977,ko04979,ko05417
LIPID-P-1177	TG(16:0_18:1_22:6)	GL	TG	56	7	922.786366	904.75199	[M+NH4]+	C59H100O6	4600	508	1236	251.2	364	816	996	1980	1432	334	2272	3360	1492	2080	1492	C00422	HMDB0044135	LMGL03010925	9544886	-	-	-	ko00561,ko01100,ko04714,ko04923,ko04931,ko04975,ko04977,ko04979,ko05417
LIPID-P-1181	TG(18:0_18:1_22:6)	GL	TG	58	7	950.817666	932.78329	[M+NH4]+	C61H104O6	476	45.2	63.6	17.96	33.68	71.6	56.4	106	255.6	30.6	214	383.6	206.8	126	234	C00422	HMDB0044936	LMGL03011311	9545272	-	-	-	ko00561,ko01100,ko04714,ko04923,ko04931,ko04975,ko04977,ko04979,ko05417
LIPID-P-1182	TG(18:1_18:1_22:5)	GL	TG	58	7	950.817666	932.78329	[M+NH4]+	C61H104O6	1040	70.8	172.4	20.16	18.88	74	87.2	224	332.8	158	339.2	398	211.6	172.4	208	C00422	HMDB0010468	LMGL03011305	9545266	-	-	-	ko00561,ko01100,ko04714,ko04923,ko04931,ko04975,ko04977,ko04979,ko05417
LIPID-P-1183	TG(18:1_18:2_22:4)	GL	TG	58	7	950.817666	932.78329	[M+NH4]+	C61H104O6	59.6	7.84	11.92	2.888	4.16	13	5.44	13.56	21.52	2.836	71.6	28.4	27.56	28.36	28.08	C00422	HMDB0049399	LMGL03011298	9545259	-	-	-	ko00561,ko01100,ko04714,ko04923,ko04931,ko04975,ko04977,ko04979,ko05417
LIPID-P-1184	TG(16:0_20:2_22:5)	GL	TG	58	7	950.817666	932.78329	[M+NH4]+	C61H104O6	119.2	19.44	29.6	2.88	5.24	13.24	15.16	24.04	50	18.48	19.52	30	26.84	22.56	38.12	C00422	HMDB0044325	LMGL03011299	9545260	-	-	-	ko00561,ko01100,ko04714,ko04923,ko04931,ko04975,ko04977,ko04979,ko05417
LIPID-P-1186	TG(19:0_18:1_22:6)	GL	TG	59	7	964.83331	946.79894	[M+NH4]+	C62H106O6	5.88	0.788	2.276	0.504	0.648	1.092	0.3496	1.628	2.068	0.3928	4.2	2.884	2.416	1.376	1.828	C00422	-	-	-	-	-	-	ko00561,ko01100,ko04714,ko04923,ko04931,ko04975,ko04977,ko04979,ko05417
LIPID-P-1187	TG(18:1_20:1_22:5)	GL	TG	60	7	978.84796	960.81459	[M+NH4]+	C63H108O6	7.44	0.888	2.924	0.1928	0.936	2.212	1.42	N/A	2.644	0.492	14.36	4.96	4.48	4.16	3.324	C00422	HMDB0049316	LMGL03011684	9545645	-	-	-	ko00561,ko01100,ko04714,ko04923,ko04931,ko04975,ko04977,ko04979,ko05417
LIPID-P-1188	TG(18:0_18:1_24:6)	GL	TG	60	7	978.8443	960.81459	[M+NH4]+	C63H108O6	20.68	1.148	1.564	0.492	0.2724	0.976	0.744	2.636	3.496	1.016	1	1.08	2.084	2.12	2.8	C00422	-	-	-	-	-	-	ko00561,ko01100,ko04714,ko04923,ko04931,ko04975,ko04977,ko04979,ko05417
LIPID-P-1190	TG(16:0_22:1_22:6)	GL	TG	60	7	978.84973	960.81459	[M+NH4]+	C63H108O6	28.32	0.628	1.208	0.1876	0.2068	1.228	0.756	4.04	3.212	0.648	1.464	2.212	2.232	2.356	1.704	C00422	HMDB0044219	LMGL03011830	9545791	-	-	-	ko00561,ko01100,ko04714,ko04923,ko04931,ko04975,ko04977,ko04979,ko05417
LIPID-P-1171	TG(16:0_16:1_22:6)	GL	TG	54	7	894.755066	876.72069	[M+NH4]+	C57H96O6	1368	108.8	196	46.8	101.6	232	245.6	382	572	70	792	544	385.6	460	552	C00422	HMDB0044079	LMGL03010586	9544548	-	-	-	ko00561,ko01100,ko04714,ko04923,ko04931,ko04975,ko04977,ko04979,ko05417
LIPID-P-0822	TG(8:0_16:0_18:1)	GL	TG	42	1	738.65857	720.62679	[M+NH4]+	C45H84O6	16.76	5.16	5.6	4	1.984	7.24	3.384	6.04	5.12	2.232	6.32	4.96	4.64	7.24	6.76	C00422	-	-	-	-	-	-	ko00561,ko01100,ko04714,ko04923,ko04931,ko04975,ko04977,ko04979,ko05417
LIPID-P-1890	TG(O-16:0_16:0_20:4)	GL	TG-O	52	4	858.791449	840.757075	[M+NH4]+	C55H100O5	6.32	2.892	1.684	1.272	1.996	2.292	1.9	2.316	2.364	0.74	2.06	2.068	1.928	3.548	3.148	-	-	-	-	-	-	-	-
LIPID-P-1891	TG(O-18:0_16:0_20:4)	GL	TG-O	54	4	886.822749	868.788375	[M+NH4]+	C57H104O5	16.76	3.284	6.28	3.236	1.392	2.564	3.9	11.56	4.8	1.652	1.18	4.96	4.88	6.28	5.68	-	-	-	-	-	-	-	-
LIPID-P-1907	TG(O-18:2_20:2_20:2)	GL	TG-O	58	6	938.854049	920.819675	[M+NH4]+	C61H108O5	3.42	0.408	0.78	N/A	N/A	N/A	0.568	4.16	1.176	0.374	1.116	1.468	1.2	1.34	1.6	-	-	-	-	-	-	-	-
